# Supplementary material for: Global, regional, and national age-sex specific mortality for 264 causes of death, 1980–2016: a systematic analysis for the Global Burden of Disease Study 2016
Source: PubMed Central journal article supplement (PMC5605883; doi:10.1016/s0140-6736(17)32152-9), 2017-09-16
Supplement: mmc1.pdf [file mmc1.pdf]

# THE LANCET

## Supplementary appendix 1

This appendix formed part of the original submission and has been peer reviewed. We post it as supplied by the authors.

Supplement to: GBD 2016 Causes of Death Collaborators. Global, regional, and national age-sex specific mortality for 264 causes of death, 1980–2016: a systematic analysis for the Global Burden of Disease Study 2016. *Lancet* 2017; **390**: 1151–210.

## Appendix 1: Methods

Methods appendix to “Global, regional, and national age-sex specific mortality for 264 causes of death, 1980–2016: a systematic analysis for the Global Burden of Disease Study 2016”

### Preamble

This appendix provides further methodological detail for “Global, regional, and national age-sex specific mortality for 264 causes of death, 1980–2016: a systematic analysis for the Global Burden of Disease Study 2016.” This appendix is organized into sections that follow the structure of the main paper. This study complies with the Guidelines for Accurate and Transparent Health Estimates Reporting (GATHER) recommendations. It includes detailed tables and information on data in an effort to maximize transparency in our estimation processes and provide a comprehensive description of analytical steps. We intend this appendix to be a living document, to be updated with each iteration of the Global Burden of Disease Study.

### Table of Contents

|                                                                        |    |
|------------------------------------------------------------------------|----|
| <b>Author Contributions</b> .....                                      | i  |
| <b>Section 1: GBD Overview</b> .....                                   | 4  |
| 1.1 Geographic locations of analysis .....                             | 4  |
| 1.2 Time period of analysis .....                                      | 4  |
| 1.3 Statement of GATHER compliance .....                               | 4  |
| 1.4 List of abbreviations .....                                        | 4  |
| 1.5 GBD results overview .....                                         | 8  |
| 1.6 Data input sources overview .....                                  | 8  |
| 1.7 Funding sources .....                                              | 9  |
| <b>Section 2: GBD 2016 Causes of death database</b> .....              | 9  |
| 2.1 Background.....                                                    | 9  |
| 2.2 Cause of death data identification .....                           | 9  |
| 2.3 Step 1. Standardize input data .....                               | 14 |
| 2.4 Step 2. Map to GBD cause list .....                                | 16 |
| 2.5 Step 3. Age-sex splitting .....                                    | 17 |
| 2.6 Step 4. Correct age-sex violations .....                           | 18 |
| 2.7 Step 5. Redistribution .....                                       | 19 |
| 2.8 Step 6. HIV/AIDS misclassification correction .....                | 22 |
| 2.9 Step 7. Scale strata to province .....                             | 23 |
| 2.10 Step 8. Restrictions post-redistribution .....                    | 23 |
| 2.11 Step 9. Drop VR country years or mark as non-representative ..... | 24 |
| 2.12 Step 10. Cause aggregation .....                                  | 24 |

|                                                                                                                                                                                                                                                                                                                                                                     |            |
|---------------------------------------------------------------------------------------------------------------------------------------------------------------------------------------------------------------------------------------------------------------------------------------------------------------------------------------------------------------------|------------|
| 2.13 Step 11. Remove shocks and HIV/AIDS maternal adjustments .....                                                                                                                                                                                                                                                                                                 | 25         |
| 2.14 Step 12. Noise reduction .....                                                                                                                                                                                                                                                                                                                                 | 28         |
| 2.15 Step 13. CoD database and outlier identification .....                                                                                                                                                                                                                                                                                                         | 30         |
| 2.16 Causes of death data star rating calculation .....                                                                                                                                                                                                                                                                                                             | 31         |
| <b>Section 3: Causes of death modeling methods.....</b>                                                                                                                                                                                                                                                                                                             | <b>33</b>  |
| 3.1 CODEm.....                                                                                                                                                                                                                                                                                                                                                      | 33         |
| 3.2 Causes modeled outside of CODEm.....                                                                                                                                                                                                                                                                                                                            | 35         |
| 3.3 Cause of death modeling descriptions.....                                                                                                                                                                                                                                                                                                                       | 39         |
| <b>Section 4: Central computation.....</b>                                                                                                                                                                                                                                                                                                                          | <b>279</b> |
| 4.1 Correction for miscoding of Alzheimer’s and other dementias and Parkinson’s disease.....                                                                                                                                                                                                                                                                        | 279        |
| 4.2 Imported cases.....                                                                                                                                                                                                                                                                                                                                             | 280        |
| 4.3 CodCorrect.....                                                                                                                                                                                                                                                                                                                                                 | 280        |
| 4.4 Years of Life Lost (YLLs) calculation.....                                                                                                                                                                                                                                                                                                                      | 281        |
| 4.5 Socio-Demographic Index (SDI).....                                                                                                                                                                                                                                                                                                                              | 282        |
| <b>Section 5: References .....</b>                                                                                                                                                                                                                                                                                                                                  | <b>286</b> |
| <b>Section 6. Figures and Tables .....</b>                                                                                                                                                                                                                                                                                                                          | <b>288</b> |
| <br>                                                                                                                                                                                                                                                                                                                                                                |            |
| <b>Appendix Figures</b>                                                                                                                                                                                                                                                                                                                                             |            |
| <b>Appendix Figure 1.</b> Analytical flowchart for the development of the GBD 2016 causes of death database.....                                                                                                                                                                                                                                                    | 288        |
| <b>Appendix Figure 2.</b> GBD 2016 causes of death estimation flowchart.....                                                                                                                                                                                                                                                                                        | 289        |
| <b>Appendix Figure 3.</b> GBD 2016 DisMod-MR 2.1 analytical cascade.....                                                                                                                                                                                                                                                                                            | 290        |
| <b>Appendix Figure 4.</b> Vital Registration and Verbal Autopsy data availability by country, 1980-2016.....                                                                                                                                                                                                                                                        | 291        |
| <br>                                                                                                                                                                                                                                                                                                                                                                |            |
| <b>Appendix Tables</b>                                                                                                                                                                                                                                                                                                                                              |            |
| <b>Appendix Table 1.</b> GATHER checklist of information that should be included in reports of global health estimates, with description of compliance and location of information for GBD 2016. Global, regional, and national cause-specific mortality for 264 causes of death, 1980-2016: a systematic analysis for the Global Burden of Disease Study 2016..... | 292        |
| <b>Appendix Table 2.</b> Total number of site years by cause and source type for 2016.....                                                                                                                                                                                                                                                                          | 295        |
| <b>Appendix Table 3.</b> List of International Classification of Diseases (ICD) codes mapped to the Global Burden of Disease cause list for causes of death.....                                                                                                                                                                                                    | 300        |
| <b>Appendix Table 4.</b> Restrictions on age and sex by cause for GBD 2016.....                                                                                                                                                                                                                                                                                     | 309        |
| <b>Appendix Table 5.</b> HIV/AIDS-related garbage code redistribution packages.....                                                                                                                                                                                                                                                                                 | 320        |

|                                                                                                                                                                                                                |     |
|----------------------------------------------------------------------------------------------------------------------------------------------------------------------------------------------------------------|-----|
| <b>Appendix Table 6.</b> CODEm covariates used, level of covariate, and expected direction of covariate by cause, sex, and age.....                                                                            | 321 |
| <b>Appendix Table 7.</b> CODEm predictive validity results by cause, model type sex, and age.....                                                                                                              | 367 |
| <b>Appendix Table 8.</b> Comparison of GBD 2015 and GBD 2016 covariates and level of covariates used in cause of death modeling.....                                                                           | 376 |
| <b>Appendix Table 9.</b> Modeling strategy for individual cause of death models in GBD 2016.....                                                                                                               | 411 |
| <b>Appendix Table 10.</b> CoDCorrect cause hierarchy with levels.....                                                                                                                                          | 414 |
| <b>Appendix Table 11.</b> Percent change after CoDCorrect by cause for all ages, both sexes, 2016.....                                                                                                         | 420 |
| <b>Appendix Table 12.</b> Socio-demographic Index R-squared values with lags up to 10 years.....                                                                                                               | 429 |
| <b>Appendix Table 13.</b> Socio-demographic Index groupings by location, based on 2016 values.....                                                                                                             | 430 |
| <b>Appendix Table 14.</b> Socio-demographic Index values for all estimated GBD 2016 locations, 1980-2016.....                                                                                                  | 446 |
| <b>Appendix Table 15.</b> GBD 2016 location hierarchy with levels.....                                                                                                                                         | 460 |
| <b>Appendix Table 16.</b> Causes included in the 2016 Global Burden of Disease Study.....                                                                                                                      | 477 |
| <b>Appendix Table 17.</b> Underlying indicators for percent well-certified calculation, based on the maximum percent well certified data source in each 5-year time interval for 195 countries, 1980-2016..... | 490 |
| <b>Appendix Table 18.</b> Theoretical minimum risk reference life table.....                                                                                                                                   | 503 |
| <b>Appendix Table 19.</b> GBD world population age standard.....                                                                                                                                               | 504 |

## Authors' Contributions

### Managing the estimation process

Ashkan Afshin, Tahiya Alam, Megha Arora, James Bennett, Kara Estep, Christina Fitzmaurice, Emmanuela Gakidou, Jamie Hancock, Caitie Hawley, Simon Hay, Sarah Johnson, Nicholas Kassebaum, Michael Kutz, Darya Li Kappe, Hmwe Kyu, Stephen Lim, Madeline McGaughey, Christopher Murray, Mohsen Naghavi, Helen Olsen, Christine Pinho, Puja Rao, Robert Reiner, Gregory Roth, Joseph Salama, Katya Shackelford, Chloe Shields, Shreya Shirude, Amber Sligar, Mari Smith, Vinay Srinivasan, Jeffrey Stanaway, Caitlyn Steiner, Theo Vos, and Haidong Wang.

### Writing the first draft of the manuscript

Laurie B Marczak, Christopher J L Murray, Mohsen Naghavi, and Sarah E Ray.

### Providing data or critical feedback on data sources

Cristiana Abbafati, Foad Abd-Allah, Semaw M Abera, Olatunji Adetokunboh, Ashkan Afshin, Aliasghar Ahmad Kiadaliri, Muktar Venkata Satyanarayana Ahmed, Amani Nidhal Aichour, Ibtihel Aichour, Miloud Taki Eddine Aichour, Fares Alahdab, Khurshid Alam, Tahiya Alam, Kefyalew Addis Alene, Ayman Al-Eyadhy, Reza Alizadeh-Navaei, Juma M Alkaabi, Ala'a Alkerwi, François Alla, Peter N Allebeck, Christine Allen, Rajaa Al-Raddadi, Ubai Alsharif, Khalid A Altirkawi, Azmeraw T Amare, Erfan Amini, Walid Ammar, Nahla Anber, Catalina Liliana Andrei, Sofia Androudi, Hossein Ansari, Carl Abelardo T Antonio, Palwasha Anwari, Johan Ärnlöv, Al Artaman, Krishna Kumar Aryal, Hamid Asayesh, Solomon Asgedom, Ashish Awasthi, Umar Bacha, Kalpana Balakrishnan, Aleksandra Barac, Simón Barquera, Lars Barregard, Lope H Barrero, Bernhard T Baune, Neeraj J Bedi, Kelly Beinhoff, Yannick Béjot, Bayu Begashaw Bekele, Eduardo Bernabé, Balem Demtsu Betsu, Mircea Beuran, Boris Bikbov, Donal Bisanzio, Rupert W Bourne, Lemma Negesa Bulto Bulto, Blair Bumgarner, Lucero Cahuana-Hurtado, Julio Cesar Campuzano, Josip Car, Carlos A Castañeda-Orjuela, Ferrán Catalá-López, Chioma Ezinne Chibueze, Odgerel Chimed-Ochir, Abdulaal A Chitbeer, Devasahayam Jesudas Christopher, Massimo Cirillo, Cyrus Cooper, Benjamin C Cowie, Michael Robert Criqui, Lalit Dandona, Rakhi Dandona, José das Neves, Louisa Degenhardt, Kebede Deribe, Amare Deribew, Subhojit Dey, Shirin Raj Djalalinia, Dirk Douwes-Schultz, Tim Driscoll, Manisha Dubey, Bruce Bartholow Duncan, Ziad A El-Khatib, Alireza Esteghamati, Kara Estep, Carla Sofia e Sa Farinha, Valery Feigin, Seyed-Mohammad Fereshtehnejad, Joao C Fernandes, Tesfaye Feyissa, Irina Filip, Florian Fischer, Abraham D Flaxman, Nancy Fullman, Thomas Fürst, João M M Furtado, Emmanuela Gakidou, Johanna M Geleijnse, Hailay Abrha Gesesew, Maurice Giroud, Audra L Gold, Philimon Gona, Hebe N Gouda, Nima Hafezi-Nejad, Alemayehu Desalegne Hailu, Gessesew Bugssa Hailu, Mitiku Hambisa, Hilda L Harb, Rasmus J D Havmoeller, Simon Hay, Mohammad Rasoul Hedayati, Nathaniel Henry, Ileana Beatriz Heredia-Pi, Claudiu Herteliu, Hans W Hoek, Nobuyuki Horita, H Dean Hosgood, Peter J Hotez, Damian G Hoy, Kim Moesgaard Iburg, Bogdan Vasile Ileanu, Asnake Ararsa Irenso, Kathryn H Jacobsen, Nader Jahanmehr, Mihajlo Jakovljevic, Mehdi Merid Javanbakht, Panniyammakal Jeemon, Vivekanand Jha, Catherine Johnson, Sarah B Johnson, Jost B Jonas, Mik M Jürisson, Zubair Kabir, Rajendra Kadel, Ritul Kamal, André Karch, Seyed Karimi, Amir Kasaeian, Nigussie Kassaw, Nicholas Assefa Kassebaum, Srinivasa Katikireddi, Norito Kawakami, Chandrasekharan Nair Kesavachandran, Yousef Khader, Young-Ho Saleh Khang, Abdullah Tawfih Abdullah Khoja, Ardeshir Khosravi, Jagdish Khubchandani, Christian Kieling, Yun Jin Ziad Kim, Ruth G Kimokoti, Yohannes Kinfu, Ann Kristin Knudsen, Soewarta Kosen, Kristopher J Krohn, Barthélemy Kuate Defo, G Anil Kumar, Pushpendra Kumar, Hmwe H Kyu, Dharmesh Kumar Lal, Nkurunziza Lambert, Qing Lan, Anders Larsson, James Leigh, Miriam Legesse Levi, Darya Li Kappe, Xiaofeng Liang, Misgan Teshome Liben, Giancarlo Logroscino, Alan D Lopez, Stefan Lorkowski,

Rafael Lozano, Stefan Ma, Marek Inês Majdan, Azeem Majeed, Reza Malekzadeh, Deborah Carvalho Malta, Tsegahun J Manyazewal, Desalegn Markos, Colm McAlinden, Suresh Mehata, Toni Meier, Kidanu Gebremariam Meles, Ziad Memish, Melkamu H Mengesha, Desalegn Tadesse Mengistu, Bereket Gebremichael Menota, George A Mensah, Atte Meretoja, Tuomo Meretoja, Ted Regassa Miller, Shiva I Mishra, Karzan Mohammad, Shafiu Mohammed, Ali Huyen Mokdad, Mariam G Molokhia, Lorenzo Monasta, Marcella Montico, Maziar Moradi-Lakeh, Chloe Morozoff, Christopher J L Murray, Gudlavalleti Z Murthy, Kamarul Imran Musa, Jean B Nachega, Mohsen Naghavi, Luigi Naldi, Bruno Ramos Nascimento, Ionut Negoii, Grant Nguyen, Quyen Nguyen, Felix Akpojene Ogbo, Andrew Toyin Olagunju, Bolajoko Olubukunola Olusanya, Jacob Olusegun Olusanya, Alberto Ortiz, Majdi Osman, Mahesh PA, Smita Pakhale, Adrian Pana, Basant Kumar Panda, Songhomitra Panda-Jonas, Christina Papachristou, Scott Ferede Patten, Deepak Paudel, David M Pereira, Fernando Perez-Ruiz, Norberto Perico, Michael B Phillips, David M Pigott, Suzanne Alemu Polinder, Farshad Pourmalek, Mostafa Babale Qorbani, Amir Radfar, Vafa L Rahimi-Movaghar, Mahfuzar Rahman, Rajesh Kumar Rai, Goura Kishor Rath, Salman Rawaf, Jürgen Rehm, Giuseppe Remuzzi, Mohammad Sadegh T Rezai, Mohammad Bagher Rokni, Luca Ronfani, Gholamreza Roshandel, Gregory A Roth, Dietrich Rothenbacher, George Mugambage Ruhago, Rizwan G S A, Soheil W Saadat, Saeid Safiri, Rajesh Sagar, Joseph Salama, Payman Salamati, Joshua A Salomon, Abdallah M Samy, Juan Ramon Sanabria, Iamar S Santos, Milena Santric Milicevic, Benn Sartorius, Maheswar Satpathy, Monika Sawhney, Maria Schmidt, David C Schwebel, Falk Schwendicke, Sadaf Sepanlou, Edson E Servan-Mori, Masood Shaikh, Morteza Shamsizadeh, Sheikh Mohammed Shariful Islam, Jayendra Sharma, Sara Charlotte Sheikhbahaei, Mark Andrew Shrimel, Abhishek Singh, Jasvinder A Singh, Eirini Skiadaresi, Samir Soneji, Reed Sorensen, Joan B Soriano, Chandrashekhar T Sreeramareddy, Jeffrey D Stanaway, Vasiliki Victorovich Stathopoulou, Caitlyn Steiner, Mark Ali Stokes, Muawiyah Beshir Sufiyan, Soumya Vittal Swaminathan, Bryan L Sykes, Rafael Tabarés-Seisdedos, Jukka S Takala, Roberto Talongwa, Mohammed Tarawneh, Mohammad Tavakkoli, Mohamad-Hani Temsah, Abdullah Sulieman Terkawi, Ruoyan R A Tobe-Gai, Bach Xuan Tran, Christopher Troeger, Thomas R Truelsen, Stefanos Tyrovolas, Kingsley Nnanna Ukwaja, Eduardo A Undurraga, Job F M van Boven, Tommi Vasankari, Narayanaswamy J Venketasubramanian, Vasiliy Vlassov, Stein Emil Vollset, Theo Vos, Tolassa Wakayo, Yuan-Pang Wang, Elisabete Weiderpass, Robert Tchivo Weintraub, Andrea Werdecker, Ronny Westerman, Tissa Wijeratne, Charles Shey Shey Wiysonge, Abdulhalik Workicho, Denis Xavier, Qingyang Le Xiao, Gelin Xu, Bereket Yakob, Yuichiro Yano, Hassen Hamid Yimam, Naohiro Yonemoto, Marcel Yotebieng, Mustafa Younis, Zoubida Zaidi, Taddese R Zerfu, Anthony Lin Zhang, and Xueying Zhang.

#### [Developing methods or computational machinery](#)

Ashkan Afshin, Alireza Ahmadi, Miloud Taki Eddine Aichour, Tahiya Alam, Christine Allen, Aleksandra Barac, Katherine Battle, James R Bennett, Samir Bhatt, Donal Bisanzio, Lemma Negesa Bulto Bulto, Blair Bumgarner, Ewan Cameron, Austin Carter, Daniel Casey, Fiona J Charlson, Devasahayam Jesudas Christopher, Cyrus Cooper, Louisa Degenhardt, Daniel Dicker, Lucas Earl, Kara Estep, Farshad Farzadfar, Christina Flitzmaurice, Abraham D Flaxman, Tahvi Frank, Maya Fraser, Emmanuela Gakidou, Audra L Gold, Max Griswold, Nathaniel J Henry, Peter J Hotez, Xie Rachel Kulikoff, Michael Kutz, Hmwe H Kyu, Qing Lan, Paul H Lee, Darya Li Kappe, Xiaofeng Liang, Rafael Lozano, Timothy C D Lucas, Emilie R Maddison, Deborah Carvalho Malta, Madeline McGaughey, Anoushka Millel, Alireza Mohammadi, Ali Huyen Mokdad, Chloe Morozoff, Christopher J L Murray, Mohsen Naghavi, Grant Nguyen, Emma Nichols, Liane Ong, Katherine Paulson, David M Pigott, Christine Pinho, Goura Kishor Rath, Jürgen Rehm, Robert Reiner, Gregory A Roth, Joseph Salama, Joshua A Salomon, Damian Santomauro, Maheswar

Satpathy, Naris Silpakit, David L Smith, Vinay Srinivasan, Jeffrey D Stanaway, Caitlyn Steiner, Bryan Strub, Patrick J Sur, Roberto Tchio Talongwa, Mohammad Tavakkoli, Alex H Thompson, Christopher Troeger, Rachel L Updike, Theo Vos, Andrea Werdecker, Ronny Westerman, and Hassen Hamid Yimam.

#### [Applying analytical methods to produce estimates](#)

Ashkan Afshin, Fares Alahdab, Tahiya Alam, Syed Danish Ali, Christine Allen, Azmeraw T Amare, Solomon W Asgedom, Aleksandra Barac, Katherine Battle, Kelly Beinhoff, James R Bennett, Adugnaw Berhane, Samir Bhatt, Donal Bisanzio, Lemma Negesa Bulto Bulto, Blair Bumgarner, Ewan Cameron, Austin Carter, Daniel Casey, Fiona J Charlson, Devasahayam Jesudas Christopher, Danny Colombara, Cyrus Cooper, Louisa Degenhardt, Daniel Dicker, Dirk Douwes-Schultz, Michelle Echko, Holly E Erskine, Kara Estep, Christina Fitzmaurice, Abraham D Flaxman, Tahvi Frank, Maya Fraser, Emmanuela Gakidou, Peter W Gething, William W Godwin, Audra L Gold, Max Griswold, Gessesew Bugssa Hailu, Fei He, Nathaniel J Henry, Claudiu Herteliu, Peter J Hotez, Bogdan Vasile Ileanu, Caleb Mackay Salpeter Irvine, Catherine Johnson, Rajendra Kadel, Nicholas J Kassebaum, Daniel Kievlan, Yun Jin Kim, Xie Rachel Kulikoff, Michael Kutz, Hmwe H Kyu, Darya Li Kappe, Xiaofeng Liang, Angela Liu, Patrick Liu, Rafael Lozano, Timothy C D Lucas, Emilie R Maddison, Deborah Carvalho Malta, Helena Manguerra, Tsegahun Manyazewal, Laurie B Marczak, Ira Martopullo, Madeline McGaughey, Anoushka Milllear, Ali Huyen Mokdad, Sarah K Mollenkopf, Chloe Morozoff, Cliff Mountjoy-Venning, Christopher J L Murray, Mohsen Naghavi, Grant Nguyen, Emma Nichols, Felix Akpojene Ogbo, Helen E Olsen, Liane Ong, Katherine Paulson, David M Pigott, Christine Pinho, Caroline Purcell, Zane Rankin, Goura Kishor Rath, Sarah E Ray, Robert Reiner, Mohammad Sadegh Rezai, Gregory A Roth, Joseph Salama, Joshua A Salomon, Maheswar Satpathy, Masood Ali Shaikh, Alison Smith, Mari Smith, Vinay Srinivasan, Jeffrey D Stanaway, Caitlyn Steiner, Patrick J Sur, Roberto Tchio Talongwa, Ornwipa Thamsuwan, Katie E Thomas, Alex H Thompson, Christopher Troeger, Derrick Tsoi, Kingsley Nnanna Ukwaja, Rachel L Updike, Theo Vos, Tolassa Wakayo, Daniel J Weiss, Andrea Werdecker, Ronny Westerman, Tissa Wijeratne, Gelin Xu, Hassen Hamid Yimam, and Zoubida Zaid.

#### [Providing critical feedback on methods or results](#)

Amanuel Alemu Abajobir, Cristiana Abbafati, Kaja M Abbas, Semaw Ferede Abera, Olatunji Adetokunboh, Ashkan Afshin, Anurag Agrawal, Aliasghar Ahmad Kiadaliri, Alireza Ahmadi, Muktar Beshir Ahmed, Amani Nidhal Aichour, Ibtihel Aichour, Miloud Taki Eddine Aichour, Fares Alahdab, Ziyad Al-Aly, Khurshid Alam, Noore Alam, Tahiya Alam, Kefyalew Addis Alene, Reza Alizadeh-Navaei, Juma M Alkaabi, Peter Allebeck, Ubai Alsharif, Khalid A Altirkawi, Nelson Alvis-Guzman, Azmeraw T Amare, Erfan Amini, Walid Ammar, Yaw Ampem Amoako, Nahla Anber, Catalina Liliana Andrei, Sofia Androudi, Hossein Ansari, Carl Abelardo T Antonio, Palwasha Anwari, Johan Ärnlöv, Al Artaman, Krishna Kumar Aryal, Hamid Asayesh, Solomon W Asgedom, Tesfay Mehari Atey, Leticia Avila-Burgos, Euripide Frinel G Arthur Avokpaho, Ashish Awasthi, Beatriz Paulina Ayala Quintanilla, Tesleem Kayode Babalola, Umar Bacha, Aleksandra Barac, Miguel A Barboza, Suzanne L Barker-Collo, Simón Barquera, Lars Barregard, Lope H Barrero, Bernhard T Baune, Neeraj Bedi, Ettore Beghi, Kelly Beinhoff, Michelle L Bell, Adugnaw Berhane, Eduardo Bernabé, Balem Demtsu Betsu, Mircea Beuran, Samir Bhatt, Boris Bikbov, Donal Bisanzio, Rupert R A Bourne, Nicholas J K Breitborde, Lemma Negesa Bulto Bulto, Blair Bumgarner, Zahid A Butt, Rosario Cárdenas, Juan Jesus Carrero, Daniel Casey, Carlos A Castañeda-Orjuela, Ferrán Catalá-López, Fiona J Charlson, Chioma Ezinne Chibueze, Odgerel Chimed-Ochir, Vesper Hichilombwe Chisumpa, Devasahayam Jesudas Christopher, Liliana G Ciobanu, Massimo Cirillo, Aaron J Cohen, Danny Colombara, Cyrus Cooper, Benjamin C Cowie, Michael H Criqui, Lalit Dandona, Rakhi Dandona, Paul I Dargan, José

das Neves, Kairat Davletov, Barbora de Courten, Louisa Degenhardt, Selina Deiparine, Kebede Deribe, Amare Deribew, Subhojit Dey, Daniel Dicker, Eric L Ding, Shirin Djalalinia, Huyen Phuc Do, David Teye Doku, Dirk Douwes-Schultz, Tim R Driscoll, Manisha Dubey, Ziad Ziad El-Khatib, Christian Lycke Ellingsen, Ahmadali Enayati, Holly E Erskine, Sharareh Eskandarieh, Alireza Esteghamati, Kara Estep, André Faro, Farshad Farzadfar, Seyed-Mohammad Fereshtehnejad, Joao C Fernandes, Alize J Ferrari, Tesfaye Regassa Feyissa, Irina Filip, Florian Fischer, Abraham D Flaxman, Nataliya Foigt, Maya Fraser, Nancy Fullman, Thomas Fürst, João M M Furtado, Emmanuela Gakidou, Alberto L Garcia-Basteiro, Teshome Gebre, Gebremedhin Berhe Gebregergs, Tsegaye Tewelde Gebrehiwot, Delelegn Yilma Gebremichael, Ricard Genova-Maleras, Hailay Abrha Gesesew, Peter W Gething, Paramjit Gill, Giorgia Giussani, Audra L Gold, Philimon N Gona, Sameer Vali Gopalani, Hebe N Gouda, Alessandra Carvalho Goulart, Rajeev Gupta, Tanush Gupta, Vipin Gupta, Juanita A Haagsma, Nima Hafezi-Nejad, Alemayehu Desalegne Hailu, Gessesew Bugssa Hailu, Randah Ribhi Hamadeh, Mitiku Teshome Hambisa, Samer Hamidi, Mouhanad Hammami, Yuantao Hao, Hilda L Harb, Habtamu Abera Hareri, Mohammad Sadegh Hassanvand, Rasmus Havmoeller, Simon I Hay, Ileana Beatriz Heredia-Pi, Claudiu Herteliu, Nobuyuki Horita, H Dean Hosgood, Sorin Hostiuc, Peter J Hotez, Damian G Hoy, Kim Moesgaard Iburg, Bogdan Vasile Ileanu, Asnake Ararsa Irenso, Kathryn H Jacobsen, Nader Jahanmehr, Mihajlo B Jakovljevic, Mehdi Javanbakht, Sudha P Jayaraman, Panniyammakal Jeemon, Vivekanand Jha, DQenny John, Catherine Johnson, Sarah Charlotte Johnson, Jost B Jonas, Mikk Jürisson, Rajendra Kadel, Amaha Kahsay, Ritul Kamal, André Karch, Seyed M Karimi, Chante Karimkhani, Amir Kasaeian, Nigussie Assefa Kassaw, Nicholas J Kassebaum, Srinivasa Vittal Katikireddi, Norito Kawakami, Peter Njenga Keiyoro, Chandrasekharan Nair Kesavachandran, Yousef Saleh Khader, Young-Ho Khang, Ardeshir Khosravi, Jagdish Khubchandani, Daniel Kim, Yun Jin Kim, Ruth W Kimokoti, Yohannes Kinfu, Niranjana Kissoon, Mika Kivimaki, Ann Kristin Knudsen, Jacek A Kopec, Ai Koyanagi, Kristopher J Krohn, Barthelémy Kuate Defo, G Anil Kumar, Pushpendra Kumar, Michael Kutz, Hmwe H Kyu, Dharmesh Kumar Lal, Nkurunziza Lambert, Qing Lan, Van C Lansingh, Anders Larsson, Paul H Lee, James Leigh, Janni Leung, Miriam Levi, Yongmei Li, Darya Li Kappe, Xiaofeng Liang, Misgan Legesse Liben, Yang Liu, Rakesh Lodha, Giancarlo Logroscino, Alan D Lopez, Stefan Lorkowski, Paulo A Lotufo, Rafael Lozano, Stefan Ma, Erlyn Rachelle King Macarayan, Marek Majdan, Azeem Majeed, Reza Malekzadeh, Rajesh Malhotra, Deborah Carvalho Malta, Tsegahun Manyazewal, Chabila C Mapoma, Laurie B Marczak, Desalegn Markos, Jose Martinez-Raga, Francisco Rogerlândio Martins-Melo, Ira Martopullo, Colm McAlinden, John J McGrath, Toni Meier, Kidanu Gebremariam Meles, Peter Memiah, Ziad A Memish, Melkamu Merid Mengesha, Desalegn Tadesse Mengistu, Bereket Gebremichael Menota, George A Mensah, Atte Meretoja, Tuomo J Meretoja, Ted R Miller, Shawn Minnig, Mojde Mirarefin, Erkin M Mirrakhimov, Shiva Raj Mishra, Alireza Mohammadi, Shafiu Mohammed, Ali Huyen Mokdad, Sarah K Mollenkopf, Mariam Molokhia, Lorenzo Monasta, Maziar Moradi-Lakeh, Paula Moraga, Chloe Morozoff, Kalayu Birhane Mruts, Kate Muller, Christopher J L Murray, Kamarul Imran Musa, Jean B Nachega, Mohsen Naghavi, Aliya Naheed, Vinay Nangia, Bruno Ramos Nascimento, Jamal T Nasher, Gopalakrishnan Natarajan, Ionut Negoii, Josephine Wanjiku Ngunjiri, Cuong Tat Nguyen, Grant Nguyen, Quyen Le Nguyen, Trang Huyen Nguyen, Dina Nur Anggraini Ningrum, Vuong Minh Nong, Jean Jacques Noubiap, Felix Akpojene Ogbo, Anselm Okoro, Andrew Toyin Olagunju, Bolajoko Olubukunola Olusanya, Jacob Olusegun Olusanya, John Nelson Opio, Eyal Oren, Alberto Ortiz, Erika Ota, Mahesh PA, Rosana E Pacella, Smita Pakhale, Adrian Pana, Basant Kumar Panda, Songhomitra Panda-Jonas, Eun-Kee Park, Scott B Patten, George C Patton, Deepak Paudel, David M Pereira, Fernando Perez-Ruiz, Norberto Perico, Aslam Pervaiz, Michael Robert Phillips, David M Pigott, Dietrich Plass, Suzanne Polinder, Maarten J Postma, Farshad Pourmalek, Mostafa Qorbani, Amir Radfar, Vafa Rahimi-Movaghar, Mahfuzar



Rahman, Mohammad Hifz Ur Rahman, Rajesh Kumar Rai, Chhabi Lal Ranabhat, Zane Rankin, Puja C Rao, Goura Kishor Rath, Salman Rawaf, Sarah E Ray, Jürgen Rehm, Robert Reiner, Giuseppe Remuzzi, Satar Rezaei, Mohammad Sadegh Rezai, Luca Ronfani, Gholamreza Roshandel, Gregory A Roth, George Mugambage Ruhago, Rizwan S A, Perminder S Sachdev, Mahdi Safdarian, Sare Safi, Saeid Safiri, Rajesh Sagar, Ramesh Sahathevan, Joseph Salama, Payman Salamati, Joshua A Salomon, Abdallah M Samy, Maria Dolores Sanchez-Niño, Damian Santomauro, Itamar S Santos, Milena M Santric Milicevic, Benn Sartorius, Maheswar Satpathy, Monika Sawhney, Maria Inês Schmidt, Ione J C Schneider, Sam Schulhofer-Wohl, Aletta E Schutte, David C Schwebel, Falk Schwendicke, Sadaf G Sepanlou, Masood Ali Shaikh, Mansour Shamsipour, Morteza Shamsizadeh, Sheikh Mohammed Shariful Islam, Jayendra Sharma, Rajesh Sharma, Jun She, Sara Sheikhbahaei, Muki Shey, Chloe Shields, Rahman Shiri, Ivy Shiue, Haitham Shoman, Mark G Shrim, Inga Dora Sigfusdottir, Jasvinder A Singh, Eirini Skiadaresi, Alison Smith, Badr H A Sobaih, Reed J D Sorensen, Joan B Soriano, Chandrashekhar T Sreeramareddy, Jeffrey D Stanaway, Vasiliki Stathopoulou, Nicholas Steel, Caitlyn Steiner, Sabine Steinke, Mark Andrew Stokes, Mark Strong, Muawiyah Babale Sufiyan, Bruno F Sunguya, Soumya Swaminathan, Bryan L Sykes, Rafael Tabarés-Seisdedos, Santosh Kumar Tadakamadla, Ken Takahashi, Jukka S Takala, Roberto Tchio Talongwa, Nuno Taveira, Teketo Kassaw Tegegne, Arash Tehrani-Banihashemi, Mohamad-Hani Temsah, Abdullah Sulieman Terkawi, JS Thakur, Kavumpurathu Raman Thankappan, Alex H Thompson, Alan J Thomson, Amanda G Thrift, Ruoyan Tobe-Gai, Roman Topor-Madry, Miguel Tortajada-Girbés, Jeffrey Allen Towbin, Bach Xuan Tran, Christopher Troeger, Thomas Truelsen, E Murat Tuzcu, Kingsley Nnanna Ukwaja, Eduardo A Undurraga, Olalekan A Uthman, Benjamin S Chudi Uzochukwu, Job F M van Boven, Tommi Vasankari, Narayanaswamy Venketasubramanian, Francesco S Violante, Vasilij Victorovich Vlassov, Stein Emil Vollset, Theo Vos, Tolassa Wakayo, Mitchell T Wallin, Yuan-Pang Wang, Elisabete Weiderpass, Robert G Weintraub, Daniel J Weiss, Andrea Werdecker, Ronny Westerman, Harvey A Whiteford, Tissa Wijeratne, Belete Getahun Woldeyes, Charles D A Wolfe, Abdulhalik Workicho, Denis Xavier, Gelin Xu, Mohsen Yaghoubi, Bereket Yakob, Mehdi Yaseri, Hassen Hamid Yimam, Naohiro Yonemoto, Marcel Yotebieng, Mustafa Z Younis, Zoubida Zaidi, Elias Asfaw Zegeye, Zerihun Menlkalew Zenebe, Taddese Alemu Zerfu, and Anthony Lin Zhang.

#### [Drafting the work or revising is critically for important intellectual content](#)

Amanuel Alemu Abajobir, Cristiana Abbafati, Foad Abd-Allah, Semaw Ferede Abera, Victor Aboyans, Olatunji Adetokunboh, Ashkan Afshin, Aliasghar Ahmad Kiadaliri, Alireza Ahmadi, Muktar Beshir Ahmed, Fares Alahdab, Khurshid Alam, Noore Alam, Tahiya Alam, Juma M Alkaabi, Ala'a Alkerwi, Peter Allebeck, Nelson Alvis-Guzman, Azmeraw T Amare, Erfan Amini, Yaw Ampem Amoako, Nahla Anber, Hjalte H Andersen, Sofia Androudi, Palwasha Anwari, Johan Ärnlöv, Hamid Asayesh, Solomon W Asgedom, Tesfay Mehari Atey, Leticia Avila-Burgos, Euripide Frinel G Arthur Avokpaho, Ashish Awasthi, Aleksandra Barac, Miguel A Barboza , Suzanne L Barker-Collo, Lope H Barrero, Bernhard T Baune, Neeraj Bedi, Kelly Beinhoff, Yannick Béjot, Bayu Begashaw Bekele, Michelle L Bell, Isabela M Bensenor, Adugnaw Berhane, Balem Demtsu Betsu, Mircea Beuran, Boris Bikbov, Donal Bisanzio, Lemma Negesa Bulto Bulto, Blair Bumgarner, Zahid A Butt, Lucero Cahuana-Hurtado, Josip Car, Juan Jesus Carrero, Carlos A Castañeda-Orjuela, Ferrán Catalá-López, Fiona J Charlson, Devasahayam Jesudas Christopher, Massimo Cirillo, Aaron J Cohen, Danny Colombara, Cyrus Cooper, Benjamin C Cowie, Michael H Criqui, Lalit Dandona, Rakhi Dandona, José das Neves, Dragos V Davitoiu, Barbora de Courten, Louisa Degenhardt, Selina Deiparine, Kebede Deribe, Amare Deribew, Subhojit Dey, Huyen Phuc Do, David Teye Doku, Tim R Driscoll, Manisha Dubey, Bruce Bartholow Duncan, Holly E Erskine, Sharareh Eskandarieh, Alireza Esteghamati, Kara Estep, André Faro, Seyed-Mohammad Fereshtehnejad, Joao C Fernandes, Alize J

Ferrari, Irina Filip, Samuel Finegold, Florian Fischer, Christina Filtzmaurice, Abraham D Flaxman, Nancy Fullman, Thomas Fürst, João M M Furtado, Emmanuela Gakidou, Teshome Gebre, Gebremedhin Berhe Gebregergs, Tsegaye Tewelde Gebrehiwot, Johanna M Geleijnse, Ricard Genova-Maleras, Hailay Abrha Gesesew, Peter W Gething, Paramjit Gill, Richard F Gillum, Ibrahim Abdelmageem Mohamed Ginawi, Audra L Gold, Philimon N Gona, Sameer Vali Gopalani, Alessandra Carvalho Goulart, Tanush Gupta, Juanita A Haagsma, Nima Hafezi-Nejad, Alemayehu Desalegne Hailu, Randah Ribhi Hamadeh, Mitiku Teshome Hambisa, Alexis J Handal, Graeme J Hankey, Habtamu Abera Hareri, Mohammad Sadegh Hassanvand, Rasmus Havmoeller, Ileana Beatriz Heredia-Pi, Masako Horino, Nobuyuki Horita, H Dean Hosgood, Sorin Hostiuc, Peter J Hotez, Damian G Hoy, Asnake Ararsa Irengo, Kathryn H Jacobsen, Mihajlo B Jakovljevic, Sudha P Jayaraman, Panniyammakal Jeemon, Sarah Charlotte Johnson, Jost B Jonas, Mikko Jürisson, Rajendra Kadel, Ritul Kamal, André Karch, Seyed M Karimi, Chante Karimkhani, Amir Kasaeian, Nicholas J Kassebaum, Srinivasa Vittal Katikireddi, Norito Kawakami, Peter Njenga Keiyoro, Chandrasekharan Nair Kesavachandran, Yousef Saleh Khader, Ejaz Ahmad Khan, Young-Ho Khang, Abdullah Tawfih Abdullah Khoja, Mohammad Hossein Khosravi, Jagdish Khubchandani, Christian Kieling, Daniel Kim, Yun Jin Kim, Niranjana Kisson, Mika Kivimäki, Ann Kristin Knudsen, Jacek A Kopec, Parvaiz A Koul, Ai Koyanagi, Kristopher J Krohn, Barthélemy Kuate Defo, G Anil Kumar, Michael Kutz, Hmwe H Kyu, Dharmesh Kumar Lal, Ratilal Laloo, Van C Lansingh, Anders Larsson, Janni Leung, Miriam Levi, Darya Li Kappe, Xiaofeng Liang, Misgan Legesse Liben, Giancarlo Logroscino, Alan D Lopez, Paulo A Lotufo, Rafael Lozano, Mohammed Magdy Abd El Razek, Marek Majdan, Reza Majdzadeh, Azeem Majeed, Reza Malekzadeh, Deborah Carvalho Malta, Tsegahun Manyazewal, Laurie B Marczak, Desalegn Markos, Francisco Rogerlândio Martins-Melo, Colm McAlinden, Madeline McGaughey, Toni Meier, Melkamu Merid Mengesha, Desalegn Tadesse Mengistu, George A Mensah, Atte Meretoja, Tuomo J Meretoja, Ted R Miller, Shiva Raj Mishra, Karzan Mohammad, Shafiq Mohammed, Ali Huyen Mokdad, Glen Liddell D Mola, Mariam Molokhia, Marcella Montico, Paula Moraga, Chloe Morozoff, Shane D Morrison, Kate Muller, Christopher J L Murray, Gudlavalleti Venkata Satyanarayana Murthy, Kamarul Imran Musa, Jean B Nachega, Mohsen Naghavi, Bruno Ramos Nascimento, Ionut Negoii, Josephine Wanjiku Ngunjiri, Cuong Tat Nguyen, Quyen Le Nguyen, Trang Huyen Nguyen, Vuong Minh Nong, Jean Jacques N Noubiap, Felix Akpojene Ogbo, In-Hwan Oh, Anselm Okoro, Andrew Toyin Olagunju, Bolajoko Olubukunola Olusanya, Jacob Olusegun Olusanya, John Nelson Opio, Eyal Oren, Alberto Ortiz, Erika Ota, Mahesh PA, Rosana E Pacella, Basant Kumar Panda, Songhomitra Panda-Jonas, Scott B Patten, George C Patton, David M Pereira, Fernando Perez-Ruiz, Aslam Pervaiz, Dietrich Plass, Maarten J Postma, Mostafa Qorbani, Amir Radfar, Vafa Rahimi-Movaghar, Mahfuzar Rahman, Rajesh Kumar Rai, Goura Kishor Rath, Salman Rawaf, Sarah E Ray, Robert Reiner, Satar Rezaei, Mohammad Sadegh Rezaei, Luca Ronfani, Gholamreza Roshandel, Gregory A Roth, Dietrich Rothenbacher, Perminder S Sachdev, Mahdi Safdarian, Saeid Safiri, Rajesh Sagar, Joseph Salama, Joshua A Salomon, Abdallah M Samy, Juan Ramon Sanabria, Maria Dolores Sanchez-Niño, Damian Santomauro, Itamar S Santos, Milena M Santric Milicevic, Maheswar Satpathy, Monika Sawhney, Maria Inês Schmidt, Aletta E Schutte, David C Schwebel, Falk Schwendicke, Sadaf G Sepanlou, Masood Ali Shaikh, Morteza Shamsizadeh, Sheikh Mohammed Shariful Islam, Jayendra Sharma, Sara Sheikhbahaei, Mika Shigematsu, Rahman Shiri, Shreya Shirude, Ivy Shiue, Haitham Shoman, Mark G Shrimme, João Pedro Pedro Silva, Jasvinder A Singh, Eirini Skiadaresi, Joan B Soriano, Chandrashekhar T Sreeramareddy, Jeffrey D Stanaway, Dan J Stein, Caitlyn Steiner, Sabine Steinke, Mark Strong, Muawiyah Babale Sufiyan, Bryan L Sykes, Roberto Tchito Talongwa, Nuno Taveira, Mohamad-Hani Tamsah, JS Thakur, Ornwipa Thamsuwan, Alan J Thomson, Roman Topor-Madry, Miguel Tortajada-Girbés, Bach Xuan Tran, E Murat Tuzcu, Stefanos Tyrovolas, Kingsley Nnanna Ukwaja, Eduardo

A Undurraga, Olalekan A Uthman, Job F M van Boven, Tommi Vasankari, Narayanaswamy Venketasubramanian, Francesco S Violante, Vasiliy Victorovich Vlassov, Stein Emil Vollset, Theo Vos, Tolassa Wakayo, Yuan-Pang Wang, Elisabete Weiderpass, Robert G Weintraub, Andrea Werdecker, Brian Whetter, Harvey A Whiteford, Tissa Wijeratne, Charles Shey Shey Wiysonge, Denis Xavier, Gelin Xu, Bereket Yakob, Yuichiro Yano, Hassen Hamid Yimam, Naohiro Yonemoto, Seok-Jun Yoon, Maysaa El Sayed Zaki, and Zerihun Menlkalew Zenebe.

#### [Extracting, cleaning, or cataloging data; designing or coding figures and tables](#)

Olatunji Adetokunboh, Sneha Aiyar, Christine Allen, Catalina Liliana Andrei, Megha Arora, Aleksandra Barac, James R Bennett, Adugnaw Berhane, Lemma Negesa Bulto Bulto, Blair Bumgarner, Daniel Casey, Devasahayam Jesudas Christopher, Dirk Douwes-Schultz, Lucas Earl, Kara Estep, Carla Sofia e Sa Farinha, Samuel Finegold, Maya Fraser, Nancy Fullman, Maurice Giroud, Ellen M Goldberg, Max Griswold, Jamie Hancock, Chad Ikeda, Sarah Charlotte Johnson, Laura Kemmer, Mohammad Hossein Khosravi, Daniel Kievlan, Barthelemy Kuate Defo, Michael Kutz, Misgan Legesse Liben, Emilie R Maddison, Tsegahun Manyazewal, Ira Martopullo, Madeline McGaughey, Melkamu Merid Mengesha, Anoushka Millea, Ted R Miller, Alireza Mohammadi, Cliff Mountjoy-Venning, Christopher J L Murray, Mohsen Naghavi, Quyen Le Nguyen, Emma Nichols, Liane Ong, Mahesh PA, Katherine Paulson, Max Petzold, David M Pigott, Christine Pinho, Zane Rankin, Goura Kishor Rath, Sarah E Ray, Payman Salamati, Maheswar Satpathy, Shreya Shirude, Naris Silpakit, Alison Smith, Chandrashekhar T Sreeramareddy, Caitlyn Steiner, Bryan Strub, Michelle Subart, Patrick J Sur, Roberto Tchio Talongwa, Mohammad Tavakkoli, Alex H Thompson, Anna Torre, Bach Xuan Tran, Christopher Troeger, Brian Whetter, Rachel Woodbrook, Gelin Xu, and Ben Zipkin.

#### [Managing the overall research enterprise](#)

Ashkan Afshin, Tahiya Alam, Kelly Beinhoff, Blair Bumgarner, Kara Estep, Abraham D Flaxman, Emmanuela Gakidou, Audra L Gold, Simon I Hay, Peter J Hotez, Chantal Huynh, Laura Kemmer, Darya Li Kappe, Xiaofeng Liang, Alan D Lopez, Rafael Lozano, Deborah Carvalho Malta, Ali Huyen Mokdad, Chloe Morozoff, Kate Muller, Christopher J L Murray, Mohsen Naghavi, Helen E Olsen, Puja C Rao, Gregory A Roth, Joseph Salama, Joshua A Salomon, Katya Anne Shackelford, Chloe Shields, Shreya Shirude, Amber Sligar, Mari Smith, Jeffrey D Stanaway, Caitlyn Steiner, Theo Vos, and Andrea Werdecker.

#### [Did not provide authorship contribution information](#)

Sibhatu Biadgilign, Tea Lallukka, Julio C Montañez Hernandez, Minh Nguyen, Martin A Pletcher, Saeid Shahraz, and Sanjay Zodpey.

## Section 1. GBD Overview

### Section 1.1. Locations of the Analysis

The locations included in GBD 2016 have been arranged into a set of hierarchical categories composed of seven super-regions and a further nested set of 21 regions containing 195 countries and territories. The locations for which GBD estimated global, regional, and national cause-specific mortality and years of life lost (YLLs) have not expanded following GBD 2015. New subnational locations estimated for GBD 2016 are the local government areas of England and provinces of Indonesia. Subnational assessments for GBD 2016 include 26 states and one federal district for Brazil, 33 provinces and municipalities for China, nine regions and 150 local government areas for England, 31 states and union territories by urbanicity for India, 34 provinces for Indonesia, 47 prefectures for Japan, 47 counties for Kenya, 31 states and one federal district for Mexico, two areas for Sweden, nine provinces for South Africa, 13 states for the Kingdom of Saudi Arabia, and 50 states and one federal district for the United States. Combined, there are a total of 335 locations at the first subnational unit level. Included in subnational Level 1 locations are countries that have been subdivided into the first subnational level, such as states or provinces, for the GBD analysis; subnational Level 2 only applies to India and England. For this paper we present data at the national and territory level.

### Section 1.2. Time Period of the Analysis

A complete set of cause-specific mortality and years of life lost (YLL) numbers and rates were computed for the years 1980–2016.

All GBD 2016 results and online data visualisations are available at <http://vizhub.healthdata.org/gbd-compare> with access to results for all GBD metrics.

### Section 1.3. Statement of GATHER Compliance

This study complies with the Guidelines for Accurate and Transparent Health Estimates Reporting (GATHER) recommendations. We have documented the steps involved in our analytical procedures and detailed the data sources used in compliance with the Guidelines for Accurate and Transparent Health Estimates Reporting (GATHER). See Appendix Table 1 for the GATHER checklist.

The GATHER recommendations may be found here: <http://gather-statement.org/>

### Section 1.4. List of abbreviations

5q0: probability of death from birth to age 5 years

45q15: probability of death from age 15 years to 60 years

Adol: adolescent

Air poll mort: mortality attributable to air pollution

ANC: antenatal care

ART: antiretroviral therapy

BMD: bone mineral density

BMI: body mass index

BTL: basic tabulation list

CBH: complete birth history

CD4: type of T lymphocyte used as an indicator of immune function

CDR: crude death rates

CHERG: Child Health Epidemiology Research Group

CKD: chronic kidney disease

CKD-DM: chronic kidney disease deaths attributable to diabetes

COD: causes of death

CODEm: cause of death ensemble modelling

COPD: chronic obstructive pulmonary disease

CR: cancer registry

CRA: comparative risk assessment

CSA: childhood sexual abuse

CSMR: cause-specific mortality rate

CVD: cardiovascular disease

DAH: development assistance for health

DALYs: disability-adjusted life-years

DHS: Demographic and Health Survey

DPT: diphtheria-pertussis-tetanus

DRI: data representativeness index

DSP: Disease Surveillance Points

ELISA: enzyme-linked immunosorbent assay

EMR: excess mortality rate

EPEC: enteropathogenic *E. coli*

EPP: Estimation and Projection Package

ETEC: enterotoxigenic *E. coli*

FAO: Food and Agriculture Organization

GATHER: Guidelines for Accurate and Transparent Health Estimates Reporting

GBD: Global Burden of Diseases, Injuries, and Risk Factors Study

GEMS: Global Enteric Multicenter Study

GHDx: Global Health Data Exchange

GPRM: Global Price Reporting Mechanism

HAQ: Healthcare Access and Quality

HH air poll: household air pollution

Hib: *Haemophilus influenzae* type B

HIV CDR: Crude death rate due to HIV/AIDS

IAEG-SDGs: Inter-Agency and Expert Group on Sustainable Development Goal Indicators

IARC: International Agency for Research on Cancer

ICD: International Classification of Disease

IER: integrated exposure response

IHD: ischemic heart disease

IHR: International Health Regulations

ILO: International Labour Organization

IOTF: International Obesity Task Force

IPUMS: Integrated Public Use Microdata Series

IPV: intimate partner violence

ISIC: International Standard Industrial Classification

JMP: Joint Monitoring Programme

LDI: lag distributed income per capita

LRI: lower respiratory infection

MAP: Malaria Atlas Project

MCCD: Medical Certification of Causes of Death

MCEE: Maternal and Child Epidemiology Estimation group

MDG: Millennium Development Goal

MICS: Multiple Indicator Cluster Surveys

MIR: mortality/incidence ratio

MM: maternal mortality

MMR: maternal mortality ratio

MMS: Maternal Mortality Surveillance

Mort: mortality

NCD: non-communicable disease

NN mort: neonatal mortality

NTDs: neglected tropical diseases

Occ risk burden: burden attributable to occupational risks

ODA: Official development assistance

OECD: Organisation for Economic Co-operation and Development

PAF: population attributable fraction

PCV3: Three-dose pneumococcal conjugate vaccine

PM2.5: particulate matter <2.5 $\mu$ m in diameter

RCT: randomised controlled trial

RMSE: root mean square error

RSV: respiratory syncytial virus

SBA: skilled birth attendance

SBH: summary birth history

SBP: systolic blood pressure

SCD(R): Survey of Causes of Death (Rural)

SD: standard deviation

SDG: Sustainable Development Goal

SDI: Socio-demographic Index

SDSN: Sustainable Development Solutions Network

SEER: Surveillance, Epidemiology, and End Results Program

SEV: summary exposure value

SIR: smoking impact ratio

SRS: Sample Registration System

SSB: sugar-sweetened beverages

ST-GPR: spatiotemporal Gaussian process regression

TAC: TaqMan Array Card

TB: tuberculosis

TMREL: theoretical minimum-risk exposure level

TRIPS: Agreement on Trade-Related Aspects of Intellectual Property Rights

U5MR: under-5 mortality rate

UHC: universal health coverage

UI: uncertainty interval

UN: United Nations

UNICEF: United Nations Children's Fund

VA: verbal autopsy

VR: vital registration

WaSH: water, sanitation, and hygiene

WFS: World Fertility Surveys

WHO: World Health Organization

YLDs: years lived with disability

YLLs: years of life lost

### Section 1.5. GBD results overview

Results from the Global Burden of Disease Study (GBD 2016) are now measured in terabytes. Results are available in an interactive data downloading tool on the Global Health Data exchange (GHDx). The tool contains the complete set of results from all summary papers; however, specialised tables from the papers are available as separate entries in the GHDx as were made available for GBD 2015.

The current version of the data download tool is available in the GHDx and contains core summary results for the Global Burden of Disease Study 2016 (GBD 2016): <http://ghdx.healthdata.org/gbd-results-tool>. The core summary results include deaths, YLLs, YLDs, and DALYs. It includes data for causes, risks, cause-risk attribution, aetiologies, and impairments.

In the GBD 2016 version, the tool also contains measures such as prevalence and incidence as well as rate of change data. Data above a certain size cannot be viewed online but can be downloaded. Depending on the size of the download, users may need to enter an email address and a download location will be sent to them when the files are prepared.

### Section 1.6. Data input sources overview

GBD 2016 incorporated a large number and wide variety of input sources to estimate mortality, causes of death and illness, and risk factors for 195 countries and territories from 1990 to 2016. These input sources are accessible through an interactive citation tool available in IHME's GHDx.

Users can retrieve citations for a specific GBD component, cause or risk, and location by choosing from the available selection boxes. They can then view and access GHDx records for input sources and export a CSV file that includes the GHDx metadata, citations, and information about where the data were used in GBD. Additional metadata for each input source are available through the citation tool, as required by the GATHER statement.

The citation tool is accessible through the GHDx at <http://ghdx.healthdata.org/global-burden-disease-study-2016>



## Section 1.7. Funding Sources

Funding for this research was provided by the Bill & Melinda Gates Foundation.

## Section 2: GBD 2016 causes of death database

### 2.1 Background

Appendix Figures 1 and 2 show the high-level view of data inputs, analytical steps, and outputs of the cause of death analysis frame. Section 2 of this appendix provides details on each step in the development of the causes of death database as illustrated in Appendix Figure 1. The complexity of the overall process can be usefully divided into three broad phases: data inputs on the event of death going into the cause of death database that are analysed using CODEm; data inputs on precursors to death that are modelled through a variety of strategies; and the integration of these streams of analysis into a single set of cause of death estimates by age, sex, year, and geography with uncertainty through the CodCorrect algorithm. The process for cancer and for HIV/AIDS is somewhat different and is described in more detail in Section 3.

### 2.2 Cause of death data identification

#### 2.2.1 Overview of data types

The cause of death database contains seven types of data sources: vital registration, verbal autopsy, cancer registry, police records, sibling history, surveillance, and survey/census. The highest-quality data will have detailed characteristics of each demographic group and detailed causes of death across the time series. Data from countries with complete vital registration systems are considered to be high-quality. For countries with incomplete vital registration systems, vital statistics for causes of death can be supplemented with other data types to provide cause-specific estimates.

#### 2.2.2 ICD detail

A majority of the cause of death data is vital registration data obtained from the WHO Mortality Database, country-specific mortality databases operated by official offices, or provided by trusted country collaborators. It is considered to be the highest-quality data, as it is the most comprehensive. Each cause is coded directly to the most detailed cause of death when possible, whereas cause codes in ICD-tabulated data are coded to aggregated cause groups. The cause of death database contains 12,879 location-years of detailed data from 1980 to 2016, which includes underlying causes of death coded with 3-5 digit codes, by country, year, sex, and age groups. Detail causes are coded to one of the following ICD detail coding systems: ICD8, ICD9, or ICD10. Each coding system has a similar cause hierarchy and cause list that has continually developed over time. ICD10 is the current standard and the most exhaustive cause list. Within the cause lists, 5-digit codes are truncated to 4-digit codes to condense the cause lists. Updates to ICD detail occur biannually as WHO releases new versions or as country collaborators provide additional data. Updates to data from WHO increasingly include ICD10 cause of death data, as it is the most current classification of cause of death, while updates to ICD8 and ICD9 detailed lists are less common. In the case of overlapping data, preference is given to data from pre-determined country collaborators, which are updated annually.

#### 2.2.3 ICD tabulations lists

The ICD tabulation lists include the ICD8 List A (ICD8A), ICD9 Basic Tabulation List (BTL), ICD10

Mortality Tabulation, Russia Tabulation list, and India Medical Certification of Cause of Death (MCCD). These data sources make up 1,729 location-years from 1980 to 2016 in the cause of death database. All are condensed versions of the ICD9 and ICD10 detail lists, with some differences in the format of cause lists depending on the data source. ICD8A, ICD9 BTL, and ICD10 Mortality Tabulation cause of death are assigned to subtotal groups, referred to as chapters, and cause groups respective to ICD detail groups. Additionally ICD9 BTL includes ICD9 detail codes for some cancers and a custom tabulation scheme for the former USSR countries. The Russia Tabulation lists and India MCCD cause lists each have custom nomenclatures based on ICD detail cause codes.

Two of the drawbacks in data using tabulation lists are discrepancies in the accuracy of death counts and lack of detail to due to aggregated cause groups. There are instances where the sum of deaths in chapter subtotals are not equal to the sum of cause groups within the chapter. To account for any missing or duplicate deaths reported within the cause groupings, death counts are systematically adjusted, by calculating the differences between subtotals and sub-causes within the cause groups. Any differences are assigned to a remainder cause group. To account for the lack of cause code detail, select cause groups are disaggregated (Step 1.1) to create a complete cause list. Updates to ICD Tabulation lists obtained from WHO occur less frequently compared to ICD detailed lists, as more countries are reporting deaths in ICD detail. In instances of overlapping data, preference is given first to data from country collaborators' data from WHO, then to ICD detail data from WHO, before choosing to use ICD tabulation lists.

#### China DSP/China CDC

The two primary sources of data for China are surveillance data from the China Disease Surveillance Points (DSP) system and vital registration data collected by the Chinese Center for Disease Control and Prevention (CDC). In the China DSP data, deaths were reported across 145 disease surveillance points used from 1991 to 2003, 161 points used from 2004 to 2007, and 605 disease surveillance points from 2008 to 2015. While China DSP with ICD10 coding is considered sample vital registration data, it provides national coverage and cause detail. Thus it receives similar processing and treatment to the China CDC vital registration from 2008 to 2015. From 2008 to 2015, all of the deaths and cause of death information from the Disease Surveillance Points system and other system points throughout China were collected and reported via the Mortality Registration and Reporting System, an online reporting system of the Chinese CDC. The deaths in these data are reported at the strata level, a metric that is specific to China. Counties are stratified by urban and rural classification, but definitions of urbanity vary across counties. In Step 7 we use a method developed to scale up deaths from strata level to the province level.

#### India MCCD

The India Medical Certification of Cause of Death (MCCD) has data for the urban parts of the majority of the states and union territories beginning in 1980. Deaths reported in this data source have been medically certified and are considered vital registration data. The causes of death are reported in a tabulation list with a unique numbering scheme that conform to ICD9 and ICD10 detail codes, which must be disaggregated. MCCD is state-split to fill in data gaps (Step 1.2 State Splitting) prior to age-sex splitting.

Because SRS is widely considered a more credible assessment of causes of death in India, we chose to keep MCCD in only certain cases for modelling with CODEm. We preserved MCCD data in the database for two primary reasons. First, where the three midpoint years of SRS data resulted in the loss of a clear time trend, as was the case for maternal mortality, we chose to preserve MCCD in addition to SRS. Second, MCCD has advantage over SRS in cases where verbal autopsy is not a valid instrument for

ascertaining the cause of death, like encephalitis, dengue fever, and peptic ulcer disease – in these cases, we kept MCCD over SRS.

#### 2.2.4 Verbal autopsy

##### VA coded to ICD10 and VA coded to other lists

In countries without vital registration systems, verbal autopsy studies are a viable data source to inform cause of death. Data are obtained by trained interviewers who use a standardised questionnaire to ask relatives about the signs, symptoms, and demographic characteristics of recently deceased family members. Based on the answers to the questionnaires a cause of death is assigned.

Verbal autopsy data are highly heterogeneous: studies use different instruments, different cause lists from single causes to full ICD cause lists, different methods for assigning cause of death based on a completed verbal autopsy, different recall periods, and different age groups, quite apart from cultural differences in the interpretation of specific questions. The validity of cause of death must be considered when mapping to a GBD cause. Verbal autopsies are likely accurate in assigning cause of death to road injury or homicide, but less accurate for causes requiring medical certification, such as cardiovascular causes. Studies can also occur once in a particular country or as part of an extended network, such as INDEPTH. INDEPTH is a continuous surveillance source with several Demographic Surveillance Systems sites that collect data which is coded to ICD detail causes.

##### INTERVA modelled VA

In previous years, INTERVA-modelled VA was excluded from our analysis. Verbal autopsies used in our analysis are non-INTERVA, as they use questionnaires and modules consistent with WHO standards. The Population Health Metrics Research Consortium (PHMRC) published a study that shows results of INTERVA-modelled VA are not compelling enough to be credible, and thus we have decided to exclude data for all causes due to low validations with the exception of injuries in Sub-Saharan Africa.<sup>1</sup> We lack data in sub-Saharan Africa and use INTERVA to fill in gaps and stabilise injuries patterns.

##### India SCD

Deaths reported in verbal autopsy studies in rural Indian states can be accounted for in the Survey of Causes of Death (SCD) from 1980 to 1994.<sup>2</sup> Data in the SCD were collected through a verbal autopsy survey from a sample of villages. To expand our estimates to more states and causes we used methods of state splitting post mapping to GBD causes (Step 1.2). For GBD 2016, the primary source of cause of death data for India was India SRS, described below. With the exception of select causes for which SCD data were a critical source in CODEm models, SRS data were used in place of SCD data for causes included in both databases.

##### India SRS

The SRS is a dual-record system wherein a resident part-time enumerator continuously records births and deaths in each household within the sample unit every month. A full-time SRS supervisor thereafter independently collects the vital events along with other related details for each of the preceding six month periods during the calendar year. The sample for SRS is drawn after each decennial census of India.

Starting in late 2002, each household in the SRS sampled unit in which a death occurred was visited by a trained SRS field staff and an interview of the nearest available relative of the deceased was conducted to collect details of the signs, symptoms and other relevant information related to that death using a verbal autopsy questionnaire. This information was subsequently coded by physicians to determine the

most likely underlying cause of death. Initially, two physicians independently assigned the underlying cause for each death to a three-character ICD10 code. Any difference between the two coders was resolved by reconciliation between them, and for persisting differences adjudication was done by a third physician coder.

## 2.2.5 Other data types

### Maternal mortality data

In locations with low-quality vital registration or no vital registration, maternal mortality metrics can be found in surveillance, surveys, census, and sibling history data sources. The best data have death counts due to maternal causes and the total number of deaths for women within the reproductive ages of 10 to 54 by year. If a data source is missing these components, it is necessary to create a complete cause list using live births and all-cause mortality deaths (Step 1.4).<sup>3</sup> Though death counts is the preferred metric, maternal mortality is often measured using maternal mortality ratio (MMR), which is easily converted to deaths using live births. An additional adjustment that must be applied to the China Maternal and Child Surveillance data is scaling data from the strata to the province level (Step 7).

### Surveys and censuses reporting fraction of deaths due to selected injuries

Surveys and censuses are often used in countries with less developed vital registration systems, or in countries with adequate vital registration these data sources are supplementary. Much like the verbal autopsies, the validity of cause of death is a concern due to lack of medical certification at the time of death. For these data sources we keep only causes related to maternal mortality and injuries. The remaining causes are accounted for as a remainder of total deaths in the sample size.

### Police records

In most countries, police and crime reports are an important source of information for some types of injury deaths, notably road injuries and interpersonal violence. Our police data come from reports on road traffic and crime trends. The police reports used in this analysis were obtained from published studies, national agencies, and institutional surveys such as the UN Crime Trends survey and United Nations Office on Drugs and Crime Global study on Homicides. We can assess whether police reports were likely to be complete and cover the entire country if police trends are close to trends seen in vital registration. Data are excluded in instances where police data for road traffic injuries are significantly lower than our vital registration. The threshold for exclusion is less than 80% of the cause fraction of the road traffic injuries in vital registration. Police data that meet our inclusion criteria and provide complete coverage are uploaded to the database for injuries causes.

## 2.2.6 Population-based cancer registries

### Cancer registries with incidence

Data on cancer incidence were sought from individual population-based cancer registries as well as from databases that include multiple registries, for example “Cancer Incidence in Five Continents” (CI5), NORDCAN, or EUREG. Cancer registries were identified through the membership list of the International Association of Cancer Registries (IACR), through the GBD collaborator network, or through the GHDx. Registries were excluded if they were not representative of the coverage population, if they did not contain incidence data tabulated by cancer site, if the data were limited to years prior to 1980, if the source did not provide details on the population covered, or if the list of cancer sites included was not comprehensive.

### Cancer registries with incidence and high-quality mortality data

In addition to incidence, some high-quality cancer registries also report cancer mortality data. These data were also extracted and used as inputs to the mortality-to-incidence model.

### 2.3 Step 1. Standardise input data

The input data to the cause of death (CoD) database are received in various formats and must be standardised to run through central CoD machinery to then upload to the database. Raw data inputs come from data sources such as mortality databases, literature reviews, or reports. Usable data sources must have a clear sample size of the number of deaths in the population and exhaustive cause lists. The complexity of the data cleaning process varies drastically across data sources. For vital registration micro-data with the location, age, sex, year, and ICD-coded cause of every death, very little effort is necessary to standardise it into a consistent structure. Other sources may require weeks of careful review to accurately extract scans of hardcover cause of death reports into spreadsheets that can be transformed and standardised.

At this point, data are assigned source identifiers so that they can be linked to the Global Health Data Exchange (GHDx) and cited appropriately. Any aggregate age and sex categories are flagged for age-sex splitting. The methods of cause-of-death assignment and data collection are reviewed to determine which source type to assign; for example, we distinguish sibling history data from surveys with a verbal autopsy module. Only data at the most detailed level of the Global Burden of Disease location hierarchy are used. Documentation from the source is reviewed to determine if the population is representative of the location or only a subset of the population in that location. Data sources representing a subset of the population are flagged as non-representative; this flag is used by CODEm to increase the variance associated with such data points.

Finally, diagnostics are reviewed at this stage to avoid sending cleaning errors downstream. We review cause-specific deaths for each demographic group to ensure the data are reasonable. For example, it is unlikely that male breast cancer deaths are higher than female breast cancer or deaths from neonatal causes occur in age groups over one year. All deaths totals are compared with the sum of cause-specific deaths to ensure the observed deaths are accounted for and sample size is complete.

#### Step 1.1 Disaggregation

Causes of death in tabulated vital registration data are condensed into aggregated groups, some of which can be mapped directly to GBD causes while other aggregated cause groups are not informative and cannot be mapped to GBD causes. To correct for this, aggregated causes were mapped and split onto multiple ICD8, ICD9 and ICD10 detail causes, or targets, based on the ICD groupings within the aggregated causes. ICD8, ICD9 and ICD10 detail codes serve as targets because they are the highest-quality vital registration data and enable the calculation of proportions used to split the aggregated cause data into detailed causes. The proportions of deaths from nearby countries within the super-region were used to fill in data gaps as they were likely to have similar cause of death trends.

We determined the targets based on detail causes missing from the tabulated cause list. For example, in ICD9 BTL, the tabulated cause list includes a viral diseases group. In the hierarchy of causes, this group consists of measles, yellow fever, encephalitis, hepatitis, rabies, other infectious diseases, garbage code, and remainder of viral diseases. We did not consider this list to be an exhaustive list of viral diseases based on the range of ICD detail codes given in the ICD9 BTL documentation. To make the cause list exhaustive and inclusive of other viral diseases, we split the remainder of the viral diseases group into other meningitis, other infectious diseases, herpes, dengue, other neglected tropical diseases, and garbage code. After a list of targets was determined, the aggregated deaths were disaggregated to the target causes using ICD8, ICD9, and ICD10 detail proportions generated at the super-region level for the corresponding sex and age groups across all years in the time series. For example, in ICD9 detail data, 54.8% of deaths in males in Latin America and the Caribbean within the target group for BTL Viral Diseases

were designated “other meningitis”, so 54.8% of deaths in the tabulated group “remainder of viral diseases”, were assigned to “other meningitis” for any country within that particular super-region. For any cause and demographic group where we lacked ICD detail, global proportions were used.

### Step 1.2 State splitting

Two sources for cause of death estimation in India are the Medical Certification of Causes of Death (MCCD) report, which reports medically certified deaths from health facilities in mostly urban areas<sup>4</sup>, and the Survey of Causes of Death (SCD), which collects information via verbal autopsy on about one-half of 1% of all rural deaths in India, based on populations living in about 1,300 primary health care centers spread throughout the country.<sup>5</sup> For both of these reports, data missingness impedes estimation of trends at the state level. We used a first-order, log-linear model of the four-way contingency table of deaths by sex, age, state, and year to estimate the missing state-years. We fit the model to all available data for MCCD and SCD separately for each cause, including state-specific all-age measurements and age-specific national measurements. From this, we produced estimates for each combination of sex, age, state, and year. We then used these estimates wherever the raw data did not include sex-, age-, and state-specific death counts.

For MCCD, the model was fit separately for ICD10- and ICD9-based reports using the tabulated cause list present in the data. In the SCD report, the model was fit for each GBD cause in the data. As data from the SCD reports were relatively sparse, the pooling of like causes together led to an improved model fit.

### Step 1.3 Calculate non-maternal deaths

In cases when maternal mortality metrics do not include both deaths due to maternal causes and deaths due to non-maternal causes for women of reproductive age, live births and all-cause mortality estimates can be used to calculate deaths. Many studies report maternal deaths as the maternal mortality ratio (MMR). MMR is the number of maternal deaths per 100,000 live births and can be used to calculate deaths when it has been derived from primary data and not estimated. Maternal deaths were calculated using MMR and live births; if live births were missing we substituted live birth estimates and used the following equation:

$$\text{Maternal deaths} = (\text{MMR}/100,000) * \text{Live births}$$

If a study was non-representative we extracted sample size and live births from that study. After maternal deaths were calculated, we used the difference from all-cause mortality estimates to determine non-maternal deaths.

A more accurate and data-inclusive method of calculating maternal and non-maternal deaths incorporates coverage and splits deaths for a range of years into individual years. If there were live births in the study we adjusted the coverage.

$$\text{Coverage} = \text{live births} / \text{GBD-estimated live births}$$

After coverage was calculated, totals deaths were scaled to be more representative. This gives a more accurate death count since the envelope assumes representative coverage. Using all-cause mortality as an all-cause total, non-maternal deaths were subsequently calculated.

$$\text{Maternal envelope with coverage} = \text{maternal envelope} * \text{coverage}$$

An additional adjustment can be applied to maternal data spanning over a range of consecutive years, which allows for more data inclusion. The years within specified year ranges are separated into individual

years, and total deaths within the year range were split between each individual year using the fixed proportions of maternal deaths from vital registration in that particular country. We only used vital registration to inform the proportions because it was both high-quality and representative.

#### 2.4 Step 2. Map to GBD cause list

In GBD 2016 we used 536 maps to translate causes found in the input data to the GBD 2016 cause list. This included 38 maps for vital registration data, 354 for verbal autopsy data sources, and 144 for other data types. The largest and most universal maps used were those for ICD9 and ICD10 detail vital registration data. The input data causes varied from 3-4 digit ICD codes to custom cause lists with cause names such as cholera or hepatitis. Our mapping process made it possible to compare these various data sources across demographic groups.

In GBD 2016, we developed additional maps to translate ICD codes found in the input data that are non-underlying causes to appropriate target codes based on the levels of the GBD cause list. These garbage codes were mapped to Levels 1-4 of the GBD cause list according to the following criteria:

1. Level 1 includes all garbage codes for which a Level 1 GBD cause cannot be directly assigned. For example, the underlying causes of sepsis or peritonitis, if not specified in the data, could be an injury, a non-communicable disease, or a type of communicable disease. In these cases, deaths will be redistributed across all three of these Level 1 causes. In addition, deaths coded to impossible or ill-defined causes of death, including senility and unspecified causes, fall into this category, as they will be redistributed onto all causes.
2. Level 2 includes all garbage codes that can be assigned to one specific Level 1 cause in the GBD cause list. This would include deaths coded to unspecified injuries (X59), which are redistributed onto all injuries.
3. Level 3 includes all garbage codes for which we know the Level 2 cause of death, and can redistribute onto Level 3 causes. This includes deaths coded to causes such as unspecified cardiovascular disease, which falls within the Level 2 cause cardiovascular diseases, as well as those coded to unspecified cancer site, which falls within the Level 2 neoplasms cause.
4. Level 4 includes all garbage codes for underlying causes of death that can be redistributed within a Level 3 cause. This includes garbage codes such as “unspecified stroke” or “unspecified road injuries.”

Appendix Table 3 shows the ICD10-detail and ICD9-detail codes included in the mapping of each GBD cause. This includes the ICD10-detail and ICD9-detail codes that were mapped to garbage Levels 1-4 as well.



### 2.5 Step 3. Age-sex splitting

Different sources, particularly verbal autopsy studies, report deaths for a wide range of age groups with varying intervals. For the analysis of causes of death, we mapped these different age intervals to the GBD standard set of age groups. The approach to undertake this mapping was the same as in the prior GBD studies, GBD 2015, GBD 2013, and GBD 2010.

In the process of assembling a consolidated demographic database, perhaps the most impairing source of inconsistency is the aggregation of age groups. It is conventional to report such data in broad age groupings such as “0-4, 5-14, 15-49,” or to report data with both sexes together. The issue of comparability between age-sex groups arose when assembling the GBD cause of death database. The compiled database included 22 distinct tabulation formats for infants and 141 distinct tabulation formats for non-infants. We developed a tool, which we call age-sex splitting, that takes aggregated age groupings, and likewise the “both sexes combined” grouping, and divides them into what their constituent age groups would likely have been using respective cause-specific and country-specific age distributions. The analytical framework for GBD includes three infant age categories: Early neonatal (0-6 days), late neonatal (7-27 days), and post-neonatal (28 days to 1 year), and 17 non-infant age categories starting with age 1-4 years, then proceeding in five-year age groups until the terminal age group of 95+. We treat unknown ages and sexes in the same manner we treated the “all ages combined” age category and “both sexes combined” sex group. Through this process, we were able to directly compare all data sources on even terms.

The approach to age splitting is based on the following formula. The key assumption underlying this formula is that the relative risk of death by age group compared to a reference age group is invariant across populations. While this assumption is likely violated in specific cases, there is a strong biologically based pattern of the relative risk of death for a cause by age that is observed for most causes. The basic formula is as follows:

$$D_a = R_a N_a \left( \frac{D_a^{a+x}}{\sum_a^{a+x} (R_a N_a)} \right)$$

Where:

$D_a$  = the number of deaths from a cause in age group  $a$

$R_a$  = the relative risk of death in age group  $a$  compared to a reference group

$N_a$  = the country-year-sex-specific population in age group  $a$

$D_a^{a+x}$  = the number of deaths in the age group  $a$  to  $a+x$

With the assumption of invariant relative risks of death by age with respect to a reference age group, this equation can be used, along with population distribution by age, to split an aggregate number of deaths for the age groups  $a$  to  $a+x$  into specific deaths for each age group within the aggregate interval.

In some cases, deaths are reported for an aggregate age group for both sexes combined. The task in this case is more complicated, but the same principle can be applied. In this case we assumed that the relative risks of death by and sex are constant.

$$D_{as} = R_{as} N_{as} \left( \frac{D_{as}^{a+x,s}}{\sum_a^{a+x} (R_{as} N_{as})} \right)$$

Where:

$D_{as}$  = the number of deaths from a cause in age group  $a$ , sex  $s$

$R_{as}$  = the relative risk of death in age group  $a$  compared to a reference group for sex  $s$

$N_{as}$  = the country-year-sex-specific population in age group  $a$  for sex  $s$

$D_a^{a+x,s}$  = the number of deaths in the age group  $a$  to  $a+x$  for sex  $s$

This equation can be used to split data aggregated over age and sex. The assumption, however, of invariant relative risks across age and sex is a stronger assumption. Fortunately, data pooled across sexes are less common in the published or unpublished cause of death data.

The relative risk of death in a particular age group for a given sex is derived from the global distribution of cause-specific mortality rates found in available vital registration data. Location-years from the following code systems are used, provided they report the requisite age- and sex-detail: ICD7, ICD8, ICD9 BTL, ICD10 tabulated, ICD9, and ICD10. Upon compiling these data, we mapped them to GBD causes, and aggregated up to cause Level 3. This is the level at which a particular cause is split – that is, any daughter cause of a Level 3 parent is split using the age distribution of that parent (so, chronic kidney disease due to diabetes would be split using the age pattern of chronic kidney disease).

We next adjusted separately for estimated adult and child vital registration completeness. Location- year-age-sex-specific deaths and population were then aggregated across all location-years, in order to produce cause-specific mortality rates by age and sex. These were used to determine the risk of death at any age relative to any reference age group.

## 2.6 Step 4. Correct age-sex violations

Occasionally, data sources will include deaths by a cause for which there is medical consensus that death is impossible for the sex and age. For example, there may be some number of deaths due to cervical cancer in males, or deaths due to maternal causes in ages under 10. We have constructed a conservative list of age-sex restrictions. When deaths violate these restrictions, we redistribute them proportionally onto all causes.

### Step 4.1 GBD age-sex restrictions by cause

All restrictions are included in Appendix Table 4, Restrictions on age and sex by cause for GBD 2016.

## 2.7 Step 5. Redistribution

A crucial aspect of enhancing the comparability of data for cause of death is to deal with uninformative, so-called garbage codes. Garbage codes are codes to which deaths were assigned that cannot or should not be considered as the underlying cause of death, for example: heart failure, ill-defined cancer site, senility, ill-defined external causes of injuries, and septicaemia. The methods for redistributing these garbage-coded deaths were outlined in detail in Naghavi et al<sup>6</sup>, and the underlying algorithm for redistributing deaths assigned to these codes has not changed since GBD 2013.

### Step 5.1 Redistribute HIV-related garbage codes

Due to the disparate nature of HIV/AIDS mortality across space and time, dynamic redistribution of HIV/AIDS-related garbage codes was needed. To inform this redistribution, we generated target proportions for each garbage group by age band (Under 1 month, 1-59 months, 5-19 years, 20-49 years, 50-59 years, 60-69 years, 70-79 years, and 80+ years), five-year time interval, and sex. The garbage groups will either target HIV or a remainder target. The allotment of deaths to either of these is based on the regional increase in the mortality rate of all codes in the group relative to the rates seen in 1980–1984 – an increase greater than 5% is assumed to be HIV/AIDS-related, and the proportion of those deaths exceeding 5% are redistributed to HIV/AIDS. Any increase  $\leq 5\%$  is then assigned to the remainder target.

### Step 5.2 Regress garbage codes versus non-garbage codes

As in GBD 2015, the statistical analysis used to determine proportions for garbage code redistribution for ill-defined cancer sites, ill-defined external causes of injury, unspecified stroke, heart failure, hypertension, and atherosclerosis was based on the approach outlined by Ahern et al.<sup>7</sup> For each redistribution package, we defined the “universe” of data as all deaths coded to either the package’s garbage codes or the package’s redistribution targets for each country, year, age, and sex. We then ran a regression based on the following equation, separately for each target group and sex:

$$TG_{crt} = \alpha + \beta_1 Gar_{crt} + \beta_2 Age_{crt} Gar_{crt} + \theta_r Gar_{crt} + \gamma_r + \varepsilon_{ct}$$

$TG_{crt}$  = percentage of deaths within the given garbage code’s universe which were coded to a given target group, by country

$Gar_{crt}$  = percentage of deaths within the given garbage code’s universe which were coded to a given set of garbage codes

$\alpha$  = constant

$\beta_1$  = slope coefficient describing the association between  $Gar_{crt}$  and  $G_{crt}$

$\beta_2$  = slope coefficient describing the association between the interaction  $Age_{crt} Gar_{crt}$  and  $G_{crt}$

$\gamma_r$  = region-specific random intercept (or super-region if the random effect on region is not significant)

$\theta_r$  = region-specific random slope (or super-region if the random effect on region is not significant)

$\varepsilon_{ct}$  = standard error, normally distributed and calculated by bootstrapping

This regression was adjusted from GBD 2013 to include fixed effects on the interaction of garbage and age to ensure smooth age patterns. We made this decision after investigating diagnostic visualisations that showed unlikely gaps between proportions assigned to different age groups.

Once proportions were produced for each country, sex, age, and target group, certain adjustments were made to conform our packages to the best medical evidence available. In some cases, we implemented

restrictions on the proportions that the regressions could yield. For example, we did not allow any redistribution onto Chagas disease outside of Latin America and the Caribbean, or suicide under the age of 15. In other cases, we capped the proportion for some targets to the level that would be produced from proportional redistribution; for example, haemoglobinopathies and haemolytic anaemias were restricted to the level of proportional redistribution in the redistribution of left heart failure. Occasionally, further adjustments were made on a case-by-case basis per country, age, sex, and target group to suppress the impact of outliers based on existing epidemiological evidence and expert judgment.

#### Development of an algorithm for redistribution of garbage codes based on multiple cause of death data

Multiple cause of death data are a form of individual record causes of death data which include an underlying cause of death along with other causes in the death chain, including intermediate and immediate causes. By analysing this type of data, we can sometimes find the true underlying cause of death in other cause of death data where the underlying cause is a garbage code or a misassigned cause of death.

For GBD 2016, this approach was implemented in redistribution for a few select causes. One example of this approach is seen in the correction of the misassignment of deaths due to drug overdoses to unintentional poisoning. Figure A below shows the number of deaths due to unintentional poisoning as an underlying cause of death in the United States in 2000 through 2013 by age. The accompanying table (Table A) shows the fraction of deaths assigned to unintentional poisoning as an underlying cause of death in the United States by substance or drug based on the other causes in the death chain. More than 90% of these types of poisonings are due to exposure to narcotics, psychodysleptics, and other drugs, specified or unspecified. More than 97% of these poisonings by substance or drug occurred in ages 15–65. It is clear that these are not cases of accidental ingestion of substances, but rather that the substance has been deliberately ingested, with unintentional poisoning occurring.

Figure A. Unintentional poisoning deaths in the United States, by age and year

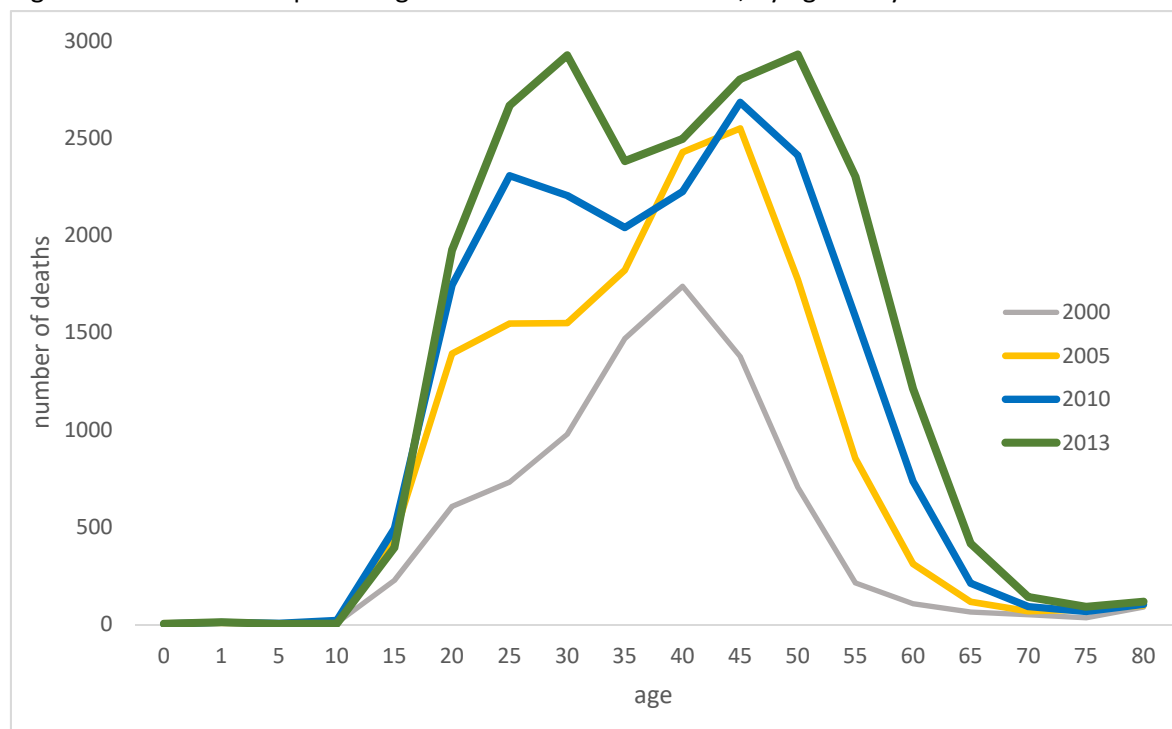

Table A. Fraction of the deaths assigned to unintentional poisoning in the United States by substance or drug

| ICD 10 code | ICD 10 definition                                                                                                                            | Fraction |
|-------------|----------------------------------------------------------------------------------------------------------------------------------------------|----------|
| X42         | Accidental poisoning by and exposure to narcotics and psychodysleptics not elsewhere classified                                              | 47.7%    |
| X44         | Accidental poisoning by and exposure to other and unspecified drugs, medicaments and biological substances                                   | 42.9%    |
| X41         | Accidental poisoning by and exposure to antiepileptic, sedative-hypnotic, anti-parkinsonism and psychotropic drugs, not elsewhere classified | 8.4%     |
| X49         | Accidental poisoning by and exposure to other and unspecified chemicals and noxious substances                                               | 0.5%     |
| X40         | Accidental poisoning by and exposure to non-opioid analgesics, antipyretics and anti-rheumatics                                              | 0.5%     |
| X43         | Accidental poisoning by and exposure to other drugs acting on the autonomic nervous system                                                   | 0.1%     |

Using multiple cause of death records for the United States, Mexico, Brazil, and Australia from 1980 to 2014, we selected all deaths with underlying causes coded to X40–X44 and X49. Table B, below, shows the combination of other potential causes that can be found in the multiple cause of death data for these underlying causes. Based on this table, we proportionally redistributed misassigned unintentional poisoning deaths to one of these causes. The main assumption behind this algorithm is the dominance of the fatality of some substances when considering a combination of drugs. Given the combination of different drugs and substances in these codes, opium is the main cause of fatality.<sup>8,9</sup> Other substances, like cocaine, methamphetamine, and alcohol with cannabis are less likely to be dominant in fatality.<sup>10</sup>

Table B. Algorithm for the selection and assignment of a substance or drug use cause of death for deaths coded to an underlying cause of unintentional poisoning using multiple cause of death data

| Selection Algorithm               |         |                                   |                        |                        |                                   |                                   |
|-----------------------------------|---------|-----------------------------------|------------------------|------------------------|-----------------------------------|-----------------------------------|
|                                   | Opioids | Cannabis                          | Cocaine                | Amphetamines           | alcohol                           | Psychoactive and psychedelic drug |
| Opioids                           | Opioids | Opioids                           | Opioids                | Opioids                | Opioids                           | Opioids                           |
| Cannabis                          | Opioids | Cannabis                          | Cocaine                | Amphetamines           | alcohol                           | Psychoactive and psychedelic drug |
| Cocaine                           | Opioids | Cocaine                           | Cocaine                | Amphetamines + Cocaine | Cocaine + alcohol                 | Cocaine                           |
| Amphetamines                      | Opioids | Amphetamines                      | Amphetamines + Cocaine | Amphetamines           | Amphetamines + alcohol            | Amphetamines                      |
| alcohol                           | Opioids | alcohol                           | Cocaine + alcohol      | Amphetamines + alcohol | alcohol                           | Psychoactive and psychedelic drug |
| Psychoactive and psychedelic drug | Opioids | Psychoactive and psychedelic drug | Cocaine                | Amphetamines           | Psychoactive and psychedelic drug | Psychoactive and psychedelic drug |

For example, if the multiple cause of death data show that 40% of deaths include opioid use disorders as an intermediate cause where the underlying cause is X40–X44, X49, the redistribution proportion for opioid use disorders will be exactly 40% due to the dominance of the fatality of opioid use disorders compared to other drugs in the above table. Similarly, because cannabis is not assumed to have dominance of fatality compared to any of the above drug use disorders, the proportion of X40–X44, X49 redistributed to cannabis use disorders was the percentage of deaths in the multiple cause of death data that had only cannabis use disorders as an intermediate cause and none of the other above causes. If 40% of deaths had cannabis use disorders listed in the intermediate cause list, but those 40% also had one or more of opioids, cocaine, amphetamines, alcohol, or psychoactive and psychedelic drugs, the redistribution proportion to cannabis use disorders would be 0%.

Multiple cause of death data were only available to us for the United States, Brazil, Mexico, and Australia. Because of this limited sample, we applied the result from multiple cause of death analysis from the United States to the United States and Canada, from Brazil and Mexico to Latin America and the Caribbean, and from Australia to Australia, New Zealand, and Western Europe. For other locations, we aggregated the results from the four countries and applied the aggregate pattern. We hope for increased availability of multiple causes of death data in future analyses in order to achieve a more precise distribution for more locations.

### Step 5.3 VA anemia adjustment

To compensate for the over-representative cause fractions from anemia found in verbal autopsy studies, we redistributed these deaths based on the causal attribution of severe anemia from the GBD 2013 study. The proportions were country-year-age-sex specific.

### 2.8 Step 6. HIV/AIDS misclassification correction

In many location-years, certain causes of death known to be comorbid with HIV/AIDS (eg, tuberculosis, other infectious diseases) are seen to have age patterns that diverge from those observed in location-years without widespread HIV epidemics, and are in fact more reflective of HIV mortality trends. In order to identify these instances, a global relative age pattern is generated using all VR deaths in countries with observed HIV prevalence less than 1% using the following:

$$RR_{asc} = R_{asc} / \bar{x}(R_{65sc}, R_{70sc}, R_{75sc})$$

Where  $RR_{asc}$  is the relative death rate for age group  $a$ , sex  $s$ , and cause  $c$ ;  $R_{asc}$  is the rate for that age group; and  $\bar{x}(R_{65sc}, R_{70sc}, R_{75sc})$  is the mean of the rates in ages 65–69, 60–74, and 75–79 for that sex and cause. This is preferable to comparing mortality rates because we are able to isolate divergence in age pattern while accounting for varying levels of overall mortality by fixing death rates to age groups that are unlikely to be confounded by the presence of HIV. Expected deaths for an identified cause were then determined to be:

$$ED_{lyasc} = \bar{x}(R_{ly65sc}, R_{ly70sc}, R_{ly75sc}) * p_{lasc} * RR_{asc}$$

Where  $ED_{lyasc}$  are deaths for location  $l$ , year  $y$ , age group  $a$ , sex  $s$ , and cause  $c$ ;  $\bar{x}(R_{ly65sc}, R_{ly70sc}, R_{ly75sc})$  is the mean of the rates for ages 65–69, 60–74, and 75–79 for that location-year-sex-cause;  $p_{lasc}$  is the population for that location-year-age-sex-cause; and  $RR_{asc}$  is the global standard relative rate determined in the previous step for that age-sex-cause. The expected deaths remain attributed to that particular cause, while the difference between observed and expected are reallocated to HIV/AIDS.

### 2.9 Step 7. Scale strata to province

Over time, a higher proportion of deaths have been registered in China through the expansion of the Disease Surveillance Point (DSP) system and provincial and county efforts to increase cause of death registration. With the expansion of coverage, it is possible that province aggregates do not accurately represent the population distribution between urban and rural areas in each year. For this reason, we stratified the data preparation by urban and rural status for each county within each province. Stratification was based on the median level of urbanisation across counties within each province as recorded in the 2010 China census. In the provinces of Tibet and Hainan, all counties were placed into one strata based on largely homogeneous urbanisation levels within each province. This yielded a total of 62 analytical province-strata. Macao and Hong Kong were not included in this stratification system as the VR systems there are independent from that on the mainland; no weighting scheme needs to be carried out in these complete VR systems with quality data on causes of death.

Within each province-strata, a larger proportion of deaths in-hospital might be reported than that of deaths outside of hospital because of the internet hospital reporting system. To avoid bias, we reweighted in-hospital and out-of-hospital deaths based on the age-sex-province-specific fraction of deaths in and out of hospital in the DSP system. DSP data have been used to establish these percentages because, in these communities, there is a concerted effort to identify all out-of-hospital deaths. Province-strata death rates are combined to produce overall province death rates by weighting each strata by population in each age-sex-year group. Province death rates are rescaled so that all-cause mortality equals the estimated death rate in each age-sex-year estimated in the life-table analysis. The Bayesian noise reduction algorithm was used to deal with zero counts and small number issues for rare causes.<sup>11</sup>

### 2.10 Step 8. Restrictions post-redistribution

Some causes of death can only be reliably assigned through an autopsy by a trained physician. For example, it is unlikely that a verbal autopsy would reliably distinguish between ischaemic and haemorrhagic stroke.

This step ensures that the detail of the cause list at this point in the data prep process is reasonable given the detail of the original data source and the methods by which the cause of death was assigned. Two primary corrections are applied. First, any cause which is purely an artifact of the redistribution machinery targeting too detailed a cause is aggregated up to the parent cause. Second, a “bridge map” is applied over a certain set of sources to ensure that these sources do not contain causes which could not reliably be determined by the methodology. These two corrections are applied to ICD9-BTL, ICD10-tabulated, USSR tabulated ICD9, India MCCD reports, China-DSP-tabulated-ICD9, India SCD reports, India SRS, and all verbal autopsy sources.

### 2.11 Step 9. Drop VR country years or mark as non-representative

Lozano and colleagues<sup>12</sup> describe the negative impact that low-completeness vital registration (VR) data can have on cause of death modelling for GBD 2010. In particular, in settings where a data source does not capture all deaths in a population, the cause composition of deaths captured might be different from those that are not. However, a completeness sensitivity test found that low-completeness VR data had little impact on the cause-specific mortality trends at the global level.

For GBD 2016, we investigated the impact of these data at the country and subnational levels using the more thorough diagnostic visualisations available to us. It was determined that these data produced unlikely trends in the models affected. Despite the minimal impact on global trends, better models were produced by eliminating or marking as non-representative data with extremely low completeness. VR completeness was estimated as the number of deaths registered divided by the number of deaths estimated in the GBD mortality envelope.

For this round, vital registration location-years with completeness below 50% were dropped, while location-years with completeness between 50% and 69% were marked as non-representative.

In addition, any country-year with a number of deaths registered to major garbage codes greater than 50% of the deaths registered was dropped.

### 2.12 Step 10. Cause aggregation

The cause list is organised in a top-down hierarchical format containing four levels. The first group, or Level 1, sums all causes. Following all cause-mortality are Level 2 causes, which include three broad groupings of causes of deaths: communicable, maternal, neonatal, and nutritional diseases; non-communicable diseases; and injuries. Within those Level 2 groupings are finer levels used for modelling. Level 3, or parent causes, are aggregated, meaning the mortality estimate for a parent cause in the hierarchy represents the sum of the causes under that rubric. Sub-causes within Level 3 causes – Level 4 – are more detailed. For example, the parent cause “intestinal infectious diseases” contains the three sub-causes: typhoid fever, paratyphoid fever, and other intestinal infectious diseases. Included in the parent cause estimate are deaths mapped directly to the parent and any Level 4 sub-causes. In data where there was not enough information to assign a Level 4 cause, we aggregated to the Level 3 parent cause. Exceptions to aggregating the Level 4 sub-causes to the parent are instances when certain sub-causes are not present. The United Nations Crime Trends police data only identify homicides, and aggregating homicides to injuries would not accurately represent all injuries.



### 2.13 Step 11. Remove shocks and HIV/AIDS maternal adjustments

For GBD 2016, CODEm models use an HIV/AIDS- and shock-free envelope. In order to be comparable, cause fractions must also be HIV/AIDS- and shock-free. Cause fractions were uploaded to the Causes of Death database as the number of deaths due to the cause over an adjusted sample in which the number of deaths due to HIV/AIDS, collective violence and legal intervention, and exposure to forces of nature were removed.

#### Step 11.1 Remove HIV/AIDS, shocks from denominator where HIV/AIDS in cause list

The first step to generate HIV- and shock-free cause fractions was to remove any deaths from the sample which were directly coded to HIV/AIDS, collective violence and legal intervention, or exposure to forces of nature. The resulting equation for a cause fraction uploaded to the database is simple:

$$CF_{l,t,a,x,c} = \frac{D_{l,t,a,x,c}}{D_{l,t,a,x} - D_{l,t,a,x,hiv} - D_{l,t,a,x,war} - D_{l,t,a,x,disaster}}$$

In this equation,  $CF_{l,t,a,x,c}$  is the cause fraction for a location (l), year (t), age (a), sex (x), and cause (c),  $D_{l,t,a,x,c}$  is the number of deaths observed in the sample for the same,  $D_{l,t,a,x}$  is the total number of deaths observed in the sample in the location, year, age and sex, and  $D_{l,t,a,x,hiv}$ ,  $D_{l,t,a,x,war}$ , and  $D_{l,t,a,x,disaster}$  are the number of deaths observed in the sample for HIV/AIDS, collective violence and legal intervention, and exposure to forces of nature, respectively.

Cause fractions for HIV/AIDS and shock causes were also uploaded to the database for use in separate estimation processes described by Wang et al.<sup>12</sup> In this case, cause fractions followed the standard equation, with variables following the same explanation as above:

$$CF_{l,t,a,x,c} = \frac{D_{l,t,a,x,c}}{D_{l,t,a,x}}$$

### Step 11.2 Remove HIV/AIDS deaths from maternal mortality sources

HIV-free cause fractions were also uploaded for sources on mortality due to maternal causes. In these cases, the sample of all deaths observed in the study is likely to contain some amount of deaths due to HIV/AIDS and shocks, but the sample only includes cause information on maternal deaths. To account for the presence of HIV/AIDS and shocks in the entire sample, we assumed the same proportion of total deaths due to HIV/AIDS by location, age, sex, and year as provided from the estimation of HIV/AIDS and all-cause mortality described by Wang et al.<sup>3</sup>

Maternal mortality studies were only corrected for HIV/AIDS if the sample of total deaths was provided in the data source. Where sources only provided the Maternal Mortality Rate (MMR), we applied the rate to the HIV- and shock-free envelope produced by the analysis described in Wang et al.<sup>3</sup> and thus did not need to adjust cause fractions at this point in the process.

Where a correction was applied, we applied the following equation:

$$CF_{l,t,a,x,mat} = D_{l,t,a,x,mat} * \frac{E[D_{l,t,a,x,hiv\_shock\_free}]}{E[D_{l,t,a,x}]}$$

In this equation, X is the resulting cause fraction due to maternal causes for the location (l), year (t), age (a), and sex (x);  $D_{l,t,a,x,mat}$  is the number of observed deaths in the sample due to maternal causes,  $E[D_{l,t,a,x}]$  is the GBD estimate of all-cause mortality in the location, year, age, and sex, and  $E[D_{l,t,a,x,hiv\_shock\_free}]$  is the GBD estimate of HIV- and shock-free mortality in the location, year, age, and sex.

### Step 11.3 HIV/AIDS correction of sibling history, census, and survey data

As described in our analysis from GBD 2013, many studies have failed to find increased mortality in HIV-positive pregnant mothers, but those who have advanced HIV are known to have increased baseline mortality. Prior to GBD 2013, we did not distinguish between deaths in HIV+ women that were caused by pregnancy and those for which the pregnancy was incidental to their death. In order to more explicitly quantify the contribution of pregnancy to death in HIV+ women, and therefore more accurately estimate the maternal death count, we completed two additional analyses for GBD 2013. First, we determined the population attributable fraction (PAF) of HIV/AIDS to pregnancy-related death. Second, we determined the proportion of pregnancy-related deaths in HIV-positive persons that are aggravated by pregnancy and are therefore by definition maternal deaths.

$$PAF = \frac{P(RR - 1)}{1 + P(RR - 1)}$$

Where PAF is the population attributable fraction, p denotes the prevalence of HIV in pregnancy, and RR is relative risk of mortality in HIV+ vs HIV- pregnant females.

To recap our analysis for GBD 2013, we used the paper published by Calvert and Ronsmans to identify sources<sup>13</sup> that could inform Step 1 of our HIV-correction analysis. We independently reviewed each of the component studies in Calvert and Ronsmans' review and extracted data directly, not from the systematic review paper. We identified only one additional study that was not used in Calvert and Ronsmans' analysis. We have, however, not used all the studies included in that review. Specific details are as follows: 1) Figueroa-Damian, et al. was excluded for not including any postpartum deaths at all. 2) In the case of Ryder, et al. and Zvandasara, et al. we excluded those deaths > 12 months after delivery.

3) We excluded the results from Chilongozi, et al. from the site that did not include any HIV-negative patients. 4) Leroy, et al. was not in the bibliography. We could not locate it for review so it was excluded. 5) Kourtis, et al. was extracted with adjustment of the denominator based on the average number of hospitalisations per delivery in each group. 6) Ticconi, et al. was excluded for being both non-representative and including subgroup data from mothers with malaria infection. A total of 21 sources were included in our analysis of the increased mortality risk of HIV+ versus HIV- women in pregnancy.<sup>10</sup> We performed DerSimonian-Laird random effects meta-analysis to derive a pooled estimate of RR of death during pregnancy given HIV positivity.<sup>14</sup> The pooled effect size was 6.40 (95% UI 3.98–10.29), which was then used to calculate an HIV PAF for each country, age group, and year. In order to determine the proportion of those HIV-related deaths that were attributable to maternal causes, we performed a second systematic literature review. This time we sought evidence for the excess mortality risk of pregnancy in those women who are already HIV-positive. Most studies have failed to find such an effect, but most also did not stratify their study population by stage of HIV or ART status. Only two studies did this stratification, with a pooled effect size of 1.13 (95% UI 0.73–1.77).

An updated literature review to inform the relative risk of mortality in pregnancy in HIV-positive versus HIV-negative women had 14 hits, but no usable sources. We completed this search on August 30, 2016, using the following two search strings:

```
( HIV[Title/Abstract] OR "Acquired Immunodeficiency Syndrome"[Title/Abstract] OR AIDS[Title/Abstract] )  
AND ( "pregnant"[Title/Abstract] OR "pregnancy"[Title/Abstract] OR "postpartum"[Title/Abstract] OR "post  
partum"[Title/Abstract] ) AND ( "mortality"[Title/Abstract] OR "death"[Title/Abstract] ) NOT "case report"  
AND "humans"[MeSH Terms] AND ( 2011/07/06[PDat] : 2016/12/31[PDat] )
```

Prevalence of HIV in pregnant women was calculated using UNAIDS' Spectrum model. Spectrum is a compartmental HIV progression model used to generate age-specific incidence, prevalence, and death rates from pre-calculated incidence curves and assumptions about intervention scale-up and local variation in epidemiology. For each location, we used UNAIDS' age-specific ratios of fertility in women living with HIV to fertility in women not living with HIV. In most locations, this ratio is assumed to be greater than one in women aged 15–24 and less than one and decreasing as age increases beyond 24. Since Spectrum assumes fertile ages of 15–49, we used the ratio of HIV prevalence in pregnant women to HIV prevalence in the general population at either end of that range to extend estimates to age bands 10–14 and 50–54.

Unlike GBD 2013, when we applied the PAF correction to the envelope of maternal deaths predicted by CODEm, we instead applied country-year-age-group-specific PAF to maternal mortality input data prior to modelling in CODEm. This ensured that both the numerator and denominator of all CF data were internally consistent in their exclusion of background HIV/AIDS mortality. The cause fractions for maternal deaths in sibling history, survey, and census data were therefore adjusted as follows:

$$CF_{l,t,a,x,mat_{adj}} = CF_{l,t,a,x,mat} * (1 - Prop_{hiv_{l,t,a,x}}) Prop_{hiv}$$

$$CF_{l,t,a,x} = PAF_{l,t,a,x,hivpos} * (1 - rr_{mat})$$

$$CF_{l,t,a,x,mat_{hiv}} = CF_{l,t,a,x,mat} * Prop_{maternalhiv_{l,t,a,x}}$$

$$Prop_{maternalhiv_{l,t,a,x}} = PAF_{l,t,a,x,hivpos} * rr_{mat}$$

*Where:*

$rr_{mat} = .13/1.13$  = The proportion of HIV/AIDS deaths during pregnancy that were exacerbated by the pregnancy.

$PAF_{l,t,a,x,hivpos}$  = The population-attributable fraction (PAF) that describes the percentage of all maternal deaths that were HIV-related for the location (l), year (t), age (a), and sex (x=Female))

$CF_{l,t,a,x,mat}$  = The proportion of deaths due to all maternal causes before HIV/AIDS correction for the location, year, age, and sex.

$Prop_{hiv_{l,t,a,x}}$  = The proportion of deaths in pregnancy for the location, year, age, and sex that are estimated to be incidental deaths due to HIV/AIDS, and therefore not a maternal cause of death.

$Prop_{maternalhiv_{l,t,a,x}}$  = The proportion of deaths in pregnancy for the location, year, age, and sex that are estimated to be HIV-positive and maternal deaths which are aggravated by HIV/AIDS.

$CF_{l,t,a,x,mat_{adj}}$  = The proportion of deaths due to maternal causes after the adjustment for the location, year, age, and sex.

$CF_{l,t,a,x,mat_{hiv}}$  = The proportion of deaths due to maternal deaths aggravated by HIV/AIDS after the adjustment for the location, year, age, and sex.

#### Step 11.4 HIV/AIDS correction of other maternal mortality data

Although there are a specific subset of codes in ICD10 that correspond to HIV/AIDS deaths aggravated by pregnancy, these codes are sparsely used and unreliable. We therefore adapted the method above to also correct VR and VA sources for the systematic exclusion of HIV-related maternal deaths. This correction was calculated in the same manner, using the same input data as above, with the only difference that HIV correction of VR and VA sources resulted in a net increase in maternal CF. Maternal deaths aggravated by HIV/AIDS are calculated as the following:

$$CF_{l,t,a,x,mathivvr} = CF_{l,t,a,x,matvr} * Prop_{maternalhivl,t,a,x}$$

$$Prop_{maternalhivl,t,a,x} = \frac{PAF_{l,t,a,x,hivpos} * rr_{mat}}{1 - PAF_{l,t,a,x,hivpos} * rr_{mat}}$$

Where all symbols are the same as described above.

#### 2.14 Step 12. Noise reduction

To deal with problems of zero counts in vital registration, verbal autopsy, cancer registries, or sibling histories for a given age group in a given year, we use a Bayesian noise-reduction algorithm. For this algorithm, we assume a normal prior and a normal data likelihood. We estimate the normal prior for a given country-series of data by estimating a negative binomial for the fraction of deaths in each age group due to each respective cause with dummy variables for age and year. With two notable exceptions (detailed below), these regressions are country-specific, so borrowing strength over age is only within a data type in a country. The variance of the prior,  $\tau^2$ , is estimated from the negative binomial regression, taking into account the variance-covariance matrix of the regression coefficients. For the data variance, we use the Wilson approximation which provides an estimate of  $\sigma^2$  even in cases with a zero count of cause-specific deaths. The posterior estimate for each data point is:

$$Mean = \left( \frac{\tau^2}{\tau^2 + \sigma^2} X + \frac{\sigma^2}{\tau^2 + \sigma^2} \mu \right)$$

$$Variance = \left( \frac{\tau^2 \sigma^2}{\tau^2 + \sigma^2} \right)$$

Where  $X$  is the mean of the data and  $\mu$  is the mean of the prior. This approach to noise reduction avoids the problem that zero counts in an  $\ln$  rates model or a logit cause fraction model will be dropped from the regression and lead to upward bias in the estimates. This is particularly important in two settings: high-income countries with small numbers of cause-specific deaths, and in the analysis of sibling history data where for any given age group in any given year the number of deaths reported in the survey that are pregnancy-related or the number of deaths from all causes in that age group may be small.

Regarding the exceptions to the regression, the first is that country-years with populations under 1 million are pooled with the region data in order to prevent overdispersion and provide a stronger signal. Additionally, verbal autopsy data diverge from the above description in two ways. First, all data for a

given super-region are pooled together and a study dummy variable is added, allowing for different studies and surveillance sites to borrow strength from one another within a super-region. Second, unless the data are part of a time series (eg, Matlab HDSS), there is no year component to the regression.

### 2.15 Step 13. COD database and outlier identification

Death rates for different causes of death generally have a stable age pattern. In large populations, these patterns will not change very rapidly over time. We can assume a relatively stable pattern in death rates for all causes except for some epidemic diseases and specific types of injuries. Rare causes in large populations and prevalent causes in small populations usually have stochastic patterns. To correct for these stochastic patterns we implement a noise-reduction process, explained in Step 12.

In vital registration data, we infrequently find one or more data points for specific geography/age/sex/years that lie very far from the stable pattern of death rates. In these situations, the model will usually ignore the data point(s). If the model fails to ignore these data, dramatic jumps or drops can occur in the death rates. When there is no logical explanation for variation in the death rates to this degree, we outlier the data point(s). The selection of data points to outlier occurs after data have been prepped for modelling, as well as during preliminary reviews of the models.

In non-vital-registration sources, data-collection methods and data quality can vary widely from source to source. Where data points in each age-sex-geography-year are very sparse, extreme data points can have a bad effect on regional estimation. In these situations we investigate the study's methods and outlier lower-quality data points.

Identifying outliers in the cause of death data occurs prior to finalisation of models for each cause. We do not automate the selection of outliers, but investigate the source of the offending data as well as reviewing other data sources for the same cause, geography, and year. Ultimately, outliers are identified based on the judgement of the modeller and senior faculty and are reversible to allow for decisions to be revisited in the future.

## 2.16 Causes of death data star rating calculation

GBD estimates are most accurate when computed with a full time series of complete vital registration with a low percentage of garbage codes. For GBD 2016, we developed a simple star-rating system from 0 to 5 to give a picture of the quality of data available in a given country over the full time series used in GBD estimates. Countries improve in the star rating as they increase availability, completeness, and detail of their mortality data and reduce the percentage of deaths coded to ill-defined garbage codes or highly aggregated causes.

To assign stars, we measure the proportion of deaths registered to a well-defined cause from 1980 to 2016. We call this proportion “percent well-certified”. We measure this proportion for each location-year of vital registration and each verbal autopsy study separately, and then combine the yearly measurements into a percent well-certified for the full time series.

For each year of vital registration, percent well-certified is:

$$pct_{wellcertified} = completeness * (1 - pct_{majgarbage})$$

Where:

$$completeness = \frac{registered\ deaths}{GBD\ mortality\ envelope}$$

$$pct_{majgarbage} = \frac{deaths\ coded\ to\ level\ 1\ or\ 2\ garbage\ or\ highly\ aggregated\ cause}{registered\ deaths}$$

Simplifying this equation, one can see that in this case “percent well-certified” is simply the number of deaths that are registered to a well-defined cause (those codes which are not Level 1 or 2 garbage or highly aggregated) divided by the GBD mortality envelope.

ICD10 and ICD9 codes assigned to Level 1 or 2 garbage can be found in Appendix Table 3.

For each verbal autopsy data source, percent well-certified is:

$$pct_{wellcertified} = VerbalAutopsyAdjustment * (1 - pct_{majgarbage})$$

Where:

$$VerbalAutopsyAdjustment = SubAdj * RegAdj * AgeSexCoverage$$

And:

SubAdj:

10% for subnationally representative studies, 100% for nationally representative studies. This adjustment, while arbitrary in its specific value, reflects the bias that can be associated with studies that only cover a potentially non-representative sample of a country’s population.

RegAdj:

64% for all verbal autopsy data sources. This accounts for the inaccuracy of verbal autopsy in assigning cause of death compared to medically verified vital registration.

The specific multiplier 0.64 is based on the chance-corrected concordance of Physician Certified Verbal Autopsy (PCVA) versus medical certification by the Population Health Metrics Research Consortium.<sup>15</sup>

Age-Sex Coverage:

The number of deaths estimated in the GBD mortality envelope for the ages and sexes in the study for the country and year divided by the number of deaths estimated in the GBD mortality envelope for the country and year. Studies that only cover children under 5 or maternal mortality, for example, will be highly discounted by this multiplier.

In the case of verbal autopsy, all garbage codes are considered ill-defined, as redistribution for verbal autopsy is highly imprecise. Causes such as “Injuries” or “Cancer” will also be included in major garbage percentage, as this percentage includes use of highly aggregated causes.

Once percent well-certified is calculated for each location-year of vital registration and each verbal autopsy study-year, we then combine these into one measurement for each five-year time interval and the full time series 1980–2016. For each five-year time interval, we take the maximum percent well-certified. Then for 1980–2016, we take the average of the maximum percentages well-certified for the seven five-year time intervals, including any five-year time interval where no data were available as a zero.

Once these values are calculated, we assign stars as follows:

5 stars: 85%–100% well-certified

4 stars: 65%–84% well-certified

3 stars: 35%–64% well-certified

2 stars: 10%–34% well-certified

1 star: >0%–9% well-certified

0 stars: No vital registration or verbal autopsy data available from 1980–2016

While stars are calculated for each five-year time interval as well as the full time series from 1980 to 2016, stars in the main text are presented for the full time series only.

Appendix Table 17 shows the percent well-certified, stars, data source, and underlying values for percent well certified used for each country and time interval.



## Section 3: Causes of death modelling methods

### 3.1 CODEm

#### 3.1.1 Overview of method

Cause of death ensemble modelling (CODEm) is the framework used to model most cause-specific death rates in the GBD.<sup>16</sup> It relies on four key components. First, all available data are identified and gathered to be used in the modelling process. Though the data may vary in quality, they all contain some signal of the true epidemiological process. Second, a diverse set of plausible models are developed to capture well-documented associations in the estimates. Using a wide variety of individual models to create an ensemble predictive model has been shown to outperform techniques using only a single model both in cause of death estimation<sup>16</sup> and in more general prediction applications.<sup>17,18</sup> Third, the out-of-sample predictive validity is assessed for all individual models, which are then ranked for use in the ensemble modelling stage. Finally, differently weighted combinations of individual models are evaluated to select the ensemble model with the highest out-of-sample predictive validity.

For some causes (see, for example, lower respiratory infections), there is evidence that the relationship between covariates and death rates might differ between children and adults. Separate models are therefore run for different age ranges when applicable. Additionally, separate models are developed for countries with extensive, complete, and representative vital registration (VR) for every cause to ensure that uncertainty can better reflect the more complete data in these locations.

#### 3.1.2 Model pool development

Because many factors may covary with any given cause of death, a range of plausible statistical models are developed for each cause. In the CODEm framework, four families of statistical models are used: linear mixed effects regression (LMER) models of the natural log of the cause-specific death rate, LMER models of the logit of the cause fraction, spatiotemporal Gaussian process regression (ST-GPR) models of the natural logarithm of the cause-specific death rate, and ST-GPR models of the logit of the cause fraction (see the 2x2 table in Foreman et al).<sup>16</sup> For each family of models, all plausible relationships between covariates and the response variable are identified. Because all possible combinations of selected covariates are considered for each family of models, multicollinearity between covariates may produce implausible signs on coefficients or unstable coefficients. Each combination is therefore tested for statistical significance (covariate coefficients must have a coefficient with p-value < 0.05) and plausibility (the coefficients must have the directions expected based on the literature). Only covariate combinations meeting these criteria are retained. This selection process is run for both cause fractions and death rates, then ST-GPR and LMER-only models are created for each set of covariates. For a detailed explanation of the covariate selection algorithm, see Foreman et al 2012.<sup>16</sup>

#### 3.1.3 Testing model pool on 15% sample

The performance of all models (individual and ensemble) is evaluated using out-of-sample predictive validity tests. Thirty percent of the data are excluded from the initial model fits. These individual model fits are evaluated and ranked using half of the excluded data (15% of the total), then used to construct the ensembles based on their performance. Data are held out from the analysis based on

the cause-specific missingness patterns for ages and years across locations. Out-of-sample predictive validity testing is repeated 20 times for each model, which has been shown to produce stable results.<sup>16</sup> These performance tests include the RMSE for the log of the cause-specific death rate, the direction of the predicted versus actual trend in the data, and the coverage of the predicted 95% UI.

#### 3.1.4 Ensemble development and testing

The component models are weighted based on their predictive validity rank in order to determine their contribution to the ensemble estimate. The relative weights are determined both by the model ranks and by a parameter  $\psi$ , whose value determines how quickly the weights taper off as rank decreases. The distribution of  $\psi$  is described in more detail in Foreman et al 2012.<sup>16</sup> A set of ensemble models is then created using the weights constructed from the combinations of ranks and  $\psi$  values. These ensembles are tested using the predictive validity metrics described in Section 3.1.3 on the remaining 15% of the data, and the ensemble with the best performance in out-of-sample trend and RMSE is chosen as the final model.

#### 3.1.5 Final estimation

Once a weighting scheme has been chosen, 1,000 draws are created for the final ensemble, with the number of draws contributed by each model proportional to its weight. The mean of the draws is used as the final estimate for the CODEm process, and a 95% uncertainty interval (UI) is created from the 0.025 and 0.975 quantiles of the draws. The validity of the UI can be checked via its coverage of the out-of-sample data; ideally, the 95% UI would capture 95% of these data. Higher coverage suggests that the UIs are too large, and lower coverage suggests overfitting.

#### 3.1.6 Selection of causes for which CODEm is used

CODEm is used to model 205 causes, described in detail below. However, it is unsuitable for use in modelling certain causes, including those with very low death counts, those where cause-specific death record availability is inadequate, or those for which there are marked biases or variability for cause of death certification over time that cannot be fully accounted for with the current garbage code redistribution algorithms. Criteria for causes where CODEm is not used are discussed in further detail in Section 3.2.

#### 3.1.7 Model-specific covariates

A table of CODEm covariates used, level of the covariate, and expected direction of the covariate by cause, sex, age, and location can be found in Appendix Table 6.

#### 3.1.8 Fit statistics for CODEm models

A table of CODEm predictive validity results by cause, sex, and, and location can be found in Appendix Table 7.

## 3.2 Causes modelled outside of CODEm

### 3.2.1 Overview

A number of causes required alternative modelling strategies to those used for CODEm, as they were not compatible with CODEm estimation infrastructure and processes. Such unsuitability included having very low death counts; inadequate availability of cause-specific death records; and marked biases or variability for cause of death certification over time which could not be fully accounted for with current garbage code redistribution algorithms. The inclusion of these causes in CODEm often renders its out-of-sample predictive validity testing, a key advantage of using CODEm for cause of death estimation, unstable, or CODEm simply fails to generate plausible mortality rates in the absence of enough VR or VA data. Due to increased data availability and redistribution algorithm refinements, we were able to incorporate several new causes, which were modelled separately for GBD 2013, into CODEm for this iteration of the GBD study; with each annual update of GBD, we aim to add more causes within the CODEm estimation space. For GBD 2016, we used alternative modelling approaches for these causes, including negative binomial models, natural history models, sub-cause proportion models, and prevalence-based models.

### 3.2.2 Negative binomial models

For ten rare causes of death, there were too few observed deaths in the cause of death database to produce stable estimates. For these causes, we ran negative binomial regression models with either a constant or constant multiplied by the mean assumption for the dispersion parameter, using reverse step-wise model building. We selected between the two model dispersion assumptions on the basis of best fit to the data, using the same method as GBD 2013. For GBD 2015 we also tested zero-inflated Poisson models for these rare causes of death, but rejected them after finding that they did not substantially affect the mean predictions but produced unrealistically large UIs. Descriptions of the modelling process for each of these causes follow.

### 3.2.3 DisMod-MR 2.1

Until GBD 2010, non-fatal estimates were based on a single data source on prevalence, incidence, remission, or a mortality risk selected by the researcher as most relevant to a particular location and time. For GBD 2010, we set a more ambitious goal: to evaluate all available information on a disease that passes a minimum quality standard. That required a different analytical tool that would be able to pool disparate information presented in varying age groupings and from data sources using different methods. The DisMod-MR 1.0 tool used in GBD 2010 evaluated and pooled all available data, adjusted data for systematic bias associated with methods that varied from the reference and produced estimates by world regions with uncertainty intervals. For GBD 2013, the improved DisMod-MR 2.0 had increased computational speed, allowing computations that were consistent between all disease parameters at the country rather than region level. The hundred-fold increase in speed of DisMod-MR 2.0 was partly due to a more efficient rewrite of the code in C++ but also by changing to a model specification using log rates rather than a negative binomial model used in DisMod-MR 1.0. In cross-validation tests, the log rates specification worked as well or better than the negative binomial specification.<sup>19</sup> For GBD 2015, the computational engine (DisMod-MR 2.1) remained substantively unchanged but we re-wrote the “wrapper” code that organised the flow of data and settings at each level of the analytical cascade. The sequence of estimation occurred at five levels: global, super-region,

region, country, and, where applicable, subnational locations (see flow diagram of DisMod-MR 2.1 cascade, below). The super-region priors were generated at the global level with mixed-effects, non-linear regression using all available data; the super-region fit, in turn, informed the region fit, and so on down the cascade. The wrapper gave analysts the choice to branch the cascade in terms of time and sex at different levels depending on data density. The default used in most models was to branch by sex after the global fit but to retain all years of data until the lowest level in the cascade. For GBD 2015, we generated fits for the years 1990, 1995, 2000, 2005, 2010, and 2015.

In updating the “wrapper,” we consolidated the code base into a single language, Python, to make the code more transparent and efficient and to better deal with subnational estimation. The computational engine is limited to three levels of random effects; we differentiated estimates at the super-region, region, and country levels. In GBD 2013, the subnational units of China, Mexico, and the UK were treated as “countries” such that a random effect was estimated for every location with contributing data. However, the lack of a hierarchy between country and subnational units meant that the fit to country data contributed as much to the estimation of a subnational unit as the fits for all other countries in the region. We found inconsistency between the country fit and the aggregation of subnational estimates when the country’s epidemiology varied from the average of the region. Adding an additional level of random effects required a prohibitively comprehensive rewrite of the underlying DisMod-MR engine. Instead, we added a fifth layer to the cascade, with subnational estimation informed by the country fit and country covariates, plus an adjustment based on the average of the residuals between the subnational unit’s available data and its prior. This mimicked the impact of a random effect on estimates between subnationals.

For GBD 2015 we improved how country covariates differentiate non-fatal estimates for diseases with sparse data. The coefficients for country covariates were re-estimated at each level of the cascade. For a given location, country coefficients were calculated using both data and prior information available for that location. In the absence of data, the coefficient of its parent location was used, in order to utilise the predictive power of our covariates in data sparse situations.

For GBD 2016, the DisMod-MR 2.1 tool was used. Updates included estimation of new age groups through the GBD 2016 terminal age group of 95+, in addition to the new locations added for the GBD 2016 cycle. Please see Appendix Figure 3 for details of the GBD 2016 DisMod-MR 2.1 analytical cascade.

### DisMod-MR 2.1 likelihood estimation

Analysts have the choice of using a Gaussian, log-Gaussian, Laplace, or log-Laplace likelihood function in DisMod-MR 2.1. The default log-Gaussian equation for the data likelihood is:

$$-\log[p(y_j|\Phi)] = \log(\sqrt{2\pi}) + \log(\delta_j + s_j) + \frac{1}{2} \left( \frac{\log(a_j + \eta_j) - \log(m_j + \eta_j)}{\delta_j + s_j} \right)^2$$

where,  $y_j$  is a “measurement value” (ie, data point);  $\Phi$  denotes all model random variables;  $\eta_j$  is the offset value, eta, for a particular “integrand” (prevalence, incidence, remission, excess mortality rate, with-condition mortality rate, cause-specific mortality rate, relative risk, or standardised mortality ratio), and  $a_j$  is the adjusted measurement for data point  $j$ , defined by:

$$a_j = e^{(-u_j - c_j)} y_j$$

where  $u_j$  is the total “area effect” (ie, the sum of the random effects at three levels of the cascade: super-region, region, and country) and  $c_j$  is the total covariate effect (ie, the mean combined fixed effects for sex, study-level, and country-level covariates), defined by:

$$c_j = \sum_{k=0}^{K[I(j)]-1} \beta_{I(j),k} \hat{X}_{k,j}$$

with standard deviation

$$s_j = \sum_{l=0}^{L[I(j)]-1} \zeta_{I(j),l} \hat{Z}_{k,j}$$

where  $k$  denotes the mean value of each data point in relation to a covariate (also called x-covariate);  $l(j)$  denotes a data point for a particular integrand,  $j$ ;  $\beta_{I(j),k}$  is the multiplier of the  $k^{\text{th}}$  x-covariate for the  $i^{\text{th}}$  integrand;  $\hat{X}_{k,j}$  is the covariate value corresponding to the data point  $j$  for covariate  $k$ ;  $l$  denotes the standard deviation of each data point in relation to a covariate (also called z-covariate);  $\zeta_{I(j),k}$  is the multiplier of the  $l^{\text{th}}$  z-covariate for the  $i^{\text{th}}$  integrand; and  $\delta_j$  is the standard deviation for adjusted measurement  $j$ , defined by:

$$\delta_j = \log[y_j + e^{(-u_j - c_j)} \eta_j + c_j] - \log[y_j + e^{(-u_j - c_j)} \eta_j]$$

Where  $m_j$  denotes the model for the  $j^{\text{th}}$  measurement, not counting effects or measurement noise and defined by:

$$m_j = \frac{1}{B(j) - A(j)} \int_{A(j)}^{B(j)} I_j(a) da$$

where  $A(j)$  is the lower bound of the age range for a data point;  $B(j)$  is the upper bound of the age range for a data point; and  $I(j)$  denotes the function of age corresponding to the integrand for data point  $j$ .

The source code for DisMod-MR 2.1 as well as the wrapper code are available at <http://ihmeuw.org/dismod-ode>.

### 3.2.4 Natural history models

For some causes where cause of death data may be systematically biased due to either misclassification or because the disease exists in focal communities without vital registration or verbal autopsy studies, we have developed natural history models. In natural history models incidence and case-fatality rates are modelled separately and then combined to produce estimates of cause-specific mortality.

### 3.2.5 Prevalence-based models

The modelling strategies for Alzheimer's and other dementias, Parkinson's disease, and atrial fibrillation and flutter are distinct from those used for other causes modelled as natural history models. These models use prevalence estimates and excess mortality rates (EMR) generated through DisMod-MR 2.1, rather than incidence and case-fatality rates.

### 3.2.6 Sub-cause proportion models

For certain sub-causes for which accurate diagnoses are known to be very difficult, we first modelled the parent cause in the GBD hierarchy with CODEm and then allocated deaths to specific causes using proportions of the parent cause for each age-sex-location-year for each sub-cause. For these causes, we identified no significant predictors in negative binomial regressions. This approach was taken because the available data on these specific causes may come from sources other than VR, such as end-stage renal disease registries, or come from too few places to model the death rates directly. Details for each cluster of causes analysed in this way are below.

### 3.3 Cause of death modeling descriptions

#### Tuberculosis

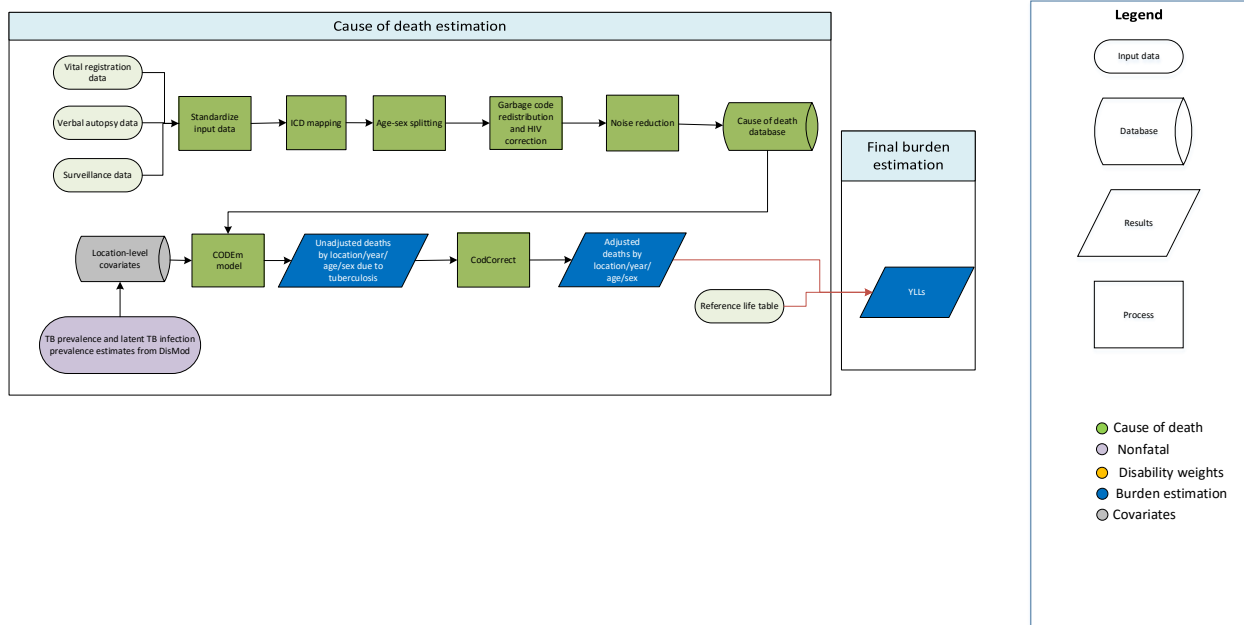

#### Input data

Input data for modeling tuberculosis mortality among HIV-negative individuals include vital registration, verbal autopsy, and surveillance data. Vital registration data were adjusted for garbage coding (including ill-defined codes, and the use of intermediate causes) following GBD algorithms and misclassified HIV deaths (i.e., HIV deaths being assigned to other underlying causes of death such as tuberculosis or diarrhea because of stigma or misdiagnosis). This correction was done based on examining changes in the age pattern of diseases over time.

Verbal autopsy data in countries with age-standardized HIV prevalence greater than 5% were removed because of a high probability of misclassification, as verbal autopsy studies have poor validity in distinguishing HIV deaths from HIV-TB deaths.

#### Modeling strategy

We changed the modeling strategy of tuberculosis in GBD2016 by first modeling prevalence of disease and prevalence of latent infection which were then used as covariates in the CODEm model. We dropped the health system access covariate and replaced it by the newly developed Healthcare Access and Quality Index covariate. We also added the adult underweight proportion covariate. Other location-level covariates included in the CODEm model were the same as in GBD 2015: alcohol (liters per capita), diabetes (fasting plasma glucose mmol/L), education (years per capita), lag-distributed income, indoor air pollution, outdoor air pollution, population density, smoking prevalence, sociodemographic status, and a summary exposure variable reflecting the average exposure to all of the risk factors.

# Multidrug-resistant tuberculosis, extensively drug-resistant tuberculosis, and drug-susceptible tuberculosis

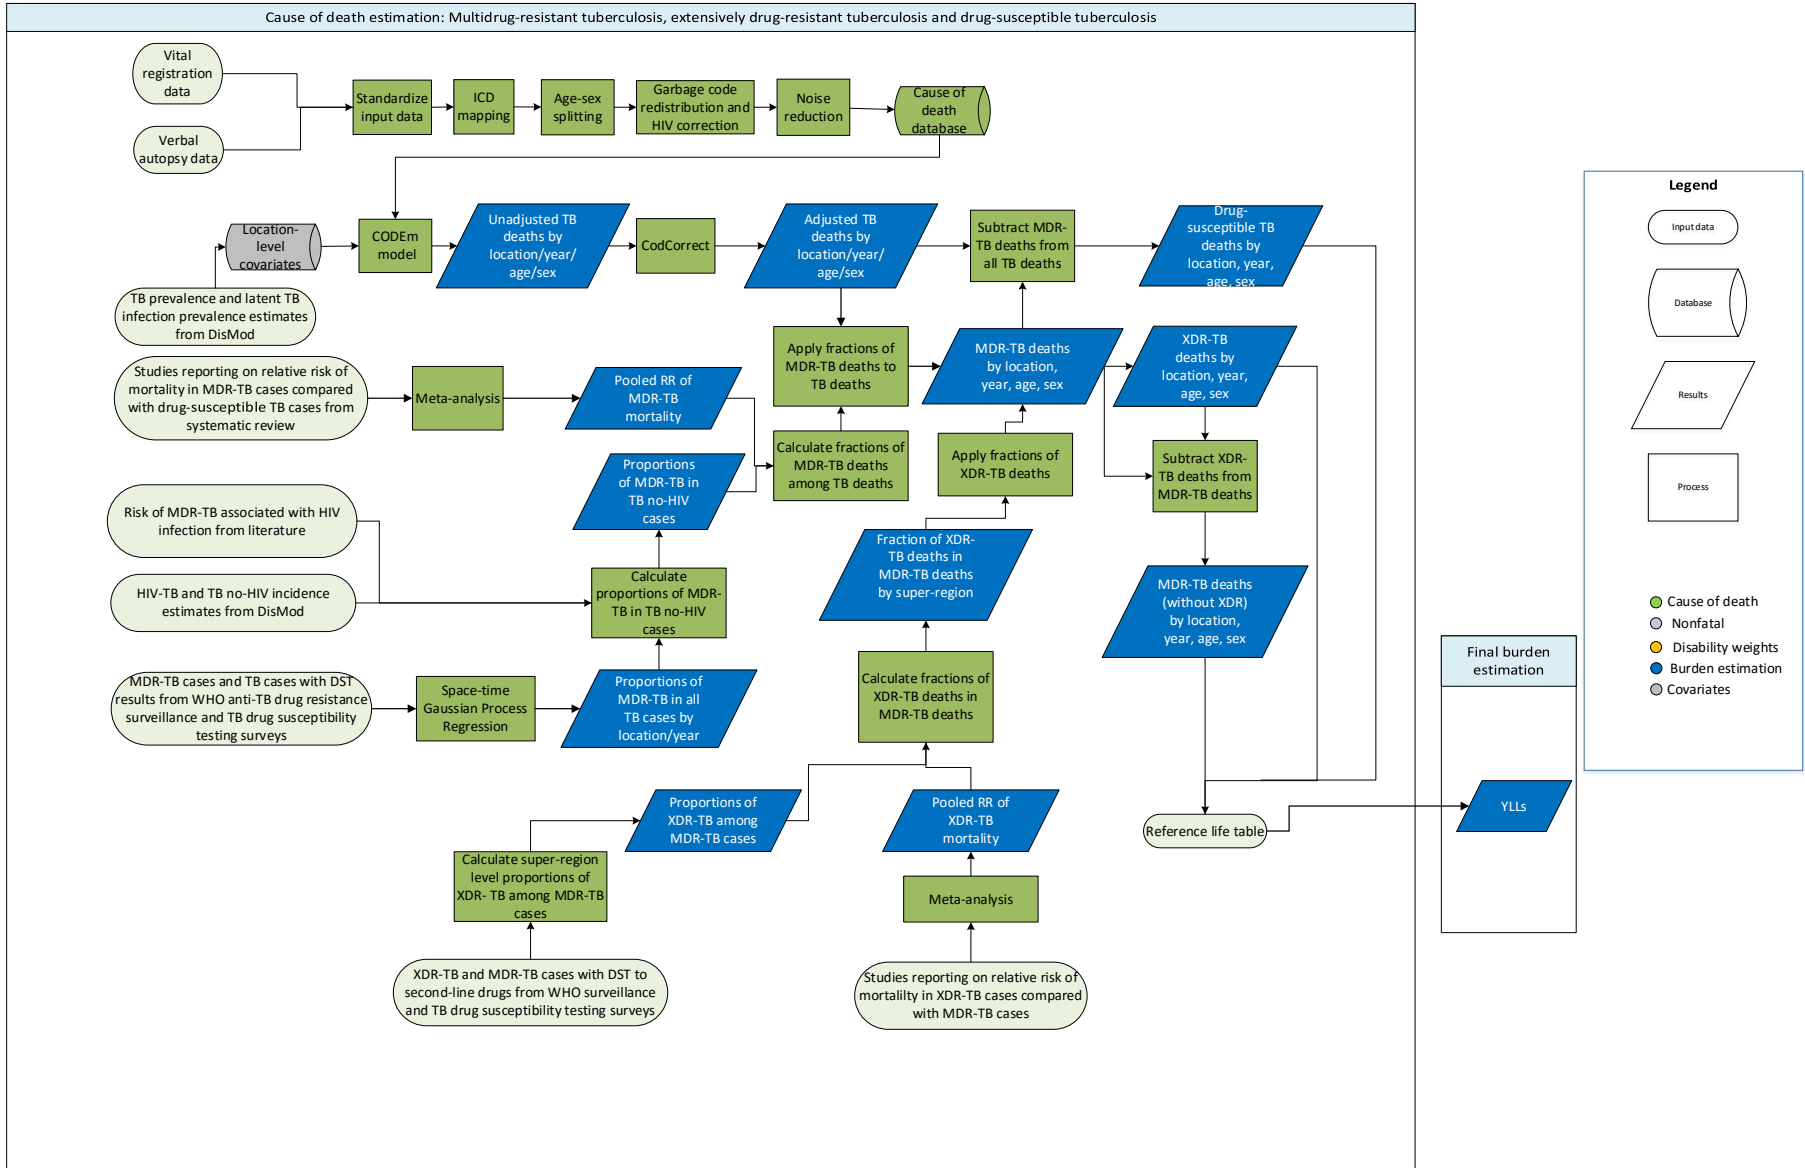



## Input data

Input data include: (i) the number of drug-resistant cases by type (multidrug-resistant tuberculosis [MDR-TB], extensively drug-resistant tuberculosis [XDR-TB], all TB cases with a drug sensitivity testing [DST] result for isoniazid and rifampicin, and MDR-TB cases with DST for second-line drugs) from routine surveillance and surveys reported to the World Health Organization, (ii) the relative risk of death in MDR-TB cases compared with non-MDR TB (drug-susceptible TB) cases, and , and the relative risk of death in XDR-TB cases compared with MDR-TB cases reported by studies identified through our systematic review, and (iii) the risk of multi-drug resistant tuberculosis associated with HIV infection from the literature.<sup>1</sup>

## Modelling strategy

We conducted a systematic review and meta-analysis of studies reporting the relative risk of death in MDR-TB cases compared with drug- susceptible TB cases. We also ran a spatiotemporal Gaussian process regression to predict the proportions of MDR-TB cases among all TB cases for all locations and years. The input data for this regression (i.e., proportions of MDR-TB cases among all TB cases) were based on the number of MDR-TB cases, and the number of TB cases with DST for isoniazid and rifampicin from routine surveillance and surveys reported to the World Health Organization. We then used the predicted proportions to MDR-TB cases among all TB cases, along with the HIV-TB and TB no-HIV incidence estimates (from our modeling of non-fatal TB), and the relative risk of MDR-TB associated with HIV infection from the literature<sup>1</sup> to compute the proportions of MDR-TB cases among HIV negative TB cases ( $P_{c,y,a,s}$ ) by location, year, age, and sex using the following formula:

$$P_{c,y,a,s} = \frac{MDR_{c,y,a,s}}{\left(1 + \left(rr \frac{HIVTB_{c,y,a,s}}{TBnoHIV_{c,y,a,s}}\right)\right) TBnoHIV_{c,y,a,s}}$$

where  $MDR_{c,y,a,s}$  is the number of all MDR-TB cases among HIV-positive and HIV-negative individuals,  $rr$  is the relative risk of MDR-TB associated with HIV infection,  $HIVTB_{c,y,a,s}$  is the number of HIV-TB incident cases by location, year, age, and sex, and  $TBnoHIV_{c,y,a,s}$  is the number of TB no-HIV incident cases by location, year, age, and sex.

We then computed the fraction of MDR-TB deaths among all HIV-negative TB deaths ( $D_{c,y,a,s}$ ) using the following formula:

$$D_{c,y,a,s} = \frac{P_{c,y,a,s}RR}{P_{c,y,a,s}RR + 1 - P_{c,y,a,s}}$$

where  $RR$  is the relative risk of death in MDR-TB cases compared with drug- susceptible TB cases. We then applied the predicted fractions of MDR-TB deaths among HIV-negative TB deaths to our CODEm TB death estimates to generate MDR-TB deaths by location, year, age, and sex. Next, we subtracted MDR-TB deaths from all TB deaths to generate drug- susceptible TB deaths by location, year, age, and sex.

To separate out XDR-TB from MDR-TB, we aggregated the XDR-TB cases and MDR-TB cases (with DST for second-line drugs) up to the super-region level and calculated the super-region level proportions of XDR-TB among MDR-TB cases. Next, we computed the superregion-year-specific fractions of XDR-TB deaths among all MDR-TB deaths ( $D_{XDRsr,y}$ ) using the following formula:

$$D_{XDRsr,y} = \frac{P_{XDRsr,y} RR_{XDR}}{P_{XDRsr,y} RR_{XDR} + 1 - P_{XDRsr,y}}$$

where  $RR_{XDR}$  is the pooled relative risk of mortality in XDR-TB cases compared with MDR-TB cases. These fractions were then applied to MDR-TB deaths in corresponding countries within the super-regions to produce XDR-TB deaths by location, year, age, and sex. We linearly extrapolated XDR-TB mortality rates back assuming the mortality rates were zero in 1992, one year before 1993 when XDR-TB was first recorded in USA surveillance data.<sup>2</sup> Finally, we subtracted XDR-TB deaths from MDR-TB deaths to generate MDR-TB (without extensive drug resistance) deaths by location, year, age, and sex.

## Reference

1. Mesfin YM, Hailemariam D, Biadgign S, Kibret KT. Association between HIV/AIDS and multi-drug resistance tuberculosis: a systematic review and meta-analysis. *PLoS One*. 2014;9(1):e82235.
2. Centers for Disease Control and Prevention (CDC). Extensively Drug-Resistant Tuberculosis --- United States, 1993—2006. *MMWR*. 2007; 56(11);250-253

# HIV/AIDS

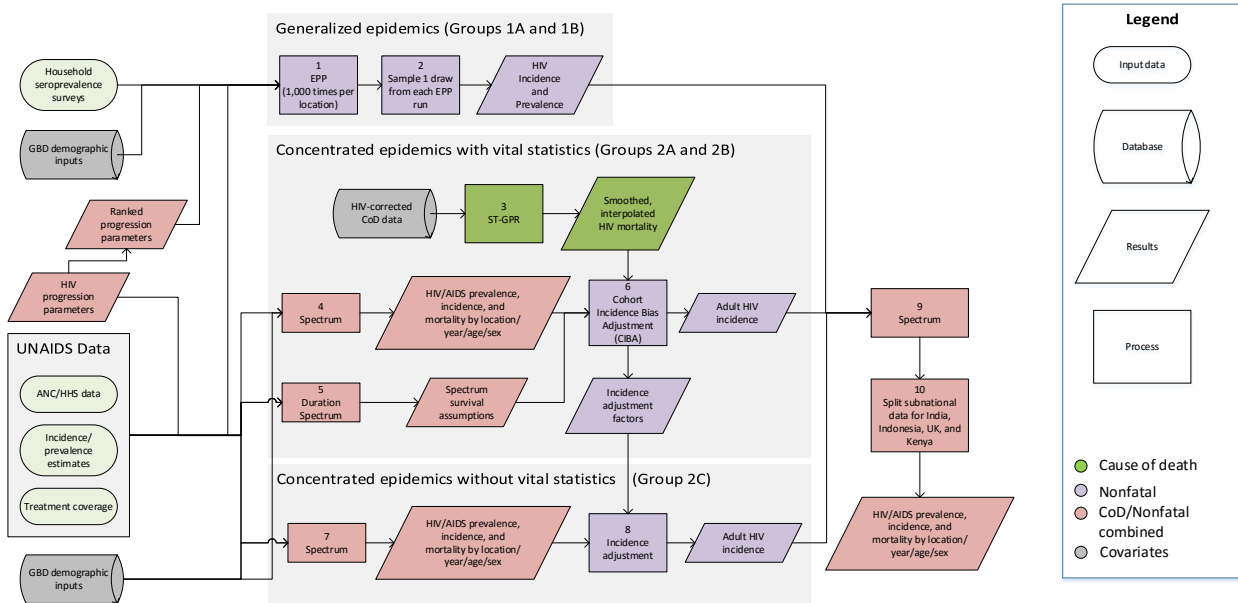

## Input data

### Household seroprevalence surveys

Geographically representative HIV seroprevalence survey results were used as inputs to the model for countries with generalized HIV epidemics where available.

### GBD demographic inputs

Location-specific population, fertility, and HIV-free survival rates from GBD 2016 and migration data from UNAIDS were used as inputs in modeling all locations.

### UNAIDS data

Antenatal care, incidence, prevalence, and treatment coverage data from UNAIDS were used in modeling for all locations.

### On-ART literature data

Data were identified by using search terms “HIV,” “mortality,” and “antiretroviral therapy” in PubMed searches across the literature. To be included, studies must include only HIV-positive people who receive antiretroviral therapy (ART) but who were ART-naïve prior to the study. In addition, studies must report either a duration-specific mortality proportion or a hazard ratio across age or sex, and must not include children.

For duration-specific survival data, studies must report uncertainty on mortality estimates or provide stratum-specific sample sizes and must include duration-specific data to allow for calculation of 0-6, 7-12, or 13-24 month conditional mortality. In addition, studies must either report separate mortality and loss-to-follow-up (LTFU) curves, be corrected for LTFU using vital registration data, or be conducted in a

high-income setting. Finally, studies must report the percent of participants who are male, the median age of participants, and either data with specific data on the number of CD4 T lymphocytes (CD4 counts) or the median CD4 count used for the data.

Hazard ratio data for ages or sexes can only be used if the hazard ratios are controlled for other variables of interest (age, sex, and CD4 category).

#### Changes for GBD 2016

In GBD 2013, we identified 102 papers for extraction. For GBD 2015, we included 13 additional studies informing the duration-specific mortality estimation process and 26 studies informing the age and sex hazard ratio estimation process (some studies were used and counted in both). We also added one study to our LTFU analysis. For GBD 2016, we included 12 additional studies informing the duration-specific mortality estimation process and 11 studies informing the age and sex hazard ratio estimation process (some studies were used and counted in both).

#### Off-ART literature data

In GBD 2013, to characterize uncertainty in the progression and death rates, we systematically reviewed the literature on mortality without ART. We searched terms related to pre-ART or ART-naive survival since seroconversion.<sup>1</sup> After screening, we identified 13 cohort studies that included the cohorts used by UNAIDS from which we extracted survival at each one-year point after infection. Screening for additional, recently published studies in GBD 2015 and GBD 2016 identified no new cohort studies for inclusion in this analysis.

#### Burden estimation

The files compiled by UNAIDS for their HIV/AIDS estimation process were our main source of data for producing estimates of HIV burden. These files are typically country-specific and contain both demographic data (population, fertility, migration, and HIV-free survival rates) and HIV-specific information. In all cases except migration, we substituted in our own, internally consistent demographic estimates. The HIV-specific information includes what is needed to run both the Spectrum and Estimation and Projection Package (EPP) models. Spectrum requires data on AIDS mortality among people living with HIV with and without ART, CD4 progression among people living with HIV not on ART, ART coverage among adults and children, coverage of breastfeeding among women living with HIV, prevention of mother-to-child transmission coverage, and CD4 thresholds for treatment eligibility. EPP uses many of the same assumptions as Spectrum but fits a simpler model to HIV prevalence data from surveillance sites and large household surveys. We extracted all of these data from UNAIDS' proprietary formats.

For GBD 2016, we received national level files for 81 countries and subnational level files for 6 countries. For many of the missing countries, we had UNAIDS files from the previous estimation process, which we used again. After combining, we were left with a set of 42 countries for which we had never received a UNAIDS file, many of them countries with small populations and/or lower HIV prevalence. In those places, we generated regional averages of all needed inputs. This enabled us to run Spectrum for every GBD location.

In several cases, we have modified the structure or data in the UNAIDS files. In South Africa, which has been estimated at the province level since GBD 2015, we split the national-level UNAIDS file into nine provincial datasets. We used GBD 2016 demographic inputs for the provinces. These provinces are

already fit as separate subpopulations in EPP, so we extracted the prevalence data for the individual provinces and assumed national rates for all other Spectrum inputs. In some locations that are estimated only at the national level in GBD 2016, we received subnational files from UNAIDS. In these cases, we split GBD 2016 demographic input data using the subnational relative relationships found in the UNAIDS files. Additionally, we identified that the ratio of fertility in HIV-positive women to HIV-negative women was negative in Indonesia. We used linear extrapolation to replace this value.

We used all available sources of vital registration and sample registration data from the GBD Causes of Death database after garbage code redistribution and HIV/AIDS mis-coding correction, except in Group 1A countries as described below.<sup>2,3</sup> There are two different cause of death data sources for HIV/AIDS in China: the Disease Surveillance Point (DSP) system and the Notifiable Infectious Disease Reporting (NIDR) system. Both systems are administered by the Chinese Center for Disease Control and Prevention, but the reported number of deaths due to HIV is significantly lower in DSP. Therefore, we have used the provincial-level ratio of deaths due to HIV/AIDS from NIDR to those from DSP, choosing the larger ratio between years 2013 and 2014, and scaled the reported deaths in the DSP system, which is in turn used in the Space-Time Gaussian Process Regression (ST-GPR) process.

#### Modeling strategy

In GBD 2016, our general modeling strategy for estimating HIV incidence, prevalence, and mortality is very similar to the strategy used in GBD 2015. We continue to use the Spectrum program rewritten in Python for GBD 2013 to facilitate faster and more flexible execution necessary for our more intensive computational needs. We made several changes to Spectrum's assumptions comparing to the Spectrum software used by UNAIDS. We also again ran EPP using an open-source computer program in R written by Jeffrey Eaton.<sup>4</sup> We ran EPP for all Group 1 countries in order to produce incidence and prevalence estimates that were consistent with the demographic and epidemiological assumptions used in GBD 2016.

#### On-ART

First, we corrected reported probabilities of death for loss to follow-up using an update of the approach developed by Verguet and colleagues.<sup>5</sup> Verguet and colleagues used tracing and follow-up studies to empirically estimate the relationship between death in LTFU and the rate of LTFU.

To create estimates of age-specific hazard ratios, we synthesized hazard ratio data in five broad age groups: 15-25, 25-35, 35-45, 45-55, 55-100, and modeled the data using DisMod-MR 2.0.

To create estimates of sex-specific hazard ratios, we use the *metan* function in Stata to create estimates of relative risks separately by region, using female age groups as the reference group.

The age and sex hazard ratios were applied to the study level mortality rates, accounting for the distribution of ages and sexes in the mortality data. We then subtracted HIV-free mortality from the model life table process to calculate study level age-sex HIV-specific mortality.

We used DisMod-MR 2.0 to synthesize the age-sex split study level data into estimates of conditional probability of death over initial CD4 count.<sup>1</sup> We modeled the data separately by duration, age, and sex and added a fixed effect on whether the study was conducted prior to 2002. We estimated all three regions together using a fixed effect for each region.

## Changes for GBD 2016

In GBD 2016, we chose to age-sex split the data at the study level so that we could consider study-specific age-sex distributions, whereas previous GBD iterations relied upon region-specific distributions. We also subtracted study-specific HIV-free mortality rather than region-specific HIV-free mortality. Another change was a switch to estimating all regions together with fixed effects for each region. This allowed us to impart a CD4 trend in sub-Saharan Africa and other developing country estimates that led to more realistic estimates in the high CD4 categories where little data was available from those regions.

Another methods change for GBD 2016 was the distribution of ART coverage by age, sex, and CD4 count. We used two AIDS Indicator Surveys (Kenya 2012 and Uganda 2011) to predict the age-sex-CD4 distribution of ART coverage and applied those distributions to the input counts of people receiving ART in Spectrum. This shifted the coverage distribution to groups with higher CD4 counts, as was seen in the data.

## Off-ART

Following UNAIDS assumptions, no-ART mortality is modeled as shown in the figure below.<sup>1</sup>

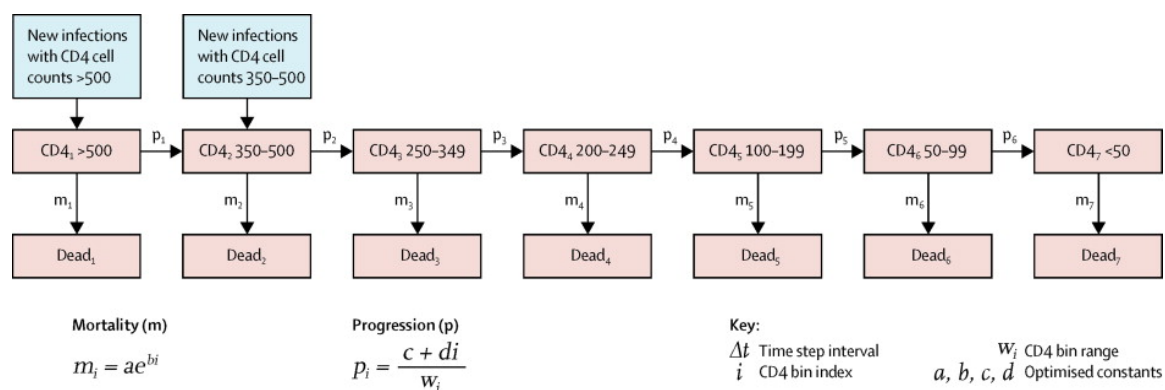

The death and progression rates between CD4 categories vary by age according to four age-groups, 15–24 years, 25–34 years, 35–44 years, and 45 years or older. We modeled the logit of the conditional probability of death between years in these studies using the following formula:

$$\text{logit}(m_{ijt}) = \beta_0 + \sum_{i=1}^4 \beta_{1i} a_i + \sum_{j=1}^{12} \beta_{2j} t_j + u_k + \varepsilon_{ijt}$$

In the formula,  $m$  is conditional probability of death from year  $t_j$  to  $t_{j+1}$ ,  $a_i$  is an indicator variable for age group at seroconversion (15–24 years, 25–34 years, 35–44 years, and 45 years or older),  $t_j$  is an indicator variable of year since seroconversion, and  $u_k$  is a study-level random effect.

By sampling the variance-covariance matrix of the regression coefficients and the study-level random effect, we generated 1,000 survival curves for each age group that capture the systematic variation in survival across the available studies. For each of the 1,000 survival curves, we use a framework modeled after the UNAIDS optimization framework in which we find a set of progression and death rates that minimizes the sum of the squared errors for the fit to the survival curve.<sup>6,7</sup>

## Burden estimation overview

UNAIDS uses two key analytical components in their epidemiological estimation. EPP is used to estimate incidence trajectories that are consistent with prevalence surveys and other prevalence measurements such as antenatal clinic serosurveillance. Spectrum is a compartmental HIV progression model used to

generate age-specific incidence, prevalence, and death rates from the EPP incidence curves and assumptions about intervention scale-up and local variation in epidemiology.

For GBD 2013, we created a replica of Spectrum in Python. This enabled us to run thousands of iterations of the model at once on our computing cluster and allowed for more flexible input data structures. Additionally, in order to generate estimates with more realistic ranges of uncertainty than those in UNAIDS 2012, we adjusted all input data by uniformly sampled factors between 0.9 and 1.1. These changes, along with our new estimation of on- and off-ART mortality and CD4 progression parameters, persist into GBD 2016.

Due to the substantial differences in the quality and types of data available across different countries, we used three different methodologies to produce year-, age-, and sex-specific estimates of HIV incidence, prevalence, and mortality.

Countries with high HIV prevalence and available seroprevalence surveys or antenatal clinic data (Groups 1A and 1B)

We identified 50 countries – as well as subnational locations in India, Kenya, and South Africa – with at least 0.5% adult HIV prevalence and at least one geographically representative HIV seroprevalence survey or available antenatal care clinic (ANC) data. In order to ensure that our estimates of incidence and prevalence in these places were consistent with our estimates of HIV progression, we used a version of EPP written in R and C++ by Jeffrey Eaton to create new fits to the available prevalence data. The version of EPP used in GBD 2016 was an updated release from Jeffrey Eaton since completion of GBD 2015. In this new version, an ANC prevalence adjustment was included and incorporated with the 2016 lookup database and an additional parameter to estimate ANC variance inflation was included as well. In the ANC bias adjustment, instead of using the default universal assumption of the prior mean and standard deviation (SD) of the distribution that the adjustment follows, we selected the parameters based on each sub-population (general population and high risk population) in each location. For sub-populations with prevalence survey data, we used the default assumption with mean=0.15 and SD=1. For subpopulations without prevalence survey data, we chose the region/epidemic specific mean and SD based on the median probit difference and probit difference SD in Table 1 of Marsh et al.<sup>8</sup>

India's HIV epidemic is classified as concentrated in specific subpopulations rather than generalized to the full population, and only one prevalence survey, the 2005-2006 National Family Health Survey (NFHS-3), was available, so we used modified parameters for Indian states in EPP. We first calculated the mean of the median probit difference between men and women for "Countries with concentrated epidemics" in Table 1 of March et al as mentioned above, which was 0.245. Then we derived empirical parameters based on the difference between the ANC data and the NFHS-3 survey data in probit space to use for the general population. Specifically, we calculated the probit difference by taking the median of all raw ANC prevalence in years 2004 through 2006 and comparing to the 2005 prevalence survey data in probit space for three states with large HIV epidemics: Andhra Pradesh, Karnataka, and Maharashtra. From this empirical parameter derivation, we got the mean and SD value based on the three states as 0.124 and 0.051, respectively. We then used linear interpolation between the prevalence with a prior of 0.245 and the new prior of 0.124 to recalculate the mean and keep the SD the same as the empirical estimates. The final assumption of the prior mean and SD were 0.182 and 0.051, respectively. We did not make any adjustments for high risk populations.

In the new version of EPP, in addition to the equilibrium prior assumption of the force of infection in projection, a random walk approach is available as an alternative method. For locations with two or more prevalence surveys and a declining trend between the mean of the most recent two surveys, the random walk approach was chosen to project the force of infection. We assumed the change of the log scaled force of infection was following a normal distribution with mean equal to the median of the change of the modeled force of infection among the years having ART implemented or prevalence data, and the SD was equal to the default setting as the mean SD of the change of the modeled force of infections among the years having prevalence data. The projection year was chosen from the most recent year between the year with the lowest model force of infection and the year of the second latest survey data.

For Indian states, we used the equally weighted draw-level estimates of the equilibrium prior and random walk assumptions since we had no further information to support either assumption for each state. Here, the projection year of the random walk was the year with the lowest modeled force of infection because no locations had more than one prevalence survey, and the assumption of increasing ART coverage was supported by the data available to us.

In the new EPP code, an optimization step was added into IMIS function to speed up the parameter sampling step based on Raftery and Bao<sup>9</sup>. Two optimization methods have been introduced. The main algorithm is Broyden–Fletcher–Goldfarb–Shanno (BFGS) optimization. If BFGS fails, Nelder-Mead optimum is used instead. In our 2016 EPP model, by substituting in our own assumptions about HIV progression rates and on/off ART mortality, we were able to ensure that the implied relationship between incidence and mortality/prevalence in EPP is similar to that in Spectrum.

In Group 1 locations, we expect estimates of HIV burden to exhibit substantial uncertainty. To reflect this, we induced a perfect correlation between the previously independent draws of HIV mortality with and without ART and CD4 progression. We paired the draws of the three parameter sets internally and with each other in the following way: we sorted without-ART mortality and CD4 progression internally by age (not CD4), meaning the highest draw of HIV mortality without ART for age  $a_i$  and CD4 category  $c_i$  will be paired with the highest draw of HIV mortality without ART for age  $a_k$  and CD4 category  $c_i$ . In the same way, we sorted with-ART mortality internally by age, sex, CD4 count at treatment initiation, and duration on treatment. After this sorting process, the lowest indexed draw of each parameter has the highest values and vice versa. This means that we will use the most extreme possible parameter sets in EPP and Spectrum and should see a commensurate expansion in the range of the uncertainty.

To ensure that this expanded uncertainty is replicated in EPP, we fit the model once for every set of paired draws of the progression parameters for every location. This means that the first iteration of EPP for Uganda sees the highest draws of all three sets of progression parameters. Such a procedure is necessary because EPP currently has no mechanism for incorporating uncertainty in any inputs except prevalence data. This process (Process 1 in the HIV/AIDS Estimation Flowchart), produced 1,000 sets of EPP output for each of the locations that make up the 48 countries in the group. Every set of EPP outputs contains 500 consistent draws of HIV incidence and prevalence in adults aged 15-49. In many cases, the algorithm used to fit EPP, incremental mixture importance sampling, failed, resulting in fewer than 1,000 sets of EPP results.

For every location in the group, we sampled one of the 500 incidence/prevalence draws from each of the sets of EPP results (Process 2 in the HIV/AIDS Estimation Flowchart). By sampling one draw from



each set, we ensured that the distribution of progression parameters dictating the relationship between incidence and prevalence was exactly the same as the distribution of the sorted parameters generated in the previous step. In locations where not all 1,000 iterations of EPP fit successfully, we sampled one draw from every iteration that did succeed and then resampled with replacement from that set of draws. To maintain the link between the input progression draws and the resulting incidence and prevalence draws from EPP, we replaced any parameter draw associated with a failed run of EPP with the parameter draw that that failed draw was replaced with. At the end of this process, for every location in the set of 48 countries, we were left with 1,000 linked draws of adult incidence and prevalence and the exact progression parameters that generated those draws.

We then ran these results, along with the previously described demographic and HIV-specific inputs, through Spectrum to produce location-, year-, age-, and sex-specific estimates of HIV incidence, prevalence, and mortality (Process 9 in the HIV/AIDS Estimation Flowchart).

Countries with vital registration data (Group 2A and 2B)

Vital registration is one of the highest-quality sources of data on HIV burden in many countries, so generating estimates that are consistent with these data, with necessary adjustment to account for any potential underreporting, is critical. We identified 114 countries – as well as 440 subnational locations from Brazil, China, Japan, Indonesia, Mexico, Sweden, the United Kingdom, and the United States – with at least two usable points of vital registration data, verbal autopsy data, or sample registration system data such as DSP in China.

We imputed missing years of data to generate a complete time series for HIV from the estimated start year of the epidemic using ST-GPR. We analyzed mortality trends using ST-GPR starting in 1981, the year that HIV was first identified in the United States.<sup>10</sup> For ST-GPR, we adjusted the lambda (time weight) and GPR scale according to the completeness of vital registration data, with 4- and 5-star quality VR using parameters designed to follow the data more closely. We produced separate splines by country/age group, up to the peak year of death rate. We then ran a linear regression with random effects on region, age, and sex. Following this, we ran space-time residual smoothing, in which time, age, and space weights are used to inform smoothing of the residuals between data points and the linear regression estimate. From this process, we generated space-time estimates with the applied weights, along with the median absolute deviation (MAD) of the space-time estimates from the data. The MAD was calculated at various levels of the geographic hierarchy (e.g., subnational and national), and was added into the data variance term. The data variance and space-time estimates were then analyzed using Gaussian Process Regression to return a final estimate of mortality along with uncertainty.

Although Spectrum produces HIV mortality estimates that are within the realm of possibility in most countries using the incidence curves provided in the UNAIDS 2012/2015 country files, it is a deterministic model that has not yet been integrated into an optimizable framework. Therefore, in order to “fit” it to vital registration data, we need to adjust input incidence.

To improve the fit of this process, in GBD 2015, we restructured Spectrum to add compartments that identify groups of people living with HIV by year of infection (Process 5 in the HIV/AIDS Estimation Flowchart). With this version of Spectrum we can output, among many other metrics, HIV deaths by year, age, sex, and infection cohort. This enables us to adjust incidence to fit to death much more precisely and without making any rigid assumptions about the time from HIV infection to HIV death.

We incorporated these improvements into a cohort incidence bias adjustment (CIBA) process. First, we ran Spectrum normally to produce 1,000 draws of incidence, prevalence and mortality (Process 4 in the HIV/AIDS Estimation Flowchart). Then, by year, age, and sex, we took the ratio of VR deaths to Spectrum deaths to quantify the amount of bias in Spectrum. Using the mean duration data from the new version of Spectrum, for every year-, age-, and sex-specific infection cohort, we calculated the share of all HIV deaths observed over the course of the projection period in that cohort that would occur in each year after the year of infection. For example, projecting from 1970 through 2015, we identified the cohort of men infected in 1992 at the age of 16, calculated the total number of HIV deaths in that cohort in all subsequent years through the end of 2015, and divided the annual number of deaths by that total. This showed us the distribution of deaths among that cohort over the projection period. In the most extreme case (infections in 2014), we could only produce one point of that distribution (2015), so that single value is exactly 1.0; 100% of the deaths observed in that cohort occurred in 2015.

We then used these distributions of death to weigh the ratio of VR deaths to Spectrum deaths, meaning that ratios in the years where we expect the largest share of deaths were weighed most heavily. We then multiplied the initial size of that cohort from the normal run of Spectrum by the sum of the combined ratios to get a new estimate of new cases in that year/age/sex combination.

We can write this method mathematically in the following way:

$$r_t = \frac{VR_t}{D_t}$$

$$\rho_t^{t-i} = \frac{d_t^{t-i}}{\sum_{k=t-i+1}^n d_k^{t-i}}$$

$$\alpha^{t-i} = \sum_{k=t-i+1}^n r_k * \rho_k^{t-i}$$

$$n_{\text{adjusted}}^{t-i} = \alpha^{t-i} * n^{t-i}$$

$VR_t$  is the number of HIV/AIDS deaths in year  $t$  from ST-GPR, and  $D_t$  is the number of HIV/AIDS deaths from the first run of Spectrum. In the second equation,  $d_t^{t-i}$  is the number of HIV/AIDS deaths among members of infection cohort  $t - i$  in year  $t$ , with  $i \geq 1$ , from the new, duration-tracking version of Spectrum, and  $n$  is final year of the projection. Therefore,  $\rho_t^{t-i}$  is the share of observed deaths in cohort  $t - i$  that we expect to occur in year  $t$ . It follows, that  $\alpha^{t-i}$  is the weighted adjustment ratio described above, which we multiply by the estimated initial size of infection cohort  $t - i$  as calculated in the first stage Spectrum run to get the adjusted number of new cases,  $n_{\text{adjusted}}^{t-i}$ . This process is run separately for every sex and single-age pair.

CIBA (Process 6 in the HIV/AIDS Estimation Flowchart) allows ratios in each year after a given infection year to influence the final adjustment to incidence. The size of that influence is determined by the relative importance of that year in the cohort-year's distribution of deaths over time. The result is a new set of 1,000 draws of incidence and a set of 1,000 ratios of post-adjustment incidence to pre-adjustment incidence. We perform this adjustment using mean durations from the new version of Spectrum in order to try to shift the mean of the regular distribution of deaths.

Finally, to produce location-, year-, age-, and sex-specific estimates of HIV incidence, prevalence and mortality, we ran the new estimates of incidence and all previously input data through Spectrum (Process 9 in the HIV/AIDS Estimation Flowchart).

Countries without survey data and vital registration data (Group 2C)

The remaining 31 countries – as well as 14 subnational locations from China and Saudi Arabia – had neither geographically representative seroprevalence surveys nor reliable vital registration systems. To produce estimates of HIV burden in these countries, we assumed that Spectrum is similarly biased as in other Group 2 countries. This involved running Spectrum (Process 7 in the HIV/AIDS Estimation Flowchart), adjusting incidence using 1,000 adjustment ratios randomly sampled from the entire set of CIBA results (Process 8), and rerunning Spectrum using the new draws of adjusted incidence (Process 9). As above, the estimates of incidence, prevalence, and mortality were incorporated into the rest of the machinery via the reckoning process.

Subnational splitting and aggregation

Spectrum results for India, Kenya, Indonesia, and UK subnational locations are modeled at higher levels of geography than our GBD locations. Spectrum results for India are produced at the state level, while GBD 2016 estimates were produced at the state urban-rural level; Spectrum models Kenya provinces, while we compute Kenyan estimates for 47 counties. Indonesia and the United Kingdom have Spectrum results at the national level, while GBD 2016 estimates Indonesian provinces and Upper Tier Local Authorities in the UK. To split the Spectrum results into more granular results for processing, we assign each GBD subnational unit to a Spectrum modeling unit. From this, we generate age/sex/year-specific proportions for population, HIV-specific death, and HIV-free mortality.

In Cote d'Ivoire, Haiti, Moldova, Mozambique, and Zimbabwe, the country files that we received from UNAIDS contained only subnational data without national-level aggregates. In these locations, we generated GBD 2016 demographic inputs for the provided subnational units using the proportions present in the UNAIDS files and ran the locations through EPP and Spectrum at the subnational level before aggregating to generate final national level GBD 2016 estimates.

Limitations

We have not incorporated sex-specific allocation of ART in children under-5 for this round, though we did use sex-specific coverage for adults. The age- and sex-specific distributions of ART coverage we used were generated from two AIDS Indicator Surveys and can be expanded upon in future iterations of the GBD study.

HIV/AIDS resulting in other diseases

There are two Level 4 causes under the HIV/AIDS Level 3 cause in the GBD 2015 cause hierarchy. The modeling process for HIV/AIDS-tuberculosis is detailed in a separate part of this appendix. We computed deaths for HIV resulting in other diseases by subtracting HIV/AIDS-tuberculosis deaths from all HIV deaths at the 1,000 draw level.

## References

- 1 Murray CJL, Ortblad KF, Guinovart C, *et al.* Global, regional, and national incidence and mortality for HIV, tuberculosis, and malaria during 1990–2013: a systematic analysis for the Global Burden of Disease Study 2013. *The Lancet* 2014; **384**: 1005–70.
- 2 Global, regional, and national age–sex specific all-cause and cause-specific mortality for 240 causes of death, 1990–2013: a systematic analysis for the Global Burden of Disease Study 2013. *The Lancet* 2015; **385**: 117–71.
- 3 Birnbaum JK, Murray CJ, Lozano R. Exposing misclassified HIV/AIDS deaths in South Africa. *Bull World Health Organ* 2011; **89**: 278–85.
- 4 jeffeaton/epp. GitHub. <https://github.com/jeffeaton/epp> (accessed April 21, 2016).
- 5 Verguet S, Lim SS, Murray CJL, Gakidou E, Salomon JA. Incorporating Loss to Follow-up in Estimates of Survival Among HIV-Infected Individuals in Sub-Saharan Africa Enrolled in Antiretroviral Therapy Programs. *J Infect Dis* 2013; **207**: 72–9.
- 6 Ghyis PD, Zaba B, Prins M. Survival and mortality of people infected with HIV in low and middle income countries: results from the extended ALPHA network. *AIDS* 2007; **21 Suppl 6**: S1–4.
- 7 Hallett TB, Zaba B, Todd J, *et al.*, ALPHA Network. Estimating incidence from prevalence in generalised HIV epidemics: methods and validation. *PLoS Med* 2008; **5**: e80.
- 8 Marsh K, Mahy M, Salomon JA, Hogan DR. Assessing and adjusting for differences between HIV prevalence estimates derived from national population-based surveys and antenatal care surveillance, with applications for Spectrum 2013. *AIDS* 2014; **28 Suppl 4**: S497–505.
- 9 Raftery AE, Bao L. Estimating and Projecting Trends in HIV/AIDS Generalized Epidemics Using Incremental Mixture Importance Sampling. *Biometrics* 2010; **66**: 1162–73.
- 10 CDC. Pneumocystis Pneumonia --- Los Angeles. MMWR Weekly. 1981; published online June 5. [http://www.cdc.gov/mmwr/preview/mmwrhtml/june\\_5.htm](http://www.cdc.gov/mmwr/preview/mmwrhtml/june_5.htm) (accessed April 21, 2016).
- 11 Brown T, Peerapatanapokin W. The Asian Epidemic Model: a process model for exploring HIV policy and programme alternatives in Asia. *Sex Transm Infect* 2004; **80 Suppl 1**: i19–24.

# Multidrug-resistant HIV/AIDS-tuberculosis, extensively drug-resistant HIV/AIDS-tuberculosis and drug-susceptible HIV/AIDS-tuberculosis

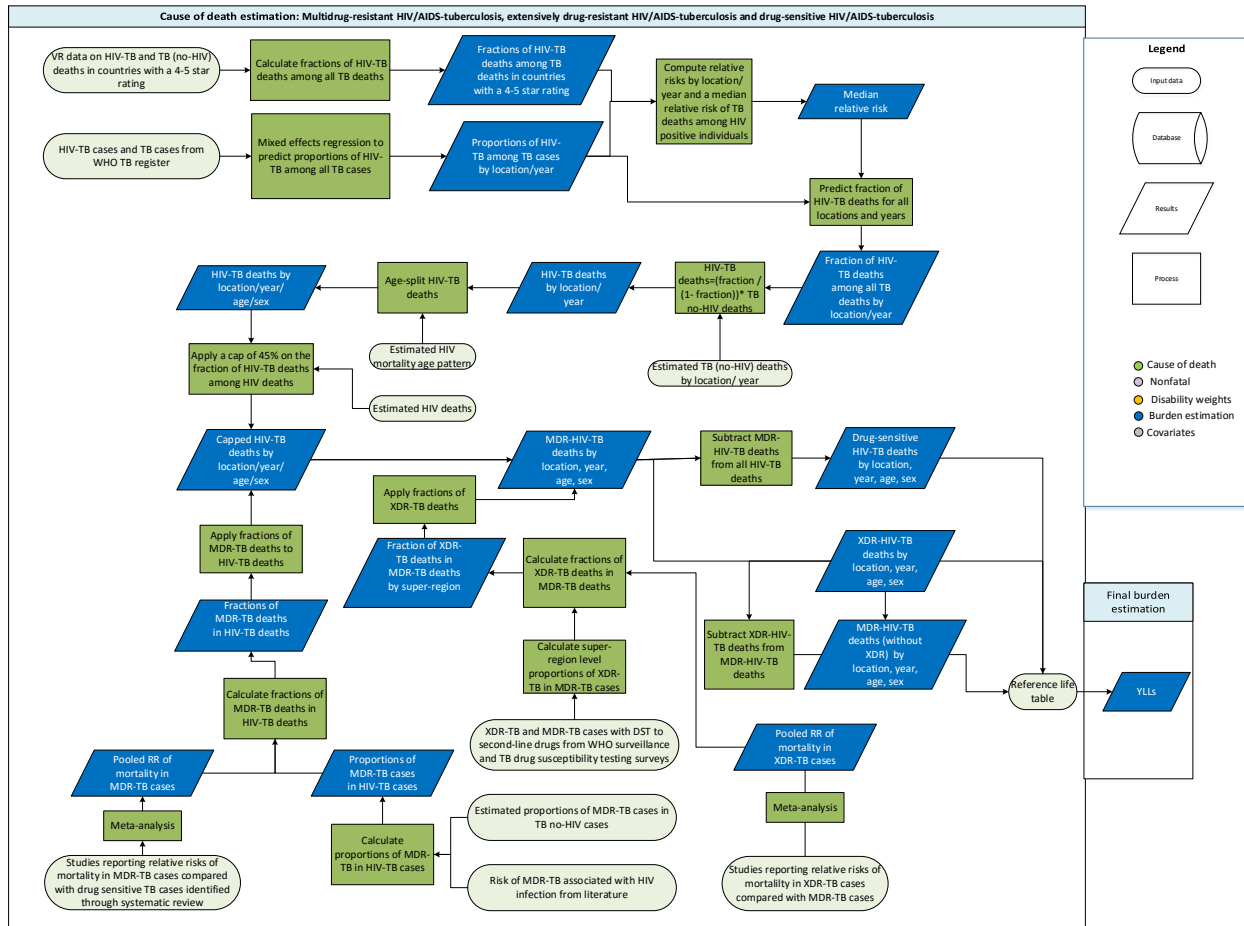

## Input data

Input data for HIV/AIDS-tuberculosis (HIV-TB) mortality estimation include (i) 382 site-years of vital registration data from countries with a four or five-star rating where cause of death data for directly coded HIV-TB and tuberculosis (TB) were available, and (ii) the number of TB cases (new and re-treatment) recorded as HIV-positive and the number of TB cases (new and re-treatment) with an HIV test result recorded in the TB register from the World Health Organization (WHO). We excluded data from countries with ten HIV-TB deaths or less. We also excluded data that were largely conflicting with the majority of data for other years from the same country.

Input data for estimation of multidrug-resistant and extensively drug-resistant HIV-TB include: (i) the number of drug-resistant cases by type (multidrug-resistant tuberculosis [MDR-TB], extensively drug-resistant tuberculosis [XDR-TB], all TB cases with a drug sensitivity testing [DST] result for isoniazid and rifampicin, and MDR-TB cases with DST for second-line drugs) from routine surveillance and surveys reported to the World Health Organization. Additional input data include relative risks of mortality in MDR-TB cases compared with drug-susceptible TB cases, and relative risks of mortality in XDR-TB cases compared with MDR-TB cases reported by studies identified through our systematic review, and the risk of MDR-TB associated with HIV infection from the literature.<sup>1</sup>

## Modelling strategy

To determine TB deaths in HIV-positive individuals, we first computed the fraction of HIV-TB deaths among all TB deaths using vital registration data from countries with a four or five-star rating. We also calculated the proportion of TB cases that are HIV-positive (ie, number of TB cases recorded as HIV-positive/number of TB cases with an HIV test result recorded in the WHO TB register). We used these proportions as input data for a mixed effects regression to predict the proportions of HIV-TB cases among all TB cases for all locations and years using an adult HIV death rate covariate. We estimated the fraction of HIV-TB deaths among all TB deaths in each location and year ( $D_{c,y}$ ), defined by

$$D_{c,y} = \frac{P_{c,y}RR}{P_{c,y}RR + 1 - P_{c,y}}$$

where  $P_{c,y}$  is the proportion of HIV-TB cases among all TB cases and  $RR$  is the relative risk of TB deaths in HIV positive individuals, defined by:

$$RR = \frac{D_{c,y}P_{c,y} - D_{c,y}}{D_{c,y}P_{c,y} - P_{c,y}}$$

We took the median relative risk ( $RR$ ) from each calculation. We then applied the median  $RR$  and the predicted proportions of HIV-TB cases among all TB cases to get the fractions of HIV-TB deaths among all TB deaths for all locations and years. Location-year-specific HIV-TB deaths were then calculated using the following equation:

$$Deaths_{HIV-TB} = \frac{D_{c,y}}{1 - D_{c,y}} Deaths_{TB}$$

where  $Deaths_{TB}$  is location-year specific deaths from the CODEm TB no-HIV model. Finally, we applied the age-sex pattern of the HIV mortality estimates to these HIV-TB deaths to generate location-year-age-sex-specific HIV-TB deaths. As the HIV-TB deaths were estimated based on the fraction of HIV-TB deaths among all TB deaths, the total number of HIV-TB deaths could exceed the total number of HIV deaths in some locations. To avoid this, we applied a cap of 45% on the fraction of HIV-TB deaths among HIV deaths, based on a review by Cox et al., 2010,<sup>2</sup> and a systematic review and meta-analysis by Ford et al., 2016.<sup>3</sup>

To split HIV-TB into MDR-HIV-TB and drug-susceptible HIV-TB, we first calculated the proportion of MDR-HIV-TB among all HIV-TB cases ( $P_{MDR-HIVc,y,a,s}$ ) for each location, year, age, and sex using the following formula:

$$P_{MDR-HIVc,y,a,s} = P_{MDRnoHIVc,y,a,s}RR_{HIV}$$

where  $P_{MDRnoHIVc,y,a,s}$  is the estimated proportion of MDR-TB among HIV-negative TB cases for each location, year, age, and sex (see MDR-TB modeling strategy for more detail) and  $RR_{HIV}$  is the relative risk of MDR-TB associated with HIV infection.

We then computed the fraction of MDR-HIV-TB deaths among all HIV-TB deaths ( $D_{MDR-HIVc,y,a,s}$ ) using the following formula:

$$D_{MDR-HIVc,y,a,s} = \frac{P_{MDR-HIVc,y,a,s} RR_{MDR}}{P_{MDR-HIVc,y,a,s} RR_{MDR} + 1 - P_{MDR-HIVc,y,a,s}}$$

where  $RR_{MDR}$  is the pooled relative risk of mortality in MDR-TB cases compared with drug-susceptible TB cases. We then applied the predicted MDR-HIV-TB death fractions to all HIV-TB death estimates to generate MDR-HIV-TB deaths by location, year, age, and sex. Next, we subtracted MDR-HIV-TB deaths from all HIV-TB deaths to generate drug-susceptible HIV-TB deaths by location, year, age, and sex.

To separate out XDR-HIV-TB from MDR-HIV-TB, we aggregated the XDR-TB cases and MDR-TB cases (with DST for second-line drugs) up to the super-region level and calculated the super-region level proportions of XDR-TB among MDR-TB cases. Next, we computed the superregion-year-specific fraction of XDR-TB deaths among all MDR-TB deaths ( $D_{XDRsr,y}$ ) using the following formula:

$$D_{XDRsr,y} = \frac{P_{XDRsr,y} RR_{XDR}}{P_{XDRsr,y} RR_{XDR} + 1 - P_{XDRsr,y}}$$

where  $RR_{XDR}$  is the pooled relative risk of mortality in XDR-TB cases compared with MDR-TB cases. These fractions were then applied to MDR-HIV-TB deaths in corresponding countries within the super-regions to produce XDR-HIV-TB deaths by location, year, age, and sex. We linearly extrapolated XDR-TB mortality rates back assuming the mortality rates were zero in 1992, one year before 1993 when XDR-TB was first recorded in USA surveillance data.<sup>4</sup> Finally, we subtracted XDR-HIV-TB deaths from MDR-HIV-TB deaths to generate MDR-HIV-TB (without extensive drug resistance) deaths by location, year, age, and sex.

## References

- 1 Mesfin YM, Hailemariam D, Biadgign S, Kibret KT. Association between HIV/AIDS and multi-drug resistance tuberculosis: a systematic review and meta-analysis. *PLoS One*. 2014 Jan 8;9(1):e82235.
- 2 Cox JA, Lukande RL, Lucas S, Nelson AM, Van Marck E, Colebunders R. Autopsy causes of death in HIV-positive individuals in sub-Saharan Africa and correlation with clinical diagnoses. *AIDS Rev* 2010; **12**: 183–94.

3 Ford N, Matteelli A, Shubber Z, *et al.* TB as a cause of hospitalization and in-hospital mortality among people living with HIV worldwide: a systematic review and meta-analysis. *J Int AIDS Soc* 2016; **19**: 20714.

4 Centers for Disease Control and Prevention (CDC). Extensively Drug-Resistant Tuberculosis --- United States, 1993—2006. *MMWR*. 2007; 56(11);250-253



## Diarrheal diseases

### Diarrheal diseases

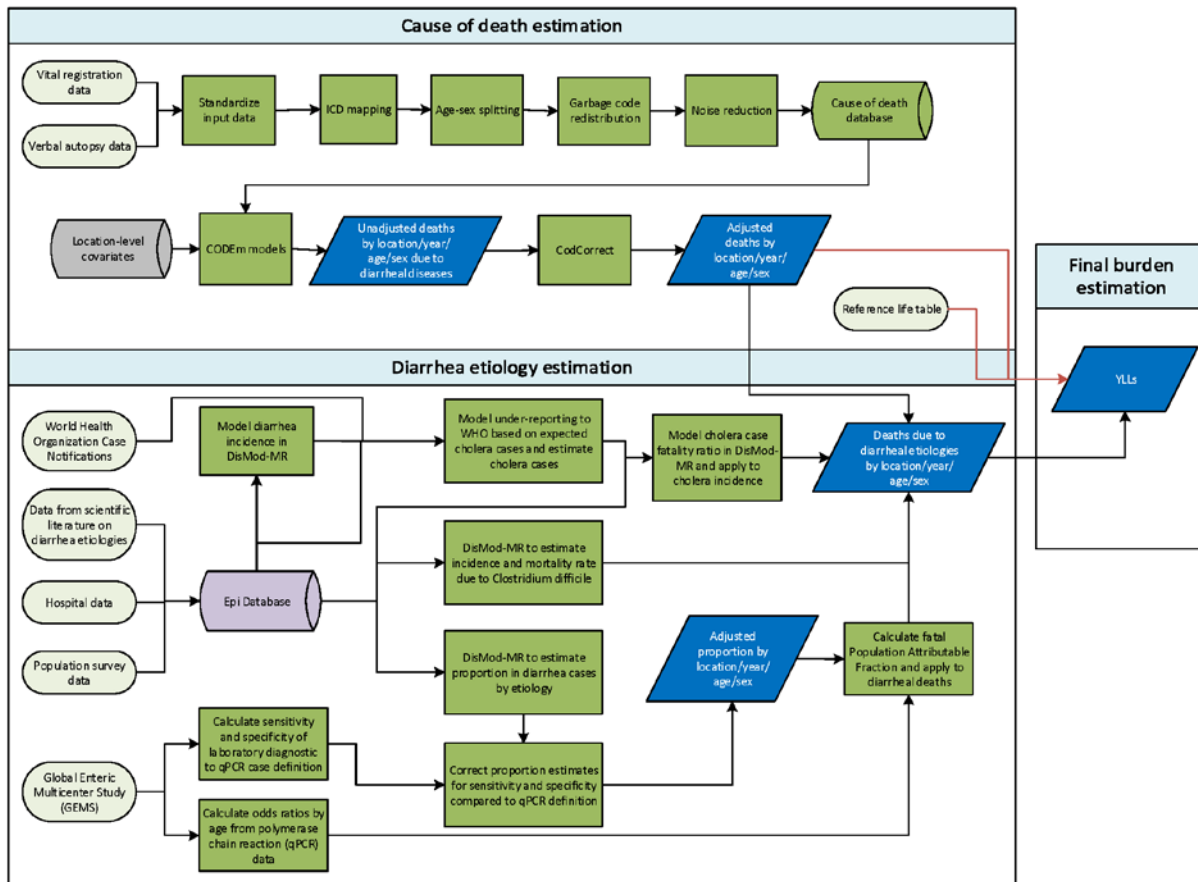

### Input data

**Cause of death.** Diarrheal disease mortality was estimated in CODEm. We estimated diarrhea mortality separately for males and females and for children under 5 years and older than 5 years. We used all available data from vital registration systems, surveillance systems and verbal autopsy (Table 1). We checked for and excluded outliers from our data by country or region. We also excluded early neonatal mortality data in the Philippines (1994–1998) and India Civil Registration System data in all states (1986–1995).

**Etiologies.** We conducted a systematic literature review for the proportion of diarrhea cases that tested positive for each etiology. We updated our review of literature to include studies published between May 2015 and May 2016. Inclusion criteria included diarrhea as the case definition, studies with a sample size of at least 100, and studies with at least one year of follow-up. We excluded studies that reported on diarrheal outbreaks exclusively and those that used acute gastroenteritis with or without diarrhea. We identified 442 studies, of which 36 met our criteria of inclusion and were included. We extracted data points for location, sex, year, and age. We assigned an age range based on the prevalence-weighted mean age of diarrhea in the appropriate year/sex/location if the age of the study participants was not reported.

We used the Global Enteric Multicenter Study (GEMS), a seven-site, case-control study of moderate-to-severe diarrhea in children under 5 years,<sup>1</sup> to calculate odds ratios for the diarrheal pathogens. We analyzed raw data for a systematic reanalysis, representative of the distribution of cases and controls by age and site, of roughly half of the 22,000 original GEMS samples that were tested for the presence of pathogen using quantitative polymerase chain reaction (qPCR).<sup>2</sup>

### **Modeling strategy**

**Cause of death.** We used country-level covariates to inform our CODEm models. We included covariates for years of education per capita, income per capita, prevalence of undernutrition (weight-for-age, weight-for-height, and height-for-age), population density above 1,000 or below 150 people per square kilometer, sanitation access, safe water access, Socio-Demographic Index, and rotavirus vaccine coverage. We evaluated our diarrheal disease cause of death models using in and out of sample predictive performance.

**Etiologies.** We estimated diarrheal disease etiologies separately from overall diarrhea mortality using a counterfactual strategy for enteric adenovirus, *Aeromonas*, *Entamoeba histolytica* (amoebiasis), *Campylobacter enteritis*, *Cryptosporidium*, typical enteropathogenic *Escherichia coli* (t-EPEC), enterotoxigenic *Escherichia coli* (ETEC), norovirus, non-typhoidal salmonella infections, rotavirus, and *Shigella*. *Vibrio cholerae* and *Clostridium difficile* were modeled separately.

Diarrheal etiologies are attributed to diarrheal deaths using a counter-factual approach. We calculated a population attributable fraction (PAF) from the proportion of severe diarrhea cases that are positive for each etiology. The PAF represents the relative reduction in diarrhea mortality if there was no exposure to a given etiology. As diarrhea can be caused by multiple pathogens and the pathogens may co-infect, PAFs can overlap and add up to more than 100%. We calculated the PAF from the proportion of severe diarrhea cases that are positive for each etiology. We assumed that hospitalized diarrhea cases are a proxy of severe and fatal cases. We used the following formula to estimate PAF:<sup>4</sup>

$$PAF = Proportion * (1 - \frac{1}{OR})$$

Where *Proportion* is the proportion of diarrhea cases positive for an etiology and *OR* is the odds ratio of diarrhea given the presence of the pathogen.

We dichotomized the continuous qPCR test result using the value of the cycle threshold (Ct) that most accurately discriminated between cases and controls. The Ct values range from 0 to 35 cycles representing the relative concentration of the target gene in the stool sample. A low value indicates a higher concentration of the pathogen while a value of 35 indicates the absence of the target in the sample. We used the lower Ct value when we had multiple Ct values for the cutpoint. The case definition for each pathogen is a Ct value that is below the established cutoff point.

We used a mixed effects conditional logistic regression model to calculate the odds ratio for under 1 year and 1-4 years old for each of our pathogens. The odds ratio for 1-4 years was applied to all GBD age groups over 5 years. There were three pathogen-age odds ratios that were not statistically significant: *Aeromonas* and Amoebiasis in under 1 year and *Campylobacter* in 1-4 years. The mean value of the odds ratio was above 1 in all three cases so we transformed the odds ratios for these three exceptions only in log-space such that exponentiated values could not be below 1. The transformation was:

$$\text{Odds ratio} = \exp(\log(\text{or}) - 1) + 1$$

We modeled the proportion data using the meta-regression tool DisMod-MR to estimate the proportion of positive diarrhea cases for each separate etiology by location/year/age/sex and to adjust for the covariates.

We used the estimated sensitivity and specificity of the laboratory diagnostic technique used in the GEMS study compared to the qPCR case definition to adjust our proportion before we computed the PAF:<sup>5</sup>

$$\text{Proportion}_{\text{True}} = \frac{(\text{Proportion}_{\text{Observed}} + \text{Specificity} - 1)}{(\text{Sensitivity} + \text{Specificity} - 1)}$$

We used this correction to account for the fact that the proportions we used are based on a new test that is not consistent with the laboratory-based case definition (qPCR versus GEMS conventional laboratory testing for pathogens).<sup>15</sup>

Our literature review extracted the proportion of any enteropathogenic *Escherichia coli* (EPEC) without differentiating between typical (tEPEC) and atypical (aEPEC). In order to be consistent with the odds ratios that we obtained, we adjusted our proportion estimates of any EPEC to typical EPEC only. This adjustment was informed by a subset of our literature review that reported both atypical and typical EPEC. We estimated a ratio by super-region of tEPEC to any EPEC and adjusted our proportion estimates accordingly. We found that the majority of EPEC diarrhea cases were positive for atypical EPEC, consistent with other published work.<sup>3</sup>

For *Vibrio cholerae* (cholera), we used the literature review to estimate expected number of cholera cases for each country-year using the incidence of diarrhoea, estimated using DisMod-MR, and the proportion of diarrhoea cases that are positive for cholera. We assigned cholera PAF using odds ratios from the qPCR results to estimate a number of cholera-attributable cases. We compared this expected number of cholera cases to the number reported to the World Health Organization at the country-year level.<sup>6</sup> We modeled the underreporting fraction to correct the cholera case notification data for all countries using health system access and the diarrhoea SEV scalar to predict total cholera cases. We used the age-specific proportion of positive cholera samples in DisMod and our incidence estimates to predict the number of cholera cases for each age/sex/year/location. Finally, we modeled the case fatality ratio of cholera using DisMod-MR and to estimate the number of cholera deaths.

For *C. difficile*, we modeled incidence and mortality in DisMod-MR for each age, sex, year, location. DisMod-MR is a Bayesian meta-regression tool that uses spatio-temporal information as priors to estimate prevalence, incidence, remission, and mortality for *C. difficile* infection. DisMod-MR uses a compartmental model to relate prevalence, incidence, remission, and mortality. We set remission in our model to 1 month.

**Table 1. Cause-specific mortality input data.**

| Type of data              | Input data               |
|---------------------------|--------------------------|
| <b>Total data sources</b> | <b>16,980 site-years</b> |
| Vital registration data   | 15,087 site-years        |
| Surveillance data         | 877 site-years           |
| Verbal autopsy data       | 1,016 site-years         |

## References

- 1 Kotloff KL, Nataro JP, Blackwelder WC, *et al.* Burden and aetiology of diarrhoeal disease in infants and young children in developing countries (the Global Enteric Multicenter Study, GEMS): a prospective, case-control study. *Lancet Lond Engl* 2013; **382**: 209–22.
- 2 Liu J, Gratz J, Amour C, *et al.* A laboratory-developed TaqMan Array Card for simultaneous detection of 19 enteropathogens. *J Clin Microbiol* 2013; **51**: 472–80.
- 3 Ochoa TJ, Barletta F, Contreras C, Mercado E. New insights into the epidemiology of enteropathogenic *Escherichia coli* infection. *Trans R Soc Trop Med Hyg* 2008; **102**: 852–6.
- 4 Miettinen OS. Proportion of disease caused or prevented by a given exposure, trait or intervention. *Am J Epidemiol* 1974; **99**: 325–32.
- 5 Reiczigel J, Földi J, Ozsvári L. Exact confidence limits for prevalence of a disease with an imperfect diagnostic test. *Epidemiol Infect* 2010; **138**: 1674–8.
- 6 World Health Organization. Global Health Observatory data repository: Cholera. 2016. <http://apps.who.int/gho/data/node.main.174?lang=en> (accessed Aug 25, 2016).

# Typhoid fever

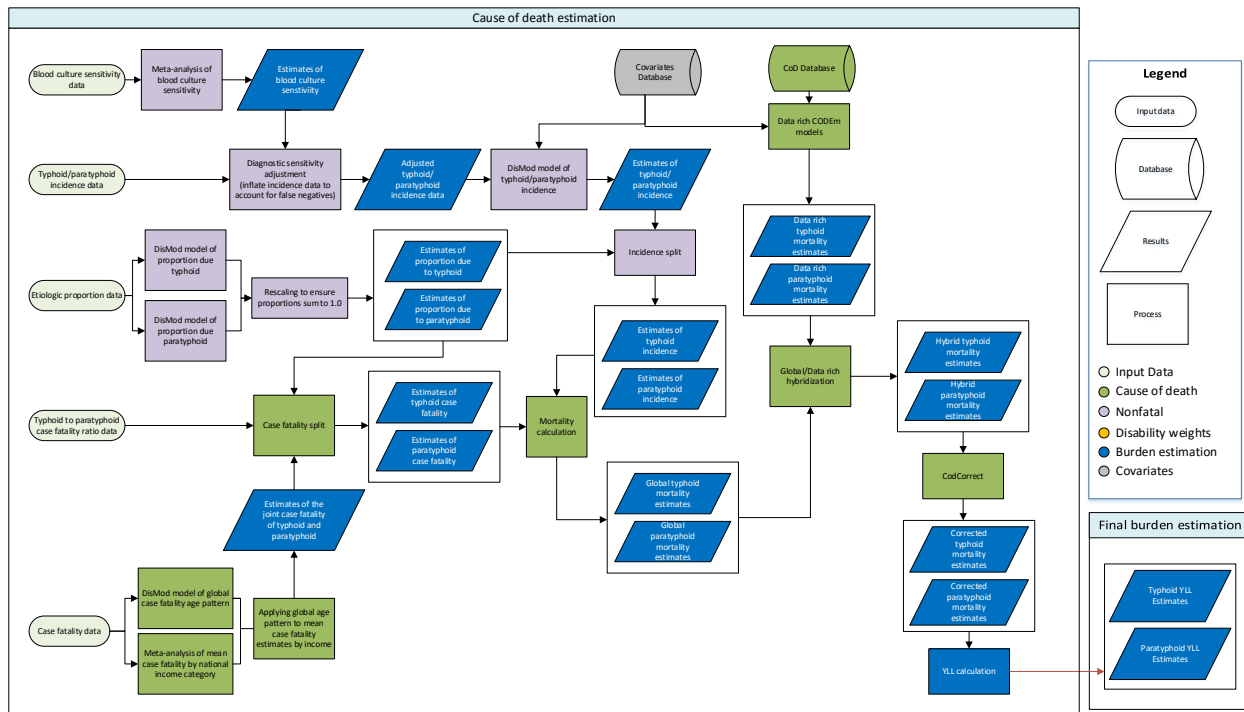

## Input data

Our incidence dataset included a combination of data from prospective cohort studies and national surveillance systems. Similarly, data on proportions due to typhoid and paratyphoid included a combination of prospective cohort studies and national surveillance systems. Case fatality data were from national surveillance systems and hospital databases.

## Modelling strategy

We model typhoid deaths using a natural history model in which we first model total incidence of typhoid and paratyphoid combined. Second, we model the proportion of this total due to typhoid and the proportion due to paratyphoid. Third, we estimate case fatality by age and national income category for typhoid and paratyphoid combined. Fourth, we use data on the relative fatality of typhoid and paratyphoid to split the joint case fatality estimates into typhoid- and paratyphoid-specific case fatality estimates. Finally, we estimate cause-specific mortality rates as the product of incidence and case fatality.

Total incidence was modelled using DisMod-MR, using the proportion of the population with access to clean water, and the proportion of the population living in the Indian Ocean monsoon belt as covariates. We performed a crosswalk using a study-level covariate indicating sources that were based on passive versus active surveillance, with active surveillance as the reference. This adjusts for incomplete case capture by passive surveillance. Incidence data were inflated to account for poor diagnostic sensitivity, based on a meta-analysis of the sensitivity of blood culture, the most common diagnostic used for

typhoid. Similarly, we used two DisMod models to estimate etiologic proportions: one for the proportion of total incidence due to typhoid, and one for the proportion due to paratyphoid.

Case fatality data were too limited to allow for a complete DisMod model, or to allow for varying estimates by time and space. We had sufficient data, however, to estimate case fatality by age and by three categories of national income. We used DisMod to extract a global age-pattern in case fatality, and meta-regression to estimate the mean case fatality by income category. Finally, we estimated the relative risk of death from typhoid relative to paratyphoid based on data from Chinese surveillance and used that relative risk to estimate case fatality separately for typhoid and paratyphoid, by age and income.

Finally, we estimated typhoid mortality as the product of total incidence, the proportion of the total due to typhoid, and case fatality for typhoid. We propagated uncertainty through every step of the modelling process by pulling 1,000 draws from the distribution of each model component (eg, incidence, proportion due to typhoid, overall case fatality, case fatality age pattern, relative fatalness of typhoid versus paratyphoid), and performing all calculations at the draw level.

We have made no substantive changes to the modelling strategy in 2016.

# Paratyphoid fever

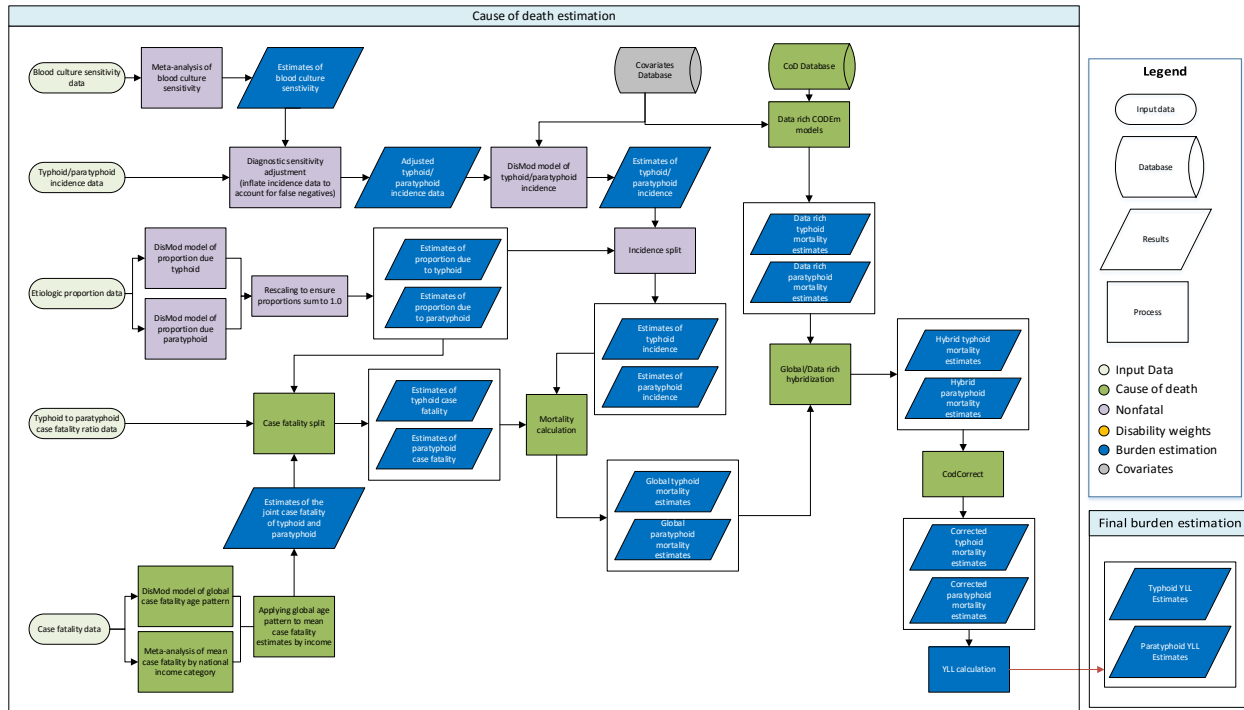

## Input data

Our incidence dataset included a combination of data from prospective cohort studies and national surveillance systems. Similarly, data on proportions due to typhoid and paratyphoid included a combination of prospective cohort studies and national surveillance systems. Case fatality data were from national surveillance systems and hospital databases.

## Modelling strategy

We model paratyphoid deaths using a natural history model in which we first model total incidence of typhoid and paratyphoid combined. For the natural history model we first model total incidence of typhoid and paratyphoid combined. Second, we model the proportion of this total due to typhoid and the proportion due to paratyphoid. Third, we estimate case fatality by age and national income category for typhoid and paratyphoid combined. Fourth, we use data on the relative fatality of typhoid and paratyphoid to split the joint case fatality estimates into typhoid- and paratyphoid-specific case fatality estimates. Finally, we estimate cause-specific mortality rates as the product of incidence and case fatality.

Total incidence was modelled using DisMod-MR, using the proportion of the population with access to clean water and the proportion of the population living in the Indian Ocean monsoon belt as covariates. We performed a crosswalk using a study-level covariate indicating sources that were based on passive versus active surveillance, with active surveillance as the reference. This adjusts for incomplete case

capture by passive surveillance. Incidence data were inflated to account for poor diagnostic sensitivity, based on a meta-analysis of the sensitivity of blood culture, the most common diagnostic used for paratyphoid. Similarly, we used two DisMod models to estimate aetiologic proportions: one for the proportion of total incidence due to typhoid, and one for the proportion due to paratyphoid.

Case fatality data were too limited to allow for a complete DisMod model, or to allow for varying estimates by time and space. We had sufficient data, however, to estimate case fatality by age and by three categories of national income. We used DisMod to extract a global age-pattern in case fatality, and meta-regression to estimate the mean case fatality by income category. Finally, we estimated the relative risk of death from typhoid relative to paratyphoid based on data from Chinese surveillance and used that relative risk to estimate case fatality separately for typhoid and paratyphoid, by age and income.

Finally, we estimated paratyphoid mortality as the product of total incidence, the proportion of the total due to paratyphoid, and case fatality for paratyphoid. We propagated uncertainty through every step of the modelling process by pulling 1,000 draws from the distribution of each model component (eg, incidence, proportion due to paratyphoid, overall case fatality, case fatality age pattern, relative fatality of typhoid versus paratyphoid), and performing all calculations at the draw level.

We have made no substantive changes to the modelling strategy in 2016.



## Other Intestinal Infectious Diseases

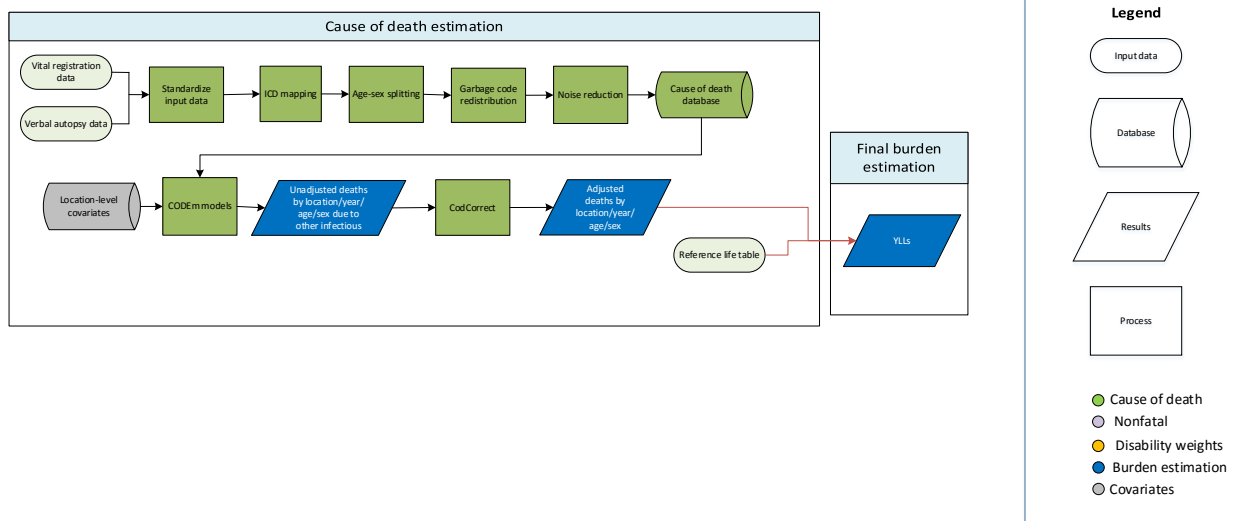

### Input data

We modelled other intestinal infectious disease mortality using all available data in the cause of death database. Data points were outliered if they reported an improbable number of deaths or if their inclusion in the model yielded distorted trends. In some cases multiple data sources for the same location differed dramatically both in their quality and reported other intestinal infectious disease mortality (eg, a verbal autopsy and vital registration source). In these cases the lower-quality data source was outliered.

### Modelling strategy

We modelled other intestinal infectious disease mortality using a custom negative-binomial model of all data in the CoD database, using the proportion of the population with access to clean water as a covariate.

Since GBD 2015 we have switched from a CODEm model to custom model for this cause to better handle the small number of deaths reported for other intestinal infectious diseases.

## Lower Respiratory Infections

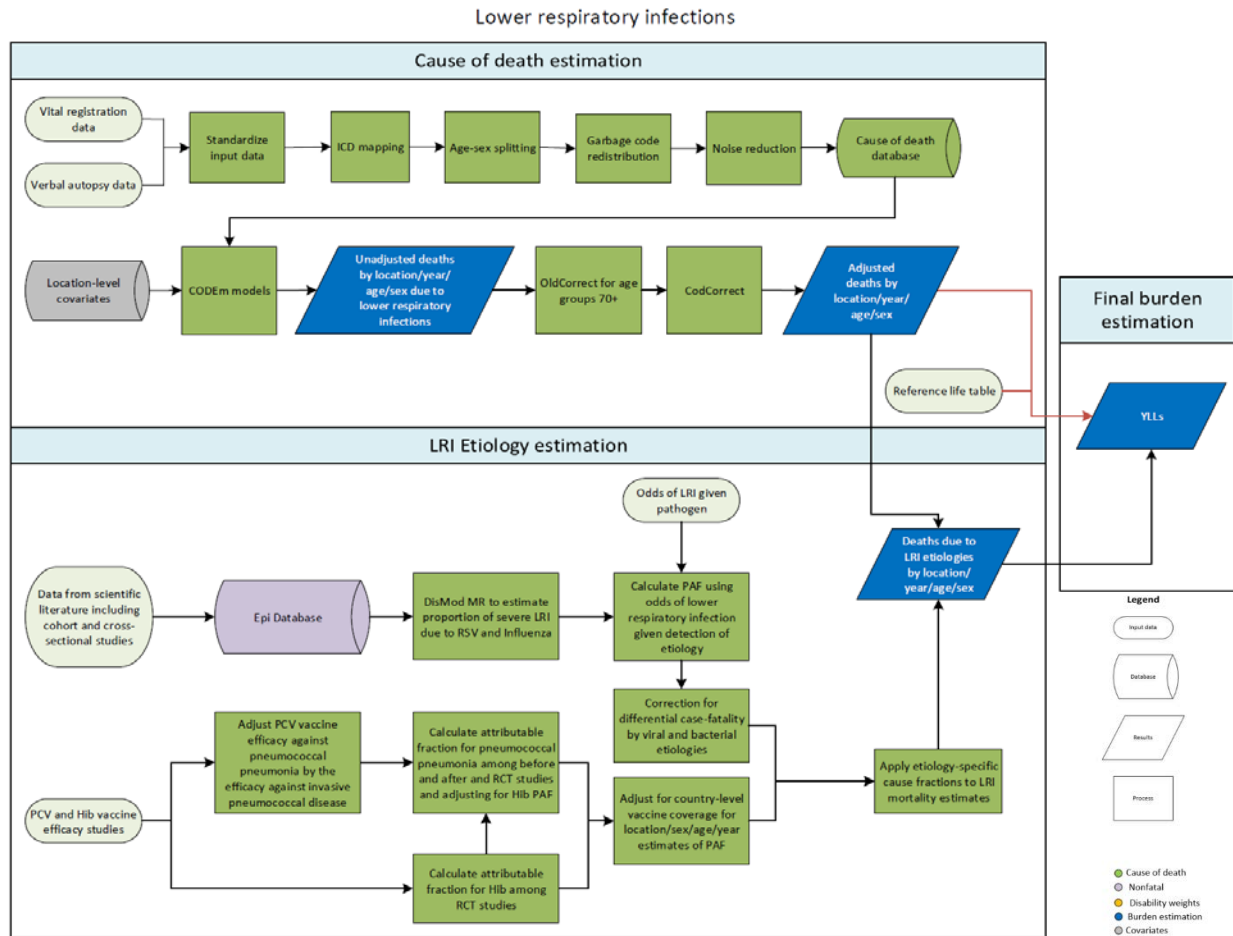

### Input data

**Cause of deaths.** Lower respiratory infection (LRI) mortality was estimated in CODEm. We estimated LRI mortality separately for males and females and for children under 5 years and older than 5 years. We used all available data from vital registration systems, surveillance systems, and verbal autopsy (**Table 1**). We checked for and excluded outliers from our data by country or region. We also excluded ICD9-coded mortality data in Sri Lanka (1982, 1987–1992), ICD9-coded neonatal mortality data in Guatemala (1980, 1981, 1984, 2000–2004), and Civil Registration System data in many Indian states (1986–1995).

**Etiologies.** We updated our systematic review of scientific literature for the proportion of LRI that tested positive for influenza and respiratory syncytial virus (RSV) to include all data from GBD 2015 and from studies published between May 2015 and May 2016. Inclusion criteria were studies that had a sample size of at least 100, studies that were at least one year in duration, and studies describing lower respiratory infections, pneumonia, or bronchiolitis as the case definition. During our literature review we identified 209 studies, of which 7 met our inclusion criteria and were extracted. We excluded studies that described pandemic H1N1 influenza solely and studies that used influenza-like illness as the case definition. We assigned an age range based on the prevalence-weighted mean age of LRI in the appropriate year/sex/location if the ages of the study participants were not reported.

We also conducted a systematic literature review of studies on the Hib vaccine and PCV effectiveness studies against X-ray-confirmed pneumonia and against pneumococcal and Hib disease until May 2016. For PCV studies, we extracted, if available, the distribution of pneumococcal pneumonia serotypes and the serotypes included in the PCV used in the study. No new studies were identified for GBD 2016. We excluded observational and case-control studies due to implausibly high vaccine efficacy estimates. Hib trial data were exclusively from children <5 years so we did not include the effect of Hib on ages over 5 years of age. PCV trial data are also frequently limited to younger age populations. To understand the contribution of pneumococcal pneumonia in older populations, we also included PCV efficacy studies that used before-after approaches.

### **Modeling strategy**

**Cause of death.** We used country-level covariates to inform our CODEm models. We included the following covariates in our LRI models: diphtheria-tetanus-pertussis vaccine coverage, years of education per capita, health system access, income per capita, prevalence of children malnutrition (<2 standard deviations below global mean of weight for age), prevalence of exposure to indoor air pollution (solid fuel use), outdoor air pollution level of PM<sub>2.5</sub>, smoking prevalence, pneumococcal conjugate vaccine (PCV) coverage, *Haemophilus influenzae* type B (Hib) vaccine coverage, access to improved water, access to improved sanitation, and Socio-Demographic Index. We evaluated our LRI cause of death models using in and out of sample predictive performance.

Like all models of mortality in GBD, LRI mortality models are single-cause, requiring in effect that the sum of all mortality models must be equal to the all-cause mortality envelope. We correct LRI mortality estimates, and other causes of mortality, by re-scaling them according to the uncertainty around the cause-specific mortality rate. This process is called CoDCorrect and is essential to ensure internal consistency among causes of death. Before CoDCorrect, we also adjust LRI mortality for unreliable estimates due to improper death certification and ICD coding among elderly adults where the underlying cause of death should be Alzheimer's or Parkinson's diseases. This process scales LRI mortality among adult age groups 70+ years into a new envelope without Alzheimer's and Parkinson's. Further details can be found in section 4 of the appendix.

**Etiologies.** We estimated LRI etiologies separately from overall LRI mortality using two distinct counterfactual modeling strategies to estimate population attributable fractions (PAFs), described in detail below. The PAF represents the relative reduction in LRI mortality if there was no exposure to a given etiology. As LRIs can be caused by multiple pathogens and the pathogens may co-infect, PAFs can overlap and add up to more than 100%. Separate strategies were used for viral- influenza and respiratory syncytial virus (RSV)- and bacterial- *Streptococcus pneumoniae* and *Haemophilus influenzae* type B- etiologies. We did not attribute etiologies to neonatal pneumonia deaths due to a dearth of reliable data in this age group. We calculated uncertainty of our PAF estimates from 1,000 draws of each parameter using normal distributions in log space.

**Influenza and RSV.** We calculated the population attributable fraction (PAF) from the proportion of severe LRI cases positive for influenza and RSV. We assumed that hospitalized LRI cases are a proxy of severe cases. We used the following formula to estimate PAF:<sup>1</sup>

$$\text{PAF} = \text{Proportion} * (1-1/\text{OR})$$

Where *Proportion* is the proportion of LRI cases that test positive for influenza or RSV and *OR* is the odds ratio of LRI given the presence of the pathogen. We used an odds ratio of 5.1 (3.19 – 8.14) for influenza and 9.79 (4.98 – 19.27) for RSV from a recently published meta-analysis.<sup>2</sup> These odds ratios are marginally different from those used in GBD 2013.

We modeled the proportion data using the meta-regression tool DisMod-MR to estimate the proportion of LRI cases that are positive for influenza and RSV, separately, by location/year/age/sex. We accounted for study-level covariates in our models such as PCR as the diagnostic technique, studies that investigated RSV or influenza exclusively, and studies from inpatient populations.

As the case-fatality of viral causes of pneumonia is lower than for bacterial causes, we adjusted for differential case-fatality by determining the etiological fractions for mortality attributable to RSV and influenza (**Table 2**). We measured the etiologic fractions by applying a relative case-fatality adjustment based on in-hospital case-fatality, which we coded to specific pneumonia etiologies. Hospital admissions data of this type were limited to data from the USA, Austria, Brazil, and Mexico. We generated the pooled estimate of the case-fatality differential between bacterial (pneumococcus, Hib) and viral etiologies (RSV, influenza) using DisMod-MR.

***Pneumococcal pneumonia and Hib.*** For *Streptococcus pneumoniae* (pneumococcal pneumonia) and *Haemophilus influenzae* type B (Hib), we calculated the population attributable fraction using a vaccine probe design.<sup>3,4</sup> The ratio of vaccine effectiveness against nonspecific pneumonia to pathogen-specific disease represents the fraction of pneumonia cases attributable to each pathogen.

To estimate the PAF for Hib and pneumococcal pneumonia, we calculated the ratio of vaccine effectiveness against nonspecific pneumonia to pathogen-specific pneumonia (Equations 1 and 3). We estimated a study-level estimate of PAF from a meta-analysis of these ratios. To estimate the PAF for Hib, we only used randomized controlled trials because of implausibly high values of vaccine efficacy in case-control studies. To estimate the PAF for pneumococcal pneumonia, we included RCTs and before and after vaccine introduction longitudinal studies.

We adjusted the study-level PAF estimate by vaccine coverage and expected vaccine performance to estimate country- and year-specific PAF values. For pneumococcal pneumonia, we adjusted the PAF by the final Hib PAF estimate and by vaccine serotype coverage. Finally, we used an age distribution of PAF modeled in DisMod to determine the PAF by age. Because of an absence of data describing vaccine efficacy against Hib in children older than two years, we did not attribute Hib to episodes of LRI in ages five years and older.

We used a vaccine probe design to estimate the PAF for pneumococcal pneumonia and (Hib) by first calculating the ratio of vaccine effectiveness against nonspecific pneumonia to pathogen-specific pneumonia at the study level (Equations 1 and 2).<sup>3-5</sup> We then adjusted this estimate by vaccine coverage and expected vaccine performance to estimate country- and year-specific PAF values (Equations 3 and 4).

$$1) \text{ HibPAF}_{Base} = 1 - \frac{VE_{Pneumonia}}{VE_{Hib}}$$

$$2) \text{ PneumoPAF}_{Base} = 1 - \frac{VE_{Pneumonia} * (1 - PAF_{Hib} * VE_{Hib \text{ Optimal}})}{VE_{Streptococcus} * Cov_{Serotype}}$$

$$3) PAF_{Hib} = PAF_{Base} * \frac{(1 - Cov_{Hib} * VE_{Hib\ Optimal})}{(1 - PAF_{Base} * Cov_{Hib} * VE_{Hib\ Optimal})}$$

$$4) PAF_{Pneumo} = \frac{PAF_{Base} * (1 - Cov_{PCV} * VE_{PCV\ Optimal})}{(1 - PAF_{Hib} * Cov_{Hib} * VE_{Hib\ Optimal}) * \left(1 - \frac{PAF_{Base} * Cov_{PCV} * VE_{PCV\ Optimal}}{(1 - PAF_{Hib} * Cov_{Hib} * VE_{Hib\ Optimal})}\right)}$$

Where  $VE_{Pneumonia}$  is the vaccine efficacy against nonspecific pneumonia,  $VE_{Hib}$  is the vaccine efficacy against invasive Hib disease,  $VE_{Streptococcus}$  is the vaccine efficacy against serotype-specific pneumococcal pneumonia,  $Cov_{serotype}$  is the serotype-specific vaccine coverage for PCV,<sup>6</sup>  $VE_{Hib\ Optimal}$  is the Hib effectiveness in the community (0.8)<sup>7</sup>,  $PAF_{Hib}$  is the final PAF for Hib,  $Cov_{PCV}$  is the PCV coverage,  $Cov_{Hib}$  is the Hib coverage by country, and  $VE_{PCV\ Optimal}$  is the vaccine effectiveness in the community (0.8).<sup>8</sup>

For Hib, we assumed that the vaccine efficacy against invasive Hib disease is the same against Hib pneumonia. For pneumococcal pneumonia, a recent study in adults<sup>9</sup> found that the vaccine efficacy against invasive pneumococcal disease may be significantly higher than against pneumococcal pneumonia. We used this ratio to adjust estimates of vaccine efficacy against invasive pneumococcal disease from other studies. However, recognizing that the study is unique in that it uses a urine antigen test among adults, we added uncertainty around our adjustment using a wide uniform distribution (median 0.65, 0.3-1.0). This has increased the estimates of pneumococcal pneumonia mortality in a meaningful way.

There are no major changes to the cause of death estimation strategy for LRI or its etiologies from GBD 2015 to GBD 2016.

**Table 1. Summary of cause-specific mortality modeling input data.**

| Type of data            | Input data        |
|-------------------------|-------------------|
| Total data sources      | 12,155 site-years |
| Vital registration data | 10,312 site-years |
| Surveillance data       | 928 site-years    |
| Verbal autopsy data     | 915 site-years    |

**Table 2: The median values for the ratio of viral to bacterial pneumonia case fatality ratio by age is shown.** These estimates are modeled using hospital-based, ICD-coded admissions and mortality for etiology-specified pneumonia. Values in parentheses represent 95% Uncertainty Interval.

| Age Group      | Ratio            |
|----------------|------------------|
| Early Neonatal | 0.34 (0.19-0.58) |
| Late Neonatal  | 0.34 (0.19-0.58) |
| Post Neonatal  | 0.34 (0.19-0.58) |
| 1 to 4         | 0.28 (0.16-0.44) |
| 5 to 9         | 0.31 (0.15-0.56) |
| 10 to 14       | 0.33 (0.19-0.53) |
| 15 to 19       | 0.37 (0.2-0.64)  |
| 20 to 24       | 0.46 (0.12-1.16) |
| 25 to 29       | 0.44 (0.17-0.93) |
| 30 to 34       | 0.46 (0.22-0.83) |
| 35 to 39       | 0.5 (0.22-1)     |
| 40 to 44       | 0.61 (0.13-1.75) |
| 45 to 49       | 0.5 (0.21-0.99)  |
| 50 to 54       | 0.44 (0.23-0.74) |
| 55 to 59       | 0.42 (0.21-0.75) |
| 60 to 64       | 0.42 (0.15-0.95) |
| 65 to 69       | 0.39 (0.19-0.7)  |
| 70 to 74       | 0.38 (0.21-0.61) |
| 75 to 79       | 0.37 (0.2-0.62)  |
| 80 to 84       | 0.37 (0.17-0.71) |
| 85 to 89       | 0.34 (0.19-0.59) |
| 90 to 94       | 0.33 (0.16-0.61) |
| 95 to 99       | 0.34 (0.13-0.8)  |

## References

- 1 Miettinen OS. Proportion of disease caused or prevented by a given exposure, trait or intervention. *Am J Epidemiol* 1974; **99**: 325–32.
- 2 Shi T, McLean K, Campbell H, Nair H. Aetiological role of common respiratory viruses in acute lower respiratory infections in children under five years: A systematic review and meta-analysis. *J Glob Health* 2015; **5**: 10408.
- 3 Feikin DR, Scott JAG, Gessner BD. Use of vaccines as probes to define disease burden. *Lancet Lond Engl* 2014; **383**: 1762–70.

- 4 O'Brien KL, Wolfson LJ, Watt JP, *et al.* Burden of disease caused by *Streptococcus pneumoniae* in children younger than 5 years: global estimates. *Lancet Lond Engl* 2009; **374**: 893–902.
- 5 Watt JP, Wolfson LJ, O'Brien KL, *et al.* Burden of disease caused by *Haemophilus influenzae* type b in children younger than 5 years: global estimates. *Lancet Lond Engl* 2009; **374**: 903–11.
- 6 Johnson HL, Deloria-Knoll M, Levine OS, *et al.* Systematic evaluation of serotypes causing invasive pneumococcal disease among children under five: the pneumococcal global serotype project. *PLoS Med* 2010; **7**. DOI:10.1371/journal.pmed.1000348.
- 7 Swingle G, Fransman D, Hussey G. Conjugate vaccines for preventing *Haemophilus influenzae* type B infections. *Cochrane Database Syst Rev* 2007; : CD001729.
- 8 Lucero MG, Dulalia VE, Nillos LT, *et al.* Pneumococcal conjugate vaccines for preventing vaccine-type invasive pneumococcal disease and X-ray defined pneumonia in children less than two years of age. *Cochrane Database Syst Rev* 2009; : CD004977.
- 9 Bonten MJM, Huijts SM, Bolkenbaas M, *et al.* Polysaccharide conjugate vaccine against pneumococcal pneumonia in adults. *N Engl J Med* 2015; **372**: 1114–25.

## Upper respiratory infections

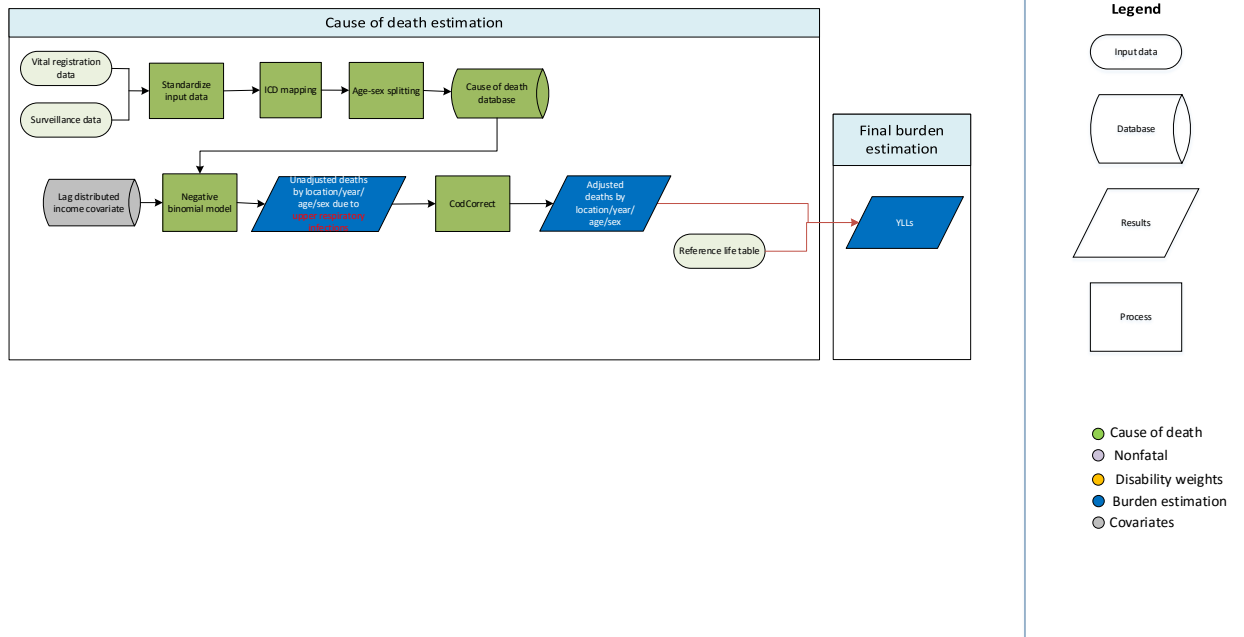

### Input data

Vital registration and surveillance data from the cause of death database were used. Data with very high cause fractions (those greater than the 99th percentile values) were excluded in the regression.

### Modeling strategy

Due to a small number of deaths, mortality from upper respiratory infections was modeled using a negative binomial regression, which is more appropriate than a Poisson count model as it accounts for greater variance (over-dispersion) in the data. By utilizing the exposure option in Stata, we model cause fractions with a negative binomial model. We tested both rate- and cause fraction-based models but selected a cause fraction model due to better model performance. Using the input data mentioned above, we modeled mortality from upper respiratory infections using the lag distributed income covariate and age dummy variables and the exposure set to the total number of deaths in the study. Uncertainty was estimated by taking 1,000 iterations of the predictions based on the variance covariance matrix and a random sample from a gamma distribution. The fit of the model was evaluated using diagnostic plots of predicted versus observed values.



# Otitis Media

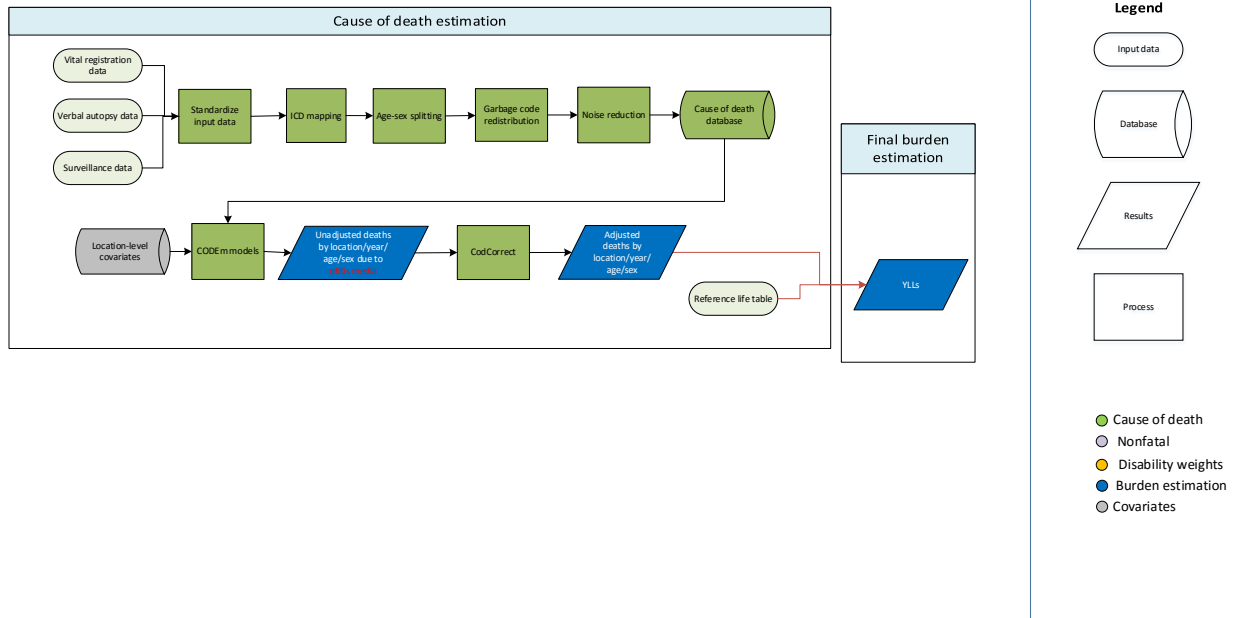

## Input data

Vital registration, verbal autopsy, and surveillance data were used. We outliered data that were largely conflicting with the majority of data from other studies conducted either in the same or different countries (with similar socio-demographic characteristics) in the same region.

## Modelling strategy

A general CODEm modelling strategy was used. There were no substantive changes from GBD 2015 in terms of modelling strategy.

## Meningitis

Causes included in this write-up: Meningitis (total), meningococcal meningitis, pneumococcal meningitis, Haemophilus influenza type B meningitis, and other meningitis

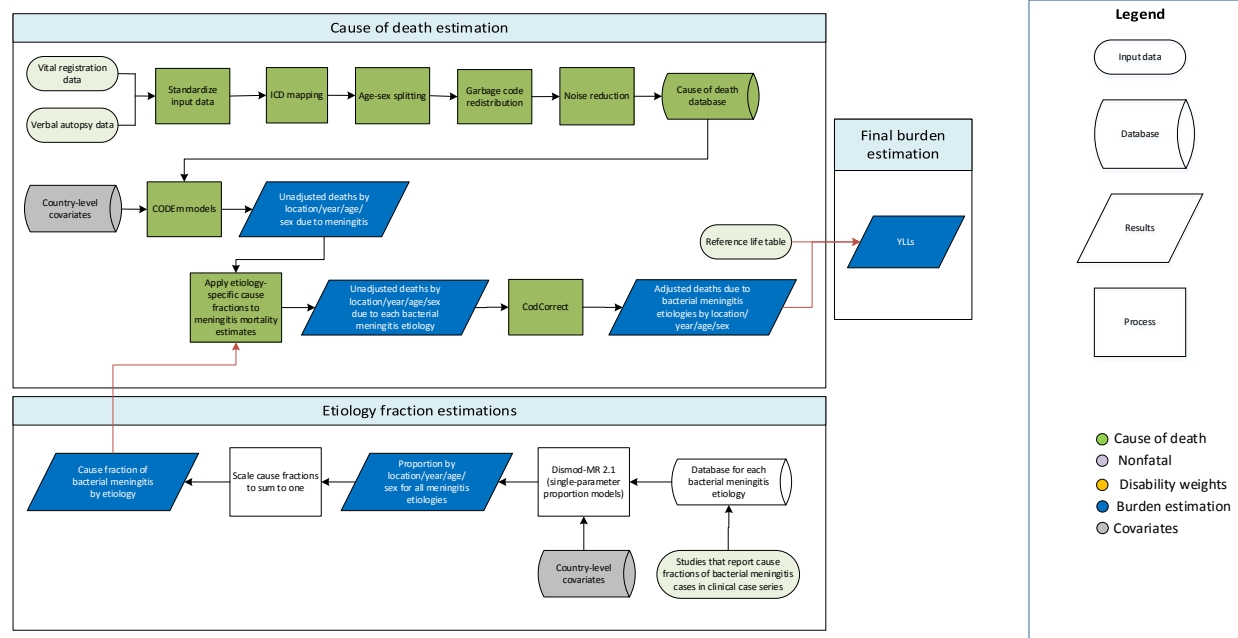

### Input data

Input data for the overall meningitis model came from the cause of death database, which includes vital registration (VR) and verbal autopsy (VA) data. We outliered data in instances where garbage code redistribution and noise reduction, in combination with small sample sizes, resulted in unreasonable cause fractions when compared to regional, super-regional, and global rates, and data that violated well-established time or age trends. Outliering methods were consistent across both VR and VA data.

Input data that informed the aetiology splits for meningitis came from cause-specific VR mortality proportions, as well as a systematic review completed for the first time in GBD 2016. Previously, aetiologic attribution of meningitis deaths was informed by the proportion of incident cases due to each class of pathogen rather than the proportion of deaths. Viral meningitis mortality is rare except in the youngest age groups and is included with “other meningitis.”

For GBD 2016, we conducted a new systematic literature review on meningitis mortality aetiologies with the following search string:

((("Meningitis"[MeSH] OR "Meningitis, pneumococcal"[MeSH] OR "Meningitis, Haemophilus"[MeSH] OR "Meningitis, Meningococcal"[MeSH] OR "Meningitis, viral"[MeSH] OR "Meningitis"[Title/Abstract]) AND ("etiology"[Title/Abstract] OR "causes" Title/Abstract] OR "cause pattern"[Title/Abstract] OR "aetiology"[Title/Abstract] OR "cause"[Title/Abstract]) AND ("fatality"[Title/Abstract] OR "mortality"[Title/Abstract] OR "death"[Title/Abstract]) AND 1985/01/01[PDAT]:3000/12/31[PDAT]) AND "humans"[MeSH])

The search yielded 1,290 hits, of which over 400 were reviewed and 20 were extracted for use in GBD 2016 modelling.

### **Modelling strategy**

We modelled deaths due to all bacterial meningitis with two CODEm models, separately for each sex and two age categories – under-5 and 5 years and above – because the mortality trends differ substantially between children and adults, and there are a significant number of data sources that only have data for under-5-year-olds. The two models used the same covariates and otherwise standard CODEm parameters. The final sex-specific models for deaths due to all bacterial meningitis were a hybridized model of separate global and data-rich models for males and females.

To obtain estimates for each of the four aetiologies of bacterial meningitis – meningococcal, pneumococcal, H influenza type B, and other bacterial – we ran separate proportion models in DisMod-MR 2.2 using VR proportion and systematic review data. The meningococcal meningitis proportion model used two country-level covariates to inform the model – proportion of the population living within the meningitis belt, and proportion of the population covered by the meningococcal meningitis type A vaccine (an initiative called Menafrivac). The pneumococcal meningitis model was informed by PCV3 vaccine coverage, and the H influenza type B meningitis model was informed by HiB3 vaccine coverage. The other meningitis proportion model did not use any country-level covariates.

Since DisMod-MR 2.2 estimates in 5-year intervals, the aetiological proportions for years between the intervals were interpolated at the draw level. The four proportion models were scaled to 1 at the draw level for each location, year, sex, and age combination. We applied these proportions to the total meningitis cause of death models to produce estimates for each of the four etiologies. We used the GBD shared function `split_cod_model` to complete this proportional split into the four etiologies of meningitis currently modeled. This is a new methodological approach for GBD 2016, which we hope to further refine for GBD 2017.

## Encephalitis

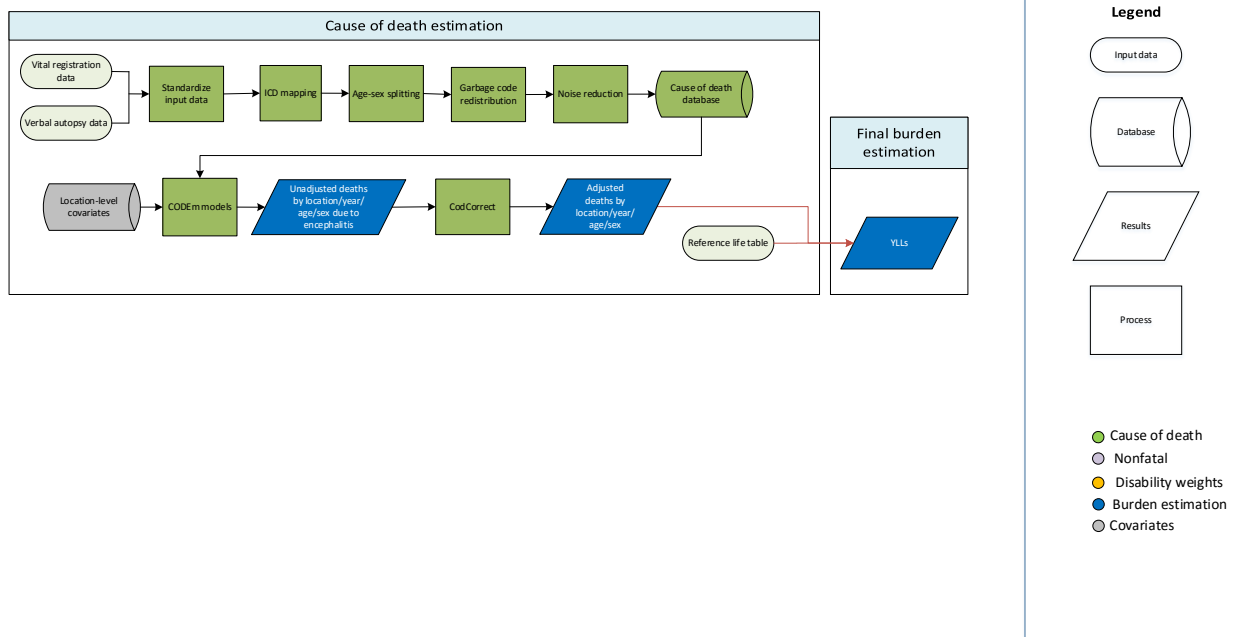

### Input data

For GBD 2016, vital registration (VR) and verbal autopsy (VA) data were used to model this cause. We outliered data in instances where garbage code redistribution and noise reduction, in combination with small sample sizes, resulted in unreasonable cause fractions when compared to regional, super-regional, and global rates, and data that violated well-established time or age trends. Outliering methods were consistent across both vital registration and verbal autopsy data.

### Modelling strategy

We modelled deaths due to encephalitis with a standard CODEm model using the cause of death database and location-level covariates as inputs. We hybridized separate global and data-rich models to acquire unadjusted results, which were adjusted using CodCorrect to reach final years of life lost (YLLs) due to encephalitis.

In GBD 2013, the encephalitis model was modelled using two age categories – under-5 and 5 years and above – because the mortality trends differed substantially between children and adults and a significant number of data sources only had data for under-5-year-olds. With the addition of new data sources for GBD 2015, this modelling process was deemed unnecessary and the encephalitis model covered the entire age range. Another significant change was the addition of the Japanese encephalitis covariate, which is a binary covariate indicating if the location is known to be endemic for Japanese encephalitis. The covariate was modelled according to data from the Centers for Disease Control and Prevention.<sup>1</sup>

We made no other significant changes to input data or modelling strategy for GBD 2016.

## Reference

- 1 Centers for Disease Control (CDC). CDC health information for international travel 2016: the yellow book. New York City, United States: Oxford University Press, USA, 2016.

# Diphtheria

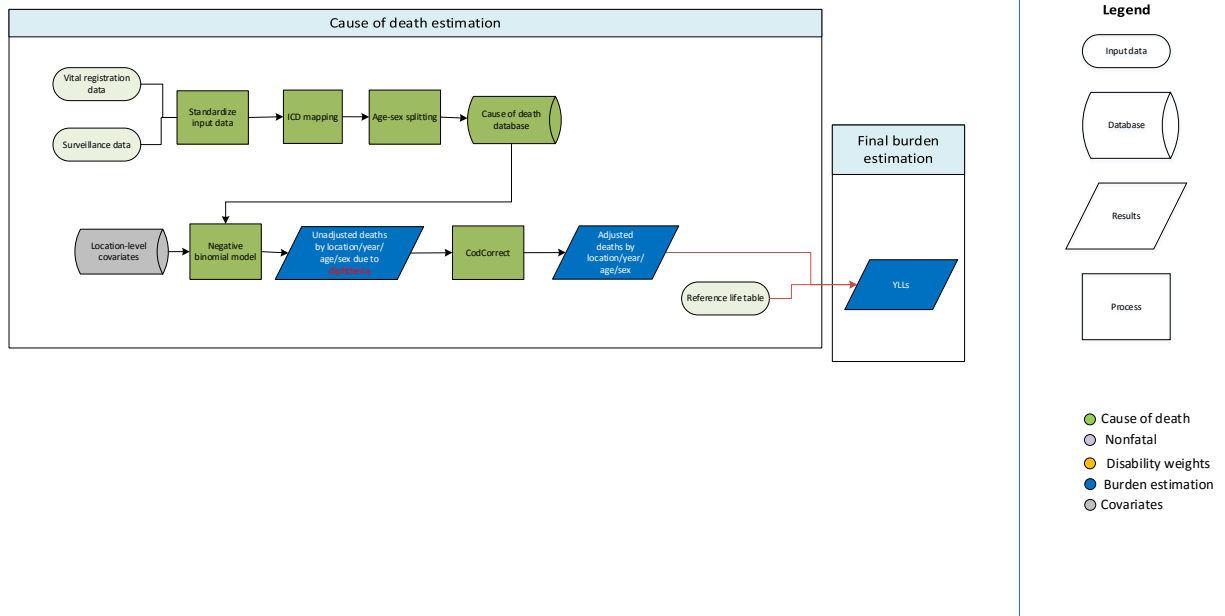

## Input data

Vital registration and surveillance data from the cause of death database were used. Data with very high cause fractions (those greater than the 99th percentile values) were excluded in the regression.

## Modeling strategy

Due to the small number of deaths, diphtheria mortality was modeled using a negative binomial regression, which is more appropriate than a Poisson count model as it accounts for greater variance (over-dispersion) in the data. Using the input data mentioned above, we modeled mortality due to diphtheria with the diphtheria-pertussis-tetanus third-dose (DPT3) vaccine coverage covariate and age dummy variables, with the offset as the total number of deaths in the study. Uncertainty was estimated by taking 1,000 iterations of the predictions based on the variance-covariance matrix and a random sample of the dispersion parameter from a gamma distribution.

## Pertussis (whooping cough)

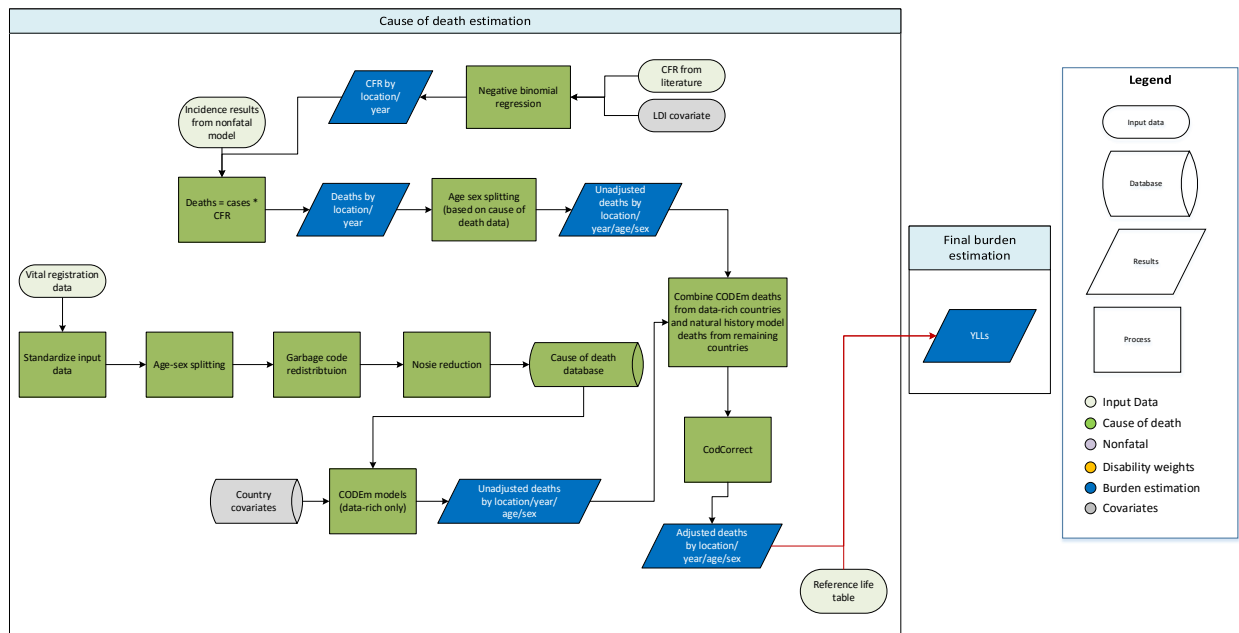

### Input data

Vital registration data from the cause of death database were used for data-rich countries. To inform the natural history model, we used data from the following sources: World Health Organization (WHO) case notifications; historical case notifications for the United Kingdom back to 1940; case fatality data identified by collaborators; and case fatality data identified through systematic literature reviews for GBD 2010, GBD 2013, and GBD 2016. The PubMed search query for GBD 2016 was: (whooping cough [Title/Abstract]) OR (pertussis [Title/Abstract]) AND (case fatality [Title/Abstract]) AND ("2013"[Date - Publication]: "2016"[Date - Publication]). Studies were included if they reported case fatality rate, number of deaths, and number of cases. Studies were excluded if they included non-representative samples only.

### Modeling strategy – data-rich countries

Mortality was modeled separately for data-rich and other countries. For data-rich countries (i.e., countries with vital registration more than 95% complete for more than 25 years), we used a general CODEm strategy with DTP3 vaccination coverage, lagged distributed income, and education as country-level covariates. We made estimations for the age range post-neonatal to 59 years.

### Modeling strategy – other countries

For the remaining countries, we used a natural history-based model because CODEm does not predict well for those countries. First, we modeled log-transformed incidence with a mixed-effects linear regression of case notifications from the WHO (1985-2015) on diphtheria-tetanus-pertussis dose 3 (DTP3) vaccination coverage. Historical data of United Kingdom (UK) pertussis cases and UK DTP3 coverage rates (both back to 1940) were also used to inform the incidence model. The random effect by

country allowed for registration completeness to vary by country. The results of this model were then used to predict incidence as a function of vaccine coverage. To correct for underreporting in case notifications, we used a value of the random effect that matched the highest random effect in a high income region—Switzerland (which has a pertussis monitoring system which captures a high percentage of cases)—to get an implied attack rate assumed to be the same for all unvaccinated populations. Uncertainty was estimated by taking 1,000 iterations of the predictions based on the variance-covariance matrix.

Second, we modeled the pertussis case fatality rate using a negative binomial model with the health system access and lagged-distributed income covariates. Uncertainty was estimated by taking 1,000 iterations of the predictions based on the variance-covariance matrix and a random sample from a gamma distribution of the dispersion parameter. Finally, whooping cough deaths were calculated at the 1,000-draw level as

$$deaths = incidence * CFR .$$

We estimated overall number of deaths and then assigned an age-sex distribution based on the age- and sex-specific patterns found in the cause of death data. We made estimations for the age range post-neonatal to 59 years.



# Tetanus

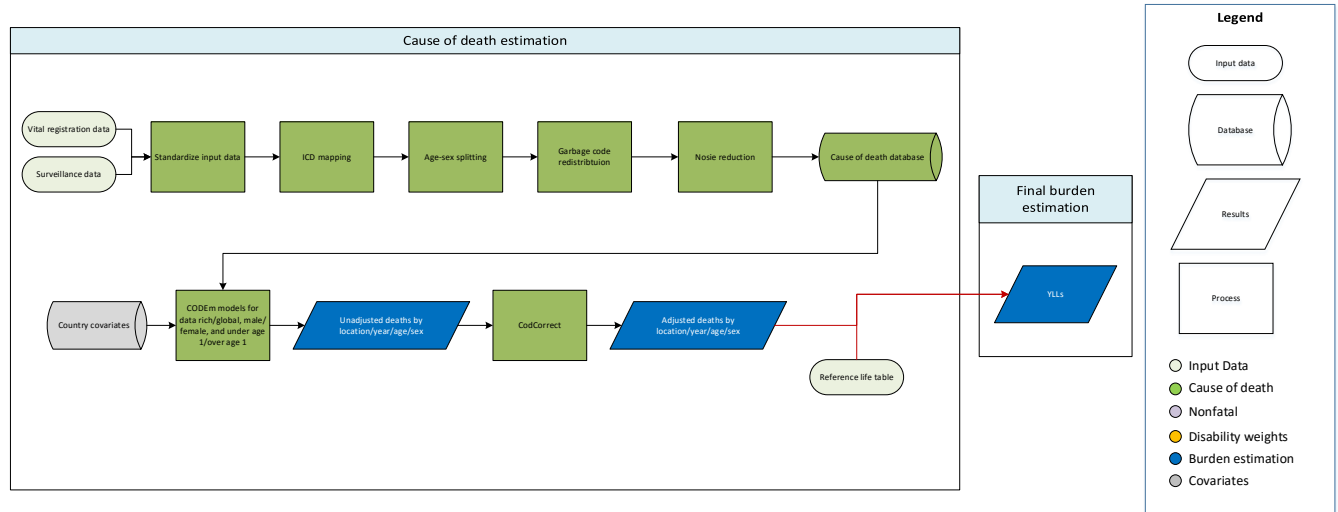

## Input data

Mortality data from vital registration, verbal autopsy, and surveillance sources were used. Data were outliered if they largely conflicted with the majority of data from other studies conducted either in the same or different countries with similar sociodemographic characteristics in the same region.

## Modeling strategy

A general CODEm modeling strategy was used. We ran separate models for under 1 year and 1 to 95+ years. There were no substantive changes in modeling strategy from GBD 2015.

## Measles

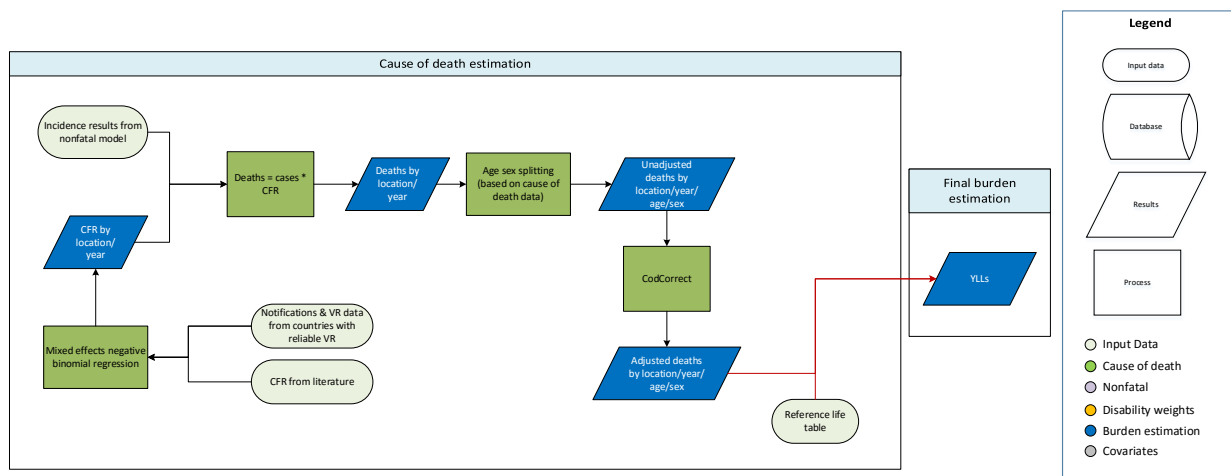

### Input data

Vital registration data from the cause of death database were used for data-rich countries. To inform the natural history model, we used data from the following sources: World Health Organization (WHO) case notifications from 1995 to 2015; case notifications identified by collaborators; vital registration (VR) data in countries in the following three super-regions: high-income, Central Europe/Eastern Europe/Central Asia, and Latin America and Caribbean; and case fatality data identified through systematic literature reviews for GBD 2010, GBD 2013, and GBD 2016. The PubMed search query for GBD 2016 was: (measles [Title/Abstract]) AND (case fatality [Title/Abstract]) AND ("2013"[Date - Publication]: "2016"[Date - Publication]). Studies were included if they reported case fatality rate, number of deaths, and number of cases. Studies were excluded if they included non-representative samples only.

### Modeling strategy – data-rich countries

Mortality was modeled separately for data-rich and other countries. For data-rich countries (i.e., countries with vital registration more than 95% complete for more than 25 years), we used a general CODEm strategy to model VR data with measles-containing vaccination dose one (MCV1) coverage, childhood malnutrition, lagged distributed income the healthcare access and quality index, and education as country-level covariates. We made estimations for the age range post-neonatal to 59 years.

### Modeling strategy – other countries

Measles mortality in the remaining countries was modeled using a natural-history-based model. First, we modeled measles incidence with a mixed-effects linear regression of case notifications from the WHO (1995-2015) on routine measles vaccination rates and supplementary immunization activities (SIAs). More precisely, log-transformed incidence rates were regressed on the log of the proportion unvaccinated with first- and second-dose measles-containing vaccine, and additional SIA coverage lagged by one, two, three, four, and five years, with super-region, region, and country-level random effects. The results of this mixed effects regression model were then used to predict location-year-

specific incidence as a function of routine vaccine coverage and SIAs. To correct for underreporting in case notifications, we added the effect of a 95% attack rate, assumed to be the same across all unvaccinated populations. Uncertainty was estimated by taking 1,000 iterations of the predictions based on the variance-covariance matrix. For locations in three super-regions—high-income, Central Europe/Eastern Europe/Central Asia and Latin America and Caribbean—we used reported measles cases as incident cases.

Second, the case fatality rate was modeled using a mixed effects negative binomial regression with the child malnutrition covariate and study-level indicators (hospital-based or not; outbreak or not; and rural or urban/mixed), with country random effects. Uncertainty was estimated by taking 1,000 iterations of the predictions based on the variance-covariance matrix and uncertainty in country random effects. The fit of the model was evaluated using diagnostic plots of predicted versus observed values. Finally, estimated deaths were calculated at the 1,000-draw level as

$$deaths = incidence * CFR .$$

We estimated overall number of deaths and then assigned an age-sex distribution based on the age- and sex-specific patterns found in the cause of death data. We made estimations for the age range post-neonatal to 59 years.

# Varicella

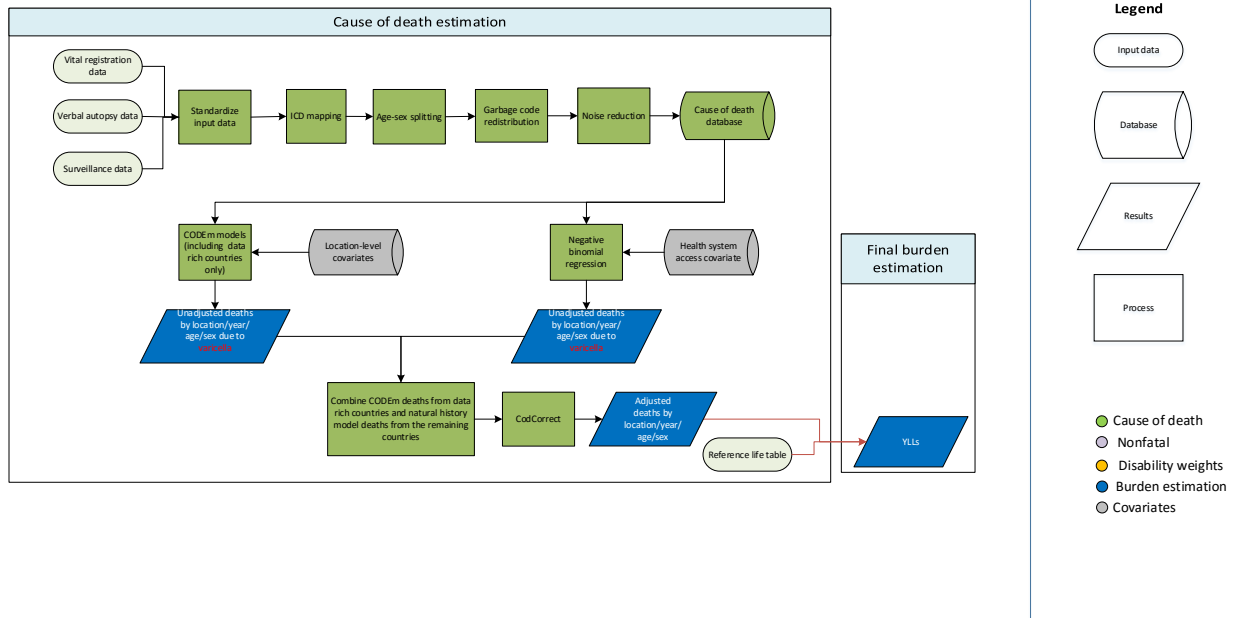

## Input data

Vital registration, verbal autopsy and surveillance data from the cause of death database were used. Data with very high cause fractions (those greater than the 99th percentile values) were excluded in the negative binomial regression.

## Modeling strategy

Mortality was modeled two ways. For data-rich countries (i.e., countries with vital registration more than 95% complete for more than 25 years), we used a general CODEm strategy. For the remaining countries, since CODEm did not predict well in data-sparse areas, we used a negative binomial regression to model varicella cause fraction. Using the input data mentioned above, we modeled mortality due to varicella using the healthcare access and quality index and age dummy variables with the offset set to the location-year-age-sex-specific population. Uncertainty was estimated by taking 1,000 iterations of the predictions based on the variance-covariance matrix and a random sample of the dispersion parameter from a gamma distribution.

In GBD 2013, we used a negative binomial regression to model varicella mortality for all countries. For GBD 2015, we switched to using CODEm for data-rich countries because it fit the data better in those countries. There were no significant changes in modeling strategy for GBD 2016 from GBD 2015.

# Malaria

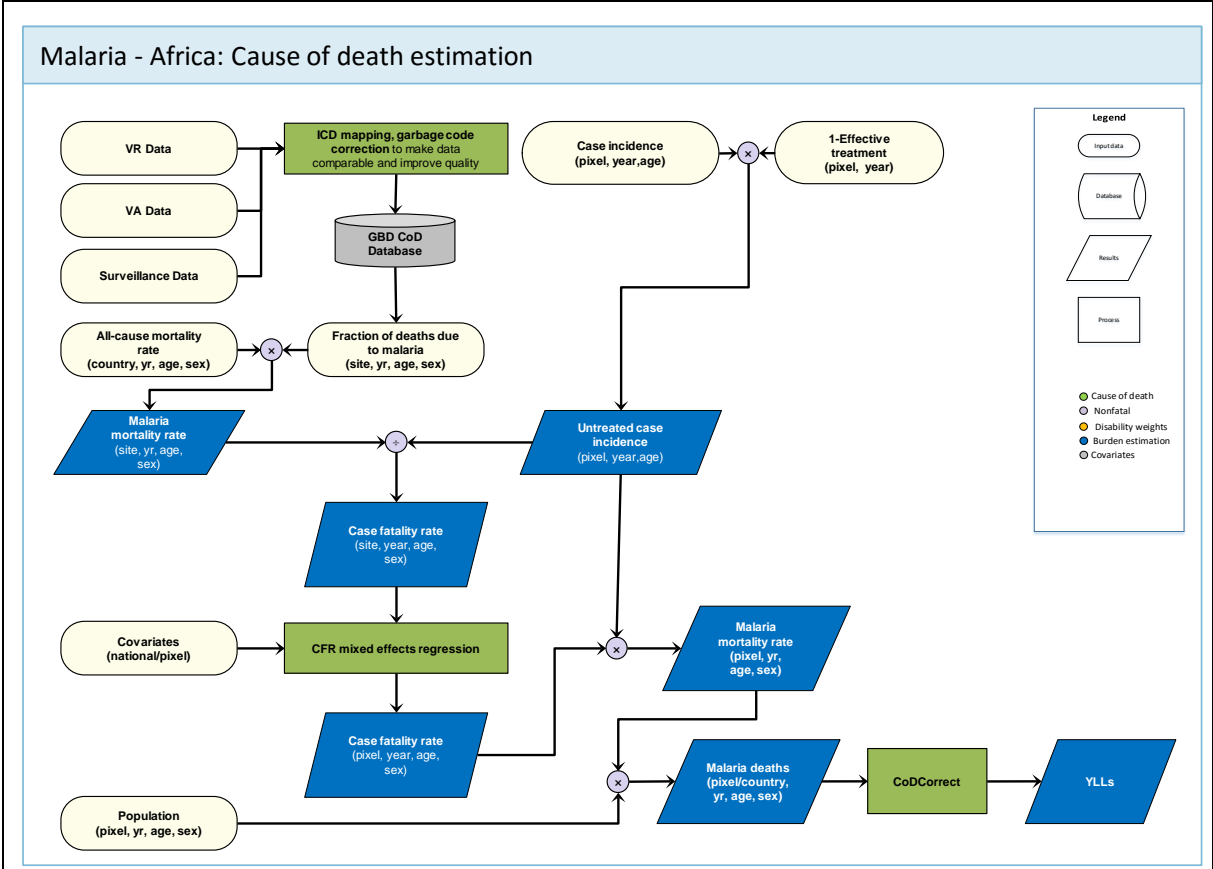

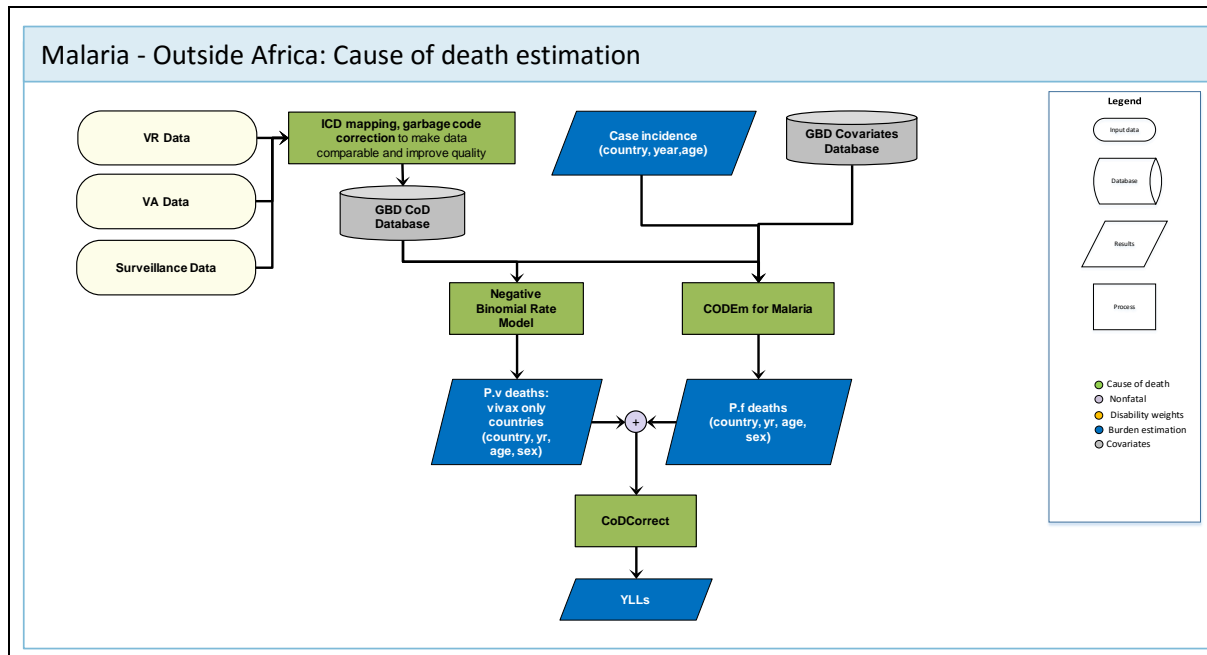

## Input data and methodological summary for malaria

### Overview

Variability in the type and abundance of CoD and related data meant that three distinct approaches were developed to estimate malaria mortality due to (i) *Plasmodium falciparum* inside Africa; (ii) *P. falciparum* outside Africa; and (iii) *P. vivax* in countries without falciparum malaria.

### Input data

For the Outside of Africa and *P. vivax* models, data included vital registration, verbal autopsy, and surveillance data from the cause of death (CoD) database. Unlike other causes of death, we did not redistribute deaths to malaria. For the Africa models, we only used CoD data (mostly verbal autopsy) where we have been able to successfully geo-reference (ie, find latitude and longitude) the site. Systematic literature reviews for malaria were not conducted.

Our outlier criteria excluded data points that (i) were implausibly high or low relative to global or regional patterns, (ii) substantially conflicted with established age or temporal patterns, or (iii) significantly conflicted with other data sources conducted from the same locations or locations with similar characteristics (ie, local Socio-demographic Index).

### Modelling strategy

As described above, the malaria modelling strategy was carried out in three parts.

#### ***P. falciparum*: Africa**

For most GBD causes, epidemiologic measures may be used as covariates in a traditional CODEm approach, if at all. To estimate the fatal burden of *P. falciparum* malaria in Africa, we directly used epidemiologic measures in our estimation process. The Malaria Atlas Project (MAP) at the University of Oxford has generated updated spatiotemporal “cubes” estimating clinical incidence (rates and case counts) for each 5x5 km pixel across Africa, by year, from 1980 to 2015, specified by three broad age-

bins (0–5, 5–14 and 15+). MAP has also generated an equivalent spatiotemporal prediction of access to effective antimalarial drugs (combining access to care, the fraction of malaria cases receiving different classes of antimalarial, and the estimated country-year-specific efficacy of each antimalarial class though time). This estimated treatment rate was combined with the incidence rate cube to derive a third cube estimating the incidence of untreated cases.

For each site-year for which CoD malaria cause fraction data were available we (i) estimated a site-year-specific malaria mortality rate as the product of malaria cause fraction and all-cause mortality rate (with the latter drawn from national-level values); (ii) divided the malaria mortality rate by the site-year-specific estimate of untreated malaria incidence rate (drawn from the MAP cube) to estimate a site-year-specific case fatality rate (CFR) among untreated malaria cases. These derived site-year specific CFR values were then used in a mixed-effects regression model to estimate pixel-year CFR for each 5x5 km grid cell. The models used as covariates are the log of country-year all-cause mortality, pixel-year night-time lights, accessibility, and fractional land-cover classes, and study specific age and sex, with the location of each study site as a national-level random effect. Data were weighted by sample size (ie, the number of all-cause deaths observed in each study site-year).

Pixel-year predictions of CFR were then multiplied by the corresponding untreated incidence rate from the MAP cube to yield a pixel-year mortality rate estimate, which was then multiplied by pixel-year population to compute pixel-year malaria death counts. These were then aggregated to yield the required GBD national or subnational death estimates.

To disaggregate into GBD age-bins, we separately ran a traditional national-level CODEm model with covariates: prevalence of *P. falciparum* in 2–10 age group ( $PfPR_{2-10}$ ), *Pf* incidence rate, years of education, access to effective antimalarial drugs, and health system access. The resulting predicted age-patterns were used to split the country-year mortality estimates.

### ***P. falciparum*: Outside of Africa**

In locations outside of Africa, we continued to use a traditional CODEm approach, mirroring closely that used in GBD 2015. It must be noted that “outside of Africa” also included some countries on the continent of Africa with either very low incidence or relatively robust routine surveillance systems including Algeria, Egypt, Morocco, Comoros, Mauritius, Cape Verde, Sao Tome, Principe, Rwanda, Botswana, Namibia, Eritrea, Djibouti, and South Africa. The model included the following covariates: *Pf* incidence rate, access to effective antimalarial drugs.

### ***P. vivax*: countries without *P. falciparum* transmission**

For countries where the main/exclusive strain of malaria was *P. vivax*, deaths were estimated using a zero-inflated negative binomial mixed model where the outcome is study deaths. The model included as fixed effect the logarithm of mortality rate, age, and sex. Locations were included as random effects.

The results from the *P. vivax*, Outside of Africa, and Africa models were collated and uploaded in CODEm and marked as best model in order to incorporate the estimation in the CodCorrect algorithm.

## References

- 1 Bhatt S, Weiss DJ, Cameron E, *et al.* The effect of malaria control on *Plasmodium falciparum* in Africa between 2000 and 2015. *Nature* 2015; **526**: 207–11.

## Chagas disease

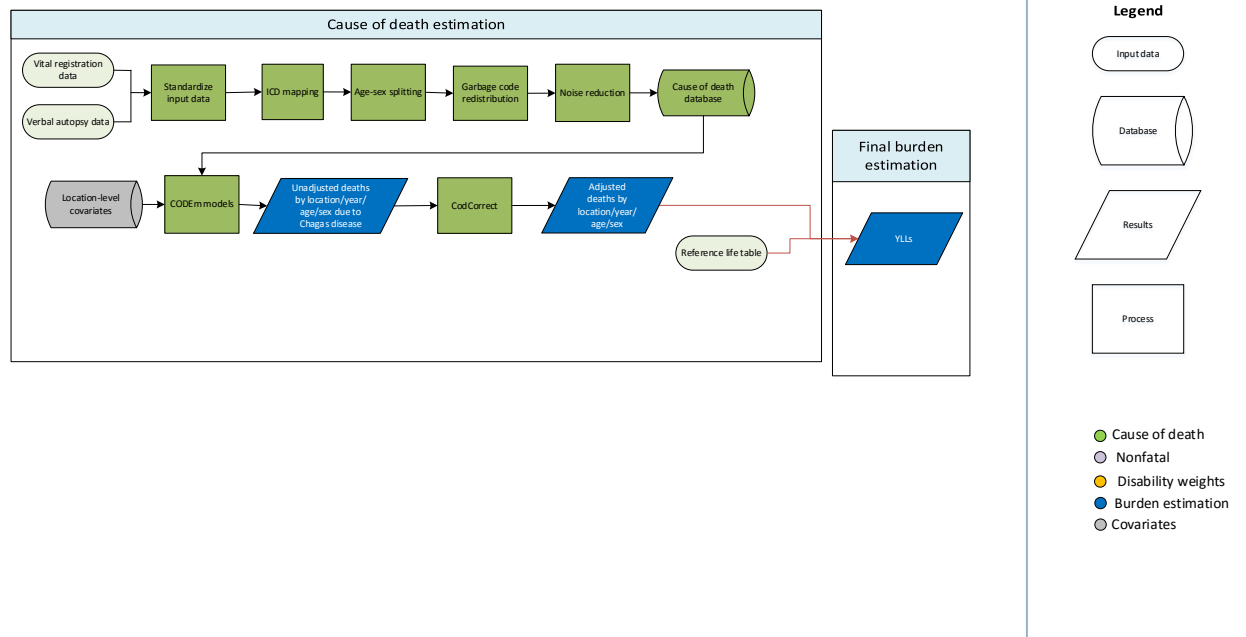

### Input data

We modeled Chagas mortality using all available data in the cause of death database. No data were outliered for this cause.

### Modelling strategy

We modelled Chagas mortality using a two-model hybrid approach: 1) a CODEm model of all Chagas-endemic countries of Latin America using all data in the CoD database; and 2) estimates of mortality from imported cases in non-endemic, data-rich countries. Where Chagas deaths were reported in non-endemic data-rich countries, we produced non-zero estimates by drawing from a beta distribution defined based on number of reported deaths and the underlying sample size. Estimates of Chagas mortality in endemic countries were drawn from the CODEm model.

We have made no substantive changes in the modelling strategy from GBD 2015 to GBD 2016 for Chagas endemic countries.



# Visceral leishmaniasis

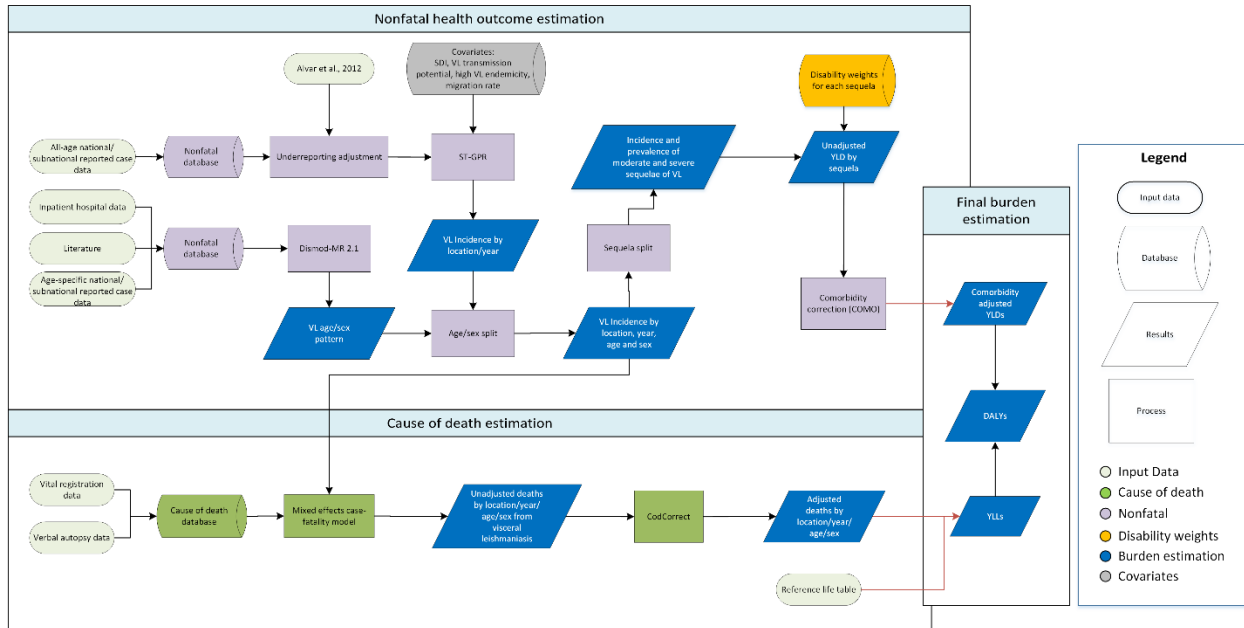

## Input data

Model inputs included incidence estimates derived primarily from reported case data, and cause-specific mortality data from the cause of death (CoD) database, including vital registration and verbal autopsy data.

## Modelling strategy

We estimate VL mortality using a mortality-to-incidence (MI) ratio model. For every VL data point in the cause of death database, we calculate the implied MI ratio as the number of reported VL deaths divided by our corresponding estimate of the number of VL cases. We then model logit-transformed MI ratios using a mixed-effects regression model with fixed effects on age group and sex; and random intercepts on super-region, random slope on sex by super-region, random intercepts on country (nested within super-region), and random slope on age group by country. Finally, we estimate deaths for every location, year, age and sex as the product of our estimates of VL incidence and the modelled MI ratios.

We have substantially revised this model for GBD 2016. Models for both GBD 2015 and GBD 2016 estimate mortality via a MI ratio approach; however, they differ both in the methods used to estimate VL incidence, and in the methods used to estimate MI ratios. Whereas GBD 2015 incidence estimates were derived from a DisMod model, we now estimate incidence via space-time Gaussian process regression (ST-GPR). This approach has the advantage of being able to estimate trends with more detail and accuracy, and of being able to more effectively utilize all-age data, which represent the majority of location-years of incidence data for VL. Moreover, previous iterations of GBD estimated MI ratios from location-years with matching VL hospital and mortality data. Our new approach to estimate MI ratios – based on using estimated incidence rather than hospital-based incidence – offers two advantages: first,

because matched hospital and CoD data are available for only a small number of VL endemic countries, the new approach allows us to leverage information for a much larger set of CoD data; and, second, because we model the relationship using total estimated incidence, rather than hospital-based incidence, our new approach requires no assumptions be made regarding the relationship between total incidence and hospital-based incidence.

# Human African Trypanosomiasis (HAT)

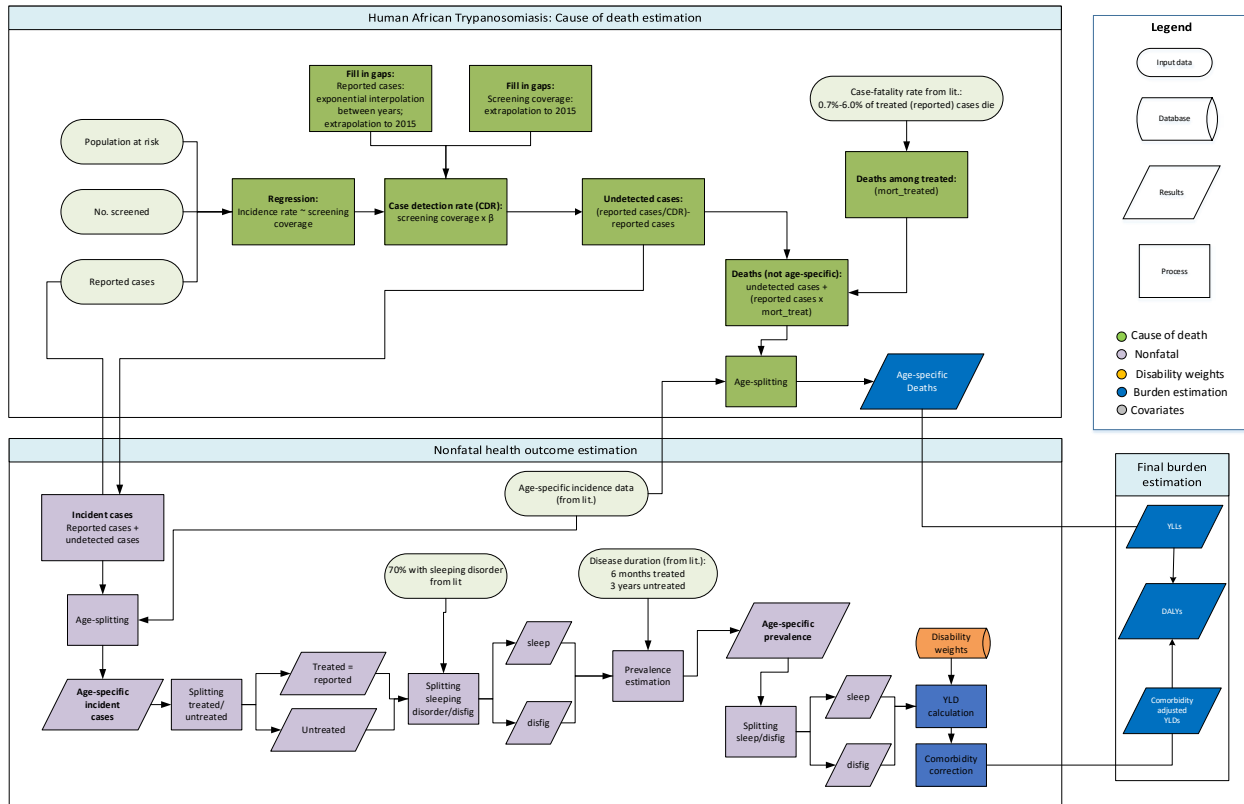

## Input data

A literature search was done for GBD 2013 and for GBD 2015. The GBD 2015 search was conducted between 1/1/2013 and 8/10/2015, and the number of initial hits was 87. Of these, five sources were extracted for data. The literature search was updated by reviewing all publications from 2016; of the 138 sources reviewed, one additional source was identified to describe the age/sex distribution of HAT infection.

Additional input data used to estimate mortality due to HAT included a) population at risk estimates from GBD 2010 ArcGIS analysis using geocoded case notifications for 2000 to 2009<sup>1</sup> and population Count Grid estimates from Gridded Population of the World 3,<sup>2,3</sup> b) population screened from 1997 to 2004,<sup>4</sup> c) historical data from GBD 2010 on total number of HAT cases reported<sup>1,4,5</sup> and d) cases reported annually to the WHO<sup>6</sup> – for Kenya, a study on cases reported subnationally<sup>7</sup> was used to split the national cases into five counties (HomaBay, Migori, Busia, Bungoma, Kakamega). In addition, age-specific incidence data from active screening undertaken in the Democratic Republic of Congo<sup>8</sup> and Uganda<sup>9</sup> were used to inform age pattern for deaths.

Data on the number of cases identified through active screening were obtained from a Weekly Epidemiological Record report<sup>4</sup> for *T.b. gambiense* HAT reported from 1997-2004 which reported active case finding data for the following countries: The Gambia, Ghana, Guinea Bissau, Liberia, Niger, Sierra Leone, and Senegal. No active case detection screening coverage data are currently available for *T.b. rhodesiense* HAT-endemic countries.

National case data from 1990-2015 were obtained from the World Health Organization's official surveillance data (available via the Global Health Observatory).

Based on available historical data post-1980, the following countries (years) were included in the estimation: Botswana (1983), Ethiopia (1980-1983), Guinea-Bissau (1980-1983, 1985-1987), Rwanda (1980, 1982-1988), and Sierra Leone (1981-1982). Five subnational locations (out of 49) for Kenya were also added in the estimation for GBD 2016.

### Modeling strategy

The cause of death model for HAT is implemented as follows:

1. The incidence of reported HAT cases among the population at risk was calculated as the total number of reported cases divided by the population at risk.
2. To estimate the number of cases that were likely undetected by country and year, a multi-level mixed-effects linear regression of natural log-transformed incidence rate (ratio of reported HAT cases to population at risk) on natural log-transformed screening coverage (ratio of number screened for HAT to population at risk), with country random effects, was performed. Gaps were then filled using exponential interpolation between years and extrapolation from 2015 to 2016 for reported cases. This model generates a beta-coefficient which is used to estimate the case detection rate (see step 4).

For country-years in which no screening coverage data were reported:

- Among countries with data reported, 1997-2004, the proportion of the at risk population screened from 1997 was used retrospectively for the period 1990-1996 and the screening coverage from 2004 was carried forward from 2005-2016.
  - For countries with no screening data reported, the mean screening coverage for the region was used to impute a value over time.
3. To construct an estimate of total deaths, we first assume that all detected cases receive treatment, and that mortality among the treated occurs for a small proportion of cases. Deaths among detected cases is estimated by generating one thousand draws of mortality among treated cases, assuming that between 0.7% - 6.0% of all treated (reported) cases die.<sup>10-12</sup>
  4. We then assume that all undetected cases experience mortality. This is estimated via generation of 1,000 draws of the case detection rate (CDR), given the expected screening coverage from the regression (in Step 2). Undetected deaths were then estimated as the difference between the ratio of reported cases to CDR and reported cases (reported cases/CDR – reported cases).
  5. Estimates of death were obtained by adding the reported cases (scaled by mortality among treated) to the undetected cases. Without information on sex-specific incidence or deaths, equal death rates between both sexes was assumed.
  6. Finally, an age-pattern was applied to the mortality estimates using the incidence studies from DRC and Uganda.<sup>8,9,13</sup> The age-pattern in GBD 2016 employed a cubic spline to account for the higher risk of infection among working age adults (as opposed to GBD 2015 in which a step-function at age 20 years was employed to differentiate risk).

## References:

- 1 Simarro PP, Cecchi G, Paone M, *et al.* The Atlas of human African trypanosomiasis: a contribution to global mapping of neglected tropical diseases. *Int J Health Geogr* 2010; **9**: 57.
- 2 Gridded Population of the World (GPW), Version 3: Population Count Grid. Palisades, NY: Socioeconomic Data and Applications Center (SEDAC); Center for International Earth Science Information Network (CIESIN) at Columbia University; Centro Internacional de Agricultura Tropical (CIAT), 2005.
- 3 Gridded Population of the World (GPW), Version 3: Population Count Grid, Future Estimates. Palisades, NY: Socioeconomic Data and Applications Center (SEDAC); Center for International Earth Science Information Network (CIESIN) at Columbia University; United Nations Food and Agriculture Programme (FAO); Centro Internacional de Agricultura Tropical (CIAT), 2005.
- 4 Weekly Epidemiological Record (WER). World Health Organization, 2006.
- 5 World Health Organization, Department of Communicable Disease Surveillance and Response (CDS). WHO Report on Global Surveillance of Epidemic-prone Infectious Diseases. World Health Organization, 2000.
- 6 World Health Organization. Human African Trypanosomiasis. Global Health Observatory data repository. <http://apps.who.int/gho/data/node.main.A1635?lang=en> (accessed April 21, 2016).
- 7 Rutto JJ, Karuga JW. Temporal and spatial epidemiology of sleeping sickness and use of geographical information system (GIS) in Kenya. *J Vector Borne Dis* 2009; **46**: 18–25.
- 8 Lutumba P, Makieya E, Shaw A, Meheus F, Boelaert M. Human African trypanosomiasis in a rural community, Democratic Republic of Congo. *Emerging Infect Dis* 2007; **13**: 248–54.
- 9 Fèvre EM, Odiit M, Coleman PG, Woolhouse MEJ, Welburn SC. Estimating the burden of rhodesiense sleeping sickness during an outbreak in Serere, eastern Uganda. *BMC Public Health* 2008; **8**: 96.
- 10 Balasegaram M, Harris S, Checchi F, Ghorashian S, Hamel C, Karunakara U. Melarsoprol versus eflornithine for treating late-stage Gambian trypanosomiasis in the Republic of the Congo. *Bull World Health Organ* 2006; **84**: 783–91.
- 11 Odiit M, Kansime F, Enyaru JC. Duration of symptoms and case fatality of sleeping sickness caused by *Trypanosoma brucei rhodesiense* in Tororo, Uganda. *East Afr Med J* 1997; **74**: 792–5.
- 12 Priotto G, Kasparian S, Mutombo W, *et al.* Nifurtimox-eflornithine combination therapy for second-stage African *Trypanosoma brucei gambiense* trypanosomiasis: a multicentre, randomised, phase III, non-inferiority trial. *Lancet* 2009; **374**: 56–64.
- 13 Kato CD, Nanteza A, Mugasa C, Edyelu A, Matovu E, Alibu VP. Clinical profiles, disease outcome and co-morbidities among *T. b. rhodesiense* sleeping sickness patients in Uganda. *PLoS One*. 2015; **10**: e0118370.

## Schistosomiasis

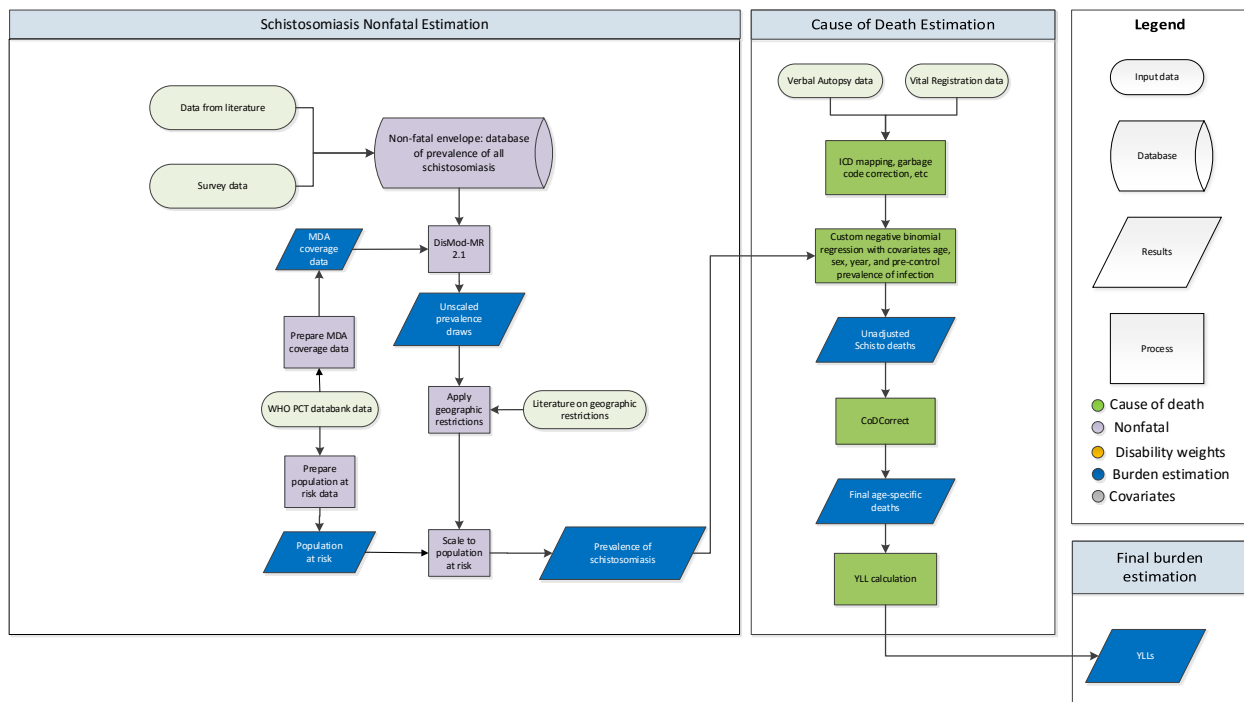

### Input data

To estimate mortality due to schistosomiasis, data on deaths and prevalence of infection were used. The prevalence data were prepared this year for GBD 2016, and further information on prevalence data is available in the nonfatal write-up for this cause. Country-year-age-sex-specific verbal autopsy and vital registration data were used in the mortality model.

### Geographic Restrictions

We conducted a literature review to determine the geographic extent of the disease and classify locations based on whether the disease is absent or present in each year. Locations that were geographically restricted in any given year did not have estimates made for them but could have imported cases attributed to them at a later stage. Of note, we did not attempt a complete systematic review, since a single high-quality source could offer sufficient evidence of presence. Evidence of absence or presence was not available for every location for each year and so assumptions were made for missing years by taking into consideration the epidemiological characteristics of the disease. If evidence indicated disease presence for two non-consecutive years, we assumed presence for all years between the two. If evidence indicated disease absence for two non-consecutive years, we assumed absence for all years between the two. If evidence indicated a change in status (i.e. from absent to present, or present to absent) between two non-consecutive years than we conducted targeted searches to ascertain the relevant year of introduction or elimination for that location. In the cases where presence or absence information was missing for the start or end years of our study interval (1990-2016) without evidence of any introduction or elimination events within the interval, we applied the status of the first and last presence/absence observations respectively to all years between the

interval bound and the observation year. For schistosomiasis, we used a combination of Chitsulo et al's *The global status of schistosomiasis and its control* (1) and WHO's *Preventative chemotherapy in human helminthiasis* (2) report as a baseline. Where country-level endemicity statuses conflicted between the two sources, we searched Pubmed and Google Scholar for country and subnational-specific endemicity status. Our search yielded 22 sources that were used to develop our annual geographic restriction map for schistosomiasis.

### **Modelling strategy**

To estimate deaths due to schistosomiasis, a negative binomial regression model of country-year-age-sex-specific deaths on natural log-transformed prevalence of total schistosomiasis infection with a 5-year lag was used. The negative binomial regression was selected due to its suitability for modelling count data. In addition, there are relatively low number of deaths attributable to schistosomiasis. Covariates for endemic Brazil subnationals and South Africa subnationals were used to allow the model to follow data in those areas. A multivariate normal distribution using the mean and variance-covariance matrix from the model was used to generate 1,000 draws of deaths due to schistosomiasis.

Models were evaluated by assessing the AIC and plotting the predicted deaths against time, age, and sex. In addition, the Cause of Death Visualization tool was used to evaluate time trends across locations, age, and sex. A map of the global distribution of schistosomiasis across age-groups was also used to assess the changes in death rates over time. The final model was selected based on how well the estimated numbers fit the input data and how plausible the predicted distribution of disease was over time and with age.

### **References**

- (1) Chitsulo, L., Engels, D., Montresor, A., & Savioli, L. (2000). The global status of schistosomiasis and its control. *Acta Tropica*, 77(1), 41-51. doi:10.1016/s0001-706x(00)00122-4
- (2) World Health Organization (2006). *Preventive chemotherapy in human helminthiasis : coordinated use of anthelmintic drugs in control interventions : a manual for health professionals and programme managers.*

## Cysticercosis

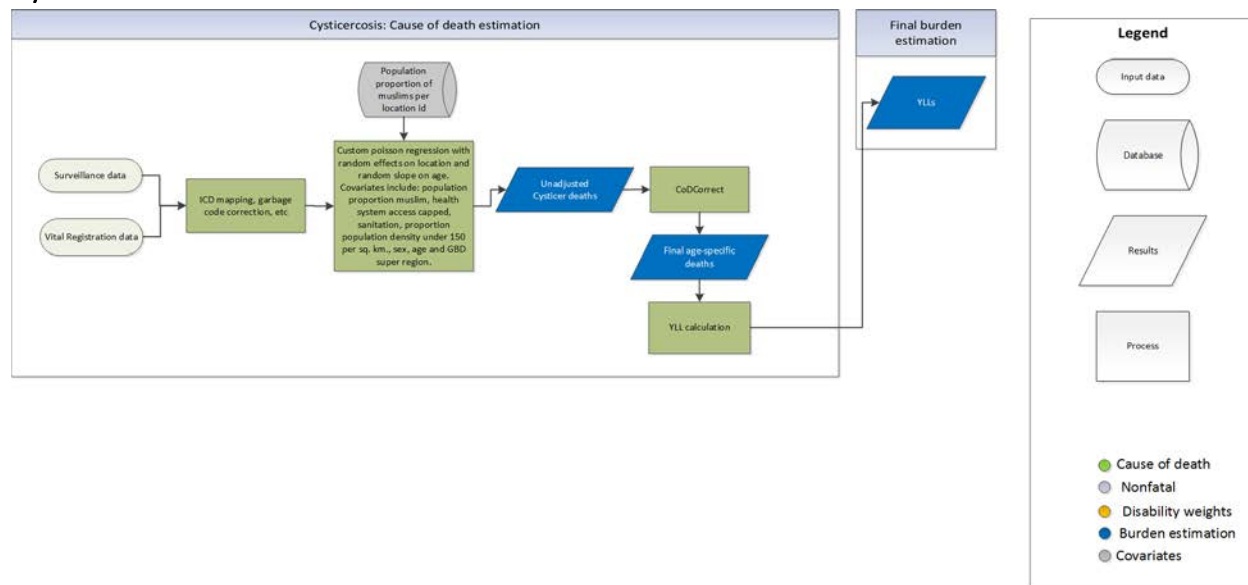

### Input data

The model for mortality due to cysticercosis relied on vital registration and surveillance data from endemic countries. In addition, we used data from the Pew Research Center on percentage of population that is Muslim by country. The primary covariates adjusted for in the model were proportion of the population that is Muslim, health system access capped, proportion of the population with access to sanitation, proportion of the country with population density under 150 people per square kilometer, sex, age and GBD super region.

### Geographic Restrictions

We conducted a literature review to determine the geographic extent of the disease and classify locations based on whether the disease is absent or present in each year. Locations that were geographically restricted in any given year did not have estimates made for them but could have imported cases attributed to them at a later stage. Of note, we did not attempt a complete systematic review, since a single high-quality source could offer sufficient evidence of presence. Evidence of absence or presence was not available for every location for each year and so assumptions were made for missing years by taking into consideration the epidemiological characteristics of the disease. If evidence indicated disease presence for two non-consecutive years, we assumed presence for all years between the two. If evidence indicated disease absence for two non-consecutive years, we assumed absence for all years between the two. If evidence indicated a change in status (i.e. from absent to present, or present to absent) between two non-consecutive years than we conducted targeted searches to ascertain the relevant year of introduction or elimination for that location. In the cases where presence or absence information was missing for the start or end years of our study interval (1990-2016) without evidence of any introduction or elimination events within the interval, we applied the status of the first and last presence/absence observations respectively to all years between the interval bound and the observation year. For cysticercosis, we performed targeted searches to classify



location-years in PubMed and Google Scholar. Our map was populated by 21 peer-reviewed articles and meta-analyses and WHO reports.

### **Modelling strategy**

Globally, deaths due to cysticercosis are relatively low. Therefore, a Poisson model was used to model cysticercosis deaths due to its suitability for count data. This model choice was validated by tests for overdispersion. Random effects were used on location with random slopes on age by location. A multivariate normal distribution using the mean and variance-covariance matrix from the model was used to generate 1,000 draws of deaths due to cysticercosis.

Estimates for new subnational locations were also added in GBD 2016. Since the Pew Research Center only has data on proportion of Muslims by country, we applied the national proportions to subnational locations. We understand that this does not account for sometimes large expected differences in proportions of Muslims within a country, but were limited by data availability.

## Cystic Echinococcosis (CE)

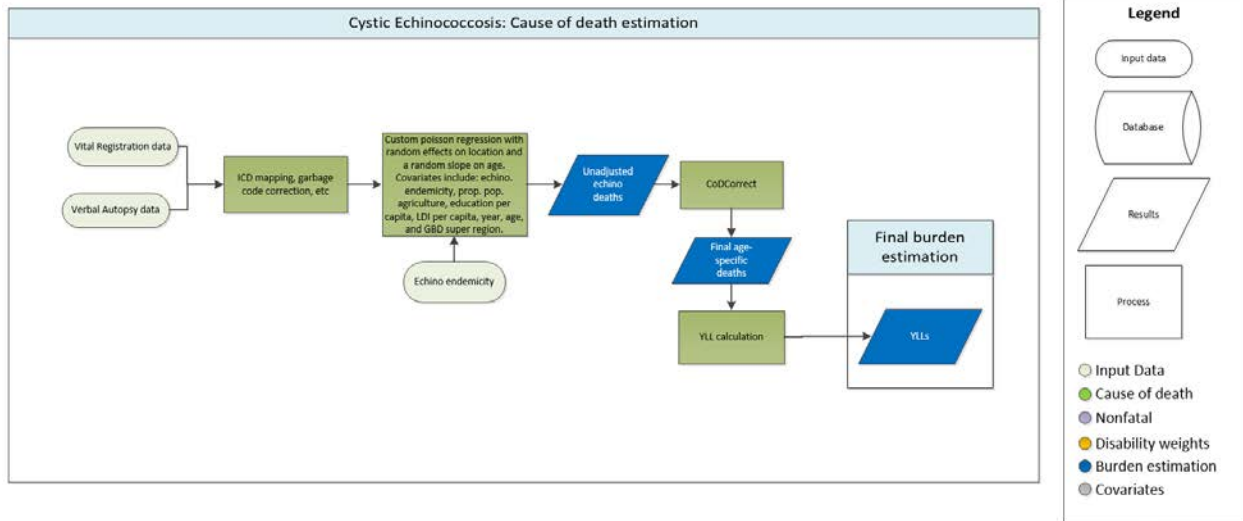

### Input data

There are limited data sources on deaths due to cystic echinococcosis (CE). The model relied on vital registration and hospital surveillance data from endemic countries. We incorporated a categorical measure of echinococcosis endemicity provided by one of our echinococcosis collaborators with four levels: 0=no cases/no data; 1=sporadic/mostly imported; 2=endemic/limited data; and 3=highly endemic. Other covariates included proportion of the population involved in agricultural activities, years of education per capita, lag distributed income per capita, age, year and GBD super region.

### Geographic Restrictions

We conducted a literature review to determine the geographic extent of the disease and classify locations based on whether the disease is absent or present in each year. Locations that were geographically restricted in any given year did not have estimates made for them but could have imported cases attributed to them at a later stage. Of note, we did not attempt a complete systematic review, since a single high-quality source could offer sufficient evidence of presence. Evidence of absence or presence was not available for every location for each year and so assumptions were made for missing years by taking into consideration the epidemiological characteristics of the disease. If evidence indicated disease presence for two non-consecutive years, we assumed presence for all years between the two. If evidence indicated disease absence for two non-consecutive years, we assumed absence for all years between the two. If evidence indicated a change in status (i.e. from absent to present, or present to absent) between two non-consecutive years then we conducted targeted searches to ascertain the relevant year of introduction or elimination for that location. In the cases where presence or absence information was missing for the start or end years of our study interval (1990-2016) without evidence of any introduction or elimination events within the interval, we applied the status of the first and last presence/absence observations respectively to all years between the interval bound and the observation year. For cystic echinococcosis, we performed targeted searches to classify location-years in PubMed and Google Scholar. Our map was populated by 23 peer-reviewed articles and meta-analyses.

### **Modelling strategy**

The cause of death ensemble model (CODEm) was not employed for modelling deaths from CE due to the paucity of data on deaths from CE. We therefore used a Poisson model to model deaths with random effects by location and a random slope on age by location. A multivariate normal distribution using the mean and variance-covariance matrix from the model was used to generate 1,000 draws of deaths due to cystic echinococcosis.

Using a multivariate normal distribution with mean and variance-covariance matrix from the Poisson regression, we generated 1,000 draws of estimates for the countries endemic for CE. The final model was selected based on how well the estimated numbers fit the input data and how plausible the predicted distribution of disease was over time and with age.

# Dengue

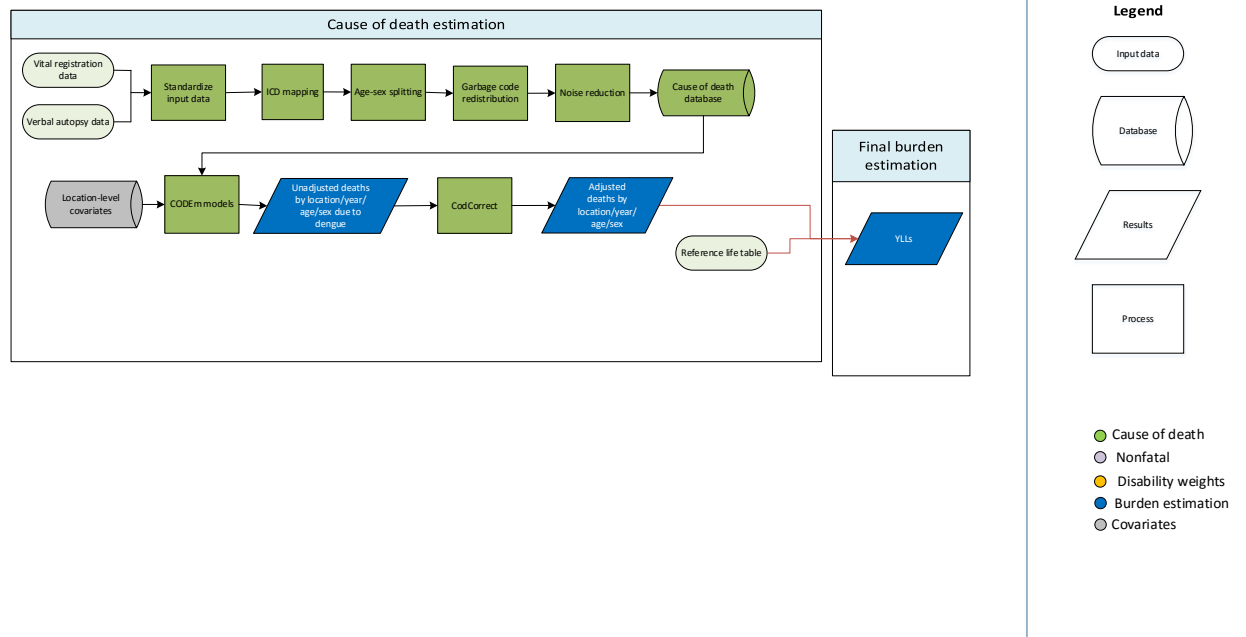

## Input data

We modelled dengue mortality using all available data in the cause of death database. Data points were outliered if they reported an improbably low number of dengue deaths (eg, zero dengue deaths in a hyper-endemic country) or an improbably high number of dengue deaths.

## Modelling strategy

We modelled dengue mortality using three-model hybrid approach: 1) a global CODEm model of all locations, using all data in the CoD database; 2) a CODEm model restricted to data-rich countries; and 3) estimates of mortality from imported cases in non-endemic, data-rich countries. Where dengue deaths were reported in non-endemic data-rich countries, we produced non-zero estimates by drawing from a beta distribution based on number of reported deaths and the underlying sample size. Estimates of dengue mortality in endemic data-rich countries were drawn from the data-rich CODEm model. Finally, estimates in other endemic countries were drawn from the global CODEm model.

While we've made no substantive changes to the modelling strategy in 2016, we have updated the geographic restrictions that determine whether a location is considered non-endemic (and, therefore, will have estimates based on the imported case model) in a given year. As for GBD 2015, we derived our geographic restrictions for 2010 from Brady et al(1). Whereas, in GBD 2015 we treated these as static restrictions, for GBD 2016 we conducted a literature review to determine locations and years in which dengue was introduced or eliminated, to allow for time-varying geographic restrictions. Of note, we did not attempt a complete systematic review, since a single high-quality source could offer sufficient evidence of presence. In total, we used 14 additional sources to supplement Brady et al's review.(2–15)

1. Brady OJ, Gething PW, Bhatt S, Messina JP, Brownstein JS, Hoen AG, et al. Refining the Global Spatial Limits of Dengue Virus Transmission by Evidence-Based Consensus. *PLoS Negl Trop Dis*. 2012 Aug 7;6(8):e1760.
2. Al ST et. Autochthonous Dengue Fever, Tokyo, Japan, 2014 - Volume 21, Number 3— March 2015 - *Emerging Infectious Disease journal - CDC*. [cited 2017 Apr 28]; Available from: [https://wwwnc.cdc.gov/eid/article/21/3/14-1662\\_article](https://wwwnc.cdc.gov/eid/article/21/3/14-1662_article)
3. Guzman MG, Kouri G. Dengue and dengue hemorrhagic fever in the Americas: lessons and challenges. *J Clin Virol*. 2003 May;27(1):1–13.
4. Boshell J, Groot H, Gacharna M, Márquez G, González M, Gaitán MO, et al. Dengue en Colombia. *Biomédica*. 1986;6(3–4):101–6.
5. Effler PV, Pang L, Kitsutani P, Vorndam V, Nakata M, Ayers T, et al. Dengue Fever, Hawaii, 2001–2002. *Emerg Infect Dis*. 2005 May;11(5):742–9.
6. McBride WJH. Dengue fever: is it endemic in Australia? *Intern Med J*. 2010 Apr 1;40(4):247–9.
7. Kay BH, Barker-Hudson P, Stallman ND, Wiemers MA, Marks EN, Holt PJ, et al. Dengue fever. Reappearance in northern Queensland after 26 years. *Med J Aust*. 1984 Mar 3;140(5):264–8.
8. Al GA et. Dengue Reemergence in Argentina - Volume 5, Number 4—August 1999 - *Emerging Infectious Disease journal - CDC*. [cited 2017 Apr 28]; Available from: [https://wwwnc.cdc.gov/eid/article/5/4/99-0424\\_article](https://wwwnc.cdc.gov/eid/article/5/4/99-0424_article)
9. Ramos MM, Mohammed H, Zielinski-Gutierrez E, Hayden MH, Lopez JLR, Fournier M, et al. Epidemic Dengue and Dengue Hemorrhagic Fever at the Texas–Mexico Border: Results of a Household-based Seroepidemiologic Survey, December 2005. *Am J Trop Med Hyg*. 2008 Mar 1;78(3):364–9.
10. Luo L, Liang H, Hu Y, Liu W, Wang Y, Jing Q, et al. Epidemiological, virological, and entomological characteristics of dengue from 1978 to 2009 in Guangzhou, China. *J Vector Ecol*. 2012 Jun 1;37(1):230–40.
11. Murray KO, Rodriguez LF, Herrington E, Kharat V, Vasilakis N, Walker C, et al. Identification of Dengue Fever Cases in Houston, Texas, with Evidence of Autochthonous Transmission Between 2003 and 2005. *Vector Borne Zoonotic Dis*. 2013 Dec 1;13(12):835–45.
12. Locally Acquired Dengue --- Key West, Florida, 2009--2010 [Internet]. [cited 2017 Apr 28]. Available from: <https://www.cdc.gov/mmwr/preview/mmwrhtml/mm5919a1.htm>
13. Bouri N, Sell TK, Franco C, Adalja AA, Henderson DA, Hynes NA. Return of Epidemic Dengue in the United States: Implications for the Public Health Practitioner. *Public Health Rep*. 2012;127(3):259–66.

14. Wilder-Smith A, Quam M, Sessions O, Rocklov J, Liu-Helmersson J, Franco L, et al. The 2012 dengue outbreak in Madeira: exploring the origins. 2014 [cited 2017 Apr 28]; Available from: <https://dr.ntu.edu.sg/handle/10220/19685>
15. Brathwaite Dick O, San Martín JL, Montoya RH, del Diego J, Zambrano B, Dayan GH. The History of Dengue Outbreaks in the Americas. *Am J Trop Med Hyg.* 2012 Oct 3;87(4):584–93.

# Yellow fever

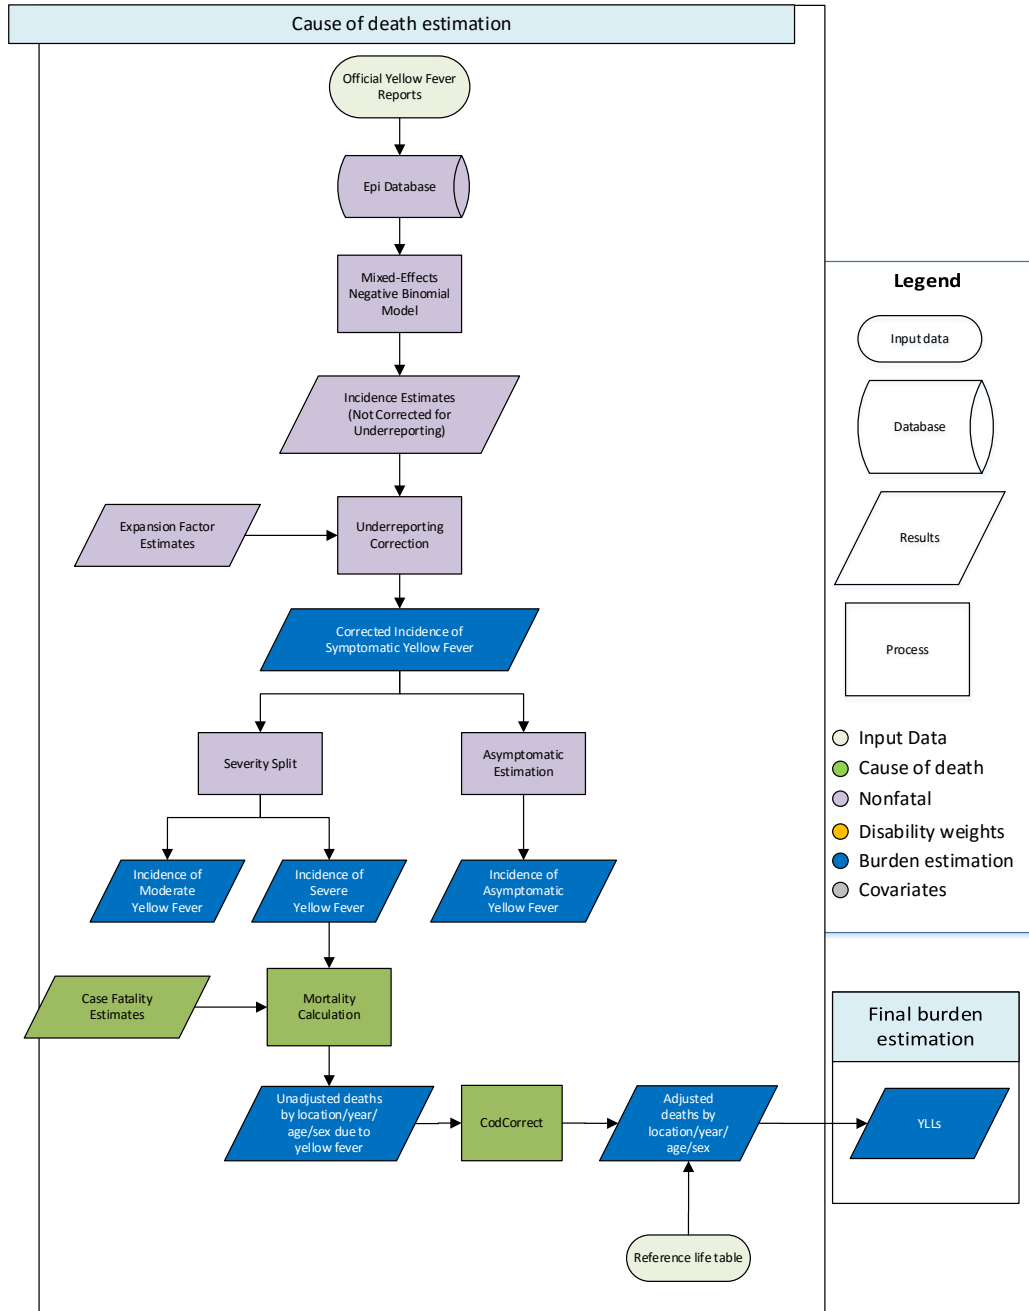

## Input data

Case data come from official case reports filed with the World Health Organization. Data on case fatality come from published studies of yellow fever fatality. Data on deaths in non-endemic countries are restricted to only vital registration data.

## Modelling strategy

We model yellow fever deaths using a hybrid approach. For countries in which yellow fever is endemic, we use a natural history approach in which we estimate deaths as the product of cases and case fatality. For non-endemic countries, we allow for deaths among imported cases where we have vital registration data indicating yellow fever deaths. That is, we assume no yellow fever deaths in non-endemic countries; however, where yellow fever deaths are reported in vital registration data, we accept those as true imported yellow fever deaths.

We model reported cases using a mixed-effects negative binomial model, with fixed effects for year and random effects for super-region, region, and country. We assume that yellow fever cases are underreported and that this underreporting mirrors that of dengue (a disease for which we have better data on underreporting). With that, we estimate symptomatic cases as the product of our base case estimates and dengue expansion factors (ie, the factor by which you must multiply reported cases to derive true cases). Based on published estimates, we assume that 27% of symptomatic cases will be severe.<sup>1</sup>

We performed a meta-analysis of case fatality using data from published studies of yellow fever fatality. Studies tend to report deaths among those with severe infection (eg, hospitalized cases), rather than among all cases. We assume that no deaths occur with asymptomatic infection or among those with only moderate symptoms. With that, we estimate deaths as the product of severe cases and case fatality.

We have improved our method for correcting for underreporting of yellow fever. In estimating yellow fever deaths for GBD 2013, our model assumed that all severe cases were reported and that reported cases reflected only severe cases. With that, we adjusted our base estimates upward to account for non-severe cases, and based our mortality estimates off these adjusted numbers. Based on feedback from collaborators, we believe that this adjustment was inadequate to fully account for underreporting. Accordingly, we have adopted the expansion factor-based method described above for GBD 2015.

Moreover, we have adopted the hybrid approach for GBD 2015. Whereas we previously allowed no yellow fever deaths in non-endemic countries, we now accept deaths reported in vital registration data as true imported deaths.

We have made no substantive changes to the modelling strategy for GBD 2016.

## Reference

1 Johansson MA, Vasconcelos PFC, Staples JE. The whole iceberg: estimating the incidence of yellow fever virus infection from the number of severe cases. *Trans R Soc Trop Med Hyg* 2014; 108: 482–7.



## Rabies

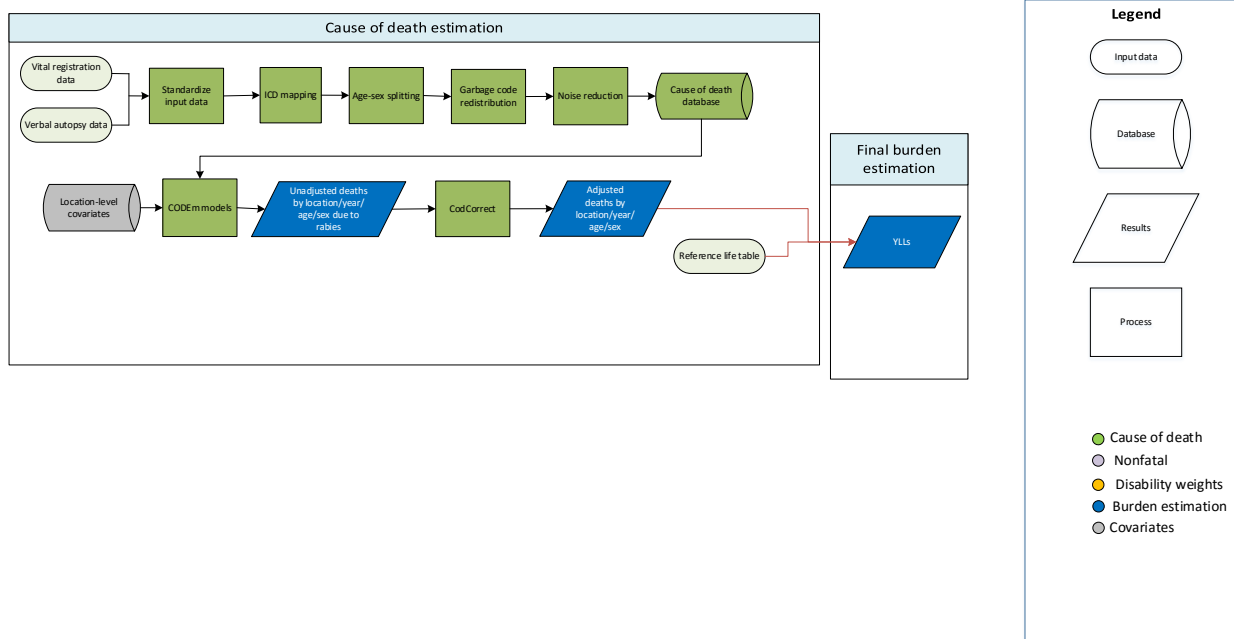

### Input data

We modeled rabies mortality using all available data in the cause of death database. Data points were outliered if they reported an improbable number of rabies deaths (e.g., zero rabies deaths in a hyper-endemic country) or if their inclusion in the model yielded distorted trends. In some cases multiple data sources for the same location differed dramatically both in their quality and reported rabies mortality (e.g., a verbal autopsy and vital registration source). In these cases the lower-quality data source was outliered.

### Modeling strategy

We modeled rabies mortality using a two-model hybrid approach: 1) a global CODEm model of all locations, using all data in the CoD database; and 2) a CODEm model restricted to data-rich countries.

We have made no substantive changes to the modeling strategy in 2016.

## Ascariasis

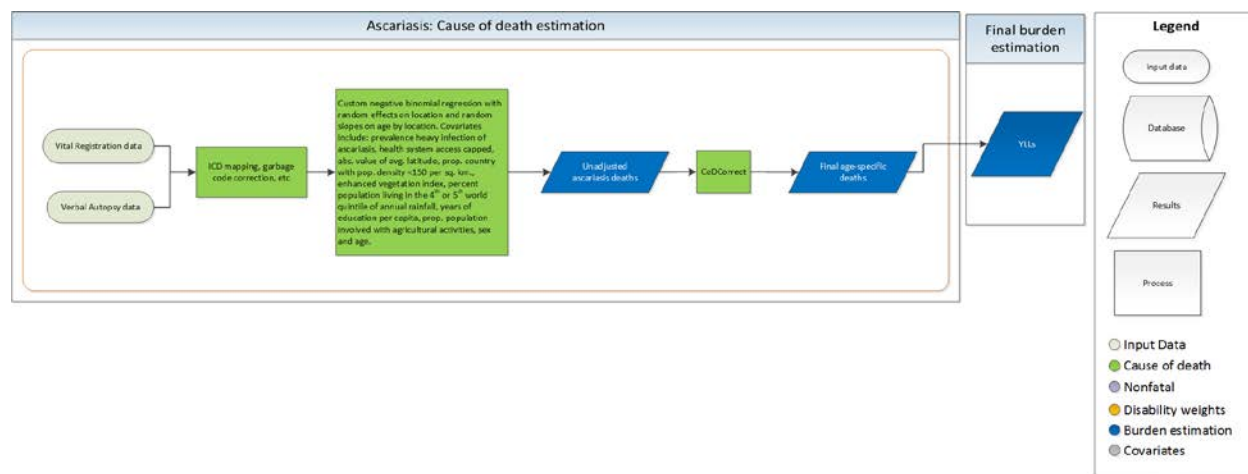

### Input data

To estimate mortality due to ascariasis, country-year-age-sex-specific verbal autopsy and vital registration data were used. Covariates used include prevalence of heavy infection of ascariasis, health system access capped by the minimum OECD value, the absolute value of average latitude, the proportion of the country with population density under 150 people per square kilometer, enhanced vegetation index, percent of the population living in the 4<sup>th</sup> or 5<sup>th</sup> world quintile of annual rainfall, number of years of education per capita, proportion of the population involved with agricultural activities, sex and age.

### Geographic Restrictions

We conducted a literature review to determine the geographic extent of the disease and classify locations based on whether the disease is absent or present in each year. Locations that were geographically restricted in any given year did not have estimates made for them but could have imported cases attributed to them at a later stage. Of note, we did not attempt a complete systematic review, since a single high-quality source could offer sufficient evidence of presence. Evidence of absence or presence was not available for every location for each year and so assumptions were made for missing years by taking into consideration the epidemiological characteristics of the disease. If evidence indicated disease presence for two non-consecutive years, we assumed presence for all years between the two. If evidence indicated disease absence for two non-consecutive years, we assumed absence for all years between the two. If evidence indicated a change in status (i.e. from absent to present, or present to absent) between two non-consecutive years than we conducted targeted searches to ascertain the relevant year of introduction or elimination for that location. In the cases where presence or absence information was missing for the start or end years of our study interval (1990-2016) without evidence of any introduction or elimination events within the interval, we applied the status of the first and last presence/absence observations respectively to all years between the interval bound and the observation year. Our search was done in conjunction with the title/abstract screening portion of a systematic literature review for prevalence data. The search strings and yield can be viewed in the table below for each of the databases queried.

| Database | Search String | Yield |
|----------|---------------|-------|
|----------|---------------|-------|

|                |                                                                                                                                                                                                                                                                                                                                                                                                                                                                                                                                                                                                                                                                                                                               |      |
|----------------|-------------------------------------------------------------------------------------------------------------------------------------------------------------------------------------------------------------------------------------------------------------------------------------------------------------------------------------------------------------------------------------------------------------------------------------------------------------------------------------------------------------------------------------------------------------------------------------------------------------------------------------------------------------------------------------------------------------------------------|------|
| PubMed         | (Ascariasis[Title/Abstract] OR Ascaris[Title/Abstract] OR "A. lumbricoides"[Title/Abstract] OR Ascaris[MeSH] OR Trichuris[Title/Abstract] OR Trichuriasis[Title/Abstract] OR "Whip Worm"[Title/Abstract] OR "T. trichura"[Title/Abstract] OR Trichuris[MeSH] OR Hookworm[Title/Abstract] OR "A. duodenale"[Title/Abstract] OR "Ancylostoma duodenale"[Title/Abstract] OR ancylostomiasis[Title/Abstract] OR "N. americanus"[Title/Abstract] OR "Necator americanus"[Title/Abstract] OR necatoriasis[Title/Abstract] OR Ancylostoma [MeSH] OR Necator[MeSH]) AND (prevalence[Title/Abstract] OR incidence[Title/Abstract] OR epidemiology[Title/Abstract] OR surveillance[Title/Abstract]) NOT(Animals[MeSH] NOT Humans[MeSH]) | 2376 |
| Web of Science | (Ascariasis OR Ascaris OR A. lumbricoides OR Trichuris OR Trichuriasis OR Whip Worm OR T. trichura OR Hookworm OR A. duodenale OR Ancylostoma duodenale OR ancylostomiasis OR N. americanus OR Necator americanus OR necatoriasis) AND TOPIC:(prevalence OR incidence OR epidemiology OR surveillance) NOTTOPIC: ((Animals NOT Humans))<br>Timespan: 1980-2016. Indexes: SCI-EXPANDED, SSCI, A&HCI, ESCI.                                                                                                                                                                                                                                                                                                                     | 2266 |
| SCOPUS         | TITLE-ABS_KEY (ascariasis OR ascaris OR a. lumbricoides OR trichuris OR trichuriasis OR whip worm OR t. trichura OR hookworm OR a. duodenale OR ancylostoma duodenale OR ancylostomiasis OR n. americanus OR necator americanus OR necatoriasis) AND PUBYEAR>1979                                                                                                                                                                                                                                                                                                                                                                                                                                                             | 29   |

These papers were used to classify location-years for all locations and years present in the literature. Additionally, systematic literature reviews, meta-analyses, national health statistics publications and collaborator input were used to classify location-years not present in the literature review wherever possible.

### Modelling strategy

A Negative Binomial model was used to estimated deaths from ascariasis with random intercepts for locations and random slopes for age groups by location. A multivariate normal distribution using the mean and variance-covariance matrix from the model was used to generate 1,000 draws of deaths due to ascariasis. The final model was selected based on how well the estimated number fit the input data and how plausible the predicted distribution of disease was over time and with age.

# Ebola

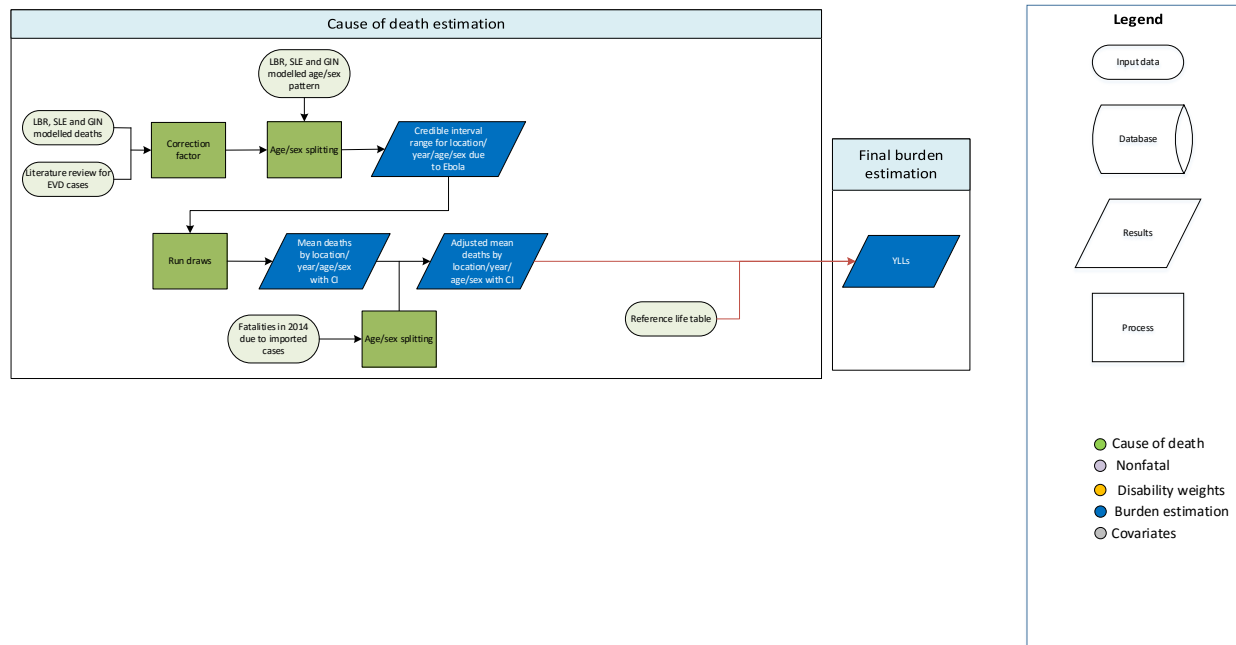

## Input data

The input data for deaths due to Ebola virus disease (EVD) came in two forms: (i) modelled estimates for the West African outbreak from 2013 to 2016 provided by the World Health Organization (WHO) focused specifically on the three worst-affected countries (Liberia, Guinea, and Sierra Leone) and (ii) literature searches for reported deaths due to EVD not captured by the West African dataset. This is further explained below:

- i. WHO estimates for Liberia, Guinea, and Sierra Leone, 2014–2016
  1. Researchers from Imperial College London (UK), as part of the WHO Ebola response team, provided modelled estimates for the number of fatalities that result from a given number of reported cases (provided by line lists from the WHO). This method was used in a variety of papers to generate baseline estimates of case fatality rates and other key epidemiological measures while correcting for the lag period between initially reporting a case and the final outcome of that case (whether it be death or survival). The full data cleaning and methodology are reported elsewhere.<sup>1,2</sup> Bespoke estimates were provided for GBD for Liberia, Sierra Leone, and Guinea and were stratified by age, sex, and year. Death data from Guinea ranged from February 18, 2014, until September 27, 2015, with data from Liberia ranging from March 20, 2014, to May 4, 2015, and data from Sierra Leone ranging from May 21 until September 28, 2015.

2. Reported clusters of cases in 2016 were identified by consulting WHO situation reports from the year 2016.
- ii. Literature searches for reported deaths due to EVD outside of Liberia, Guinea, and Sierra Leone
  1. In order to capture the small number of fatalities that occurred in countries outside of the core three mentioned above, WHO Situation Reports were consulted. Fatalities were reported in the US (specifically Texas), Mali, and Nigeria.<sup>3</sup> All deaths occurred in 2014. Additional age and sex information could only be obtained for the death that occurred in the US.

Using a previous review of historical outbreaks,<sup>4,5</sup> original articles describing the progression of historical outbreaks were consulted. This initial review was also updated to include the 2014 outbreak that occurred in the Democratic Republic of the Congo in 2014.<sup>6</sup> This resulted in datasets describing each outbreak with variable degrees of detail – some fully describing the age and sex breakdown of all deaths [eg, Rosello and colleagues<sup>7</sup>] and others simply providing the final total. Only confirmed or probable deaths were included; suspected EVD deaths were omitted. Outbreaks that spanned multiple years, in the absence of sufficient data providing an accurate breakdown, were apportioned between the years by evenly assigning a uniform number of deaths to each month of the outbreak’s duration.

### Modelling strategy

Data on deaths resulting from imported cases from 2014 were used as specific count data as it was assumed to be an accurate representation of the cases and outbreaks in these countries, all of which were on high alert for importation of cases.<sup>8,9</sup>

The other input data were processed prior to inclusion in GBD to account for any potential underreporting of deaths. A meta-analysis of existing underreporting studies from the literature was performed, using a random effects model with a DerSimonian-Laird estimator. A variety of sources were included, capturing a number of different estimation processes, all identified by literature review. The figure below shows the different effect sizes of the different studies,<sup>10–15</sup> as well as the resulting GBD 2016 correction factor, with the GBD 2015 correction factor for reference. The correction factor ranged from 1.4580 to 2.5475, with a mean of 2.0027.

### Underreporting of Ebola death data

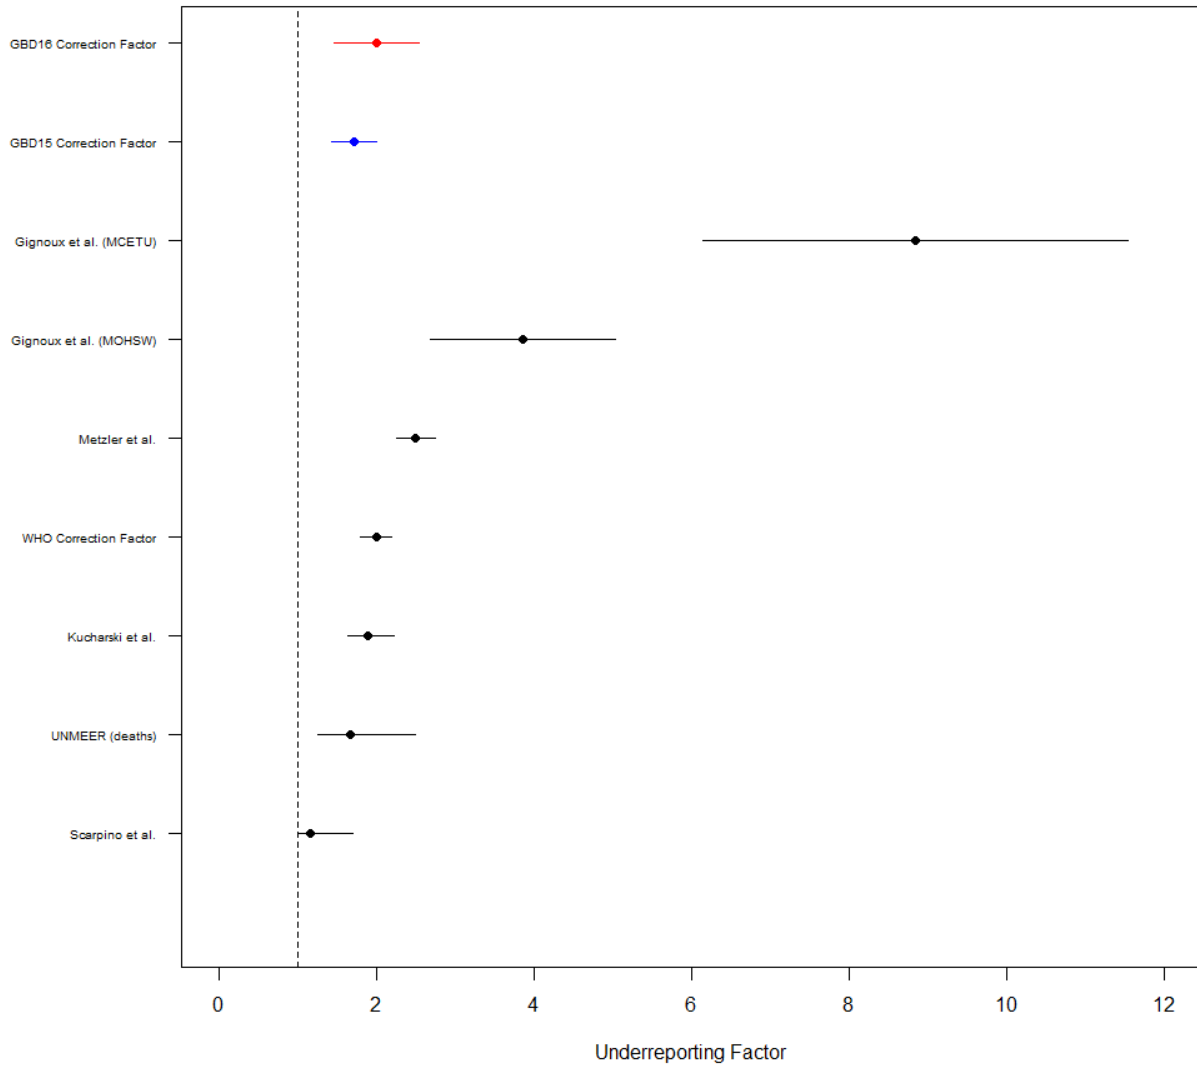

In order to capture this potential variation, all input data were multiplied by the lower and upper limit of this estimated correction factor; these numbers then provided the lower and upper bounds from which draw values were taken. For outbreaks where no data were supplied for age and/or sex, the pattern observed in the West African outbreak (for which there were the most comprehensive data) was used to apportion these total values.

One thousand draws were taken from a normal distribution fitted between these lower and upper bound values, which generated mean estimates stratified by age, sex, location, and year along with credible intervals for these numbers. These estimates were then adjusted by including the count data for imported cases from 2014.

Data on Ebola outbreaks prior to 2014 are sparse, and as a result many values derived from the West African outbreak were assumed to be valid for historical outbreaks as well. This may mask significant differences that exist between these outbreaks, some of which were caused by different species of

*Ebolavirus*. In order to minimize this problem we chose to implement a data-driven approach – for those outbreaks where sufficiently detailed historical data could be obtained, these were used in preference to any assumed age/sex breakdown.

## References

- 1 Agua-Agum J, Ariyaratna A, Aylward B, *et al.* West African Ebola Epidemic after One Year — Slowing but Not Yet under Control. *N Engl J Med* 2015; **372**: 584–7.
- 2 Ebola Virus Disease in West Africa - The First 9 Months of the Epidemic and Forward Projections. *N Engl J Med* 2014; **371**: 1481–95.
- 3 World Health Organization. Ebola Situation Reports. 2016. Interview (accessed March 14, 2016).
- 4 Pigott DM, Golding N, Mylne A, *et al.* Mapping the zoonotic niche of Ebola virus disease in Africa. *Elife* 2014; **3**: e04395.
- 5 Mylne A, Brady OJ, Huang Z, *et al.* A comprehensive database of the geographic spread of past human Ebola outbreaks. *Sci Data* 2014; **1**: 140042.
- 6 Maganga GD, Kapetshi J, Berthet N, *et al.* Ebola virus disease in the Democratic Republic of Congo. *N Engl J Med* 2014; **371**: 2083–91.
- 7 Rosello A, Mossoko M, Flasche S, *et al.* Ebola virus disease in the Democratic Republic of the Congo, 1976-2014. *Elife* 2015; **4**. DOI:10.7554/eLife.09015.
- 8 Fasina FO, Shittu A, Lazarus D, *et al.* Transmission dynamics and control of Ebola virus disease outbreak in Nigeria, July to September 2014. *Euro Surveill* 2014; **19**: 20920.
- 9 Althaus CL, Low N, Musa EO, Shuaib F, Gsteiger S. Ebola virus disease outbreak in Nigeria: Transmission dynamics and rapid control. *Epidemics* 2015; **11**: 80–4.
- 10 Gignoux E, Idowu R, Bawo L, *et al.* Use of Capture-Recapture to Estimate Underreporting of Ebola Virus Disease, Montserrado County, Liberia. *Emerg Infect Dis* 2015; **21**: 2265–7.
- 11 Meltzer MI, Atkins CY, Santibanez S, *et al.* Estimating the future number of cases in the Ebola epidemic--Liberia and Sierra Leone, 2014-2015. *MMWR Suppl* 2014; **63**: 1–14.
- 12 Scarpino S V, Iamarino A, Wells C, *et al.* Epidemiological and viral genomic sequence analysis of the 2014 ebola outbreak reveals clustered transmission. *Clin Infect Dis* 2015; **60**: 1079–82.
- 13 Kucharski AJ, Camacho A, Flasche S, Glover RE, Edmunds WJ, Funk S. Measuring the impact of Ebola control measures in Sierra Leone. *Proc Natl Acad Sci U S A* 2015; **112**: 14366–71.
- 14 UNMEER. Sierra Leone: Ebola emergency Weekly Situation Report No. 7. 2014 [https://www.humanitarianresponse.info/system/files/documents/files/UNMEER\\_NERC\\_SitRep\\_07Dec.pdf](https://www.humanitarianresponse.info/system/files/documents/files/UNMEER_NERC_SitRep_07Dec.pdf).
- 15 Enserink M. How many Ebola cases are there really? | Science | AAAS. 2014. <http://www.sciencemag.org/news/2014/10/how-many-ebola-cases-are-there-really> (accessed Jan 28, 2017).

# Zika

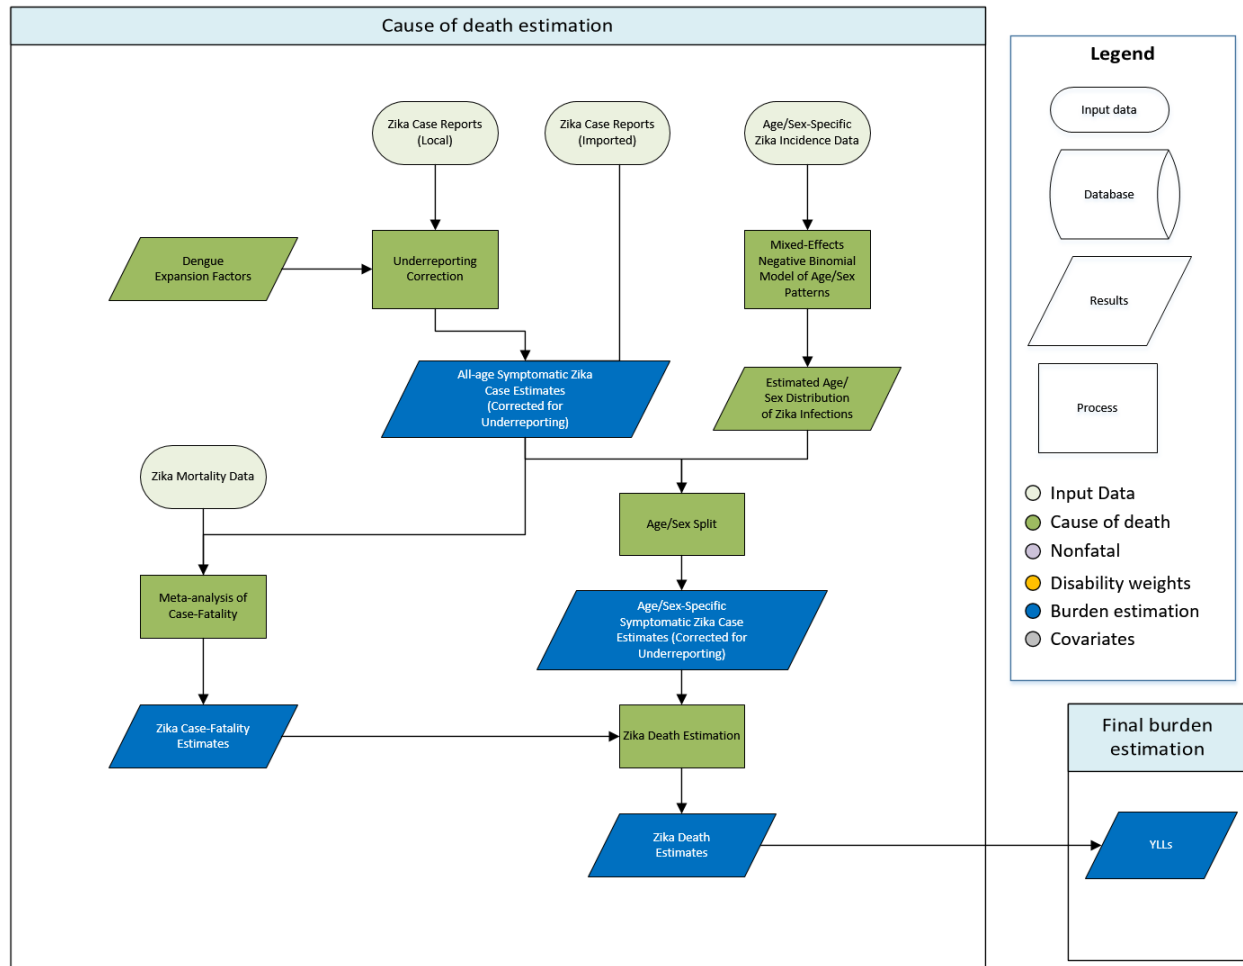

## Input data

Case data and death data come from official reports, primarily from PAHO.

## Modeling strategy

We model Zika deaths using a natural history approach in which we estimate deaths as the product of cases and case fatality. We estimate the number of true symptomatic cases as the product of reported cases and country-specific expansion factors that adjust for underreporting. Those expansion factors are derived from our dengue model and the methods used for their estimation are detailed in the dengue model documentation and by Stanaway et al<sup>1</sup>.

We then use an intercept only, mixed-effects Poisson regression model, with random effects on location, to estimate case fatality. Here, our outcome variable is reported Zika deaths and our exposure variable is estimated number of symptomatic Zika cases. For location-years with reported Zika deaths, we estimate deaths from the fixed effects (i.e. intercept and offset) and random effects, including



uncertainty from both effects. For location-years with no Zika death reports, but with reported Zika cases, we estimate deaths from the fixed effects and sample from the distribution of all random effects.

## Reference

1 Stanaway JD, Shepard DS, Undurraga EA, Halasa YA, Coffeng LE, Brady OJ, et al. The global burden of dengue: an analysis from the Global Burden of Disease Study 2013. *The Lancet Infectious Diseases* [Internet]. 2016 Feb

## Other neglected tropical diseases (NTDs)

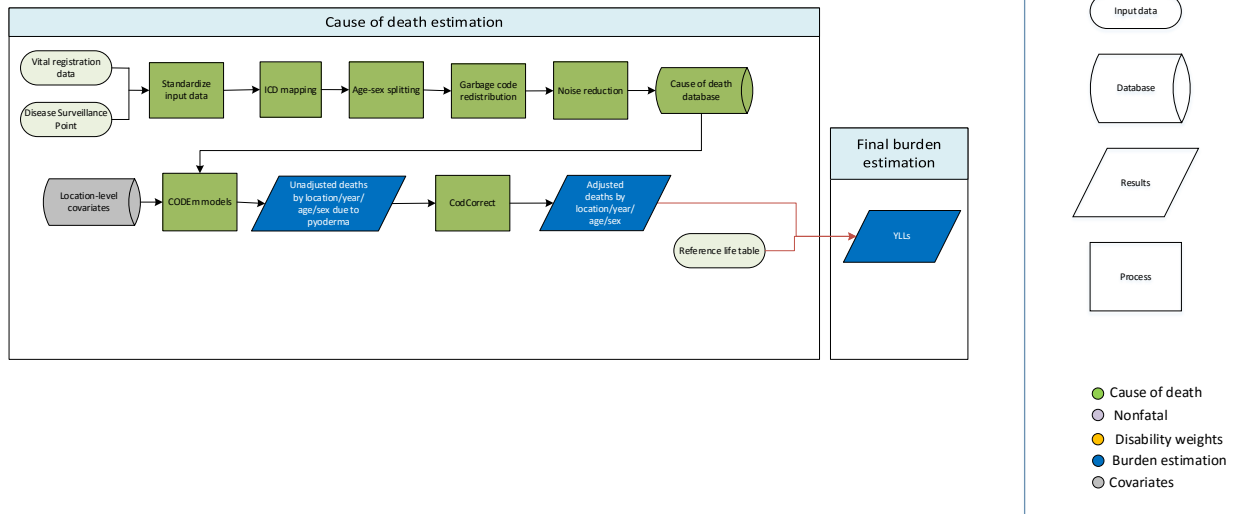

### Input data

We modelled other neglected tropical disease mortality using all available data in the cause of death database. Data points were outliered if they reported an improbable number of deaths or if their inclusion in the model yielded distorted trends.

### Modelling strategy

We modelled other neglected tropical disease mortality using a two-model hybrid approach: 1) a global CODEm model of all locations, using all data in the CoD database; and 2) a CODEm model restricted to data-rich countries.

We have made no substantive changes in the modelling strategy for other neglected tropical disease from GBD 2015.

## Maternal disorders

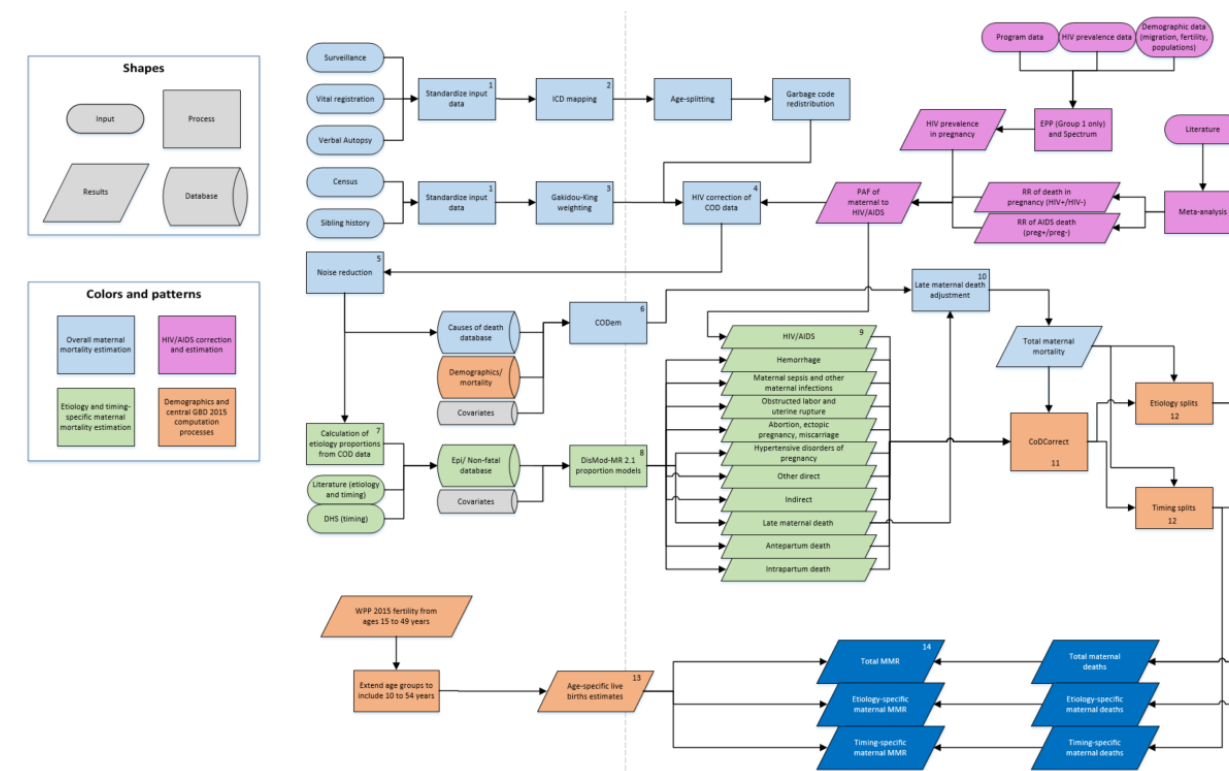

### Input data

CODEm models were informed by centrally prepped data stored in the cause of death (COD) database using standardized processes to adjust for bias due to incompleteness, misclassification, and zero counts. Our GBD 2016 case definition for maternal mortality continues to be all pregnancy-related deaths excluding accidental or incidental causes up to 1 year after the end of the pregnancy.

An updated literature review to inform the relative risk of mortality in pregnancy in HIV-positive versus HIV-negative women produced 23 leads and one usable source. We completed this search on August 30, 2016, using the following search string:

```
( HIV[Title/Abstract] OR "Acquired Immunodeficiency Syndrome"[Title/Abstract] OR AIDS[Title/Abstract] ) AND ( "pregnant"[Title/Abstract] OR "pregnancy"[Title/Abstract] OR "postpartum"[Title/Abstract] OR "post partum"[Title/Abstract] ) AND ( "mortality"[Title/Abstract] OR "death"[Title/Abstract] ) NOT "case report" AND "humans"[MeSH Terms] AND ( 2011/07/06[PDat] : 2016/12/31[PDat] )
```

Correction for incidental HIV deaths was completed during the data preparation phase. Spectrum outputs of HIV prevalence in pregnancy were combined with relative risk of mortality during pregnancy (HIV+ versus HIV-negative) to calculate PAFs. A proportion of these deaths are incidental and a proportion are maternal as determined from two studies that looked at the relative risk of death in HIV positive women who are pregnant versus non-pregnant. All data was corrected using the PAFs. Incidental deaths were removed from sibling history and census data, while maternal HIV deaths were

added to VR data. The maternal proportion of the PAF was retained to be combined with estimates of the aetiologic-proportion from other causes as described below.

DisMod-MR 2.1 aetiology proportion models were informed by two sources of data. First, we completed a systematic literature review on August 30, 2016, using the search string below:

```
( ( ( "maternal mortality"[Title/Abstract] OR "maternal death"[Title/Abstract] OR "MM"[Title/Abstract] OR "confidential enquiry"[Title/Abstract] OR ( ( obstetric[Title/Abstract] OR pregnancy[Title/Abstract] ) AND (etiology[Title/Abstract] OR cause[Title/Abstract] or pattern[Title/Abstract] ) AND ( death[Title/Abstract] OR mortality[Title/Abstract] ) ) ) AND "humans"[MeSH Terms] NOT ( fetal[Title/Abstract] OR newborns[Title/Abstract] OR newborn[Title/Abstract] OR neonatal[Title/Abstract] OR "case report"[Title/Abstract] OR "case study"[Title/Abstract] OR pathogenesis[Title/Abstract] OR thromboprophylaxis[Title/Abstract] ) ) OR ( ("maternal mortality"[Title/Abstract] OR "maternal death*" [Title/Abstract] OR "MMR"[Title/Abstract]) AND ("Afghanistan"[Title/Abstract] OR "Albania"[Title/Abstract] OR "Algeria"[Title/Abstract] OR "Andorra"[Title/Abstract] OR "Angola"[Title/Abstract] OR "Antigua and Barbuda"[Title/Abstract] OR "Argentina"[Title/Abstract] OR "Armenia"[Title/Abstract] OR "Azerbaijan"[Title/Abstract] OR "Bahrain"[Title/Abstract] OR "Bangladesh"[Title/Abstract] OR "Barbados"[Title/Abstract] OR "Belarus"[Title/Abstract] OR "Belize"[Title/Abstract] OR "Benin"[Title/Abstract] OR "Bhutan"[Title/Abstract] OR "Bolivia"[Title/Abstract] OR "Bosnia and Herzegovina"[Title/Abstract] OR "Botswana"[Title/Abstract] OR "Brazil"[Title/Abstract] OR "Brunei"[Title/Abstract] OR "Bulgaria"[Title/Abstract] OR "Burkina Faso"[Title/Abstract] OR "Burundi"[Title/Abstract] OR "Cambodia"[Title/Abstract] OR "Cameroon"[Title/Abstract] OR "Cape Verde"[Title/Abstract] OR "Central African Republic"[Title/Abstract] OR "Chad"[Title/Abstract] OR "China"[Title/Abstract] OR "Colombia"[Title/Abstract] OR "Comoros"[Title/Abstract] OR "Congo"[Title/Abstract] OR "Costa Rica"[Title/Abstract] OR "Croatia"[Title/Abstract] OR "Cuba"[Title/Abstract] OR "Cyprus"[Title/Abstract] OR "Côte d'Ivoire"[Title/Abstract] OR "Democratic Republic of the Congo"[Title/Abstract] OR "Djibouti"[Title/Abstract] OR "Dominica"[Title/Abstract] OR "Dominican Republic"[Title/Abstract] OR "Ecuador"[Title/Abstract] OR "Egypt"[Title/Abstract] OR "El Salvador"[Title/Abstract] OR "Equatorial Guinea"[Title/Abstract] OR "Eritrea"[Title/Abstract] OR "Ethiopia"[Title/Abstract] OR "Federated States of Micronesia"[Title/Abstract] OR "Fiji"[Title/Abstract] OR "Gabon"[Title/Abstract] OR "Georgia"[Title/Abstract] OR "Ghana"[Title/Abstract] OR "Grenada"[Title/Abstract] OR "Guatemala"[Title/Abstract] OR "Guinea"[Title/Abstract] OR "Guinea-Bissau"[Title/Abstract] OR "Guyana"[Title/Abstract] OR "Haiti"[Title/Abstract] OR "Honduras"[Title/Abstract] OR "India"[Title/Abstract] OR "Indonesia"[Title/Abstract] OR "Iran"[Title/Abstract] OR "Iraq"[Title/Abstract] OR "Jamaica"[Title/Abstract] OR "Jordan"[Title/Abstract] OR "Kazakhstan"[Title/Abstract] OR "Kenya"[Title/Abstract] OR "Kiribati"[Title/Abstract] OR "Kuwait"[Title/Abstract] OR "Kyrgyzstan"[Title/Abstract] OR "Laos"[Title/Abstract] OR "Latvia"[Title/Abstract] OR "Lebanon"[Title/Abstract] OR "Lesotho"[Title/Abstract] OR "Liberia"[Title/Abstract] OR "Libya"[Title/Abstract] OR "Lithuania"[Title/Abstract] OR "Macedonia"[Title/Abstract] OR "Madagascar"[Title/Abstract] OR "Malawi"[Title/Abstract] OR "Malaysia"[Title/Abstract] OR "Maldives"[Title/Abstract] OR "Mali"[Title/Abstract] OR "Malta"[Title/Abstract] OR "Marshall Islands"[Title/Abstract] OR "Mauritania"[Title/Abstract] OR "Mauritius"[Title/Abstract] OR "Moldova"[Title/Abstract] OR "Mongolia"[Title/Abstract] OR "Montenegro"[Title/Abstract] OR "Morocco"[Title/Abstract] OR "Mozambique"[Title/Abstract] OR "Myanmar"[Title/Abstract] OR "Namibia"[Title/Abstract] OR "Nepal"[Title/Abstract] OR "Nicaragua"[Title/Abstract] OR "Niger"[Title/Abstract] OR "Nigeria"[Title/Abstract] OR "North Korea"[Title/Abstract] OR "Oman"[Title/Abstract] OR "Pakistan"[Title/Abstract] OR "Palestine"[Title/Abstract] OR "Panama"[Title/Abstract] OR "Papua New Guinea"[Title/Abstract] OR "Paraguay"[Title/Abstract] OR "Peru"[Title/Abstract] OR "Philippines"[Title/Abstract] OR "Qatar"[Title/Abstract] OR "Romania"[Title/Abstract] OR "Russia"[Title/Abstract] OR "Rwanda"[Title/Abstract] OR "Saint Lucia"[Title/Abstract] OR "Saint Vincent and the Grenadines"[Title/Abstract] OR "Samoa"[Title/Abstract] OR "Saudi Arabia"[Title/Abstract] OR "Senegal"[Title/Abstract] OR "Serbia"[Title/Abstract] OR "Seychelles"[Title/Abstract] OR "Sierra Leone"[Title/Abstract] OR "Singapore"[Title/Abstract] OR "Solomon Islands"[Title/Abstract] OR "Somalia"[Title/Abstract] OR "South Africa"[Title/Abstract] OR "South Sudan"[Title/Abstract] OR "Sri Lanka"[Title/Abstract] OR "Sudan"[Title/Abstract] OR "Suriname"[Title/Abstract] OR "Swaziland"[Title/Abstract] OR "Syria"[Title/Abstract] OR "São Tomé and Príncipe"[Title/Abstract] OR "Taiwan"[Title/Abstract] OR "Tajikistan"[Title/Abstract] OR "Tanzania"[Title/Abstract] OR "Thailand"[Title/Abstract] OR "The Bahamas"[Title/Abstract] OR "The Gambia"[Title/Abstract] OR "Timor-Leste"[Title/Abstract] OR "Togo"[Title/Abstract] OR "Tonga"[Title/Abstract] OR "Trinidad and Tobago"[Title/Abstract] OR "Tunisia"[Title/Abstract] OR "Turkmenistan"[Title/Abstract] OR "Uganda"[Title/Abstract] OR "Ukraine"[Title/Abstract] OR "United Arab Emirates"[Title/Abstract] OR "Uruguay"[Title/Abstract] OR "Uzbekistan"[Title/Abstract] OR "Vanuatu"[Title/Abstract] OR "Venezuela"[Title/Abstract] OR "Vietnam"[Title/Abstract] OR "Yemen"[Title/Abstract] OR "Zambia"[Title/Abstract] OR "Zimbabwe"[Title/Abstract] ) AND "humans"[MeSH] NOT ( "demographic and health survey*" [Title/Abstract] OR DHS[Title/Abstract] OR "reproductive health survey*" [Title/Abstract] OR
```

RHS[Title/Abstract] ) ) AND ( 2015/04/30[PDat] : 2016/12/31[PDat] ) ) OR ( ( HIV[Title/Abstract] OR "Acquired Immunodeficiency Syndrome"[Title/Abstract] OR AIDS[Title/Abstract] ) AND ( "pregnant"[Title/Abstract] OR "pregnancy"[Title/Abstract] OR "postpartum"[Title/Abstract] OR "post partum"[Title/Abstract] ) AND ( "mortality"[Title/Abstract] OR "death"[Title/Abstract] ) NOT "case report" AND "humans"[MeSH Terms] AND ( 2011/07/06[PDat] : 2016/12/31[PDat] ) )

A total of 698 sources were reviewed for their title and abstract. Of those selected for full text review, 17 had usable data for aetiology-specific maternal mortality models. All data were prepped as “proportion” of total maternal deaths due to that cause. The second source of data was from the COD database. All aetiology-specific COD data were processed to be “proportion” data by calculating the cause-specific deaths divided by the total maternal deaths for the matching data source, year, age, and location. Owing to the large volume of total COD data and small sample sizes in many locations, COD data were collapsed around each of the five-year periods for which DisMod-MR 2.1 makes distinct estimates (1990, 1995, 2000, 2005, 2010, and 2016). Late maternal death data were only included for the subset of locations where they were reliably coded in raw VR. All data were uploaded to the nonfatal database.

### Modelling strategy

Overall maternal mortality was estimated with CODEm. All data from all geographies were reviewed. Outliers were identified as those data where age patterns or temporal patterns were inconsistent with neighbouring age groups or locations or where sparse data were predicting implausible overall temporal or age patterns for a given location.

DisMod-MR 2.1 proportion models for each sub-cause of maternal mortality were all single-parameter meta-regression models. Because many sources do not include the entire cause list, a series of study covariates were used to facilitate crosswalking back to the reference definition. The reference definition **includes** “other” direct obstetric complications, indirect maternal deaths, and late maternal death. Country covariates were specific for each model and included abortion legality (for abortion, ectopic pregnancy, and miscarriage), log-transformed lag-distributed income (for sepsis and late maternal death), and logit-transformed in-facility delivery proportion (for haemorrhage, hypertensive disorders of pregnancy, and obstructed labour). The time window was set at +/- 2 years for all models except late maternal death, which was +/- 5 years. The narrower window ensured that any given year of VR data only informed a single estimate.

We corrected the time trend in the CODEm model by identifying the year in which each location began consistently using O95 and O96 codes for late maternal death. These were identified as the earliest year in which the threshold proportion of total maternal deaths coded to late exceeded the lowest reported in the literature (0.5%). After a location was identified as having started using late maternal death codes, we assumed that practice continued. We adjusted upward results for all years prior to the advent of late maternal death coding using the outputs of the late maternal death proportion DisMod model.

Etiology-specific estimates were derived by multiplying the proportion outputs from DisMod-MR 2.1 by the total maternal deaths for that age-group, location, and year. HIV-related maternal deaths were estimated for all locations using the PAF approach described above for mortality data processing.

## ICD10 and ICD9 codes used for maternal disorders

| Model                                    | ICD10 code                                                                                                                                                                | ICD9 code                                                        |
|------------------------------------------|---------------------------------------------------------------------------------------------------------------------------------------------------------------------------|------------------------------------------------------------------|
| Abortion, ectopic pregnancy, miscarriage | O00-O08, O36.4                                                                                                                                                            | 631, 633-639                                                     |
| Maternal hemorrhage                      | O20, O43.2, O44-O46, O62.2, O67, O72                                                                                                                                      | 640-641, 661.0, 666                                              |
| Hypertensive disorders of pregnancy      | O11-O16                                                                                                                                                                   | 642.3, 642.4, 642.5, 642.6, 642.7, 642.9                         |
| Obstructed labor and uterine rupture     | O64-O66, O71, O83                                                                                                                                                         | 659-660, 662, 665, 669.5, 669.6                                  |
| Maternal sepsis and other infections     | O23, O41, O75.2-3, O85, O86, O91                                                                                                                                          | 646.5, 646.6, 659.2, 659.3, 670, 672.0, 674.1, 674.2, 674.3, 675 |
| Other maternal disorders                 | O09-O09.93, O21-O22-O22.93, O26-26.93, O28-O28.9, O29-O29.93, O30-O35.9, O40-O43.93, O47-48.1, O60-O61.9, O63-O63.9, O68-O70.9, O73-O77.9, O80-O84, O87-O90.9, O92-O92.79 | 646-646.44, 646.7-646.93, 648.1-649.9                            |
| Indirect maternal disorders              | O24-O25.3, O98-O99.91                                                                                                                                                     | 647-649.64                                                       |

## Dismod Proportion Models Covariates and Coefficients

### *Abortion, ectopic pregnancy and miscarriage*

| Study-level covariate             | Parameter  | Geography level | beta                  | Exponentiated beta |
|-----------------------------------|------------|-----------------|-----------------------|--------------------|
| Only Maternal Direct Causes       | Proportion | Global          | 0.20 (0.19 — 0.20)    | 1.22 (1.21 — 1.22) |
| Hospital Inpatient                | Proportion | Global          | 0.30 (0.30 — 0.30)    | 1.35 (1.35 — 1.35) |
| Late maternal deaths not included | Proportion | Global          | - 0.20 (0.20 — 0.20)  | 1.22 (1.22 — 1.22) |
| Country-Level Covariate           |            |                 |                       |                    |
| Legality of Abortion              | Proportion | Global          | 0.054 (0.054 — 0.055) | 1.06 (1.06 — 1.06) |

*Maternal hemorrhage*

| Study-level covariate             | Parameter  | Geography level | beta                  | Exponentiated beta |
|-----------------------------------|------------|-----------------|-----------------------|--------------------|
| Only Maternal Direct Causes       | Proportion | Global          | 0.20 (0.18 — 0.20)    | 1.22 (1.20 — 1.22) |
| Hospital Inpatient                | Proportion | Global          | 0.30 (0.29 — 0.30)    | 1.35 (1.34 — 1.35) |
| Late maternal deaths not included | Proportion | Global          | 0.20 (0.20 — 0.20)    | 1.22 (1.22 — 1.22) |
| Country-level covariate           |            |                 |                       |                    |
| In-Facility Delivery (proportion) | Proportion | Global          | 0.100 (0.100 — 0.100) | 1.11 (1.10 — 1.11) |

*Hypertensive disorders of pregnancy*

| Study-level covariate             | Parameter  | Geography level | beta                  | Exponentiated beta |
|-----------------------------------|------------|-----------------|-----------------------|--------------------|
| Only Maternal Direct Causes       | Proportion | Global          | 0.20 (0.19 — 0.20)    | 1.22 (1.21 — 1.22) |
| Hospital Inpatient                | Proportion | Global          | 0.30 (0.30 — 0.30)    | 1.35 (1.34 — 1.35) |
| Late maternal deaths not included | Proportion | Global          | 0.20 (0.20 — 0.20)    | 1.22 (1.22 — 1.22) |
| Country-level covariate           |            |                 |                       |                    |
| In-Facility Delivery (proportion) | Proportion | Global          | 0.100 (0.100 — 0.100) | 1.11 (1.11 — 1.11) |

*Obstructed labor and uterine rupture*

| Study-level covariate             | Parameter  | Geography level | beta                  | Exponentiated beta |
|-----------------------------------|------------|-----------------|-----------------------|--------------------|
| Only Maternal Direct Causes       | Proportion | Global          | 0.20 (0.20 — 0.20)    | 1.22 (1.22 — 1.22) |
| Hospital Inpatient                | Proportion | Global          | 0.30 (0.30 — 0.30)    | 1.35 (1.35 — 1.35) |
| Late maternal deaths not included | Proportion | Global          | 0.20 (0.20 — 0.20)    | 1.22 (1.22 — 1.22) |
| Country-level covariate           |            |                 |                       |                    |
| In-Facility Delivery (proportion) | Proportion | Global          | 0.100 (0.100 — 0.100) | 1.11 (1.11 — 1.11) |

Maternal sepsis and other infections

| Study-level covariate             | Parameter  | Geography level | beta                  | Exponentiated beta |
|-----------------------------------|------------|-----------------|-----------------------|--------------------|
| Only Maternal Direct Causes       | Proportion | Global          | 0.20 (0.20 — 0.20)    | 1.22 (1.22 — 1.22) |
| Hospital Inpatient                | Proportion | Global          | 0.30 (0.30 — 0.30)    | 1.35 (1.35 — 1.35) |
| Late maternal deaths not included | Proportion | Global          | 0.20 (0.20 — 0.20)    | 1.22 (1.22 — 1.22) |
| Country-level covariates          |            |                 |                       |                    |
| LDI (\$ per capita)               | Proportion | Global          | 0.100 (0.100 — 0.100) | 1.11 (1.10 — 1.11) |

Other Maternal Disorders

| Study-level covariate             | Parameter  | Geography level | beta                  | Exponentiated beta |
|-----------------------------------|------------|-----------------|-----------------------|--------------------|
| Only Maternal Direct Causes       | Proportion | Global          | 0.20 (0.19 — 0.20)    | 1.22 (1.21 — 1.22) |
| Hospital Inpatient                | Proportion | Global          | 0.20 (0.19 — 0.20)    | 1.22 (1.21 — 1.22) |
| Late maternal deaths not included | Proportion | Global          | 0.20 (0.20 — 0.20)    | 1.22 (1.22 — 1.22) |
| Country-level covariate           |            |                 |                       |                    |
| LDI (\$ per capita)               | Proportion | Global          | 0.100 (0.100 — 0.100) | 1.11 (1.10 — 1.11) |

Indirect Maternal Disorders

| Study-level covariate             | Parameter  | Geography level | beta                  | Exponentiated beta |
|-----------------------------------|------------|-----------------|-----------------------|--------------------|
| Hospital Inpatient                | Proportion | Global          | 0.20 (0.20 — 0.30)    | 1.22 (1.22 — 1.22) |
| Late maternal deaths not included | Proportion | Global          | 0.20 (0.20 — 0.20)    | 1.22 (1.22 — 1.22) |
| Country-level covariate           |            |                 |                       |                    |
| LDI (\$ per capita)               | Proportion | Global          | 0.100 (0.100 — 0.100) | 1.11 (1.11 — 1.11) |



## Neonatal disorders

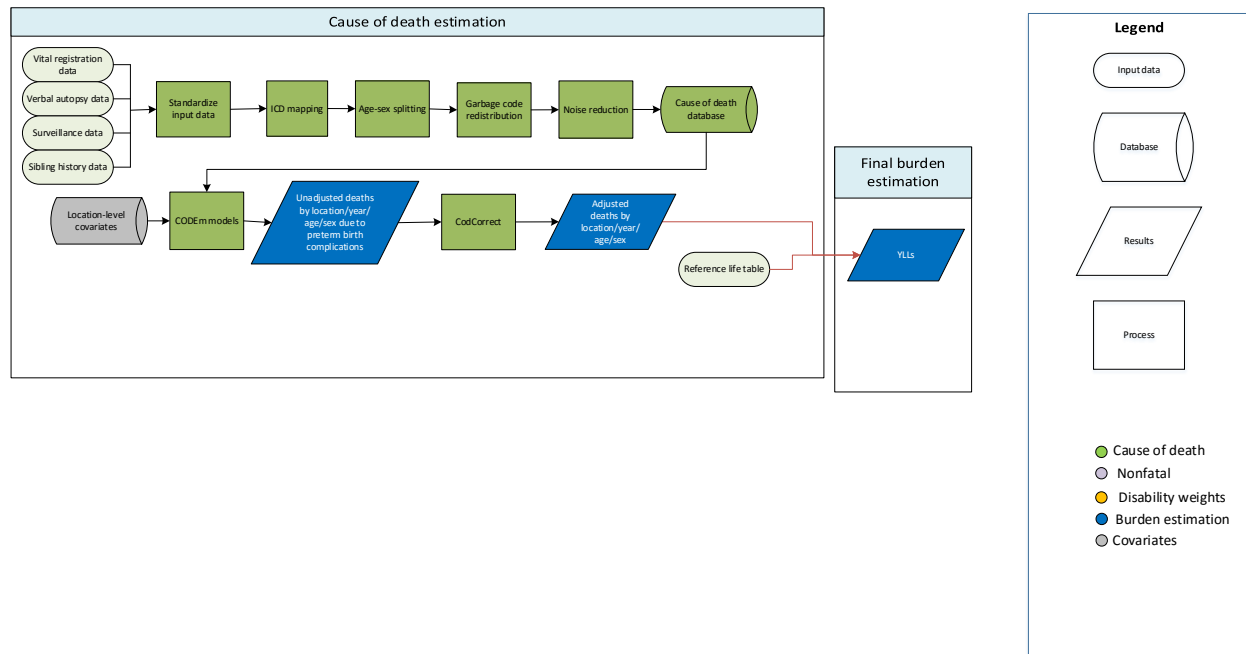

### Input data

For the neonatal disorders envelope, preterm birth complications, and neonatal encephalopathy, vital registration, verbal autopsy, surveillance, and sibling history data were used for GBD 2016 to estimate number of deaths from each condition. For sepsis and other neonatal infections, vital registration, surveillance, and sibling history data were used. And for neonatal hemolytic disease and other neonatal conditions, vital registration and surveillance data were used. For all neonatal causes of death, vital registration was by far the most common data type. We only modelled deaths among males and females under age 5. Data points were selected as outliers if they were implausibly high, low, or significantly conflicted with established age or temporal patterns. Addition of significant new data from the Sample Registration System (SRS) in India had a significant effect on the estimates of mortality due to neonatal conditions at the global level.

### Modelling strategy

For GBD 2016, an ensemble modelling approach was used via CODEm to model each of the different neonatal conditions. The same was done for GBD 2013 and 2015.

Varying levels of data quality and coding issues may still have affected our results. Validation studies suggest that verbal autopsy methods tend to be less accurate for cause of death ascertainment in the neonatal age groups.<sup>1-4</sup> This implies that in regions such as sub-Saharan Africa or South Asia, where the data primarily come from verbal autopsy studies, the distribution of sub-causes within all neonatal conditions may be less accurate. Furthermore, validation studies suggest that verbal autopsy methods tend to be particularly poor at ascertaining deaths from neonatal sepsis. Thus, for GBD 2016, all verbal autopsy data were excluded for neonatal sepsis and neonatal hemolytic disease.

## Selected Covariates

| Covariate                                              | Transformation | Level | Direction |
|--------------------------------------------------------|----------------|-------|-----------|
| Education (years per capita)                           | None           | 3     | -1        |
| Health System Access                                   | None           | 2     | -1        |
| In-Facility Delivery                                   | None           | 2     | -1        |
| LDI (I\$ per capita)                                   | Log            | 3     | -1        |
| Underweight (proportion <2SD weight for age, <5 years) | None           | 2     | 1         |
| Live Births 35+                                        | None           | 2     | 1         |
| Indoor Air Pollution (All cooking fuels)               | None           | 1     | 1         |
| Smoking prevalence (Reproductive Age-Standardized)     | None           | 1     | 1         |
| Total Fertility Rate                                   | Log            | 3     | 1         |
| SDI                                                    | None           | 3     | -1        |
| HAQI                                                   | None           | 2     | -1        |
| Skilled Birth Attendance                               | None           | 2     | -1        |
| Antenatal Care (4 visit)                               | None           | 2     | -1        |

## References

- 1 Anker M, Black RE, Coldham C, *et al.* A Standard Verbal Autopsy Method for Investigating Causes of Death in Infants and Children. Geneva, Switzerland: World Health Organization Department of Communicable Disease Surveillance and Response; The Johns Hopkins School of Hygiene and Public Health; The London School of Hygiene and Tropical Medicine, 1999.
- 2 Kalter HD, Gray RH, Black RE, Gultiano SA. Validation of postmortem interviews to ascertain selected causes of death in children. *Int J Epidemiol* 1990; **19**: 380–6.
- 3 Quigley MA, Armstrong Schellenberg JR, Snow RW. Algorithms for verbal autopsies: a validation study in Kenyan children. *Bull World Health Organ* 1996; **74**: 147–54.
- 4 Snow RW, Armstrong JR, Forster D, *et al.* Childhood deaths in Africa: uses and limitations of verbal autopsies. *The Lancet* 1992; **340**: 351–5.

## Nutritional deficiencies: Protein-energy malnutrition, Iron-deficiency anaemia, Iodine deficiency, Vitamin A deficiency, and other nutritional deficiencies

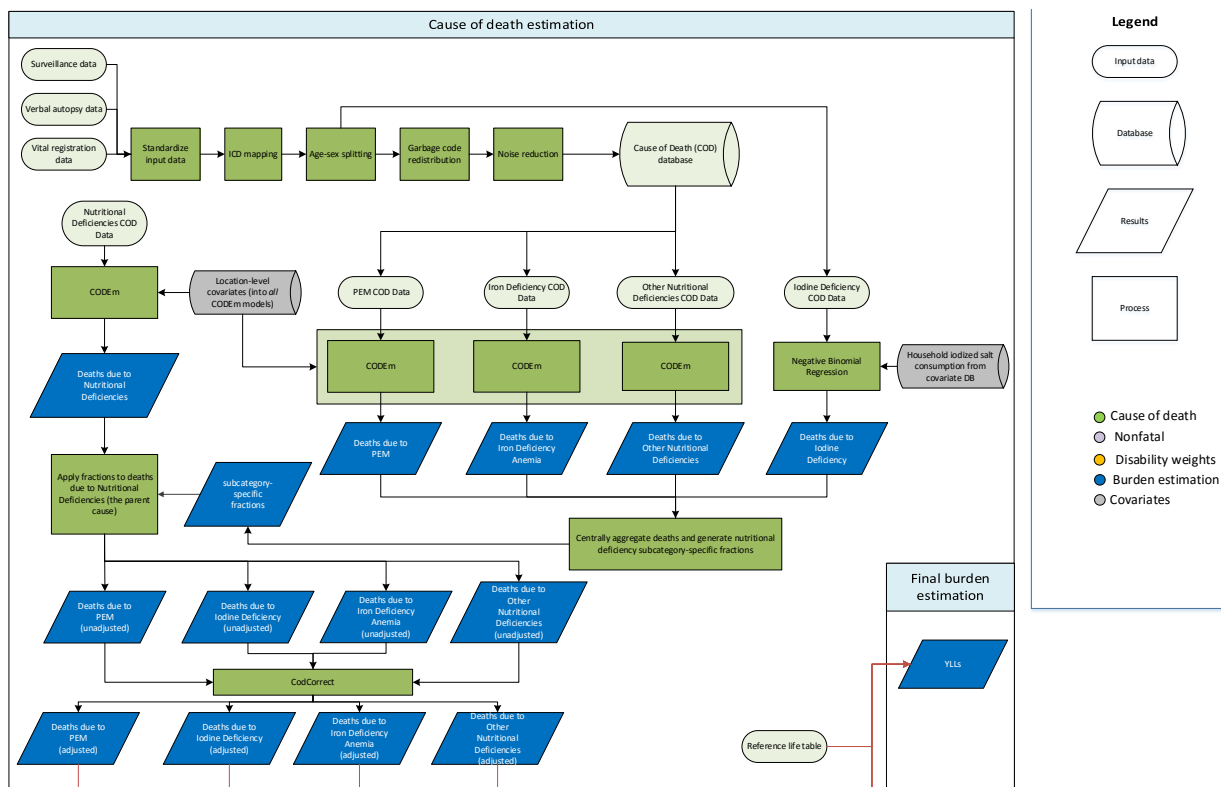

### Input data and case definitions

For GBD 2016, vital registration, verbal autopsy, and surveillance data were used to model deaths due to nutritional deficiencies. As described in other sections, the volume of new data was significant. Notable additions include Sample Registration System (SRS) from states of India and provinces of Indonesia. ICD codes, which can be interpreted as case definitions, for each of the nutritional deficiencies is listed in the table below.

| GBD cause                      | ICD-10 code                                                                                                                                                          |
|--------------------------------|----------------------------------------------------------------------------------------------------------------------------------------------------------------------|
| Protein-energy malnutrition    | E40-E46.9 (Kwashiorkor, marasmus, specified and unspecified protein calorie malnutrition)                                                                            |
| Iron-deficiency anemia         | D50.1-D50.8 (iron deficiency anemia)                                                                                                                                 |
| Iodine deficiency              | E00-E02 (congenital iodine-deficiency syndrome, iodine-deficiency related thyroid disorders and allied conditions, and subclinical iodine-deficiency hypothyroidism) |
| Other nutritional deficiencies | D51-D52.0 (vitamin B12 deficiency anemia and folate deficiency anemia)                                                                                               |
| Other nutritional deficiencies | D52.8-D53.9 (other nutritional anemias)                                                                                                                              |

|                                |                                                                                                                                                                                         |
|--------------------------------|-----------------------------------------------------------------------------------------------------------------------------------------------------------------------------------------|
| Other nutritional deficiencies | D64.3 (other sideroblastic anemias)                                                                                                                                                     |
| Other nutritional deficiencies | E51-E61.9 (thiamine, niacin, other B group vitamins, ascorbic acid, vitamin D, other vitamin, dietary calcium, dietary selenium, dietary zinc, and other nutrient element deficiencies) |
| Other nutritional deficiencies | E63-E64.0 (other nutritional deficiencies and sequelae of protein-calorie malnutrition)                                                                                                 |
| Other nutritional deficiencies | E64.2-E64.9 (sequelae of vitamin C deficiency, rickets, other nutritional deficiencies, and unspecified nutritional deficiencies)                                                       |
| Other nutritional deficiencies | M12.1-M12.19 (Kaschin-Beck disease)                                                                                                                                                     |
| Garbage code                   | D50, D50.0 and D50.9 (unspecified anemia)                                                                                                                                               |

### Modelling strategy

Other than data and covariate updates, we did not make any modeling strategy changes for GBD 2016.

We estimated mortality for each of the nutritional deficiencies in two steps. CODEm was first used to generate mortality estimates for total nutritional deficiencies. The sub-categories of nutritional deficiencies, namely protein-energy malnutrition, iodine deficiency, iron-deficiency anaemia, and other nutritional deficiencies, were modelled separately. We assumed zero mortality due to Vitamin A deficiency, instead analyzing it as a cause of nonfatal disease burden and a risk factor for mortality due to other causes. We outliered data that were largely conflicting with the majority of data from other studies conducted either in the same or different countries (with similar socio-demographic characteristics) in the same region.

CODEm was used to model all sub-categories except for iodine deficiency. The CODEm covariates (including level and direction) used for each of the models are listed in the table below. The covariate used in the iodine deficiency model is “proportion of households using iodized salt.”

| Nutritional deficiencies (overall) |                                                                                                    |           |
|------------------------------------|----------------------------------------------------------------------------------------------------|-----------|
| Level                              | Covariate                                                                                          | Direction |
| 1                                  | Age-standardized prevalence of severe anemia                                                       | +         |
|                                    | Malnutrition shock mortality rate                                                                  | +         |
|                                    | Proportion of children 0-5 with weight-for-age z-score < -2                                        | +         |
|                                    | Proportion of children 0-5 with weight-for-height z-score < -2                                     | +         |
|                                    | Proportion of households using iodized salt                                                        | -         |
|                                    | Total kcal per person per day availability                                                         | -         |
| 2                                  | Population living in the 1 <sup>st</sup> world quintile (least) of annual rainfall                 | +/-       |
|                                    | Population living in the 2 <sup>nd</sup> world quintile (2 <sup>nd</sup> least) of annual rainfall | +/-       |
|                                    | Sanitation (proportion with access)                                                                | -         |
|                                    | Mortality rate due to war shocks                                                                   | +         |
|                                    | Improved water source (proportion with access)                                                     | -         |
|                                    | Health Systems Access                                                                              | -         |
| 3                                  | Education (years per capita)                                                                       | -         |
|                                    | Lag distributed income per capita                                                                  | -         |
|                                    | Socio-demographic index                                                                            | -         |

|                                       |                                                                                                    |                  |
|---------------------------------------|----------------------------------------------------------------------------------------------------|------------------|
|                                       | Antenatal care (4 visits) coverage (proportion)                                                    | -                |
| <b>Protein-energy malnutrition</b>    |                                                                                                    |                  |
| <b>Level</b>                          | <b>Covariate</b>                                                                                   | <b>Direction</b> |
| 1                                     | Age-standardized prevalence of severe anemia                                                       | +                |
|                                       | Total kcal per person per day availability                                                         | -                |
|                                       | Malnutrition shock mortality rate                                                                  | +                |
|                                       | Proportion of children 0-5 with weight-for-height z-score < -2                                     | +                |
| 2                                     | Population living in the 1 <sup>st</sup> world quintile (least) of annual rainfall                 | +/-              |
|                                       | Population living in the 2 <sup>nd</sup> world quintile (2 <sup>nd</sup> least) of annual rainfall | +/-              |
|                                       | Sanitation (proportion with access)                                                                | -                |
|                                       | Mortality rate due to war shocks                                                                   | +                |
|                                       | Improved water source (proportion with access)                                                     | -                |
|                                       | Healthcare access and quality index                                                                | -                |
|                                       | Health Systems Access                                                                              | -                |
| 3                                     | Antenatal care (4 visits) coverage (proportion)                                                    | -                |
|                                       | Education (years per capita)                                                                       | -                |
|                                       | Lag distributed income per capita                                                                  | -                |
|                                       | Socio-demographic index                                                                            | -                |
| <b>Iron-deficiency anemia</b>         |                                                                                                    |                  |
| <b>Level</b>                          | <b>Covariate</b>                                                                                   | <b>Direction</b> |
| 1                                     | Proportion of children 0-5 with weight-for-age z-score < -2                                        | +                |
|                                       | Age-standardized prevalence of severe anemia                                                       | +                |
| 2                                     | Population living in the 1 <sup>st</sup> world quintile (least) of annual rainfall                 | +/-              |
|                                       | Population living in the 2 <sup>nd</sup> world quintile (2 <sup>nd</sup> least) of annual rainfall | +/-              |
|                                       | Sanitation (proportion with access)                                                                | -                |
|                                       | Total kcal per person per day availability                                                         | -                |
|                                       | Improved water source (proportion with access)                                                     | -                |
|                                       | Health Systems Access                                                                              | -                |
|                                       | Healthcare access and quality index                                                                | -                |
| 3                                     | Education (years per capita)                                                                       | -                |
|                                       | Lag distributed income per capita                                                                  | -                |
|                                       | Socio-demographic index                                                                            | -                |
| <b>Other nutritional deficiencies</b> |                                                                                                    |                  |
| <b>Level</b>                          | <b>Covariate</b>                                                                                   | <b>Direction</b> |
| 1                                     | Age-standardized prevalence of severe anemia                                                       | +                |
|                                       | Malnutrition shock mortality rate                                                                  | +                |
|                                       | Proportion of children 0-5 with weight-for-age z-score < -2                                        | +                |
| 2                                     | Population living in the 1 <sup>st</sup> world quintile (least) of annual rainfall                 | +/-              |
|                                       | Population living in the 2 <sup>nd</sup> world quintile (2 <sup>nd</sup> least) of annual rainfall | +/-              |
|                                       | Sanitation (proportion with access)                                                                | -                |
|                                       | Mortality rate due to war shocks                                                                   | +                |
|                                       | Improved water source (proportion with access)                                                     | -                |
|                                       | Total kcal per person per day availability                                                         | -                |
|                                       | Health Systems Access                                                                              | -                |
|                                       | Healthcare access and quality index                                                                | -                |
| 3                                     | Education (years per capita)                                                                       | -                |

|  |                                   |   |
|--|-----------------------------------|---|
|  | Lag distributed income per capita | – |
|  | Socio-demographic index           | – |

Iodine deficiency was modelled using a negative binomial regression model given the small number of deaths attributable to it. A negative binomial model is more appropriate than a Poisson count model as it accounts for greater variance (over-dispersion) in the data. By utilizing the exposure option in Stata, we model cause fractions with a negative binomial model. We tested both rate- and cause fraction-based models but selected a cause fraction model due to better model performance. We used vital registration data with proportion of household iodized salt consumption as a country-level covariate and dummy variables on age and sex to model mortality from iodine deficiency. Uncertainty was estimated by taking 1,000 iterations of the predictions based on the variance-covariance matrix and a random sample from a gamma distribution.

Estimates from the four nutritional sub-categories were then scaled at the 1,000 draw level in CODCorrect to match that for total nutritional deficiencies. Protein energy malnutrition and other nutritional deficiencies death estimates were also corrected for misclassification of Alzheimer and Parkinson disease deaths. Detailed information on this process can be found in section 4 of the appendix.

## Sexually transmitted infections excluding HIV

This write-up covers includes: Total sexually transmitted diseases (STI), Chlamydia, Gonorrhea, Syphilis, Trichomonas, Genital herpes due to HSV-2, and other STI.

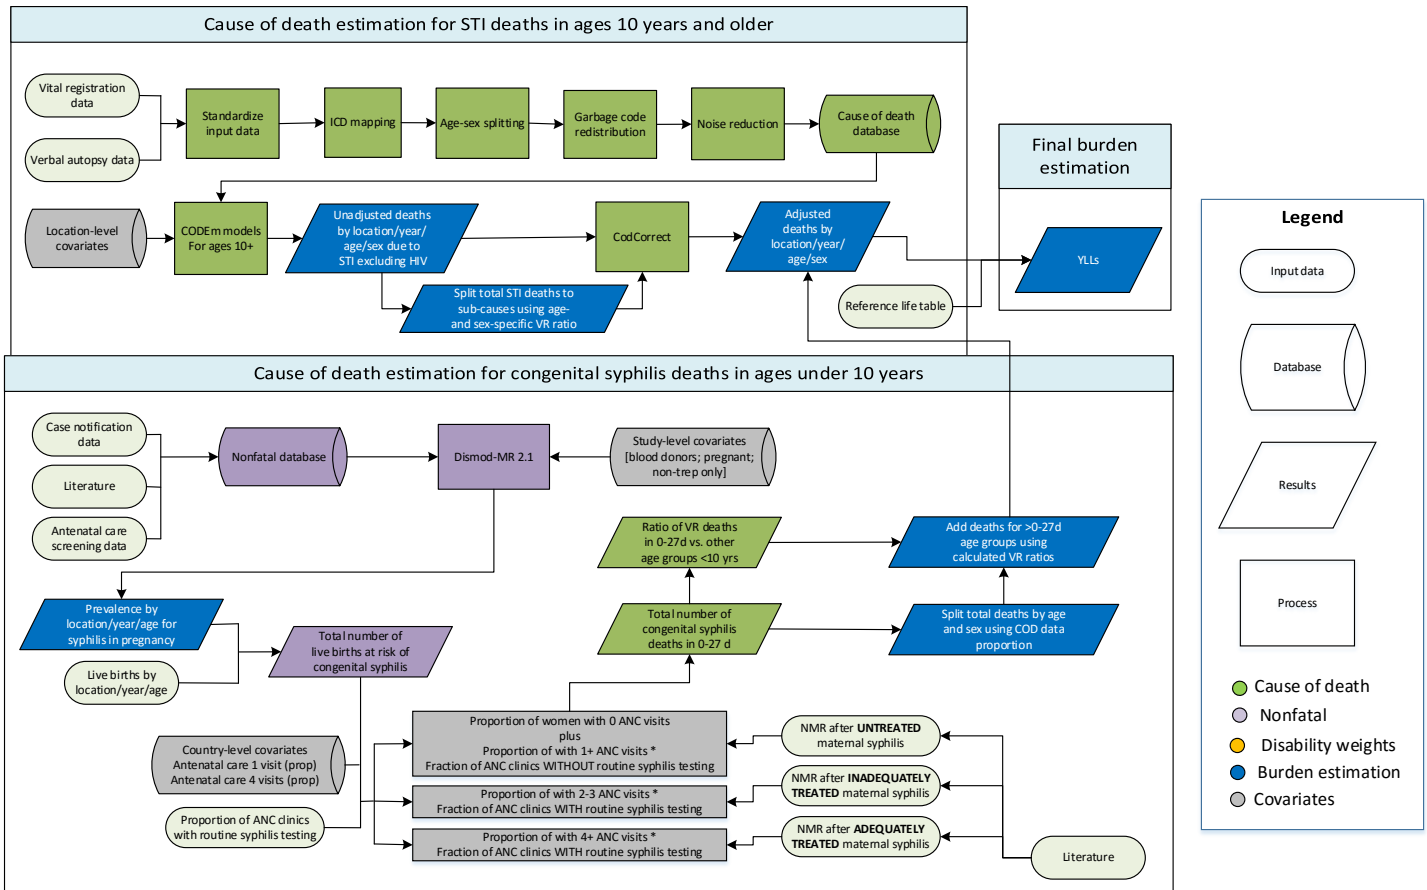

### Input data

For GBD 2016, STI cause of death models included syphilis, chlamydial infection, gonococcal infection, and other STIs. CODEm models for males and females 10 years and older were informed from centrally prepped data stored in the cause of death (COD) database. All data from all geographies were reviewed. Outliers were identified as those data where age patterns or temporal patterns were inconsistent with neighboring age groups or locations or where sparse data were predicting implausible overall temporal or age patterns for a given location.

Four different types of data were used for the natural history model (NHM) of congenital syphilis. First, we used literature, survey, and report data described below to estimate early syphilis in pregnancy. Second, we used GBD 2016 estimates of antenatal care (ANC) coverage data from our covariates database and live births estimates from our demographics analysis. Third, we used published data from the Global Health Observatory (updated in GBD 2015) on proportion of ANC clinics that test for syphilis and the proportion of women testing positive who receive treatment. Fourth, we used the results of a

systematic literature review completed for GBD 2010 to inform excess mortality of neonates born with syphilis.

### Modelling strategy

We completed data-rich (DR) and global CODEm models for ages 10 years and over for males and females separately. Nine covariates were used in each CODEm model, including 1) syphilis prevalence in pregnancy from DisMod-MR 2.1 analysis described below; 2) coverage of one antenatal care (ANC) visit, 3) coverage of four ANC visits; 4) age-specific fertility rate; 5) total fertility rate; 6) health system access, a principal components analysis of ANC, in-facility delivery, skilled birth attendance, and vaccine coverage; 7) national income per capita (LDI); 8) years of education per capita; and 9) abortion legality, an index that includes a categorical rating of abortion laws that range from 1 (always illegal) to 7 (always legal on demand) as well as a categorical variable on additional restrictions (eg, waiting period, family permission required) and gestational week at which abortion is allowed.

The overall CODEm model for STI was split into the sub-causes using vital registration (VR) data from the COD database. Trichomoniasis and HSV-2 are assumed not to cause mortality. Chlamydia is further assumed not to cause death in males. Cause-specific mortality rate VR data for each age group, sex, and year were summed and scaled to match the total STI cause-specific mortality rate predicted by CODEm. This VR pattern was applied globally to all locations.

Our NHM for congenital syphilis began with estimation of early syphilis prevalence in all age groups, both sexes, all GBD locations, and in each year from 1990 to 2016. We modelled early syphilis in DisMod-MR 2.2, restricting incidence before the age of 10 and after the age of 65 and assuming zero excess mortality from early syphilis. Study-level covariates identified data in non-reference categories (pregnant, blood donors) and using non-reference testing modalities (eg, treponemal test only, non-treponemal test only) and were crosswalked to the reference category within the DisMod-MR 2.1 cascade, predicting specific conversion values for each country. The latter specification of country-level crosswalks was chosen because the bias between non-reference populations and testing modalities was assumed to differ by geography and as a function of, for example, endemicity of acute infectious agents like malaria.

Age-specific prevalence results were paired with age-specific live birth results to generate total number of births at risk of congenital syphilis. To estimate the actual number of congenital syphilis births, we combined information on ANC coverage from GBD 2016 covariates analyses with ANC syphilis testing and treatment data from GHO. Adequate treatment was assumed to confer no risk of congenital syphilis mortality. Those with four ANC visits or 1–3 ANC visits with testing and treatment were assumed to have received adequate treatment. Inadequate treatment occurred in those women with 1–3 ANC visits without either testing or treatment or those women with one ANC visit but with testing and treatment. Those women with only one or no ANC visits and no syphilis testing or treatment were assumed to be untreated. Untreated and inadequate treatment proportions were combined with potential congenital syphilis births to estimate total neonatal syphilis births. Each categorical risk category was combined with corresponding neonatal excess mortality rates derived in GBD 2010. This total number of neonatal syphilis deaths was then split between 0–6 days and 7–27 days age groups using sex- and age-specific VR data from the COD database. Congenital syphilis deaths beyond the neonatal period were likewise estimated using sex- and age-specific VR data. This VR pattern was applied globally to all locations.



The primary limitation of our estimation of STI deaths in those over 10 years old is data availability, especially from countries where VR systems are not available. Even in countries with VR, there may be some variation in practices for coding deaths to STI as the underlying cause, especially given the potentially variable presentation of many of the conditions in this category. Such variation is more likely to lead to underestimation of STI deaths than overestimation. Sub-cause estimation is similarly limited by data availability in those locations without VR data, and our estimates are thus based on the overall pattern of deaths in generally higher-income geographies.

The primary implication of this limitation is that it decreases the resolution with which we can decompose the relationship between mortality from HIV and other STI. Our NHM for congenital syphilis continues to improve but still is limited by data availability issues, especially on the coverage and effectiveness of ANC interventions to prevent congenital syphilis. We do not have information on the proportion of women who tested positive who may have received treatment elsewhere, or information on the coverage of treatment for neonates, infants, and children born with congenital syphilis. Both limitations could potentially have led to lower estimates of congenital syphilis deaths. On the other hand, our DisMod-MR 2.2 analysis suggested that pregnant women may in fact have higher syphilis prevalence than the general population, which would have led to higher estimates. We have also not quantified the number of stillbirths associated with congenital syphilis.

No other significant changes were made for GBD 2016.

# Hepatitis

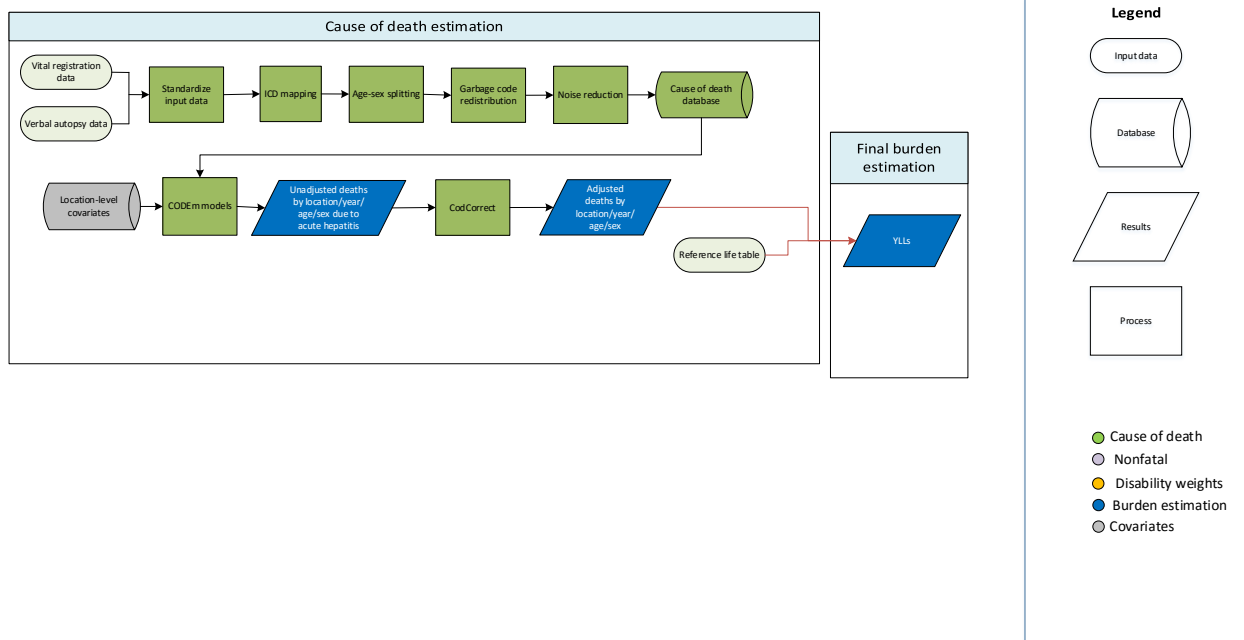

## Input data

We modelled hepatitis mortality using all available data in the cause of death database. Data points were outliered if they reported an improbable number of hepatitis deaths or if their inclusion in the model yielded distorted trends. In some cases multiple data sources for the same location differed dramatically both in their quality and reported hepatitis mortality (eg, a verbal autopsy and vital registration source). In these cases the lower-quality data source was outliered.

## Modelling strategy

We modelled hepatitis mortality using a two-model hybrid approach: 1) a global CODEm model of all locations, using all data in the CoD database; and 2) a CODEm model restricted to data-rich countries. Since GBD 2013 we have switched from a single global model to the hybrid global/data-rich model approach. We have otherwise made no substantive changes in the modelling strategy for hepatitis from GBD 2013.

## Acute hepatitis A

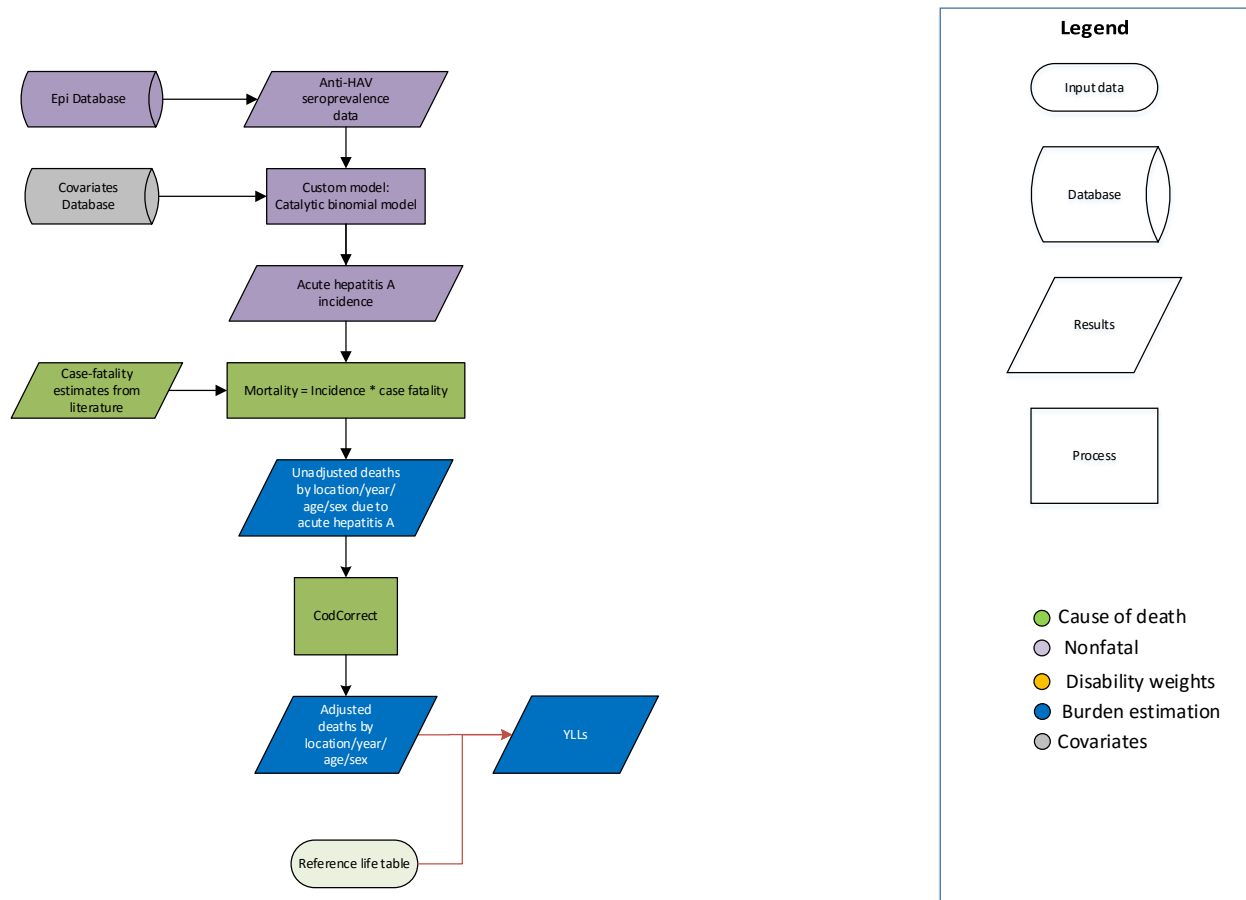

### Input data

We use anti-HAV seroprevalence data from population-based studies and surveys for the incidence model.

### Modelling strategy

Virus-specific CoD data for acute hepatitis are inconsistently reported and of questionable accuracy. We therefore use a two-part modelling strategy for acute hepatitis A, B, C, and E. First, we develop a parent acute hepatitis mortality model using CODEm and all acute hepatitis mortality data within the CoD database. Second, we develop four separate natural history models to estimate deaths from acute hepatitis A, B, C, and E, respectively. Finally, we rescale the virus-specific death estimates from the four natural history models to fit within the envelope defined by the parent acute hepatitis CoD model.

Given its reasonably stable force of infection among susceptible people across age groups, we used a catalytic binomial model to estimate incidence of acute hepatitis A based on anti-HAV seroprevalence. The catalytic binomial model is a binomial generalized linear model with a complementary log-log link, and an offset term for log-age. Since anti-HAV is a lifetime marker of past infection, and a given individual can only be infected once, seroprevalence at age  $t$  is equal to the cumulative incidence (CI) over  $t$  years. Assuming constant force of infection, we can estimate the incidence rate (IR) as

$$CI = 1 - e^{-IR \cdot t}$$

We can rearrange this equation to solve for the log-IR:

$$\ln(IR) = \frac{\ln(-\ln(1 - CI))}{\ln(t)}$$

Thus, by using the complimentary log-log link for CI (i.e.,  $\ln(-\ln(1-CI))$ ) with an offset for log-age, we are able to model the incidence rate of infection from seroprevalence data. To inform the model in the absence of data we use a predictive covariate derived from principal components analysis of lag-distributed income (LDI) and the proportion of the population with access to improved water. We use a mixed effects model with fixed effects on the aforementioned PCA-derived covariate, and nested hierarchical random effects on super-region, region, and time.

Our overall approach has not changed from that used in GBD 2013. However, whereas we previously used a fixed-effects only catalytic binominal model for GBD 2013, we have incorporated random effects into the model for GBD 2016, improving the spatial structure of the model and allowing the model to better follow data.

## Acute hepatitis B

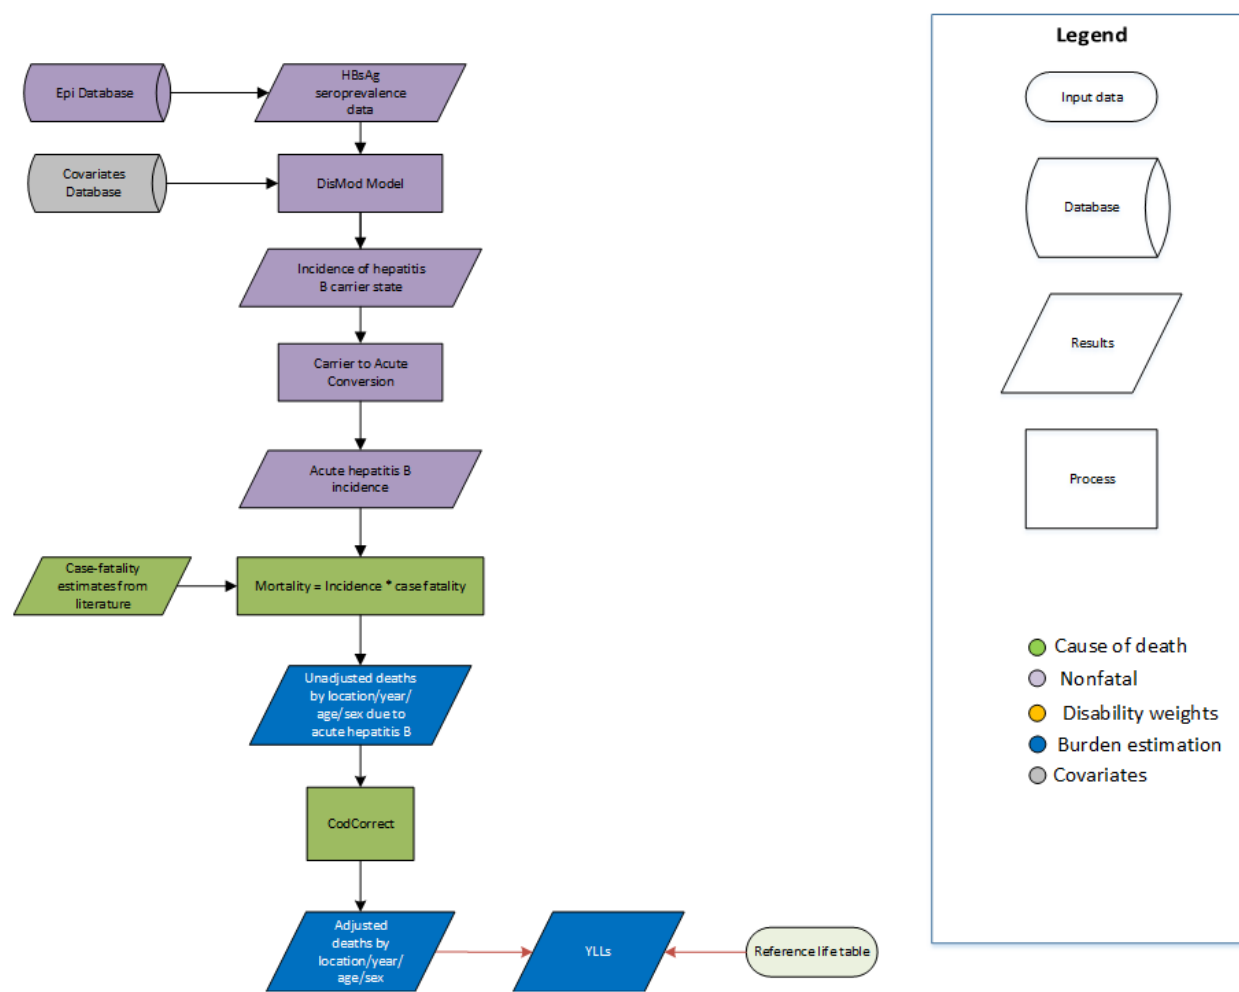

### Input data

We use hepatitis B surface antigen (HBsAg) seroprevalence data from population-based studies and surveys for the incidence model.

### Modelling strategy

Virus-specific CoD data for acute hepatitis are inconsistently reported and of questionable accuracy. We therefore use a two-part modelling strategy for acute hepatitis A, B, C, and E. First, we develop a parent acute hepatitis mortality model using CODEm and all acute hepatitis mortality data within the CoD database. Second, we develop four separate natural history models to estimate deaths from acute hepatitis A, B, C, and E, respectively. Finally, we rescale the virus-specific death estimates from the four natural history models to fit within the envelope defined by the parent acute hepatitis CoD model.

We model the incidence of chronic HBsAg carriage using a full DisMod model of HBsAg seroprevalence. We then convert incidence of chronic carriage to total incidence of hepatitis B infection by dividing age-specific estimates of the incidence of chronic carriage by age-specific estimates of the probability of infection resulting in carriage from Edmunds et al 1993 <sup>2</sup>. We then multiply incident infection estimates by estimates of probability of acute incidence, derived from cases in McMahon et al 1997 <sup>3</sup> and sampling from a beta distribution to propagate uncertainty. Lastly, using the estimates of acute hepatitis B infection, we multiply by the case fatality of acute hepatitis B using estimates derived from cases in Bianco et al 2003 <sup>4</sup> & Stoffolini et al 1997 <sup>5</sup>, sampling from a beta distribution to propagate uncertainty. The equations below describes the above text:

$$\begin{aligned} \text{Incident infection} &= \frac{\text{Chronic carriage}}{\beta_1} \\ \text{Incident acute infection} &= \text{Incidence infection} * \beta_2 \\ \text{Acute deaths} &= \text{Acute infection} * \beta_3 \end{aligned}$$

Where

$\beta_1$  = Probability of chronic infection  
 $\beta_2$  = Probability of acute infection  
 $\beta_3$  = Case fatality rate

## Acute hepatitis C

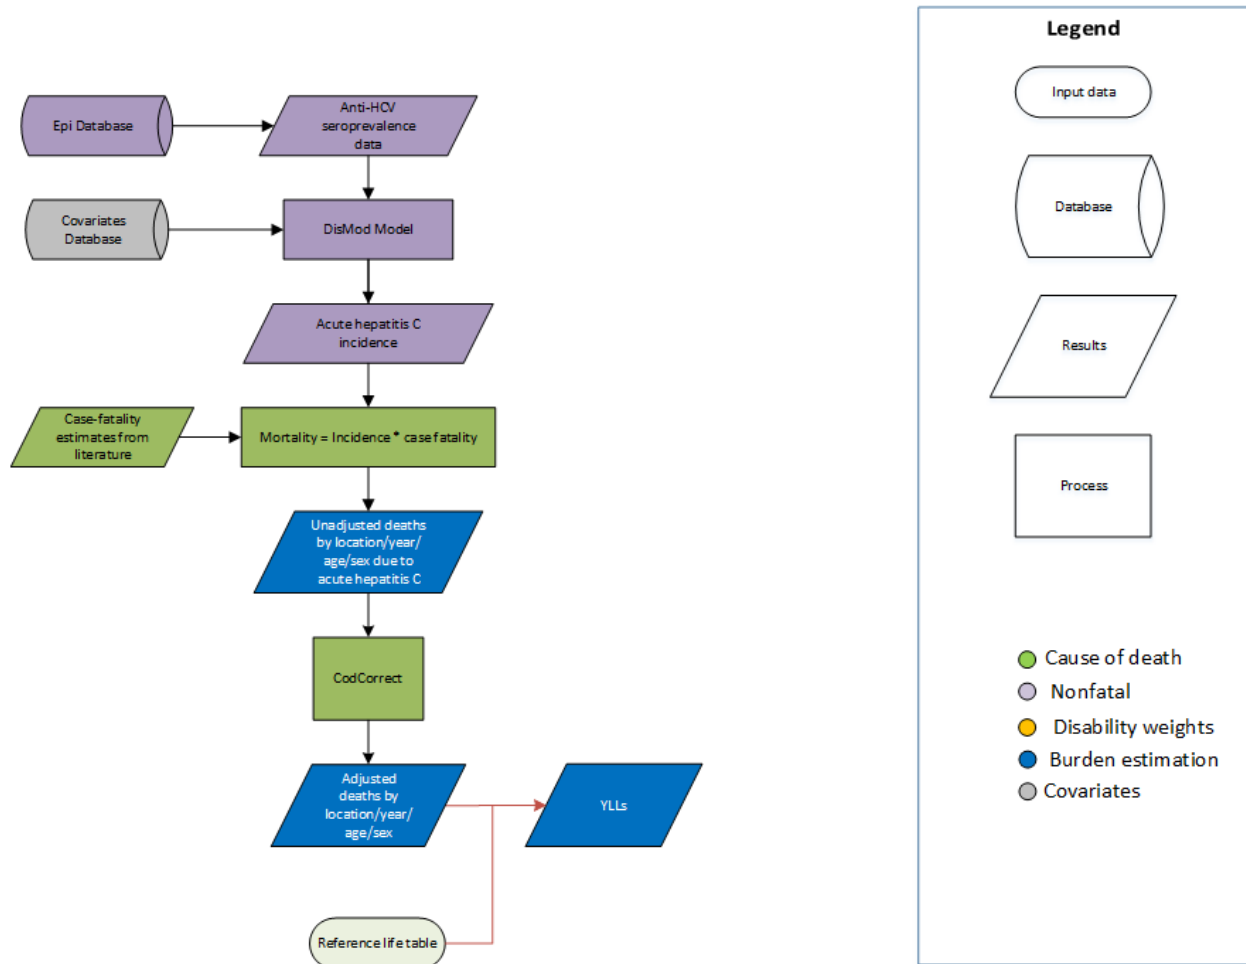

### Input data

We use anti-HCV seroprevalence data from population-based studies and surveys for the incidence model.

### Modelling strategy

Virus-specific CoD data for acute hepatitis are inconsistently reported and of questionable accuracy. We therefore use a two-part modelling strategy for acute hepatitis A, B, C, and E. First, we develop a parent acute hepatitis mortality model using CODEm and all acute hepatitis mortality data within the CoD database. Second, we develop four separate natural history models to estimate deaths from acute hepatitis A, B, C, and E, respectively. Finally, we rescale the virus-specific death estimates from the four natural history models to fit within the envelope defined by the parent acute hepatitis CoD model.

We model the incidence of hepatitis C using a full DisMod model of anti-HCV seroprevalence and estimate acute hepatitis C deaths as the product of these incidence estimates and published estimates of acute hepatitis C case fatality [Stroffolini et al 1997], sampling from a beta distribution to propagate uncertainty. The equation below describes the above discussion:

$$\textit{Acute deaths} = \textit{Acute incidence} * \beta$$

Where:

$\beta = \textit{Case fatality rate}$



## Acute hepatitis E

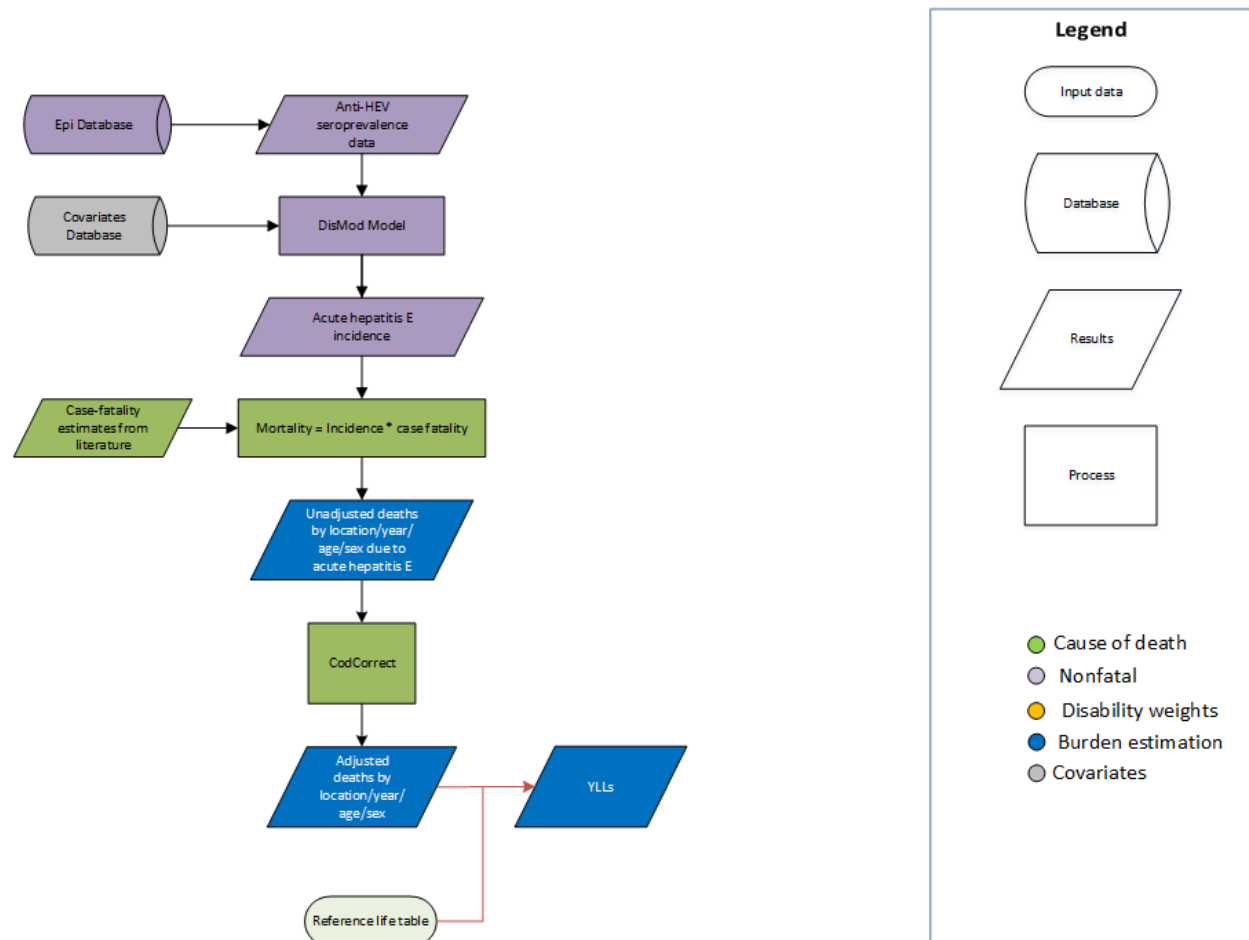

### Input data

We use anti-HEV seroprevalence data from population-based studies and surveys for the incidence model.

### Modelling strategy

Virus-specific CoD data for acute hepatitis are inconsistently reported and of questionable accuracy. We therefore use a two-part modelling strategy for acute hepatitis A, B, C, and E. First, we develop a parent acute hepatitis mortality model using CODEm and all acute hepatitis mortality data within the CoD database. Second, we develop four separate natural history models to estimate deaths from acute hepatitis A, B, C, and E, respectively. Finally, we rescale the virus-specific death estimates from the four natural history models to fit within the envelope defined by the parent acute hepatitis CoD model.

We model the incidence of hepatitis E using a full DisMod model of anti-HEV seroprevalence and estimate acute hepatitis E deaths as the product of these incidence estimates and published estimates of acute hepatitis E case fatality, accounting for the proportion of infections that occur in pregnant women and the higher case fatality of hepatitis E among pregnant women. Since HEV genotypes tend to

be less pathogenic and less virulent, we restrict hepatitis E deaths to countries in regions where genotypes 1 and 2 predominate (ie, Central Asia, Central sub-Saharan Africa, East Asia, Eastern sub-Saharan Africa, North Africa and Middle East, Oceania, South Asia, Southeast Asia, Southern sub-Saharan Africa, and Western sub-Saharan Africa).<sup>1</sup>

We have made no substantive changes in the modelling strategy from GBD 2013.

## Reference

1 Rein DB, Stevens GA, Theaker J, Wittenborn JS, Wiersma ST. The global burden of hepatitis E virus genotypes 1 and 2 in 2005. *Hepatology* 2012; 55: 988–97.

2 Edmunds, W. J., et al. "The influence of age on the development of the hepatitis B carrier state." *Proceedings of the Royal Society of London B: Biological Sciences* 253.1337 (1993): 197-201.

3 McMahon, Brian J. "Epidemiology and natural history of hepatitis B." *Seminars in liver disease*. Vol. 25. No. S 1. Published in 2005 by Thieme Medical Publishers, Inc., 333 Seventh Avenue, New York, NY 10001, USA., 2005.

4 Bianco, E., et al. "Case fatality rate of acute viral hepatitis in Italy: 1995–2000. An update." *Digestive and liver disease* 35.6 (2003): 404-408.

5 Guadagnino, Vincenzo, et al. "Prevalence, risk factors, and genotype distribution of hepatitis C virus infection in the general population: a community-based survey in southern Italy." *Hepatology* 26.4 (1997): 1006-1011.

## Other Infectious Diseases

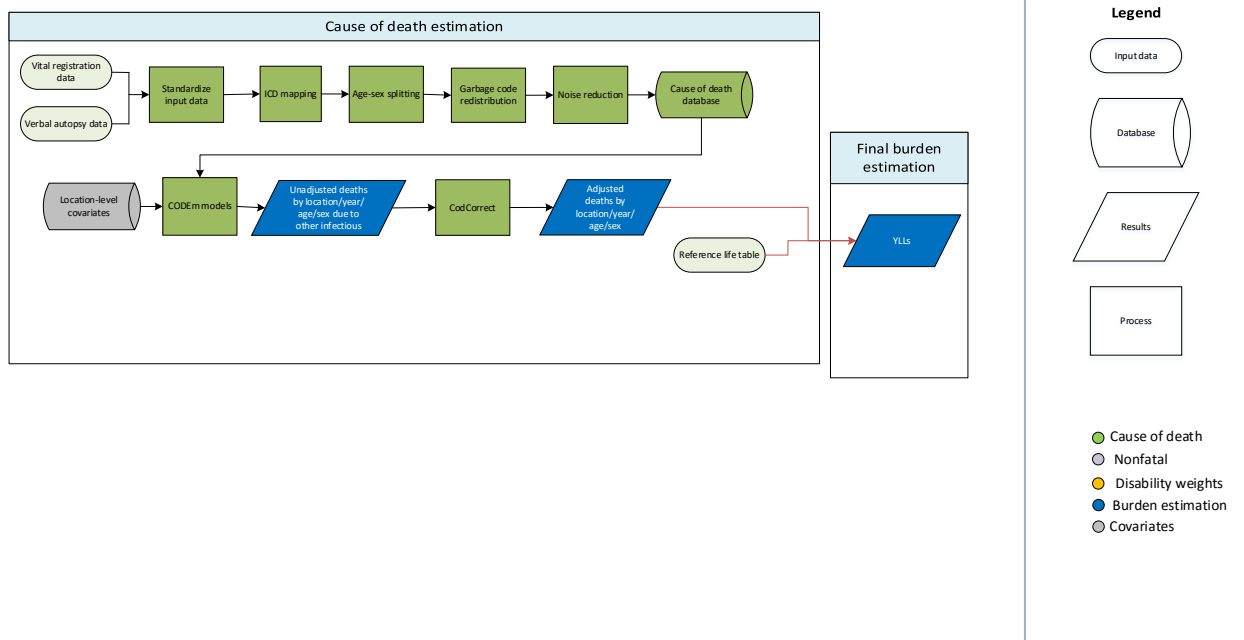

### Input data

We modelled other infectious disease mortality using all available data in the cause of death database. Data points were outliered if they reported an improbable number of deaths or if their inclusion in the model yielded distorted trends. In some cases multiple data sources for the same location differed dramatically both in their quality and reported other infectious diseases mortality (eg, a verbal autopsy and vital registration source). In these cases the lower-quality data source was outliered.

### Modelling strategy

We modeled other infectious disease mortality using a two-model hybrid approach: 1) a global CODEm model of all locations, using all data in the CoD database; and 2) a CODEm model restricted to data-rich countries.

Since GBD 2013 we have switched from a single global model to the hybrid global/data-rich model approach. We have otherwise made no substantive changes in the modelling strategy for other intestinal infectious diseases from GBD 2015.

## Cancers

Input data and methodological summary for all cancers except for non-melanoma skin cancer

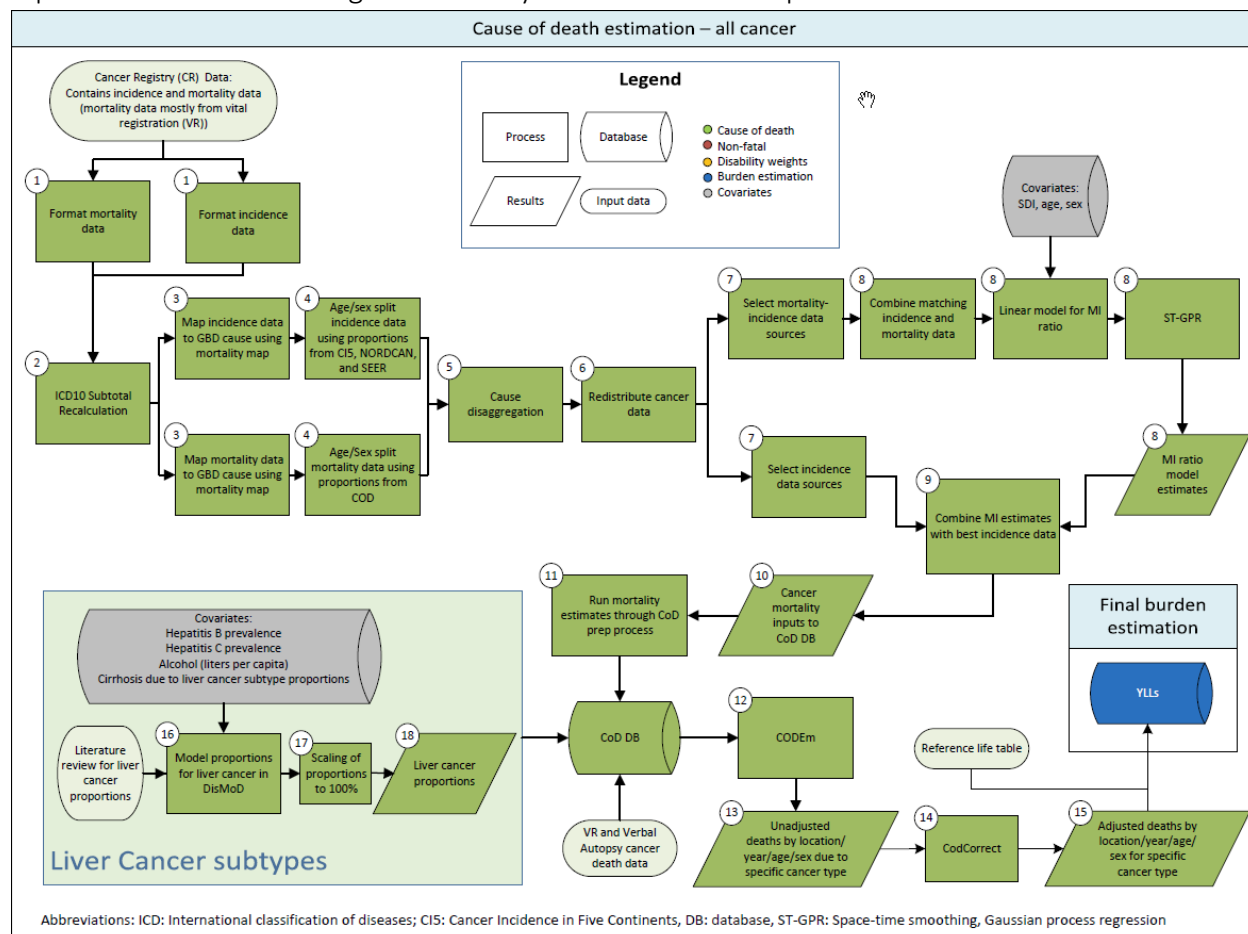

## Data

The cause of death (COD) database contains multiple sources of cancer mortality data. These sources include vital registration, verbal autopsy, and cancer registry data. The cancer registry mortality estimates that are uploaded into the COD database stem from cancer registry incidence data that have been transformed to mortality estimates through the use of mortality-to-incidence ratios (MIR).

### Data seeking processes

#### Cancer mortality data in the cause of death database other than cancer registry data

Sources for cancer mortality data other than cancer registry data are described in the COD database description (Section 2).

#### Cancer registry data

Cancer registry data were used from publicly available sources or provided by collaborators. We attempted to collect data from all registries that are members of the International Association of Cancer Registries (IACR) by either downloading publicly available data or contacting the registries. We also used cancer registry databases like Cancer Incidence in Five Continents (CI5), EUREG, and NORDCAN.<sup>1-9</sup>

Most cancer registries only report cancer incidence. However, if a cancer registry also reported cancer mortality, mortality data were also extracted from the source to be used in the MIR estimation.

#### *Inclusion and exclusion criteria*

Only population-based cancer registries were included, and only those that included all cancers (no specialty registries), data for all age groups, and data for both sexes. Pathology-based cancer registries were included if they had a defined population. Hospital-based cancer registries were excluded. Cancer registry data were excluded from either the final incidence data input or the MI model input if a more detailed source (e.g., providing more detailed age or diagnostic groups) was available for the same population. Preference was given to registries with national coverage over those with only local coverage, except those from countries where the GBD study provides subnational estimates. Data were excluded if the coverage population was unknown.

#### *Bias of categories of input data*

Cancer registry data can be biased in multiple ways. A high proportion of ill-defined cancer cases in the registry data requires redistribution of these cases to other cancers, which introduces a potential for bias. Changes between coding systems can lead to artificial differences in disease estimates; however, we adjust for this bias by mapping the different coding systems to the GBD causes. Underreporting of cancers that require advanced diagnostic techniques (e.g., leukemia and brain, pancreatic, and liver cancer) can be an issue in cancer registries from low-income countries. On the other hand, misclassification of metastatic sites as primary cancer can lead to overestimation of cancer sites that are common sites for metastases, like brain or liver. Since many cancer registries are located in urban areas, the representativeness of the registry for the general population can also be problematic. The accuracy of mortality data reported in cancer registries usually depends on the quality of the vital registration system. If the vital registration system is incomplete or of poor quality, the mortality-to-incidence ratio can be biased to lower ratios.

#### *Data for liver cancer etiology splits*

To find the proportion of liver cancer cases due to the four etiology groups included in GBD (1. Liver cancer due to hepatitis B, 2. Liver cancer due to hepatitis C, 3. Liver cancer due to alcohol, 4. Liver cancer due to other causes), a systematic literature search was performed in PubMed. Studies were included if the study population was representative of liver cancer population for the respective location. For each study the proportions of liver cancer due to the three specific risk factors were calculated. Remaining risk factors were included under a combined “other” group. Cryptogenic cases were only included if other etiologies like viral hepatitis or alcoholic cirrhosis had been excluded. If multiple risk factors were reported for an individual patient these were apportioned proportionally to the individual risk factors.

## **Methods**

#### *Steps of analysis and data transformation processes*

Cancer registry data went through multiple processing steps before integration with the COD database. First, the original data were transformed into standardized files, which included standardization of format, categorization, and registry names (#1 in flowchart).

Second, some cancer registries report individual codes as well as aggregated totals (e.g., C18, C19, and C20 are reported individually but the aggregated group of C18-C20 [colorectal cancer] is also reported in

the registry data). The data processing step “subtotal recalculation” (#2 in flowchart) verifies these totals and subtracts the values of any individual codes from the aggregates.

In the third step (#3 in the flowchart), cancer registry incidence data and cancer registry mortality data are mapped to GBD causes. A different map is used for incidence and for mortality data because of the assumption that there are no deaths for certain cancers. One example is basal cell carcinoma of the skin. In the cancer registry incidence data, basal cell carcinoma is mapped to non-melanoma skin cancer (basal cell carcinoma). However, if basal cell skin cancer is recorded in the cancer registry mortality data, the deaths are instead mapped to non-melanoma skin cancer (squamous cell carcinoma) under the assumption that they were indeed misclassified squamous cell skin cancers. Other examples are benign or in situ neoplasms. Benign or in situ neoplasms found in the cancer registry incidence dataset were simply dropped from that dataset. The same neoplasms reported in a cancer registry mortality dataset were mapped to the respective invasive cancer (e.g., melanoma in situ in the cancer registry incidence dataset was dropped from the dataset; melanoma in situ in the cancer registry mortality dataset was mapped to melanoma).

In the fourth data processing step (#4 in the flowchart) cancer registry data were standardized to the GBD age groups. Age-specific incidence rates were generated using CI5, SEER, and NORDCAN data, while age-specific mortality rates were generated from the CoD data through a method described in Part 2. Age-specific proportions were then generated by applying the age-specific rates to a given registry population that required age-splitting to produce the expected number of cases/deaths for that registry by age. The expected number of cases/deaths for each sex, age, and cancer were then normalized to 1, creating final, age-specific proportions. These proportions were then applied to the total number of cases/deaths by sex and cancer to get the age-specific number of cases/deaths.

In the rare case that the cancer registry only contained data for both sexes combined, the now-age-specific cases/deaths were split and re-assigned to separate sexes using the same weights that are used for the age-splitting process. Starting from the expected number of deaths, proportions were generated by sex for each age (e.g., if for ages 15 to 19 years old there are six expected deaths for males and four expected deaths for females, then 60% of the combined-sex deaths for ages 15-19 years would be assigned to males and the remaining 40% would be assigned to females).

In the fifth step (#5 in the flowchart) data for cause entries that are aggregates of GBD causes were redistributed. Examples of these aggregated causes include some registries reporting ICD10 codes C00-C14 together as, “lip, oral cavity, and pharyngeal cancer.” These groups were broken down into sub-causes that could be mapped to single GBD causes. In this example, those include lip and oral cavity cancer (C00-C08), nasopharyngeal cancer (C11), cancer of other parts of the pharynx (C09-C10, C12-C13), and “Malignant neoplasm of other and ill-defined sites in the lip, oral cavity, and pharynx” (C14). To redistribute the data, weights were created using the same “rate-applied-to-population” method employed in age-sex splitting (see step four above). For the undefined code (C14 in the example) an “average all cancer” weight was used, which was generated by adding all cases from SEER/NORDCAN/CI5 and dividing the total by the combined population. Then, proportions were generated by sub-cause for each aggregate cause as in the sex-splitting example above (see step four). The total number of cases from the aggregated group (C00-C14) was then recalculated for each

subgroup and the undefined code (C14). C14 was then redistributed as a “garbage code” in step six. Distinct proportions were used for C44 (non-melanoma skin cancer) and C46 (Kaposi’s sarcoma). Non-melanoma skin cancer processing is described under section “Input data and methodological summary for non-melanoma skin cancer (squamous-cell carcinoma).” C46 entries were redistributed as “other cancer,” HIV, and C80 (other and unknown cancers) using proportions described in Part 2. In the sixth step (#6 in the flowchart) unspecified codes (“garbage codes”) were redistributed. Redistribution of cancer registry incidence and mortality data mirrored the process of the redistribution used in the cause of death database (Part 2).

In the seventh step (#7 in the flowchart) duplicate or redundant sources were removed from the processed cancer registry dataset. Duplicate sources were present if, for example, the cancer registry was part of the CI5 database but we also had data from the registry directly. Redundancies occurred and were removed as described in “Inclusion and Exclusion Criteria,” where more detailed data were available, or when national registry data could replace regionally representative data. From here, two parallel selection processes were run to generate input data for the MI models and to generate incidence for final mortality estimation. Higher priority was given to registry data from the most standardized source when creating the final incidence input, whereas for the MI model input only sources that reported incidence and mortality were used. This is different to GBD 2015 where mortality and incidence could come from different sources as long as they covered the same population. In the eighth step (#8 in the flowchart) the processed incidence and mortality data from cancer registries were matched by cancer, age, sex, year, and location to generate MI ratios. These MI ratios were used as input for a three-step modelling approach using the general GBD ST-GPR approach with SDI as a covariate in the linear step mixed effects model using a logit link function. Predictions were made without the random effects. The ST-GPR model has three main hyper-parameters that control for smoothing across time, age, and geography. The time adjustment parameter ( $\lambda$ ) was set to 2, which aims to borrow strength from neighboring time points (i.e. the exposure in this year is highly correlated with exposure in the previous year but less so further back in time). The age adjustment parameter  $\omega$  was set to 0.5, which borrows strength from data in neighboring age groups. The space adjustment parameter  $\xi$  was set to 0.95 in locations with data and to 0.5 in locations without data (the higher  $\xi$  was applied when at least one age-sex group in the country of estimation had at least five unique data points. The lower  $\xi$  was applied when estimating data-scarce countries). Zeta aims to borrow strength across the hierarchy of geographical locations.<sup>10</sup> For the amplitude parameter in the Gaussian process regression we used 2 and for the scale we used a value of 15.

As in GBD 2015 we have modified the approach to estimate MI ratios. Since for GBD 2015 MI ratio predictions for some cancers yielded similar predictions for low-SDI countries without data as for high-SDI countries we refined the estimation process. Inclusion criteria for the MI ratio input data were changed to only include mortality and incidence data if they were reported by the same source. We excluded MI ratios reported in the CI5<sup>1,1-7</sup> since mortality data used for the calculation of these MI ratios by definition has to be independent from the cancer registry. We also revised the outlier process and excluded data based on the SDI quintile categorization rather than on development status. For each cancer, MI ratios from locations in SDI quintiles 1-4 (low to high-middle SDI) were dropped if they were below the median of MI ratios from locations in SDI quintile 5 (high SDI). We also dropped MI ratios from locations in SDI quintiles 1-4 if the MI ratios were above the third quartile + 1.5 \* IQR (inter-quartile range). We dropped all MIR that were based on less than 25 cases to avoid noise due to small

numbers except for mesothelioma and acute lymphoid leukemia where we dropped MIR that were based on less than 10 cases because of lower data availability for these two cancers. We also aggregated incidence and mortality to the youngest 5-year age bin where we had at least 50 data points to avoid MIR predictions in young age groups that were based on few data points. The MIR in the age-bin that was used to aggregate MIR to, was used to backfill the MIR for younger age groups.

Since MI ratios can be above 1, especially in older age groups and cancers with low cure rates, we used the 95<sup>th</sup> percentile of the cleaned dataset that only included MIR that were based on 50 or more cases, to cap the MIR input data. This “upper cap” was used to allow MIR over 1 but to constrain the MIR to a maximum level. To run the logit model, the input data was divided by the upper caps and model predictions after ST-GPR was rescaled by multiplying them by the upper caps.

Upper caps used for GBD 2016 were the following:

| Age group | Maximum MIR |
|-----------|-------------|
| 0-4       | 0.57        |
| 5-9       | 0.69        |
| 10-14     | 0.81        |
| 15-19     | 0.84        |
| 20-24     | 0.72        |
| 25-29     | 0.62        |
| 30-34     | 0.69        |
| 35-39     | 0.78        |
| 40-44     | 0.86        |
| 45-49     | 0.89        |
| 50-54     | 0.92        |
| 55-59     | 0.95        |
| 60-64     | 0.99        |
| 65-69     | 1.04        |
| 70-74     | 1.10        |
| 75-79     | 1.17        |
| 80+       | 1.32        |

To constrain the model at the lower end, we used the 5<sup>th</sup> percentile of the cancer specific cleaned MIR input data to replace all model predictions with this lower cap.

Final MI ratios were matched with the cancer registry incidence dataset in the ninth step (#9 in the flowchart) to generate mortality estimates ( $\text{Incidence} * \text{Mortality/Incidence} = \text{Mortality}$ ) (#10 in the flowchart). The final mortality estimates were then uploaded into the COD database (#11 in the flowchart). Cancer-specific mortality modelling then followed the general CODEm process.

#### *Liver cancer etiology split models*

The proportion data found through the systematic literature review were used as input for four separate DisMod-MR 2.1 models to determine the proportion of liver cancers due to the four subgroups for all locations, both sexes, and all age groups (step #16 in the flowchart). A study covariate was used for



publications that only assessed liver cancer in a cirrhotic population. The reference or “gold standard” that was used for crosswalking was the compilation of all studies that assessed the etiology of liver cancer in a general population. For liver cancer due to hepatitis C and hepatitis B, a prior value of 0 was set between age 0 and 0.01. For liver cancer due to alcohol a prior value of 0 was set for ages 0 to 5 years. For liver cancer due to hepatitis C, hepatitis C (IgG) seroprevalence was used as a covariate as well as a covariate for alcohol (liters per capita) and hepatitis B prevalence (HBsAg seroprevalence), forcing a negative relationship between the alcohol and hepatitis B covariate and the outcome of liver cancer due to hepatitis C proportion. For liver cancer due to hepatitis B, seroprevalence of HBsAg was used as a covariate as well as a covariate for alcohol and hepatitis C IgG seroprevalence, forcing a negative relationship between the alcohol and hepatitis C covariate and the outcome of liver cancer due to hepatitis B proportion. For liver cancer due to alcohol, alcohol (liters per capita) was used as a covariate as well as a covariate for proportion of alcohol abstainers, hepatitis B and hepatitis C seroprevalence, forcing a negative relationship between the proportion of alcohol abstainers, hepatitis B and hepatitis C covariates and the outcome of liver cancer due to alcohol proportion. All covariates used were modelled independently. To ensure consistency between cirrhosis and liver cancer estimates and to take advantage of the data for the respective other related cause (e.g. liver cancer due to hepatitis C and the related cause cirrhosis due to hepatitis C), we generated covariates from the liver cancer proportion models that we used in the cirrhosis etiology proportion models. We then created covariates from the cirrhosis etiology proportion models and used those in the liver cancer etiology models.

Since the proportion models are run independently of each other, the final proportion models were scaled to sum to 100% within each age, sex, year, and location, by dividing each proportion by the sum of the four (step # 17). For the liver cancer subtype mortality estimates, we multiplied the parent cause “liver cancer” by the corresponding scaled proportions (step # 18). Single cause estimates were adjusted to fit into the separately modelled all-cause mortality in the process CoDCorrect.

## Results

### Interpretation of results

Cancer mortality estimates for GBD 2016 can differ from the GBD 2015 results for multiple reasons. Updated cancer mortality data were added from vital registration system data, verbal autopsy studies, as well as cancer registry incidence data. Mapping of cancer ICD codes to the GBD cancer causes was updated slightly based on collaborator comments. Mapping for the ICD10 code D46 (myelodysplastic syndrome) was changed back to “other cancer” as it had been in GBD 2013 based on collaborator comments and the consideration of adding myelodysplastic syndrome as a separate cause for future GBD iterations. To improve estimation of the leukemia sub-causes, a new cause, “leukemia other” was added since not all leukemia subtypes can be mapped the four most common types (acute and chronic lymphoid and myeloid leukemia). The mortality-to-incidence ratio estimation has changed compared to GBD 2015. Covariate inputs for the CODEm models were changed based on recommendations from collaborators. Covariates used in CODEm models were updated for GBD 2016.

The other group producing country-level cancer mortality estimates is the International Agency for Research on Cancer (IARC) with their GLOBOCAN database. Significantly different methods between the GBD study and GLOBOCAN can lead to differences in results. Whereas estimates in GLOBOCAN are based on the assumption that there are “In theory, [...] as many methods as countries,”<sup>11</sup> the cancer estimation process for the GBD study follows a coherent, well-documented method for all cancers,

which allows cross-validation of models as well as determination of uncertainty. Another major difference is the ability in the GBD study to adjust single cause estimates to the all-cause mortality, which is being determined independently. This also allows us to adjust individual causes of death to the all-cause mortality envelope which permits us to correct for the underdiagnosis of cancer in countries with inadequate diagnostic resources. Redistribution of a fraction of undefined causes of death to certain cancers is another methodical advantage the GBD study has over GLOBOCAN, and estimates for cancer mortality can therefore differ substantially in countries with a large proportion of undefined causes of deaths in their vital registration data or a large proportion of undefined cancer cases in their cancer registry data.

## Limitations

There are certain limitations to consider when interpreting the GBD mortality cancer estimates. First, even though every effort is made to include the most recently available data for each country, data-seeking resources are not limitless and new data cannot always be accessed as soon as they are made available. It is therefore possible that the GBD study does not include all available data sources for cancer incidence or cancer mortality. Second, different redistribution methods can potentially change the cancer estimates substantially if the data sources used for the estimated location contain a large number of undefined causes; however, neglecting to account for these undefined deaths would likely introduce an even greater bias in the disease estimates. Third, using mortality-to-incidence ratios to transform cancer registry incidence data to mortality estimates requires accurate MIR. For GBD 2016 we have made further changes to the MIR estimation, but the method remains sensitive to underdiagnosis of cancer cases or underascertainment of cancer deaths. However, given that the majority of data used for the cancer mortality estimation come from vital registration data and not cancer registry data this is not a major limitation.

## Non-melanoma skin cancer (squamous-cell carcinoma)

### Data

#### *Data seeking processes*

The input data were identified and processed using the same methods as all other cancers described above.

#### *Inclusion and exclusion criteria*

Inclusion and exclusion criteria followed the same methods as described for other cancers (see above).

#### *Bias of categories of input data*

The potential biases of the input data are the same as for other cancers (see above).

### Methods

#### *Overall methodological process*

The GBD produces estimates for non-melanoma skin cancer via two subgroups: non-melanoma skin cancer (basal cell carcinoma) and non-melanoma skin cancer (squamous cell carcinoma). While some cancer registries report non-melanoma skin cancer at the four- or five- digit level required to distinguish between the subtypes (eg, “C44.01” versus “C44.02”, “173.01” versus “173.02”), most registries report these cancers at the three-digit level as “C44” or “173” (“Other and unspecified malignant neoplasm of skin”). Because of this, those incident cases that were reported at this three-digit level were split to

“basal cell carcinoma” and “squamous cell carcinoma” based on proportions reported by Karagas et al during the cause disaggregation step (step #5 in the flowchart).<sup>12</sup> Since mortality estimates are produced for squamous cell carcinoma under the assumption that basal cell carcinoma causes almost no deaths, all mortalities reported as “C44” or “173” were mapped to the “squamous cell carcinoma” GBD cause. Apart from this additional step for some incident cases, the remainder of the cancer registry processing was the same as for other cancers as described above.

#### *Steps of analysis and data transformation processes*

Non-melanoma skin cancer (squamous cell carcinoma) mortality estimation followed the same steps as the other cancers (see flowchart and description above) except for step #5 in the flowchart as described above.

#### *Model selection*

The modelling strategy for non-melanoma skin cancer (squamous cell carcinoma) followed the general CODEm process.

#### *Model performance and sensitivity*

The modelling performance and sensitivity for non-melanoma skin cancer (squamous cell carcinoma) mirrored that of the general CODEm process.

#### *Uncertainty intervals*

Uncertainty was determined using standard CODEm methodology.

## Results

#### *Interpretation of results*

Non-melanoma skin cancer mortality estimates are not available from other sources. GLOBOCAN, for example, does not report deaths due to non-melanoma skin cancer. Even though the data availability for non-melanoma skin cancer is poor, the fact that it is the most common incident cancer with rates expected to rise makes it a necessity to include the disease in the GBD framework.

#### *Limitations*

Cancer registry data for non-melanoma skin cancer incidence have to be interpreted with caution due to a substantial amount of underreporting or rules that only the first non-melanoma skin cancer has to be registered. Many cancer registries therefore do not include non-melanoma skin cancers at all. For vital registration data we make the assumption that there are no deaths due to non-melanoma skin cancer (basal cell carcinoma), therefore all deaths attributed to basal cell carcinoma were included instead as squamous cell carcinoma.

## References

- 1 Waterhouse J, Muir C, Shanmugaratnam K, Powell J. Cancer Incidence in Five Continents IV. Lyon: IARC, 1982.
- 2 Curado M, Edwards B, Shin H, *et al.* Cancer Incidence in Five Continents IX. Lyon: IARC, 2007 <http://www.iarc.fr/en/publications/pdfs-online/epi/sp160/CI5vol9-A.pdf>.
- 3 Muir C, Mack T, Powell J, Whelan S. Cancer Incidence in Five Continents V. Lyon: IARC, 1987.
- 4 Parkin D, Muir C, Whelan S, Gao Y, Ferlay J, Powell J. Cancer Incidence in Five Continents VI. Lyon: IARC, 1992.
- 5 Parkin D, Whelan S, Ferlay J, Raymond L, Young J. Cancer Incidence in Five Continents VII. Lyon: IARC, 1997.
- 6 Parkin D, Whelan S, Ferlay J, Teppo L, Thomas D. Cancer Incidence in Five Continents VIII. Lyon: IARC, 2002.
- 7 Forman D, Bray F, Brewster D, *et al.* Cancer Incidence in Five Continents X. 2013. <http://ci5.iarc.fr>.
- 8 Engholm G, Ferlay J, Christensen N, *et al.* NORDCAN: Cancer Incidence, Mortality, Prevalence and Survival in the Nordic Countries, Version 7.3 Association of the Nordic Cancer Registries. Danish Cancer Society. 2016; published online Aug 7. <http://www.anocr.nu>.
- 9 Steliarova-Foucher E, O'Callaghan M, Ferlay J, Masuyer E, Forman D, Comber H, Bray F. European Cancer Observatory: Cancer Incidence, Mortality, Prevalence and Survival in Europe. Version 1.0 European Network of Cancer Registries, International Agency for Research on Cancer. 2012; published online Sept. <http://eco.iarc.fr>.
- 10 GBD 2015 Risk Factors Collaborators. Global, regional, and national comparative risk assessment of 79 behavioural, environmental and occupational, and metabolic risks or clusters of risks, 1990–2015: a systematic analysis for the Global Burden of Disease Study 2015. *The Lancet* 2016; **388**: 1659–724.
- 11 International Agency for Research on Cancer, World Health Organization. GLOBOCAN estimated cancer incidence, mortality, and prevalence worldwide in 2012. Lyon, France: IARC, 2014 <http://globocan.iarc.fr/Default.aspx> (accessed April 19, 2016).
- 12 Karagas MR, Greenberg ER, Spencer SK, Stukel TA, Mott LA. Increase in incidence rates of basal cell and squamous cell skin cancer in New Hampshire, USA. New Hampshire Skin Cancer Study Group. *Int J Cancer* 1999; **81**: 555–9.

## Cardiovascular Diseases

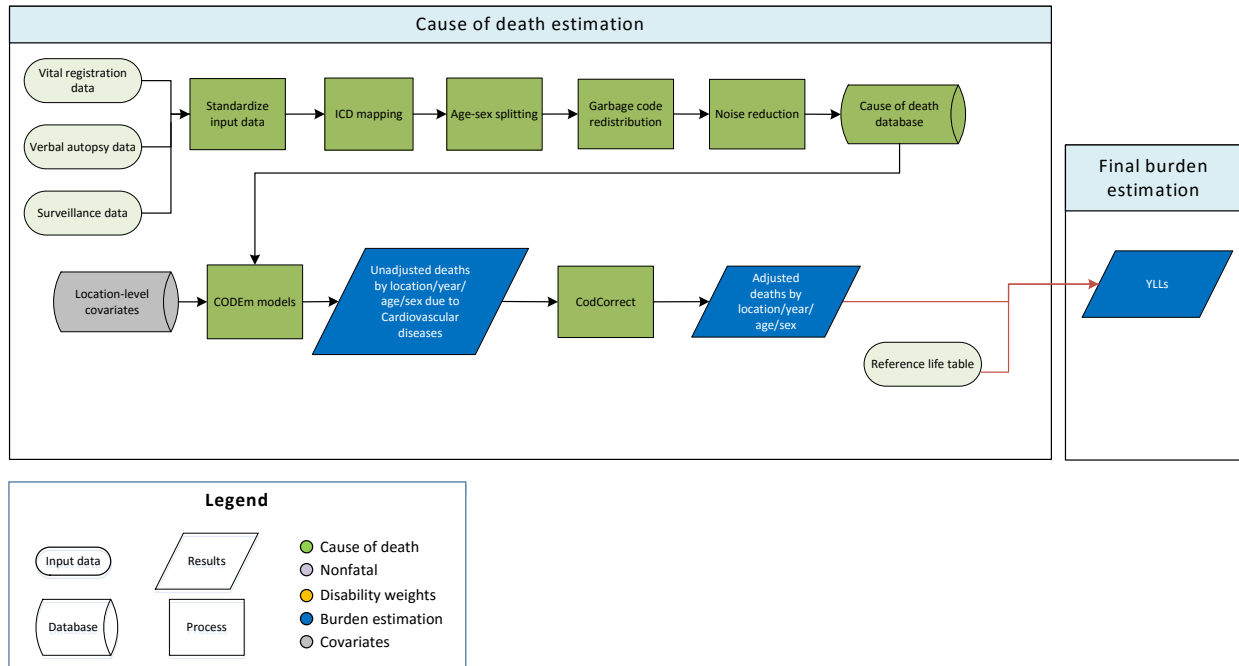

### Input data

Vital registration, verbal autopsy, and surveillance data were used to model this cause. We outliered non-representative subnational verbal autopsies from a number of Indian states. We also outliered verbal autopsy data sources that were implausibly low in all age groups and ICD8 and ICD9 BTL data points that were inconsistent with the rest of the data and created implausible time trends.

### Modelling strategy

We used a standard CODEm approach to model deaths from cardiovascular diseases. We have updated the covariates included in the ensemble modelling process (see Table). Otherwise, there have been no substantive changes from the approach used in GBD 2015.

**Table: Selected covariates for CODEm models, cardiovascular diseases**

| Covariate                               | Transformation | Level | Direction |
|-----------------------------------------|----------------|-------|-----------|
| Summary exposure variable               | None           | 1     | 1         |
| Cholesterol (total, mean per capita)    | None           | 1     | 1         |
| Smoking prevalence                      | None           | 1     | 1         |
| Systolic blood pressure (mmHg)          | None           | 1     | 1         |
| Trans fatty acid                        | None           | 1     | 1         |
| Mean BMI                                | None           | 2     | 1         |
| Elevation over 1500m (proportion)       | None           | 2     | -1        |
| Fasting plasma glucose (mmol/L)         | None           | 2     | 1         |
| Outdoor pollution (PM <sub>2.5</sub> )  | None           | 2     | 1         |
| Indoor air pollution (all fuel types)   | None           | 2     | 1         |
| Healthcare access and quality index     | None           | 2     | -1        |
| Lag distributed income per capita (I\$) | Log            | 3     | -1        |
| Socio-demographic Index                 | None           | 3     | 0         |
| Omega-3 (kcal/capita, adjusted)         | Log            | 3     | -1        |
| Fruits (kcal/capita, adjusted)          | None           | 3     | -1        |
| Vegetables (kcal/capita, adjusted)      | None           | 3     | -1        |
| Nuts and seeds (kcal/capita, adjusted)  | None           | 3     | -1        |
| Whole grains (kcal/capita, adjusted)    | None           | 3     | -1        |
| Pulses/legumes (kcal/capita, adjusted)  | None           | 3     | -1        |
| PUFA adjusted (percent)                 | None           | 3     | -1        |
| Alcohol (litres per capita)             | None           | 3     | 0         |

## Rheumatic Heart Disease

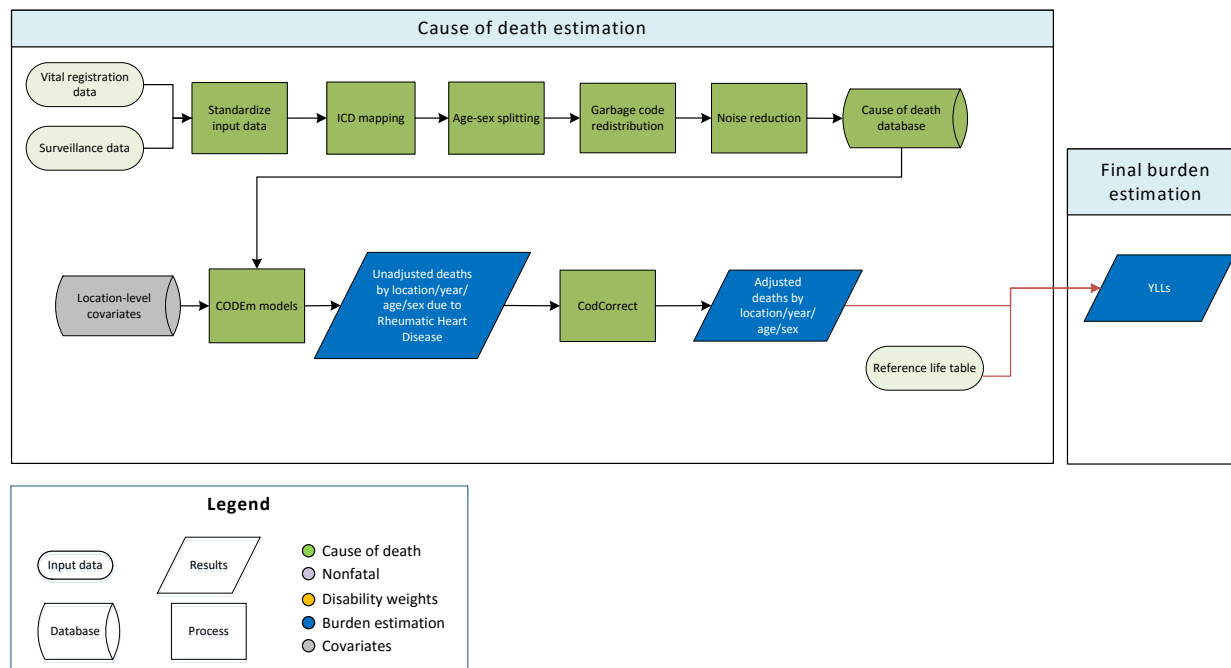

### Input data

Vital registration and surveillance data were used to model rheumatic heart disease. We outliered ICD8 and ICD9 BTL data points which were inconsistent with the rest of the data and created implausible time trends. We also outliered data points which were too high after the redistribution process in a number of age groups.

### Modelling strategy

We used a standard CODEm approach to model deaths from rheumatic heart disease. We have updated the covariates included in the ensemble modelling process (see Table). Otherwise, there have been no substantive changes from the approach used in GBD 2015.

**Table: Selected covariates for CODEm models, rheumatic heart disease**

| Covariate                           | Transformation | Level | Direction |
|-------------------------------------|----------------|-------|-----------|
| SEV                                 | None           | 1     | 1         |
| Improved water (proportion)         | None           | 1     | -1        |
| Malnutrition                        | None           | 1     | 1         |
| Sanitation (proportion with access) | None           | 1     | -1        |
| Healthcare access and quality index | None           | 2     | -1        |
| LDI                                 | Log            | 3     | -1        |
| SDI                                 | None           | 3     | -1        |
| Education (years per capita)        | None           | 3     | -1        |

## Ischemic Heart Disease

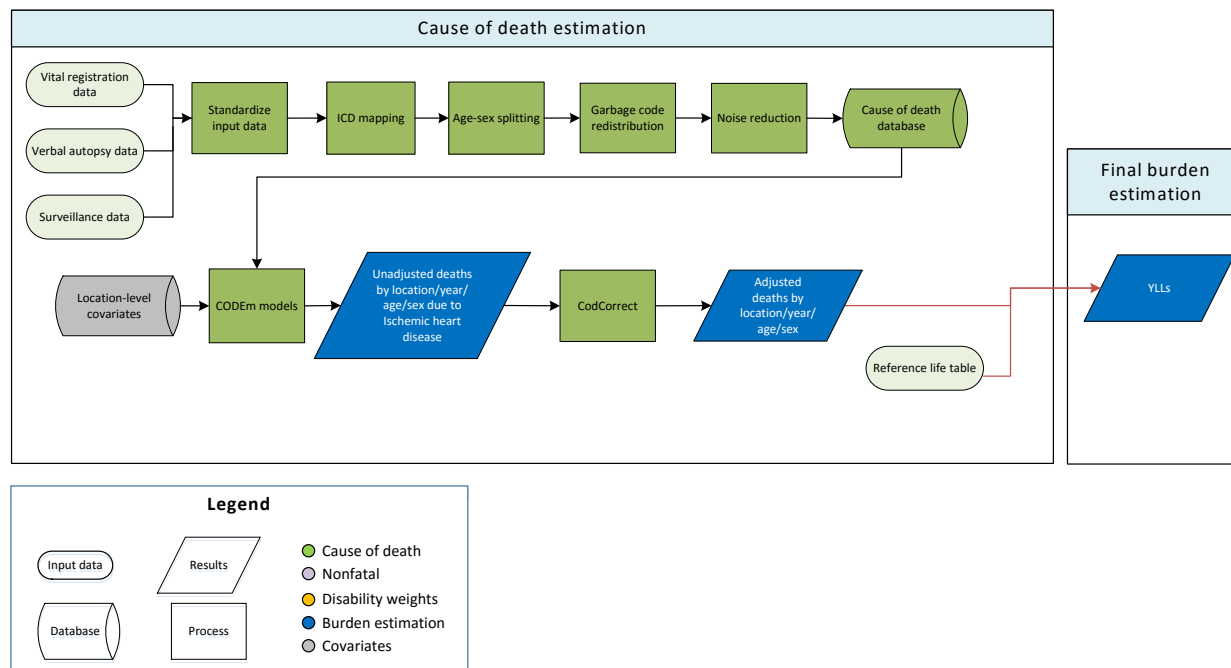

### Input data

Vital registration, verbal autopsy, and surveillance data were used to model ischemic heart disease. We outliered verbal autopsy data in countries and subnational locations where high-quality vital registration data were also available. We also outliered non-representative subnational verbal autopsy data points, ICD8 and ICD9 BTL data points which were inconsistent with the rest of the data and created implausible time trends, and data in a number of Indian states identified by experts as poor-quality.

### Modelling strategy

We used a standard CODEm approach to model deaths from ischemic heart disease. We have updated the covariates included in the ensemble modelling process (see Table). Otherwise, there have been no substantive changes from the approach used in GBD 2015.



**Table: Selected covariates for CODEm models, ischemic heart disease**

| Covariate                               | Transformation | Level | Direction |
|-----------------------------------------|----------------|-------|-----------|
| Summary exposure variable               | None           | 1     | 1         |
| Cholesterol (total, mean per capita)    | None           | 1     | 1         |
| Smoking prevalence                      | None           | 1     | 1         |
| Systolic blood pressure (mmHg)          | None           | 1     | 1         |
| Trans fatty acid                        | None           | 1     | 1         |
| Mean BMI                                | None           | 2     | 1         |
| Elevation over 1500m (proportion)       | None           | 2     | -1        |
| Fasting plasma glucose                  | None           | 2     | 1         |
| Outdoor pollution (PM <sub>2.5</sub> )  | None           | 2     | 1         |
| Indoor air pollution                    | None           | 2     | 1         |
| Healthcare access and quality index     | None           | 2     | -1        |
| Lag distributed income per capita (I\$) | Log            | 3     | -1        |
| Socio-demographic Index                 | None           | 3     | 0         |
| Omega-3 (kcal/capita, adjusted)         | Log            | 3     | -1        |
| Fruits (kcal/capita, adjusted)          | None           | 3     | -1        |
| Vegetables (kcal/capita, adjusted)      | None           | 3     | -1        |
| Nuts and seeds (kcal/capita, adjusted)  | None           | 3     | -1        |
| Whole grains (kcal/capita, adjusted)    | None           | 3     | -1        |
| Pulses/legumes (kcal/capita, adjusted)  | None           | 3     | -1        |
| PUFA adjusted (percent)                 | None           | 3     | -1        |
| Alcohol (litres per capita)             | None           | 3     | 0         |

## Cerebrovascular Disease

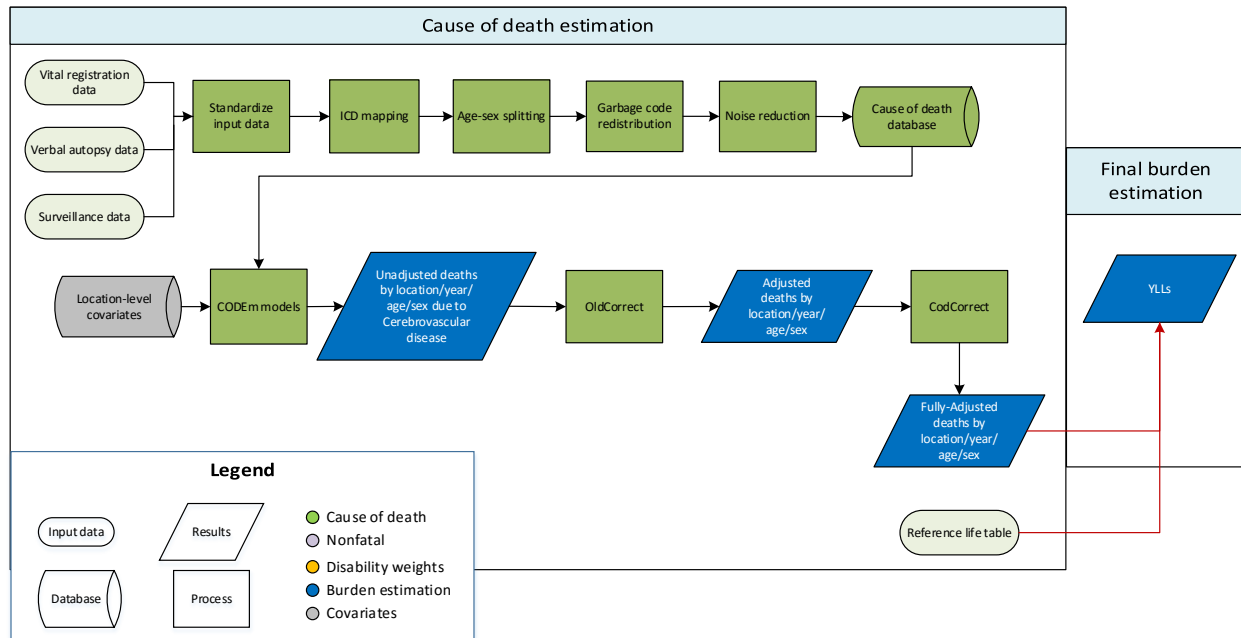

### Input data

Verbal autopsy and vital registration data were used to model cerebrovascular disease. We outliered non-representative subnational verbal autopsy data points. We reassigned deaths from verbal autopsy reports for cerebrovascular disease to the parent cardiovascular disease for both sexes for those under 20 years of age. We also outliered ICD8, ICD9 BTL, and ICD10 Tabulated data points which were inconsistent with the rest of the data and created implausible time trends. Data points from sources which were implausibly low in all age groups and data points that were causing the regional estimates to be improbably high were outliered.

### Modelling strategy

We used a standard CODEm approach to model deaths from cerebrovascular disease. The most significant update to the cerebrovascular method was the addition of a correction for miscoding of Alzheimer and other dementias and Parkinson disease to the post-CODEm adjustments to generate corrected cause-specific death estimates for final burden estimation. We have also updated the covariates included in the ensemble modelling process (see Table). Otherwise, there have been no substantive changes from the approach used in GBD 2015.

**Table: Selected covariates for CODEm models, cerebrovascular disease**

| Covariate                               | Transformation | Level | Direction |
|-----------------------------------------|----------------|-------|-----------|
| Summary exposure variable               | None           | 1     | 1         |
| Cholesterol (total, mean per capita)    | None           | 1     | 1         |
| Smoking prevalence                      | None           | 1     | 1         |
| Systolic blood pressure (mmHg)          | None           | 1     | 1         |
| Trans fatty acid                        | None           | 1     | 1         |
| Mean BMI                                | None           | 2     | 1         |
| Elevation over 1500m (proportion)       | None           | 2     | -1        |
| Fasting plasma glucose                  | None           | 2     | 1         |
| Outdoor pollution (PM <sub>2.5</sub> )  | None           | 2     | 1         |
| Indoor air pollution                    | None           | 2     | 1         |
| Healthcare access and quality index     | None           | 2     | -1        |
| Lag distributed income per capita (I\$) | Log            | 3     | -1        |
| Socio-demographic Index                 | None           | 3     | 0         |
| Omega-3 (kcal/capita, adjusted)         | Log            | 3     | -1        |
| Fruits (kcal/capita, adjusted)          | None           | 3     | -1        |
| Vegetables (kcal/capita, adjusted)      | None           | 3     | -1        |
| Nuts and seeds (kcal/capita, adjusted)  | None           | 3     | -1        |
| Whole grains (kcal/capita, adjusted)    | None           | 3     | -1        |
| Pulses/legumes (kcal/capita, adjusted)  | None           | 3     | -1        |
| PUFA adjusted (percent)                 | None           | 3     | -1        |
| Alcohol (litres per capita)             | None           | 3     | 0         |

## Ischemic Stroke

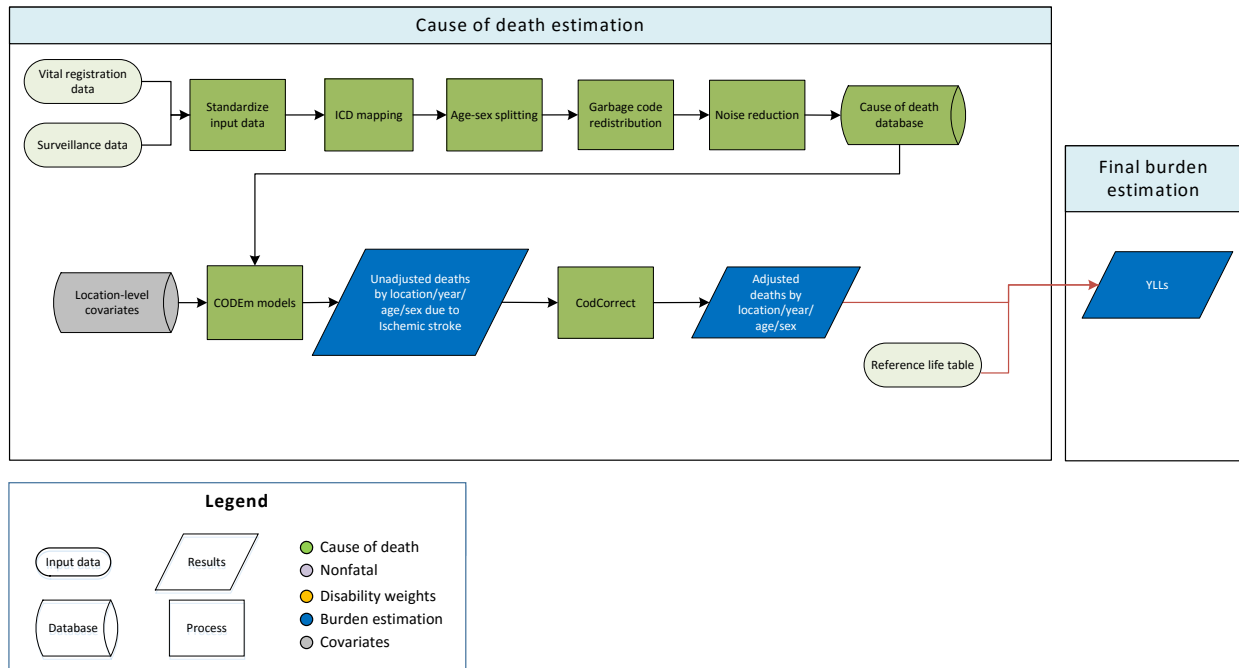

### Input data

Vital registration and surveillance data were used to model ischemic stroke. We reassigned deaths from verbal autopsy reports for ischemic stroke to the parent cardiovascular disease for both sexes for those under 20 years of age. We outliered ICD8 data points which were inconsistent with the rest of the data and created implausible time trends.

### Modelling strategy

We used a standard CODEm approach to model deaths from ischemic stroke. In locations with limited data on ischemic stroke, the subtype-specific deaths were estimated by squeezing both ischemic and hemorrhagic stroke to the overall cerebrovascular envelope. We have updated the covariates included in the ensemble modelling process (see Table). Otherwise, there have been no substantive changes from the approach used in GBD 2015.

**Table: Selected covariates for CODEm models, ischemic stroke**

| Covariate                               | Transformation | Level | Direction |
|-----------------------------------------|----------------|-------|-----------|
| Summary exposure variable               | None           | 1     | 1         |
| Cholesterol (total, mean per capita)    | None           | 1     | 1         |
| Smoking prevalence                      | None           | 1     | 1         |
| Systolic blood pressure (mmHg)          | None           | 1     | 1         |
| Trans fatty acid                        | None           | 1     | 1         |
| Mean BMI                                | None           | 2     | 1         |
| Elevation over 1500m (proportion)       | None           | 2     | -1        |
| Fasting plasma glucose                  | None           | 2     | 1         |
| Outdoor pollution (PM <sub>2.5</sub> )  | None           | 2     | 1         |
| Indoor air pollution                    | None           | 2     | 1         |
| Healthcare access and quality index     | None           | 2     | -1        |
| Lag distributed income per capita (I\$) | Log            | 3     | -1        |
| Socio-demographic Index                 | None           | 3     | 0         |
| Omega-3 (kcal/capita, adjusted)         | Log            | 3     | -1        |
| Fruits (kcal/capita, adjusted)          | None           | 3     | -1        |
| Vegetables (kcal/capita, adjusted)      | None           | 3     | -1        |
| Nuts and seeds (kcal/capita, adjusted)  | None           | 3     | -1        |
| Whole grains (kcal/capita, adjusted)    | None           | 3     | -1        |
| Pulses/legumes (kcal/capita, adjusted)  | None           | 3     | -1        |
| PUFA adjusted (percent)                 | None           | 3     | -1        |
| Alcohol (litres per capita)             | None           | 3     | 0         |

## Hemorrhagic Stroke

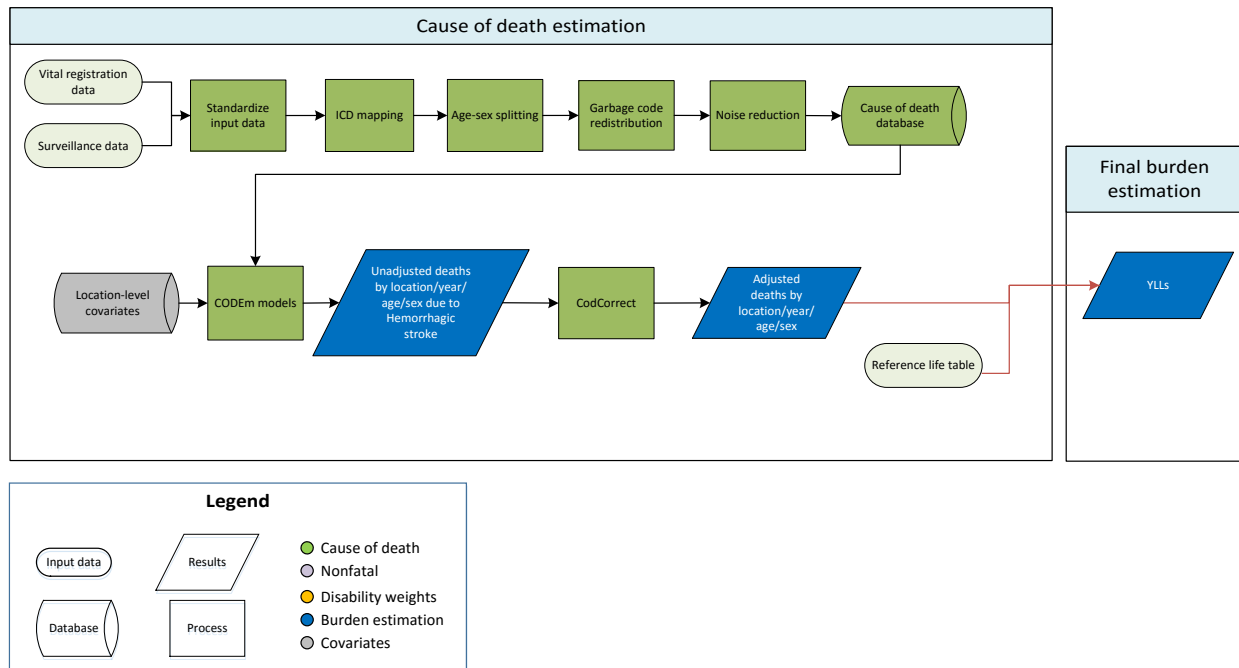

### Input data

Vital registration and surveillance data were used to model hemorrhagic stroke. We reassigned deaths from verbal autopsy reports for hemorrhagic stroke to the parent cardiovascular disease for both sexes for those under 20 years of age. We outliered ICD8 data points which were inconsistent with the rest of the data and created implausible time trends.

### Modelling strategy

We used a standard CODEm approach to model deaths from hemorrhagic stroke. In locations with limited data on hemorrhagic stroke, the subtype-specific deaths were estimated by squeezing both ischemic and hemorrhagic stroke to the overall cerebrovascular envelope. We have updated the covariates included in the ensemble modelling process (see Table). Otherwise, there have been no substantive changes from the approach used in GBD 2015.

**Table: Selected covariates for CODEm models, hemorrhagic stroke**

| Covariate                               | Transformation | Level | Direction |
|-----------------------------------------|----------------|-------|-----------|
| Summary exposure variable               | None           | 1     | 1         |
| Cholesterol (total, mean per capita)    | None           | 1     | 0         |
| Smoking prevalence                      | None           | 1     | 1         |
| Systolic blood pressure (mmHg)          | None           | 1     | 1         |
| Trans fatty acid                        | None           | 1     | 1         |
| Mean BMI                                | None           | 2     | 1         |
| Elevation over 1500m (proportion)       | None           | 2     | -1        |
| Fasting plasma glucose                  | None           | 2     | 1         |
| Outdoor pollution (PM <sub>2.5</sub> )  | None           | 2     | 1         |
| Indoor air pollution                    | None           | 2     | 1         |
| Healthcare access and quality index     | None           | 2     | -1        |
| Lag distributed income per capita (I\$) | Log            | 3     | -1        |
| Socio-demographic index                 | None           | 3     | 0         |
| Omega-3 (kcal/capita, adjusted)         | Log            | 3     | -1        |
| Fruits (kcal/capita, adjusted)          | None           | 3     | -1        |
| Vegetables (kcal/capita, adjusted)      | None           | 3     | -1        |
| Nuts and seeds (kcal/capita, adjusted)  | None           | 3     | -1        |
| Whole grains (kcal/capita, adjusted)    | None           | 3     | -1        |
| Pulses/legumes (kcal/capita, adjusted)  | None           | 3     | -1        |
| PUFA adjusted (percent)                 | None           | 3     | -1        |
| Alcohol (litres per capita)             | None           | 3     | 0         |

## Hypertensive Heart Disease

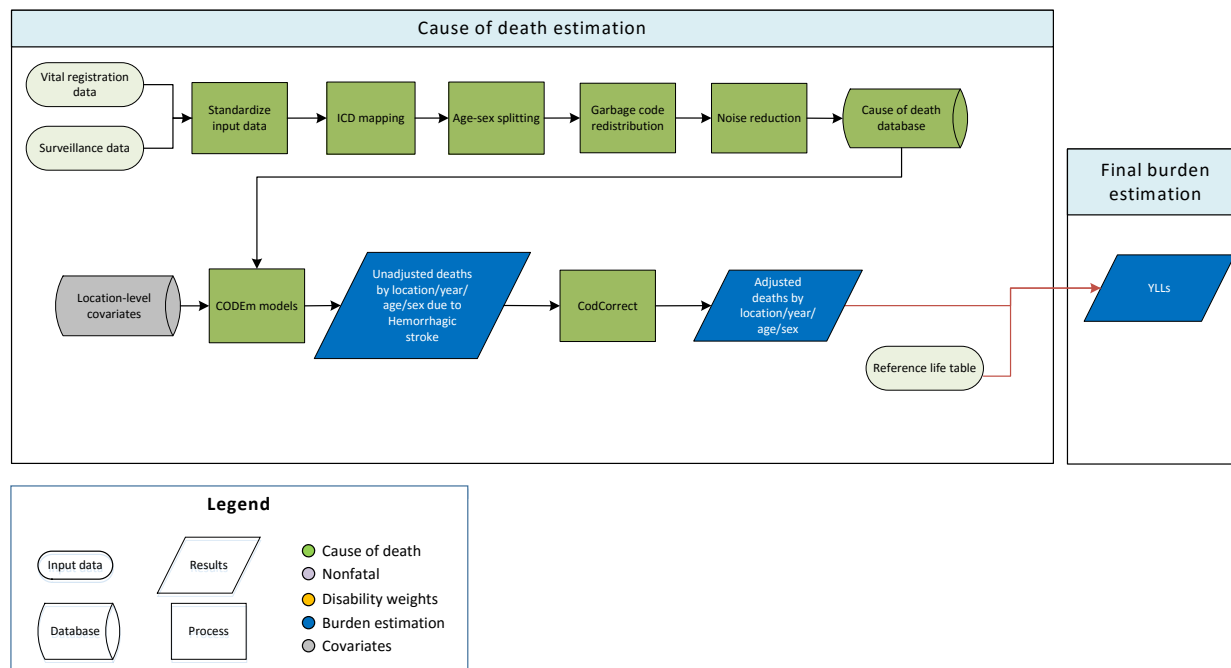

### Input data

Vital registration and surveillance data were used to model hypertensive heart disease. We outliered ICD9 BTL data points, which were inconsistent with the rest of the data and created implausible time trends.

### Modelling strategy

We used a standard CODEm approach to model deaths from cardiovascular diseases. We have updated the covariates included in the ensemble modelling process (see Table). Otherwise, there have been no substantive changes from the approach used in GBD 2015.

**Table: Selected covariates for CODEm models, hypertensive heart disease**

| Covariate                               | Transformation | Level | Direction |
|-----------------------------------------|----------------|-------|-----------|
| Cholesterol (total, mean per capita)    | None           | 1     | 1         |
| Smoking prevalence                      | None           | 1     | 1         |
| Systolic blood pressure (mmHg)          | None           | 1     | 1         |
| Mean BMI                                | None           | 2     | 1         |
| Healthcare access and quality index     | None           | 2     | -1        |
| Lag distributed income per capita (I\$) | Log            | 3     | -1        |
| Socio-demographic index                 | None           | 3     | 0         |



## Myocarditis

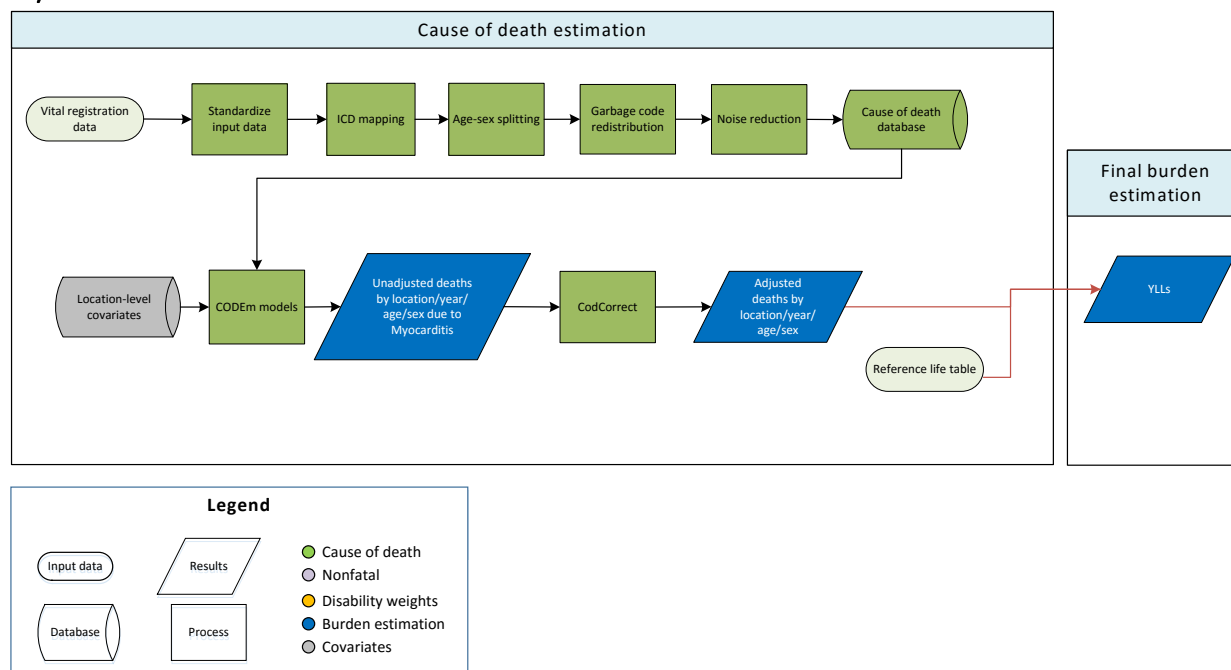

### Input data

Vital registration data were used to model deaths due to myocarditis.

### Modelling strategy

We used a standard CODEm approach to model deaths from myocarditis. This is one of three new sub-causes under the cardiomyopathy and myocarditis parent cause for GBD 2016. The covariates selected for inclusion in the CODEm modelling process can be found in the table below.

**Table: Selected covariates for CODEm models, myocarditis**

| Covariate                               | Transformation | Level | Direction |
|-----------------------------------------|----------------|-------|-----------|
| Summary exposure variable, CMP          | none           | 1     | 1         |
| Systolic blood pressure (mm Hg)         | none           | 1     | 1         |
| Healthcare access and quality index     | none           | 2     | -1        |
| Lag distributed income per capita (I\$) | log            | 3     | 0         |
| Socio-demographic Index                 | none           | 3     | 0         |

## Alcoholic Cardiomyopathy

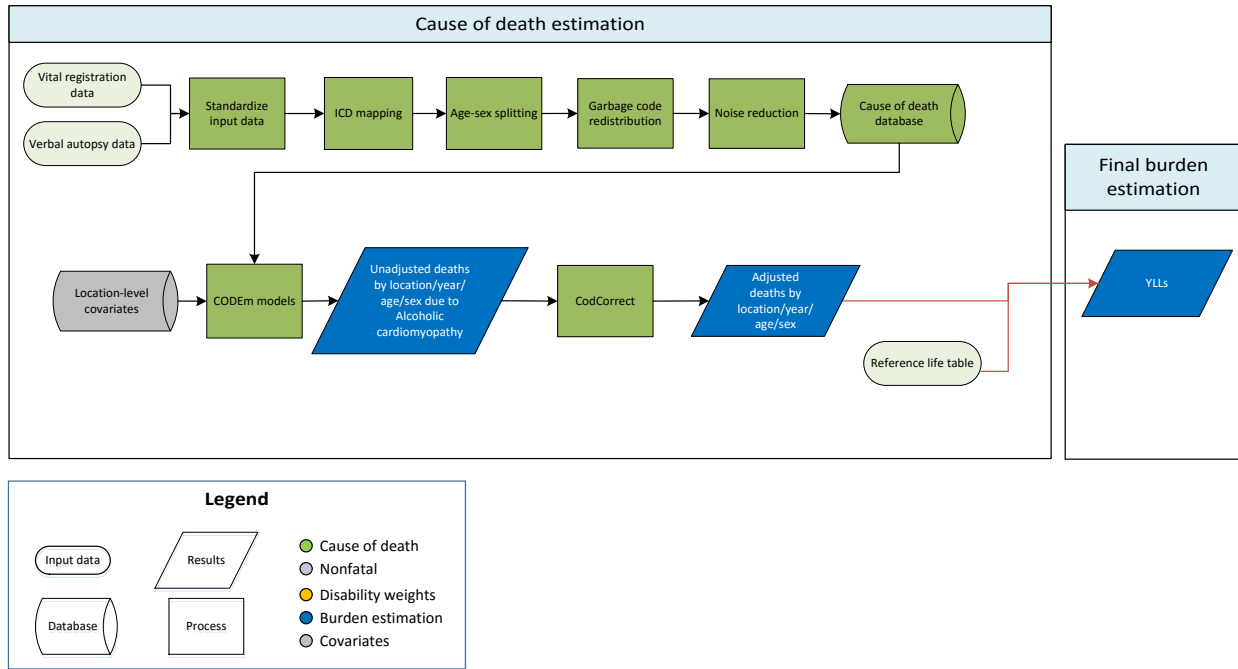

### Input data

Vital registration and verbal autopsy data were used to model deaths due to alcoholic cardiomyopathy. We outliered ICD9 data points in Cyprus that were implausibly high and discontinuous with the rest of the time series.

### Modelling strategy

We used a standard CODEm approach to model deaths from alcoholic cardiomyopathy. This is one of three new sub-causes under the cardiomyopathy and myocarditis parent cause for GBD 2016. The covariates selected for inclusion in the CODEm modelling process can be found in the table below. As local differences in coding practices may explain some of the geographic variation that we see for deaths due to cardiomyopathy and myocarditis, we plan to explore how this issue may affect the alcoholic cardiomyopathy sub-cause further in future iterations of GBD.

**Table: Selected covariates for CODEm models, alcoholic cardiomyopathy**

| Covariate                               | Transformation | Level | Direction |
|-----------------------------------------|----------------|-------|-----------|
| Summary exposure variable, CMP          | none           | 1     | 1         |
| Smoking prevalence                      | none           | 1     | 1         |
| Alcohol (litres per capita)             | none           | 1     | 1         |
| Healthcare access and quality index     | none           | 2     | -1        |
| Lag distributed income per capita (I\$) | log            | 3     | 0         |
| Socio-demographic Index                 | none           | 3     | 0         |

## Other cardiomyopathy

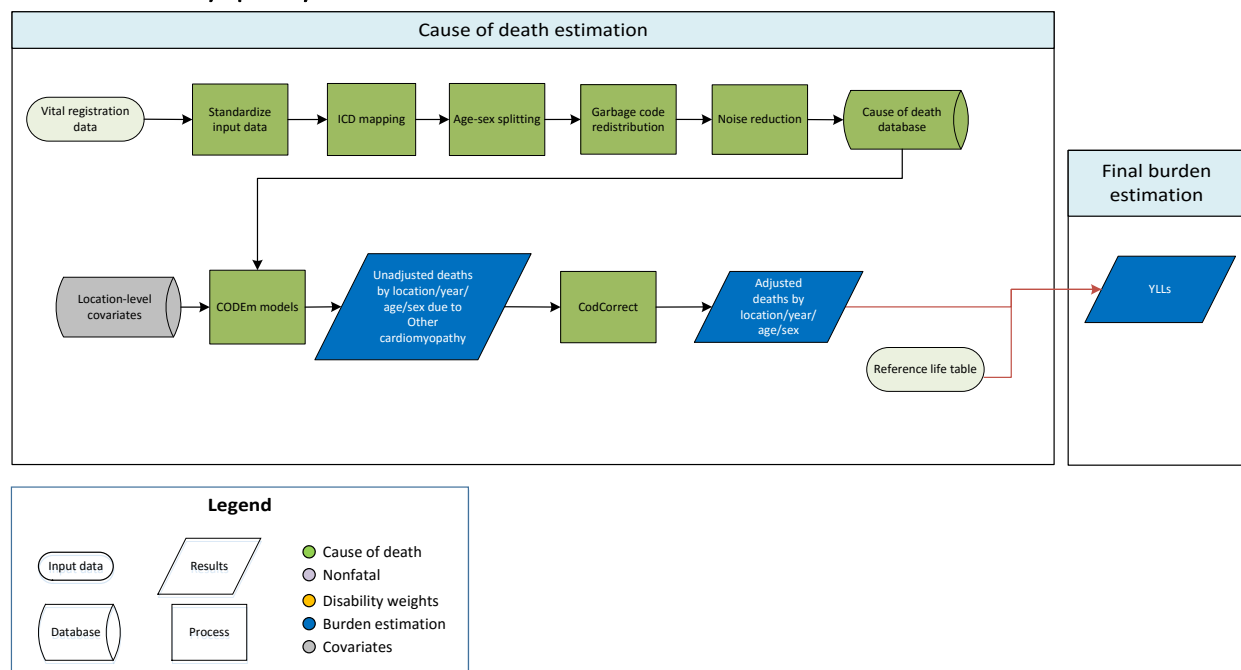

### Input data

Vital registration data were used to model deaths due to other cardiomyopathy. We outliered data points in Central Asia and Central and Eastern Europe due to implausibly high values which we attributed to variation in local coding practices after review with experts.

### Modelling strategy

We used a standard CODEm approach to model deaths from other cardiomyopathy. This is one of three new sub-causes under the cardiomyopathy and myocarditis parent cause for GBD 2016. The covariates selected for inclusion in the CODEm modelling process can be found in the table below. As local differences in coding practices may explain some of the geographic variation that we see for deaths due to cardiomyopathy and myocarditis, we plan to explore how this issue may affect the other cardiomyopathy sub-cause further in future iterations of GBD.

**Table: Selected covariates for CODEm models, other cardiomyopathy**

| Covariate                               | Transformation | Level | Direction |
|-----------------------------------------|----------------|-------|-----------|
| Summary exposure variable, CMP          | none           | 1     | 1         |
| Systolic blood pressure (mmHg)          | none           | 1     | 1         |
| Smoking prevalence                      | none           | 1     | 1         |
| Body mass index (kg/m <sup>2</sup> )    | none           | 2     | 1         |
| Healthcare access and quality index     | none           | 2     | -1        |
| Lag distributed income per capita (I\$) | log            | 3     | 0         |
| Socio-demographic Index                 | none           | 3     | 0         |

# Atrial Fibrillation and Flutter

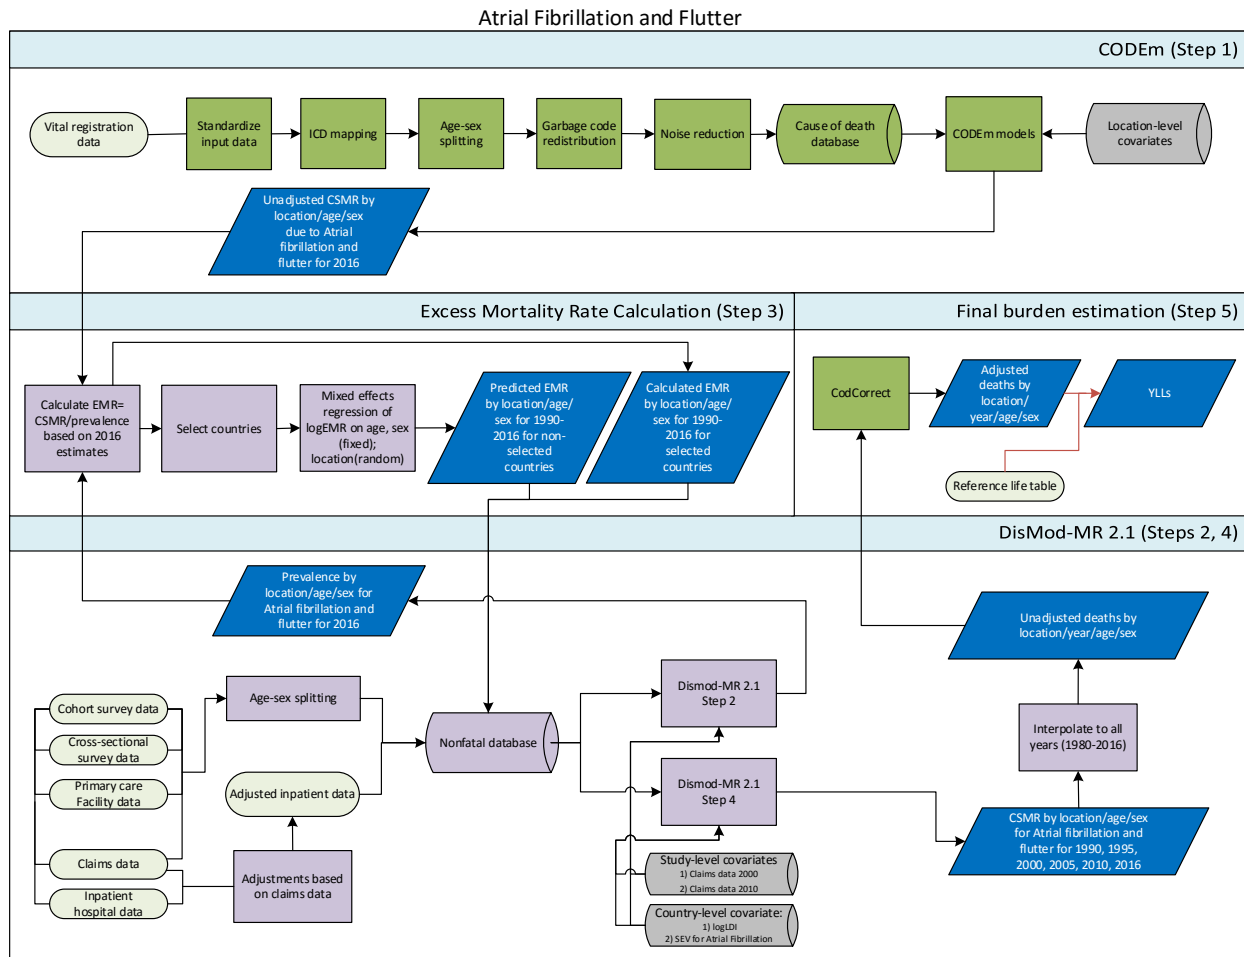

## Input data

Vital registration data: We outliered ICD8 and ICD9 data points that were discontinuous from other data in the time series and created an unlikely time trend. We also outliered data points that were implausibly low in multiple age groups.

## Modelling strategy

In order to address changes in coding practices for atrial fibrillation, we used an integrated approach that combined DisMod-MR and CODEm models to estimate deaths from atrial fibrillation and flutter. This approach allowed us to adjust estimates to more accurately reflect the number of deaths for which atrial fibrillation was the true underlying cause of death.

The modelling steps are illustrated in the above flowchart. Covariates included in both the DisMod-MR 2.1 and CODEm models can be found in the table below. In Step 1, we estimated deaths for atrial fibrillation using a standard CODEm approach. In Step 2, we estimated prevalence rates in DisMod-MR 2.1 using data from published reports of cross-sectional and cohort surveys, as well as primary care facility data. We also used claims data covering inpatient and outpatient visits for the United States

along with inpatient hospital data from 163 locations in 15 countries. For GBD 2016, inpatient hospital data were adjusted using age- and sex-specific information from US claims data for: 1) readmission within one year; 2) primary diagnosis code to secondary codes; and, 3) the ratio of inpatient to outpatient visits. We set priors of no remission and no excess mortality prior to age 30.

In Step 3, we calculated the excess mortality rate (EMR) for 2016 (defined as the cause-specific mortality rate (CSMR) estimated from CODEm divided by the prevalence rate from DisMod-MR 2.1). We then selected 17 countries based on four conditions: 1) ranking of 4 or 5 stars on the newly developed system for assessing the quality of VR data; 2) prevalence data available from the literature was included in the DisMod-MR 2.1 estimation; 3) prevalence rate  $\geq 0.005$ ; and, 4) CSMR  $\geq 0.00002$ . Using information from these countries as input data, we ran a linear mixed-effects regression of logEMR on sex, age, and location. Sex and age were treated as fixed effects for the regression, while location was considered a random effect. We then predicted age- and sex-specific EMR using the results of this regression for all non-selected countries. Countries included in the regression were assigned their directly calculated values. These EMR data points were assigned to the time period 1990–2016 and uploaded into the nonfatal database in order to be used in modelling.

In Step 4, we reran DisMod-MR 2.1 including the EMR estimated in Step 3 as input data using the same priors as in Step 2. The CSMR from the DisMod-MR model in Step 4 was used as the finalized output. As DisMod-MR 2.1 only generates estimates for six years (1990, 1995, 2000, 2005, 2010, 2016), we interpolated the missing years to generate death estimates for all years (1980–2016). These results were then uploaded into the Cause of Death database. Finally, in Step 5, the unadjusted death estimates were run through the CoDCorrect process to generate adjusted deaths, and YLLs were generated by the DALYnator using a standard reference life table.

CODEm Covariates

| Covariate                               | Transformation | Level | Direction |
|-----------------------------------------|----------------|-------|-----------|
| Summary exposure variable               | None           | 1     | 1         |
| Cholesterol (total, mean per capita)    | None           | 1     | 1         |
| Smoking prevalence                      | None           | 1     | 1         |
| Systolic blood pressure (mmHg)          | None           | 1     | 1         |
| Mean BMI                                | None           | 2     | 1         |
| Elevation over 1500m (proportion)       | None           | 2     | -1        |
| Fasting plasma glucose                  | None           | 2     | 1         |
| Outdoor pollution (PM <sub>2.5</sub> )  | None           | 2     | 1         |
| Indoor air pollution                    | None           | 2     | 1         |
| Healthcare Access and Quality Index     | None           | 2     | -1        |
| Lag distributed income per capita (I\$) | Log            | 3     | -1        |
| Socio-demographic Index                 | None           | 3     | 0         |
| Omega-3 (kcal/capita, adjusted)         | Log            | 3     | -1        |
| Fruits (kcal/capita, adjusted)          | None           | 3     | -1        |
| Vegetables (kcal/capita, adjusted)      | None           | 3     | -1        |
| Nuts and seeds (kcal/capita, adjusted)  | None           | 3     | -1        |
| Whole grains (kcal/capita, adjusted)    | None           | 3     | -1        |
| Pulses/legumes (kcal/capita, adjusted)  | None           | 3     | -1        |
| PUFA adjusted (percent)                 | None           | 3     | -1        |
| Alcohol (litres per capita)             | None           | 3     | 0         |
| Trans fatty acid                        | None           | 1     | 1         |

DisMod Covariates – Step 2

| Study covariate                                | Parameter             | Beta                      | Exponentiated beta |
|------------------------------------------------|-----------------------|---------------------------|--------------------|
| Hospital data                                  | Prevalence            | -0.000086 (-0.19 – 0.097) | 1.0 (0.82 – 1.10)  |
| All MarketScan, year 2000                      | Prevalence            | -0.47 (-0.5 – -0.44)      | 0.63 (0.61 – 0.64) |
| All MarketScan, year 2010                      | Prevalence            | -0.003 (-0.024 – -0.014)  | 1.0 (0.98 – 1.01)  |
| Log-transformed age-standardized SEV scalar: A | Prevalence            | 0.75 (0.75 – 0.75)        | 2.12 (2.12 – 2.12) |
| Fib                                            |                       |                           |                    |
| LDI (I\$ per capita)                           | Excess mortality rate | -0.48 (-0.5 – -0.43)      | 0.62 (0.61 – 0.65) |

DisMod Covariates – Step 4

| Study covariate                                | Parameter             | Beta                      | Exponentiated beta |
|------------------------------------------------|-----------------------|---------------------------|--------------------|
| All MarketScan, year 2000                      | Prevalence            | -0.46 (-0.49 – -0.43)     | 0.63 (0.62 – 0.65) |
| All MarketScan, year 2010                      | Prevalence            | -0.0021 (-0.025 – -0.021) | 1.0 (0.98 – 1.02)  |
| Log-transformed age-standardized SEV scalar: A | Prevalence            | 0.75 (0.75 – 0.75)        | 2.12 (2.12 – 2.12) |
| Fib                                            |                       |                           |                    |
| LDI (I\$ per capita)                           | Excess mortality rate | -0.1 (-0.1 – -0.1)        | 0.9 (0.9 – 0.9)    |

## Aortic Aneurysm

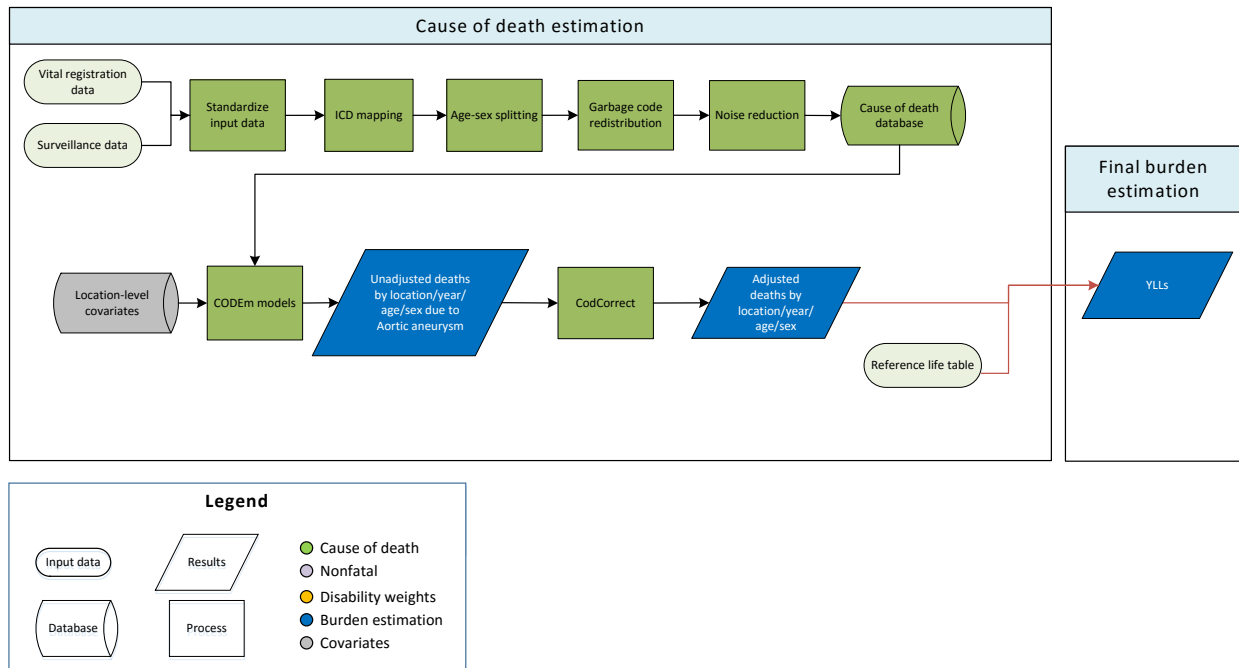

### Input data

Vital registration and surveillance data were used to model this cause. We outliered data in Oman as they were improbably high in comparison with the rest of the region. We also outliered ICD8 data that were discontinuous with the rest of the time series and created implausible time trends.

### Modelling strategy

We used a standard CODEm approach to model deaths from cardiovascular diseases. We have updated the covariates included in the ensemble modelling process (see Table). Otherwise, there have been no substantive changes from the approach used in GBD 2015.

**Table: Selected covariates for CODEm models, cardiovascular diseases**

| Covariate                               | Transformation | Level | Direction |
|-----------------------------------------|----------------|-------|-----------|
| Summary exposure variable               | None           | 1     | 1         |
| Cholesterol (total, mean per capita)    | None           | 1     | 1         |
| Cumulative cigarettes (10 yrs)          | None           | 1     | 1         |
| Systolic blood pressure (mmHg)          | None           | 1     | 1         |
| Trans fatty acid (percent)              | None           | 1     | 1         |
| Mean BMI                                | None           | 2     | 1         |
| Healthcare access and quality index     | None           | 2     | -1        |
| Lag distributed income per capita (I\$) | Log            | 3     | -1        |
| Socio-demographic Index                 | None           | 3     | 0         |
| Omega-3 (kcal/capita, adjusted)         | Log            | 3     | -1        |
| Fruits (kcal/capita, adjusted)          | None           | 3     | -1        |
| Vegetables (kcal/capita, adjusted)      | None           | 3     | -1        |
| Nuts and seeds (kcal/capita, adjusted)  | None           | 3     | -1        |
| Whole grains (kcal/capita, adjusted)    | None           | 3     | -1        |
| Pulses/legumes (kcal/capita, adjusted)  | None           | 3     | -1        |
| PUFA adjusted (percent)                 | None           | 3     | -1        |
| Alcohol (litres per capita)             | None           | 3     | 0         |



## Peripheral Artery Disease

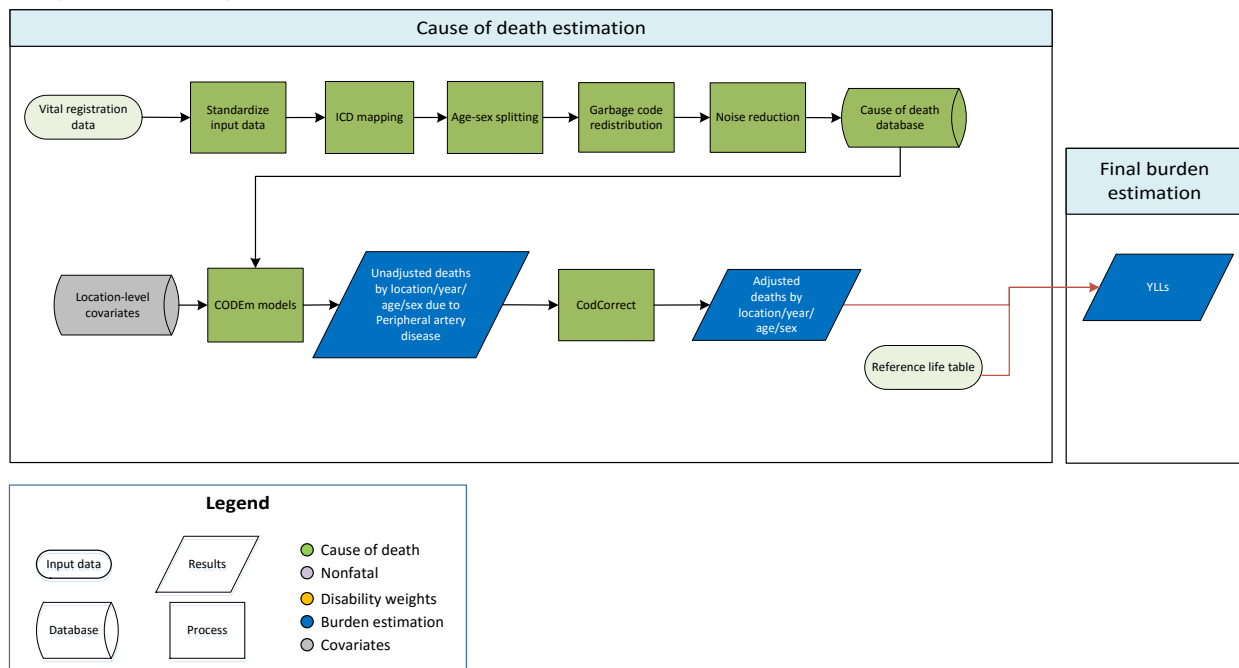

### Input data

Vital registration data were used to model peripheral artery disease. We outliered all data points with <1 death in Egypt per expert review.

### Modelling strategy

We used a standard CODEm approach to model deaths from peripheral artery disease. We have updated the covariates included in the ensemble modelling process (see Table). Otherwise, there have been no substantive changes from the approach used in GBD 2015.

**Table: Selected covariates for CODEm models, peripheral artery disease**

| Covariate                                 | Transformation | Level | Direction |
|-------------------------------------------|----------------|-------|-----------|
| Summary exposure variable                 | None           | 1     | 1         |
| Systolic blood pressure (mmHg)            | None           | 1     | 1         |
| Cholesterol (total, mean per capita)      | None           | 1     | 1         |
| Smoking prevalence                        | None           | 1     | 1         |
| Mean body mass index (kg/m <sup>2</sup> ) | None           | 2     | 1         |
| Healthcare access and quality index       | None           | 2     | -1        |
| Lag distributed income per capita (I\$)   | Log            | 3     | -1        |
| Socio-demographic Index                   | None           | 3     | 0         |
| Omega-3 (kcal/capita, adjusted)           | Log            | 3     | -1        |
| Fruits (kcal/capita, adjusted)            | None           | 3     | -1        |
| Vegetables (kcal/capita, adjusted)        | None           | 3     | -1        |
| Nuts and seeds (kcal/capita, adjusted)    | None           | 3     | -1        |
| Whole grains (kcal/capita, adjusted)      | None           | 3     | -1        |
| Pulses/legumes (kcal/capita, adjusted)    | None           | 3     | -1        |
| PUFA adjusted (percent)                   | None           | 3     | -1        |
| Trans fatty acid (percent)                | None           | 3     | 1         |
| Alcohol (litres per capita)               | None           | 3     | 0         |

## Endocarditis

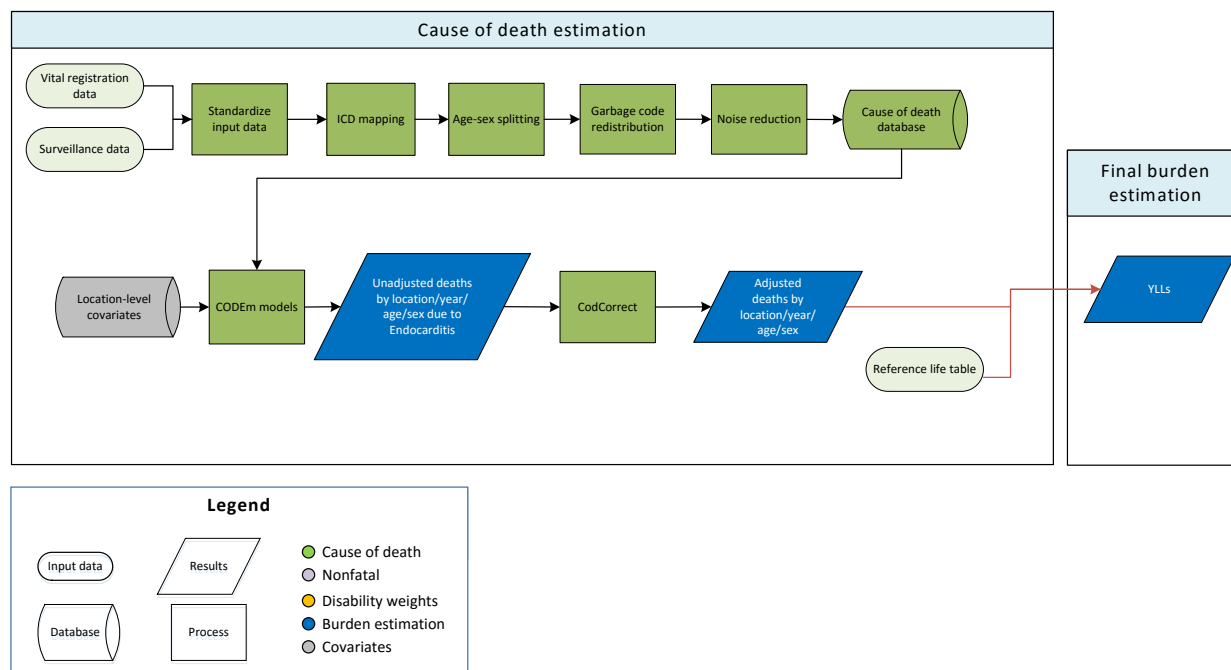

### Input data

Vital registration and surveillance data were used to model endocarditis. We outliered vital registration data in Mozambique as these were non-representative for sub-Saharan Africa and were causing regional estimates to be implausibly low. We also outliered ICD8 data that were discontinuous from the rest of the data series and created an implausible time trend.

### Modelling strategy

We used a standard CODEm approach to model deaths from endocarditis. We have updated the covariates included in the ensemble modelling process (see Table). Otherwise, there have been no substantive changes from the approach used in GBD 2015.

**Table: Selected covariates for CODEm models, endocarditis**

| Covariate                               | Transformation | Level | Direction |
|-----------------------------------------|----------------|-------|-----------|
| Summary exposure variable               | None           | 1     | 1         |
| Improved water (proportion)             | None           | 1     | -1        |
| Sanitation (proportion with access)     | None           | 1     | -1        |
| Healthcare access and quality index     | None           | 1     | -1        |
| Lag distributed income per capita (I\$) | Log            | 3     | -1        |
| Socio-demographic Index                 | None           | 3     | 0         |

## Other Cardiovascular and Circulatory Diseases

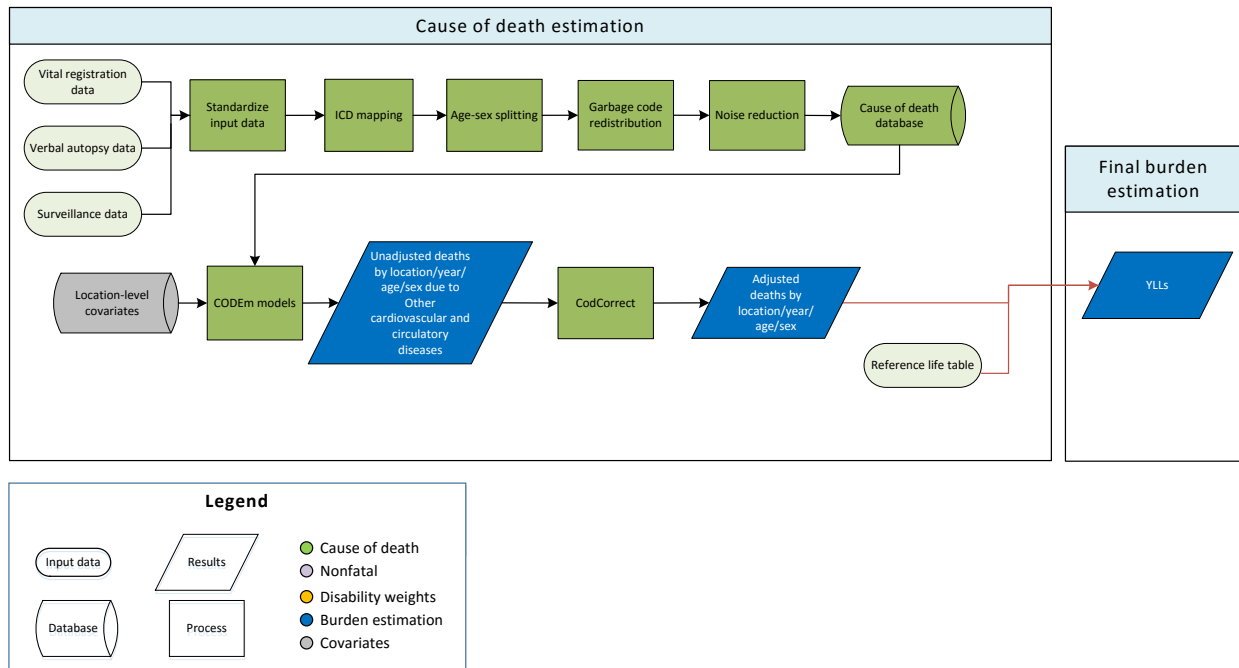

### Input data

Vital registration, verbal autopsy, and surveillance data were used to model other cardiovascular and circulatory diseases. We outliered ICD8 and ICD9 BTL data points that were inconsistent with the rest of the data and created implausible time trends. We also outliered ICD8 data points which were not nationally representative.

### Modelling strategy

We used a standard CODEm approach to model deaths from other circulatory and cardiovascular diseases. We have updated the covariates included in the ensemble modelling process (see Table). Otherwise, there have been no substantive changes from the approach used in GBD 2015.

**Table: Selected covariates for CODEm models, cardiovascular diseases**

| Covariate                                  | Transformation | Level | Direction |
|--------------------------------------------|----------------|-------|-----------|
| Summary exposure variable                  | None           | 1     | 1         |
| Cholesterol (total, mean per capita)       | None           | 1     | 1         |
| Smoking prevalence                         | None           | 1     | 1         |
| Systolic blood pressure (mmHg)             | None           | 1     | 1         |
| Trans fatty acid (percent)                 | None           | 1     | 1         |
| Mean BMI                                   | None           | 2     | 1         |
| Elevation over 1500m (proportion)          | None           | 2     | -1        |
| Fasting plasma glucose (mmol/L)            | None           | 2     | 1         |
| Indoor air pollution (all fuel types)      | None           | 2     | 1         |
| Outdoor air pollution (PM <sub>2.5</sub> ) | None           | 2     | 1         |
| Healthcare access and quality index        | None           | 2     | -1        |
| Lag distributed income per capita (I\$)    | Log            | 3     | -1        |
| Socio-demographic Index                    | None           | 3     | 0         |
| Omega-3 (kcal/capita, adjusted)            | Log            | 3     | -1        |
| Fruits (kcal/capita, adjusted)             | None           | 3     | -1        |
| Vegetables (kcal/capita, adjusted)         | None           | 3     | -1        |
| Nuts and seeds (kcal/capita, adjusted)     | None           | 3     | -1        |
| Whole grains (kcal/capita, adjusted)       | None           | 3     | -1        |
| Pulses/legumes (kcal/capita, adjusted)     | None           | 3     | -1        |
| PUFA adjusted (percent)                    | None           | 3     | -1        |
| Alcohol (litres per capita)                | None           | 3     | 0         |

## Chronic Respiratory Diseases

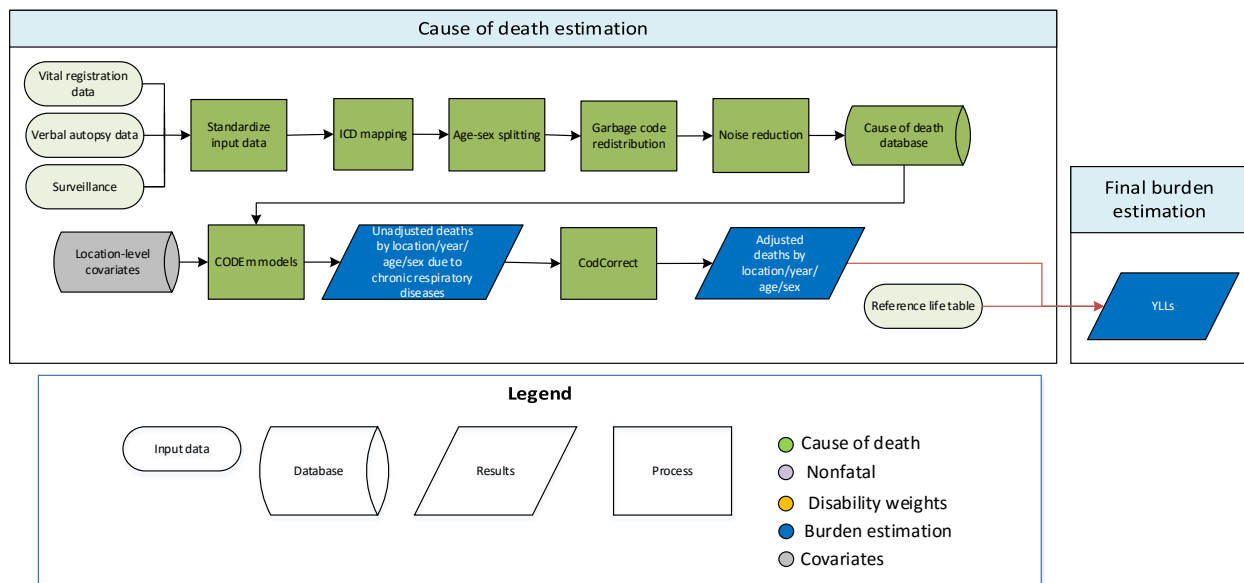

### Input data

Sources used to estimate chronic respiratory disease mortality included vital registration, verbal autopsy, and surveillance data from China. Our outlier criteria excluded data points that (1) were implausibly high or low, (2) substantially conflicted with established age or temporal patterns, or (3) significantly conflicted with other data sources conducted from the same locations or locations with similar characteristics (ie, Socio-demographic Index).

### Modelling strategy

The standard CODEm modelling approach was applied to estimate deaths due to chronic respiratory diseases. Chronic respiratory diseases served as the parent cause to chronic obstructive pulmonary disease, pneumoconiosis (including silicosis, asbestosis, coal worker’s pneumoconiosis, other pneumoconiosis), asthma, interstitial lung disease and pulmonary sarcoidosis, and other chronic respiratory diseases. Functionally, this means the death estimates for Chronic Respiratory Diseases serve as a “parent” envelope into which the “child” causes are squeezed by the CodCorrect algorithm. This approach allows us to use a broader range of data – specifically verbal autopsy data – which cannot be accurately mapped to specific respiratory diseases.

Separate models were conducted for male and female mortality, and the age range for both models was 0 to 95+ years. The same covariates from GBD 2015 were used, with the exception of indoor air pollution, which was changed from cooking-fuel-specific covariates to a generic all cooking fuel covariate.

| Level | Covariate                                                | Direction |
|-------|----------------------------------------------------------|-----------|
| 1     | log-transformed SEV scalar: chronic respiratory diseases | +         |

|   |                                                                |   |
|---|----------------------------------------------------------------|---|
|   | cumulative cigarettes (10 years)                               | + |
|   | cumulative cigarettes (5 years)                                | + |
|   | health care quality and access index                           | - |
| 2 | smoking prevalence                                             | + |
|   | indoor air pollution (all cooking fuels)                       | + |
|   | outdoor air pollution (PM <sub>2.5</sub> )                     | + |
|   | population above 1500m elevation (proportion)                  | + |
| 3 | log LDI (I\$ per capita)                                       | - |
|   | education (years per capita)                                   | - |
|   | Socio-demographic Index                                        | - |
|   | population between 500 and 1,500m elevation (proportion)       | + |
|   | population density over 1,000 people/square meter (proportion) | + |

Beyond changes in the underlying covariates, there were no substantial deviations from the GBD 2015 approach.

## Chronic Obstructive Pulmonary Disease

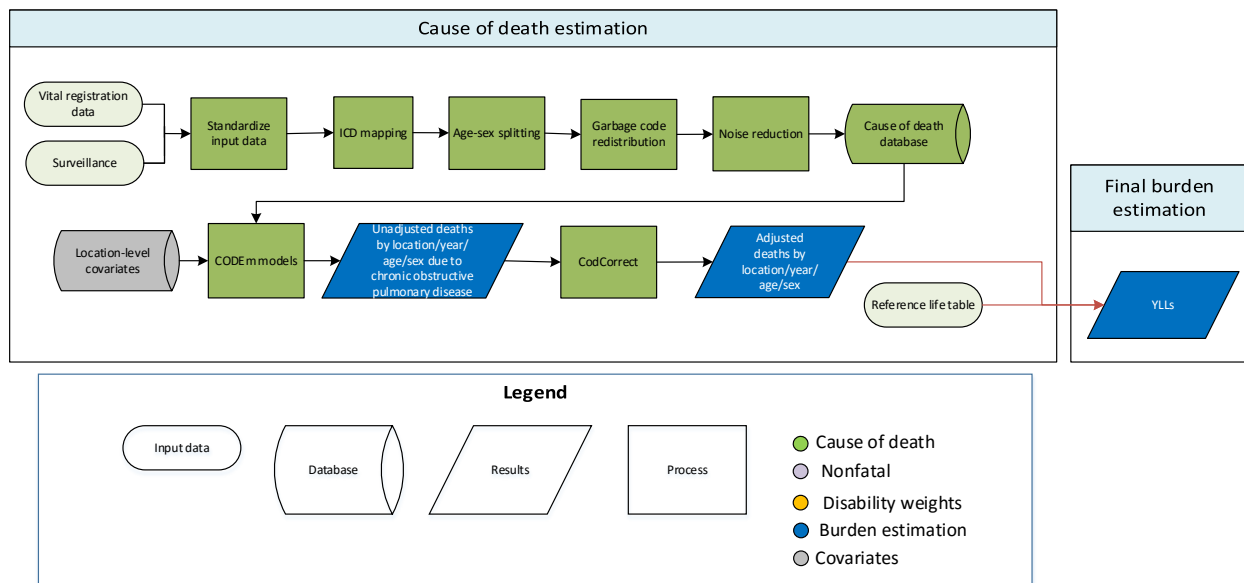

### Input data

Data used to estimate chronic obstructive pulmonary disease (COPD) mortality included vital registration and surveillance data from the cause of death (COD) database. Our outlier criteria excluded data points that (1) were implausibly high or low, (2) substantially conflicted with established age or temporal patterns, or (3) significantly conflicted with other data sources conducted from the same locations or locations with similar characteristics (ie, Socio-demographic Index).

### Modelling strategy

The standard CODEm modelling approach was applied to estimate deaths due to COPD. Separate models were conducted for male and female mortality, and the age range for both models was 1-95+ years. The mortality estimates from the COPD models were ultimately fit into the chronic respiratory diseases envelope.

The same covariates from GBD 2015 were used, with the exception of indoor air pollution, which was changed from cooking-fuel-specific covariates to a generic all cooking fuel covariate, and the health care access and quality index covariate, which was used in place of health systems access.

| Level | Covariate                          | Direction |
|-------|------------------------------------|-----------|
| 1     | log-transformed SEV scalar: COPD   | +         |
|       | cumulative cigarettes (10 years)   | +         |
|       | cumulative cigarettes (5 years)    | +         |
|       | elevation over 1,500m (proportion) | +         |



|   |                                            |   |
|---|--------------------------------------------|---|
| 2 | smoking prevalence                         | + |
|   | indoor air pollution (all cooking fuels)   | + |
|   | outdoor air pollution (PM <sub>2.5</sub> ) | + |
|   | health care access and quality index       | - |
| 3 | Socio-demographic Index                    | - |
|   | log LDI (I\$ per capita)                   | - |
|   | education (years per capita)               | - |

## Pneumoconiosis diseases: Silicosis, asbestosis, coal worker’s pneumoconiosis, and other pneumoconiosis

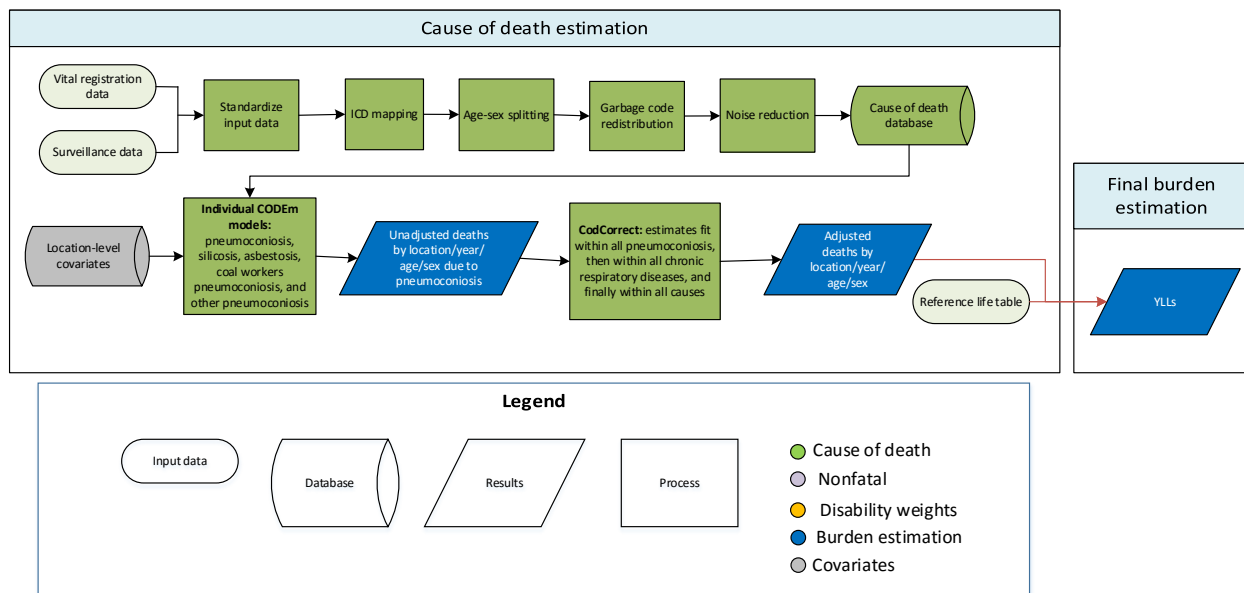

### Input data

Data used to estimate pneumoconiosis diseases mortality included vital registration and China mortality surveillance data from the cause of death (COD) database. Our outlier criteria excluded data points that (1) were implausibly high or low, (2) substantially conflicted with established age or temporal patterns, or (3) significantly conflicted with other data sources conducted from the same locations or locations with similar characteristics (i.e., socio-demographic index).

### Modelling strategy

The standard CODEm modelling approach was applied to estimate deaths due to pneumoconiosis diseases. Separate models were conducted for male and female mortality, and the age range for both models was 1–95+ years. The mortality estimates from pneumoconiosis disease models were ultimately fit into the chronic respiratory envelope, which is the parent cause for pneumoconiosis disease. The pneumoconiosis model serves as an envelope for silicosis, asbestosis, coal worker’s pneumoconiosis, and other pneumoconiosis. In CoDCorrect, estimates are first fit within all pneumoconiosis, then within all chronic respiratory disease, before being fit to the all-cause mortality envelope.

For the most part, the same covariates from GBD 2015 were used. Indoor air pollution was changed from cooking-fuel specific covariates to a generic all cooking fuel covariate. Adjustments were also made to the coal and asbestos covariates.

The coal production covariate was improved to include subnational data for the United States and India. United States state-level data for 2001-2015 came from the U.S. Energy Information Administration. India state-level data for 2005-2014 came from the Ministry of Coal in India. We scaled these figures to the national estimates from the BP Statistical Review of World Energy 2016. For years with missing

state-level data we split the national-level data according to the proportions by state in the closest year for which we did have state-level data.

We also created a covariate for asbestos consumption per capita with a 30-year lag, and used that instead of the GBD 2015 asbestos production covariate. This change is based on the idea that asbestos production may be too limited in scope, given that asbestosis may occur in locations where asbestos is used and handled but not necessarily mined. To create the asbestos consumption covariate we used data from the United States Geological Survey to run a model in DisMod 2.1. A 30-year lag was placed on this model to account for the delay between asbestos consumption and occurrence of disease.

The following table indicates covariates used in the pneumoconiosis models, their level, and direction:

| Level | Covariate                                  | Direction |
|-------|--------------------------------------------|-----------|
| 1     | log-transformed SEV scalar: pneumoconiosis | +         |
|       | asbestos consumption per capita*           | +         |
|       | coal production per capita*                | +         |
|       | gold production per capita*                | +         |
| 2     | smoking prevalence                         | +         |
|       | indoor air pollution (all cooking fuels)   | +         |
|       | cumulative cigarettes (5 years)            | +         |
|       | elevation over 1,500m (proportion)         | +         |
|       | elevation 500 to 1,500m (proportion)       | +         |
|       | health care access and quality index       | -         |
| 3     | log LDI (I\$ per capita)                   | -         |
|       | education (years per capita)               | -         |
|       | Socio-demographic Index                    | -         |

\* asbestos, coal, and gold covariates are each only used in a subset of the pneumoconiosis models, as follows: all three are included in the parent all pneumoconiosis model, asbestos consumption is included in the asbestosis model, coal production is included in the coal worker's pneumoconiosis model, and gold production is included in the silicosis model.

## Asthma

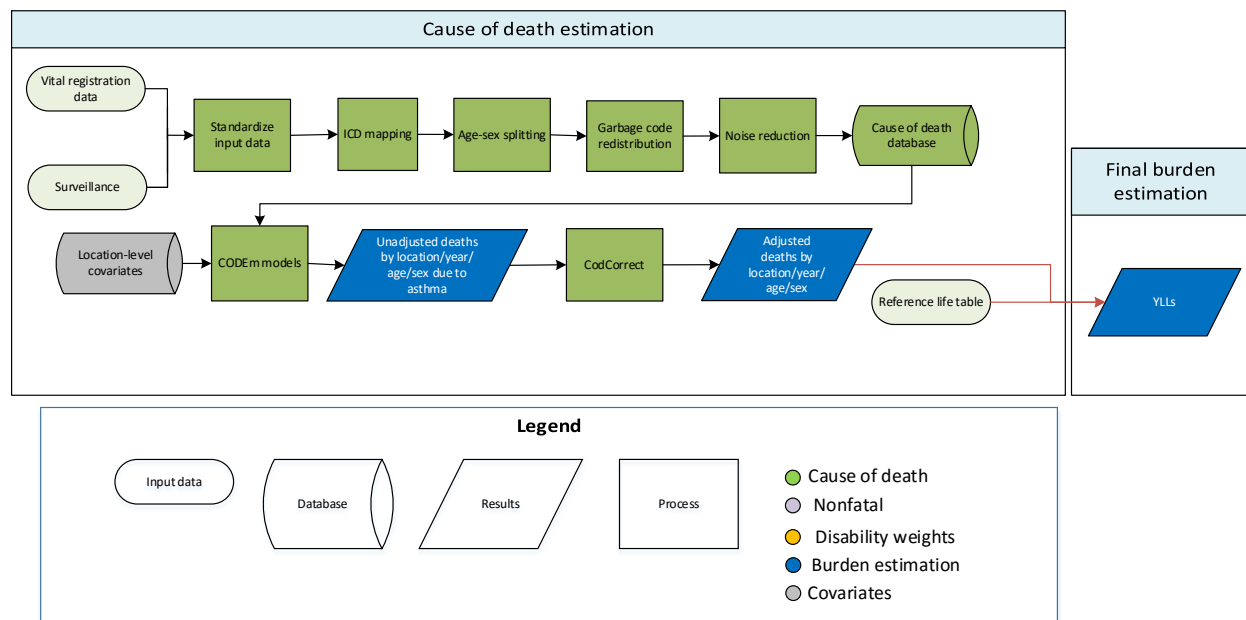

### Input data

Data used to estimate asthma mortality included vital registration and surveillance data from the cause of death (COD) database. Verbal autopsy data were not included and were instead mapped to the parent model (Chronic Respiratory Diseases). Our outlier criteria excluded data points that (1) were implausibly high or low relative to global or regional patterns, (2) substantially conflicted with established age or temporal patterns, or (3) significantly conflicted with other data sources conducted from the same locations or locations with similar characteristics (ie, Socio-demographic Index).

### Modelling strategy

The standard CODEm modelling approach was applied to estimate deaths due to asthma. Separate models were conducted for male and female mortality, and the age range for both models was 1–95+ years. The mortality estimates from the asthma models were ultimately fit into the chronic respiratory diseases envelope.

The same covariates from GBD 2015 were used, with the exception of indoor air pollution, which was changed from cooking-fuel-specific covariates to a generic all cooking fuel covariate.

| Level | Covariate                          | Direction |
|-------|------------------------------------|-----------|
| 1     | log-transformed SEV scalar: asthma | +         |
|       | cumulative cigarettes (10 years)   | +         |
|       | cumulative cigarettes (5 years)    | +         |

|   |                                            |   |
|---|--------------------------------------------|---|
|   | health care access and quality index       | - |
| 2 | smoking prevalence                         | + |
|   | indoor air pollution (all cooking fuels)   | + |
|   | outdoor air pollution (PM <sub>2.5</sub> ) | + |
| 3 | log LDI (I\$ per capita)                   | - |
|   | education (years per capita)               | - |
|   | Socio-demographic Index                    | - |

## Interstitial lung disease and pulmonary sarcoidosis

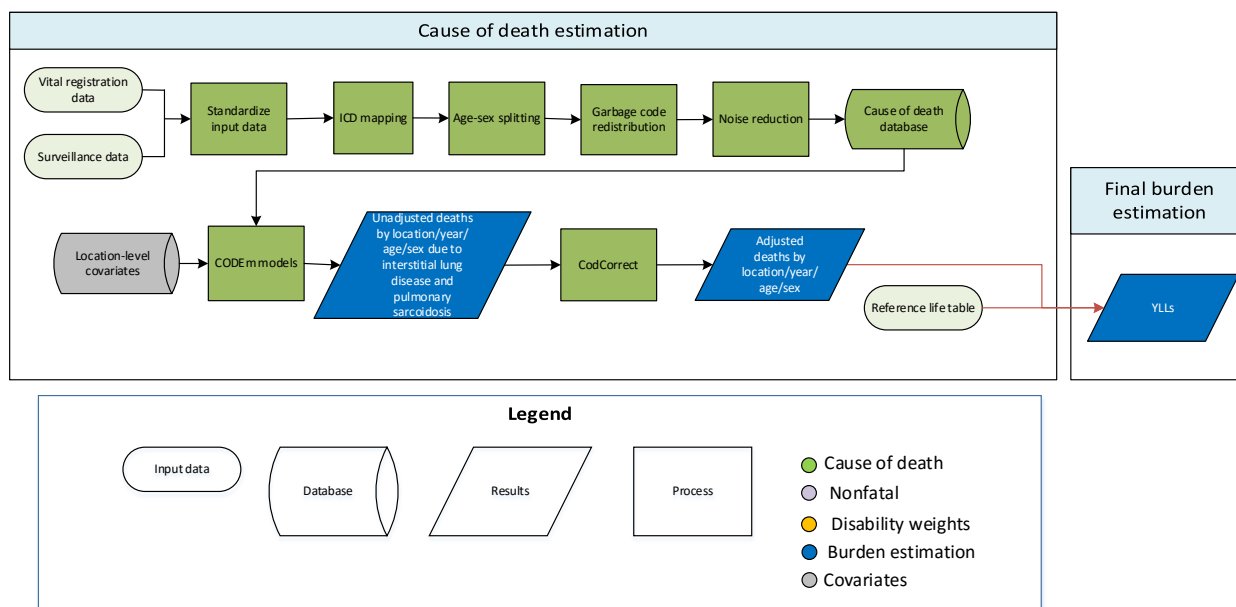

### Input data

Data used to estimate interstitial lung disease and pulmonary sarcoidosis mortality included vital registration and surveillance data from the cause of death (COD) database. Our outlier criteria excluded data points that (1) were implausibly high or low, (2) substantially conflicted with established age or temporal patterns, or (3) significantly conflicted with other data sources conducted from the same locations or locations with similar characteristics (ie, Socio-demographic Index).

### Modelling strategy

The standard CODEm modelling approach was applied to estimate deaths due to interstitial lung disease and pulmonary sarcoidosis. Separate models were conducted for male and female mortality, and the age range for both models was 1–95+ years. The mortality estimates from the interstitial lung disease and pulmonary sarcoidosis models were ultimately fit into the chronic respiratory envelope.

The same covariates from GBD 2015 were used, with the exception of indoor air pollution, which was changed from cooking-fuel-specific covariates to a generic all cooking fuel covariate.

| Level | Covariate                                             | Direction |
|-------|-------------------------------------------------------|-----------|
| 1     | log-transformed SEV scalar: interstitial lung disease | +         |
|       | smoking prevalence                                    | +         |
|       | cumulative cigarettes (5 years)                       | +         |
| 2     | elevation over 1,500m (proportion)                    | +         |

|   |                                                     |   |
|---|-----------------------------------------------------|---|
|   | elevation between 500 and 1,500m (proportion)       | + |
|   | population density over 1,000 ppl/sqkm (proportion) | + |
|   | indoor air pollution (all cooking fuels)            | + |
|   | outdoor air pollution (PM <sub>2.5</sub> )          | + |
|   | health care access and quality index                | - |
| 3 | log LDI (I\$ per capita)                            | - |
|   | education (years per capita)                        | - |
|   | Socio-demographic Index                             | - |

## Other chronic respiratory diseases

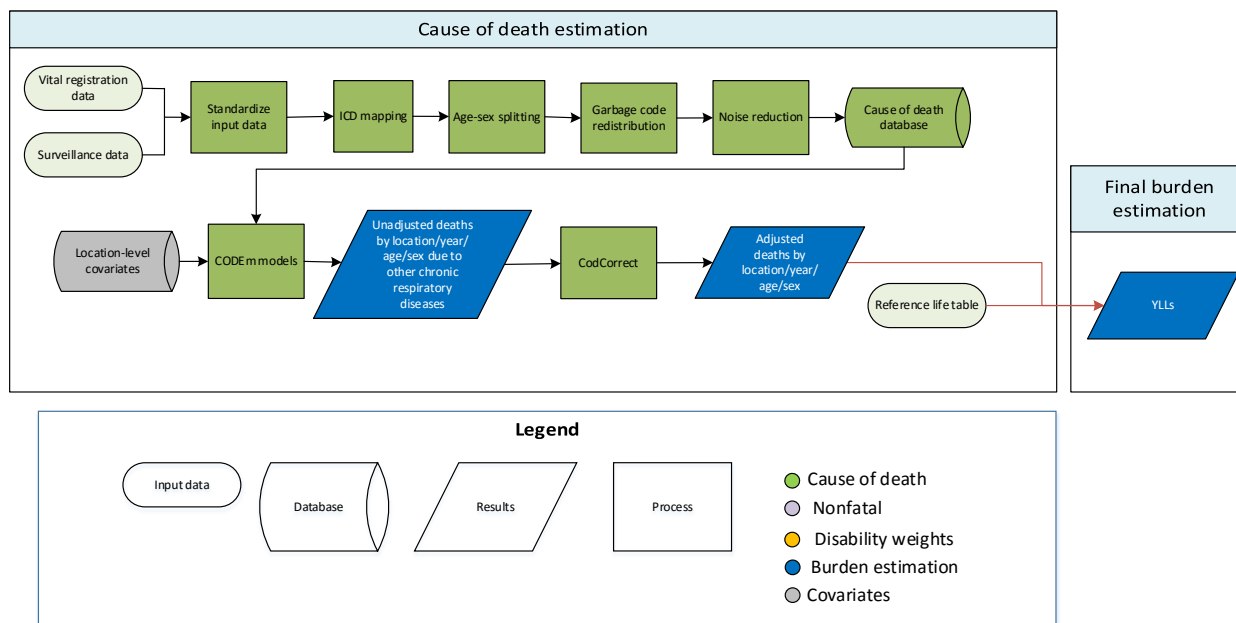

### Input data

Data used to estimate other chronic respiratory diseases included vital registration and surveillance data from the cause of death (COD) database. Our outlier criteria excluded data points that (1) were implausibly high or low, (2) substantially conflicted with established age or temporal patterns, or (3) significantly conflicted with other data sources conducted from the same locations or locations with similar characteristics (ie, Socio-demographic Index).

### Modelling strategy

The standard CODEm modelling approach was applied to estimate deaths due to other chronic respiratory diseases. Separate models were conducted for male and female mortality, and the age range for both models was 0 days to 95+ years. Like other respiratory causes, the mortality estimates from other chronic respiratory diseases were ultimately fit into the chronic respiratory envelope.

The same covariates from GBD 2015 were used, with the exception of indoor air pollution, which was changed from cooking-fuel-specific covariates to a generic all cooking fuel covariate.

| Level | Covariate                                                      | Direction |
|-------|----------------------------------------------------------------|-----------|
| 1     | log-transformed SEV scalar: other chronic respiratory diseases | +         |
|       | smoking prevalence                                             | +         |
|       | cumulative cigarettes (5 years)                                | +         |
|       | indoor air pollution (all cooking fuels)                       | +         |



|   |                                                     |   |
|---|-----------------------------------------------------|---|
|   | outdoor air pollution (PM <sub>2.5</sub> )          | + |
| 2 | elevation over 1,500m (proportion)                  | + |
|   | elevation between 500 and 1,500m (proportion)       | + |
|   | population density over 1,000 ppl/sqkm (proportion) | + |
|   | health care access and quality index                | - |
| 3 | log LDI (I\$ per capita)                            | - |
|   | education (years per capita)                        | - |
|   | Socio-demographic Index                             | - |

## Cirrhosis

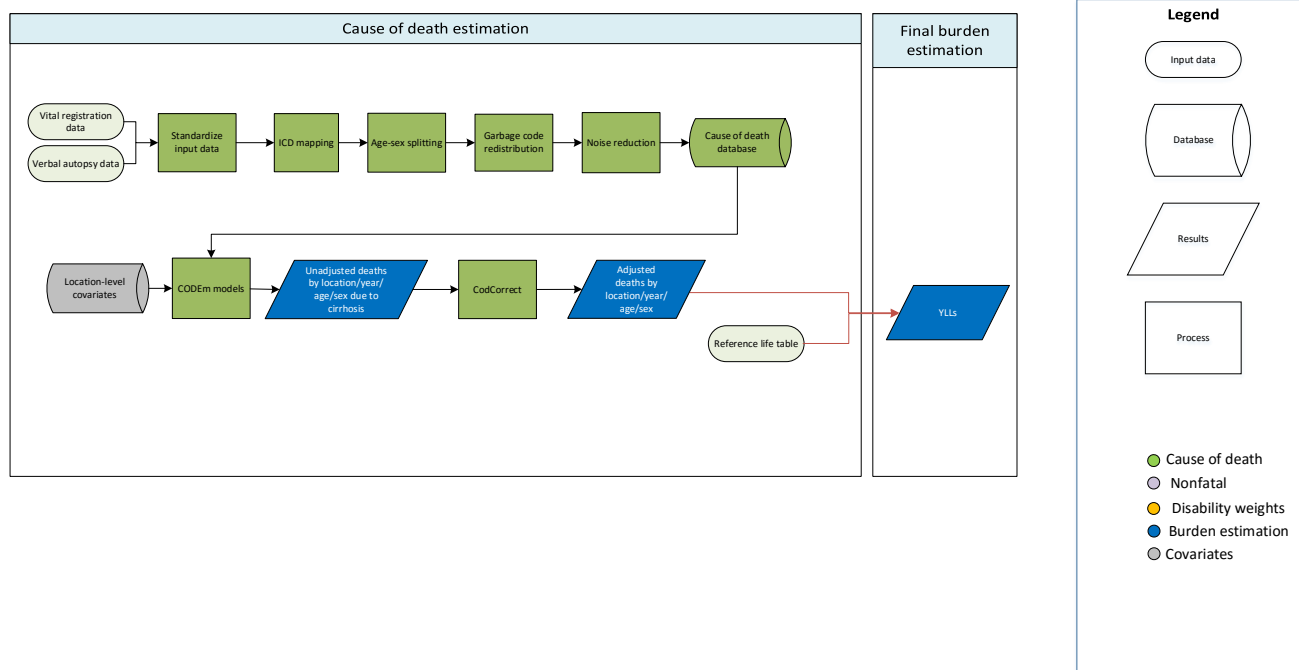

### Input data

We modelled cirrhosis mortality using vital registration and verbal autopsy data in the cause of death database. We outliered data in instances where garbage code redistribution and noise reduction, in combination with small sample sizes, resulted in unreasonable cause fractions; and data that violated well-established time or age trends.

### Modelling strategy

We modelled deaths due to cirrhosis with a standard CODEm model using the cause of death database and location-level covariates as inputs. We hybridized separate global and data-rich models to acquire unadjusted results, which we finalized and adjusted using CodCorrect to reach final YLLs due to cirrhosis.

There were no substantive changes in the modelling strategy for cirrhosis from GBD 2015 to GBD 2016.

| Covariate                               | Level | Direction |
|-----------------------------------------|-------|-----------|
| Alcohol (liters per capita)             | 1     | 1         |
| Diabetes prevalence (age standardized)  | 2     | 1         |
| Education (years per capita)            | 3     | -1        |
| Health system access 2                  | 3     | -1        |
| Log LDI (I\$ per capita)                | 3     | -1        |
| Mean body mass index                    | 2     | 1         |
| Schistosomiasis prevalence (proportion) | 1     | 1         |
| Socio-demographic Index                 | 3     | 0         |
| Hepatitis B prevalence                  | 1     | 1         |
| Hepatitis C prevalence                  | 1     | 1         |
| Healthcare access and quality index     | 2     | -1        |

## Cirrhosis by aetiology

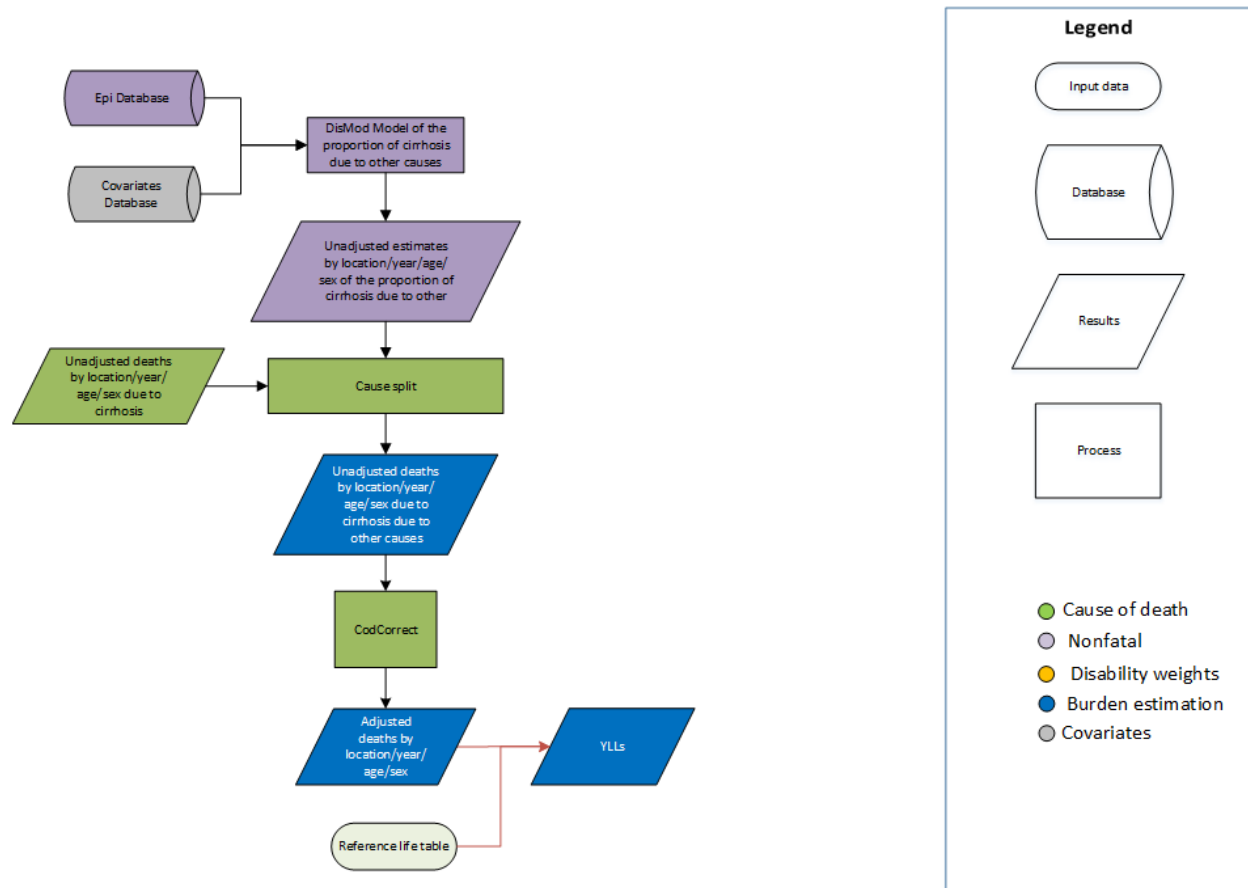

### Input data

We conducted a literature review for studies reporting aetiologies of cirrhosis patients.

### Modelling strategy

We first modelled all cirrhosis mortality using all available data in the cause of death database and a hybrid CODEm model. To estimate mortality from cirrhosis due to alcohol, cirrhosis due to hepatitis B, cirrhosis due to hepatitis C, and cirrhosis due to other causes, we developed aetiological proportion models using DisMod and used the results of these models to split the parent cirrhosis mortality estimates.

Given the similar aetiologies for liver cancer and cirrhosis we integrated the aetiology models for these two causes. We have more data for liver cancer aetiologies than we do for cirrhosis. Therefore, we first developed four single-parameter DisMod models, each to estimate the proportion of liver cancer due to a given cause (ie, alcohol, hepatitis B, hepatitis C, and other). These models included as covariates alcohol consumption (litres per capita), hepatitis B surface antigen (HBsAg) seroprevalence, and hepatitis C (anti-HCV IgG) seroprevalence. Moreover, the model for the proportion due to alcohol

included a covariate for the percentage of alcohol abstainers. Estimates from these liver cancer models were then used as covariates (along with alcohol, HBsAg, and anti-HCV) in all of the corresponding cirrhosis aetiology. Estimates from these cirrhosis models were then similarly used as covariates in the corresponding liver cancer models. Proportions from the four etiology models were then rescaled to sum to 1 at the draw level, and used to split the parent cirrhosis mortality estimates.

There were no substantive changes in the modelling strategy for cirrhosis from GBD 2015 to GBD 2016.

## Digestive Diseases

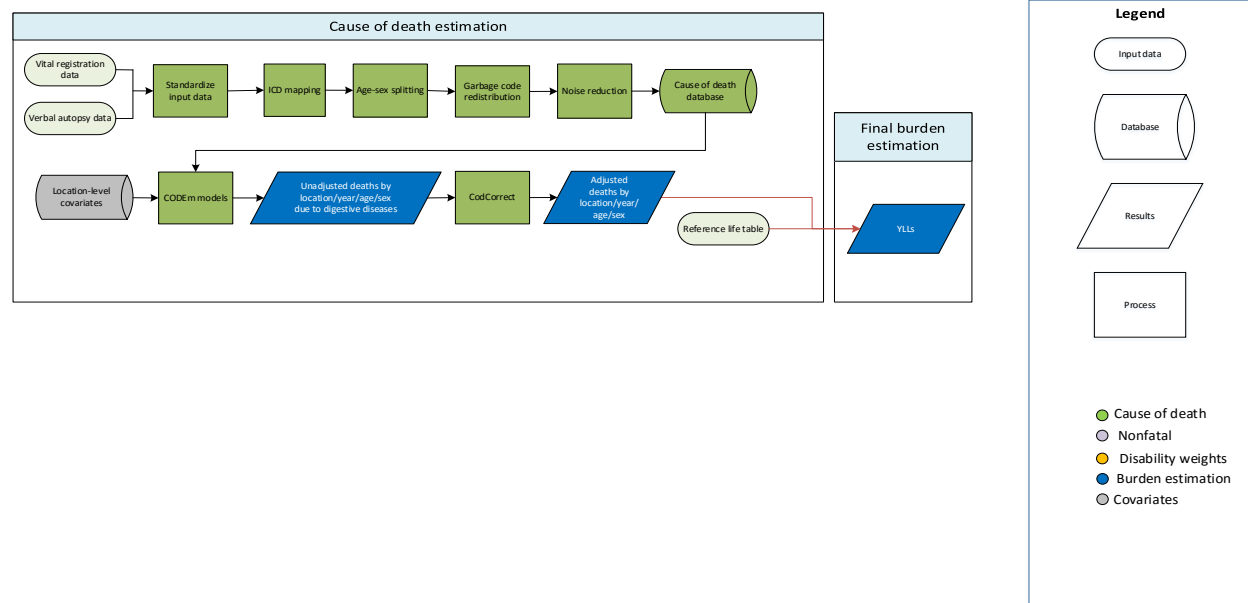

### Input data

Data used to estimate mortality of digestive diseases consisted of vital registration data and verbal autopsy data from the cause of death (COD) database. We outliered data in instances where garbage code redistribution and noise reduction, in combination with small sample sizes, resulted in unreasonable cause fractions; and data that violated well-established time or age trends. Outlying methods were consistent across both vital registration and verbal autopsy data. The data in digestive diseases consists of aggregated data from all other specific digestive diseases, as well as unique data points from unspecified codes of digestive disease.

### Modelling strategy

We modelled deaths due to all digestive diseases with a standard CODEm model using the cause of death database and location-level covariates as inputs. The model followed standard parameters. We hybridized separate global and data-rich models to acquire unadjusted results, which we finalized and adjusted using CoDCorrect to reach final years of life lost (YLLs) due to digestive diseases. In GBD 2016 we added the healthcare access and quality index (HAQI) covariate to the model.

| Covariate                               | Level | Direction |
|-----------------------------------------|-------|-----------|
| Alcohol (liters per capita)             | 1     | 1         |
| Cumulative cigarettes (10 years)        | 1     | 1         |
| Education (years per capita)            | 3     | -1        |
| Lag distributed income (per capita)     | 3     | -1        |
| Underweight (proportion weight for age) | 2     | 1         |
| Sanitation (proportion with access)     | 1     | -1        |
| Sociodemographic index                  | 3     | -1        |
| Fruits (grams adjusted)                 | 2     | -1        |
| Red meats (grams adjusted)              | 2     | 1         |
| Health access and quality index         | 2     | -1        |

## Peptic ulcer disease

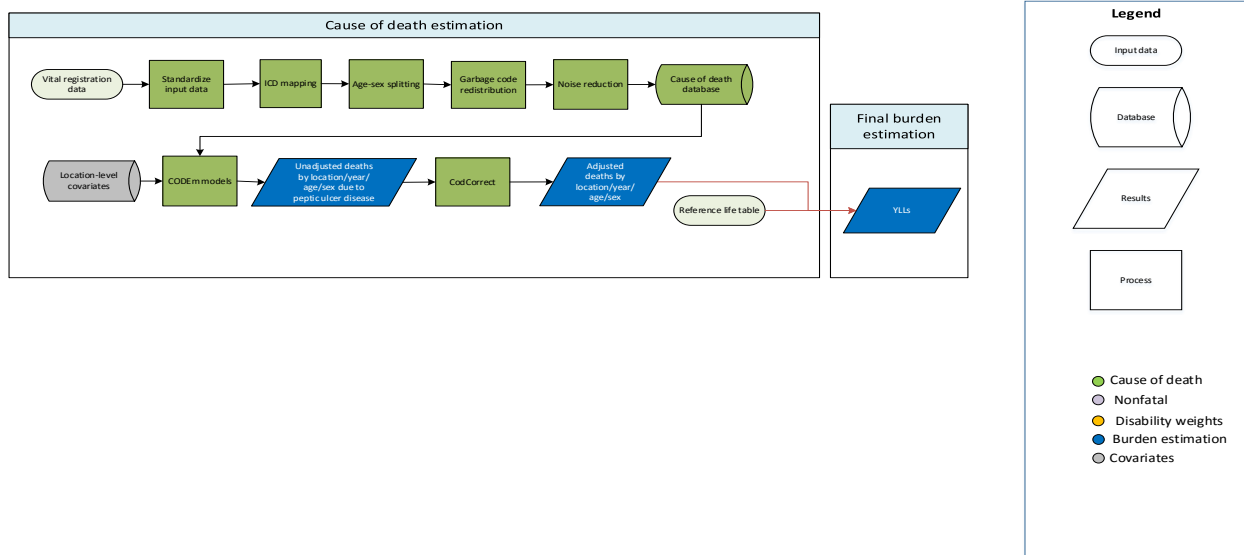

### Input data

Data used to estimate mortality of peptic ulcer disease consisted of vital registration data from the cause of death (COD) database. We outliered data in instances where garbage code redistribution and noise reduction, in combination with small sample sizes, resulted in unreasonable cause fractions, and data that violated well-established time or age trends.

### Modelling strategy

We modelled deaths due to peptic ulcer disease with a standard CODEm model using the cause of death database and location-level covariates as inputs. The model followed standard parameters, with the exception that the start age of the model was 1 year old instead of 0. We hybridized separate global and data-rich models to acquire unadjusted results, which we finalized and adjusted using CodCorrect to reach final years of life lost (YLLs) due to peptic ulcer disease. The covariate changes from GBD 2015 to GBD 2016 include changing the directionality of vegetables adjusted (grams per person availability) from -1 to 0, the addition of the summary exposure variable unsafe water, and the addition of the healthcare access and quality index (HAQI) covariate.

| Covariate                                      | Level | Direction |
|------------------------------------------------|-------|-----------|
| Alcohol (liters per capita)                    | 1     | 1         |
| Cumulative cigarettes (10 years)               | 1     | 1         |
| Cumulative cigarettes (5 years)                | 1     | 1         |
| Lag distributed income (per capita)            | 3     | -1        |
| Sanitation (proportion with access)            | 2     | -1        |
| Smoking (prevalence)                           | 1     | 1         |
| Maternal education (years per capita)          | 3     | -1        |
| Improved water source (proportion with access) | 2     | 1         |
| Sociodemographic index                         | 3     | -1        |
| Vegetables (grams adjusted)                    | 2     | 0         |
| Health access and quality index                | 2     | -1        |

## Gastritis and duodenitis

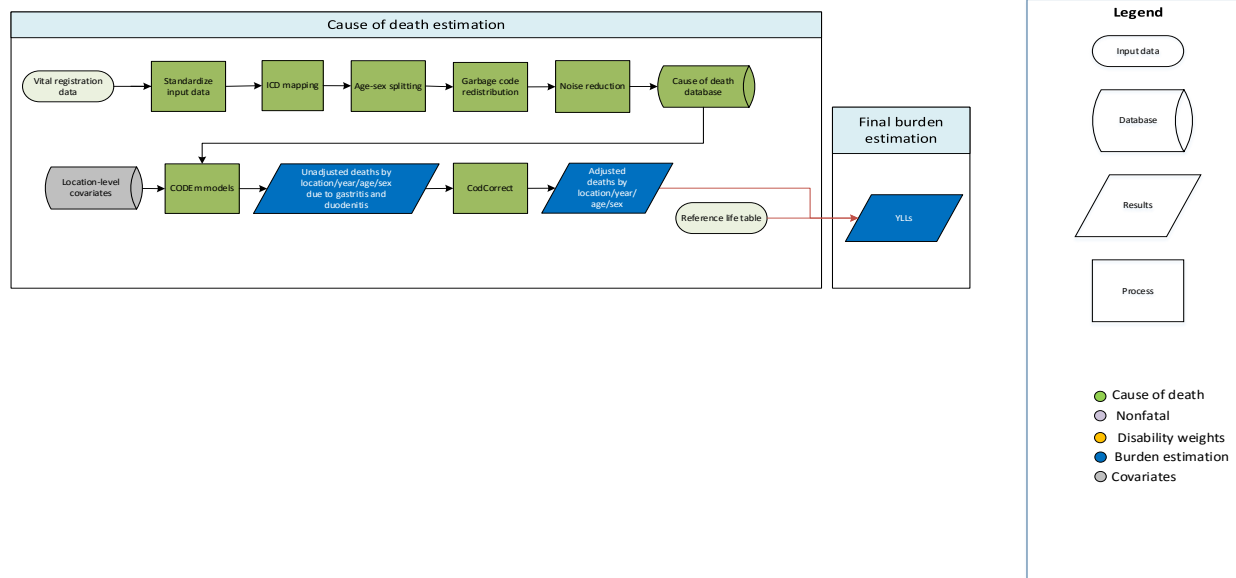

### Input data

Vital registration data were used to model this cause. We outliered data in instances where garbage code redistribution and noise reduction, in combination with small sample sizes, resulted in unreasonable cause fractions, and data that violated well-established time or age trends.

### Modelling strategy

We modelled deaths due to gastritis and duodenitis with a standard CODEm model using the cause of death database and location-level covariates as inputs. The model followed standard parameters, with the exception that the start age of the model was 1 year old instead of 0 and the linear floor rate was lowered to 0.001 in order to better capture low data. We hybridized separate global and data-rich models to acquire unadjusted results, which we finalized and adjusted using CodCorrect to reach final years of life lost (YLLs) due to gastritis and duodenitis. The covariate changes from GBD 2015 to GBD 2016 include a replacement of the covariate “improved water source” (proportion with access) to the summary exposure variable “unsafe water”, and the addition of the healthcare access and quality index (HAQI) covariate.

| Covariate                                | Level | Direction |
|------------------------------------------|-------|-----------|
| Alcohol (liters per capita)              | 1     | 1         |
| Cumulative cigarettes (10 years)         | 1     | 1         |
| Cumulative cigarettes (5 years)          | 1     | 1         |
| Education (years per capita)             | 3     | -1        |
| Lag distributed income (per capita)      | 3     | -1        |
| Sanitation (proportion with access)      | 2     | -1        |
| Smoking prevalence                       | 1     | 1         |
| Unsafe water (summary exposure variable) | 2     | 1         |
| Sociodemographic index                   | 3     | -1        |
| Vegetables (grams adjusted)              | 2     | 0         |
| Health access and quality index          | 2     | -1        |

## Appendicitis

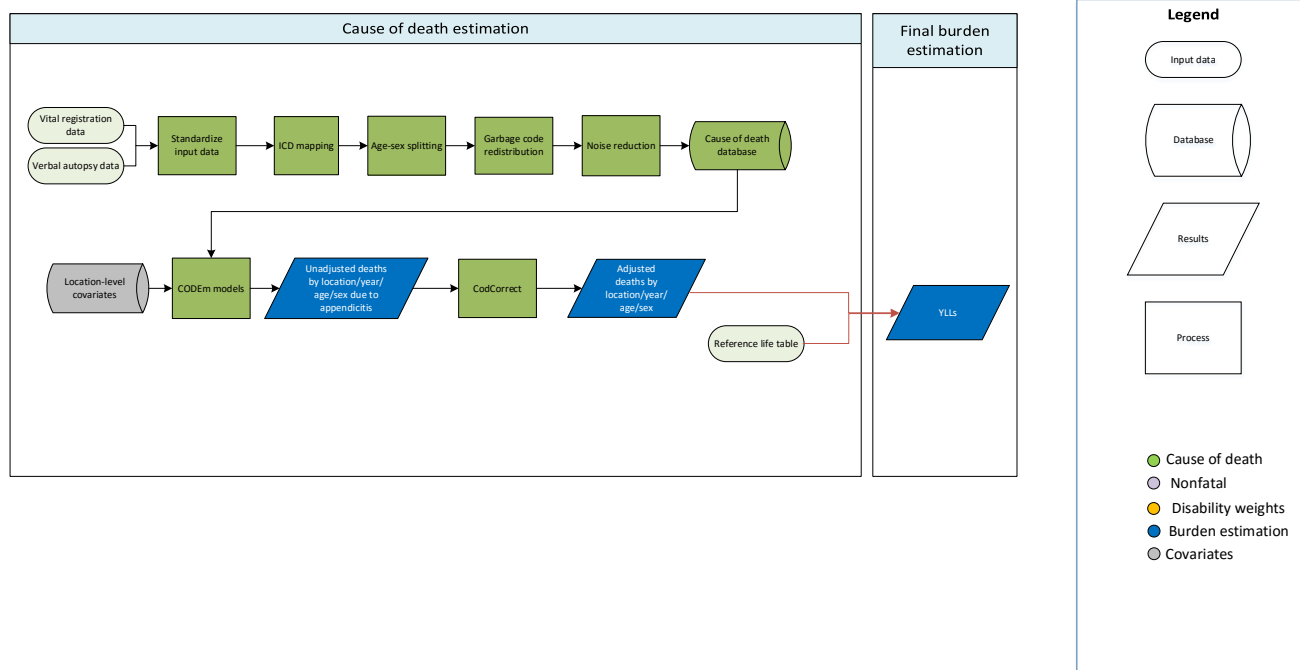

### Input data

Data used to estimate appendicitis mortality consisted of vital registration and verbal autopsy data from the cause of death (COD) database. We outliered data in instances where garbage code redistribution and noise reduction, in combination with small sample sizes, resulted in unreasonable cause fractions; and data that violated well-established time or age trends.

### Modelling strategy

We modelled deaths due to appendicitis with a standard CODEm model using the cause of death database and location-level covariates as inputs. The model followed standard parameters, with the exception that the start age of the model was 1 year old instead of 0 and the linear floor rate was lowered to 0.0001 in order to better capture low data. We hybridized separate global and data-rich models to acquire unadjusted results, which we finalized and adjusted using CodCorrect to reach final YLLs due to appendicitis.

There were no significant changes in the modelling process between GBD 2015 and GBD 2016.

| Covariate                           | Level | Direction |
|-------------------------------------|-------|-----------|
| Education (years per capita)        | 3     | -1        |
| Log LDI (I\$ per capita)            | 3     | -1        |
| Health system access (capped)       | 3     | -1        |
| Socio-demographic Index             | 3     | -1        |
| Fruits adjusted (g)                 | 2     | -1        |
| Vegetables adjusted (g)             | 2     | -1        |
| Healthcare access and quality index | 2     | -1        |



## Paralytic Ileus and Intestinal Obstruction

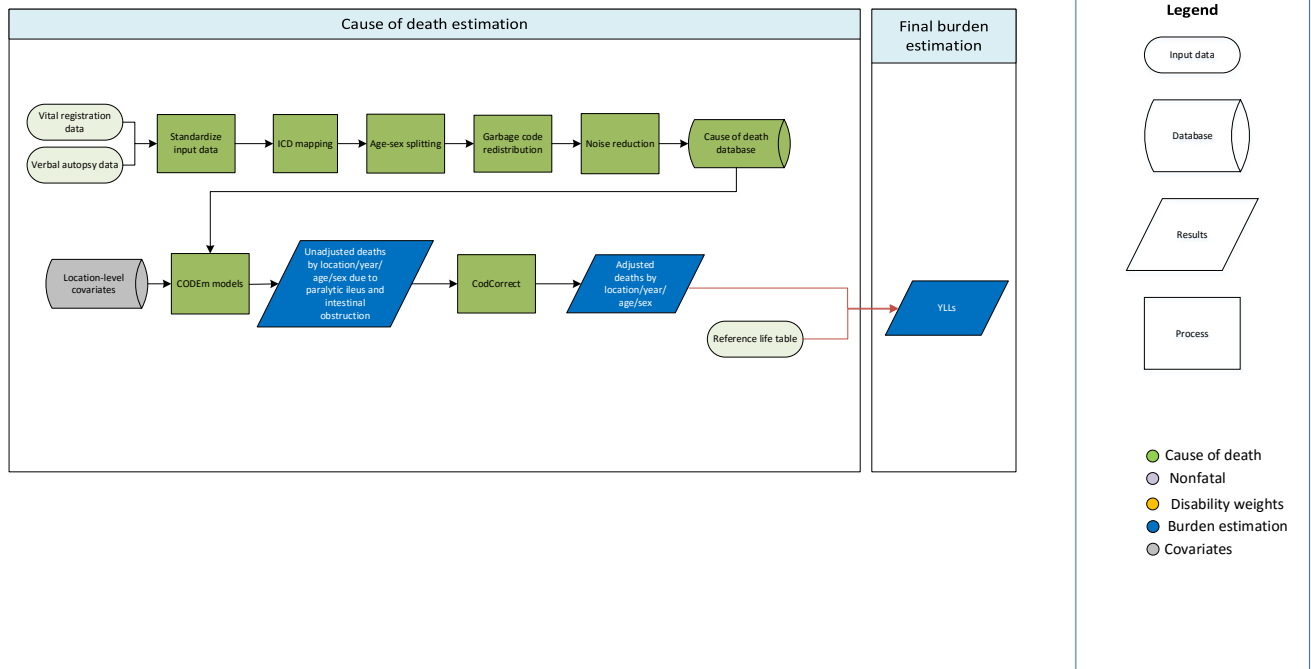

### Input data

Data used to estimate cellulitis mortality consisted of vital registration and verbal autopsy data from the cause of death (COD) database. We outliered all VA data in children under the age of 1 because it is not possible to accurately diagnose paralytic ileus or intestinal obstruction in this age group; and data that violated well-established time or age trends; and data in instances where garbage code redistribution and noise reduction, in combination with small sample sizes, resulted in unreasonable cause fractions.

### Modelling strategy

We modelled deaths due to paralytic ileus and intestinal obstruction with a standard CODEm model using the cause of death database and location-level covariates as inputs. The model followed standard parameters, with the exception that the linear floor rate was lowered to 0.0001 in order to better capture low data. We hybridized separate global and data-rich models to acquire unadjusted results, which we finalized and adjusted using CodCorrect to reach final YLLs due to paralytic ileus and intestinal obstruction.

There were no significant changes in the modelling process between GBD 2015 and GBD 2016.

| Covariate                           | Level | Direction |
|-------------------------------------|-------|-----------|
| Education (years per capita)        | 3     | -1        |
| Log LDI (I\$ per capita)            | 3     | -1        |
| Health system access (capped)       | 3     | -1        |
| Socio-demographic Index             | 3     | -1        |
| Fruits adjusted (g)                 | 2     | -1        |
| Vegetables adjusted (g)             | 2     | -1        |
| Healthcare access and quality index | 2     | -1        |

## Vascular Intestinal Disorders

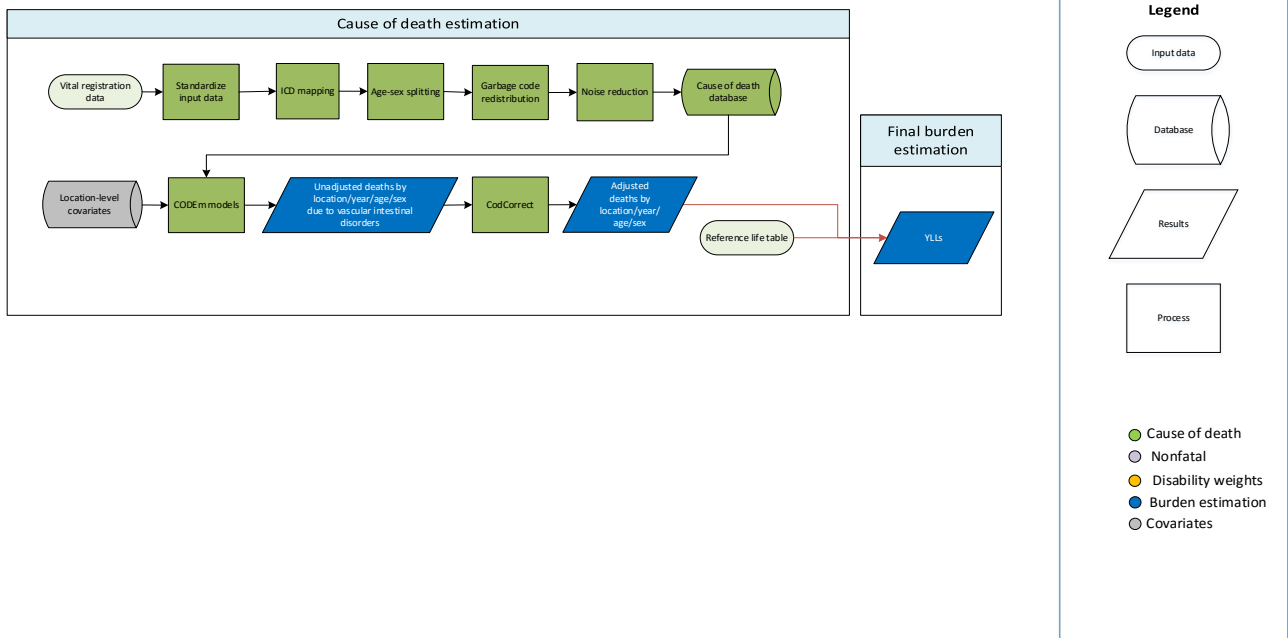

### Input data

Vital registration data were used to model this cause. We outliered data in instances where garbage code redistribution and noise reduction, in combination with small sample sizes, resulted in unreasonable cause fractions; and data that violated well-established time or age trends.

### Modeling strategy

We modeled deaths due to vascular intestinal disorders with a standard CODEm model using the cause of death database and location-level covariates as inputs. The model followed standard parameters, with the exception that the start age of the model was 1 year old instead of 0 and the linear floor rate was lowered to 0.0001 in order to better capture low data. We hybridized separate global and data-rich models to acquire unadjusted results, which we finalized and adjusted using CodCorrect to reach final YLLs due to vascular intestinal disorders. In GBD 2016, we replaced the animal fats (kcal per capita) covariate with the updated saturated fats (adjusted percentage of total calories available) covariate.

## Inguinal, Femoral, and Abdominal Hernias

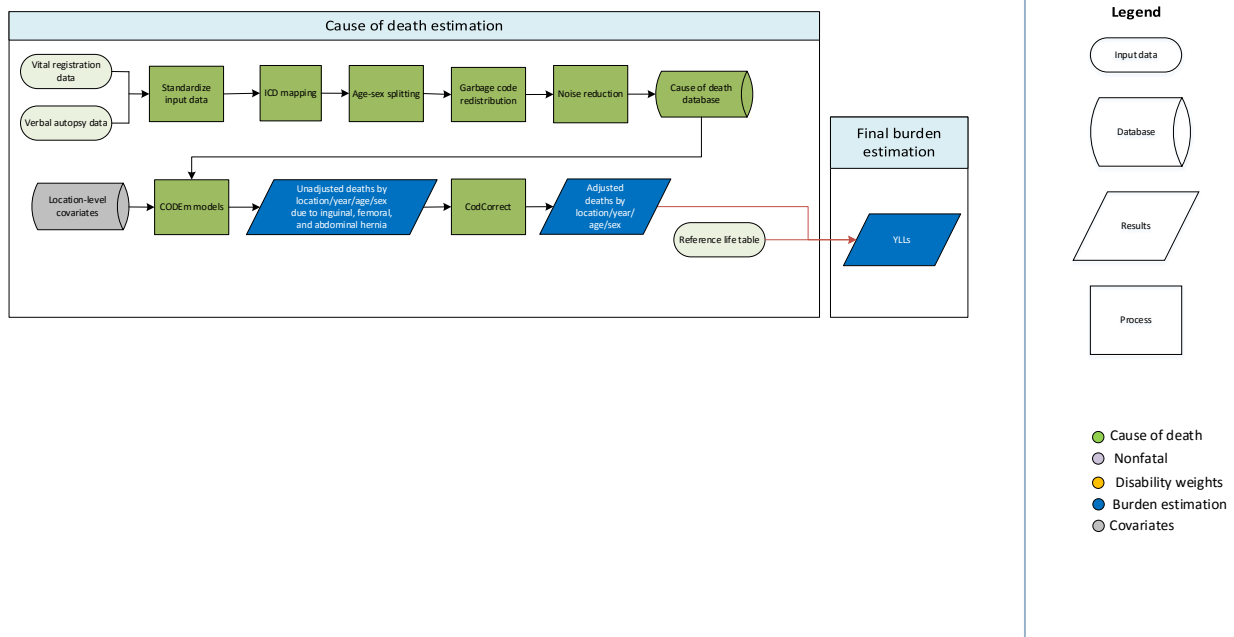

### Input data

Vital registration and verbal autopsy data were used to model this cause. We outliered data in instances where garbage code redistribution and noise reduction, in combination with small sample sizes, resulted in unreasonable cause fractions; and data that violated well-established time or age trends. Outliering methods were consistent across both vital registration and verbal autopsy data.

### Modelling strategy

We modelled deaths due to inguinal, femoral, and abdominal hernias with a standard CODEm model using the cause of death database and location-level covariates as inputs. The model followed standard parameters, with the exception that the start age of the model was 1 year old instead of 0 and the linear floor rate was lowered to 0.0001 in order to better capture low data. We hybridized separate global and data-rich models to acquire unadjusted results, which we finalized and adjusted using CodCorrect to reach final years of life lost (YLLs) due to inguinal, femoral, and abdominal hernias. In GBD 2016 we added the healthcare access and quality index (HAQI) covariate to the model.

| Covariate                           | Level | Direction |
|-------------------------------------|-------|-----------|
| Education (years per capita)        | 3     | -1        |
| Lag distributed income (per capita) | 3     | -1        |
| Sociodemographic index              | 3     | 0         |
| Health access and quality index     | 2     | -1        |

## Inflammatory Bowel Disease

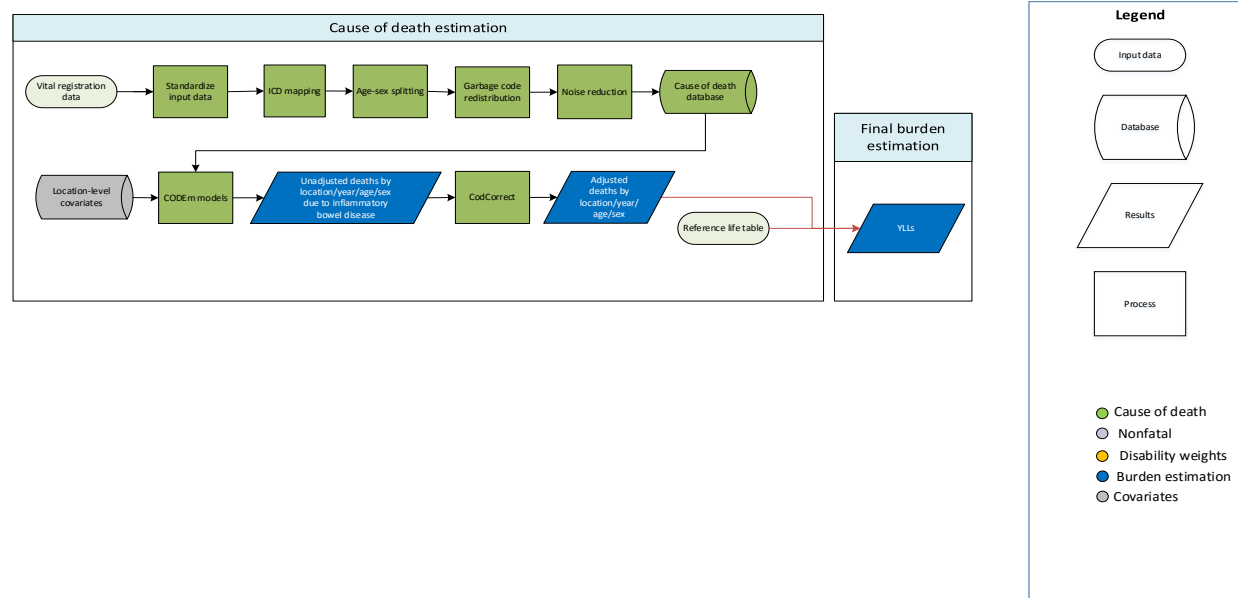

### Input data

Vital registration data were used to model this cause. We outliered data in instances where garbage code redistribution and noise reduction, in combination with small sample sizes, resulted in unreasonable cause fractions, and data that violated well-established time or age trends.

### Modelling strategy

We modelled deaths due to inflammatory bowel disease with a standard CODEm model using the cause of death database and location-level covariates as inputs. The model followed standard parameters, with the exception that the start age of the model was 1 year old instead of 0 and the linear floor rate was lowered to 0.0001 in order to better capture low data. We hybridized separate global and data-rich models to acquire unadjusted results, which we finalized and adjusted using CodCorrect to reach final years of life lost (YLLs) due to inflammatory bowel disease. In GBD 2016 we added the healthcare access and quality index (HAQI) covariate and replaced the animal fats (kcal per capita) with an updated saturated fats (adjusted percent) covariate.

| Covariate                           | Level | Direction |
|-------------------------------------|-------|-----------|
| Education (years per capita)        | 3     | -1        |
| Lag distributed income (per capita) | 3     | 0         |
| Latitude 15 to 30 (proportion)      | 2     | -1        |
| Latitude 30 to 45 (proportion)      | 2     | 1         |
| Latitude 45 plus (proportion)       | 2     | 1         |
| Sociodemographic index              | 3     | 0         |
| Fruits (grams adjusted)             | 1     | -1        |
| Red meats (grams adjusted)          | 1     | 1         |
| Saturated fats (adjusted percent)   | 1     | 1         |
| Vegetables (grams adjusted)         | -1    | -1        |
| Health access and quality index     | -1    | -1        |

## Vascular Intestinal Disorders

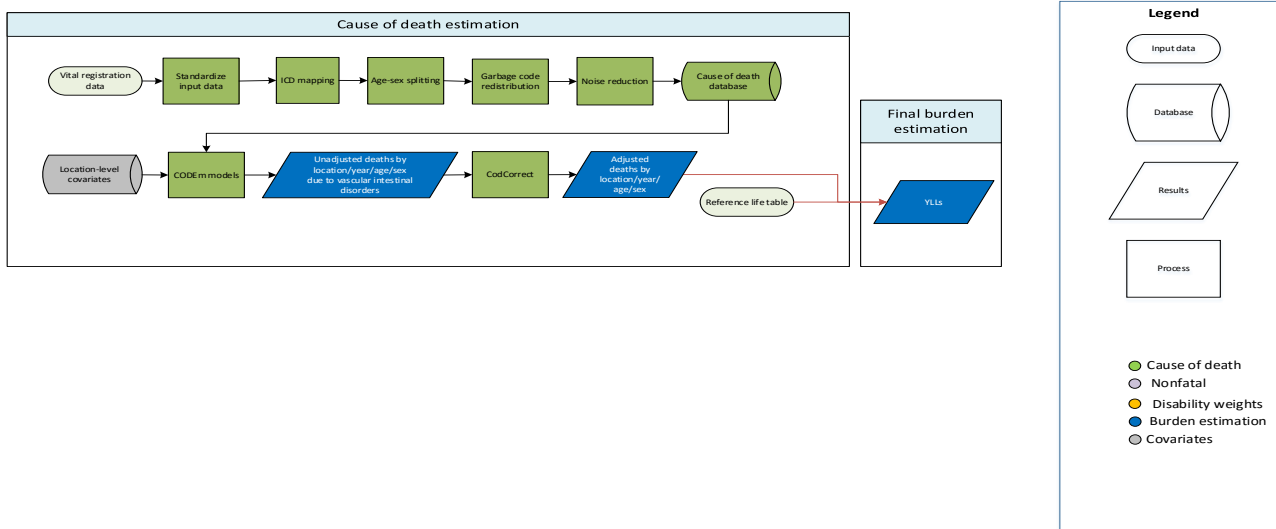

### Input data

Vital registration data were used to model this cause. We outliered data in instances where garbage code redistribution and noise reduction, in combination with small sample sizes, resulted in unreasonable cause fractions; and data that violated well-established time or age trends.

### Modelling strategy

We modelled deaths due to vascular intestinal disorders with a standard CODEm model using the cause of death database and location-level covariates as inputs. The model followed standard parameters, with the exception that the start age of the model was 1 year old instead of 0 and the linear floor rate was lowered to 0.0001 in order to better capture low data. We hybridized separate global and data-rich models to acquire unadjusted results, which we finalized and adjusted using CodCorrect to reach final years of life lost (YLLs) due to vascular intestinal disorders. In GBD 2016 we added the healthcare access and quality index (HAQI) covariate and replaced the animal fats (kcal per capita) covariate with an updated saturated fats (adjusted percent).

| Covariate                                     | Level | Direction |
|-----------------------------------------------|-------|-----------|
| Alcohol (liters per capita)                   | 2     | 1         |
| Diabetes fasting plasma glucose (mmol/L)      | 1     | 1         |
| Diabetes age specific prevalence (proportion) | 1     | 1         |
| Education (years per capita)                  | 3     | -1        |
| Lag distributed income (per capita)           | 3     | -1        |
| Cholesterol (mean)                            | 1     | 1         |
| Systolic blood pressure (mean)                | 1     | 1         |
| Latitude over 45 (proportion)                 | 3     | 1         |
| Sociodemographic index                        | 3     | 0         |
| Fruits (grams adjusted)                       | 2     | -1        |
| Saturated fats (adjusted percent)             | 1     | 1         |
| Vegetables (grams adjusted)                   | 2     | -1        |
| Health access and quality index               | 2     | -1        |

## Gallbladder and biliary diseases

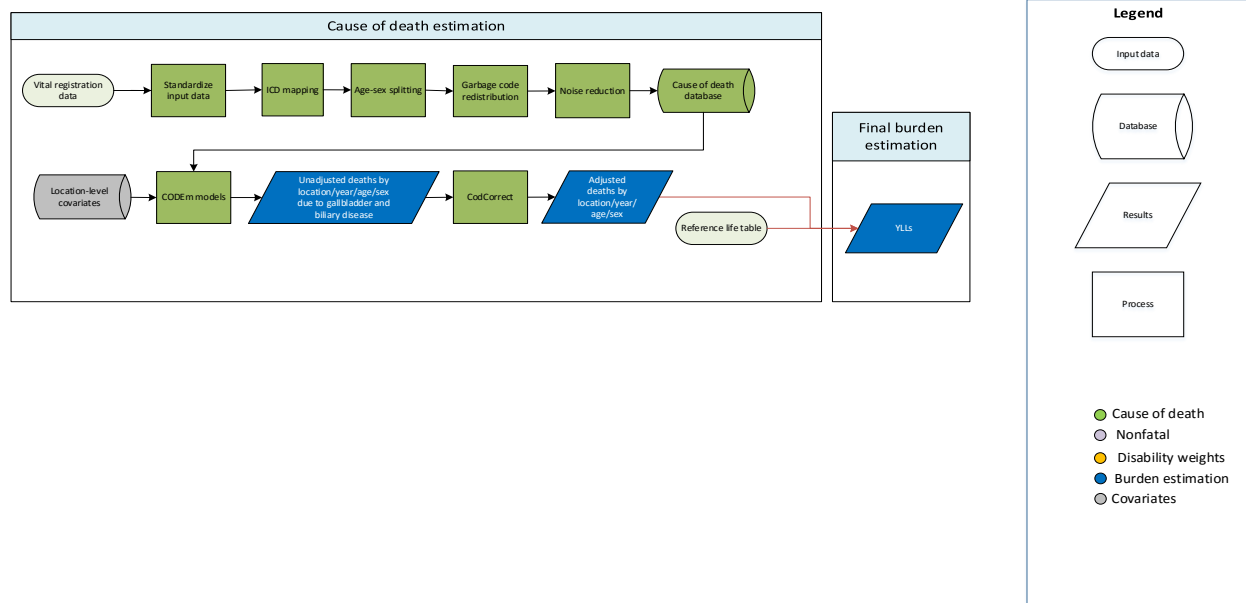

### Input data

Data used to estimate mortality of gallbladder and biliary diseases consisted of vital registration data from the cause of death (COD) database. We outliered data in instances where garbage code redistribution and noise reduction, in combination with small sample sizes, resulted in unreasonable cause fractions; and data that violated well-established time or age trends.

### Modelling strategy

We modelled deaths due to gallbladder and biliary diseases with a standard CODEm model using the cause of death database and location-level covariates as inputs. The model followed standard parameters, with the exception that the start age of the model was 1 year old instead of 0 and the linear floor rate was lowered to 0.0001 in order to better capture low data. We hybridized separate global and data-rich models to acquire unadjusted results, which we finalized and adjusted using CodCorrect to reach final years of life lost (YLLs) due to gallbladder and biliary diseases. In GBD 2016 we added the healthcare access and quality index (HAQI) covariate and replaced the animal fats (kcal per capita) covariate with an updated saturated fats (adjusted percent).

| Covariate                           | Level | Direction |
|-------------------------------------|-------|-----------|
| Alcohol (liters per capita)         | 2     | 1         |
| Education (years per capita)        | 3     | 0         |
| Lag distributed income (per capita) | 3     | 0         |
| Body mass index (mean)              | 1     | 1         |
| Population over 65 (proportion)     | 2     | 1         |
| Sociodemographic index              | 3     | 0         |
| Red meats (grams adjusted)          | 2     | 1         |
| Saturated fats (adjusted percent)   | 1     | 1         |
| Health access and quality index     | 2     | -1        |

## Pancreatitis

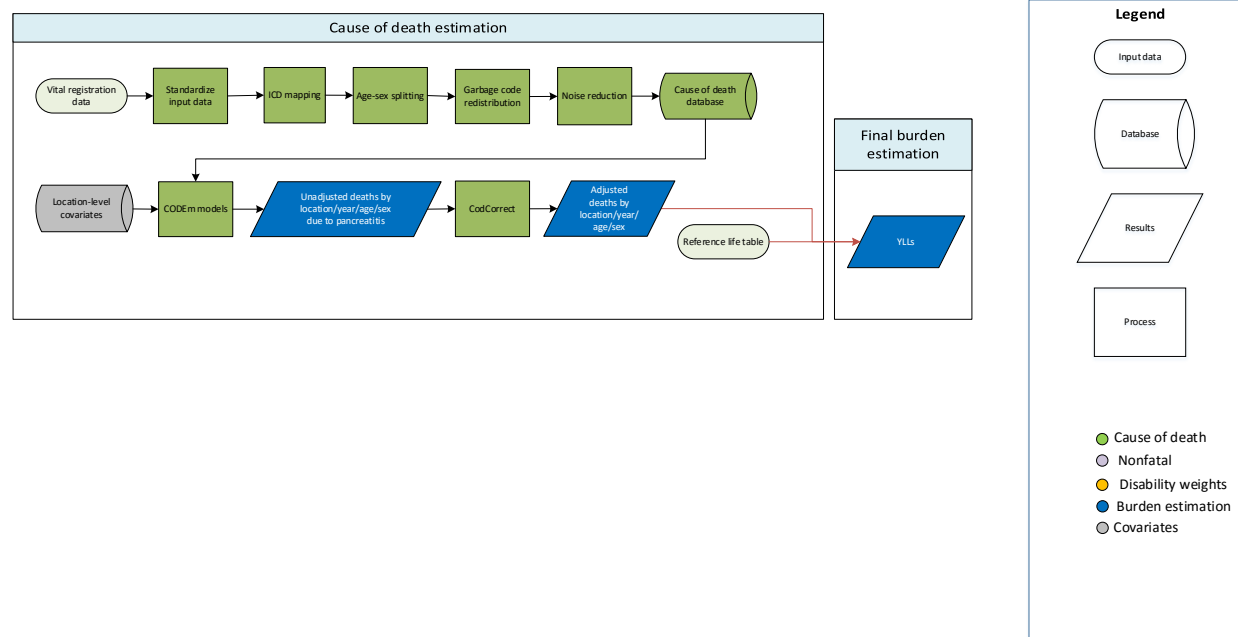

### Input data

Vital registration data were used to model this cause. We outliered data in instances where garbage code redistribution and noise reduction, in combination with small sample sizes, resulted in unreasonable cause fractions, and data that violated well-established time or age trends.

### Modelling strategy

We modelled deaths due to pancreatitis with a standard CODEm model using the cause of death database and location-level covariates as inputs. The model followed standard parameters, with the exception that the start age of the model was 1-year-old instead of 0 and the linear floor rate was lowered to 0.0001 in order to better capture low data. We hybridized separate global and data-rich models to acquire unadjusted results, which we finalized and adjusted using CodCorrect to reach final YLLs due to pancreatitis. In GBD 2016 we added the healthcare access and quality index (HAQI) covariate to the model.

| Covariate                                       | Level | Direction |
|-------------------------------------------------|-------|-----------|
| Alcohol (liters per capita)                     | 1     | 1         |
| Education (years per capita)                    | 3     | -1        |
| Lag distributed income (per capita)             | 3     | 0         |
| Body mass index (mean)                          | 2     | 1         |
| Pancreatitis scalar (summary exposure variable) | 1     | 1         |
| Sociodemographic index                          | 3     | 0         |
| Health access and quality index                 | 2     | -1        |

## Other digestive diseases

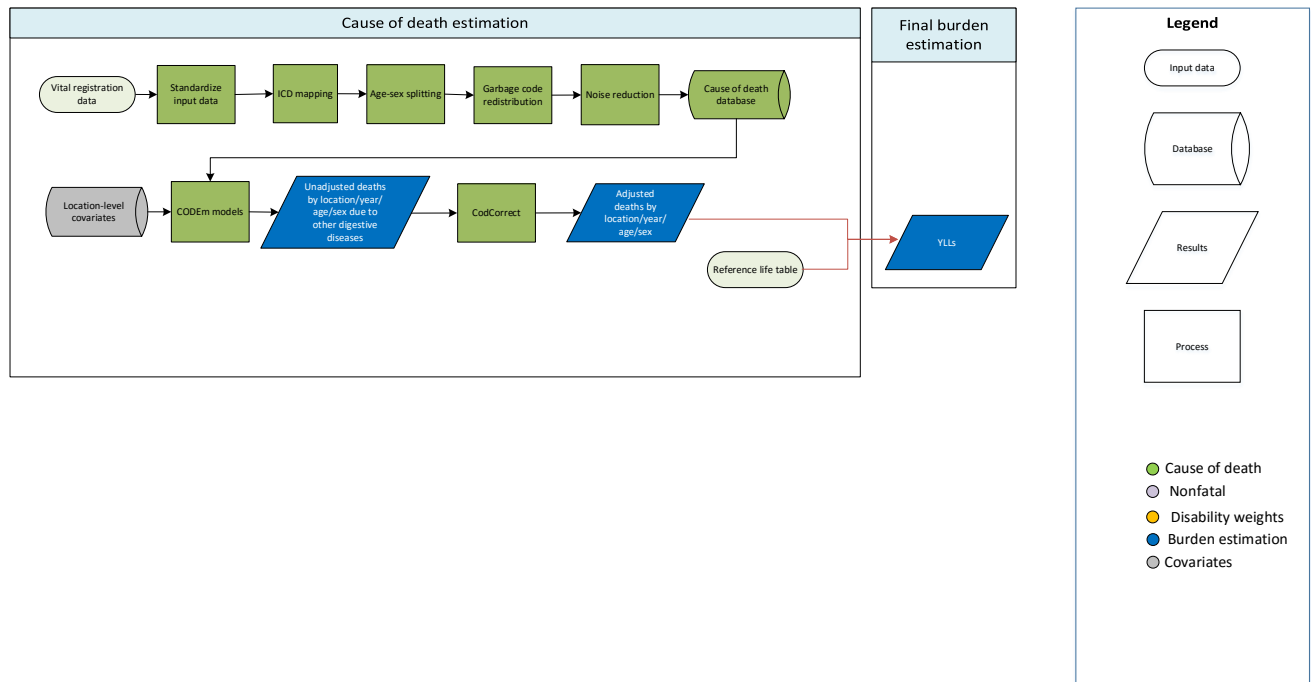

### Input data

Data used to estimate mortality due to other digestive diseases consisted of vital registration data from the cause of death (COD) database. We outliered data in instances where garbage code redistribution and noise reduction, in combination with small sample sizes, resulted in unreasonable cause fractions; and data that violated well-established time or age trends.

### Modelling strategy

We modelled deaths due to other digestive diseases with a standard CODEm model using the cause of death database and location-level covariates as inputs. The model followed standard parameters, with the exception that the start age of the model was 1 year old instead of 0. We hybridized separate global and data-rich models to acquire unadjusted results, which we finalized and adjusted using CodCorrect to reach final YLLs due to other digestive diseases.

There were no significant changes in the modelling process between GBD 2015 and GBD 2016.

| Covariate                                         | Level | Direction |
|---------------------------------------------------|-------|-----------|
| Alcohol (litres per capita)                       | 1     | 1         |
| Cumulative cigarettes (5 years)                   | 1     | 1         |
| Cumulative cigarettes (10 years)                  | 1     | 1         |
| Diabetes age-standardized prevalence (proportion) | 2     | 1         |
| Education (years per capita)                      | 3     | -1        |
| Health system access 2                            | 3     | -1        |
| Log LDI (I\$ per capita)                          | 3     | -1        |
| Mean BMI                                          | 2     | 1         |
| Sanitation (proportion with access)               | 2     | -1        |
| Smoking prevalence                                | 1     | 1         |



|                                                |   |    |
|------------------------------------------------|---|----|
| Improved water source (proportion with access) | 2 | -1 |
| Socio-demographic Index                        | 3 | 0  |
| Fruits adjusted (g)                            | 2 | -1 |
| Red meats adjusted (g)                         | 2 | 1  |
| Saturated fats adjusted (percentage)           | 2 | 1  |
| Vegetables adjusted (g)                        | 2 | 0  |
| Healthcare access and quality index            | 2 | -1 |

---

# Alzheimer’s Disease and Other Dementias

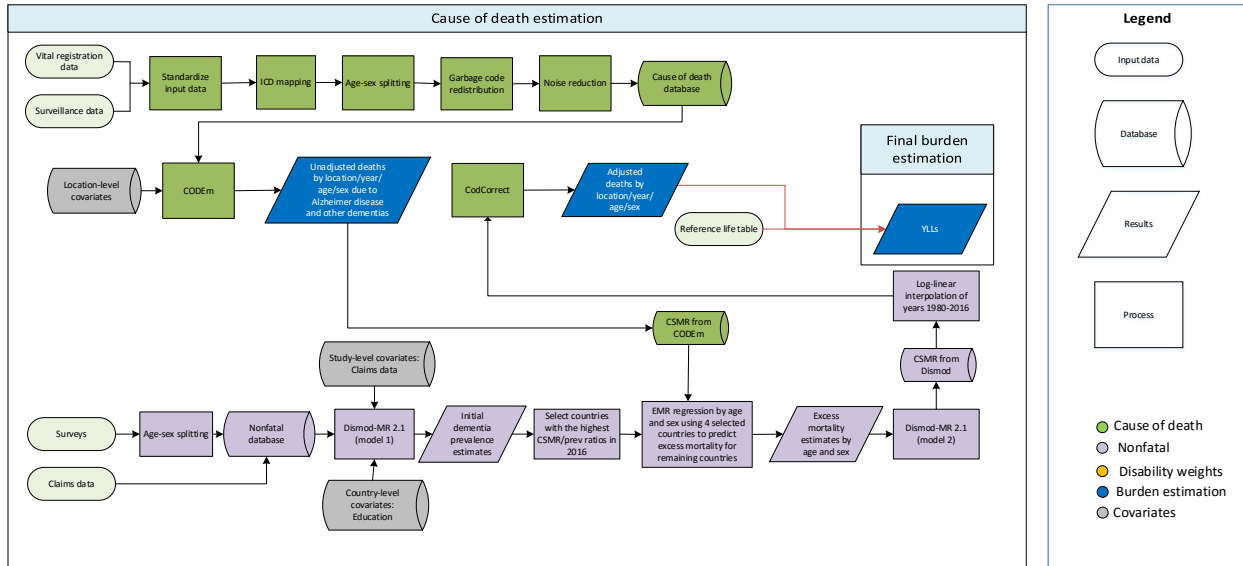

## Input Data

In GBD 2016, data used to estimate deaths due to Alzheimer’s disease and other dementias (dementias hereafter) included mortality data from vital registration systems and prevalence data from surveys and medical claims sources.

An updated systematic review was conducted from January 2015 to October 2016, and search terms<sup>1</sup> were set to capture studies for all dementia, including its sub-types. The search yielded 1,208 initial hits and 27 were marked for extraction. Inclusion criteria comprised studies that reported prevalence, incidence, remission rate, excess mortality rate, relative risk of mortality, standardized mortality ratio, or with-condition mortality rate. Studies with non-representative samples or no clearly defined sample were excluded. A flow chart documenting this review is displayed below.

<sup>1</sup> ((dementia[Title/Abstract]) AND ((incidence[Title/Abstract]) or (prevalence[Title/Abstract])) AND (“2015/01/23”[Date - Publication] : “3000”[Date - Publication]))

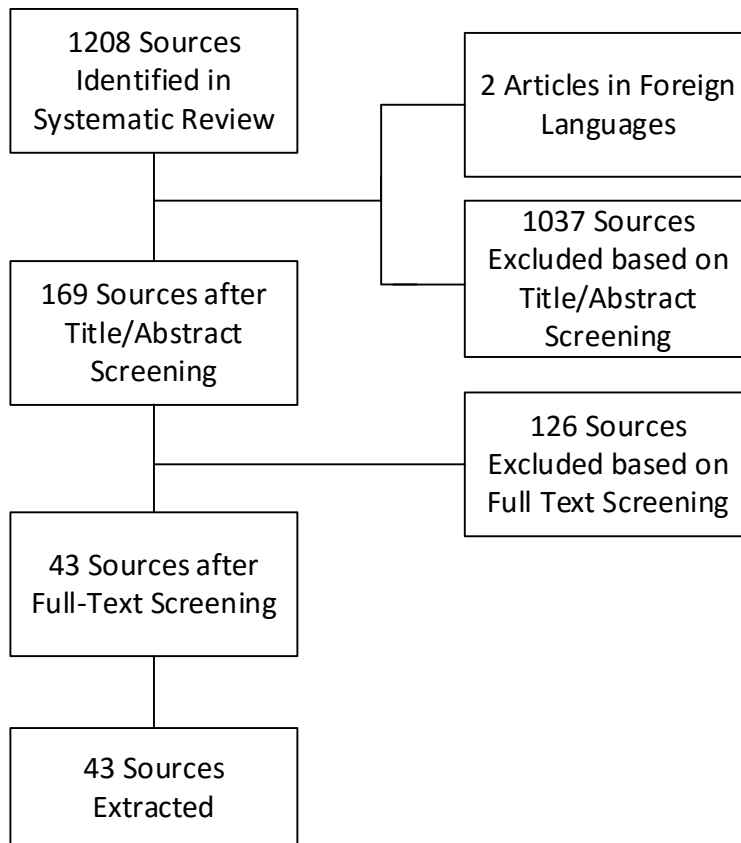

## Modelling Strategy

### Overview

Dementia mortality rates have increased more than five-fold since 1980 in high-quality vital registration systems such as in the US and Scandinavia. We have not seen an equivalent increase in prevalence and incidence data sources. If at all, there has been a modest decline in incidence and prevalence of dementia in studies in the UK and the US.<sup>2,3</sup> Also, the greater than 20-fold variation in mortality rates of dementia between countries is much greater than the four-fold difference in prevalence and incidence between countries. As it is unlikely that case fatality from dementia has dramatically increased over the time period and that it would differ by a very large margin between countries, the hypothesis is that certifying and coding practices have changed over time and at a different pace between countries. To avoid spurious large trends over time in the fatal component of the burden of dementia, we decided for GBD 2013 to make dementia mortality rates consistent with the most recent rates relative to prevalence of countries that are most likely to certify or code dementia as an underlying cause of death. This approach was applied again for GBD 2016, described further below.

<sup>2</sup> Akushevich I, Kravchenko J, Ukraintseva S, Arbeev K, Yashin AI. Time trends of incidence of age-associated diseases in the US elderly population: Medicare-based analysis. *Age and ageing*. 2013 Jul 1;42(4):494-500.

<sup>3</sup> Matthews FE, Arthur A, Barnes LE, Bond J, Jagger C, Robinson L, Brayne C, Medical Research Council Cognitive Function and Ageing Collaboration. A two-decade comparison of prevalence of dementia in individuals aged 65 years and older from three geographical areas of England: results of the Cognitive Function and Ageing Study I and II. *The Lancet*. 2013 Nov 1;382(9902):1405-12.

## Modelling steps

First, we ran a CODEm model for dementia and extracted the mortality rates by age, sex, and geography for 2016. The covariates used in this model are displayed below.

| Level | Covariate                                      | Direction |
|-------|------------------------------------------------|-----------|
| 1     | Diabetes age-specific proportion               | +         |
|       | Mean BMI                                       | +         |
|       | Cholesterol (total, mean per capita)           | +         |
|       | Systolic blood pressure (mmHg)                 | +         |
| 2     | Animal fats (kcal per capita)                  | +         |
|       | Latitude Over 45 (proportion)                  | +         |
|       | Red meat consumption adjusted (g)              | +         |
|       | Healthcare access and quality index            | -         |
| 3     | Education (years per capita)                   | -         |
|       | LDI per capita(I\$ per capita)                 | 0         |
|       | Sanitation (proportion with access             | -         |
|       | Improved water source (proportion with access) | -         |

Second, we ran a DisMod-MR 2.1 model with all data on incidence, prevalence, and mortality risk (RR, SMR, or with-condition mortality rates) and a setting of zero remission and extracted 2016 prevalence by age, sex, and geography. To account for potential systematic differences between US medical claims and survey data, we crosswalked for each year of claims data.

Third, we selected countries where the sum of cause-specific mortality rate to prevalence ratio for males and females exceeded 0.4 (excluding small island nations and those without vital registration). This resulted in choosing the United States, Sweden, Finland and Puerto Rico. The choice to pick fewer countries for this regression compared to GBD 2015, which used 30 countries in the EMR regression, was motivated by a desire to reduce the spread in EMR values, as countries used in the regression retain their original EMR values.

Fourth, we used a linear effects regression with dummies on age group and sex to predict excess mortality (ie, the ratio of cause-specific mortality rate and prevalence) by age and sex, the results of which are found in the tables below.

**Table: Fixed effect coefficients of EMR regression. Outcome: ln(EMR)**

| Independent variables | Coef   | Std. error | P value | 95% Confidence Interval |        |
|-----------------------|--------|------------|---------|-------------------------|--------|
| Male                  | 0.331  | 0.056      | 0.000   | 0.222                   | 0.440  |
| Age 40-59             | -3.34  | 0.118      | 0.000   | -3.571                  | -3.109 |
| Age 60-64             | -2.693 | 0.118      | 0.000   | -2.924                  | -2.462 |
| Age 65-69             | -2.448 | 0.118      | 0.000   | -2.679                  | -2.217 |
| Age 70-74             | -2.113 | 0.118      | 0.000   | -2.344                  | -1.882 |
| Age 75- 80            | -1.738 | 0.118      | 0.000   | -1.969                  | -1.507 |
| Age 80-84             | -1.385 | 0.118      | 0.000   | -1.616                  | -1.154 |
| Age 85-89             | -0.974 | 0.118      | 0.000   | -1.205                  | -0.743 |
| Age 90-94             | -0.457 | 0.118      | 0.000   | -0.688                  | -0.226 |
| Constant              | -1.802 | 0.088      | 0.000   | -1.974                  | -1.630 |

**Table: Predicted EMR values by age and sex (95% CI)**

|            | Male                  | Female                |
|------------|-----------------------|-----------------------|
| Age 40-59  | 0.008 (0.007 - 0.01)  | 0.006 (0.005 - 0.007) |
| Age 60-64  | 0.016 (0.013 - 0.019) | 0.011 (0.009 - 0.013) |
| Age 65-69  | 0.02 (0.017 - 0.024)  | 0.014 (0.012 - 0.017) |
| Age 70-74  | 0.028 (0.024 - 0.033) | 0.02 (0.017 - 0.024)  |
| Age 75- 80 | 0.04 (0.034 - 0.048)  | 0.029 (0.025 - 0.034) |
| Age 80-84  | 0.057 (0.048 - 0.068) | 0.042 (0.035 - 0.048) |
| Age 85-89  | 0.087 (0.074 - 0.104) | 0.063 (0.053 - 0.074) |
| Age 90-94  | 0.146 (0.123 - 0.173) | 0.104 (0.088 - 0.123) |
| Age 95+    | 0.23 (0.193 - 0.274)  | 0.166 (0.14 - 0.196)  |

Fifth, these estimates were added to a second DisMod-MR 2.1 model as pertaining to the full 1990–2016 estimation period. For the four countries included in the regression, we retained their age- and sex-specific ratios and entered those also as pertaining to the full 1990–2016 estimation period. Age-standardized years of education was used as a country-level covariate. We excluded data for standardized mortality ratio, with-condition mortality rate, and relative risk as we wanted to estimate cause-specific mortality rates that were consistent with the level of excess mortality from the four chosen countries in 2016.

Sixth, we took the predictions of cause-specific mortality by age, sex, geography, and year that DisMod-MR 2.1 calculated as being consistent with the data on incidence, prevalence, and the priors on excess mortality from step five.

Seventh, because DisMod-MR 2.1 produces estimates in five-year intervals only, we expanded the time series by log-linear interpolation. Values for 1980-1990 were generated using a regression on the entire time series with Socio-demographic index included as a predictor.

Lastly, before adding the dementia mortality estimates into CodCorrect, we proportionately retrieved the difference in deaths between those estimated in CODEm and those estimated in step 7 from a set of ‘target causes’ which were identified as causes of death in cohort studies of persons with dementia. The

target causes included lower respiratory infections, protein-energy malnutrition, other nutritional deficiencies, cerebrovascular disease, interstitial nephritis and urinary tract infections, decubitus ulcer, and pulmonary aspiration and foreign body in airway.<sup>4 5 6 7</sup> More information on this process is located in section 4 of the appendix.

<sup>4</sup> Brunnström HR, Englund EM. Cause of death in patients with dementia disorders. *European journal of neurology*. 2009 Apr 1;16(4):488-92.

<sup>5</sup> Thomas BM, Starr JM, Whalley LJ. Death certification in treated cases of presenile Alzheimer's disease and vascular dementia in Scotland. *Age and Ageing*. 1997 Sep 1;26(5):401-6.

<sup>6</sup> Todd S, Barr S, Roberts M, Passmore AP. Survival in dementia and predictors of mortality: a review. *International journal of geriatric psychiatry*. 2013 Nov 1;28(11):1109-24.

<sup>7</sup> Keene J, Hope T, Fairburn CG, Jacoby R. Death and dementia. *International journal of geriatric psychiatry*. 2001 Oct 1;16(10):969-74.

## Parkinson Disease

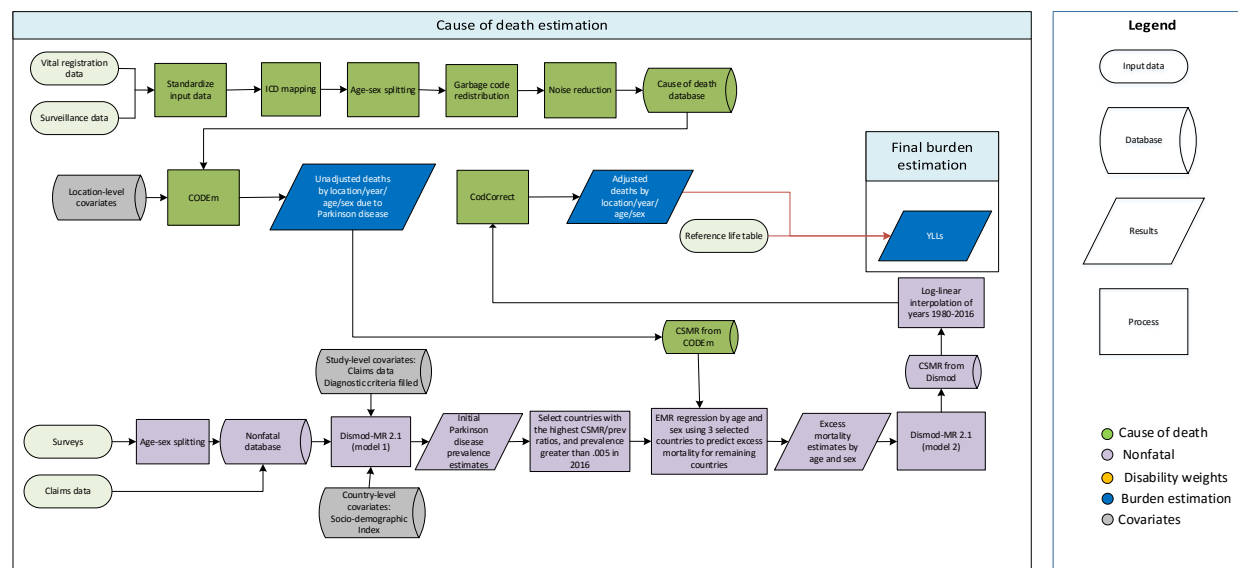

### Input Data

In GBD 2016, data used to estimate deaths due to Parkinson disease included mortality data from vital registration systems and prevalence data from surveys and claims sources.

An updated systematic review was conducted from January 2011 to December 2015, and search terms<sup>1</sup> were set to capture studies for Parkinson disease. The search yielded 1,433 initial hits and 17 were marked for extraction. Inclusion criteria comprised studies that reported prevalence, incidence, remission rate, excess mortality rate, relative risk of mortality, standardized mortality ratio, or with-condition mortality rate. Studies with no clearly defined sample or that drew from specific clinic/patient organizations were excluded.

### Modelling Strategy

#### Overview

Parkinson's disease mortality rates have more than doubled since 1980 in high-quality vital registration systems such as in the US, Canada, Australia, France, Germany, the United Kingdom and Finland, while other European countries like the Netherlands, Sweden, and Norway have not seen such increases over time. We have not seen an equivalent increase in prevalence and incidence data sources. Additionally, the greater than 15-fold variation in mortality rates of Parkinson disease between countries is much greater the three-fold difference in prevalence and incidence between high-income countries. As it is unlikely that case fatality from Parkinson disease has dramatically increased over the time period and that it would differ by a very large margin between countries, the hypothesis is that certifying and coding practices have changed over time and at a different pace between countries. Therefore, for GBD 2016 we decided to employ a modelling strategy which we have previously used to model mortality

<sup>1</sup> (((((Parkinson disease AND epidemiology) AND ( "2011/01/01"[PDat] : "2015/12/31"[PDat] ))) AND ((Parkinson disease AND epidemiology))))

from Alzheimer disease and other dementias. This modelling process avoids spurious large trends over time in the fatal component of the burden of dementia by making dementia mortality rates consistent with the rates observed in 2016 relative to prevalence in countries that are most likely to certify or code Parkinson disease as an underlying cause of death.

#### Modelling steps

First, we ran a CODEm model for Parkinson disease and extracted the mortality rates by age, sex, and geography for 2016.

Second, we ran a DisMod-MR 2.1 model with all data on incidence, prevalence, and mortality risk (RR, SMR, or with-condition mortality rates) and a setting of zero remission and extracted 2016 prevalence by age, sex, and geography. To account for potential systematic differences between claims and survey data, we crosswalked for each year of claims data.

Third, we selected the three countries (United States, Finland, and Austria) with the highest cause-specific mortality rate (from step 1) to prevalence (from step 2) ratio in 2016, which also had an age-standardised prevalence rate greater than 0.0005, and a population greater than 1 million.

Fourth, we used a linear effects regression with dummies on age group and sex to predict excess mortality (i.e., the ratio of cause-specific mortality rate and prevalence) by age and sex, the results of which are found in the tables below.

**Table:** Fixed effect coefficients of EMR regression. Outcome: ln(EMR)

| Independent variables | Coef   | Std. error | P value | 95% Confidence Interval |        |
|-----------------------|--------|------------|---------|-------------------------|--------|
| Male                  | 0.214  | 0.074      | 0.006   | 0.069                   | 0.359  |
| Age 40-59             | -3.522 | 0.157      | 0.000   | -3.829                  | -3.214 |
| Age 60-64             | -2.716 | 0.157      | 0.000   | -3.024                  | -2.409 |
| Age 65-69             | -2.236 | 0.157      | 0.000   | -2.544                  | -1.929 |
| Age 70-74             | -1.686 | 0.157      | 0.000   | -1.993                  | -1.378 |
| Age 75- 80            | -1.194 | 0.157      | 0.000   | -1.502                  | -0.887 |
| Age 80-84             | -0.779 | 0.157      | 0.000   | -1.087                  | -0.471 |
| Age 85-89             | -0.493 | 0.157      | 0.003   | -0.800                  | -0.185 |
| Age 90-94             | -0.203 | 0.157      | 0.202   | -0.511                  | 0.104  |
| Constant              | -2.097 | 0.117      | 0.000   | -2.326                  | -1.867 |

**Table:** Predicted EMR values by age and sex (95% CI)

|            | Male                  | Female                |
|------------|-----------------------|-----------------------|
| Age 40-59  | 0.005 (0.004 - 0.006) | 0.004 (0.003 - 0.005) |
| Age 60-64  | 0.01 (0.008 - 0.013)  | 0.008 (0.006 - 0.01)  |
| Age 65-69  | 0.016 (0.013 - 0.02)  | 0.013 (0.01 - 0.016)  |
| Age 70-74  | 0.028 (0.023 - 0.035) | 0.023 (0.018 - 0.029) |
| Age 75- 80 | 0.047 (0.037 - 0.059) | 0.037 (0.029 - 0.046) |
| Age 80-84  | 0.071 (0.055 - 0.089) | 0.057 (0.045 - 0.07)  |
| Age 85-89  | 0.093 (0.073 - 0.117) | 0.076 (0.06 - 0.093)  |
| Age 90-94  | 0.126 (0.099 - 0.155) | 0.101 (0.08 - 0.127)  |
| Age 95+    | 0.154 (0.122 - 0.191) | 0.123 (0.097 - 0.153) |



Fifth, these estimates were added to a second DisMod-MR 2.1 model as pertaining to the full 1990–2016 estimation period. For the three countries included in the regression, we retained their age- and sex-specific ratios and entered those also as pertaining to the full 1990–2016 estimation period.

Sixth, we took the predictions of cause-specific mortality by age, sex, geography, and year that DisMod-MR 2.1 calculated as being consistent with the data on incidence, prevalence, and the priors on excess mortality from step five. Socio-demographic Index was used as a country-level covariate. We excluded data for standardized mortality ratio, with-condition mortality rate, and relative risk as we wanted to estimate cause-specific mortality rates that were consistent with the level of excess mortality from the three chosen countries in 2016.

Seventh, because DisMod-MR 2.1 only produces estimates in five-year intervals, we expanded the time series by log-linear interpolation. Values for 1980-1990 were generated using a regression on the entire time series with Socio-demographic index included as a predictor.

Lastly, before adding the Parkinson mortality estimates into CodCorrect, we proportionately retrieved the difference in deaths between those estimated in CODEm and those estimated in step 7 from a set of ‘target causes’ which were identified as causes of death in cohort studies of persons with dementia. We assumed the same target causes for dementia would apply to Parkinson disease as well. The target causes included lower respiratory infections, protein-energy malnutrition, other nutritional deficiencies, cerebrovascular disease, interstitial nephritis and urinary tract infections, decubitus ulcer, and pulmonary aspiration and foreign body in airway.<sup>2 3 4 5</sup> More information on this process is located in section 4 of the appendix.

<sup>2</sup> Brunström HR, Englund EM. Cause of death in patients with dementia disorders. *European journal of neurology*. 2009 Apr 1;16(4):488-92.

<sup>3</sup> Thomas BM, Starr JM, Whalley LJ. Death certification in treated cases of presenile Alzheimer's disease and vascular dementia in Scotland. *Age and Ageing*. 1997 Sep 1;26(5):401-6.

<sup>4</sup> Todd S, Barr S, Roberts M, Passmore AP. Survival in dementia and predictors of mortality: a review. *International journal of geriatric psychiatry*. 2013 Nov 1;28(11):1109-24.

<sup>5</sup> Keene J, Hope T, Fairburn CG, Jacoby R. Death and dementia. *International journal of geriatric psychiatry*. 2001 Oct 1;16(10):969-74.

# Epilepsy

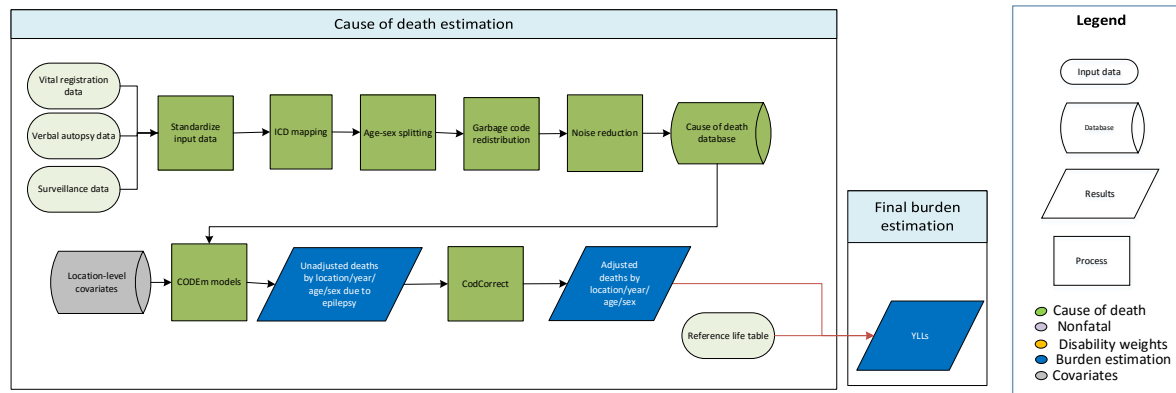

## Input data

Data used to estimate epilepsy mortality included vital registration (VR), verbal autopsy, and China mortality surveillance data from the cause of death (COD) database. Our outlier criteria were to exclude data points that were (1) implausibly high or low relative to global or regional patterns, (2) substantially conflicted with established age or temporal patterns, or (3) significantly conflicted with other data sources based from the same locations or locations with similar characteristics (i.e., socio-demographic index).

Based on these criteria, we excluded ICD-9 BTL data for Sri Lanka, Fiji, and Kiribati as the estimates varied from year to year between zero and high values. We also excluded the Survey of Causes of Death Data and Medical Certification of Cause of Death Data for India, as these data types were not consistent with the Sample Registration System Data and would have led to discontinuities in our estimates over time.

## Modelling strategy

The standard CODEm modelling approach was applied to estimate deaths due to epilepsy. Separate models were conducted for male and female mortality, and the age range for both models was 28 days–95+ years. For GBD 2016, the health systems access covariate was replaced with the health access and quality index covariate. There were no other substantial changes for GBD 2016. The covariates used are displayed below.

| Level | Covariate                              | Direction |
|-------|----------------------------------------|-----------|
| 1     | pig meat consumption (kcal per capita) | +         |
|       | pigs (per capita)                      | +         |
|       | SEV scalar: epilepsy                   | +         |
|       | mean systolic blood pressure (mmHg)    | +         |
| 2     | health access and quality index        | -         |
|       | mean body mass index                   | +         |
|       | mean serum total cholesterol (mmol/L)  | +         |

|   |                                  |   |
|---|----------------------------------|---|
| 3 | cumulative cigarettes (10 years) | + |
|   | cumulative cigarettes (5 years)  | + |
|   | education (years per capita)     | - |
|   | log LDI (per capita)             | - |
|   | Socio-demographic Index          | - |

## Multiple Sclerosis

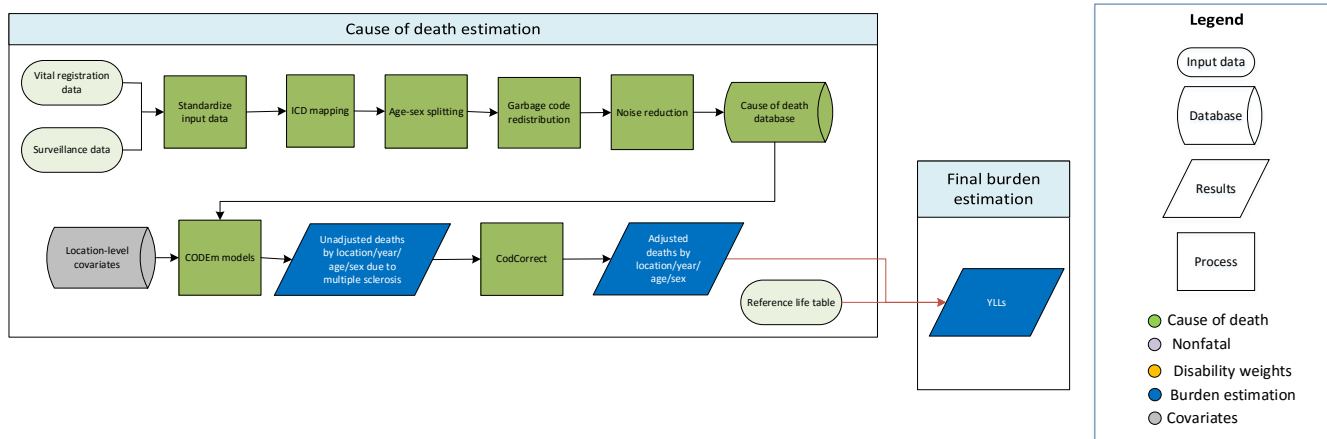

### Input data

Data used to estimate multiple sclerosis included vital registration and surveillance data from the cause of death (COD) database. Our outlier criteria were to exclude data points that (1) were implausibly high or low, (2) substantially conflicted with established age or temporal patterns, or (3) significantly conflicted with other data sources conducted from the same locations or locations with similar characteristics (ie, Socio-demographic Index).

### Modelling strategy

The standard CODEm modelling approach was used to estimate deaths due to multiple sclerosis. Separate models were conducted for male and female mortality, and the age range for both models was 20–95+ years. For GBD 2016, the health system access covariate was replaced by the new health care access and quality index covariate. Otherwise, there were no substantial changes from GBD 2015. The covariates used are displayed below.

| Level | Covariate                                | Direction |
|-------|------------------------------------------|-----------|
| 1     | absolute value of average latitude       | +         |
| 2     | animal fat consumption (kcal per capita) | +         |
|       | mean serum total cholesterol (mmol/L)    | +         |
|       | health care access and quality index     | -         |
| 3     | cumulative cigarettes (10 years)         | +         |
|       | cumulative cigarettes (5 years)          | +         |
|       | education (years per capita)             | -         |
|       | log-transformed LDI (per capita)         | -         |
|       | smoking prevalence                       | +         |
|       | Socio-demographic Index                  | +         |

## Motor Neuron Disease

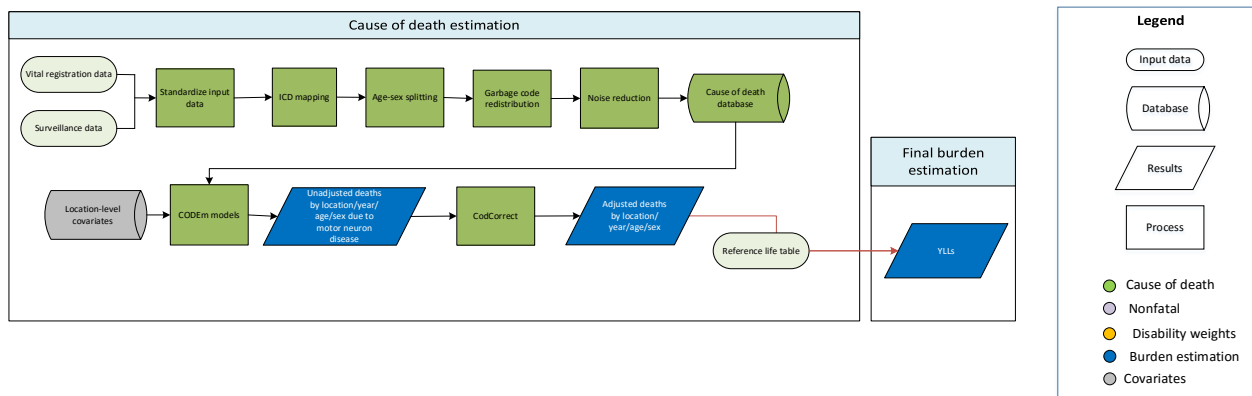

### Input data

Data used to estimate motor neuron disease mortality included vital registration and surveillance data from the cause of death (COD) database. Our outlier criteria excluded data points that (1) were implausibly high or low, (2) substantially conflicted with established age or temporal patterns, or (3) significantly conflicted with other data sources conducted from the same locations or locations with similar characteristics (ie, Socio-demographic Index).

### Modelling strategy

The standard CODEm modelling approach was used to estimate deaths due to multiple sclerosis. Separate models were conducted for male and female mortality, and the age range for both models was 20–95+ years. For GBD 2016, the fruit intake per capita covariate was adjusted to reflect intake per 2,000 kcal per day diet. Additionally, the health system access covariate was replaced by the health care access and quality index covariate. There were no other substantial changes from the GBD 2015 modelling strategy. The covariates used are displayed below.

| Level | Covariate                                      | Direction |
|-------|------------------------------------------------|-----------|
| 1     | asbestos production (kg per capita)            | +         |
|       | mean serum total cholesterol (mmol/L)          | 0         |
|       | fruit consumption (grams per day adjusted)     | 0         |
| 2     | absolute value of average latitude             | +         |
|       | sanitation (proportion with access)            | 0         |
|       | improved water source (proportion with access) | 0         |
|       | health care access and quality index           | -         |
| 3     | education (years per capita)                   | 0         |
|       | log-transformed LDI (per capita)               | 0         |
|       | Socio-demographic Index                        | 0         |

## Other Neurological Disorders

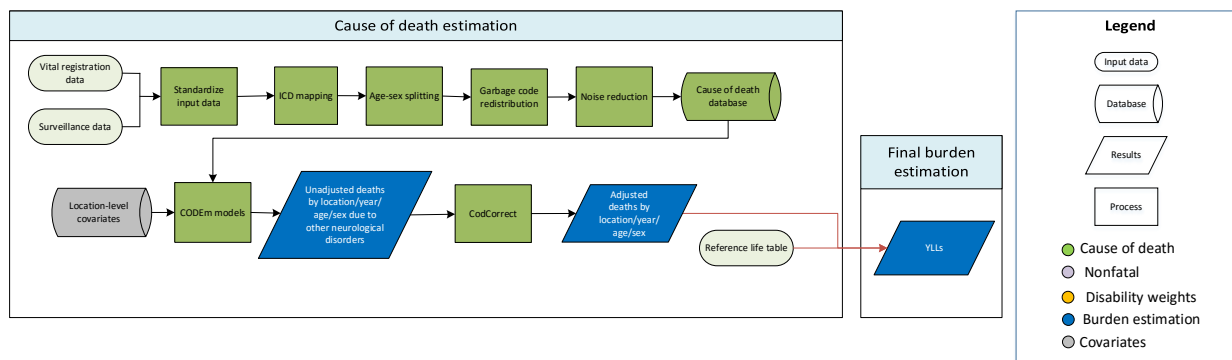

### Input data

Data used to estimate other neurological disorders included vital registration and surveillance data from the cause of death (COD) database. Our outlier criteria were to exclude data points that (1) were implausibly high or low, (2) substantially conflicted with established age or temporal patterns, or (3) significantly conflicted with other data sources conducted from the same locations or locations with similar characteristics (ie, Socio-demographic Index).

### Modelling strategy

The standard CODEm modelling approach was applied to estimate deaths due to other neurological disorders. Male and female CODEm models were run for deaths occurring between ages 28 days to 95+ years. For GBD 2016, the fruit and meat intake per capita covariates were adjusted to reflect intake per 2,000 kcal per day diet. Additionally, the covariate health system access was replaced with the health care access and quality index. There were no other significant changes from the GBD 2015 modelling strategy. The covariates used are displayed below.

| Level | Covariate                                              | Direction |
|-------|--------------------------------------------------------|-----------|
| 1     | underweight proportion was under 2 standard deviations | +         |
|       | mean body mass index                                   | +         |
|       | mean cholesterol                                       | +         |
|       | mean systolic blood pressure                           | +         |
|       | pig meat consumption (kcal per capita)                 | +         |
| 2     | alcohol (litres per capita)                            | +         |
|       | animal fat consumption (kcal per capita)               | +         |
|       | health care access and quality index                   | -         |
|       | fruit consumption adjusted                             | -         |
|       | population density over 1,000 per square kilometer pct | +         |
|       | red meat consumption adjusted                          | +         |
| 3     | cumulative cigarette consumption (10 years)            | +         |
|       | cumulative cigarette consumption (5 years)             | +         |
|       | education (years per capita)                           | -         |
|       | log-transformed LDI (per capita)                       | -         |
|       | smoking prevalence                                     | +         |

|  |                         |   |
|--|-------------------------|---|
|  | Socio-demographic Index | 0 |
|--|-------------------------|---|

## Alcohol Use Disorders

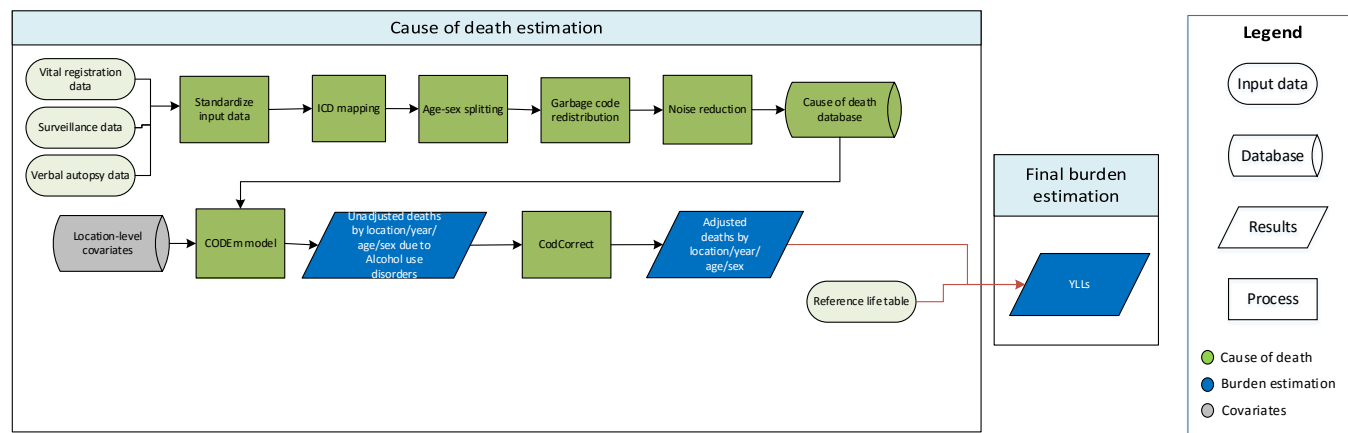

### Input data

All data were from vital registration, China surveillance, and verbal autopsy sources. Some data were outliered from countries with sparse yet heterogeneous data if it created implausible fluctuations in deaths and regional patterns. As an example, Medical Certification of Cause of Death data from India was excluded for alcohol use disorders due to the extremely low estimates.

### Modelling strategy

Cause of death modelling for alcohol use disorders followed the general CODEm strategy. There were no substantial changes from GBD 2015. Model covariate inclusion was based on empirical evidence and expert feedback which resulted in a set of model covariates that reflected alcohol consumption, smoking, education, health system access, percent of population Muslim, domestic income, and Socio-demographic Index (SDI).

**Table: covariates used in alcohol use CODEm model**

| Level | Covariate                               | Direction |
|-------|-----------------------------------------|-----------|
| 1     | alcohol consumption (litres per capita) | +         |
|       | alcohol binge drinking                  | +         |
| 2     | Muslim religion                         | -         |
|       | cumulative cigarettes (10 years)        | 0         |
|       | smoking prevalence                      | 0         |
|       | health care access and quality index    | -         |
| 3     | log LDI (I\$ per capita)                | -         |
|       | education (years per capita)            | -         |
|       | Socio-demographic Index                 | 0         |



A significant limitation to previous alcohol use models was assumptions surrounding the redistribution of garbage codes. In GBD 2016, ICD codes for accidental poisoning (X40-44) were redistributed to the underlying GBD cause (substance use disorder) using an algorithm devised from analyzing national registry data from several countries and expert feedback. This is an improvement on the alcohol use model from previous rounds of GBD.

## Drug use disorders

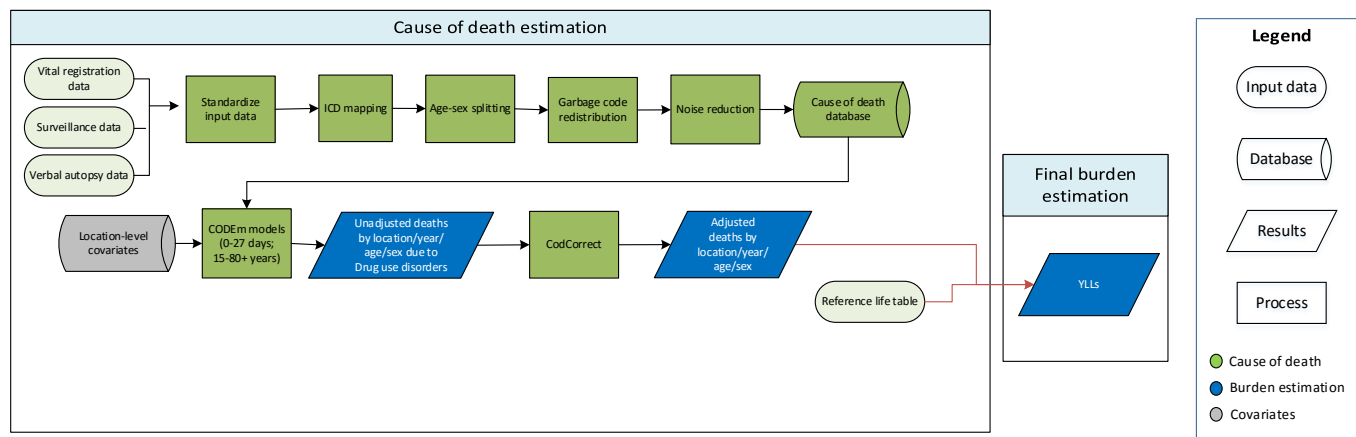

### Input data

All data were from vital registration, verbal autopsy and surveillance sources. Data from countries with sparse yet heterogeneous data were also excluded as the data exaggerated fluctuations in deaths and gave implausible regional patterns. Excluded data were typically from developing countries. Notably, a considerable amount of Medical Certification of Cause of Death (MCCD) data from India was excluded for drug use disorders. Specifically, it was decided to remove the MCCD ICD-9 data as a specific garbage redistribution package was not available for that time series. Additionally, it was decided to remove MCCD-ICD10 data from the Northeastern states of Meghalaya, Mizoram, Nagaland and Manipur (where the the much lower values in MCCD compared to SRS removed the expected higher death rates there) and also from the four states of Punjab, Uttarakhand, Jharkand and Karnataka (where the raw data are showed almost no deaths from drug use disorders).

### Modelling strategy

Cause of death modelling for drug use disorders followed the general CODEm strategy. In GBD 2016 additional geographies were included and age groups were extended beyond 80+. For GBD 2016, the health systems access covariate was replaced with the health care access and quality index covariate

**Table: covariates used in drug use disorders CODEm model**

| Level | Covariate                            | Direction |
|-------|--------------------------------------|-----------|
| 1     | alcohol use (litres per capita)      | +         |
|       | cumulative cigarettes (10 years)     | +         |
|       | cumulative cigarettes (5 years)      | +         |
|       | opium cultivation bin                | +         |
|       | smoking prevalence                   | +         |
| 2     | health care access and quality index | -         |

|   |                              |   |
|---|------------------------------|---|
| 3 | log LDI (I\$ per capita)     | 0 |
|   | education (years per capita) | 0 |
|   | Socio-demographic Index      | 0 |

The drug use model is the parent model of all other drug use causes (ie, amphetamine, cocaine, opioid, and other drug). It forms an envelope into which all four individual drug use models are squeezed during the CoDCorrect process.

A significant limitation to previous drug use models was assumptions surrounding the redistribution of garbage codes. In GBD 2016, ICD codes for accidental poisoning (X40-44) were redistributed to the underlying GBD cause (substance use disorder) using an algorithm devised from analyzing national registry data from several countries and expert feedback. This is an improvement on the drug use model from previous rounds of GBD and we plan to refine that further in future iterations of GBD. There were no other substantial changes from GBD 2015.

## Opioid dependence

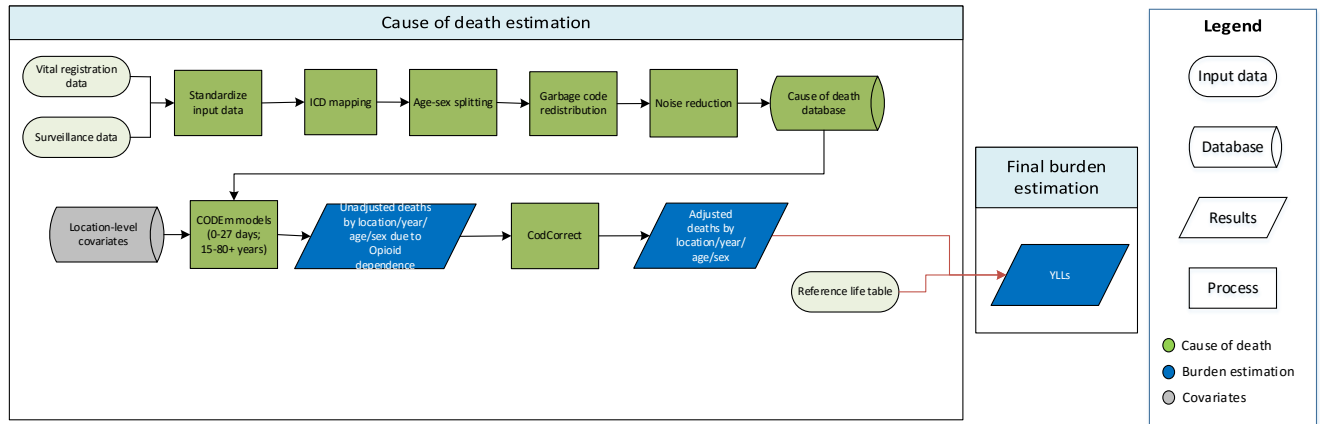

### Input data

All data were from vital registration and surveillance sources. Data from countries with sparse yet heterogeneous data were also excluded as the data exaggerated fluctuations in deaths and gave implausible regional patterns. Excluded data were typically from developing countries.

### Modelling strategy

Cause of death modelling for opioid use followed the general CODEm strategy. In GBD 2016 additional geographies were included and age groups were extended beyond 80+. For GBD 2016, the health systems access covariate was replaced with the health care access and quality index covariate.

**Table: covariates used in opioid use CODEm model**

| Level | Covariate                            | Direction |
|-------|--------------------------------------|-----------|
| 1     | alcohol (litres per capita)          | +         |
|       | cumulative cigarettes (10 years)     | +         |
|       | cumulative cigarettes (5 years)      | +         |
|       | opium cultivation bin                | +         |
|       | smoking prevalence                   | +         |
| 2     | health care access and quality index | -         |
| 3     | log LDI (I\$ per capita)             | 0         |
|       | education (years per capita)         | 0         |
|       | Socio-demographic Index              | 0         |

A significant limitation to previous opioid use models was assumptions surrounding the redistribution of garbage codes. In GBD 2016, ICD codes for accidental poisoning (X40-44) were redistributed to the underlying GBD cause (substance use disorder) using an algorithm devised from analyzing national registry data from several countries and expert feedback. This is an improvement on the opioid use model from previous rounds of GBD. There were no other substantial changes from GBD 2015.

## Cocaine Dependence

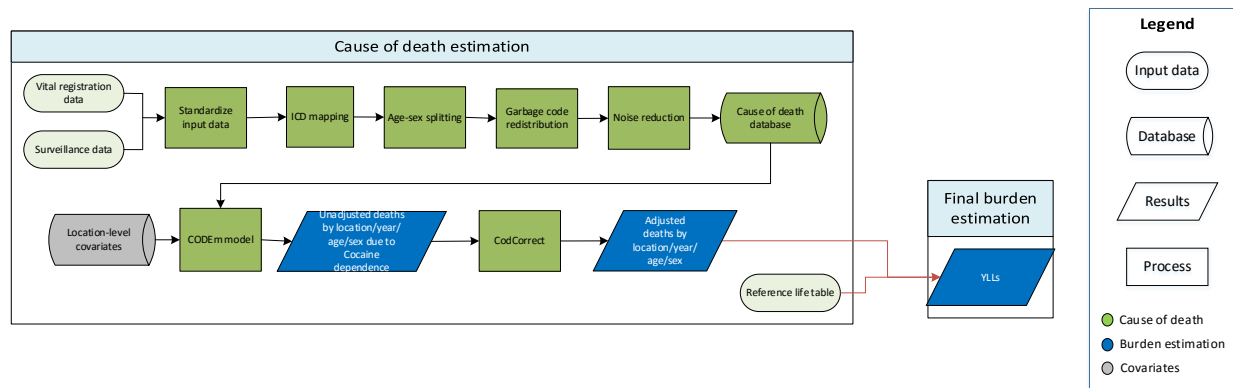

### Input data

All data were from vital registration and surveillance sources. Data from countries with sparse yet heterogeneous data were also excluded as the data exaggerated fluctuations in deaths and gave implausible regional patterns. Excluded data were typically from developing countries.

### Modelling strategy

Cause of death modelling for cocaine use followed the general CODEm strategy. In GBD 2016 additional geographies were included and age groups were extended beyond 80+. For GBD 2016, the health systems access covariate was replaced with the health care access and quality index covariate.

**Table: covariates used in cocaine use CODEm model**

| Level | Covariate                            | Direction |
|-------|--------------------------------------|-----------|
| 1     | alcohol use (litres per capita)      | +         |
|       | cumulative cigarettes (10 years)     | +         |
|       | cumulative cigarettes (5 years)      | +         |
|       | smoking prevalence                   | +         |
| 2     | health care access and quality index | -         |
| 3     | log LDI (I\$ per capita)             | 0         |
|       | education (years per capita)         | 0         |
|       | Socio-demographic Index              | +         |

A significant limitation to previous cocaine use models was assumptions surrounding the redistribution of garbage codes. In GBD 2016, ICD codes for accidental poisoning (X40-44) were redistributed to the underlying GBD cause (substance use disorder) using an algorithm devised from analyzing national registry data from several countries and expert feedback. This is an improvement on the cocaine use model from previous rounds of GBD. There were no other substantial changes from GBD 2015.

## Amphetamine Dependence

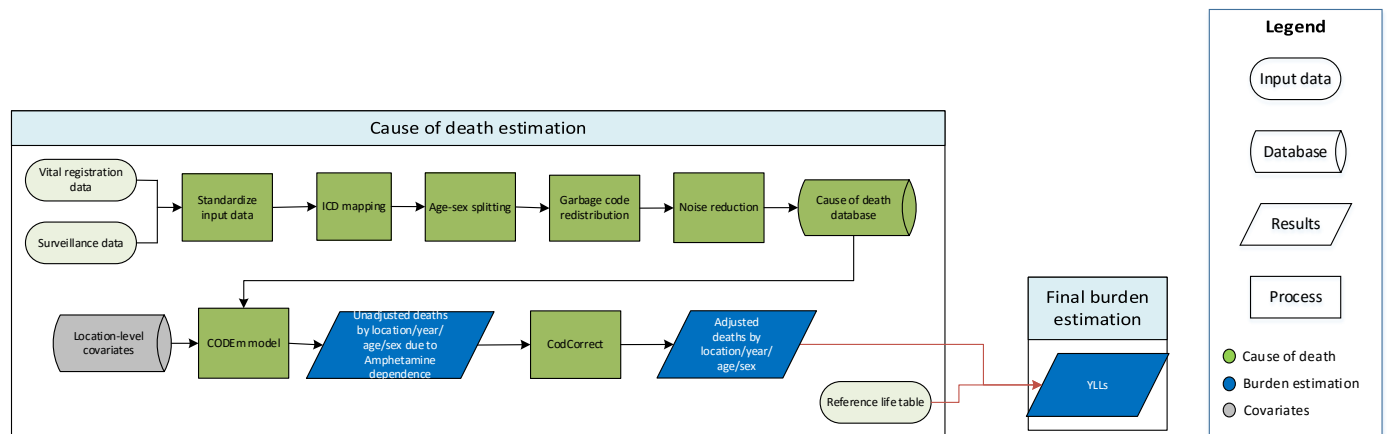

### Input data

All data were from vital registration and surveillance sources. Data from countries with sparse yet heterogeneous data were also excluded as the data exaggerated fluctuations in deaths and gave implausible regional patterns. Excluded data were typically from developing countries.

### Modelling strategy

Cause of death modelling for amphetamine use followed the general CODEm strategy. In GBD 2016 additional geographies were included and age groups were extended beyond 80+. For GBD 2016, the health systems access covariate was replaced with the health care access and quality index covariate.

**Table: covariates used in amphetamine use CODEm model**

| Level | Covariate                            | Direction |
|-------|--------------------------------------|-----------|
| 1     | alcohol use (litres per capita)      | +         |
|       | cumulative cigarettes (10 years)     | +         |
|       | cumulative cigarettes (5 years)      | +         |
|       | smoking prevalence                   | +         |
| 2     | health care access and quality index | -         |
| 3     | log LDI (I\$ per capita)             | 0         |
|       | education (years per capita)         | 0         |
|       | Socio-demographic Index              | +         |

A significant limitation to previous amphetamine use models was assumptions surrounding the redistribution of garbage codes. In GBD 2015, ICD codes for accidental poisoning (X40-44) were redistributed to the underlying GBD cause (substance use disorder) using an algorithm devised from analyzing national registry data from several countries and expert feedback. This is an improvement on the amphetamine use model from previous rounds of GBD. There were no other substantial changes from GBD 2015.

## Other drug use disorders

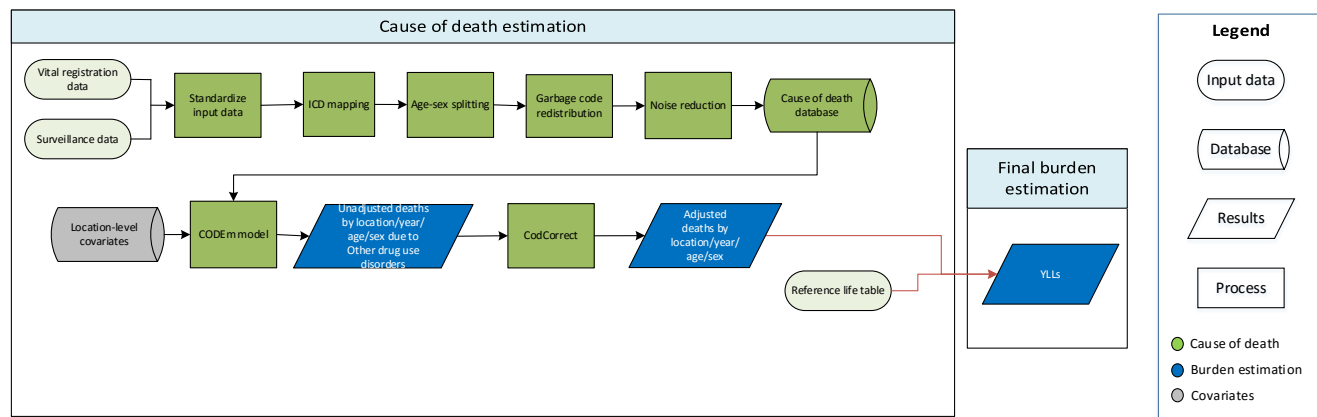

### Input data

All data were from vital registration and China surveillance sources. Data from countries with sparse yet heterogeneous data were also excluded as the data exaggerated fluctuations in deaths and gave implausible regional patterns. Excluded data were typically from developing countries.

### Modelling strategy

Cause of death modelling for other drug use followed the general CODEm strategy. In GBD 2016 additional geographies were included and age groups were extended beyond 80+. For GBD 2016, the health systems access covariate was replaced with the health care access and quality index covariate.

**Table: covariates used in other drug use CODEm model**

| Level | Covariate                            | Direction |
|-------|--------------------------------------|-----------|
| 1     | alcohol (litres per capita)          | +         |
|       | cumulative cigarettes (10 years)     | +         |
|       | cumulative cigarettes (5 years)      | +         |
|       | smoking prevalence                   | +         |
| 2     | health care access and quality index | -         |
| 3     | log LDI (I\$ per capita)             | 0         |
|       | education (years per capita)         | 0         |
|       | Socio-demographic Index              | 0         |



A significant limitation to previous other drug use models were assumptions surrounding the redistribution of garbage codes. In GBD 2016, ICD codes for accidental poisoning (X40-44) were redistributed to the underlying GBD cause (substance use disorder) using an algorithm devised from analyzing national registry data from several countries and expert feedback. This is an improvement on the other drug use model from previous rounds of GBD. There were no other substantial changes from GBD 2015.

# Eating disorders

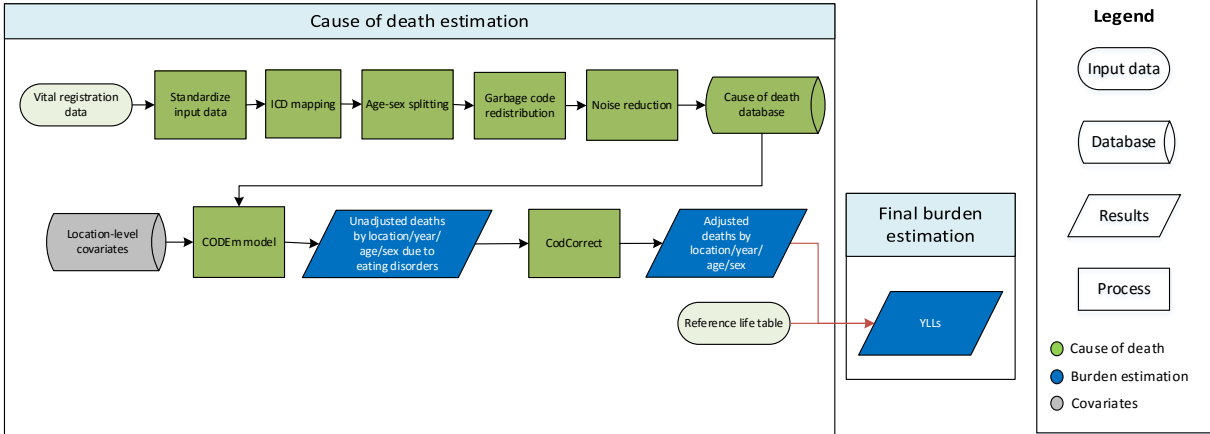

## Input data

Data used to estimate eating disorders mortality included vital registration data from the cause of death (COD) database. Data points from sub-Saharan Africa were excluded as the redistribution of garbage codes led to implausible rates and age patterns of deaths due to eating disorders. Additionally, we excluded data from countries with small populations and sparse yet heterogeneous data, as these sources exaggerated fluctuations in deaths and gave implausible regional patterns. Data were excluded from countries including but not limited to Caribbean countries, Oceanic countries, Brunei, El Salvador, Guatemala, Morocco, Malaysia, Philippines, Algeria, Palestine, Greenland, and Malta.

## Modelling strategy

Eating disorders was modelled using standard CODEm modelling approach and encompassing the two child models of anorexia nervosa and bulimia nervosa. Age was restricted to deaths occurring between 5 and 49 years of age based on expert advice and patterns of prevalence seen in the non-fatal models of anorexia nervosa and bulimia nervosa. Several covariates were applied to this model and are listed in the table below, along with the direction in which they were applied.

| Level | Covariate                                              | Direction |
|-------|--------------------------------------------------------|-----------|
| 1     | education (years per capita)                           | +         |
|       | log LDI (I\$ per capita)                               | +         |
|       | underweight (proportion <2SD weight for age, <5 years) | -         |
|       | sanitation (proportion with access)                    | +         |
|       | maternal education (years per capita)                  | +         |
| 2     | health care access and quality index                   | -         |
| 3     | Socio-demographic Index                                | +         |

In GBD 2013, eating disorders were modelled as a negative binomial model using a custom approach. This approach was changed in GBD 2015 with eating disorders being modelled as a standard CODEm model. The modelling strategy was changed in GBD 2015 as no obvious benefit was seen from using the custom modelling approach. As such, it was decided that all eating disorders (eating disorders, anorexia nervosa, and bulimia nervosa) would be modelled using CODEm. GBD 2016 utilised the same approach as GBD 2015 with the only difference being the inclusion of covariates.

The rate of deaths due to eating disorders is relatively low although we suspect that in many countries, particularly developing countries, the coding of deaths to eating disorders is inconsistent. For example, a sharp increase in deaths was seen in the raw data from age 50 onward, which we believe is due to the incorrect assignments of deaths eg, deaths from starvation due to neglect or causes such as dementia being incorrectly assigned to anorexia nervosa which is then reflected in the overarching eating disorders model. This causes issues when trying to discern plausible patterns in age and geography.

## Anorexia nervosa

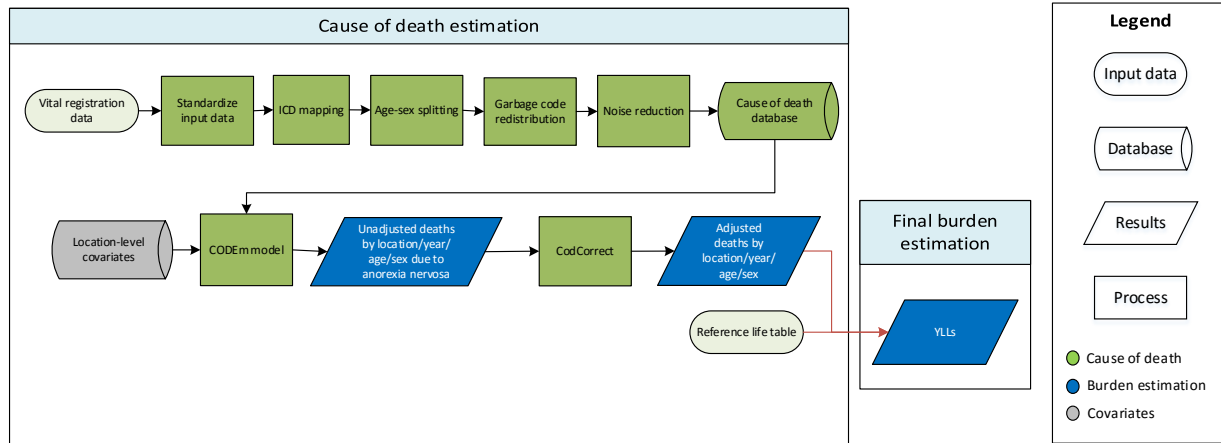

### Input data

Data used to estimate anorexia nervosa mortality included centrally prepped vital registration data from the cause of death (COD) database. Data points from sub-Saharan Africa were excluded as the redistribution of garbage codes led to implausible rates and age patterns of deaths due to eating disorders. Additionally, we excluded data from countries with small populations and sparse yet heterogeneous data as these sources exaggerated fluctuations in deaths and gave implausible regional patterns. Data were also excluded from countries including but not limited to Caribbean countries, Oceanic countries, some Central Latin American countries, and other developing countries (particularly those with small populations).

### Modelling strategy

Anorexia nervosa was modelled using the standard CODEm approach and came under the eating disorders parent model. Age was restricted to deaths occurring between 5 and 49 years based on expert advice and patterns of prevalence seen in the non-fatal model. Several covariates were applied to this model and are listed in the table below, along with the direction in which they were applied.

| Level | Covariate                                              | Direction |
|-------|--------------------------------------------------------|-----------|
| 1     | education (years per capita)                           | +         |
|       | log LDI (I\$ per capita)                               | +         |
|       | underweight (proportion <2SD weight for age, <5 years) | -         |
|       | sanitation (proportion with access)                    | +         |
|       | maternal education (years per capita)                  | +         |
| 2     | health care access and quality index                   | -         |
| 3     | Socio-demographic Index                                | +         |

In GBD 2013, anorexia nervosa deaths were extrapolated from the eating disorders model, which was modelled through a negative binomial approach. In GBD 2015, we changed this strategy and modelled anorexia nervosa deaths through a standard CODEm approach under the overarching eating disorders model as there was no benefit observed from applying the custom approach. As such, it was decided that all eating disorders (eating disorders, anorexia nervosa, and bulimia nervosa) would be modelled using CODEm. GBD 2016 utilised the same approach as GBD 2015 with the only difference being the inclusion of covariates.

The rate of deaths due to anorexia nervosa is relatively low although we suspect that in many countries, particularly lower-income countries, the coding of deaths to eating disorders is inconsistent. For example, a sharp increase in deaths was seen in the raw data from age 50 onward, which we believe is due to the incorrect assignments of deaths to anorexia nervosa, eg, deaths from starvation due to dementia being incorrectly assigned to anorexia nervosa. This causes issues when trying to discern plausible patterns in age and geography.

## Bulimia nervosa

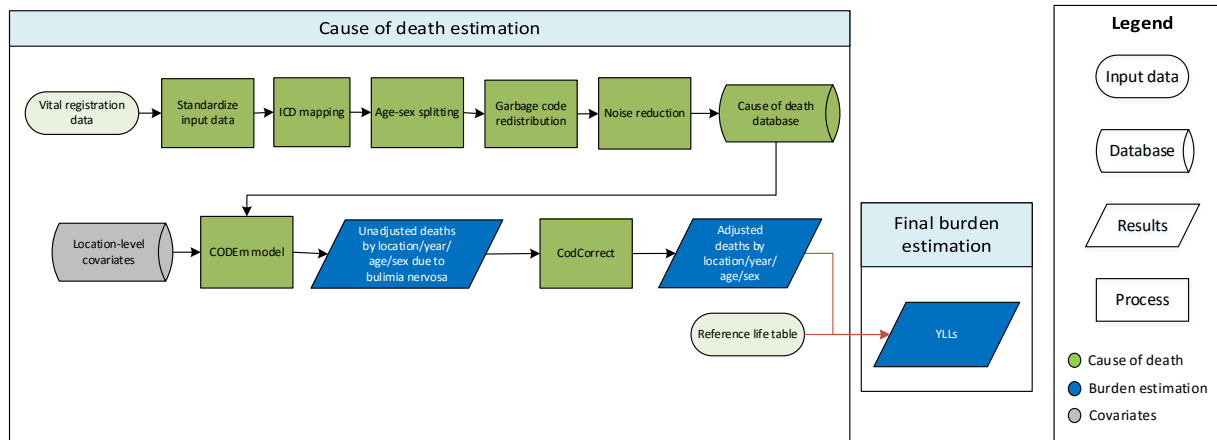

### Input data

Data used to estimate bulimia nervosa mortality included centrally prepped vital registration data from the cause of death (COD) database. Data points from sub-Saharan Africa were excluded as the redistribution of garbage codes led to implausible rates and age patterns of deaths due to eating disorders. Additionally, we excluded data from countries with small populations and sparse yet heterogeneous data, as these sources exaggerated fluctuations in deaths and gave implausible regional patterns. This included, but was not limited to, Greenland, Malta, and Brunei.

### Modelling strategy

Bulimia nervosa was modelled using the standard CODEm approach and comes under the eating disorders parent model. Age was restricted to deaths occurring between 5 and 49 years based on expert advice and patterns of prevalence seen in the non-fatal model. Several covariates were applied to this model and are listed in the table below, along with the direction in which they were applied.

| Level | Covariate                                              | Direction |
|-------|--------------------------------------------------------|-----------|
| 1     | education (years per capita)                           | +         |
|       | log LDI (I\$ per capita)                               | +         |
|       | underweight (proportion <2SD weight for age, <5 years) | -         |
|       | sanitation (proportion with access)                    | +         |
|       | maternal education (years per capita)                  | +         |
| 2     | health care access and quality index                   | -         |
| 3     | Socio-demographic Index                                | +         |

In GBD 2013, bulimia nervosa was not modelled as a distinct cause of death. Any deaths due to bulimia nervosa were attributed to the eating disorders model. We changed this approach in GBD 2015, recognizing bulimia nervosa as an individual cause of death and therefore modelled it as a standard CODEm model under the overarching eating disorders model. This decision was based on observing deaths due to bulimia nervosa in high-quality vital registration data, such as data from the US. These data also include eating disorders not otherwise specified. GBD 2016 utilised the same approach as GBD 2015 with the only difference being the inclusion of covariates.

The rate of deaths due to bulimia nervosa is relatively low although we suspect that in many countries, particularly lower-income countries, the coding of deaths to eating disorders is inconsistent. Furthermore, the inclusion of deaths due to eating disorders not otherwise specified may add more noise to the model. This causes issues when trying to discern plausible patterns in age and geography.

## Diabetes Mellitus

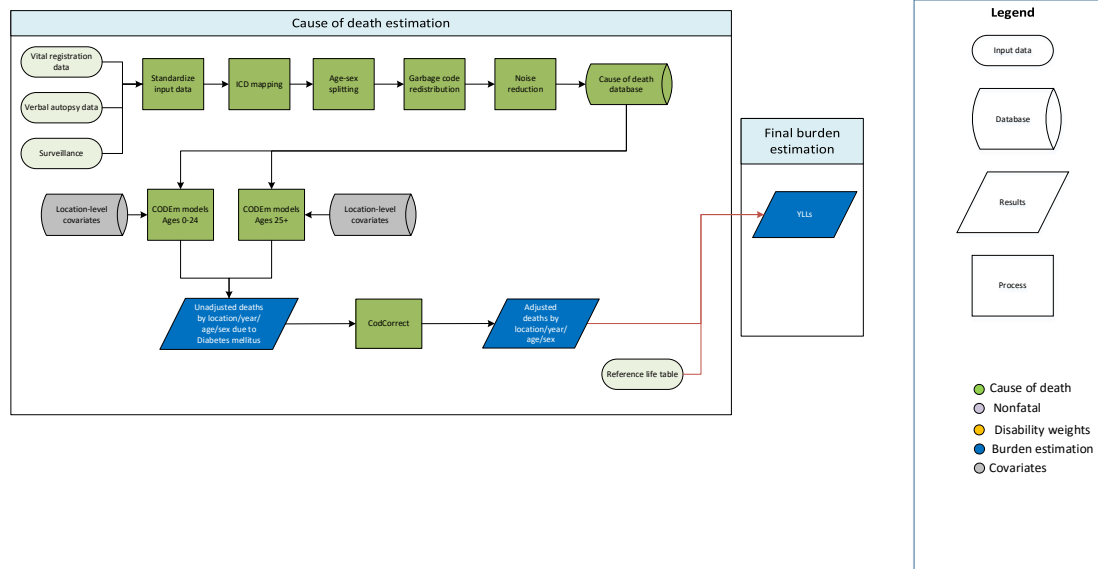

### Input data

**Verbal Autopsy Data:** We outliered VA data points in urban Indian states where high-quality vital registration data were also available. We also outliered data points where the VA data were implausible in all age groups as we determined that these data sources were unreliable.

**Vital Registration Data:** We outliered all data in four urban Indian states where the source of the data was unreliable according to expert opinion. We also outliered ICD9BTL data points which were inconsistent with the rest of the data series and created unlikely time trends.

### Modeling strategy

We used a slight variation on the standard CODEm approach to model deaths from diabetes mellitus. Since deaths in younger age groups are almost exclusively due to Type 1 diabetes while deaths in older ages are primarily due to Type 2, we used two models to estimate overall diabetes deaths. We reviewed the cause-fraction of deaths due to Type 1 and Type 2 diabetes at the global, super region, and regional level. We selected a conservative estimate of 25 years; one model is for deaths in 0-25 year olds and the second model is for deaths in 25+ year olds.

The following list are the covariates included in the model.

- Education years per-capita
- A composite score that approximates access to and quality of personal healthcare (Healthcare Access and Quality Index)
- Lag distributed GDP per capita in base 2010 international dollars
- Estimated national availability of animal fat expressed as kilocalories per capita
- Mean diabetes fasting plasma glucose (mmol/L) by age group
- Age-standardized prevalence of diabetes



- Age-standardized mean body mass index for adults ages 20+ (separate by sex)
- Mean serum total cholesterol (mmol/L) for individuals above age 25
- Mean systolic blood pressure (mmHg) for individuals above age 25
- Estimated energy adjusted national availability of fruits expressed in grams per person per day
- Estimated energy adjusted national availability of vegetables expressed in grams per person per day
- Estimated energy adjusted national availability of whole grains expressed in grams per person per day
- Estimated national availability of dietary energy expressed in kilocalories per person per day

## Acute Glomerulonephritis

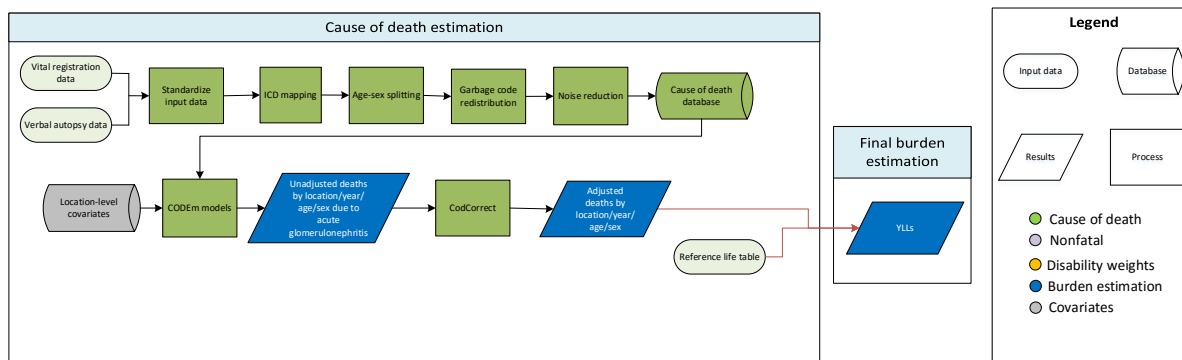

### Input data

Vital registration data were used to model mortality due to acute glomerulonephritis. Vital registration data were standardized and mapped according to the GBD causes of death ICD mapping method. These data were then age-sex split, and appropriate redistribution of garbage code data was performed. After applying noise reduction, these data were uploaded to the COD database. Outliers were identified by systematic examination of data points for all location-years. Data points that violated well-established age or time trends or that resulted in extremely high or low cause fractions were determined to be outliers.

### Modelling strategy

The estimation strategy used for fatal acute glomerulonephritis is largely similar to methods used in GBD 2015. A standard CODEm model with location-level covariates was used to model deaths due to acute glomerulonephritis. Age-restrictions for death estimations secondary to acute glomerulonephritis include 28 days for lower bound, 95+ for upper bound. Iterations of models were assessed at the location/year/age-group/sex level to determine whether data points merited exclusion via outliering. Unadjusted death estimates were adjusted using CoDCorrect to produce final estimates of YLLs. The estimates are limited by a paucity of data for regions such as Eastern and Central sub-Saharan Africa. The covariates used are displayed below.

| Level | Covariate                                       | Direction |
|-------|-------------------------------------------------|-----------|
| 2     | Diabetes age-standardized prevalence            | +         |
|       | Mean systolic blood pressure (mmHg)             | +         |
|       | Sanitation (proportion with access)             | -         |
|       | Improved water sources (proportion with access) | -         |
|       | Health care access and quality index            | -         |
| 3     | Socio-demographic Index                         | -         |
|       | Education (years per capita)                    | -         |
|       | Log LDI (\$I per capita)                        | -         |

## Chronic Kidney Disease

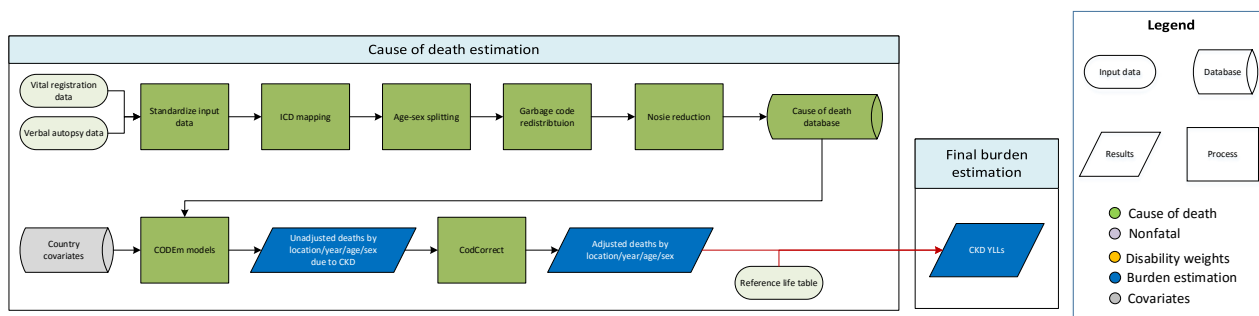

### Input data

Vital registration and verbal autopsy data were used to model mortality due to urolithiasis. Outliers were identified by systematic examination of data points for all location-years. Data were standardised and mapped according to the GBD causes of death ICD mapping method. These data were then age-sex split, and appropriate redistribution of garbage code data was performed. Data points that violated well-established age or time trends or that resulted in extremely high or low cause fractions were determined to be outliers. For GBD 2016, deaths due to congenital kidney anomalies (cystic kidney disease and reflux hydronephrosis) were attributed to chronic kidney disease, marking a change from GBD 2015 when these deaths were assigned to congenital anomalies.

### Modelling strategy

The estimation strategy used for fatal chronic kidney disease is largely similar to methods used in GBD 2015. A standard CODEm model with location-level was used to model deaths due to chronic kidney disease. Iterations of models were assessed at the location/year/age-group/sex level to determine whether data points merited exclusion via outliering. Unadjusted death estimates were adjusted using CoDCorrect to produce final estimates of YLLs. The covariates used are displayed below.

| Level | Covariate                                         | Direction |
|-------|---------------------------------------------------|-----------|
| 1     | Diabetes fasting plasma glucose (mmol/L)          | +         |
|       | Diabetes age-standardized prevalence (proportion) | +         |
|       | Mean systolic blood pressure (mmHg)               | +         |
|       | Mean BMI                                          | +         |
|       | Health care access and quality index              | -         |
| 2     | Mean cholesterol                                  | +         |
|       | Total calories (kcal per capita)                  | -         |
|       | Red meat (kcal per capita)                        | 0         |
|       | Whole grains (kcal per capita)                    | 0         |
|       | Animal fat (kcal per capita)                      | 0         |
| 3     | Socio-demographic Index                           | 0         |
|       | Education (years per capita)                      | -         |
|       | Log LDI (\$I per capita)                          | -         |

## Chronic Kidney Disease subtypes

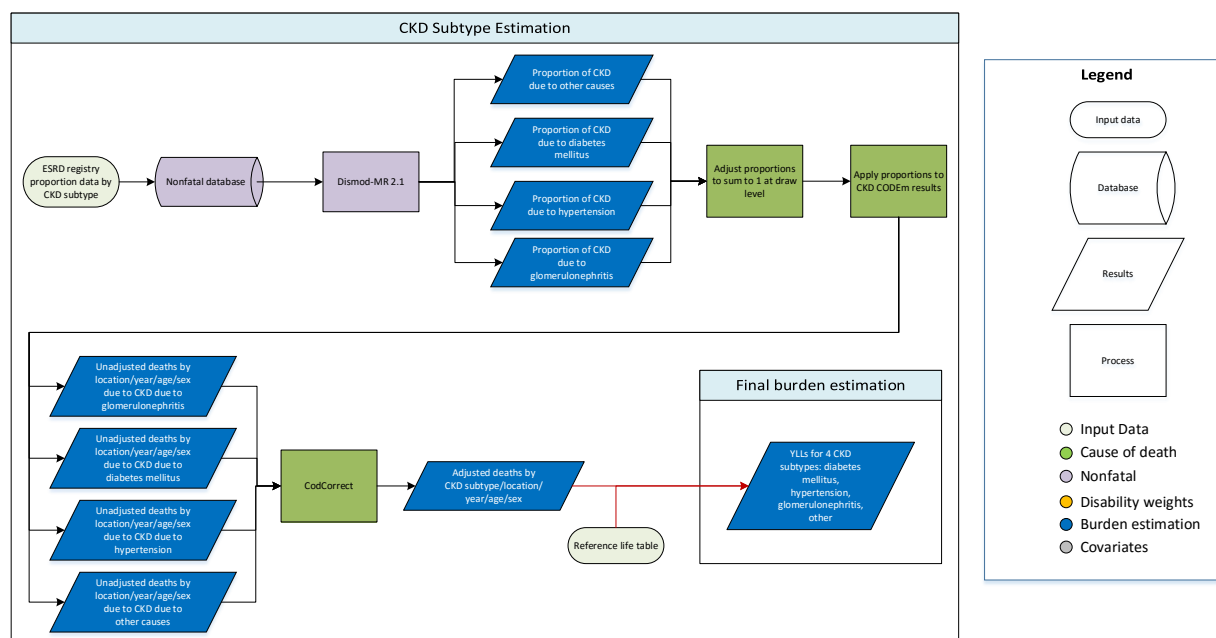

### Input data

The estimation strategy for CKD subtypes of 1) diabetes mellitus, 2) hypertension, 3) glomerulonephritis, and 4) “other” has changed significantly from the GBD 2015 analysis to achieve consistency of method among the four subtypes. This improved method is detailed below.

Data from end-stage renal disease registries were used to inform estimates of proportion of CKD mortality attributable to each CKD subtype. These data were age-split using the age pattern obtained from the Australia & New Zealand Dialysis and Transplant Registry (ANZDATA) which provides age and subtype-specific data. The age-pattern was determined by calculating the number of cases of CKD by etiology over the total number of cases for all etiologies for each 5-year age group. Then, aggregate-age proportions were split using the age-specific prevalence proportions and rescaled to sum to 1 within each 5-year age group.

Vital registration (VR) data were excluded from estimates as etiology coding in VR sources was considered highly variable and inconsistent between countries.

### Modelling strategy

We ran DisMod-MR 2.1 models including diabetes prevalence and mean systolic blood pressure as country-level covariates to obtain estimates of proportions for each subtype by location, year, age, and sex. The results from these models were adjusted so that estimates across the subtypes equaled 1 at each of 1,000 draws. These adjusted proportions were applied to the parent CKD CODEm model.

| <b>Model</b>                            | <b>Covariate</b>                     | <b>Value</b>               | <b>Exponentiated</b>  |
|-----------------------------------------|--------------------------------------|----------------------------|-----------------------|
| CKD proportion due to diabetes mellitus | Diabetes age-standardized prevalence | 0.36<br>(0.29 – 0.42)      | 1.43<br>(1.34 – 1.53) |
| CKD proportion due to hypertension      | Mean systolic blood pressure         | 0.013<br>(0.00036 – 0.043) | 1.01<br>(1.00 – 1.04) |

## Urinary diseases and male infertility

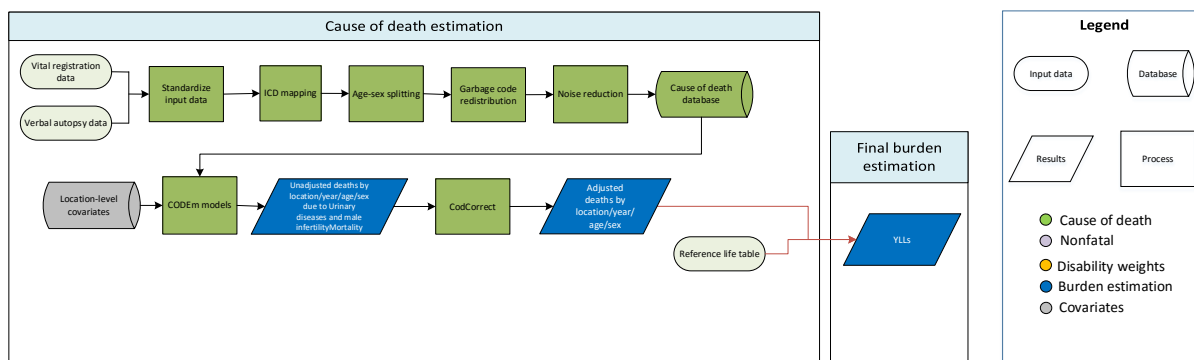

### Input data

Vital registration data was used to model mortality due to urinary diseases and male infertility. Vital registration data were standardized and mapped according to the GBD causes of death ICD mapping method. These data were then age-sex split, and appropriate redistribution of garbage code data was performed. After applying noise reduction, these data were uploaded to the COD database. Outliers were identified by systematic examination of data points for all location-years. Data points that violated well-established age or time trends or that resulted in extremely high or low cause fractions were determined to be outliers.

### Modelling strategy

The estimation strategy used for fatal urinary diseases and male infertility is largely similar to methods used in GBD 2015. A standard CODEm model with location-level covariates was used to model deaths due to urinary diseases and male infertility. Iterations of models were assessed at the location/year/age-group/sex level to determine whether data points merited exclusion via outliering. The estimates are limited by a paucity of data for regions such as Eastern and Central sub-Saharan Africa. The results of this disease differ by gender as no “male infertility” estimates were performed among women. The covariates used are displayed below.

| Level | Covariate                            | Direction |
|-------|--------------------------------------|-----------|
| 2     | Mean BMI                             | +         |
|       | Health care access and quality index | -         |
|       | Latitude under 15 (proportion)       | 0         |
|       | Latitude 15 to 30 (proportion)       | 0         |
|       | Latitude 30 to 45 (proportion)       | 0         |
|       | Latitude over 45 (proportion)        | 0         |
| 3     | Education (years per capita)         | -         |
|       | Log LDI (\$I per capita)             | -         |
|       | Socio-demographic Index              | 0         |

## Interstitial Nephritis and Urinary Tract Infections

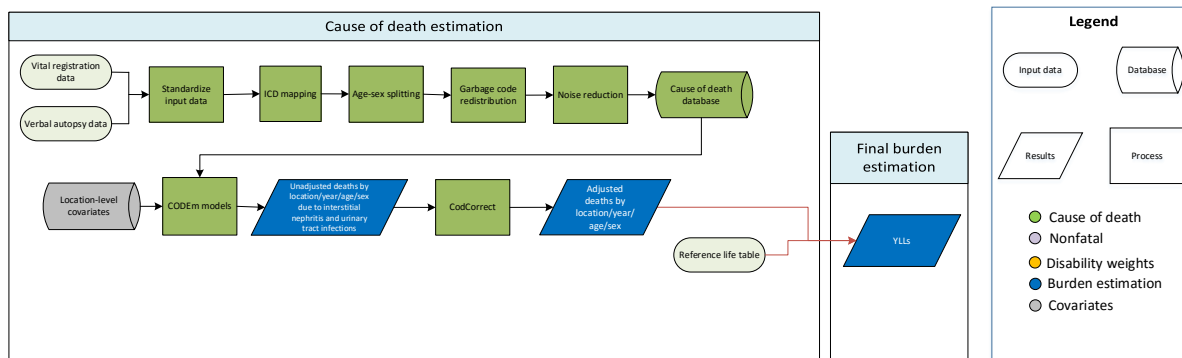

### Input data

Vital registration and verbal autopsy data were used to model mortality due to interstitial nephritis. Data were standardized and mapped according to the GBD causes of death ICD mapping method. These data were then age-sex split, and appropriate redistribution of garbage code data was performed. After applying noise reduction, these data were uploaded to the COD database. Outliers were identified by systematic examination of data points for all location-years. Data points that violated well-established age or time trends or that resulted in extremely high or low cause fractions were determined to be outliers.

### Modelling strategy

The estimation strategy used for fatal interstitial nephritis is largely similar to methods used in GBD 2015. A standard CODEm model with location-level covariates was used to model deaths due to interstitial nephritis. Age-restrictions for death estimations secondary to interstitial nephritis include 0 days for lower bound, 80+ for upper bound. Iterations of models were assessed at the location/year/age-group/sex level to determine whether data points merited exclusion via outliering. Unadjusted death estimates were adjusted using CoDCorrect to produce final estimates of YLLs. The estimates are limited by a paucity of data for regions such as Eastern and Central sub-Saharan Africa. The covariates used are displayed below.

| Level | Covariate                            | Direction |
|-------|--------------------------------------|-----------|
| 1     | Sanitation (proportion with access)  | –         |
| 2     | Education (years per capita)         | –         |
|       | Log LDI (\$I per capita)             | –         |
|       | Health care access and quality index | –         |
| 3     | Socio-demographic Index              | 0         |

Interstitial nephritis and urinary tract infections was a target cause for the Parkinson and Alzheimer disease mortality correction process whereby deaths due to causes closely associated with Parkinson and Alzheimer disease and other dementias were redistributed to Parkinson and Alzheimer disease and

other dementias in order to account for the common misclassification of deaths due to these neurological diseases. Detailed information on this process can be found in section 4 of the appendix.



## Urolithiasis

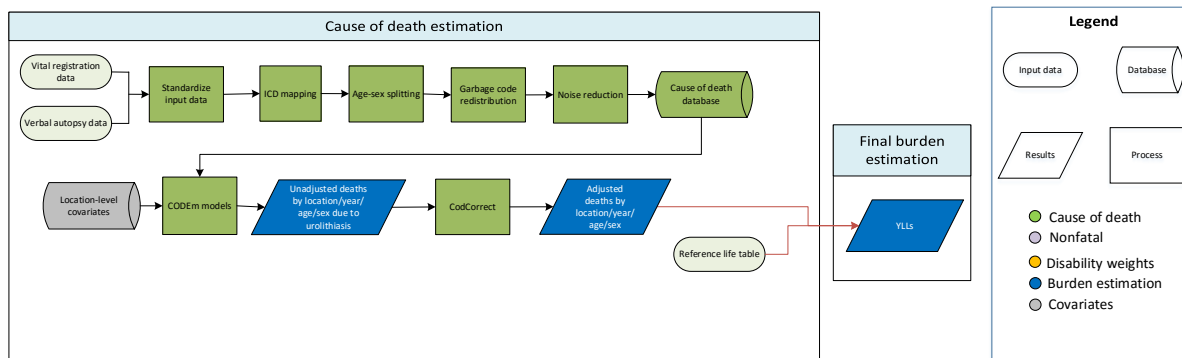

### Input data

Vital registration and verbal autopsy data were used to model mortality due to urolithiasis. Data were standardized and mapped according to the GBD causes of death ICD mapping method. These data were then age-sex split, and appropriate redistribution of garbage code data was performed. After applying noise reduction, these data were uploaded to the COD database. Outliers were identified by systematic examination of data points for all location-years. Data points that violated well-established age or time trends or that resulted in extremely high or low cause fractions were determined to be outliers.

### Modelling strategy

The estimation strategy used for fatal urolithiasis is largely similar to methods used in GBD 2015. A standard CODEm model including location-level covariates was used to model deaths due to urolithiasis. Age-restrictions for death estimations secondary to urolithiasis include 5 years for lower bound, 80+ for upper bound. Iterations of models were assessed at the location/year/age-group/sex level to determine whether data points merited exclusion via outliering. Unadjusted death estimates were adjusted using CoDCorrect to produce final estimates of YLLs. The estimates are limited by a paucity of data for regions such as Eastern and Central sub-Saharan Africa. The covariates used are displayed below.

| Level | Covariate                                 | Direction |
|-------|-------------------------------------------|-----------|
| 1     | Temperature (90 <sup>th</sup> percentile) | +         |
| 2     | Animal fat (kcal per capita)              | +         |
|       | Fruits (kcal per capita)                  | -         |
|       | Vegetables (kcal per capita)              | -         |
|       | Red meat (kcal per capita)                | +         |
|       | Health care access and quality index      | -         |
| 3     | Socio-demographic Index                   | 0         |
|       | Log LDI (\$I per capita)                  | -         |

## Other urinary diseases

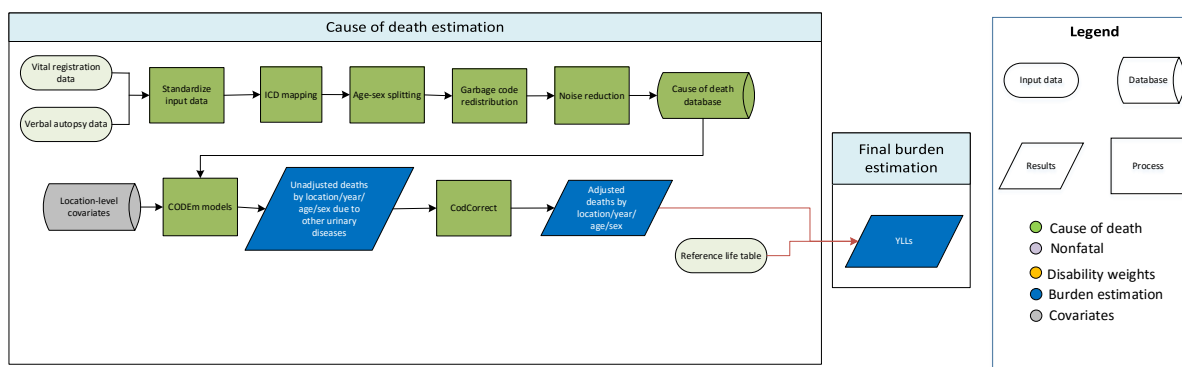

### Input data

Vital registration and verbal autopsy data were used to model mortality due to other urinary diseases. Data were standardized and mapped according to the GBD causes of death ICD mapping method. These data were then age-sex split, and appropriate redistribution of garbage code data was performed. After applying noise reduction, these data were uploaded to the COD database. Outliers were identified by systematic examination of data points for all location-years. Data points that violated well-established age or time trends or that resulted in extremely high or low cause fractions were determined to be outliers.

### Modelling strategy

The estimation strategy used for other urinary diseases is largely similar to methods used in GBD 2015. A standard CODEm model with location-level covariates was used to model deaths due to other urinary diseases. Age-restrictions for death estimations secondary to urinary diseases and male infertility include 0 days for lower bound, 95+ for upper bound. Iterations of models were assessed at the location/year/age-group/sex level to determine whether data points merited exclusion via outliering. Unadjusted death estimates were adjusted using CoDCorrect to produce final estimates of YLLs. The estimates are limited by a paucity of data for regions such as Eastern and Central sub-Saharan Africa. The covariates used are displayed below.

| Level | Covariate                            | Direction |
|-------|--------------------------------------|-----------|
| 1     | Mean BMI                             | +         |
| 2     | Education (years per capita)         | -         |
|       | Log LDI (\$I per capita)             | -         |
|       | Health care access and quality index | -         |
| 3     | Socio-demographic Index              | 0         |

## Gynaecological conditions

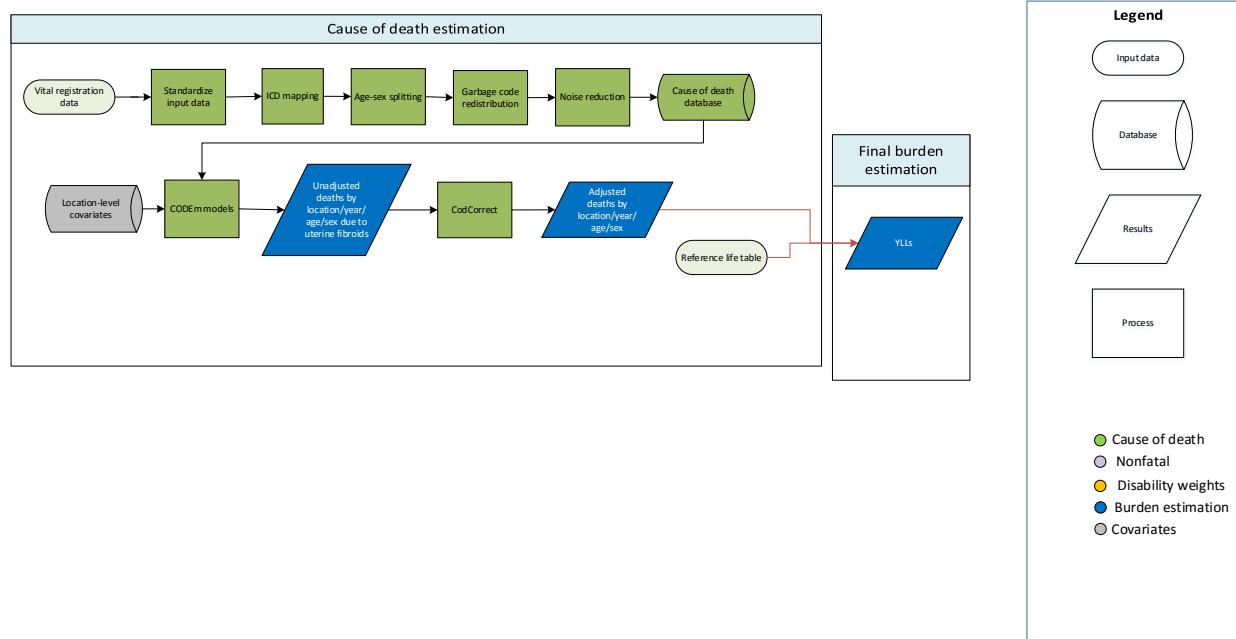

### Input data

For GBD 2016, vital registration data were used to estimate deaths for each of the five fatal gynaecological conditions, which include uterine fibroids, PCOS, endometriosis, genital prolapse, and other gynaecological conditions. These causes are sex-specific to women and we only model deaths among women. ICD9 and ICD10 codes for each are listed below. Data points were selected as outliers if they were implausibly high, low, or significantly conflicted with established age or temporal patterns.

### ICD10 and ICD9 codes used for gynecological disorders

| Model                         | ICD10 code       | ICD9 code               |
|-------------------------------|------------------|-------------------------|
| Uterine Fibroids              | D25-D26.9, D28.2 | 218-219.9, 236.0        |
| Endometriosis                 | N80-N80.9        | 617-617.9               |
| Genital Prolapse              | N81-N81.9        | 618-618.9               |
| Polycystic Ovarian Syndrome   | E28.2            | 256.4                   |
| Other Gynecological Disorders |                  | 621.4-622.7, 629-629.81 |

## Modelling strategy

For GBD 2016, we estimated mortality due to total of all gynaecological diseases as well as each of the sub-categories using CODEm. We assumed no deaths from premenstrual syndrome and primary infertility, which we model for nonfatal outcomes.

Continuing in GBD 2016, we have reassigned deaths due to leiomyomas and other benign uterine tumors to uterine fibroids.

| <b>Gynaecologic disorders</b> |                       |              |                  |
|-------------------------------|-----------------------|--------------|------------------|
| <b>Covariate</b>              | <b>Transformation</b> | <b>Level</b> | <b>Direction</b> |
| Education                     | None                  | 3            | -1               |
| LDI                           | Log                   | 3            | -1               |
| Percent Births in 35+         | None                  | 2            | 1                |
| Skilled Birth Attendance      | None                  | 2            | -1               |
| Smoking                       | None                  | 1            | 0                |
| Total Fertility Rate          | None                  | 2            | 1                |
| Health System Access          | None                  | 2            | -1               |
| SDI                           | None                  | 3            | -1               |
| HAQI                          | None                  | 2            | -1               |

## Haemoglobinopathies and hemolytic anaemias

This write-up covers the following sub-causes: Sickle cell disorders, thalassemias, glucose-6-phosphate dehydrogenase (G6PD) deficiency, and other haemoglobinopathies and hemolytic anaemias

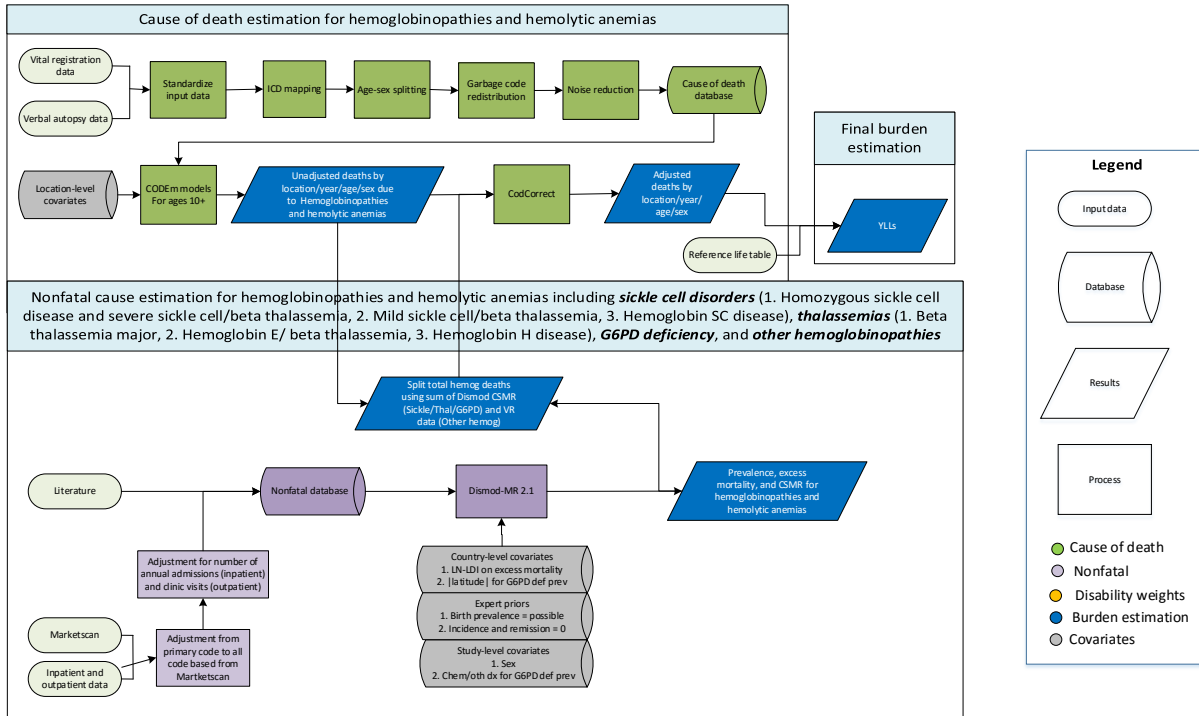

### Input data

For GBD 2016, the overall CODEm model for haemoglobinopathies and hemolytic anaemias was informed by centrally prepped data stored in the cause of death (COD) database. All data from all geographies were reviewed. Outliers were identified as those data where age patterns or temporal patterns were inconsistent with neighbouring age groups or locations or where sparse data were predicting implausible overall temporal or age patterns for a given location.

DisMod-MR 2.2 was used to estimate sickle cell disorders, thalassemias, and G6PD deficiency age- and sex-specific prevalence and mortality for each location and year in the GBD. Three sources of data were used for DisMod-MR 2.2 models: Literature, Marketscan data, and ICD-9 & ICD-10 hospital data. Each datum for sickle cell disease models was used for one of three mutually exclusive conditions: 1) homozygous sickle cell disease and severe sickle cell/beta thalassemia, 2) Mild sickle cell/beta thalassemia, or 3) Hemoglobin SC disease. We similarly extracted data for thalassemias using three mutually exclusive disease states: 1) Beta thalassemia major, 2) Hemoglobin E/beta thalassemia, and 3) Hemoglobin H disease. G6PD deficiency was estimated as a single model. Cause-specific mortality rates for other haemoglobinopathies and hemolytic anaemias, lacking more specific data, was assumed to be geographically uniform, but did vary by age and sex; the levels and trends were informed by analysis of VR data from the COD database.

We added data identified select geographies identified by GBD collaborators for GBD 2016. Our last comprehensive literature review was completed in GBD 2015, where we identified data on prevalence, excess-mortality rate, or with-condition mortality rate. Age-specific survival probabilities from cohort studies were converted to corresponding with-condition mortality rates. G6PD deficiency is an X-linked recessive genetic disease, and genetic homozygosity served as the reference definition for our DisMod-MR 2.1 models in 2015. This was a change from GBD 2013 when we quantified G6PD deficiency on reagent tests as the reference category. Second, we extracted ICD-9-coded MarketScan data from the United States, correcting for multiple admissions, primary vs. non-primary coding, and outpatient vs. inpatient visits as determined from patient linkage analysis. Third, we used ICD-9 and ICD-10 inpatient and outpatient hospital data from all those locations where it was available, applying correction factors from analysis of claims data. These included correction factors for multiple admissions, age- and sex-specific ratio of prevalence that would be derived from only using the primary discharge ICD code versus that derived from using any of the discharge diagnosis codes, also accounting for differences in geography-specific overall hospitalization rate when calculating the ratio. This is the most substantial change for GBD 2015 when a single ratio for all ages and both sexes was applied to the data. We applied this as a correction factor for those sources where only a single ICD code is given for each discharge. Of note, there were no hospital data available for haemoglobin E/beta-thalassemia, haemoglobin H disease, or G6PD deficiency. All prevalence data from MarketScan, hospital sources, and literature were uploaded to the nonfatal database.

### Modelling strategy

We completed seven separate DisMod-MR 2.2 models as listed above. Each used log-transformed lag-distributed income as a country-level covariate on excess mortality, which had the effect of predicting higher excess mortality in those locations with lower national income. The only study covariate used for most models was for sex. Genetic G6PD deficiency is far more common in males, but for all others the male to female ratio is nearly equivalent. Our G6PD deficiency model included additional study covariates to crosswalk from non-genetic diagnostic tests (eg, chemical reagent testing) back to the reference definition. Incidence and remission were both set to be zero.

We completed data-rich (DR) and global CODEm models for males and females separately. The sum of CSMR from all seven DisMod-MR 2.2 models was used as a predictive covariate for CODEm model development. CODEm results were then split between sickle cell disorders, thalassemias, G6PD deficiency, and other haemoglobinopathies and hemolytic anaemias using summed and scaled CSMR outputs from the same models. Other haemoglobinopathies and hemolytic anaemias did not have a separate DisMod-MR 2.2 model, but was instead informed by location-specific VR data.

The primary limitation of our estimation is data availability. We elected a hybrid approach of CODEm and DisMod-MR 2.2 to improve the quality of estimates in data-poor locations, but in most of these locations data are still relatively sparse for nonfatal models, which leads to relatively large uncertainty. Further adding to the uncertainty is the fact that haemoglobinopathies dramatically increase the risk of mortality due to infectious agents such as malaria, lower respiratory infections, and diarrhea, as well as increasing the risk of maternal mortality. In locations with poor diagnostic capabilities and high infectious burden, it is thus very plausible that mortality due to haemoglobinopathies may be even higher. Secondly, our specification of seven distinct entities for DisMod-MR 2.1 models does not align perfectly with the cause categories in the central COD prep, which limits the extent to which CSMR data

from the COD database can inform nonfatal models. We will continue to work to expand our dataset and consolidate the GBD analysis of haemoglobinopathies going forward.

**Selected Covariates in parent CODEm model**

| <b>Covariate</b>                                                                                             | <b>Transformation</b> | <b>Level</b> | <b>Direction</b> |
|--------------------------------------------------------------------------------------------------------------|-----------------------|--------------|------------------|
| Education                                                                                                    | None                  | 3            | -1               |
| LDI                                                                                                          | Log                   | 3            | -1               |
| Hemoglobinopathies (sum of prevalence * excess-mortality from all DisMod models)                             | None                  | 1            | 1                |
| Sickle Cell & Thal (sum of prevalence * excess-mortality from all DisMod models – excluding G6PD deficiency) | None                  | 1            | 1                |
| SDI                                                                                                          | None                  | 3            | -1               |
| HAQI                                                                                                         | None                  | 2            | -1               |
| Health System Access, Capped                                                                                 | None                  | 2            | -1               |

## Endocrine, Blood, Metabolic, and Immune Disorders

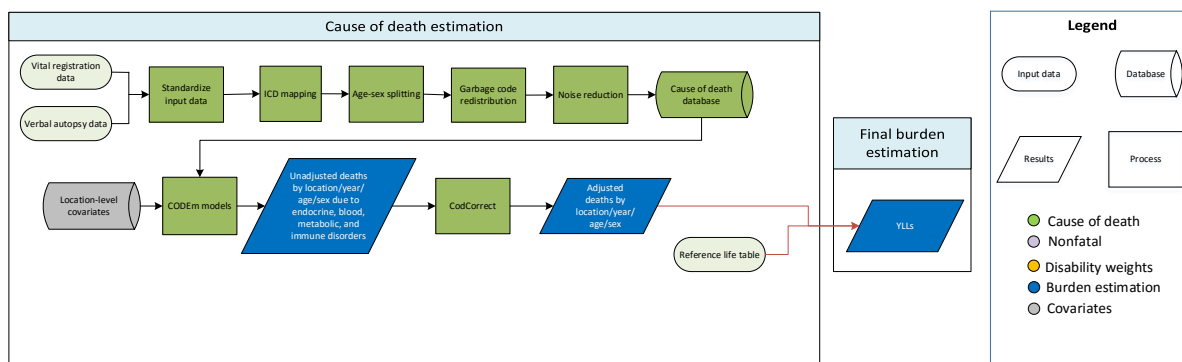

### Input data

Vital registration and verbal autopsy data were used to model mortality due to endocrine, blood, metabolic, and immune disorders. Data were standardized and mapped according to the GBD causes of death ICD mapping method. These data were then age-sex split, and appropriate redistribution of garbage code data was performed. After applying noise reduction, these data were uploaded to the COD database. Outliers were identified by systematic examination of data points for all location-years. Data points that violated well-established age or time trends or that resulted in extremely high or low cause fractions were determined to be outliers.

### Modelling strategy

The estimation strategy used for fatal endocrine, blood, metabolic, and immune disorders is largely similar to methods used in GBD 2015. A standard CODEm model with location-level covariates was used to model deaths due to endocrine, blood, metabolic, and immune disorders. Iterations of models were assessed at the location/year/age-group/sex level to determine whether data points merited exclusion via outliering. Unadjusted death estimates were adjusted using CoDCorrect to produce final estimates of YLLs. The covariates used are displayed below.

| Level | Covariate                            | Direction |
|-------|--------------------------------------|-----------|
| 1     | Mean BMI                             | +         |
| 2     | Animal fat (kcal per capita)         | +         |
|       | Alcohol (litres per capita)          | +         |
|       | Total calories (kcal per capita)     | +         |
|       | Mean cholesterol                     | +         |
|       | Health care access and quality index | -         |
| 3     | Socio-demographic Index              | 0         |
|       | Log LDI (\$I per capita)             | -         |
|       | Education (years per capita)         | -         |



## Musculoskeletal disorders

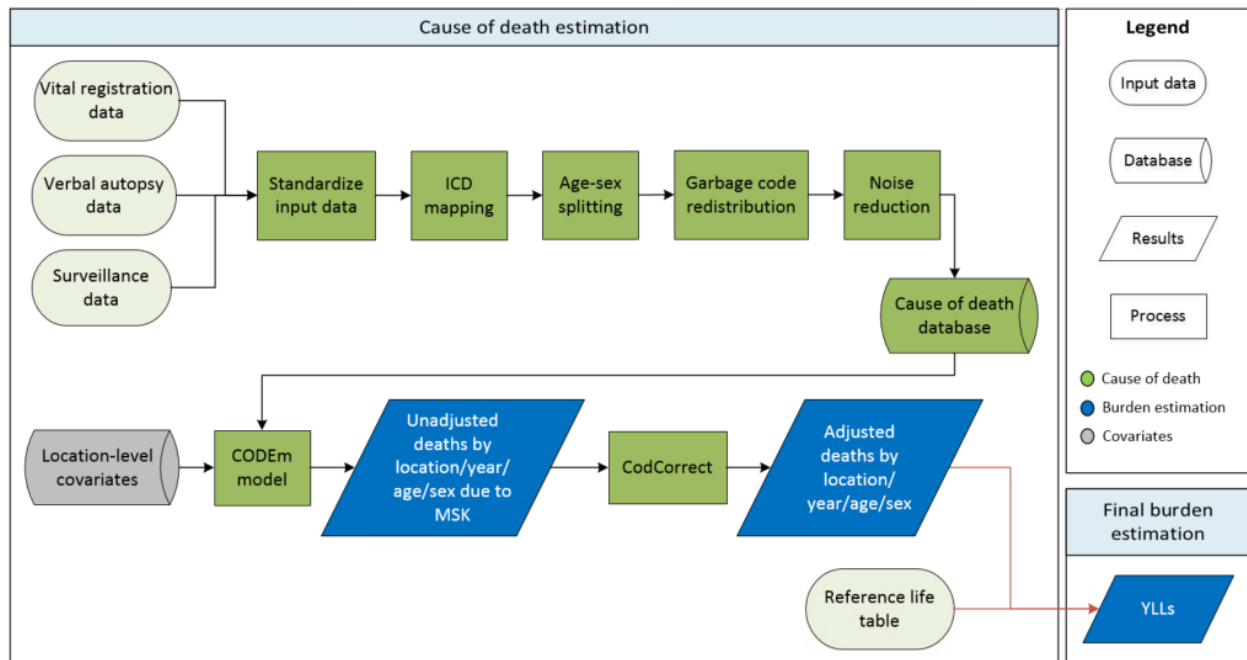

### Input data

Data used to estimate mortality from musculoskeletal disorders (MSK) included vital registration (VR), verbal autopsy (VA), and China disease surveillance point data from the cause of death (COD) database. Our outlier criteria excluded data points that were implausibly high or low relative to global or regional patterns, substantially conflicted with established age or temporal patterns, or significantly conflicted with other data sources based from the same locations or locations with similar characteristics (ie, Socio-demographic Index).

Based on these criteria, in GBD 2016 we excluded VA data from Bangladesh, Vietnam, South Africa, Burkina Faso, Ghana, and all countries in Eastern sub-Saharan Africa including Ethiopia, Kenya, Tanzania, Mozambique, and Zambia, as VA tools have poor validity in identifying MSK deaths. In India, the number of deaths from new Sample Registration System (SRS) data in urban parts of states was substantially higher than the number of deaths from Medical Certification of Cause of Death (MCCD) data. In rural India, the SRS data are the only source. We have outliered the MCCD data to make the models follow the SRS data. This does lead to higher estimates in India compared to other parts of the world. For Indonesia, we excluded mortality surveillance data from a few states with high estimates based on small numbers, ie, Kalimantan Selatan and Kalimantan Timur in males, and Maluku in females. We re-included VR from Zimbabwe and Limpopo state in South Africa, where the older age groups had been excluded in GBD 2015. Recent years of data from Kazakhstan (2013-2015) were outliered as they presented a discontinuity with previous years which has been ascribed to the country's attempt to reduce deaths due to CVD leading to an increase of deaths ICD9-BTL data from Latin American countries (Ecuador, Costa Rica, El Salvador, Guatemala, Honduras, Nicaragua, Panama, Venezuela, Antigua and Barbuda, The Bahamas, Barbados, Belize, Bermuda, Cuba, Dominica, Grenada, Guyana, Jamaica, Saint Lucia, Saint Vincent and Grenadines, Suriname and Trinidad and Tobago). The data from these countries provided in ICD9-detail or ICD10 were kept in the analysis.

### Modelling strategy

The standard CODEm modelling approach was applied to estimate deaths due to musculoskeletal disorders. We applied the same covariates used in GBD 2015, excluding the four covariates for proportions of population at 0–15, 15–30, 30–45, and 45 and over latitudes, which had no observable benefit to the model. We modified the vegetable intake covariate from kcal/day to grams/day. Otherwise, there were no changes from the GBD 2015 modelling strategy.

Covariates are shown in the following table.

| Level | Covariate                                                   | Direction |
|-------|-------------------------------------------------------------|-----------|
| 1     | BMI (mean per capita)                                       | +         |
| 2     | Alcohol consumption (litres per capita)                     | +         |
|       | Cumulative cigarettes (10 years)                            | +         |
|       | Cumulative cigarettes (5 years)                             | +         |
|       | Smoking prevalence                                          | +         |
|       | Cholesterol (mean per capita)                               | +         |
|       | Vegetable consumption (g per capita)                        | 0         |
|       | Education (years per capita)                                | 0         |
|       | Log-transformed LDI: lag-distributed income (\$ per capita) | 0         |
|       | Health care access and quality index                        | -         |
| 3     | SDI: Socio-demographic Index                                | 0         |

## Rheumatoid arthritis

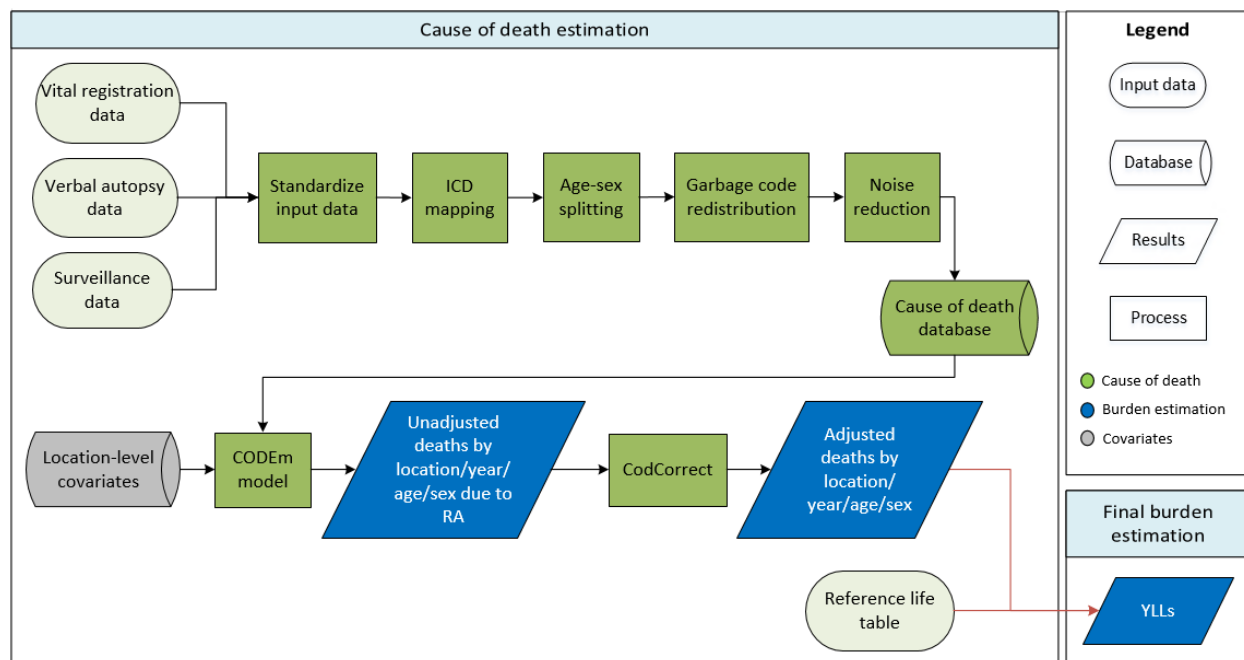

### Input data

Data used to estimate rheumatoid arthritis mortality included vital registration, verbal autopsy, and China disease surveillance data from the cause of death database. Our outlier criteria were to exclude data points that were (1) implausibly high or low relative to global or regional patterns, (2) substantially conflicted with established age or temporal patterns, or (3) significantly conflicted with other data sources based from the same locations or locations with similar characteristics (ie, Socio-demographic Index).

Based on these criteria, we excluded a few data points from China. For males, we outliered data points from all sources in Tibet and data points from China disease surveillance in 1991 in all states, as these led to disproportionately high estimates. For females, we outliered Tibet data points from all sources up to 2007 and China disease surveillance data points in several southern states, ie, Guangxi, Hainan, and Yunnan. In addition, as the vital registration data in Limpopo for both male and female in year 2003 and before are implausibly higher than the other provinces in South Africa, we outliered this data source and kept the data in year 2004-2014 in the analysis. Also, as the vital registration data of mid-age males in Greenland are unrealistically high and much higher than e.g., in Canada and Denmark, the data for males age 45 and above were outliered. Recent years of data from Kazakhstan (2013-2015) were outliered as they presented a discontinuity with previous years which has been ascribed to the country's attempt to reduce deaths due to CVD leading to an increase of deaths from all other causes including rheumatoid arthritis. . Lastly, we outliered ICD9-BTL data from Latin American countries(Ecuador, Costa Rica, El Salvador, Guatemala, Honduras, Nicaragua, Panama, Venezuela, Antigua and Barbuda, The Bahamas, Barbados, Belize, Bermuda, Cuba, Dominica, Grenada, Guyana, Jamaica, Saint Lucia, Saint

Vincent and Grenadines, Suriname and Trinidad and Tobago). The data from these countries in the year that used ICD10 were kept in the analysis.

### Modelling strategy

The standard CODEm modelling approach was applied to estimate deaths due to rheumatoid arthritis. We applied the same covariates used in GBD 2015 but excluded the four covariates for proportions of population at 0-15, 15-30, 30-45, and 45 and over latitudes, which had no observable benefit to the model. We modified the vegetable covariate from kcal/day to gram/day. Otherwise, there were no changes from the GBD 2015 modelling strategy. All the covariates are shown in the following table.

| Level | Covariate                                                   | Direction |
|-------|-------------------------------------------------------------|-----------|
| 1     | Alcohol consumption (litres per capita)                     | +         |
|       | Cumulative cigarettes (10 years)                            | +         |
|       | Cumulative cigarettes (5 years)                             | +         |
|       | Smoking prevalence                                          | +         |
|       | Health care access and quality index                        | -         |
| 2     | Cholesterol (mean per capita)                               | +         |
|       | Vegetable consumption (g per capita)                        | 0         |
| 3     | BMI (mean per capita)                                       | +         |
|       | SDI: Socio-demographic Index                                | 0         |
|       | Log-transformed LDI: lag-distributed income (\$ per capita) | -         |
|       | Education (years per capita)                                | -         |

## Other musculoskeletal disorders

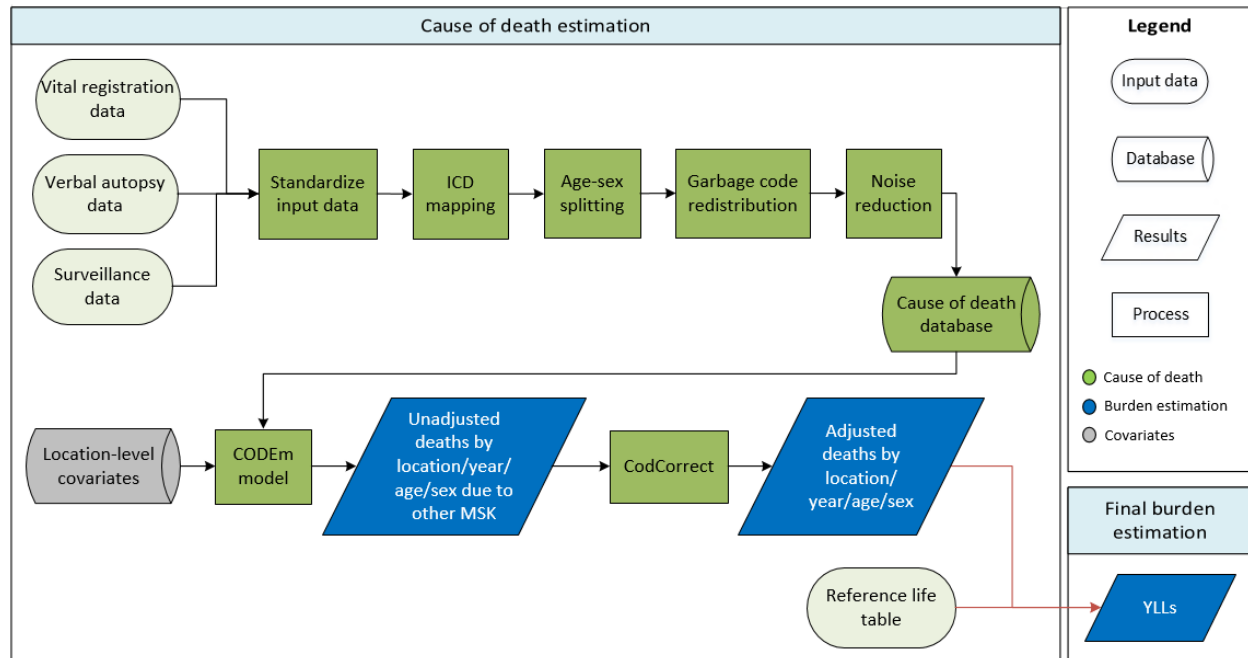

### Input data

Data used to estimate mortality of other musculoskeletal disorders (MSK) included vital registration, verbal autopsy (VA), and China disease surveillance point data from the cause of death database. Our outlier criteria excluded data points that were implausibly high or low relative to global or regional patterns, substantially conflicted with established age or temporal patterns, or significantly conflicted with other data sources based from the same locations or locations with similar characteristics (i.e., socio-demographic index).

Based on these criteria, we excluded VA studies from Eastern and Western sub-Saharan Africa, as VA studies cannot distinguish other MSK deaths and estimates for the regions were disproportionately high. Recent years of data from Kazakhstan (2013–2015) were outliered as they presented a discontinuity with previous years which has been ascribed to the country's attempt to reduce deaths from CVD leading to an increase of deaths from all other causes, including other MSK. We also outliered all data in Latin American countries (Ecuador, Costa Rica, El Salvador, Guatemala, Honduras, Nicaragua, Panama, Venezuela, Antigua and Barbuda, The Bahamas, Barbados, Belize, Bermuda, Cuba, Dominica, Grenada, Guyana, Jamaica, Saint Lucia, Saint Vincent and Grenadines, Suriname and Trinidad and Tobago). The data from these countries in the year that used ICD9-detail or ICD10 were kept in the analysis.

### Modelling strategy

The standard CODEm modelling approach was applied to estimate deaths due to other musculoskeletal disorders. We applied the same covariates used in GBD 2015, excluding the four covariates for proportions of population at 0–15, 15–30, 30–45, and 45 and over latitudes, which had no observable benefit to the model. We modified the vegetable intake covariate from kcal/day to grams/day.

Otherwise, there were no changes from the GBD 2015 modelling strategy. Covariates are shown in the following table.

| Level | Covariate                                                   | Direction |
|-------|-------------------------------------------------------------|-----------|
| 1     | BMI (mean per capita)                                       | +         |
| 2     | Alcohol consumption (litres per capita)                     | +         |
|       | Cumulative cigarettes (10 years)                            | +         |
|       | Cumulative cigarettes (5 years)                             | +         |
|       | Smoking prevalence                                          | +         |
|       | Cholesterol (mean per capita)                               | +         |
|       | Vegetable consumption (g per capita)                        | 0         |
|       | Education (years per capita)                                | 0         |
|       | Log-transformed LDI: lag-distributed income (\$ per capita) | 0         |
|       | Health care access and quality index                        | -         |
| 3     | SDI: Socio-demographic Index                                | 0         |

**Congenital Birth Defects:** *Neural tube defects, Congenital heart anomalies, Orofacial clefts, Down Syndrome, Turner syndrome, Klinefelter syndrome, Other chromosomal disorders, Congenital musculoskeletal anomalies, Urogenital congenital anomalies, Digestive congenital anomalies, and Other congenital birth defects.*

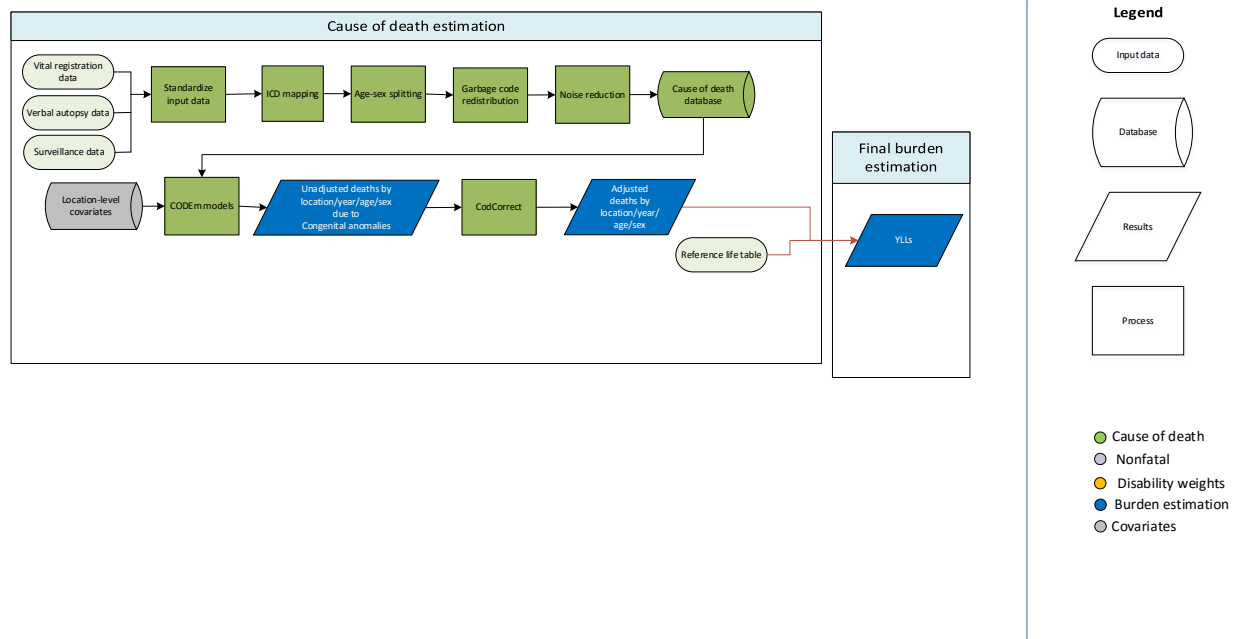

## Input data

For GBD 2016, input data for estimating mortality due to congenital anomalies was centrally extracted, processed, and stored in causes of death (CoD) database. Vital registration (VR) was the dominant data type, followed by verbal autopsy (VA) and surveillance. Those CoD data sources that specified the sub-cause of birth defect were included in estimation of both the parent congenital anomalies model as well as in sub-type-specific models.

For GBD 2016, data exclusions were limited. We outliered all VA data in those over 5 years old as the age patterns were unreliable and led to poor model performance in the under-5 age groups. We also excluded some data sources from the parent model where only a subset of sub-causes were specified (eg, congenital heart disease, neural tube defects, and other congenital anomalies) and the sum of the sub-causes clearly represented systematic underreporting of one of the sub-causes. Systematic underreporting was suspected when sex- and age-specific rates were more than an order of magnitude lower than neighboring or comparable locations. Data sources for those locations were still included by default for sub-cause specific models because under-reporting of the total was not assumed to necessarily be associated with under-reporting of all of the component conditions.

### Modeling strategy

All types of congenital anomalies were estimated using cause of death ensemble modeling (CODEm) for GBD 2016, as was done for previous iterations of the GBD study. Specific causes included neural tube defects, congenital heart anomalies, orofacial clefts, Down Syndrome, other chromosomal anomalies, congenital musculoskeletal anomalies, urogenital congenital anomalies, digestive congenital anomalies, and other congenital birth defects. We assumed no mortality from either Klinefelter syndrome or Turner syndrome, for which we model nonfatal outcomes only. For GBD 2016, we modeled congenital anomalies as a cause of death for ages 0-69 years only, assuming that all mortality from congenital conditions occurs before age 70 years of age.

For GBD 2016, we added three new causes to the congenital anomalies: congenital musculoskeletal and limb anomalies; urogenital congenital anomalies; and digestive congenital anomalies.

### Covariates selected for CODEm model of overall congenital birth defects

| Covariate                                                  | Transformation | Level | Direction     |
|------------------------------------------------------------|----------------|-------|---------------|
| Maternal alcohol consumption during pregnancy (proportion) | None           | 1     | Positive      |
| In-Facility Delivery (proportion)                          | None           | 1     | Negative      |
| Live Births 35+ (proportion)                               | None           | 1     | Positive      |
| Folic acid unadjusted (ug)                                 | None           | 1     | Negative      |
| Legality of Abortion                                       | None           | 2     | Negative      |
| Antenatal Care (1 visit) Coverage (proportion)             | None           | 2     | Not specified |
| Smoking Prevalence (Reproductive Age Standardized)         | None           | 2     | Positive      |
| Antenatal Care (4 visits) Coverage (proportion)            | None           | 2     | Negative      |
| Healthcare access and quality index                        | None           | 2     | Negative      |
| Education (years per capita)                               | None           | 2     | Negative      |
| Alcohol (liters per capita)                                | None           | 3     | Positive      |
| fruits unadjusted(g)                                       | None           | 3     | Positive      |
| Outdoor Air Pollution (PM2.5)                              | None           | 3     | Positive      |
| Indoor Air Pollution (All Cooking Fuels)                   | None           | 3     | Positive      |
| Socio-demographic Index                                    | None           | 3     | Negative      |
| vegetables unadjusted(g)                                   | None           | 3     | Positive      |

### Covariates selected for CODEm model of neural tube defects

| Covariate                           | Transformation | Level | Direction |
|-------------------------------------|----------------|-------|-----------|
| Health System Access (capped)       | None           | 1     | Negative  |
| fruits adjusted(g)                  | None           | 2     | Negative  |
| vegetables adjusted(g)              | None           | 2     | Negative  |
| Healthcare access and quality index | None           | 2     | Negative  |
| Education (years per capita)        | None           | 3     | Negative  |
| LDI (I\$ per capita)                | Log            | 3     | Negative  |



|                         |      |   |          |
|-------------------------|------|---|----------|
| Socio-demographic Index | None | 3 | Negative |
|-------------------------|------|---|----------|

#### Covariates selected for CODEm model of congenital heart anomalies

| Covariate                                                  | Transformation | Level | Direction |
|------------------------------------------------------------|----------------|-------|-----------|
| Maternal alcohol consumption during pregnancy (proportion) | None           | 1     | Positive  |
| Socio-demographic Index                                    | Log            | 2     | Negative  |
| Smoking Prevalence (Reproductive Age Standardized)         | None           | 2     | Positive  |
| Diabetes Age-Standardized Prevalence (proportion)          | None           | 2     | Positive  |
| Healthcare access and quality index                        | None           | 2     | Negative  |
| Legality of Abortion                                       | None           | 2     | Negative  |
| Antenatal Care (1 visit) Coverage (proportion)             | None           | 2     | Negative  |
| In-Facility Delivery (proportion)                          | None           | 2     | Negative  |
| Education (years per capita)                               | None           | 2     | Negative  |
| Alcohol (liters per capita)                                | None           | 3     | Positive  |
| Antenatal Care (4 visits) Coverage (proportion)            | None           | 3     | Negative  |
| Skilled Birth Attendance (proportion)                      | None           | 3     | Negative  |
| Live Births 35+ (proportion)                               | None           | 3     | Positive  |

#### Covariates selected for CODEm model of cleft lip and cleft palate

| Covariate                                                  | Transformation | Level | Direction     |
|------------------------------------------------------------|----------------|-------|---------------|
| Indoor Air Pollution (All Cooking Fuels)                   | None           | 1     | Positive      |
| Diabetes Age-Standardized Prevalence (proportion)          | None           | 2     | Positive      |
| Maternal alcohol consumption during pregnancy (proportion) | None           | 2     | Positive      |
| Healthcare access and quality index                        | None           | 2     | Negative      |
| Outdoor Air Pollution (PM2.5)                              | None           | 2     | Positive      |
| Legality of Abortion                                       | None           | 2     | Negative      |
| Skilled Birth Attendance (proportion)                      | None           | 2     | Negative      |
| Smoking Prevalence (Reproductive Age Standardized)         | None           | 2     | Positive      |
| vegetables unadjusted(g)                                   | None           | 3     | Not specified |
| Alcohol (liters per capita)                                | None           | 3     | Positive      |
| Antenatal Care (4 visits) Coverage (proportion)            | None           | 3     | Negative      |
| Education (years per capita)                               | None           | 3     | Negative      |
| fruits unadjusted(g)                                       | None           | 3     | Not specified |
| Antenatal Care (1 visit) Coverage (proportion)             | None           | 3     | Negative      |

### Covariates selected for CODEm model of Down Syndrome

| Covariate                                                  | Transformation | Level | Direction |
|------------------------------------------------------------|----------------|-------|-----------|
| Live Births 35+ (proportion)                               | None           | 1     | Positive  |
| Legality of Abortion                                       | None           | 1     | Negative  |
| Live Births 40+ (proportion)                               | None           | 1     | Positive  |
| Socio-demographic Index                                    | None           | 2     | Negative  |
| LDI (I\$ per capita)                                       | Log            | 2     | Negative  |
| In-Facility Delivery (proportion)                          | None           | 2     | Negative  |
| Healthcare access and quality index                        | None           | 2     | Negative  |
| Maternal alcohol consumption during pregnancy (proportion) | None           | 3     | Positive  |
| Antenatal Care (1 visit) Coverage (proportion)             | None           | 3     | Negative  |
| Education (years per capita)                               | None           | 3     | Negative  |
| Indoor Air Pollution (All Cooking Fuels)                   | None           | 3     | Positive  |
| Antenatal Care (4 visits) Coverage (proportion)            | None           | 3     | Negative  |
| vegetables unadjusted(g)                                   | None           | 3     | Negative  |
| Smoking Prevalence (Reproductive Age Standardized)         | None           | 3     | Positive  |

### Covariates selected for CODEm model of other chromosomal abnormalities

| Covariate                                                  | Transformation | Level | Direction     |
|------------------------------------------------------------|----------------|-------|---------------|
| Live Births 35+ (proportion)                               | None           | 1     | Positive      |
| Live Births 40+ (proportion)                               | None           | 1     | Positive      |
| Legality of Abortion                                       | None           | 1     | Negative      |
| LDI (I\$ per capita)                                       | Log            | 2     | Negative      |
| Healthcare access and quality index                        | None           | 2     | Negative      |
| Antenatal Care (4 visits) Coverage (proportion)            | None           | 2     | Negative      |
| Antenatal Care (1 visit) Coverage (proportion)             | None           | 2     | Negative      |
| In-Facility Delivery (proportion)                          | None           | 2     | Negative      |
| Maternal alcohol consumption during pregnancy (proportion) | None           | 2     | Positive      |
| Socio-demographic Index                                    | None           | 3     | Not specified |
| Alcohol (liters per capita)                                | None           | 3     | Positive      |
| Smoking Prevalence (Reproductive Age Standardized)         | None           | 3     | Positive      |
| Education (years per capita)                               | None           | 3     | Negative      |
| Skilled Birth Attendance (proportion)                      | None           | 3     | Negative      |

### Covariates selected for CODEm model of congenital musculoskeletal and limb anomalies

| Covariate                                                  | Transformation | Level | Direction |
|------------------------------------------------------------|----------------|-------|-----------|
| Maternal alcohol consumption during pregnancy (proportion) | None           | 1     | Positive  |
| Legality of Abortion                                       | None           | 1     | Negative  |
| In-Facility Delivery (proportion)                          | None           | 2     | Negative  |
| Diabetes Age-Standardized Prevalence (proportion)          | None           | 2     | Positive  |
| Socio-demographic Index                                    | None           | 2     | Negative  |
| Healthcare access and quality index                        | None           | 2     | Negative  |
| Indoor Air Pollution (All Cooking Fuels)                   | None           | 2     | Positive  |

|                                                    |      |   |               |
|----------------------------------------------------|------|---|---------------|
| Smoking Prevalence (Reproductive Age Standardized) | None | 2 | Positive      |
| Antenatal Care (4 visits) Coverage (proportion)    | None | 3 | Negative      |
| Alcohol (liters per capita)                        | None | 3 | Positive      |
| vegetables unadjusted(g)                           | None | 3 | Not specified |
| fruits unadjusted(g)                               | None | 3 | Not specified |
| Education (years per capita)                       | None | 3 | Negative      |
| Antenatal Care (1 visit) Coverage (proportion)     | None | 3 | Negative      |

#### Covariates selected for CODEm model of urogenital congenital anomalies

| Covariate                                                  | Transformation | Level | Direction |
|------------------------------------------------------------|----------------|-------|-----------|
| Smoking Prevalence (Reproductive Age Standardized)         | None           | 1     | Positive  |
| Maternal alcohol consumption during pregnancy (proportion) | None           | 1     | Positive  |
| Healthcare access and quality index                        | None           | 2     | Negative  |
| Diabetes Age-Standardized Prevalence (proportion)          | None           | 2     | Positive  |
| Socio-demographic Index                                    | None           | 2     | Negative  |
| Outdoor Air Pollution (PM2.5)                              | None           | 2     | Positive  |
| In-Facility Delivery (proportion)                          | None           | 2     | Negative  |
| Indoor Air Pollution (All Cooking Fuels)                   | None           | 2     | Positive  |
| Antenatal Care (1 visit) Coverage (proportion)             | None           | 3     | Negative  |
| Alcohol (liters per capita)                                | None           | 3     | Positive  |
| Education (years per capita)                               | None           | 3     | Negative  |
| LDI (I\$ per capita)                                       | Log            | 3     | Negative  |
| Antenatal Care (4 visits) Coverage (proportion)            | None           | 3     | Negative  |

#### Covariates selected for CODEm model of digestive congenital anomalies

| Covariate                                                  | Transformation | Level | Direction     |
|------------------------------------------------------------|----------------|-------|---------------|
| Maternal alcohol consumption during pregnancy (proportion) | None           | 1     | Positive      |
| Smoking Prevalence (Reproductive Age Standardized)         | None           | 1     | Positive      |
| Indoor Air Pollution (All Cooking Fuels)                   | None           | 2     | Positive      |
| Diabetes Age-Standardized Prevalence (proportion)          | None           | 2     | Positive      |
| Socio-demographic Index                                    | None           | 2     | Negative      |
| Prevalence of obesity (age-standardized)                   | None           | 2     | Positive      |
| In-Facility Delivery (proportion)                          | None           | 2     | Negative      |
| Healthcare access and quality index                        | None           | 2     | Negative      |
| Alcohol (liters per capita)                                | None           | 3     | Positive      |
| Health System Access (capped)                              | None           | 3     | Negative      |
| Education (years per capita)                               | None           | 3     | Negative      |
| vegetables unadjusted(g)                                   | None           | 3     | Not specified |
| Antenatal Care (1 visit) Coverage (proportion)             | None           | 3     | Negative      |
| Antenatal Care (4 visits) Coverage (proportion)            | None           | 3     | Negative      |
| fruits unadjusted(g)                                       | None           | 3     | Not specified |
| LDI (I\$ per capita)                                       | Log            | 3     | Negative      |

**Covariates selected for CODEm model of other congenital birth defects**

| <b>Covariate</b>                                           | <b>Transformation</b> | <b>Level</b> | <b>Direction</b> |
|------------------------------------------------------------|-----------------------|--------------|------------------|
| Maternal alcohol consumption during pregnancy (proportion) | None                  | 1            | Positive         |
| Live Births 35+ (proportion)                               | None                  | 1            | Positive         |
| Education (years per capita)                               | None                  | 2            | Negative         |
| Smoking Prevalence (Reproductive Age Standardized)         | None                  | 2            | Positive         |
| Legality of Abortion                                       | None                  | 2            | Negative         |
| In-Facility Delivery (proportion)                          | None                  | 2            | Negative         |
| Indoor Air Pollution (All Cooking Fuels)                   | None                  | 2            | Positive         |
| Healthcare access and quality index                        | None                  | 2            | Negative         |
| Antenatal Care (1 visit) Coverage (proportion)             | None                  | 3            | Negative         |
| Diabetes Age-Standardized Prevalence (proportion)          | None                  | 3            | Positive         |
| LDI (I\$ per capita)                                       | Log                   | 3            | Negative         |
| Socio-demographic Index                                    | None                  | 3            | Negative         |
| Antenatal Care (4 visits) Coverage (proportion)            | None                  | 3            | Negative         |
| Alcohol (liters per capita)                                | None                  | 3            | Positive         |

## Skin and subcutaneous diseases

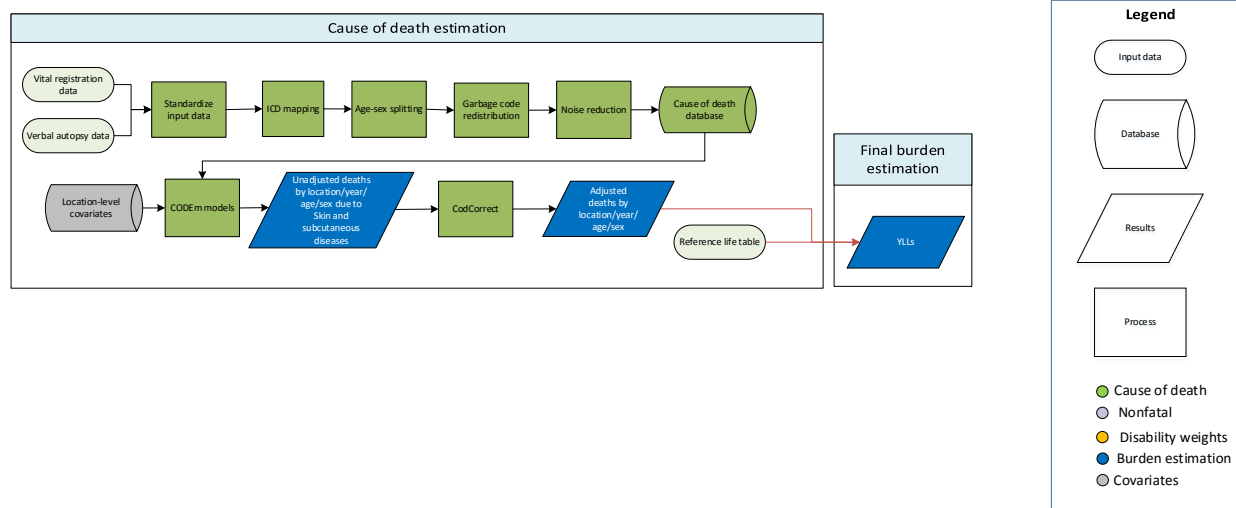

### Input data

Data used to estimate mortality of skin and subcutaneous diseases consisted of vital registration data and verbal autopsy data from the cause of death (COD) database. Outlier criteria excluded data points that were implausibly high or low relative to global or regional patterns and data from countries with small populations. The data in skin and subcutaneous diseases consists of aggregated data from all other specific skin diseases, as well as unique data points from unspecified codes of skin and subcutaneous disease.

### Modelling strategy

We modelled deaths due to skin and subcutaneous diseases with a standard CODEm model using the cause of death database and location-level covariates as inputs. The model followed standard parameters, with the exception that the start age of the model was 28 days instead of 0. We hybridized separate global and data-rich models to acquire unadjusted results, which we finalized and adjusted using CodCorrect to reach final years of life lost (YLLs) due to skin and subcutaneous diseases. In GBD 2016 we added the healthcare access and quality index (HAQI) covariate to the model.

| Covariate                                      | Level | Direction |
|------------------------------------------------|-------|-----------|
| Alcohol (liters per capita)                    | 2     | 1         |
| Cumulative cigarettes (10 years)               | 2     | 1         |
| Cumulative cigarettes (5 years)                | 2     | 1         |
| Education (years per capita)                   | 3     | -1        |
| Lag distributed income (per capita)            | 3     | -1        |
| Smoking prevalence                             | 2     | 1         |
| Improved water source (proportion with access) | 1     | -1        |
| Unsafe sanitation (summary exposure variable)  | 1     | 1         |
| Sociodemographic index                         | 3     | 0         |
| Health access and quality index                | 2     | -1        |

## Cellulitis

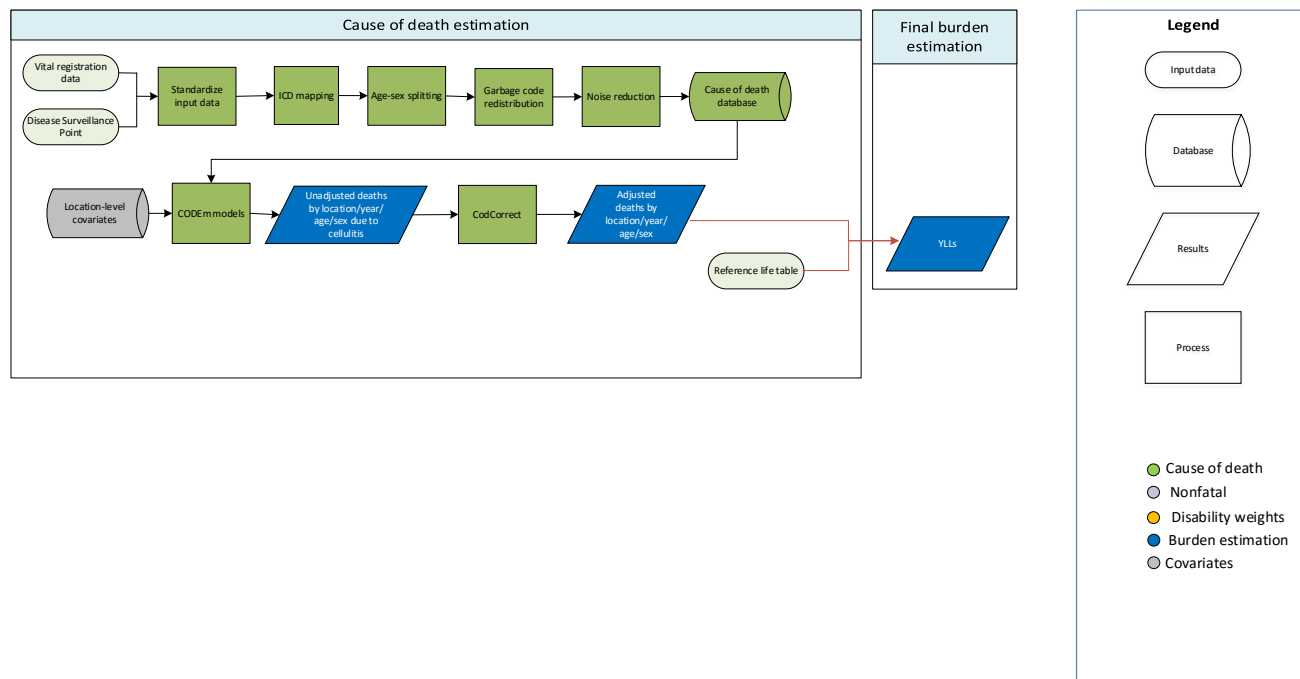

### Input data

Data used to estimate cellulitis mortality consisted of vital registration and Chinese disease surveillance point (DSP) data from the cause of death (COD) database. Outlier criteria excluded data points that were implausibly high or low relative to global or regional patterns and data from countries with small populations.

### Modeling strategy

The standard CODEm modeling approach was used to estimate deaths due to cellulitis. CODEm parameters were centrally defined. COD models were evaluated by comparing age-standardized death rates per 100,000 people to the GBD 2015 best model for 1990 and 2015 – individually for males and females. We also compared the age-standardized annualized rate of change for death rates per 100,000 persons to GBD 2015.

Compared to GBD 2015, we reduced the number of covariates for GBD 2016.

| Covariate                           | Level | Direction |
|-------------------------------------|-------|-----------|
| Education (years per capita)        | 3     | 0         |
| Log LDI (I\$ per capita)            | 3     | 0         |
| Healthcare access and quality index | 2     | -1        |

# Pyoderma

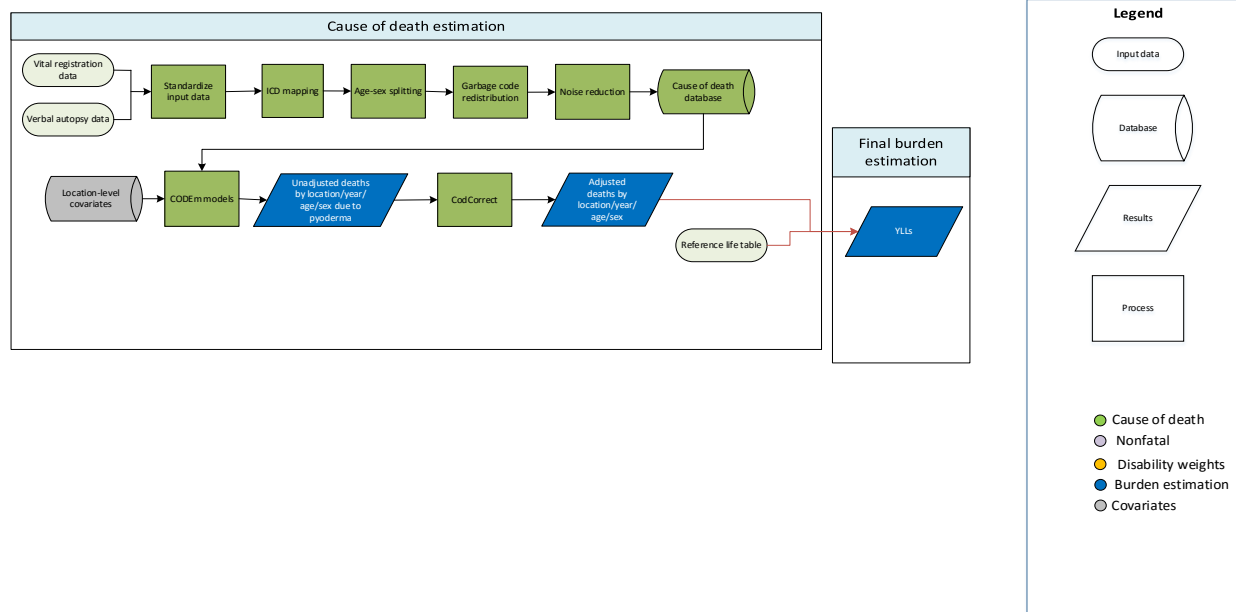

## Input data

Data used to estimate pyoderma mortality included centrally prepped vital registration and verbal autopsy data from the cause of death (COD) database. Outlier criteria excluded data points that were implausibly high or low relative to global or regional patterns and data from countries with small populations.

## Modelling strategy

We modelled deaths due to pyoderma with a standard CODEm model using the cause of death database and location-level covariates as inputs. The model followed standard parameters. We hybridized separate global and data-rich models to acquire unadjusted results, which we finalized and adjusted using CodCorrect to reach final years of life lost (YLLs) due to pyoderma. In GBD 2016 we added the healthcare access and quality index (HAQI) covariate to the model.

| Covariate                                      | Level | Direction |
|------------------------------------------------|-------|-----------|
| Alcohol (liters per capita)                    | 2     | 1         |
| Cumulative cigarettes (10 years)               | 2     | 1         |
| Cumulative cigarettes (5 years)                | 2     | 1         |
| Education (years per capita)                   | 3     | -1        |
| Lag distributed income (per capita)            | 3     | -1        |
| Smoking prevalence                             | 2     | 1         |
| Improved water source (proportion with access) | 1     | -1        |
| Unsafe sanitation (summary exposure variable)  | 1     | 1         |
| Sociodemographic index                         | 3     | 0         |
| Health access and quality index                | 2     | -1        |

## Decubitus ulcer

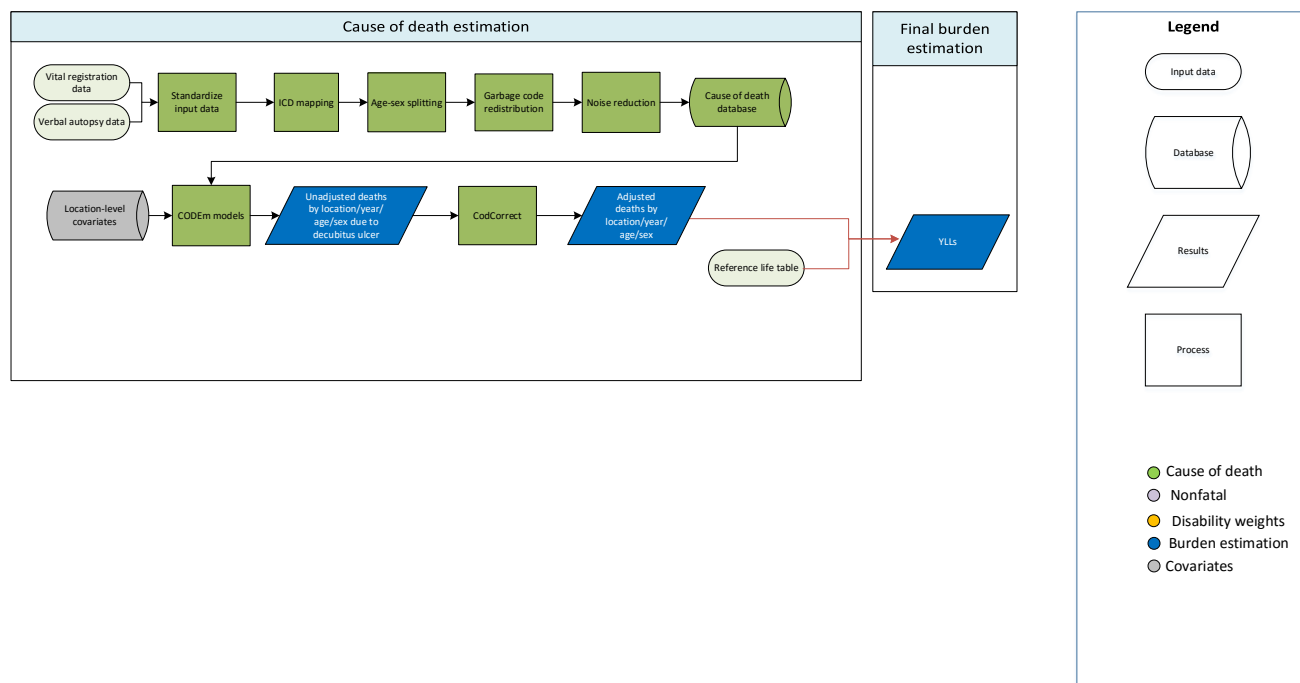

### Input data

Data used to estimate decubitus ulcer mortality consisted of vital registration sources and verbal autopsy sources from the cause of death (COD) database. Outlier criteria excluded data points that were implausibly high or low relative to global or regional patterns and data from countries with small populations.

### Modelling strategy

The standard CODEm modelling approach was used to estimate deaths due to decubitus ulcer. CODEm parameters were centrally defined. COD models were evaluated by comparing age-standardized death rates per 100,000 people to the GBD 2015 best model for 1990 and 2015 – individually for males and females. We also compared the age-standardized annualized rate of change for death rates per 100,000 persons to GBD 2015.

Decubitus ulcer death estimates were corrected for misclassification of Alzheimer and Parkinson disease deaths.

| Covariate                                      | Level | Direction |
|------------------------------------------------|-------|-----------|
| Alcohol (litres per capita)                    | 2     | 1         |
| Cumulative cigarettes (5 years)                | 2     | 1         |
| Cumulative cigarettes (10 years)               | 2     | 1         |
| Education (years per capita)                   | 3     | -1        |
| Health system access 2                         | 3     | -1        |
| Log LDI (I\$ per capita)                       | 3     | -1        |
| Smoking prevalence                             | 2     | 1         |
| Improved water source (proportion with access) | 1     | -1        |



|                                                                   |   |    |
|-------------------------------------------------------------------|---|----|
| Standardized Exposure Variable (SEV) scalar for unsafe sanitation | 1 | 1  |
| Socio-demographic Index                                           | 3 | 0  |
| Healthcare access and quality index                               | 2 | -1 |

---

## Other skin and subcutaneous diseases

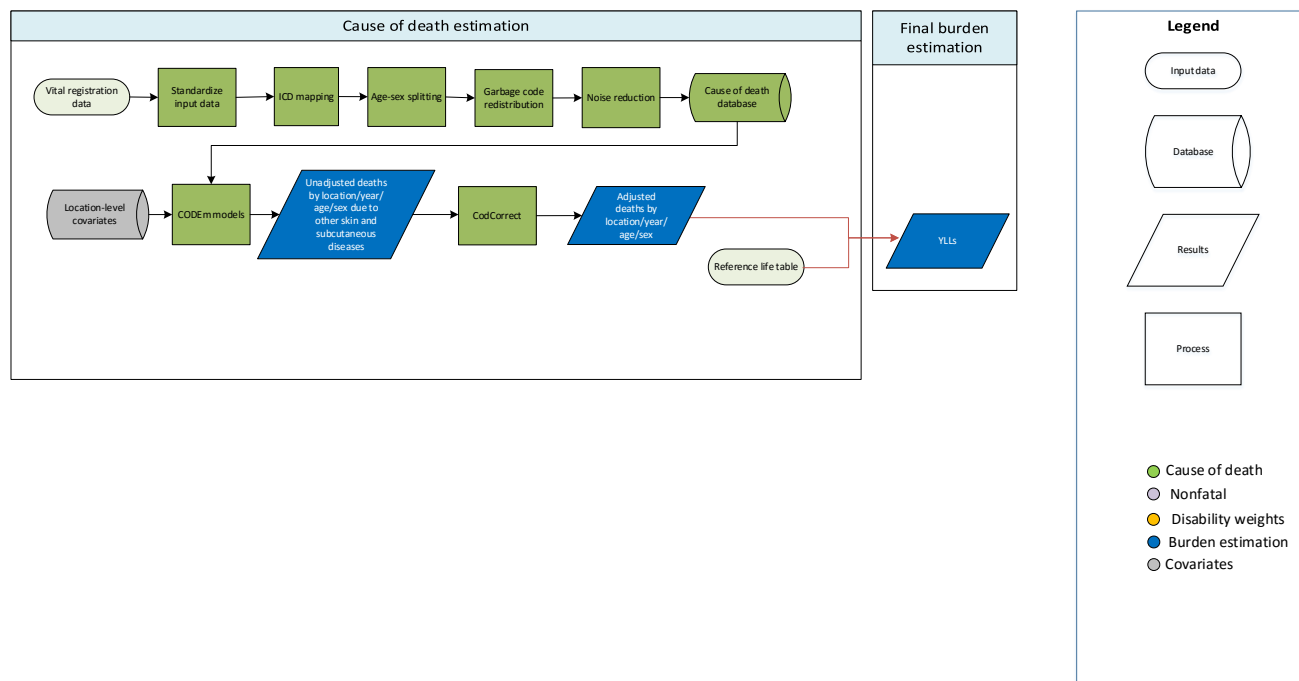

### Input data

Data used to estimate mortality due to other skin and subcutaneous diseases consisted of vital registration data from the cause of death (COD) database. We outliered data in instances where garbage code redistribution and noise reduction, in combination with small sample sizes, resulted in unreasonable cause fractions; and data that violated well-established time or age trends.

### Modelling strategy

The standard CODEm modelling approach was used to estimate deaths due to other skin and subcutaneous diseases. CODEm parameters were centrally defined. COD models were evaluated by comparing age-standardized death rates per 100,000 people to the GBD 2015 best model for 1990 and 2015 – individually for males and females. We also compared the age-standardized annualized rate of change for death rates per 100,000 people to GBD 2015.

There were no significant changes in the modelling process between GBD 2015 and GBD 2016.

| Covariate                                              | Level | Direction |
|--------------------------------------------------------|-------|-----------|
| Alcohol (litres per capita)                            | 2     | 1         |
| Cumulative cigarettes (5 years)                        | 2     | 1         |
| Cumulative cigarettes (10 years)                       | 2     | 1         |
| Education (years per capita)                           | 3     | -1        |
| Health system access 2                                 | 3     | -1        |
| Log LDI (I\$ per capita)                               | 3     | -1        |
| Underweight (proportion <2SD weight for age, <5 years) | 1     | 1         |
| Smoking prevalence                                     | 2     | 1         |
| Improved water source (proportion with access)         | 1     | -1        |

|                                                                   |   |    |
|-------------------------------------------------------------------|---|----|
| Standardized Exposure Variable (SEV) scalar for unsafe sanitation | 1 | 1  |
| Socio-demographic Index                                           | 3 | 0  |
| Healthcare access and quality index                               | 2 | -1 |

---

## Sudden Infant Death Syndrome (SIDS)

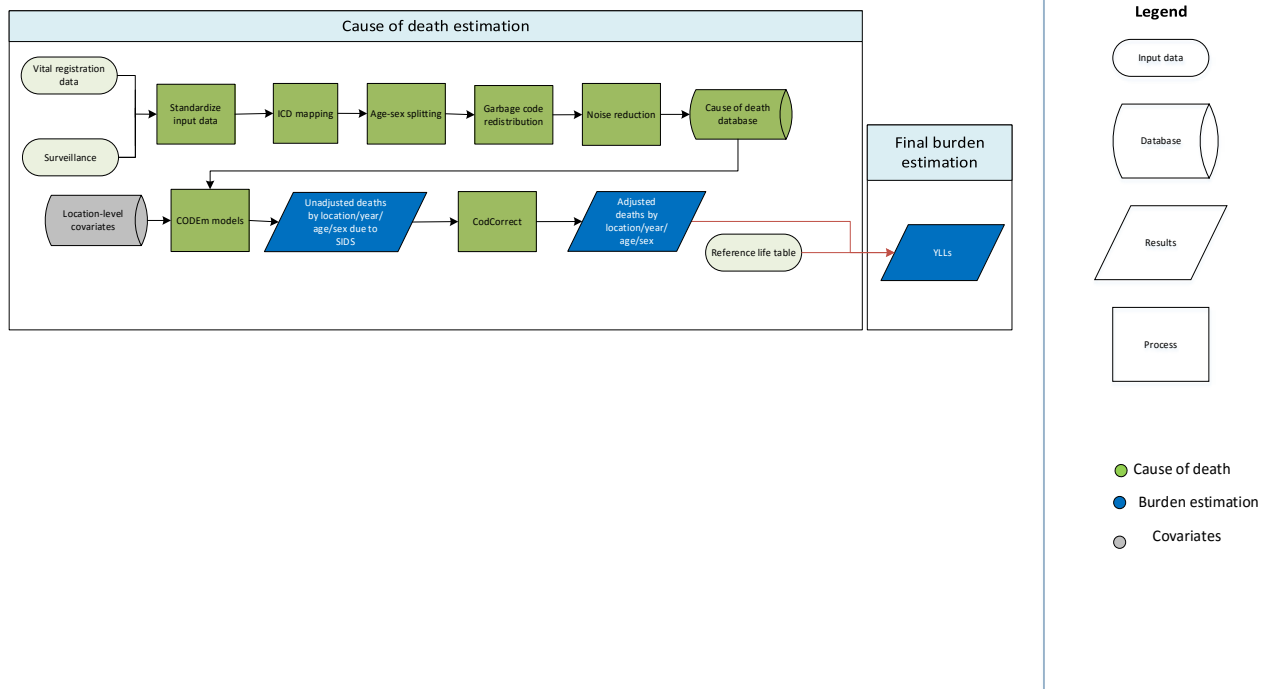

### Input data

Vital registration data were used to estimate deaths due to sudden infant death syndrome (SIDS). Data points were selected as outliers if they met the following criteria: (1) implausibly high values relative to country time trends or global or regional patterns, based on the assumption that there are not “outbreaks” of SIDS, or (2) substantially conflicting with established age or temporal patterns.

### Modelling strategy

The standard CODEm modelling approach was applied to estimate deaths due to SIDS. We ran CODEm models for ages 7–27 days and 28–364 days because we believe that deaths assigned to SIDS in other age groups are mis-assigned and are therefore treated as garbage codes. Surveillance data and verbal autopsy data were not used as inputs to this model because these sources do not use data collection methods that can accurately diagnose deaths due to SIDS.

Notable differences between the GBD 2013 and GBD 2015 strategy included updates across the board to smoking-related covariates, total fertility rate, and Socio-demographic Index covariates. The addition of American Samoa to the Oceania region was also of note, as well as the shift to including more ICD detail codes in the input data for some countries that previously reported only aggregated codes.

There were no significant changes in strategy from GBD 2015 to GBD 2016.

## Injuries

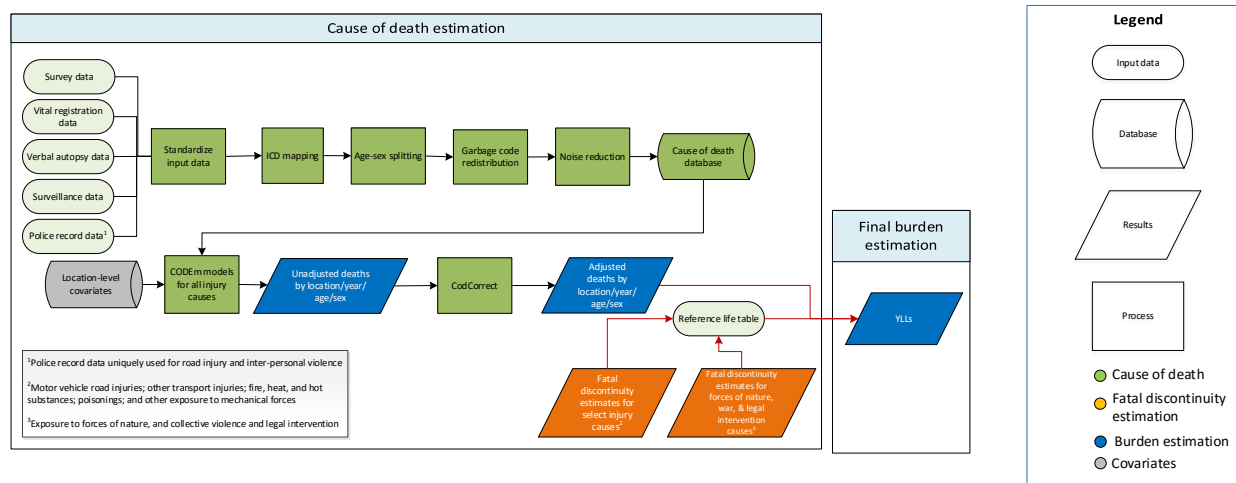

### Input data

In GBD 2016, we estimated injury mortality from vital registration, verbal autopsy, mortality surveillance, censuses, surveys, and police record data. Police and crime reports were data sources uniquely used for the estimation of deaths from road traffic injury and interpersonal violence. The police data were collected from published studies, national agencies, and institutional surveys such as the United Nations Crime Trends Survey and the WHO Global Status Report on Road Safety Survey. For countries with vital registration data we did not use police records, except if the recorded number of road injury and interpersonal violence deaths from police records exceeded that in the vital registration.

Infrequently, data points were marked as outliers. Outlier criteria excluded data points that (1) were implausibly high or low relative to global or regional patterns, (2) substantially conflicted with established age or temporal patterns, or (3) significantly conflicted with other data sources conducted from the same locations or locations with similar characteristics (ie, Socio-demographic Index).

### Modelling strategy

#### Overview

In GBD 2016, the standard CODEm modelling approach was applied to estimate deaths due to all causes of injury, excluding “Exposure to forces of nature,” “Military operations and terrorism,” and “State actor violence,” which fall under the aggregate cause “Forces of nature, military operations and terrorism, and state actor violence.” These causes were modelled solely outside of the CODEm process as fatal discontinuities estimation; this process is detailed further in the section on fatal discontinuities estimation in the appendix.

Fatal discontinuity was estimated for five injury causes also modeled in CODEm. These causes included “Motor vehicle road injuries,” “Other transport injuries,” “Fire, heat, and hot substances,” “Poisonings,” and “Other exposure to mechanical forces.” Final fatal discontinuity estimations for these causes were merged with CODEm results post-CoDCorrect to produce final cause of death results.

Refer to the Table at the end of this section for a complete list of the cause-of-injury categories, modelling strategies, and covariate changes from GBD 2015.

#### GBD injury codes and categories

The International Classification of Diseases (ICD) was used to classify injuries. In GBD, injury incidence and death are defined as ICD-9 codes E000-E999 and ICD-10 chapters V to Y. There is one exception: deaths and cases of alcohol poisoning and drug overdoses are classified under drug and alcohol use disorders. In GBD 2016, injury causes were organized into 26 mutually exclusive and collectively exhaustive external cause-of-injury categories. For GBD 2016, “Self-harm” was distinguished into “Self-harm by firearm,” and “Self-harm by other specified means.”

#### Preparation of data

The preparation of cause of death data includes age splitting, age-sex splitting, smoothing, and outlier detection. These steps are described in detail by Naghavi et al and Lozano et al.<sup>1,2,3</sup> The concept of “garbage codes” and redistribution of these codes was proposed in GBD 1990.<sup>4</sup> Garbage codes are causes of death that should not be identified as specific underlying causes of death but have been entered as the underlying cause of death on death certificates. A classic example of these types of codes in injuries chapters are “Exposure to unspecified factor” (X59 in ICD-10 and E887 in ICD-9) and all undetermined intent codes (Y10-Y34 in ICD-10 and E980-E988 in ICD-9). Other examples of garbage codes in injuries are the coding of an injury death to intermediate codes like septicemia or peritonitis or as an ill-defined and unknown cause of mortality (R99). Approximately 2% of total deaths in countries with vital registration data are assigned to these three injury garbage code categories.

#### Splitting into sublevel causes

In countries with non-detail ICD code data, cause-of-injury categories were proportionally split into sublevel cause-of-injury categories. The sublevel cause-of-injury causes were created in the CoDCorrect process. One of the countries with non-detail ICD code data is South Africa, and in GBD 2013 the proportions of sublevel cause-of-injury were based on vital registration data. For GBD iterations of 2015 and 2016 the proportions were based on post-mortem investigation of injury deaths as described in the paper by Matzopoulos et al. 2015.<sup>5</sup>

#### Limitations and model assumptions

We added police data for road injuries and interpersonal violence to help predict level and age patterns in countries with sparse or absent cause of death data even though we know from countries with near-complete vital registration data that police records tend to underestimate the true level of deaths. However, we applied police data estimates in instances where reported deaths were higher than vital registration numbers.

For the cause-of-injury category “Unintentional suffocation” we suspect that varying practices in coding deaths to sudden infant death syndrome (which end up in “Unintentional suffocation”) can explain some of the differences we see and we plan to explore that further in the next iteration of GBD.

| <b>Table – Injury Cause List</b> |                                                                               |                                          |                                                 |
|----------------------------------|-------------------------------------------------------------------------------|------------------------------------------|-------------------------------------------------|
| <b>ID</b>                        | <b>Cause</b>                                                                  | <b>Modelling Strategy</b>                | <b>Covariate changes from GBD 2015</b>          |
| 1                                | Transport injuries                                                            | CODEm                                    |                                                 |
| 1.1                              | Road injuries                                                                 | CODEm                                    |                                                 |
| 1.1.a                            | Pedestrian road injuries                                                      | CODEm                                    |                                                 |
| 1.1.b                            | Cyclist road injuries                                                         | CODEm                                    |                                                 |
| 1.1.c                            | Motorcyclist road injuries                                                    | CODEm                                    |                                                 |
| 1.1.d                            | Motor vehicle road injuries                                                   | CODEm and fatal discontinuity estimation |                                                 |
| 1.1.e                            | Other road injuries                                                           | CODEm                                    |                                                 |
| 1.2                              | Other transport injuries                                                      | CODEm and fatal discontinuity estimation |                                                 |
| 2                                | Unintentional injuries                                                        | CODEm                                    |                                                 |
| 2.1                              | Falls                                                                         | CODEm                                    |                                                 |
| 2.2                              | Drowning                                                                      | CODEm                                    |                                                 |
| 2.3                              | Fire, heat, and hot substances                                                | CODEm and fatal discontinuity estimation |                                                 |
| 2.4                              | Poisonings                                                                    | CODEm and fatal discontinuity estimation |                                                 |
| 2.5                              | Exposure to mechanical forces                                                 | CODEm                                    |                                                 |
| 2.5.a                            | Unintentional firearm injuries                                                | CODEm                                    |                                                 |
| 2.5.b                            | Unintentional suffocation                                                     | CODEm                                    |                                                 |
| 2.5.c                            | Other exposure to mechanical forces                                           | CODEm and fatal discontinuity estimation |                                                 |
| 2.6                              | Adverse effects of medical treatment                                          | CODEm                                    |                                                 |
| 2.7                              | Animal contact                                                                | CODEm                                    |                                                 |
| 2.7.a                            | Venomous animal contact                                                       | CODEm                                    |                                                 |
| 2.7.b                            | Non-venomous animal contact                                                   | CODEm                                    |                                                 |
| 2.8                              | Foreign body                                                                  | CODEm                                    |                                                 |
| 2.8.a                            | Pulmonary aspiration and foreign body in airway                               | CODEm                                    |                                                 |
| 2.8.b                            | Foreign body in other body part                                               | CODEm                                    |                                                 |
| 2.9                              | Environmental exposure to heat and cold                                       | CODEm                                    |                                                 |
| 2.10                             | Other unintentional injuries                                                  | CODEm                                    |                                                 |
| 3                                | Self-harm and interpersonal violence                                          | CODEm                                    |                                                 |
| 3.1                              | Self-harm                                                                     | CODEm                                    |                                                 |
| 3.1.1                            | Self-harm by firearm                                                          | CODEm                                    | Same covariates used as self-harm from GBD 2015 |
| 3.1.2                            | Self-harm by other specified means                                            | CODEm                                    | Same covariates used as self-harm from GBD 2015 |
| 3.2                              | Interpersonal violence                                                        | CODEm                                    |                                                 |
| 3.2.a                            | Assault by firearm                                                            | CODEm                                    |                                                 |
| 3.2.b                            | Assault by sharp object                                                       | CODEm                                    |                                                 |
| 3.2.c                            | Assault by other means                                                        | CODEm                                    |                                                 |
| 4                                | Forces of nature, military operations and terrorism, and state actor violence |                                          |                                                 |

| Table – Injury Cause List |                                   |                                                                                    |                                 |
|---------------------------|-----------------------------------|------------------------------------------------------------------------------------|---------------------------------|
| ID                        | Cause                             | Modelling Strategy                                                                 | Covariate changes from GBD 2015 |
| 4.1                       | Exposure to forces of nature      | Fatal discontinuity estimation for disaster (appended post-CoDCorrect)             | N/A                             |
| 4.2                       | State actor violence              | Fatal discontinuity estimation for state actor violence (appended post-CoDCorrect) | N/A                             |
| 4.3                       | Military operations and terrorism | Fatal discontinuity estimation for state actor violence (appended post-CoDCorrect) | N/A                             |

**References**

1 Lozano R, Naghavi M, Foreman K, *et al.* Global and regional mortality from 235 causes of death for 20 age groups in 1990 and 2010: a systematic analysis for the Global Burden of Disease Study 2010. *The Lancet* 2012; **380**: 2095–128.

2 Global, regional, and national age–sex specific all-cause and cause-specific mortality for 240 causes of death, 1990–2013: a systematic analysis for the Global Burden of Disease Study 2013. *The Lancet* 2015; **385**: 117–71.

3 Global, regional, and national life expectancy, all-cause mortality, and cause-specific mortality for 249 causes of death, 1980-2015: a systematic analysis for the Global Burden of Disease Study 2015. *The Lancet* 2016; **388**: 1459-1544.

4 Murray CJL, Lopez AD, Harvard School of Public Health, World Health Organization, World Bank. The global burden of disease: a comprehensive assessment of mortality and disability from diseases, injuries, and risk factors in 1990 and projected to 2020. Cambridge, MA: Published by the Harvard School of Public Health on behalf of the World Health Organization and the World Bank : Distributed by Harvard University Press, 1996.

5 Matzopoulos R, Prinsloo M, Wyk VP, Gwebushe N, Mathews S, *et al.* Injury-related mortality in South Africa: a retrospective descriptive study of postmortem investigations. *Bull World Health Organ* 2015; **93**: 303–13.



## Fatal Discontinuities

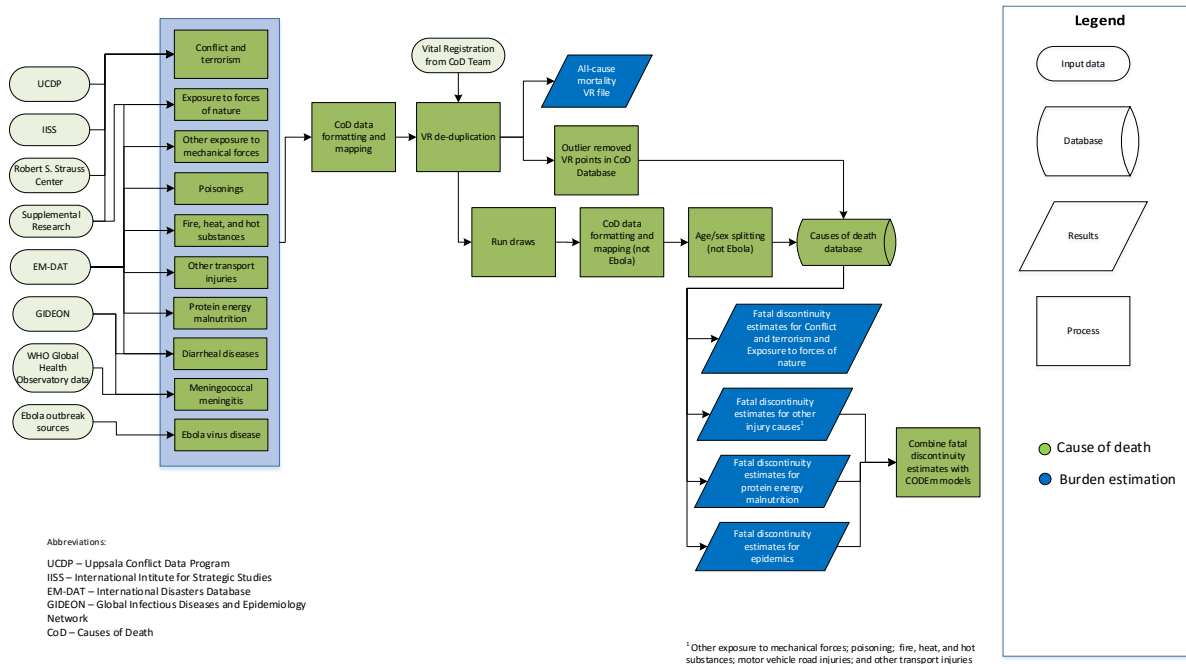

### Input data

#### Overall

Input data for fatal discontinuities are compiled a range of sources, including country vital registration (VR) data; international diseases databases that capture several cause-specific fatal discontinuities; and supplemental data in the presence of known issues with data quality or representativeness, or time lags in reporting. A systematic literature review was not used to identify input data for fatal discontinuities, though some literature sources were identified through online supplemental research. Below we provide more detail on the different input data sources by sub-causes of fatal discontinuities.

#### Subnational locations and population splitting

In locations where we produced estimates at the subnational level for GBD 2016, deaths due to all fatal discontinuity causes were assigned to the relevant subnational location(s) when that information could be obtained either through country data sources (e.g., VR) or through additional online research. If no subnational location could be found, the deaths were split proportionally by population across all subnational locations.

In locations that have experienced boundary changes or split from other locations that we currently estimate (e.g., the former Yugoslavia, Czechoslovakia, the Soviet Union, Sudan and South Sudan), we split deaths due to events that occurred prior to boundary changes proportionally based on the populations residing within the boundaries of present-day locations unless we found documentation that clearly indicated whether the event and corresponding deaths occurred in one of the present-day GBD 2016 locations.

#### *Locations with 4- or 5-star data quality ratings*

For countries and territories assigned 4- or 5-star data quality ratings (see Section 2 of the appendix for details), we prioritized data from country-specific vital registration. VR data for fatal discontinuities was exclusively used in 4- and 5-star locations unless there was well-known data quality issues or discrepancies in the cause of death data reporting related to a particular event (e.g., supplemental death data for Louisiana was used for Hurricane Katrina because of established data reporting issues). The process for identification of location-year fatal discontinuities is described more in the Modelling strategy below.

#### *Locations with less than 4-star data quality ratings*

For countries and territories assigned data quality ratings below 4 stars, we compared VR with data available from alternative sources for Exposure to forces of nature, taking the highest death estimate available from all sources. For other fatal discontinuity causes, we disregarded lower quality VR and used well-established databases by type of fatal discontinuity. Whenever specific events were identified that did not have corresponding data points within these databases, we used supplemental data sources, including scientific literature.

Major data sources other than country vital registration for each fatal discontinuity cause follow.

***Conflict and terrorism.*** Data for conflict and terrorism come from the Uppsala Conflict Data Program (UCDP), International Institute for Strategic Studies, and Robert S. Strauss Center for International Security and Law. The table below provides details about the various datasets we utilized from these sources, the dates they were last accessed, and the years for which we used the data provided.

| Data source name                                                   | Date accessed | Years of data downloaded | Type of data included                                                                                                                                                                                                                               |
|--------------------------------------------------------------------|---------------|--------------------------|-----------------------------------------------------------------------------------------------------------------------------------------------------------------------------------------------------------------------------------------------------|
| <b>Uppsala Conflict Data Program<sup>1</sup></b>                   |               |                          |                                                                                                                                                                                                                                                     |
| Battles                                                            | 10/6/16       | 1989-2015                | Armed conflict: incompatibility that concerns government and/or territory over which the use of armed force between the military forces of two parties, of which at least one is the government of a state, which resulted in deaths                |
| Non-state                                                          | 10/6/16       | 1989-2015                | The use of armed force between two organized armed groups, neither of which is the government of a state, which results in deaths                                                                                                                   |
| One-sided                                                          | 10/6/16       | 1989-2015                | The use of armed force by the government of a state or by a formally organized group against civilians which results in deaths                                                                                                                      |
| Georeferenced Event Dataset                                        | 10/6/16       | 1989-2015                | UCDP battles, non-state, and one-sided conflict deaths with the most disaggregated location information available                                                                                                                                   |
| PRIO Battles Deaths Dataset                                        | 10/6/16       | 1970-1988                | Armed conflict (civil wars, etc.)                                                                                                                                                                                                                   |
| <b>International Institute for Strategic Studies</b>               |               |                          |                                                                                                                                                                                                                                                     |
| Armed Conflict Dataset                                             | 10/6/16       | 1997-Present             | Insurgency, Inter-state, Intra-state conflict deaths                                                                                                                                                                                                |
| <b>Robert S. Strauss Center For International Security And Law</b> |               |                          |                                                                                                                                                                                                                                                     |
| Armed Conflict Location and Event Dataset (ACLED)                  | 10/6/16       | 1997-2016                | Actions of opposition groups, governments, and militias in selected locations in Africa and Asia, specifying the exact location and date of battle events, transfers of military control, headquarter establishment, civilian violence, and rioting |
| Social Conflict Analysis Database (SCAD)                           | 10/6/16       | 1990-2016                | Protests, riots, strikes, inter-communal conflict, government violence against civilians, and other forms of social conflict (covers Africa and Latin America)                                                                                      |

Supplemental online research was conducted for recent conflicts where the databases above were not up-to-date. In addition, deaths due to conflict and terrorism in Iraq from 2003 to present were estimated using a combination of supplemental sources. The source found with the lowest number of deaths, Iraq Body Count<sup>2</sup>, was used as the lower bound of the uncertainty interval from 2003 to 2016. Estimates from the Iraq Mortality Study by Hagopian et al<sup>3</sup> from 2003 to 2006, the deadliest years of the war, were used to scale deaths to generate the upper uncertainty interval limits using the following formula:

$$deaths_{GBD\ 2016,\ high} = deaths_{IBC} \cdot \left[ \frac{deaths_{IMS}}{deaths_{IBC}} \right]_{2003-2006}$$

We used the average ratio between IMS and IBC reported deaths between 2003 and 2006, multiplied by the number of deaths reported by the IBC. This high estimate is carried forward through 2016 under the assumption that the Iraq Body Count similarly undercounts the number of deaths due to the ongoing civil war in Iraq. The final, best estimate for conflict and terrorism deaths in Iraq from 2003 to 2016 is the midpoint of the high and low estimates given above.

We identified four major conflicts that were not represented in these databases: 1997 civil conflict in Albania<sup>4</sup>; 1971 genocide in Bangladesh<sup>5</sup>; 1972 genocide in Burundi<sup>6</sup>; and 1993 genocide in Burundi<sup>6</sup>. In these cases, we used literature sources in order to account for these fatal discontinuities.

For country-years where multiple sources provided estimates, we prioritized sources in the following order: (1) country VR data, if death estimates were highest of all sources; (2) UCDP; (3) IISS; (4) country VR if death estimates were not the highest of all sources; (5) Robert Strauss Center; (6) online supplemental research.

***Exposure to forces of nature, other injury causes, and protein-energy malnutrition.*** The Centre for Research on the Epidemiology of Disasters' International Disaster Database (EM-DAT) served as the primary non-VR source of fatal discontinuities due to exposure to forces of nature (i.e., natural disasters); other transport injuries (e.g., plane, train, and boat accidents); poisonings; fire, heat, and hot substances; other exposure to mechanical forces (eg, building collapse); and protein-energy malnutrition (ie, famine or severe drought). Data from EM-DAT were last accessed March 29, 2017. Supplemental online research was conducted for events where EM-DAT was not up-to-date.

For country-years where multiple sources provided estimates, we prioritized sources in the following order: (1) country VR data, if data quality rating is 4 or 5 stars; (2) country VR data if data quality rating is less than 4 stars and death estimates were highest of all sources; (3) EM-DAT; (4) online supplemental research. Exceptions were made where it was clear that VR systems had been compromised by the event being measured.

***Meningococcal meningitis and diarrheal diseases.*** New to GBD 2016, we sought to include fatal discontinuities due to a subset of infectious diseases: meningococcal meningitis (or meningococcal infection) and diarrheal disease caused by cholera. These two infectious diseases were included on the fatal discontinuity cause list for GBD 2016 because (1) their current modelling strategies with the Cause of Death Ensemble model (CODEm) does not optimally capture the potentially highly variable – or epidemic – mortality levels and trends characteristic of these two causes; and (2) they can contribute to significant total fatalities in a given location-year. Other infectious diseases for which the latter is true – high death rates in the presence of an outbreak or epidemic – are currently modelled with alternative cause of death methods (eg, natural history models for measles and yellow fever), which allow for greater variation year-over-year if or when outbreaks occur. In future iterations of the GBD, we plan to revisit the inclusion criteria for infectious diseases as fatal discontinuities and develop more of an ensemble approach to modelling causes that can be both endemic (and thus result in more uniform levels and trends over time) and epidemic (and subsequently lead to rapid increases – and decreases – in deaths for a given location-year).

The Global Infectious Diseases and Epidemiology Network (GIDEON) served as the primary data source for collating cholera and meningococcal meningitis or meningococcal infection death reports.<sup>7,8</sup> For any year in which cholera or meningococcal meningitis deaths were recorded in a country or territory covered by the GBD, we directly extracted reported deaths from 1970 to 2016. When there were reporting gaps in cholera or meningococcal meningitis deaths over this period of time and the World Health Organization (WHO) annual cholera or meningitis reports had death reports for those years, we used the WHO reports. The primary exception were two major cholera outbreaks in Bangladesh – 1982-1983 and 1991 – which were not captured by either GIDEON or WHO. As result, we used the EM-DAT records for the 1982-1983 outbreak and literature for the 1991 outbreak.<sup>9</sup>

**Ebola.** Since GBD 2015, outbreaks due to Ebola virus disease have been estimated using the data and methods described in the Ebola write-up of this appendix and included in GBD death estimates in the same way as other fatal discontinuity causes.

### **Modelling strategy**

All input data for fatal discontinuity causes were run through the causes of death data formatting and mapping process.

#### *VR de-duplication*

For country-years where deaths due to fatal discontinuity causes were recorded in both VR and other utilized data sources, the higher of the two estimates were taken in the case of deaths due to conflict and terrorism and exposure to forces of nature.

For the other injury causes that also have a CODEm model, a process was established to avoid duplication of fatal discontinuity deaths in the two models. First, location-years with death data from non-VR sources were identified. If these location-cause-years also had VR death estimates that were greater than 40% higher than the immediately surrounding years and could be linked to a specific fatal discontinuity event, these years were marked as outliers in the VR data and the difference between the outlier year and the average of the surrounding years was included in the relevant cause in the fatal discontinuities database. The deaths from the identified events were subtracted from the all-cause VR estimates used in the all-cause mortality estimation process.

#### *Uncertainty analysis for input and draw-level input to age-sex splitting*

Uncertainty intervals for deaths due to conflict and terrorism were generated using UCDP high and low death estimates, except in the case of Iraq 2003-2016, as explained above. In cases where low and high estimates were not included in the available data, the regional average uncertainty interval was applied to the available death estimate across all fatal discontinuity causes.

We assumed a normal distribution using the mean deaths and standard deviation based on high and low estimates. The standard deviation was capped at the mean divided by 1.96 in order to ensure that 95% of the 3,000 draws generated were greater than zero. Non-positive draws were dropped, and 1,000 draws were sampled from the remaining set of positive draws. These 1,000 positive draws were used for final calculations of means and uncertainty intervals.

#### *Age-sex splitting*

All compiled data were run through the causes of death age-sex splitting process.

#### *Changes from GBD 2015*

GBD 2016 saw an effort to systematize the collection of up-to-date fatal discontinuity data through supplemental online research. New tools included expanded use of web scraping and online media tracking. This process resulted in a more comprehensive set of conflict and terrorism data for 2016, as well as large natural disasters not contained in EM-DAT or VR.

In previous rounds of GBD, deaths due to executions and police conflict were included with conflict and terrorism. In GBD 2016, these causes were separated and estimated separately from the overarching war and conflict cause group using a CODEm model, as described in this appendix.

We added two epidemic infectious diseases, cholera and meningococcal meningitis, to the list of fatal discontinuities in an effort to better capture the large variations in mortality that these causes can incur.

We removed the absolute death threshold for fatal discontinuities and limited our inclusion criteria to an event exceeding a mortality rate threshold per location-year. We view this revision as an improvement for estimating the effects of fatal discontinuities in subnational locations and countries with smaller populations, as an absolute threshold of 10, 20, or 50 deaths would ultimately omit events in these places.

## References

- 1 UCDP/PRIO Armed Conflict Dataset Codebook. Uppsala Conflict Data Program (UCDP); Centre for the Study of Civil Wars, International Peace Research Institute, Oslo (PRIO), 2013.
- 2 Iraq Body Count. <https://www.iraqbodycount.org/database/> (accessed May 8, 2017).
- 3 Hagopian A, Flaxman AD, Takaro TK, *et al.* Mortality in Iraq Associated with the 2003–2011 War and Occupation: Findings from a National Cluster Sample Survey by the University Collaborative Iraq Mortality Study. *PLOS Medicine* 2013; **10**: e1001533.
- 4 Jarvis C. The Rise and Fall of Albania’s Pyramid Schemes. *F&D* 2000; **37**.  
<http://www.imf.org/external/pubs/ft/fandd/2000/03/jarvis.htm>.
- 5 Obermeyer Z, Murray CJL, Gakidou E. Fifty years of violent war deaths from Vietnam to Bosnia: analysis of data from the world health survey programme. *BMJ* 2008; **336**: 1482–6.
- 6 Milton L. Rwanda, 1994: International incompetence produces genocide. 1994  
<https://ezproxy.uwc.edu/login?url=http://search.proquest.com/docview/234405747?accountid=42411>.
- 7 Inc GI, Berger DS. Cholera: Global Status: 2017 edition. GIDEON Informatics Inc, 2017.
- 8 Inc GI, Berger DS. Bacterial Meningitis: Global Status: 2017 edition. GIDEON Informatics Inc, 2017.
- 9 Siddique A, Zaman K, Baqui A, *et al.* Cholera Epidemics in Bangladesh: 1985-1991. *Journal of Diarrhoeal Diseases Research* 1992; **10**: 79–86.

## Section 4: Central computation

### 4.1. Correction for miscoding of Alzheimer’s and other dementias and Parkinson’s disease

#### 4.1.1 Objective

We estimated Alzheimer’s disease and other dementias, Parkinson’s disease, and atrial fibrillation and flutter on the basis of longitudinal prevalence and excess-mortality data in order to help account for changing patterns in death certification and corresponding implausible time trends in many vital registration sources. This method was first implemented for Alzheimer’s disease and other dementias in GBD 2013. We added atrial fibrillation and flutter and Parkinson’s disease to the causes modelled using this strategy in GBD 2015 and GBD 2016, respectively. All of these causes were processed in CoDCorrect in a manner that was agnostic to the likely targets of misclassification, which inappropriately led to changes in mortality estimates for causes unrelated to these three in GBD 2015. For GBD 2016, we have improved this process by completing a literature review to identify the causes of death most closely associated with Parkinson’s and Alzheimer’s diseases<sup>20–23</sup> and limiting the CoDCorrect adjustments to only include those causes. We summed CODEm results for Parkinson’s, Alzheimer’s, lower respiratory infections, protein-energy malnutrition, other nutritional deficiencies, cerebrovascular disease, interstitial nephritis and urinary tract infections, decubitus ulcer, and pulmonary aspiration and foreign body in airway to generate a total envelope for all these conditions. This envelope is used as a parent cause for all calculations outlined below. Atrial fibrillation and flutter did not require a similar process as its scaling in CoDCorrect is already restricted to be within the cardiovascular disease section of the GBD cause list.

#### 4.1.2 Algorithm and levels

The core algorithm closely resembles the CodCorrect algorithm, and can be written as follows:

$$oCD_{lyasjd} = CustomD_{lyasjd} \left( \frac{CODEmD_{lyasjd}}{\sum_{j=1}^{j=k} CustomD_{lyasjd}} \right)$$

Where  $oCD_{lyasjd}$  is the corrected number of deaths for a location  $l$ , year  $y$ , age  $a$ , sex  $s$ , cause  $j$ , and draw  $d$ .  $CodemD_{lyasjd}$  is the parent cause deaths for a location  $l$ , year  $y$ , age  $a$ , sex  $s$ , cause  $j$ , and draw  $d$ , using data from CODEm for all causes. For every cause in this correction we use the same parent cause which is equal to the sum of the individual causes using data from CODEm.  $CustomD_{lyasjd}$  is the uncorrected number of deaths estimated from a cause-specific model for a location  $l$ , year  $y$ , age  $a$ , sex  $s$ , cause  $j$ , and draw  $d$ , using data from DisMod-MR 2.1 for Alzheimer’s and Parkinson’s and data from CODEm for all other causes.

This correction process only works on one level. It rescales the custom cause-specific deaths to match the correction envelope (which is used for  $CodemD_{lyasjd}$  in the above equation). The custom cause-specific deaths (which are used for  $CustomD_{lyasjd}$  in the above equation) are either DisMod-MR 2.1 results (for Alzheimer’s and Parkinson’s) or CODEm results (for all other causes). Because there is only one level, this process occurs only once for each cause.

## 4.2 Imported cases

Imported cases are fatalities that occur in a geographic area where a particular cause of death is known to be eradicated in a specific time period or where infection cannot occur. We apply space-time restrictions to these causes in the modeling strategy for that location and time period. However, in some rare cases, there are deaths from these causes outside of restricted locations and time periods. These deaths are referred to as Imported Cases.

Illustrating this concept, Chagas Disease is transmitted by insect vectors that only exist in the Americas. For this reason, Chagas Disease is restricted in the models for countries such as Russia. However, it is possible that someone traveling in Latin America could contract Chagas Disease and then die after returning home to Russia. Imported cases accounts for these kinds of deaths.

To calculate these Imported cases, we find all cases from the Vital Registrations of data-rich countries for any cause of death that is otherwise geographically or temporally restricted. We then create a beta distribution from that data point, using the sample size of the Vital Registration for that data point, and upload these draws as a custom Cause of Death model. This model is then used as an input to CoDCorrect.

## 4.3 CodCorrect

### 4.3.1 Objective of CodCorrect

As mentioned in the main text, the Causes of Death models are cause-specific. As such, there is no guarantee that the sum of these models will equal the results of the all-cause mortality estimates or that model results of child causes add up to the parent model results. The CoDCorrect process is used to make the Causes of Death and all-cause mortality estimates internally consistent using a very simple algorithm.

### 4.3.2 Algorithm and levels

The core algorithm remains the same as it did in GBD 2013. The equation can be written as follows:

$$CD_{lyasjd} = D_{lyasjd} \left( \frac{PD_{lyasjd}}{\sum_{j=1}^{j=k} D_{lyasjd}} \right)$$

Where  $CD_{lyasjd}$  is the corrected number of deaths for a location  $l$ , year  $y$ , age  $a$ , sex  $s$ , cause  $j$ , and draw  $d$ .  $PD_{lyasjd}$  is the parent cause deaths for a location  $l$ , year  $y$ , age  $a$ , sex  $s$ , cause  $j$ , and draw  $d$ .  $D_{lyasjd}$  is the uncorrected number of deaths estimated from a cause-specific model for a location  $l$ , year  $y$ , age  $a$ , sex  $s$ , cause  $j$ , and draw  $d$ .

The CoDCorrect process starts by rescaling the Level 1 causes to match the all-cause mortality estimates (which is used for  $PD_{lyasjd}$  in the above equation). Level 2 causes are then rescaled to their corrected parent causes. This continues until all levels of the hierarchy have been rescaled. Causes and their levels within the CoDCorrect hierarchy can be found in Appendix Table 10.

Unlike in GBD 2013, HIV is not included in the CoDCorrect process for GBD 2016. To account for this change, Level 1 CoDCorrect causes are rescaled to HIV-deleted mortality estimates which are produced as part of the mortality and HIV estimation process. Results from the GBD version of Spectrum are



added to the post-CoDCorrect death estimates, along with fatal discontinuities and imported cases, to generate the full set of death estimates.

#### 4.3.3 Diagnostic results of CodCorrect by cause and location

For more detail on diagnostic results of CodCorrect by cause see Appendix Table 11.

#### 4.4 Years of life lost (YLLs) calculation

Years of life lost due to premature mortality (YLLs) were computed for 693 locations and 36 years. First, we used the lowest observed age-specific mortality rates by location and sex across all estimation years from locations with total populations greater than 5 million in 2016 to establish a theoretical minimum risk reference life table. The values can be found in Appendix Table 18.

The YLL is a metric that is computed by multiplying the number of estimated deaths by the standard life expectancy at age of death. The metric therefore highlights premature deaths by applying a larger weight to deaths that occur at younger age groups. We propagated uncertainty from CoDCorrected deaths for all demographics. The core equation can be written as follows:

$$YLL = \sum_{c=1, a=0, s=1}^{\infty} d_{cas} e_a$$

##### 4.4.1 GBD world population age standard

Age-standardised rates in GBD are estimated using the GBD world population age standard, which is calculated using methods detailed in Ahmad et al 2001.<sup>24</sup> Briefly, we used the age-specific proportional distributions of all national locations from the World Population Prospects 2012 revision<sup>25</sup> for all years from 2010 to 2035 and generated a standard population structure by taking the non-weighted mean across all the aforementioned country-years. For consistency and comparability across recent iterations of GBD, we used the same standard population structure as used in GBD 2013 and GBD 2015. For values used for the age standard see Appendix Table 19.

## 4.5 Socio-demographic Index (SDI) analysis

### 4.5.1 Development of revised SDI indicator

The Socio-demographic Index (SDI) is a composite indicator of development status constructed for GBD 2015 whose components are strongly correlated with health outcomes. It is the geometric mean of 0 to 1 indices of total fertility rate, mean education for those aged 15 and older, and lag distributed income per capita.

SDI was calculated using the Human Development Index (HDI) methodology, wherein an index value was determined for each of the covariate inputs (log LDI, mean educational attainment over age 15, and TFR). For GBD 2015 these indices were computed on the basis of a relative scale, in which the upper and lower bounds were established by the maximum and minimum observed values, respectively, for each input over the entire estimation period of 1980–2015.

Prompted by the observations that the scales (and by extension SDI) were sensitive to the addition of new subnational locations as GBD becomes more granular and to the length of the time period over which SDI is computed, for GBD 2016 we implemented fixed scales in determining individual indices. Thus, an index score of 0 now represents the minimum level of each covariate input past which selected health outcomes can get no worse. An index score of 1 represents the maximum level of each covariate input past which selected health outcomes cease to improve. As a composite, a location with an SDI of 0 would have a theoretical minimum level of development relevant to these health outcomes, while a location with an SDI of 1 would have a theoretical maximum level of development relevant to these health outcomes.

We selected the minima and maxima of the scales by examining the relationships each of the inputs had with life expectancy at birth and under-5 mortality and identifying points of limiting returns at both high and low values, if they occurred prior to theoretical limits (eg, a TFR of 0). The final scales are summarised in the table below.

| <b>Input</b>                                      | <b>Lower bound</b>                  | <b>Upper bound</b>         |
|---------------------------------------------------|-------------------------------------|----------------------------|
| TFR                                               | 1.5 <sup>a</sup>                    | 8                          |
| LDI per capita                                    | 250 USD (5.52 log USD) <sup>b</sup> | 60,000 USD (11.00 log USD) |
| Mean educational attainment for ages 15 and older | 0 years                             | 17 years                   |

<sup>a</sup> The low point of limiting returns for TFR was identified at 1 during GBD 2015; however, incorporating feedback with regard to accounting for a pattern of TFR rebound in highly developed countries, we instead set the lower limit of TFR at 1.5.

<sup>b</sup> The minimum for the LDI scale was originally set at the theoretical limit of 0 USD, as we did not observe an asymptotic relationship between  $\log(\text{LDI})$  and  $E_0$  or  $5q_0$  at lower values of  $\log(\text{LDI})$ . Empirically, however, we also did not observe an LDI below 350 USD (5.86 log USD) for the estimation period 1970–2016. In log-space, this meant that approximately half of our scale was not being utilised, compressing the observed variation in LDI and diminishing its meaningful contribution to SDI. Accordingly, we set the lower limit on LDI to 250 USD (5.52 log USD) to ensure we were fully utilising the range of the scale to capture its variation across space and time, as is the case with the other two inputs.

Using the limits on the scales described above, we computed the index scores underlying SDI analogously to GBD 2015 as follows:

$$I_{cly} = \frac{(C_{ly} - C_{low})}{(C_{high} - C_{low})}$$

Where  $I_{cly}$  – the index for covariate  $C$ , location  $l$ , and year  $y$  – is equal to the difference between the value of that covariate in that location-year and the lower bound of the covariate divided by the difference between the upper and lower bounds for that covariate. If the values of input covariates fell outside the upper or lower bounds (eg, LDI per capita greater than 60,000 USD), they were mapped to the respective upper or lower bounds. We also note that the index value for TFR was computed as  $1 - I_{TFRly}$ , as lower TFRs correspond to higher levels of development, and thus higher index scores. For GBD 2016 we expanded the computation of SDI to 755 national and subnational locations spanning the time period 1970–2016.

The composite Socio-demographic Index is the geometric mean of these three indices for a given location-year. The cutoff values used to determine quintiles for analysis were then computed using country-level estimates of SDI for the year 2016, excluding countries with populations less than 1 million.

#### Example calculation

Below we present the calculation of SDI for Mexico in the year 2010:

$$TFR = 2.43; \text{ Mean educ yrs pc} = 9.23; \ln LDI = 9.58$$

$$I_{TFR} = 1 - \frac{2.43 - 1.5}{8 - 1.5} = .855$$

$$I_{Educ} = \frac{9.23 - 0}{17 - 0} = .543$$

$$I_{\ln LDI} = \frac{9.58 - 5.52}{11.00 - 5.52} = .741$$

$$SDI = \sqrt[3]{I_{TFR} * I_{Educ} * I_{\ln LDI}} = \sqrt[3]{.855 * .543 * .741} = .701$$

#### 4.5.2 Age-sex-specific relationships between SDI and cause-specific mortality rates

In order to evaluate the relationship between SDI and mortality, we fit a Gaussian process regression using a linear prior to the mean function within a stochastic partial differential equation (SPDE) framework.

We first assume the following:

$$\ln(Y_{iasc}) \sim N(\mu_i, \sigma^2)$$

Where  $Y_{i,asc}$  is the cause-specific mortality rate for a given level of SDI ( $i$ ), age group ( $a$ ), sex ( $s$ ), and cause ( $c$ ).

We then specify a linear prior to the mean  $\mu_i$ :

$$\mu_i = \alpha + \beta(SDI) + z_i$$

Where

$$z_i \sim GP(0, \Sigma_M)$$

$GP$  refers to a Gaussian process, and  $\Sigma_M$  refers to the Matern covariance function.

For causes where the relationship between SDI and mortality rates was markedly non-linear (eg, many neglected tropical diseases), we instead specified a continuous piecewise linear prior to the mean. The locations of these knots, as well as the slope and intercept parameters for each of the segments, were dynamically chosen such that they minimised the sum of squared residuals when fit to the data.

Using SPDE, we specified additional priors on the range, variance, and precision of the mean function, as well as selected the number of underlying bases. These hyperparameters were chosen empirically and were identical for all age-sex-cause combinations. Values for the selected hyperparameters are displayed in the table below.

| Hyperparameter  | Value                       |
|-----------------|-----------------------------|
| Range           | 0.2                         |
| Variance        | 1                           |
| Precision       | $1 \times 10^{10}$          |
| Number of bases | 2 (mesh points at 0.3, 0.7) |

Regressions were run separately by age-sex-cause, using observed cause-specific mortality rates from all years 1970–2016 to produce 10,000 simulations per level of SDI from 0 to 1 in increments of 0.005. We fit models on observations from all countries estimated in GBD and included state and province level estimates in lieu of national estimates for Brazil, China, and India due to their large populations (> 200 million) and small number of state-level units modelled in GBD (BRA – 27, IND – 31, CHN – 33) relative to population. Though the United States and Indonesia also fall under the designation of large-population (> 200 million), we fit models on national-level observations instead of state/province-level observations for these two countries as a result of the undue influence from the relatively large number of state-level units modelled in GBD relative to population (USA – 51, IDN – 34). Country and region dummy variables used in GBD 2015 were no longer included in this analysis. All models were fit using the INLA package in R.

In order to produce age-aggregates of our results, we used the same modelling framework as above. In this case, however, we regarded the logit of the share of population in each age group as the dependent variable to estimate a smoothed relationship between population age-structure and SDI. Predictions for each age group at each level of SDI were rescaled to sum to 100%.

### References

- 1 Lozano R, Freeman MK, James SL, *et al.* Performance of InterVA for assigning causes of death to verbal autopsies: multisite validation study using clinical diagnostic gold standards. *Popul Health Metr* 2011; **9**: 50.
- 2 Office of the Registrar General and Census Commissioner. India Special Survey of Deaths. India, 2004.
- 3 GBD 2016 Mortality Collaborators. Global, regional, and national under-5 mortality, adult mortality, age-specific mortality, and life expectancy, 1970-2016: a systematic analysis for the Global Burden of Disease Study 2016. *Lancet Rev* 2017.
- 4 Office of the Registrar General and Census Commissioner. India Medical Certification of Cause of Death Reports 1990-2010. India, 2014.
- 5 Office of the Registrar General and Census Commissioner. India Medical Certification of Cause of Death Reports 1980-1986. India.
- 6 Naghavi M, Makela S, Foreman K, O'Brien J, Pourmalek F, Lozano R. Algorithms for enhancing public health utility of national causes-of-death data. *Popul Health Metr* 2010; **8**: 9.
- 7 Ahern RM, Lozano R, Naghavi M, Foreman K, Gakidou E, Murray CJ. Improving the public health utility of global cardiovascular mortality data: the rise of ischemic heart disease. *Popul Health Metr* 2011; **9**: 8.
- 8 Barker B, Degenhardt L, National Drug and Alcohol Research Centre (Australia). Accidental drug-induced deaths in Australia 1997-2001. Sydney, Australia: National Drug and Alcohol Research Centre, University of New South Wales, 2003.
- 9 Roxburgh A, Burns L. Accidental drug-induced deaths due to opioids in Australia, 2011. Sydney, Australia: National Drug and Alcohol Research Centre, University of New South Wales, 2015.
- 10 Roxburgh A, Burns L. Cocaine and methamphetamine related drug-induced deaths in Australia, 2011. Sydney, Australia: National Drug and Alcohol Research Centre, University of New South Wales, 2015.
- 11 Naghavi M, Wang H, Lozano R, *et al.* Global, regional, and national age-sex specific all-cause and cause-specific mortality for 240 causes of death, 1990–2013: a systematic analysis for the Global Burden of Disease Study 2013. *The Lancet* 2015; **385**: 117–71.
- 12 Lozano R, Naghavi M, Foreman K, *et al.* Global and regional mortality from 235 causes of death for 20 age groups in 1990 and 2010: a systematic analysis for the Global Burden of Disease Study 2010. *The Lancet* 2012; **380**: 2095–128.
- 13 Calvert C, Ronsmans C. The contribution of HIV to pregnancy-related mortality: a systematic review and meta-analysis. *AIDS Lond Engl* 2013; **27**: 1631–9.
- 14 DerSimonian R, Laird N. Meta-analysis in clinical trials. *Control Clin Trials* 1986; **7**: 177–88.

- 15 Lozano R, Lopez AD, Atkinson C, Naghavi M, Flaxman AD, Murray CJ. Performance of physician-certified verbal autopsies: multisite validation study using clinical diagnostic gold standards. *Popul Health Metr* 2011; **9**: 32.
- 16 Foreman KJ, Lozano R, Lopez AD, Murray CJ. Modeling causes of death: an integrated approach using CODEm. *Popul Health Metr* 2012; **10**: 1.
- 17 Bell RM, Koren Y. Lessons from the Netflix Prize Challenge. *SIGKDD Explor Newsl* 2007; **9**: 75–79.
- 18 Bell RM, Koren Y, Volinsky C. All together now: A perspective on the NETFLIX PRIZE. *CHANCE* 2010; **23**: 24–24.
- 19 Flaxman AD, Vos T, Murray CJL, editors. *An Integrative MetaRegression Framework for Descriptive Epidemiology*, 1 edition. Seattle: University of Washington Press, 2015.
- 20 Todd S, Barr S, Passmore AP. Cause of death in Alzheimer’s disease: a cohort study. *QJM Mon J Assoc Physicians* 2013; **106**: 747–53.
- 21 Brunnström HR, Englund EM. Cause of death in patients with dementia disorders. *Eur J Neurol* 2009; **16**: 488–92.
- 22 Keene J, Hope T, Fairburn CG, Jacoby R. Death and dementia. *Int J Geriatr Psychiatry* 2001; **16**: 969–74.
- 23 Thomas BM, Starr JM, Whalley LJ. Death certification in treated cases of presenile Alzheimer’s disease and vascular dementia in Scotland. *Age Ageing* 1997; **26**: 401–6.
- 24 Ahmad OB, Boschi-Pinto C, Lopez AD, Murray CJL, Lozano R, Inoue M. Age standardization of rates: A new WHO standard. Geneva, Switzerland: World Health Organization, 2001  
<http://www.who.int/healthinfo/paper31.pdf> (accessed May 20, 2017).
- 25 United Nations Department of Economic and Social Affairs. *World population prospects: the 2012 revision*. New York, NY: United Nations, 2013  
[https://esa.un.org/unpd/wpp/Publications/Files/WPP2012\\_Volume-I\\_Comprehensive-Tables.pdf](https://esa.un.org/unpd/wpp/Publications/Files/WPP2012_Volume-I_Comprehensive-Tables.pdf).

Appendix Figure 1. Analytical flowchart for the development of the GBD 2016 cause of death database

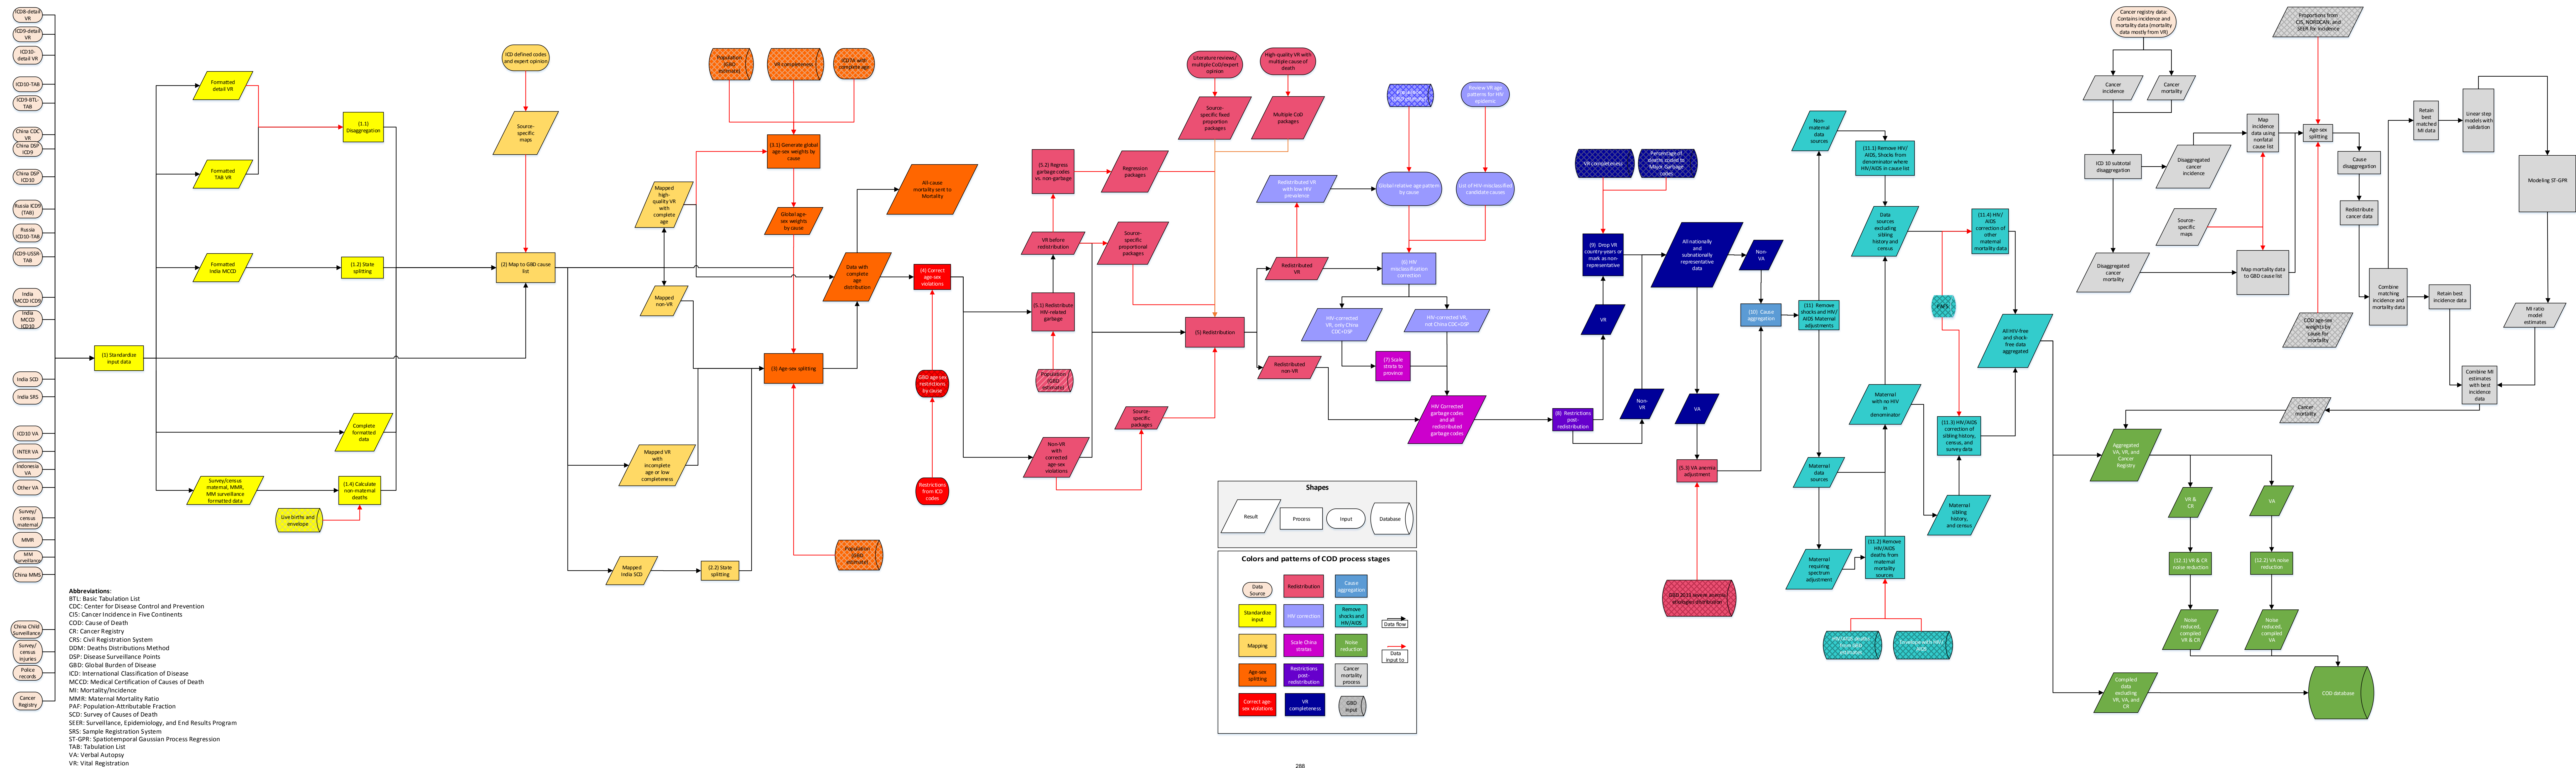



Appendix Figure 2. GBD 2016 Causes of death estimation flowchart by modeling group

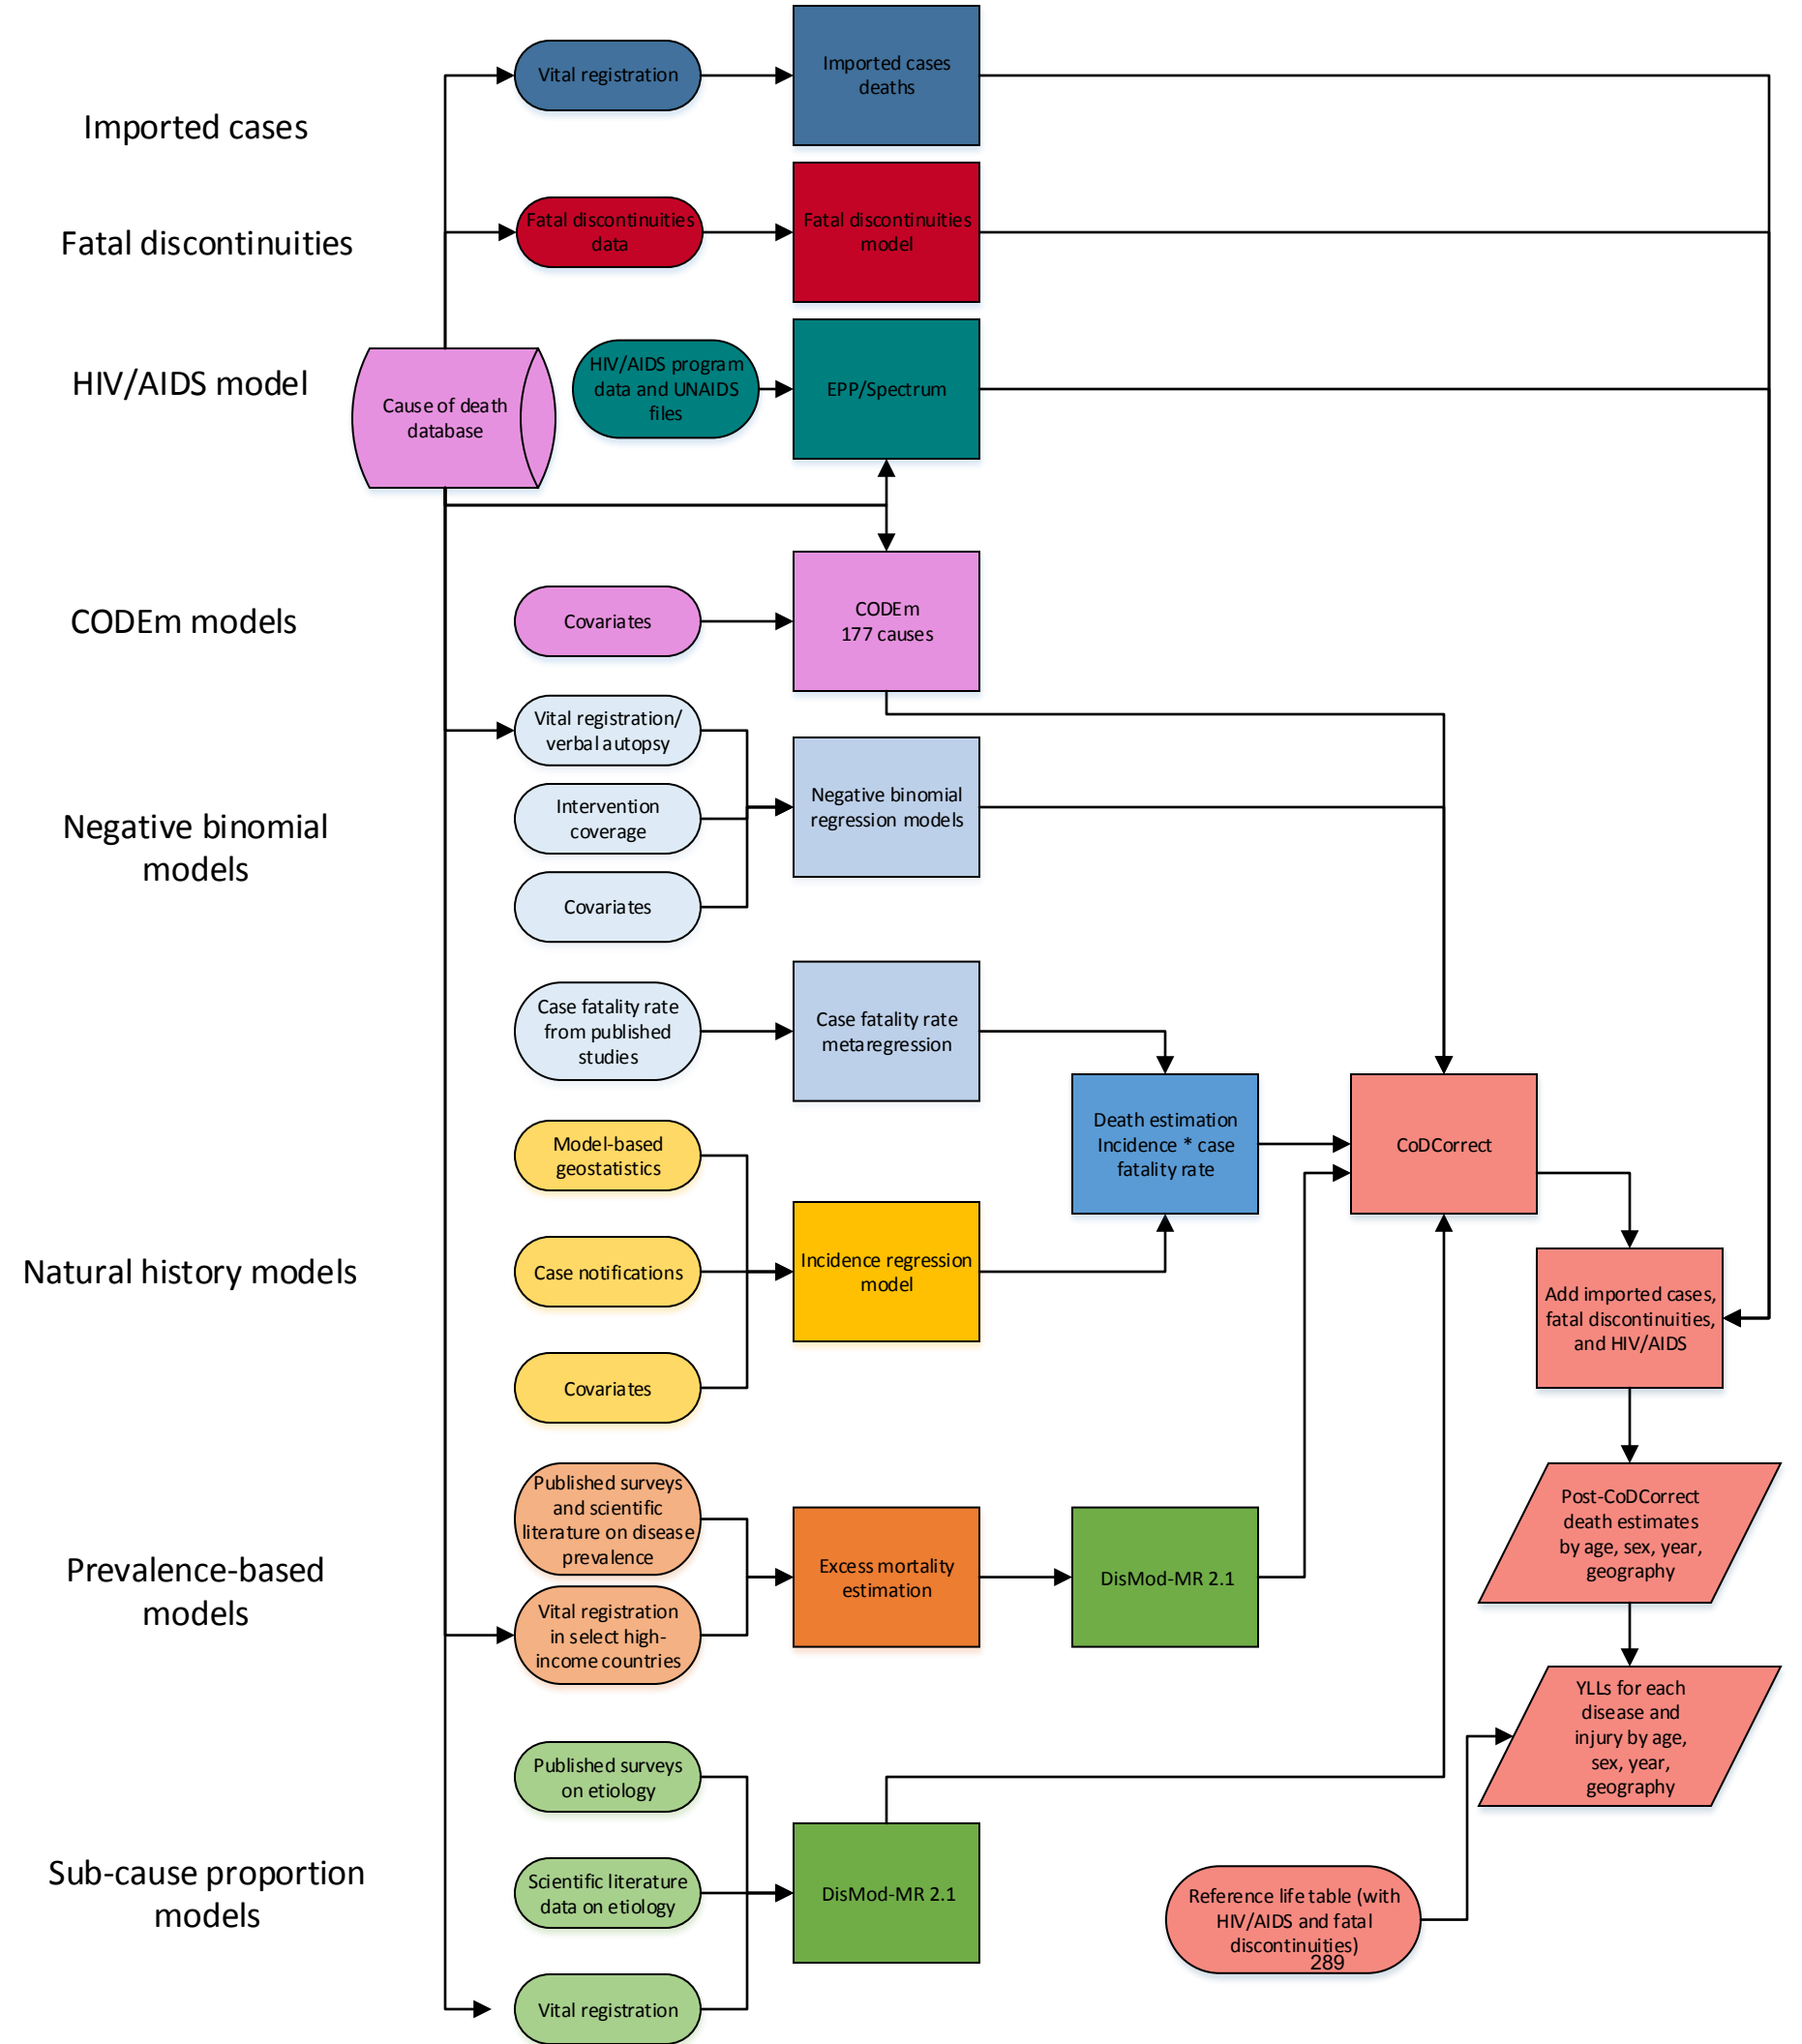

**Abbreviations:**  
 CODEm: Cause of death ensemble model  
 GBD: Global Burden of Disease  
 YLL: years of life lost

Appendix Figure 3 - GBD 2016 DisMod-MR 2.1 analytical cascade

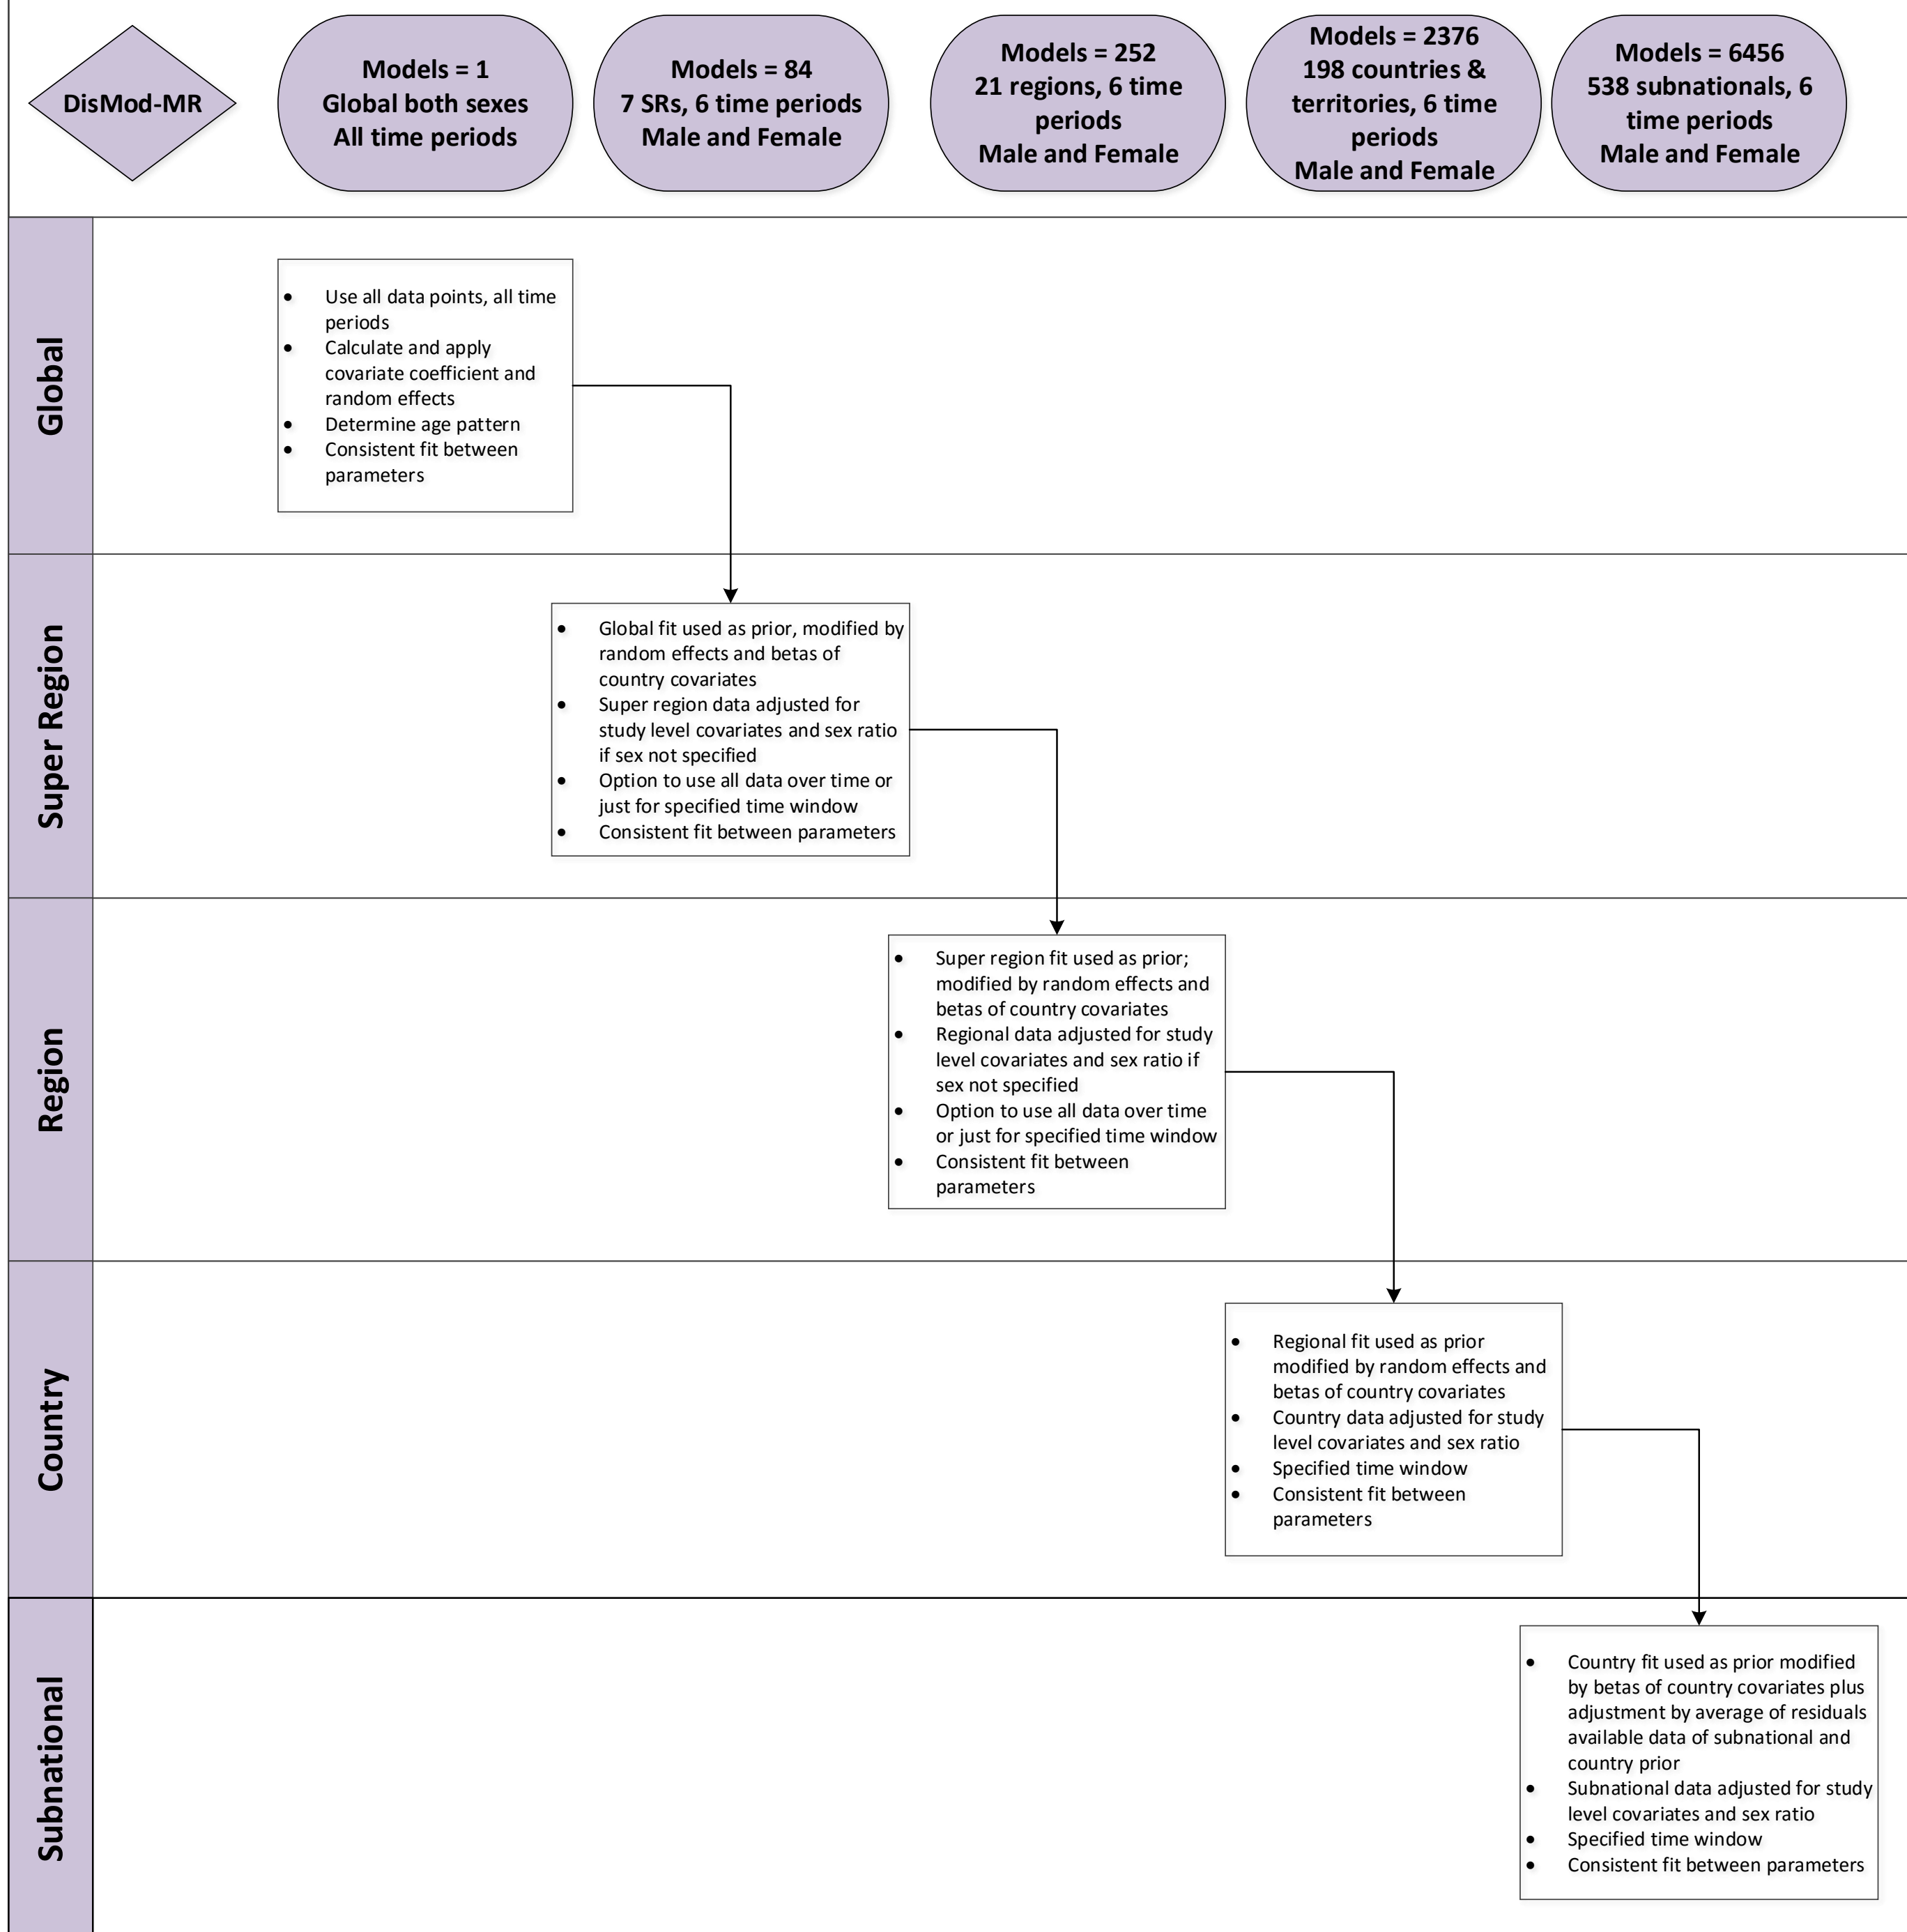

Appendix Figure 4. Vital Registration and Verbal Autopsy data availability by country, 1990–2016

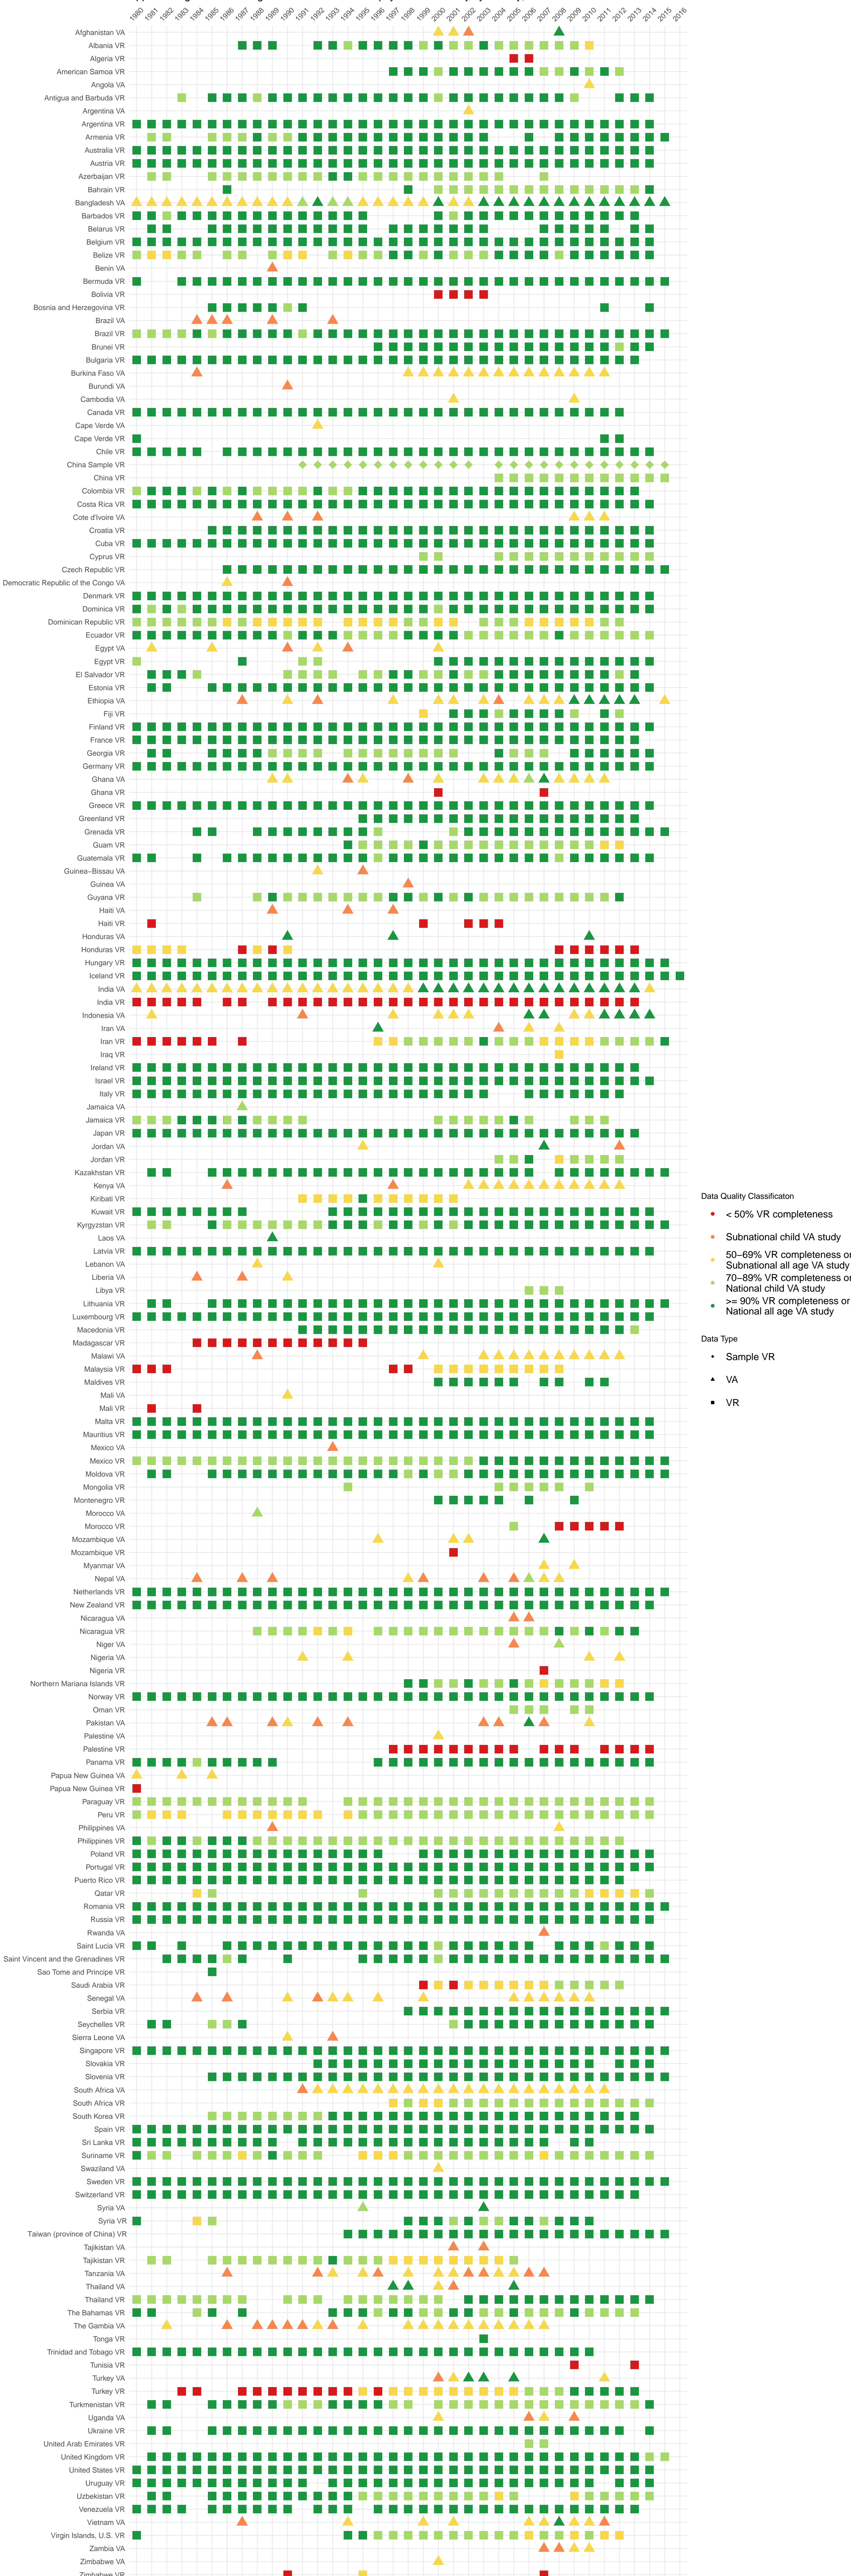

| Appendix Table 1. GATHER checklist of information that should be included in reports of global health estimates, with description of compliance and location of information for GBD 2016. Global, regional, and national age-sex specific mortality for 264 causes of death, 1980–2016: a systematic analysis for the Global Burden of Disease Study 2016 |                                                                                                                                                                                                                                                                                                                                               |                                                                                                                                                        |                                                                                                                                                                   |
|-----------------------------------------------------------------------------------------------------------------------------------------------------------------------------------------------------------------------------------------------------------------------------------------------------------------------------------------------------------|-----------------------------------------------------------------------------------------------------------------------------------------------------------------------------------------------------------------------------------------------------------------------------------------------------------------------------------------------|--------------------------------------------------------------------------------------------------------------------------------------------------------|-------------------------------------------------------------------------------------------------------------------------------------------------------------------|
| #                                                                                                                                                                                                                                                                                                                                                         | GATHER checklist item                                                                                                                                                                                                                                                                                                                         | Description of compliance                                                                                                                              | Reference                                                                                                                                                         |
| <b>Objectives and funding</b>                                                                                                                                                                                                                                                                                                                             |                                                                                                                                                                                                                                                                                                                                               |                                                                                                                                                        |                                                                                                                                                                   |
| 1                                                                                                                                                                                                                                                                                                                                                         | Define the indicators, populations, and time periods for which estimates were made.                                                                                                                                                                                                                                                           | Narrative provided in paper and methods appendix describing indicators, definitions, and populations                                                   | Main text (Methods—Overview, Geographic units and time periods) and methods appendix                                                                              |
| 2                                                                                                                                                                                                                                                                                                                                                         | List the funding sources for the work.                                                                                                                                                                                                                                                                                                        | Funding sources listed in paper                                                                                                                        | Summary (Funding)                                                                                                                                                 |
| <b>Data Inputs</b>                                                                                                                                                                                                                                                                                                                                        |                                                                                                                                                                                                                                                                                                                                               |                                                                                                                                                        |                                                                                                                                                                   |
| <i>For all data inputs from multiple sources that are synthesized as part of the study:</i>                                                                                                                                                                                                                                                               |                                                                                                                                                                                                                                                                                                                                               |                                                                                                                                                        |                                                                                                                                                                   |
| 3                                                                                                                                                                                                                                                                                                                                                         | Describe how the data were identified and how the data were accessed.                                                                                                                                                                                                                                                                         | Narrative description of data seeking methods provided                                                                                                 | Main text (Methods) and methods appendix                                                                                                                          |
| 4                                                                                                                                                                                                                                                                                                                                                         | Specify the inclusion and exclusion criteria. Identify all ad-hoc exclusions.                                                                                                                                                                                                                                                                 | Narrative about inclusion and exclusion criteria by data type provided; Ad-hoc exclusions in cause-specific write ups                                  | Main text (Methods) and methods appendix                                                                                                                          |
| 5                                                                                                                                                                                                                                                                                                                                                         | Provide information on all included data sources and their main characteristics. For each data source used, report reference information or contact name/institution, population represented, data collection method, year(s) of data collection, sex and age range, diagnostic criteria or measurement method, and sample size, as relevant. | An interactive, online data source tool that provides metadata for data sources by component, geography, cause, risk, or impairment has been developed | Online data citation tools: <a href="http://ghdx.healthdata.org/global-burden-disease-study-2016">http://ghdx.healthdata.org/global-burden-disease-study-2016</a> |
| 6                                                                                                                                                                                                                                                                                                                                                         | Identify and describe any categories of input data that have potentially important biases (e.g., based on characteristics listed in item 5).                                                                                                                                                                                                  | Summary of known biases by cause included in methods appendix                                                                                          | Methods appendix                                                                                                                                                  |
| <i>For data inputs that contribute to the analysis but were not synthesized as part of the study:</i>                                                                                                                                                                                                                                                     |                                                                                                                                                                                                                                                                                                                                               |                                                                                                                                                        |                                                                                                                                                                   |
| 7                                                                                                                                                                                                                                                                                                                                                         | Describe and give sources for any other data inputs.                                                                                                                                                                                                                                                                                          | Included in online data source tool                                                                                                                    | <a href="http://ghdx.healthdata.org/global-burden-disease-study-2016">http://ghdx.healthdata.org/global-burden-disease-study-2016</a>                             |
| <i>For all data inputs:</i>                                                                                                                                                                                                                                                                                                                               |                                                                                                                                                                                                                                                                                                                                               |                                                                                                                                                        |                                                                                                                                                                   |
| 8                                                                                                                                                                                                                                                                                                                                                         | Provide all data inputs in a file format from which data can be efficiently extracted (e.g., a spreadsheet as opposed to a PDF), including all relevant meta-data listed in item 5. For any data inputs that cannot be                                                                                                                        | Downloads of input data available through online tools, including data visualization                                                                   | Online data visualization tools, data query tools, and the Global Health Data Exchange                                                                            |

|                               |                                                                                                                                                                                                                                                                         |                                                                                                                                                                                |                                                                                                                                           |
|-------------------------------|-------------------------------------------------------------------------------------------------------------------------------------------------------------------------------------------------------------------------------------------------------------------------|--------------------------------------------------------------------------------------------------------------------------------------------------------------------------------|-------------------------------------------------------------------------------------------------------------------------------------------|
|                               | shared due to ethical or legal reasons, such as third-party ownership, provide a contact name or the name of the institution that retains the right to the data.                                                                                                        | tools and data query tools; input data not available in tools will be made available upon request                                                                              |                                                                                                                                           |
| <b>Data analysis</b>          |                                                                                                                                                                                                                                                                         |                                                                                                                                                                                |                                                                                                                                           |
| 9                             | Provide a conceptual overview of the data analysis method. A diagram may be helpful.                                                                                                                                                                                    | Flow diagrams of the overall methodological processes, as well as cause-specific modelling processes, have been provided                                                       | Main text (Methods) and methods appendix (Appendix Figure 2)                                                                              |
| 10                            | Provide a detailed description of all steps of the analysis, including mathematical formulae. This description should cover, as relevant, data cleaning, data pre-processing, data adjustments and weighting of data sources, and mathematical or statistical model(s). | Flow diagrams and corresponding methodological write-ups for each cause, as well as the demographics and causes of death databases and modelling processes, have been provided | Main text (Methods) and methods appendix (Appendix Figure 2, Appendix Section 3)                                                          |
| 11                            | Describe how candidate models were evaluated and how the final model(s) were selected.                                                                                                                                                                                  | Appendix Section 3                                                                                                                                                             | Methods appendix                                                                                                                          |
| 12                            | Provide the results of an evaluation of model performance, if done, as well as the results of any relevant sensitivity analysis.                                                                                                                                        | Appendix Table 6: CODEm predictive validity results by cause, location type, sex, and age                                                                                      | Methods appendix                                                                                                                          |
| 13                            | Describe methods for calculating uncertainty of the estimates. State which sources of uncertainty were, and were not, accounted for in the uncertainty analysis.                                                                                                        | Appendix Section 3                                                                                                                                                             | Methods appendix                                                                                                                          |
| 14                            | State how analytic or statistical source code used to generate estimates can be accessed.                                                                                                                                                                               | Access statement provided                                                                                                                                                      | Code is provided in an online repository                                                                                                  |
| <b>Results and Discussion</b> |                                                                                                                                                                                                                                                                         |                                                                                                                                                                                |                                                                                                                                           |
| 15                            | Provide published estimates in a file format from which data can be efficiently extracted.                                                                                                                                                                              | GBD 2016 results are available through online data visualization tools, the Global Health Data Exchange, and the online data query tool                                        | Main text, supplementary results, and online data tools (data visualization tools, data query tools, and the Global Health Data Exchange) |
| 16                            | Report a quantitative measure of the uncertainty of the estimates (e.g. uncertainty intervals).                                                                                                                                                                         | Uncertainty intervals are provided with all results                                                                                                                            | Main text, methods appendix, and online data tools (data visualization tools,                                                             |

|    |                                                                                                                                                          |                                                                                                                                           |                                                         |
|----|----------------------------------------------------------------------------------------------------------------------------------------------------------|-------------------------------------------------------------------------------------------------------------------------------------------|---------------------------------------------------------|
|    |                                                                                                                                                          |                                                                                                                                           | data query tools, and the Global Health Data Exchange)  |
| 17 | Interpret results in light of existing evidence. If updating a previous set of estimates, describe the reasons for changes in estimates.                 | Discussion of methodological changes between GBD rounds provided in the narrative of the Article and methods appendix                     | Main text (Methods and Discussion) and methods appendix |
| 18 | Discuss limitations of the estimates. Include a discussion of any modelling assumptions or data limitations that affect interpretation of the estimates. | Discussion of limitations provided in the narrative of the main paper, as well as in the methodological write-ups in the methods appendix | Main text (Limitations) and methods appendix            |

**Appendix Table 2. Total number of site years by cause and source type for 2016**

| Level | Cause                                                              | Vital Registration | Vital Registration-Sample | Verbal Autopsy | Surveillance | Sibling History | Survey/Census | Cancer Registry | Police Records |
|-------|--------------------------------------------------------------------|--------------------|---------------------------|----------------|--------------|-----------------|---------------|-----------------|----------------|
| 0     | All causes                                                         | 15987              | 764                       | 2810           | 2086         | 4472            | 833           | 2990            | 1449           |
| 1     | Communicable, maternal, neonatal, and nutritional diseases         | 15987              | 764                       | 2400           | 2086         | 4472            | 787           |                 |                |
| 2     | HIV/AIDS and tuberculosis                                          | 15947              | 764                       | 1733           | 760          |                 |               |                 |                |
| 3     | Tuberculosis                                                       | 15943              | 764                       | 1710           | 361          |                 |               |                 |                |
| 4     | Drug-susceptible tuberculosis                                      | 13907              | 384                       | 392            |              |                 |               |                 |                |
| 4     | Multidrug-resistant tuberculosis without extensive drug resistance | 7390               | 374                       | 274            |              |                 |               |                 |                |
| 3     | HIV/AIDS                                                           | 15876              | 763                       | 671            | 400          |                 |               |                 |                |
| 4     | Drug-susceptible HIV/AIDS - Tuberculosis                           | 7436               | 367                       |                | 11           |                 |               |                 |                |
| 4     | HIV/AIDS resulting in other diseases                               | 13824              | 384                       |                | 58           |                 |               |                 |                |
| 2     | Diarrhea, lower respiratory, and other common infectious diseases  | 15954              | 764                       | 1905           | 560          |                 |               |                 |                |
| 3     | Diarrheal diseases                                                 | 15942              | 764                       | 1855           | 509          |                 |               |                 |                |
| 4     | Cholera                                                            | 14627              | 383                       |                |              |                 |               |                 |                |
| 4     | Other salmonella infections                                        | 13851              | 384                       |                |              |                 |               |                 |                |
| 4     | Shigellosis                                                        | 14476              | 383                       |                |              |                 |               |                 |                |
| 4     | Enteropathogenic E coli infection                                  | 13767              | 367                       |                |              |                 |               |                 |                |
| 4     | Enterotoxigenic E coli infection                                   | 13767              | 367                       |                |              |                 |               |                 |                |
| 4     | Campylobacter enteritis                                            | 13767              | 367                       |                |              |                 |               |                 |                |
| 4     | Amoebiasis                                                         | 14451              | 375                       |                |              |                 |               |                 |                |
| 4     | Cryptosporidiosis                                                  | 13763              | 365                       |                |              |                 |               |                 |                |
| 4     | Rotaviral enteritis                                                | 13763              | 365                       |                |              |                 |               |                 |                |
| 4     | Aeromonas                                                          | 6383               |                           |                |              |                 |               |                 |                |
| 4     | Clostridium difficile                                              | 13789              | 367                       |                |              |                 |               |                 |                |
| 4     | Norovirus                                                          | 13763              | 365                       |                |              |                 |               |                 |                |
| 4     | Adenovirus                                                         | 13763              | 365                       |                |              |                 |               |                 |                |
| 4     | Other bacterial foodborne diarrhea                                 | 14463              | 377                       |                |              |                 |               |                 |                |
| 4     | Other diarrheal diseases                                           | 13947              | 384                       |                |              |                 |               |                 |                |
| 3     | Intestinal infectious diseases                                     | 15860              | 751                       | 1459           |              |                 |               |                 |                |
| 4     | Typhoid fever                                                      | 15014              | 369                       |                |              |                 |               |                 |                |
| 4     | Paratyphoid fever                                                  | 14325              | 368                       |                |              |                 |               |                 |                |
| 4     | Other intestinal infectious diseases                               | 14435              | 370                       |                |              |                 |               |                 |                |
| 3     | Lower respiratory infections                                       | 15954              | 764                       | 1867           | 560          |                 |               |                 |                |
| 4     | Influenza                                                          | 13948              | 384                       |                |              |                 |               |                 |                |
| 4     | Pneumococcal pneumonia                                             | 13829              | 384                       |                |              |                 |               |                 |                |
| 4     | H influenzae type B pneumonia                                      | 13829              | 384                       |                |              |                 |               |                 |                |
| 4     | Respiratory syncytial virus pneumonia                              | 13806              | 384                       |                |              |                 |               |                 |                |
| 4     | Other lower respiratory infections                                 | 14480              | 384                       |                |              |                 |               |                 |                |
| 3     | Upper respiratory infections                                       | 14620              | 695                       |                |              |                 |               |                 |                |
| 3     | Otitis media                                                       | 15121              | 546                       | 140            |              |                 |               |                 |                |
| 3     | Meningitis                                                         | 15931              | 764                       | 1622           | 546          |                 |               |                 |                |
| 4     | Pneumococcal meningitis                                            | 13810              | 380                       |                |              |                 |               |                 |                |
| 4     | H influenzae type B meningitis                                     | 13809              | 380                       |                |              |                 |               |                 |                |
| 4     | Meningococcal meningitis                                           | 15139              | 384                       |                |              |                 |               |                 |                |
| 4     | Other meningitis                                                   | 13832              | 384                       |                |              |                 |               |                 |                |
| 3     | Encephalitis                                                       | 15670              | 762                       | 574            |              |                 |               |                 |                |
| 3     | Diphtheria                                                         | 14727              | 507                       | 1              |              |                 |               |                 |                |
| 3     | Whooping cough                                                     | 15084              | 588                       | 590            |              |                 |               |                 |                |
| 3     | Tetanus                                                            | 15896              | 643                       | 1441           | 393          |                 |               |                 |                |
| 3     | Measles                                                            | 15478              | 755                       | 1283           | 524          |                 |               |                 |                |
| 3     | Varicella and herpes zoster                                        | 14857              | 763                       | 376            |              |                 |               |                 |                |
| 2     | Neglected tropical diseases and malaria                            | 15933              | 713                       | 1696           | 295          |                 |               |                 |                |
| 3     | Malaria                                                            | 12289              | 506                       | 1595           | 1            |                 |               |                 |                |
| 3     | Chagas disease                                                     | 3676               | 29                        |                |              |                 |               |                 |                |
| 3     | Leishmaniasis                                                      | 15061              | 665                       | 557            |              |                 |               |                 |                |
| 4     | Visceral leishmaniasis                                             | 14958              | 665                       | 557            |              |                 |               |                 |                |
| 3     | African trypanosomiasis                                            | 13778              | 364                       | 173            |              |                 |               |                 |                |
| 3     | Schistosomiasis                                                    | 14585              | 368                       | 41             |              |                 |               |                 |                |
| 3     | Cysticercosis                                                      | 14415              | 549                       |                |              |                 |               |                 |                |
| 3     | Cystic echinococcosis                                              | 14492              | 536                       |                |              |                 |               |                 |                |
| 3     | Dengue                                                             | 15490              | 373                       | 509            | 1            |                 |               |                 |                |
| 3     | Yellow fever                                                       | 14592              | 373                       | 181            |              |                 |               |                 |                |
| 3     | Rabies                                                             | 15581              | 573                       | 1150           | 267          |                 |               |                 |                |
| 3     | Intestinal nematode infections                                     | 15522              | 607                       | 554            |              |                 |               |                 |                |
| 4     | Ascariasis                                                         | 14436              | 365                       |                |              |                 |               |                 |                |
| 3     | Ebola                                                              | 83                 |                           |                | 26           |                 |               |                 |                |
| 3     | Zika virus                                                         | 7378               | 364                       |                |              |                 |               |                 |                |
| 3     | Other neglected tropical diseases                                  | 15518              | 567                       | 44             |              |                 |               |                 |                |
| 2     | Maternal disorders                                                 | 15184              | 733                       | 1758           | 1164         | 4472            | 760           |                 |                |
| 3     | Maternal hemorrhage                                                | 14683              | 714                       | 1247           | 738          | 1               | 7             |                 |                |

**Appendix Table 2. Total number of site years by cause and source type for 2016**

| Level | Cause                                                            | Vital Registration | Vital Registration-Sample | Verbal Autopsy | Surveillance | Sibling History | Survey/Census | Cancer Registry | Police Records |
|-------|------------------------------------------------------------------|--------------------|---------------------------|----------------|--------------|-----------------|---------------|-----------------|----------------|
| 3     | Maternal sepsis and other maternal infections                    | 13457              | 694                       | 945            | 462          | 1               | 6             |                 |                |
| 3     | Maternal hypertensive disorders                                  | 14138              | 677                       | 953            | 735          | 1               | 7             |                 |                |
| 3     | Maternal obstructed labor and uterine rupture                    | 14249              | 700                       | 956            | 573          | 1               | 6             |                 |                |
| 3     | Maternal abortion, miscarriage, and ectopic pregnancy            | 14878              | 710                       | 1153           | 596          | 1               | 7             |                 |                |
| 3     | Indirect maternal deaths                                         | 12579              | 500                       | 871            | 754          | 1               | 7             |                 |                |
| 3     | Late maternal deaths                                             | 6337               | 251                       |                | 147          |                 |               |                 |                |
| 3     | Maternal deaths aggravated by HIV/AIDS                           | 15137              | 733                       | 1736           | 1100         | 4472            | 758           |                 |                |
| 3     | Other maternal disorders                                         | 14529              | 706                       | 353            | 711          | 1               | 5             |                 |                |
| 2     | Neonatal disorders                                               | 15957              | 756                       | 1678           | 558          |                 |               |                 |                |
| 3     | Neonatal preterm birth complications                             | 14843              | 729                       | 611            | 558          |                 |               |                 |                |
| 3     | Neonatal encephalopathy due to birth asphyxia and trauma         | 14757              | 642                       | 590            | 558          |                 |               |                 |                |
| 3     | Neonatal sepsis and other neonatal infections                    | 13710              | 520                       | 331            | 546          |                 |               |                 |                |
| 3     | Hemolytic disease and other neonatal jaundice                    | 14952              | 736                       | 374            |              |                 |               |                 |                |
| 3     | Other neonatal disorders                                         | 14700              | 578                       | 347            | 552          |                 |               |                 |                |
| 2     | Nutritional deficiencies                                         | 15943              | 763                       | 1572           | 526          |                 |               |                 |                |
| 3     | Protein-energy malnutrition                                      | 15649              | 762                       | 1528           |              |                 |               |                 |                |
| 3     | Iodine deficiency                                                | 1470               | 50                        |                |              |                 |               |                 |                |
| 3     | Iron-deficiency anemia                                           | 14905              | 740                       | 1326           | 1            |                 |               |                 |                |
| 3     | Other nutritional deficiencies                                   | 14887              | 725                       |                |              |                 |               |                 |                |
| 2     | Other communicable, maternal, neonatal, and nutritional diseases | 15941              | 764                       | 1475           | 843          |                 |               |                 |                |
| 3     | Sexually transmitted diseases excluding HIV                      | 15917              | 729                       | 591            | 228          |                 |               |                 |                |
| 4     | Syphilis                                                         | 15545              | 724                       |                | 228          |                 |               |                 |                |
| 4     | Chlamydial infection                                             | 13821              | 375                       |                |              |                 |               |                 |                |
| 4     | Gonococcal infection                                             | 15044              | 709                       |                |              |                 |               |                 |                |
| 4     | Other sexually transmitted diseases                              | 15499              | 379                       |                |              |                 |               |                 |                |
| 3     | Hepatitis                                                        | 15924              | 736                       | 1379           |              |                 |               |                 |                |
| 4     | Acute hepatitis A                                                | 13794              | 375                       |                |              |                 |               |                 |                |
| 4     | Hepatitis B                                                      | 14310              | 382                       |                |              |                 |               |                 |                |
| 4     | Hepatitis C                                                      | 13755              | 363                       |                |              |                 |               |                 |                |
| 4     | Acute hepatitis E                                                | 13760              | 368                       |                |              |                 |               |                 |                |
| 3     | Other infectious diseases                                        | 15710              | 764                       | 1308           | 793          |                 |               |                 |                |
| 1     | Non-communicable diseases                                        | 15964              | 764                       | 2125           | 632          |                 |               | 2990            | 14             |
| 2     | Neoplasms                                                        | 15964              | 764                       | 1776           | 630          |                 |               | 2990            |                |
| 3     | Lip and oral cavity cancer                                       | 15634              | 712                       | 585            |              |                 |               | 2758            |                |
| 3     | Nasopharynx cancer                                               | 15627              | 745                       |                |              |                 |               | 2806            |                |
| 3     | Other pharynx cancer                                             | 15630              | 721                       | 374            |              |                 |               | 2782            |                |
| 3     | Esophageal cancer                                                | 15920              | 762                       | 590            |              |                 |               | 2849            |                |
| 3     | Stomach cancer                                                   | 15924              | 764                       | 374            |              |                 |               | 2873            |                |
| 3     | Colon and rectum cancer                                          | 15924              | 763                       | 602            |              |                 |               | 2873            |                |
| 3     | Liver cancer                                                     | 15648              | 764                       | 374            |              |                 |               | 2859            |                |
| 3     | Gallbladder and biliary tract cancer                             | 14595              | 761                       |                |              |                 |               | 2779            |                |
| 3     | Pancreatic cancer                                                | 15330              | 755                       |                |              |                 |               | 2862            |                |
| 3     | Larynx cancer                                                    | 15920              | 744                       | 374            |              |                 |               | 2846            |                |
| 3     | Tracheal, bronchus, and lung cancer                              | 15924              | 763                       | 602            |              |                 |               | 2853            |                |
| 3     | Malignant skin melanoma                                          | 15641              | 761                       |                |              |                 |               | 2704            |                |
| 3     | Non-melanoma skin cancer                                         | 15258              | 707                       |                |              |                 |               |                 |                |
| 4     | Non-melanoma skin cancer (squamous-cell carcinoma)               | 14204              | 384                       |                |              |                 |               |                 |                |
| 3     | Breast cancer                                                    | 15925              | 752                       | 618            | 1            |                 |               | 2861            |                |
| 3     | Cervical cancer                                                  | 15920              | 759                       | 370            |              |                 |               | 2809            |                |
| 3     | Uterine cancer                                                   | 15908              | 756                       | 374            |              |                 |               | 2831            |                |
| 3     | Ovarian cancer                                                   | 15340              | 754                       |                |              |                 |               | 2845            |                |
| 3     | Prostate cancer                                                  | 15921              | 710                       |                |              |                 |               | 2826            |                |
| 3     | Testicular cancer                                                | 14300              | 633                       | 130            |              |                 |               | 2734            |                |
| 3     | Kidney cancer                                                    | 15632              | 762                       |                |              |                 |               | 2716            |                |
| 3     | Bladder cancer                                                   | 15633              | 761                       |                |              |                 |               | 2656            |                |
| 3     | Brain and nervous system cancer                                  | 15330              | 759                       | 378            |              |                 |               | 2885            |                |
| 3     | Thyroid cancer                                                   | 15290              | 728                       |                |              |                 |               | 2826            |                |
| 3     | Mesothelioma                                                     | 7418               | 384                       |                |              |                 |               |                 |                |
| 3     | Hodgkin lymphoma                                                 | 15633              | 742                       |                |              |                 |               | 2762            |                |
| 3     | Non-Hodgkin lymphoma                                             | 15632              | 763                       |                |              |                 |               | 2860            |                |
| 3     | Multiple myeloma                                                 | 15628              | 761                       |                |              |                 |               | 2737            |                |
| 3     | Leukemia                                                         | 15920              | 764                       | 585            | 551          |                 |               | 2925            |                |
| 4     | Acute lymphoid leukemia                                          | 13930              | 384                       |                |              |                 |               | 1130            |                |
| 4     | Chronic lymphoid leukemia                                        | 13925              | 379                       |                |              |                 |               | 1104            |                |
| 4     | Acute myeloid leukemia                                           | 13930              | 384                       |                |              |                 |               | 1118            |                |



**Appendix Table 2. Total number of site years by cause and source type for 2016**

| Level | Cause                                               | Vital Registration | Vital Registration-Sample | Verbal Autopsy | Surveillance | Sibling History | Survey/Census | Cancer Registry | Police Records |
|-------|-----------------------------------------------------|--------------------|---------------------------|----------------|--------------|-----------------|---------------|-----------------|----------------|
| 4     | Chronic myeloid leukemia                            | 13930              | 384                       |                |              |                 |               | 1124            |                |
| 4     | Other leukemia                                      | 15607              | 763                       | 211            |              |                 |               | 1913            |                |
| 3     | Other neoplasms                                     | 15697              | 764                       |                | 72           |                 |               | 2951            |                |
| 2     | Cardiovascular diseases                             | 15964              | 764                       | 1908           | 2            |                 |               |                 |                |
| 3     | Rheumatic heart disease                             | 15927              | 764                       | 386            |              |                 |               |                 |                |
| 3     | Ischemic heart disease                              | 15952              | 764                       | 1737           |              |                 |               |                 |                |
| 3     | Cerebrovascular disease                             | 15952              | 764                       | 1602           | 1            |                 |               |                 |                |
| 4     | Ischemic stroke                                     | 14480              | 761                       |                |              |                 |               |                 |                |
| 4     | Hemorrhagic stroke                                  | 14479              | 764                       |                |              |                 |               |                 |                |
| 3     | Hypertensive heart disease                          | 15546              | 760                       | 374            |              |                 |               |                 |                |
| 3     | Cardiomyopathy and myocarditis                      | 15631              | 755                       | 382            |              |                 |               |                 |                |
| 4     | Myocarditis                                         | 13912              | 384                       |                |              |                 |               |                 |                |
| 4     | Alcoholic cardiomyopathy                            | 13912              | 384                       | 8              |              |                 |               |                 |                |
| 4     | Other cardiomyopathy                                | 13912              | 384                       | 8              |              |                 |               |                 |                |
| 3     | Atrial fibrillation and flutter                     | 13796              | 343                       |                |              |                 |               |                 |                |
| 3     | Aortic aneurysm                                     | 14889              | 630                       |                |              |                 |               |                 |                |
| 3     | Peripheral artery disease                           | 13762              | 364                       |                |              |                 |               |                 |                |
| 3     | Endocarditis                                        | 14882              | 691                       |                |              |                 |               |                 |                |
| 3     | Other cardiovascular and circulatory diseases       | 15821              | 764                       | 1              |              |                 |               |                 |                |
| 2     | Chronic respiratory diseases                        | 15948              | 764                       | 1768           | 517          |                 |               |                 |                |
| 3     | Chronic obstructive pulmonary disease               | 13857              | 764                       |                |              |                 |               |                 |                |
| 3     | Pneumoconiosis                                      | 13847              | 384                       |                |              |                 |               |                 |                |
| 4     | Silicosis                                           | 13839              | 384                       |                |              |                 |               |                 |                |
| 4     | Asbestosis                                          | 13838              | 383                       |                |              |                 |               |                 |                |
| 4     | Coal workers pneumoconiosis                         | 13815              | 382                       |                |              |                 |               |                 |                |
| 4     | Other pneumoconiosis                                | 13827              | 382                       |                |              |                 |               |                 |                |
| 3     | Asthma                                              | 13845              | 383                       |                |              |                 |               |                 |                |
| 3     | Interstitial lung disease and pulmonary sarcoidosis | 13844              | 382                       |                |              |                 |               |                 |                |
| 3     | Other chronic respiratory diseases                  | 13840              | 761                       |                |              |                 |               |                 |                |
| 2     | Cirrhosis and other chronic liver diseases          | 15940              | 764                       | 1436           |              |                 |               |                 |                |
| 2     | Digestive diseases                                  | 15929              | 764                       | 1561           | 546          |                 |               |                 |                |
| 3     | Peptic ulcer disease                                | 15915              | 754                       |                |              |                 |               |                 |                |
| 3     | Gastritis and duodenitis                            | 14918              | 384                       |                |              |                 |               |                 |                |
| 3     | Appendicitis                                        | 15920              | 763                       | 375            |              |                 |               |                 |                |
| 3     | Paralytic ileus and intestinal obstruction          | 15620              | 752                       | 551            |              |                 |               |                 |                |
| 3     | Inguinal, femoral, and abdominal hernia             | 15511              | 379                       | 678            |              |                 |               |                 |                |
| 3     | Inflammatory bowel disease                          | 13824              | 383                       |                |              |                 |               |                 |                |
| 3     | Vascular intestinal disorders                       | 13812              | 373                       |                |              |                 |               |                 |                |
| 3     | Gallbladder and biliary diseases                    | 15816              | 763                       |                |              |                 |               |                 |                |
| 3     | Pancreatitis                                        | 14359              | 384                       |                |              |                 |               |                 |                |
| 3     | Other digestive diseases                            | 14881              | 763                       |                |              |                 |               |                 |                |
| 2     | Neurological disorders                              | 15932              | 747                       | 1159           | 553          |                 |               |                 |                |
| 3     | Alzheimer disease and other dementias               | 15544              | 681                       | 1              |              |                 |               |                 |                |
| 3     | Parkinson disease                                   | 14418              | 572                       |                |              |                 |               |                 |                |
| 3     | Epilepsy                                            | 15804              | 729                       | 1093           |              |                 |               |                 |                |
| 3     | Multiple sclerosis                                  | 12947              | 163                       |                |              |                 |               |                 |                |
| 3     | Motor neuron disease                                | 13792              | 373                       |                |              |                 |               |                 |                |
| 3     | Other neurological disorders                        | 13835              | 382                       |                |              |                 |               |                 |                |
| 2     | Mental and substance use disorders                  | 15846              | 757                       | 505            |              |                 |               |                 | 14             |
| 3     | Alcohol use disorders                               | 15505              | 752                       | 491            |              |                 |               |                 |                |
| 3     | Drug use disorders                                  | 15732              | 750                       | 482            |              |                 |               |                 | 14             |
| 4     | Opioid use disorders                                | 13836              | 749                       |                |              |                 |               |                 |                |
| 4     | Cocaine use disorders                               | 13830              | 749                       |                |              |                 |               |                 |                |
| 4     | Amphetamine use disorders                           | 13828              | 749                       |                |              |                 |               |                 |                |
| 4     | Other drug use disorders                            | 13841              | 749                       |                |              |                 |               |                 |                |
| 3     | Eating disorders                                    | 13026              | 378                       |                |              |                 |               |                 |                |
| 4     | Anorexia nervosa                                    | 13016              | 378                       |                |              |                 |               |                 |                |
| 4     | Bulimia nervosa                                     | 12812              | 337                       |                |              |                 |               |                 |                |
| 2     | Diabetes, urogenital, blood, and endocrine diseases | 15940              | 764                       | 1721           |              |                 |               |                 |                |
| 3     | Diabetes mellitus                                   | 15940              | 757                       | 1436           |              |                 |               |                 |                |
| 3     | Acute glomerulonephritis                            | 15186              | 763                       |                |              |                 |               |                 |                |
| 3     | Chronic kidney disease                              | 15938              | 764                       | 1632           |              |                 |               |                 |                |
| 4     | Chronic kidney disease due to diabetes mellitus     | 13829              | 763                       |                |              |                 |               |                 |                |
| 4     | Chronic kidney disease due to hypertension          | 13838              | 764                       |                |              |                 |               |                 |                |
| 4     | Chronic kidney disease due to glomerulonephritis    | 13829              | 763                       |                |              |                 |               |                 |                |

**Appendix Table 2. Total number of site years by cause and source type for 2016**

| Level | Cause                                               | Vital Registration | Vital Registration-Sample | Verbal Autopsy | Surveillance | Sibling History | Survey/Census | Cancer Registry | Police Records |
|-------|-----------------------------------------------------|--------------------|---------------------------|----------------|--------------|-----------------|---------------|-----------------|----------------|
| 4     | Chronic kidney disease due to other causes          | 13828              | 762                       |                |              |                 |               |                 |                |
| 3     | Urinary diseases and male infertility               | 15919              | 764                       | 598            |              |                 |               |                 |                |
| 4     | Interstitial nephritis and urinary tract infections | 15918              | 764                       | 1              |              |                 |               |                 |                |
| 4     | Urolithiasis                                        | 15566              | 763                       |                |              |                 |               |                 |                |
| 4     | Other urinary diseases                              | 14311              | 763                       |                |              |                 |               |                 |                |
| 3     | Gynecological diseases                              | 15846              | 750                       | 872            |              |                 |               |                 |                |
| 4     | Uterine fibroids                                    | 13821              | 381                       |                |              |                 |               |                 |                |
| 4     | Polycystic ovarian syndrome                         | 9941               | 213                       |                |              |                 |               |                 |                |
| 4     | Endometriosis                                       | 10378              | 222                       |                |              |                 |               |                 |                |
| 4     | Genital prolapse                                    | 13666              | 280                       |                |              |                 |               |                 |                |
| 4     | Other gynecological diseases                        | 13804              | 381                       |                |              |                 |               |                 |                |
| 3     | Hemoglobinopathies and hemolytic anemias            | 15859              | 725                       | 1283           |              |                 |               |                 |                |
| 4     | Thalassemias                                        | 14358              | 724                       | 264            |              |                 |               |                 |                |
| 4     | Sickle cell disorders                               | 13851              | 724                       | 636            |              |                 |               |                 |                |
| 4     | G6PD deficiency                                     | 1134               | 36                        |                |              |                 |               |                 |                |
| 4     | Other hemoglobinopathies and hemolytic anemias      | 13835              | 725                       |                |              |                 |               |                 |                |
| 3     | Endocrine, metabolic, blood, and immune disorders   | 15906              | 700                       | 981            |              |                 |               |                 |                |
| 2     | Musculoskeletal disorders                           | 15576              | 763                       |                |              |                 |               |                 |                |
| 3     | Rheumatoid arthritis                                | 14461              | 641                       |                |              |                 |               |                 |                |
| 3     | Other musculoskeletal disorders                     | 14492              | 763                       |                |              |                 |               |                 |                |
| 2     | Other non-communicable diseases                     | 15964              | 764                       | 1511           | 559          |                 |               |                 |                |
| 3     | Congenital birth defects                            | 15964              | 761                       | 1440           | 559          |                 |               |                 |                |
| 4     | Neural tube defects                                 | 15072              | 688                       |                | 548          |                 |               |                 |                |
| 4     | Congenital heart anomalies                          | 15794              | 755                       | 349            | 557          |                 |               |                 |                |
| 4     | Orofacial clefts                                    | 7484               | 238                       |                |              |                 |               |                 |                |
| 4     | Down syndrome                                       | 13573              | 365                       |                | 540          |                 |               |                 |                |
| 4     | Other chromosomal abnormalities                     | 13774              | 583                       |                |              |                 |               |                 |                |
| 4     | Congenital musculoskeletal and limb anomalies       | 13700              | 364                       |                |              |                 |               |                 |                |
| 4     | Urogenital congenital anomalies                     | 13731              | 382                       |                | 481          |                 |               |                 |                |
| 4     | Digestive congenital anomalies                      | 14410              | 378                       |                |              |                 |               |                 |                |
| 4     | Other congenital birth defects                      | 13938              | 758                       |                |              |                 |               |                 |                |
| 3     | Skin and subcutaneous diseases                      | 15884              | 763                       | 611            |              |                 |               |                 |                |
| 4     | Cellulitis                                          | 13837              | 763                       | 375            |              |                 |               |                 |                |
| 4     | Pyoderma                                            | 14527              | 763                       | 376            |              |                 |               |                 |                |
| 4     | Decubitus ulcer                                     | 13791              | 374                       | 250            |              |                 |               |                 |                |
| 4     | Other skin and subcutaneous diseases                | 13838              | 368                       |                |              |                 |               |                 |                |
| 3     | Sudden infant death syndrome                        | 13499              | 186                       |                |              |                 |               |                 |                |
| 1     | Injuries                                            | 15965              | 764                       | 1898           | 562          |                 | 274           |                 | 1445           |
| 2     | Transport injuries                                  | 15927              | 764                       | 1540           | 557          |                 | 247           |                 | 75             |
| 3     | Road injuries                                       | 14742              | 764                       | 376            |              |                 | 14            |                 | 75             |
| 4     | Pedestrian road injuries                            | 13838              | 384                       | 376            |              |                 |               |                 | 70             |
| 4     | Cyclist road injuries                               | 13831              | 384                       | 376            |              |                 |               |                 | 45             |
| 4     | Motorcyclist road injuries                          | 13838              | 384                       | 374            |              |                 | 2             |                 | 52             |
| 4     | Motor vehicle road injuries                         | 13838              | 384                       | 376            |              |                 | 9             |                 | 63             |
| 4     | Other road injuries                                 | 13831              | 384                       | 376            |              |                 |               |                 | 31             |
| 3     | Other transport injuries                            | 14489              | 384                       | 376            |              |                 | 2             |                 | 2              |
| 2     | Unintentional injuries                              | 15925              | 764                       | 1664           | 558          |                 | 13            |                 |                |
| 3     | Falls                                               | 15925              | 764                       | 1283           | 554          |                 | 7             |                 |                |
| 3     | Drowning                                            | 15903              | 752                       | 1437           | 553          |                 | 4             |                 |                |
| 3     | Fire, heat, and hot substances                      | 15924              | 764                       | 1432           |              |                 | 3             |                 |                |
| 3     | Poisonings                                          | 15864              | 756                       | 580            | 523          |                 | 2             |                 |                |
| 3     | Exposure to mechanical forces                       | 15690              | 764                       | 552            | 558          |                 | 10            |                 |                |
| 4     | Unintentional firearm injuries                      | 15559              | 758                       | 536            |              |                 | 3             |                 |                |
| 4     | Unintentional suffocation                           | 13827              | 702                       | 486            | 558          |                 | 1             |                 |                |
| 4     | Other exposure to mechanical forces                 | 14524              | 764                       | 545            |              |                 | 5             |                 |                |
| 3     | Adverse effects of medical treatment                | 15681              | 764                       | 374            |              |                 | 2             |                 |                |
| 3     | Animal contact                                      | 15101              | 755                       | 1280           |              |                 | 3             |                 |                |
| 4     | Venomous animal contact                             | 14346              | 755                       | 580            |              |                 |               |                 |                |
| 4     | Non-venomous animal contact                         | 13838              | 755                       |                |              |                 |               |                 |                |
| 3     | Foreign body                                        | 14598              | 763                       | 594            |              |                 | 2             |                 |                |
| 4     | Pulmonary aspiration and foreign body in airway     | 13836              | 763                       | 354            |              |                 |               |                 |                |
| 4     | Foreign body in other body part                     | 13825              | 670                       |                |              |                 |               |                 |                |
| 3     | Environmental heat and cold exposure                | 15020              | 764                       | 518            |              |                 | 2             |                 |                |
| 3     | Other unintentional injuries                        | 14665              | 764                       | 598            |              |                 | 3             |                 |                |
| 2     | Self-harm and interpersonal violence                | 15937              | 764                       | 1671           | 1            |                 | 13            |                 | 1370           |

**Appendix Table 2. Total number of site years by cause and source type for 2016**

| Level | Cause                                                                        | Vital Registration | Vital Registration-Sample | Verbal Autopsy | Surveillance | Sibling History | Survey/Census | Cancer Registry | Police Records |
|-------|------------------------------------------------------------------------------|--------------------|---------------------------|----------------|--------------|-----------------|---------------|-----------------|----------------|
| 3     | Self-harm                                                                    | 15937              | 763                       | 1619           |              |                 | 5             |                 |                |
| 4     | Self-harm by firearm                                                         | 13812              | 384                       |                |              |                 |               |                 |                |
| 4     | Self-harm by other specified means                                           | 13829              | 384                       |                |              |                 |               |                 |                |
| 3     | Interpersonal violence                                                       | 15929              | 764                       | 1411           |              |                 | 11            |                 | 1370           |
| 4     | Physical violence by firearm                                                 | 13829              | 384                       | 531            |              |                 | 5             |                 |                |
| 4     | Physical violence by sharp object                                            | 13829              | 384                       | 537            |              |                 | 1             |                 |                |
| 4     | Physical violence by other means                                             | 13829              | 384                       | 536            |              |                 |               |                 |                |
| 2     | Forces of nature, conflict and terrorism, and executions and police conflict | 15920              | 764                       | 536            |              |                 | 10            |                 |                |
| 3     | Exposure to forces of nature                                                 | 14895              | 751                       | 519            |              |                 | 6             |                 |                |
| 3     | Conflict and terrorism                                                       | 15732              | 764                       | 522            |              |                 | 5             |                 |                |
| 3     | Executions and police conflict                                               | 14895              | 658                       | 446            |              |                 | 2             |                 |                |

**Appendix Table 3: List of International Classification of Diseases (ICD) codes mapped to the Global Burden of Disease cause list for causes of death**

| Cause                                                                         | ICD10                                                                                                                                                                                                                                                                                                                                                                                                                                                                                                                                                                                                                                                                                                                                                                                                                                                                                                                                                                                                                                                                                                                                                                                                            | ICD9                                                                                                                                                                                                                                                                                                                                                                                                                                                                                                                                                                                                                                                                                          |
|-------------------------------------------------------------------------------|------------------------------------------------------------------------------------------------------------------------------------------------------------------------------------------------------------------------------------------------------------------------------------------------------------------------------------------------------------------------------------------------------------------------------------------------------------------------------------------------------------------------------------------------------------------------------------------------------------------------------------------------------------------------------------------------------------------------------------------------------------------------------------------------------------------------------------------------------------------------------------------------------------------------------------------------------------------------------------------------------------------------------------------------------------------------------------------------------------------------------------------------------------------------------------------------------------------|-----------------------------------------------------------------------------------------------------------------------------------------------------------------------------------------------------------------------------------------------------------------------------------------------------------------------------------------------------------------------------------------------------------------------------------------------------------------------------------------------------------------------------------------------------------------------------------------------------------------------------------------------------------------------------------------------|
| Communicable, maternal, neonatal, and nutritional diseases                    | A00-A00.9, A01.0-A14, A15-A28.9, A30-A30.9, A32-A39.9, A48.1-A48.2, A48.4-A48.5, A49.1, A50-A58, A60-A60.9, A63-A63.8, A65-A65.0, A68-A70, A74, A74.8-A75.9, A77-A96.9, A98-A98.8, B00-B06.9, B10-B10.8, B15-B17.9, B19-B27.9, B29.4, B33-B33.1, B33.3-B33.8, B47-B48.8, B50-B53.8, B55.0, B56-B57.5, B60-B60.8, B63, B65-B67.9, B69-B72.0, B74.3-B75, B77-B77.9, B83-B83.8, B90-B92, B94.1-B94.2, B95-B95.5, B97.4-B97.6, D50.1-D50.8, D51-D52.0, D52.8-D53.9, D64.3, E00-E02, E40-E46.9, E51-E61.9, E63-E64.0, E64.2-E64.9, F07.1, G00.0-G00.8, G03-G03.8, G04-G05.8, G14-G14.6, H70-H70.9, I00, I02, I02.9, I98.0-I98.1, J01-J01.9, J02.0, J03.0, J04.0, J05-J05.0, J09-J15.8, J16-J16.9, J20-J21.9, J36-J36.0, K67.0-K67.8, K71.2, K71.6, K74.7-K74.8, K75.3, K76.3, K77.0, K93.0-K93.1, M03.1, M12.1, M49.0-M49.1, M73.0-M73.1, M89.6, N74.1-N74.2, N96, N98-N98.9, O00-O07.9, O09-O16.9, O20-O26.9, O28-O36.9, O40-O48.1, O60-O77.9, O80-O92.7, O96-O98.6, O98.8-P04.2, P04.5-P05.9, P07-P15.9, P19-P22.9, P23.0-P23.4, P24-P29.9, P35-P37.2, P37.5-P39.9, P50-P61.9, P70, P70.3-P72.9, P74-P78.9, P80-P81.9, P83-P84, P90-P94.9, P96, P96.3-P96.4, P96.8, R19.7, U04-U04.9, U06-U06.9, U82-U89, Z16-Z16.3 | 001-001.9, 002.0-030.9, 032-034.9, 036-036.3, 036.5-037.9, 040, 040.1-041.0, 042-066.9, 070-074.1, 074.3-075.9, 078.3-078.7, 079-079.7, 080-083.9, 084.0-084.5, 084.7-084.9, 085.0, 086-088, 088.8-088.9, 090-101.6, 104-104.9, 120-124.9, 125.4-125.9, 127-127.1, 128-129.0, 136-136.2, 137-139.0, 244.2, 260-263.9, 265-269.9, 280.1-280.8, 281.0-281.9, 320.0-320.8, 321-323.9, 381-383.9, 390-390.9, 392, 392.9, 425.6, 461-461.9, 464.0, 464.2, 464.4, 464.8-464.9, 466-469, 470.0, 475-475.9, 476.9, 480-482.8, 483.0-483.9, 484.0-484.7, 487-489, 630-636.9, 638-638.9, 640-679.1, 716.0, 730.4-730.6, 760-760.6, 760.8-768, 768.2-770, 770.1-775, 775.4-779.3, 779.6-779.8, V09-V09.9 |
| HIV/AIDS and tuberculosis                                                     | A10-A14, A15-A19.9, B20-B24.9, B90-B90.9, K67.3, K93.0, M49.0, N74.1-N74.2, P37.0, U84.3                                                                                                                                                                                                                                                                                                                                                                                                                                                                                                                                                                                                                                                                                                                                                                                                                                                                                                                                                                                                                                                                                                                         | 010-019.9, 042-044.9, 137-137.9, 138.0-138.9, 730.4-730.6                                                                                                                                                                                                                                                                                                                                                                                                                                                                                                                                                                                                                                     |
| Tuberculosis                                                                  | A10-A14, A15-A19.9, B90-B90.9, K67.3, K93.0, M49.0, N74.1-N74.2, P37.0, U84.3                                                                                                                                                                                                                                                                                                                                                                                                                                                                                                                                                                                                                                                                                                                                                                                                                                                                                                                                                                                                                                                                                                                                    | 010-019.9, 137-137.9, 138.0-138.9, 730.4-730.6                                                                                                                                                                                                                                                                                                                                                                                                                                                                                                                                                                                                                                                |
| Drug-susceptible tuberculosis                                                 | A10-A14, A15-A19.9, B90-B90.9, K67.3, K93.0, M49.0, P37.0                                                                                                                                                                                                                                                                                                                                                                                                                                                                                                                                                                                                                                                                                                                                                                                                                                                                                                                                                                                                                                                                                                                                                        | 010-019.9                                                                                                                                                                                                                                                                                                                                                                                                                                                                                                                                                                                                                                                                                     |
| Multidrug-resistant tuberculosis without extensive drug resistance            | U84.3                                                                                                                                                                                                                                                                                                                                                                                                                                                                                                                                                                                                                                                                                                                                                                                                                                                                                                                                                                                                                                                                                                                                                                                                            |                                                                                                                                                                                                                                                                                                                                                                                                                                                                                                                                                                                                                                                                                               |
| Extensively drug-resistant tuberculosis                                       |                                                                                                                                                                                                                                                                                                                                                                                                                                                                                                                                                                                                                                                                                                                                                                                                                                                                                                                                                                                                                                                                                                                                                                                                                  |                                                                                                                                                                                                                                                                                                                                                                                                                                                                                                                                                                                                                                                                                               |
| HIV/AIDS                                                                      | B20-B24.9                                                                                                                                                                                                                                                                                                                                                                                                                                                                                                                                                                                                                                                                                                                                                                                                                                                                                                                                                                                                                                                                                                                                                                                                        | 042-044.9                                                                                                                                                                                                                                                                                                                                                                                                                                                                                                                                                                                                                                                                                     |
| Drug-susceptible HIV/AIDS - Tuberculosis                                      | B20.0                                                                                                                                                                                                                                                                                                                                                                                                                                                                                                                                                                                                                                                                                                                                                                                                                                                                                                                                                                                                                                                                                                                                                                                                            |                                                                                                                                                                                                                                                                                                                                                                                                                                                                                                                                                                                                                                                                                               |
| Multidrug-resistant HIV/AIDS - Tuberculosis without extensive drug resistance |                                                                                                                                                                                                                                                                                                                                                                                                                                                                                                                                                                                                                                                                                                                                                                                                                                                                                                                                                                                                                                                                                                                                                                                                                  |                                                                                                                                                                                                                                                                                                                                                                                                                                                                                                                                                                                                                                                                                               |
| Extensively drug-resistant HIV/AIDS - Tuberculosis                            |                                                                                                                                                                                                                                                                                                                                                                                                                                                                                                                                                                                                                                                                                                                                                                                                                                                                                                                                                                                                                                                                                                                                                                                                                  |                                                                                                                                                                                                                                                                                                                                                                                                                                                                                                                                                                                                                                                                                               |
| HIV/AIDS resulting in other diseases                                          | B20.1-B23.9, B24.0                                                                                                                                                                                                                                                                                                                                                                                                                                                                                                                                                                                                                                                                                                                                                                                                                                                                                                                                                                                                                                                                                                                                                                                               | 042-044.9                                                                                                                                                                                                                                                                                                                                                                                                                                                                                                                                                                                                                                                                                     |
| Diarrhea, lower respiratory, and other common infectious diseases             | A00-A00.9, A01.0-A09.9, A33-A37.9, A39-A39.9, A48.1, A70, A83-A87.9, B01-B02.9, B05-B05.9, B94.1, B97.4-B97.6, F07.1, G00.0-G00.8, G03-G03.8, G04-G05.8, H70-H70.9, J01-J01.9, J04.0, J05-J05.0, J09-J15.8, J16-J16.9, J20-J21.9, J36-J36.0, P23.0-P23.4, P35.8, R19.7, U04-U04.9                                                                                                                                                                                                                                                                                                                                                                                                                                                                                                                                                                                                                                                                                                                                                                                                                                                                                                                                | 001-001.9, 002.0-009.9, 032-033.9, 036-036.3, 036.5-037.9, 047-049.9, 052-053.9, 055-055.9, 062-064.9, 079.6, 139.0, 320.0-320.8, 321-323, 323.4-323.9, 381-383.9, 461-461.9, 464.0, 464.2, 464.4, 464.8-464.9, 466-469, 470.0, 475-475.9, 476.9, 480-482.8, 483.0-483.9, 484.0-484.3, 484.6-484.7, 487-489, 771.3                                                                                                                                                                                                                                                                                                                                                                            |
| Diarrheal diseases                                                            | A00-A00.9, A02-A04.1, A04.3, A04.5-A07, A07.2-A07.4, A08-A09.9, R19.7                                                                                                                                                                                                                                                                                                                                                                                                                                                                                                                                                                                                                                                                                                                                                                                                                                                                                                                                                                                                                                                                                                                                            | 001-001.9, 003-006.9, 007.4-007.8, 008.2-009.9                                                                                                                                                                                                                                                                                                                                                                                                                                                                                                                                                                                                                                                |
| Intestinal infectious diseases                                                | A01.0-A01.4, A04.2, A04.4, A07.0-A07.1, A07.8-A07.9                                                                                                                                                                                                                                                                                                                                                                                                                                                                                                                                                                                                                                                                                                                                                                                                                                                                                                                                                                                                                                                                                                                                                              | 002.0-002.9, 007-007.3, 007.9-008.1                                                                                                                                                                                                                                                                                                                                                                                                                                                                                                                                                                                                                                                           |
| Typhoid fever                                                                 | A01.0                                                                                                                                                                                                                                                                                                                                                                                                                                                                                                                                                                                                                                                                                                                                                                                                                                                                                                                                                                                                                                                                                                                                                                                                            | 002.0                                                                                                                                                                                                                                                                                                                                                                                                                                                                                                                                                                                                                                                                                         |
| Paratyphoid fever                                                             | A01.1-A01.4                                                                                                                                                                                                                                                                                                                                                                                                                                                                                                                                                                                                                                                                                                                                                                                                                                                                                                                                                                                                                                                                                                                                                                                                      | 002.1-002.9                                                                                                                                                                                                                                                                                                                                                                                                                                                                                                                                                                                                                                                                                   |
| Other intestinal infectious diseases                                          | A04.2, A04.4, A07.0-A07.1, A07.8-A07.9                                                                                                                                                                                                                                                                                                                                                                                                                                                                                                                                                                                                                                                                                                                                                                                                                                                                                                                                                                                                                                                                                                                                                                           | 007-007.3, 007.9-008.1                                                                                                                                                                                                                                                                                                                                                                                                                                                                                                                                                                                                                                                                        |
| Lower respiratory infections                                                  | A48.1, A70, B97.4-B97.6, J09-J15.8, J16-J16.9, J20-J21.9, P23.0-P23.4, U04-U04.9                                                                                                                                                                                                                                                                                                                                                                                                                                                                                                                                                                                                                                                                                                                                                                                                                                                                                                                                                                                                                                                                                                                                 | 079.6, 466-469, 470.0, 480-482.8, 483.0-483.9, 484.1-484.2, 484.6-484.7, 487-489                                                                                                                                                                                                                                                                                                                                                                                                                                                                                                                                                                                                              |
| Upper respiratory infections                                                  | J01-J01.9, J04.0, J05-J05.0, J36-J36.0                                                                                                                                                                                                                                                                                                                                                                                                                                                                                                                                                                                                                                                                                                                                                                                                                                                                                                                                                                                                                                                                                                                                                                           | 461-461.9, 464.0, 464.2, 464.4, 464.8-464.9, 475-475.9, 476.9                                                                                                                                                                                                                                                                                                                                                                                                                                                                                                                                                                                                                                 |
| Otitis media                                                                  | H70-H70.9                                                                                                                                                                                                                                                                                                                                                                                                                                                                                                                                                                                                                                                                                                                                                                                                                                                                                                                                                                                                                                                                                                                                                                                                        | 381-383.9                                                                                                                                                                                                                                                                                                                                                                                                                                                                                                                                                                                                                                                                                     |
| Meningitis                                                                    | A39-A39.9, A87-A87.9, G00.0-G00.8, G03-G03.8                                                                                                                                                                                                                                                                                                                                                                                                                                                                                                                                                                                                                                                                                                                                                                                                                                                                                                                                                                                                                                                                                                                                                                     | 036-036.3, 036.5-036.9, 047-049.9, 320.0-320.8, 321-322.9                                                                                                                                                                                                                                                                                                                                                                                                                                                                                                                                                                                                                                     |

| Appendix Table 3: List of International Classification of Diseases (ICD) codes mapped to the Global Burden of Disease cause list for causes of death |                                                                                                                                                                                                                                    |                                                                                                                                                                   |
|------------------------------------------------------------------------------------------------------------------------------------------------------|------------------------------------------------------------------------------------------------------------------------------------------------------------------------------------------------------------------------------------|-------------------------------------------------------------------------------------------------------------------------------------------------------------------|
| Cause                                                                                                                                                | ICD10                                                                                                                                                                                                                              | ICD9                                                                                                                                                              |
| Pneumococcal meningitis                                                                                                                              | G00.1                                                                                                                                                                                                                              | 320.1                                                                                                                                                             |
| H influenzae type B meningitis                                                                                                                       | G00.0                                                                                                                                                                                                                              | 320.0                                                                                                                                                             |
| Meningococcal meningitis                                                                                                                             | A39-A39.9                                                                                                                                                                                                                          | 036-036.3, 036.5-036.9                                                                                                                                            |
| Other meningitis                                                                                                                                     | A87-A87.9, G00.2-G00.8, G03-G03.8                                                                                                                                                                                                  | 047-049.9, 320.2-320.8, 321-322.9                                                                                                                                 |
| Encephalitis                                                                                                                                         | A83-A86.4, B94.1, F07.1, G04-G05.8                                                                                                                                                                                                 | 062-064.9, 139.0, 323, 323.4-323.9                                                                                                                                |
| Diphtheria                                                                                                                                           | A36-A36.9                                                                                                                                                                                                                          | 032-032.9                                                                                                                                                         |
| Whooping cough                                                                                                                                       | A37-A37.9                                                                                                                                                                                                                          | 033-033.9, 484.3                                                                                                                                                  |
| Tetanus                                                                                                                                              | A33-A35.0                                                                                                                                                                                                                          | 037-037.9, 771.3                                                                                                                                                  |
| Measles                                                                                                                                              | B05-B05.9                                                                                                                                                                                                                          | 055-055.9, 484.0                                                                                                                                                  |
| Varicella and herpes zoster                                                                                                                          | B01-B02.9, P35.8                                                                                                                                                                                                                   | 052-053.9                                                                                                                                                         |
| Neglected tropical diseases and malaria                                                                                                              | A30-A30.9, A68-A68.9, A69.2-A69.9, A75-A75.9, A77-A79.9, A82-A82.9, A90-A96.9, A98-A98.8, B33.0-B33.1, B50-B53.8, B55.0, B56-B57.5, B60-B60.8, B65-B67.9, B69-B72.0, B74.3-B75, B77-B77.9, B83-B83.8, B92, K93.1, P37.1, U06-U06.9 | 030-030.9, 060-061.8, 065-066.9, 071-071.9, 080-083.9, 084.0-084.5, 084.7-084.9, 085.0, 086-088, 088.8-088.9, 120-124.9, 125.4-125.9, 127-127.1, 128-129.0, 425.6 |
| Malaria                                                                                                                                              | B50-B53.8                                                                                                                                                                                                                          | 084.0-084.5, 084.7-084.9                                                                                                                                          |
| Leprosy                                                                                                                                              | A30-A30.9                                                                                                                                                                                                                          | 030-030.9                                                                                                                                                         |
| Chagas disease                                                                                                                                       | B57-B57.5, K93.1                                                                                                                                                                                                                   | 086-086.2, 086.9, 425.6                                                                                                                                           |
| Leishmaniasis                                                                                                                                        | B55.0                                                                                                                                                                                                                              | 085.0                                                                                                                                                             |
| Visceral leishmaniasis                                                                                                                               | B55.0                                                                                                                                                                                                                              | 085.0                                                                                                                                                             |
| African trypanosomiasis                                                                                                                              | B56-B56.9                                                                                                                                                                                                                          | 086.3-086.5                                                                                                                                                       |
| Schistosomiasis                                                                                                                                      | B65-B65.9                                                                                                                                                                                                                          | 120-120.9                                                                                                                                                         |
| Cysticercosis                                                                                                                                        | B69-B69.9                                                                                                                                                                                                                          | 123.1                                                                                                                                                             |
| Cystic echinococcosis                                                                                                                                | B67-B67.4, B67.8-B67.9                                                                                                                                                                                                             | 122-122.4, 122.8-122.9                                                                                                                                            |
| Dengue                                                                                                                                               | A90-A91.9                                                                                                                                                                                                                          | 061-061.8                                                                                                                                                         |
| Yellow fever                                                                                                                                         | A95-A95.9                                                                                                                                                                                                                          | 060-060.9                                                                                                                                                         |
| Rabies                                                                                                                                               | A82-A82.9                                                                                                                                                                                                                          | 071-071.9                                                                                                                                                         |
| Intestinal nematode infections                                                                                                                       | B77-B77.9                                                                                                                                                                                                                          | 127.0                                                                                                                                                             |
| Ascariasis                                                                                                                                           | B77-B77.9                                                                                                                                                                                                                          | 127.0                                                                                                                                                             |
| Ebola                                                                                                                                                | A98.4                                                                                                                                                                                                                              |                                                                                                                                                                   |
| Zika virus                                                                                                                                           | U06-U06.9                                                                                                                                                                                                                          |                                                                                                                                                                   |
| Other neglected tropical diseases                                                                                                                    | A68-A68.9, A69.2-A69.9, A75-A75.9, A77-A79.9, A92-A94.0, A96-A96.9, A98-A98.3, A98.5-A98.8, B33.0-B33.1, B60-B60.8, B67.5-B67.7, B70-B71.9, B74.3-B75, B83-B83.8, P37.1                                                            | 065-066.9, 080-083.9, 087-088, 088.8-088.9, 122.5-122.7, 123-123.0, 123.2-124.9, 125.4-125.6, 125.9, 127, 127.1, 128-129.0                                        |
| Maternal disorders                                                                                                                                   | N96, N98-N98.9, O00-O07.9, O09-O16.9, O20-O26.9, O28-O36.9, O40-O48.1, O60-O77.9, O80-O92.7, O96-O98.6, O98.8-O99.9                                                                                                                | 630-636.9, 638-638.9, 640-679.1                                                                                                                                   |
| Maternal hemorrhage                                                                                                                                  | O20-O20.9, O43.2, O44-O46.9, O62-O62.9, O67-O67.9, O70, O72-O72.3                                                                                                                                                                  | 640-641.9, 661-661.9, 665, 666-666.9                                                                                                                              |
| Maternal sepsis and other maternal infections                                                                                                        | O23-O23.9, O85-O86.8, O91-O91.2                                                                                                                                                                                                    | 659.3, 670-670.9                                                                                                                                                  |
| Maternal hypertensive disorders                                                                                                                      | O10-O16.9                                                                                                                                                                                                                          | 642-642.9                                                                                                                                                         |
| Maternal obstructed labor and uterine rupture                                                                                                        | O32-O33.9, O64-O66.9, O71-O71.9                                                                                                                                                                                                    | 652-653.9, 660-660.9, 665.0-665.3                                                                                                                                 |
| Maternal abortion, miscarriage, and ectopic pregnancy                                                                                                | N96, O00-O07.9                                                                                                                                                                                                                     | 630-636.9, 638-638.9, 646.3                                                                                                                                       |
| Indirect maternal deaths                                                                                                                             | O24-O25.3, O98-O98.6, O98.8-O99.9                                                                                                                                                                                                  | 646-646.2, 646.4-649.9                                                                                                                                            |
| Late maternal deaths                                                                                                                                 | O96-O97.9                                                                                                                                                                                                                          |                                                                                                                                                                   |
| Maternal deaths aggravated by HIV/AIDS                                                                                                               |                                                                                                                                                                                                                                    |                                                                                                                                                                   |
| Other maternal disorders                                                                                                                             | N98-N98.9, O09-O09.9, O21-O22.9, O26-O26.9, O28-O31.8, O34-O36.9, O40-O43.1, O43.8-O43.9, O47-O48.1, O60-O61.9, O63-O63.9, O68-O69.9, O70.0-O70.9, O73-O77.9, O80-O84.9, O87-O90.9, O92-O92.7                                      | 643-645.2, 650-651.9, 654-659.2, 659.4-659.9, 662-664.9, 665.4-665.9, 667-669.9, 671-679.1                                                                        |
| Neonatal disorders                                                                                                                                   | P00-P04.2, P04.5-P05.9, P07-P15.9, P19-P22.9, P24-P29.9, P36-P36.9, P38-P39.9, P50-P61.9, P70, P70.3-P72.9, P74-P78.9, P80-P81.9, P83-P84, P90-P94.9, P96, P96.3-P96.4, P96.8                                                      | 760-760.6, 760.8-768, 768.2-770, 770.1-771, 771.4-775, 775.4-779.3, 779.6-779.8                                                                                   |
| Neonatal preterm birth complications                                                                                                                 | P01.0-P01.1, P07-P07.3, P22-P22.9, P25-P28.9, P61.2, P77-P77.9                                                                                                                                                                     | 761.0-761.1, 765-765.9, 769-769.9, 770.2-770.9, 776.6, 777.5-777.6                                                                                                |
| Neonatal encephalopathy due to birth asphyxia and trauma                                                                                             | P01.7, P02-P03.9, P10-P15.9, P20-P21.9, P24-P24.9, P90-P91.9                                                                                                                                                                       | 761.7-763.9, 767-768, 768.2-768.9, 770.1, 772.1-772.9, 779.0-779.2                                                                                                |
| Neonatal sepsis and other neonatal infections                                                                                                        | P36-P36.9, P38-P39.9                                                                                                                                                                                                               | 771.4-771.9                                                                                                                                                       |
| Hemolytic disease and other neonatal jaundice                                                                                                        | P55-P59.9                                                                                                                                                                                                                          | 773-774.9                                                                                                                                                         |
| Other neonatal disorders                                                                                                                             | P00-P01, P01.2-P01.6, P01.8-P01.9, P04-P04.2, P04.5-P05.9, P08-P09, P19-P19.9, P29-P29.9, P50-P54.9, P60-P61.1, P61.3-P61.9, P70, P70.3-P72.9, P74-P76.9, P78-P78.9, P80-P81.9, P83-P84, P92-P94.9, P96, P96.3-P96.4, P96.8        | 760-760.6, 760.8-761, 761.2-761.6, 764-764.9, 766-766.9, 770, 771, 772-772.0, 775, 775.4-776.5, 776.7-777.4, 777.7-779, 779.3, 779.6-779.8                        |
| Nutritional deficiencies                                                                                                                             | D50.1-D50.8, D51-D52.0, D52.8-D53.9, D64.3, E00-E02, E40-E46.9, E51-E61.9, E63-E64.0, E64.2-E64.9, M12.1                                                                                                                           | 244.2, 260-263.9, 265-269.9, 280.1-280.8, 281.0-281.9, 716.0                                                                                                      |
| Protein-energy malnutrition                                                                                                                          | E40-E46.9, E64.0                                                                                                                                                                                                                   | 260-263.9                                                                                                                                                         |

**Appendix Table 3: List of International Classification of Diseases (ICD) codes mapped to the Global Burden of Disease cause list for causes of death**

| Cause                                                            | ICD10                                                                                                                                                                                                                                                                                                                                                                                                                                                                                                                                                                                                                                                                                                                                                                                                                                                                                                                                                                                                                                                                                                                                                                                                                                                                                                                                                                                                                                                                                                                                                                                                                                                                                                                                                                                                                                                                                                                                                                                                                                                                                                                                                                                                                                                                                                                                                                                                                                                                                      | ICD9                                                                                                                                                                                                                                                                                                                                                                                                                                                                                                                                                                                                                                                                                                                                                                                                                                                                                                                                                                                                                                                                                                                                                                                                                                                                                                                                                                                                                                                                                                                                                                                                                                                                                                                                                                                                                                                                                                        |
|------------------------------------------------------------------|--------------------------------------------------------------------------------------------------------------------------------------------------------------------------------------------------------------------------------------------------------------------------------------------------------------------------------------------------------------------------------------------------------------------------------------------------------------------------------------------------------------------------------------------------------------------------------------------------------------------------------------------------------------------------------------------------------------------------------------------------------------------------------------------------------------------------------------------------------------------------------------------------------------------------------------------------------------------------------------------------------------------------------------------------------------------------------------------------------------------------------------------------------------------------------------------------------------------------------------------------------------------------------------------------------------------------------------------------------------------------------------------------------------------------------------------------------------------------------------------------------------------------------------------------------------------------------------------------------------------------------------------------------------------------------------------------------------------------------------------------------------------------------------------------------------------------------------------------------------------------------------------------------------------------------------------------------------------------------------------------------------------------------------------------------------------------------------------------------------------------------------------------------------------------------------------------------------------------------------------------------------------------------------------------------------------------------------------------------------------------------------------------------------------------------------------------------------------------------------------|-------------------------------------------------------------------------------------------------------------------------------------------------------------------------------------------------------------------------------------------------------------------------------------------------------------------------------------------------------------------------------------------------------------------------------------------------------------------------------------------------------------------------------------------------------------------------------------------------------------------------------------------------------------------------------------------------------------------------------------------------------------------------------------------------------------------------------------------------------------------------------------------------------------------------------------------------------------------------------------------------------------------------------------------------------------------------------------------------------------------------------------------------------------------------------------------------------------------------------------------------------------------------------------------------------------------------------------------------------------------------------------------------------------------------------------------------------------------------------------------------------------------------------------------------------------------------------------------------------------------------------------------------------------------------------------------------------------------------------------------------------------------------------------------------------------------------------------------------------------------------------------------------------------|
| Iodine deficiency                                                | E00-E02                                                                                                                                                                                                                                                                                                                                                                                                                                                                                                                                                                                                                                                                                                                                                                                                                                                                                                                                                                                                                                                                                                                                                                                                                                                                                                                                                                                                                                                                                                                                                                                                                                                                                                                                                                                                                                                                                                                                                                                                                                                                                                                                                                                                                                                                                                                                                                                                                                                                                    | 244.2                                                                                                                                                                                                                                                                                                                                                                                                                                                                                                                                                                                                                                                                                                                                                                                                                                                                                                                                                                                                                                                                                                                                                                                                                                                                                                                                                                                                                                                                                                                                                                                                                                                                                                                                                                                                                                                                                                       |
| Iron-deficiency anemia                                           | D50.1-D50.8                                                                                                                                                                                                                                                                                                                                                                                                                                                                                                                                                                                                                                                                                                                                                                                                                                                                                                                                                                                                                                                                                                                                                                                                                                                                                                                                                                                                                                                                                                                                                                                                                                                                                                                                                                                                                                                                                                                                                                                                                                                                                                                                                                                                                                                                                                                                                                                                                                                                                | 280.1-280.8                                                                                                                                                                                                                                                                                                                                                                                                                                                                                                                                                                                                                                                                                                                                                                                                                                                                                                                                                                                                                                                                                                                                                                                                                                                                                                                                                                                                                                                                                                                                                                                                                                                                                                                                                                                                                                                                                                 |
| Other nutritional deficiencies                                   | D51-D52.0, D52.8-D53.9, D64.3, E51-E61.9, E63-E64, E64.2-E64.3, M12.1                                                                                                                                                                                                                                                                                                                                                                                                                                                                                                                                                                                                                                                                                                                                                                                                                                                                                                                                                                                                                                                                                                                                                                                                                                                                                                                                                                                                                                                                                                                                                                                                                                                                                                                                                                                                                                                                                                                                                                                                                                                                                                                                                                                                                                                                                                                                                                                                                      | 265-269.9, 281.0-281.9, 716.0                                                                                                                                                                                                                                                                                                                                                                                                                                                                                                                                                                                                                                                                                                                                                                                                                                                                                                                                                                                                                                                                                                                                                                                                                                                                                                                                                                                                                                                                                                                                                                                                                                                                                                                                                                                                                                                                               |
| Other communicable, maternal, neonatal, and nutritional diseases | A20-A28.9, A32-A32.9, A38-A38.9, A48.2, A48.4-A48.5, A49.1, A50-A58, A60-A60.9, A63-A63.8, A65-A65.0, A69-A69.1, A74, A74.8-A74.9, A80-A81.9, A88-A89.9, B00-B00.9, B03-B04, B06-B06.9, B10-B10.8, B15-B17.9, B19-B19.9, B25-B27.9, B29.4, B33, B33.3-B33.8, B47-B48.8, B63, B91, B94.2, B95-B95.5, G14-G14.6, I00, I02, I02.9, I98.0-198.1, J02.0, J03.0, K67.0-K67.2, K67.8, K71.2, K71.6, K74.7-K74.8, K75.3, K76.3, K77.0, M03.1, M49.1, M73.0-M73.1, M89.6, P35-P35.3, P35.9, P37, P37.2, P37.5-P37.9, U82-U84, U85-U89, Z16-Z16.3                                                                                                                                                                                                                                                                                                                                                                                                                                                                                                                                                                                                                                                                                                                                                                                                                                                                                                                                                                                                                                                                                                                                                                                                                                                                                                                                                                                                                                                                                                                                                                                                                                                                                                                                                                                                                                                                                                                                                    | 020-029, 034-034.9, 040, 040.1-041.0, 045-046.9, 050-051.9, 054-054.9, 056-059.9, 070-070.9, 072-074.1, 074.3-075.9, 078.3-078.7, 079-079.5, 079.7, 090-101.6, 104-104.9, 136-136.2, 138, 139, 323.0-323.3, 390-390.9, 392, 392.9, 484.4-484.5, 771.0-771.2, V09-V09.9                                                                                                                                                                                                                                                                                                                                                                                                                                                                                                                                                                                                                                                                                                                                                                                                                                                                                                                                                                                                                                                                                                                                                                                                                                                                                                                                                                                                                                                                                                                                                                                                                                      |
| Sexually transmitted diseases excluding HIV                      | A50-A58, A60-A60.9, A63-A63.8, B63, I98.0, K67.0-K67.2, M03.1, M73.0-M73.1                                                                                                                                                                                                                                                                                                                                                                                                                                                                                                                                                                                                                                                                                                                                                                                                                                                                                                                                                                                                                                                                                                                                                                                                                                                                                                                                                                                                                                                                                                                                                                                                                                                                                                                                                                                                                                                                                                                                                                                                                                                                                                                                                                                                                                                                                                                                                                                                                 | 054.1, 090-099.9                                                                                                                                                                                                                                                                                                                                                                                                                                                                                                                                                                                                                                                                                                                                                                                                                                                                                                                                                                                                                                                                                                                                                                                                                                                                                                                                                                                                                                                                                                                                                                                                                                                                                                                                                                                                                                                                                            |
| Syphilis                                                         | A50-A53.9, I98.0, K67.2, M03.1, M73.1                                                                                                                                                                                                                                                                                                                                                                                                                                                                                                                                                                                                                                                                                                                                                                                                                                                                                                                                                                                                                                                                                                                                                                                                                                                                                                                                                                                                                                                                                                                                                                                                                                                                                                                                                                                                                                                                                                                                                                                                                                                                                                                                                                                                                                                                                                                                                                                                                                                      | 090-097.9                                                                                                                                                                                                                                                                                                                                                                                                                                                                                                                                                                                                                                                                                                                                                                                                                                                                                                                                                                                                                                                                                                                                                                                                                                                                                                                                                                                                                                                                                                                                                                                                                                                                                                                                                                                                                                                                                                   |
| Chlamydial infection                                             | A55-A56.8, K67.0                                                                                                                                                                                                                                                                                                                                                                                                                                                                                                                                                                                                                                                                                                                                                                                                                                                                                                                                                                                                                                                                                                                                                                                                                                                                                                                                                                                                                                                                                                                                                                                                                                                                                                                                                                                                                                                                                                                                                                                                                                                                                                                                                                                                                                                                                                                                                                                                                                                                           | 099                                                                                                                                                                                                                                                                                                                                                                                                                                                                                                                                                                                                                                                                                                                                                                                                                                                                                                                                                                                                                                                                                                                                                                                                                                                                                                                                                                                                                                                                                                                                                                                                                                                                                                                                                                                                                                                                                                         |
| Gonococcal infection                                             | A54-A54.9, K67.1, M73.0                                                                                                                                                                                                                                                                                                                                                                                                                                                                                                                                                                                                                                                                                                                                                                                                                                                                                                                                                                                                                                                                                                                                                                                                                                                                                                                                                                                                                                                                                                                                                                                                                                                                                                                                                                                                                                                                                                                                                                                                                                                                                                                                                                                                                                                                                                                                                                                                                                                                    | 098-098.9                                                                                                                                                                                                                                                                                                                                                                                                                                                                                                                                                                                                                                                                                                                                                                                                                                                                                                                                                                                                                                                                                                                                                                                                                                                                                                                                                                                                                                                                                                                                                                                                                                                                                                                                                                                                                                                                                                   |
| Other sexually transmitted diseases                              | A57-A58, A63-A63.8                                                                                                                                                                                                                                                                                                                                                                                                                                                                                                                                                                                                                                                                                                                                                                                                                                                                                                                                                                                                                                                                                                                                                                                                                                                                                                                                                                                                                                                                                                                                                                                                                                                                                                                                                                                                                                                                                                                                                                                                                                                                                                                                                                                                                                                                                                                                                                                                                                                                         | 099.0-099.9                                                                                                                                                                                                                                                                                                                                                                                                                                                                                                                                                                                                                                                                                                                                                                                                                                                                                                                                                                                                                                                                                                                                                                                                                                                                                                                                                                                                                                                                                                                                                                                                                                                                                                                                                                                                                                                                                                 |
| Hepatitis                                                        | B15-B17.9, B19-B19.9, B94.2, K71.2, K71.6, P35.3                                                                                                                                                                                                                                                                                                                                                                                                                                                                                                                                                                                                                                                                                                                                                                                                                                                                                                                                                                                                                                                                                                                                                                                                                                                                                                                                                                                                                                                                                                                                                                                                                                                                                                                                                                                                                                                                                                                                                                                                                                                                                                                                                                                                                                                                                                                                                                                                                                           | 070-070.9                                                                                                                                                                                                                                                                                                                                                                                                                                                                                                                                                                                                                                                                                                                                                                                                                                                                                                                                                                                                                                                                                                                                                                                                                                                                                                                                                                                                                                                                                                                                                                                                                                                                                                                                                                                                                                                                                                   |
| Acute hepatitis A                                                | B15-B15.9                                                                                                                                                                                                                                                                                                                                                                                                                                                                                                                                                                                                                                                                                                                                                                                                                                                                                                                                                                                                                                                                                                                                                                                                                                                                                                                                                                                                                                                                                                                                                                                                                                                                                                                                                                                                                                                                                                                                                                                                                                                                                                                                                                                                                                                                                                                                                                                                                                                                                  | 070.0-070.1                                                                                                                                                                                                                                                                                                                                                                                                                                                                                                                                                                                                                                                                                                                                                                                                                                                                                                                                                                                                                                                                                                                                                                                                                                                                                                                                                                                                                                                                                                                                                                                                                                                                                                                                                                                                                                                                                                 |
| Hepatitis B                                                      | B16-B16.9, B17.0, B19.1, P35.3                                                                                                                                                                                                                                                                                                                                                                                                                                                                                                                                                                                                                                                                                                                                                                                                                                                                                                                                                                                                                                                                                                                                                                                                                                                                                                                                                                                                                                                                                                                                                                                                                                                                                                                                                                                                                                                                                                                                                                                                                                                                                                                                                                                                                                                                                                                                                                                                                                                             | 070.2-070.3                                                                                                                                                                                                                                                                                                                                                                                                                                                                                                                                                                                                                                                                                                                                                                                                                                                                                                                                                                                                                                                                                                                                                                                                                                                                                                                                                                                                                                                                                                                                                                                                                                                                                                                                                                                                                                                                                                 |
| Hepatitis C                                                      | B17.1, B19.2                                                                                                                                                                                                                                                                                                                                                                                                                                                                                                                                                                                                                                                                                                                                                                                                                                                                                                                                                                                                                                                                                                                                                                                                                                                                                                                                                                                                                                                                                                                                                                                                                                                                                                                                                                                                                                                                                                                                                                                                                                                                                                                                                                                                                                                                                                                                                                                                                                                                               | 070.7                                                                                                                                                                                                                                                                                                                                                                                                                                                                                                                                                                                                                                                                                                                                                                                                                                                                                                                                                                                                                                                                                                                                                                                                                                                                                                                                                                                                                                                                                                                                                                                                                                                                                                                                                                                                                                                                                                       |
| Acute hepatitis E                                                | B17.2                                                                                                                                                                                                                                                                                                                                                                                                                                                                                                                                                                                                                                                                                                                                                                                                                                                                                                                                                                                                                                                                                                                                                                                                                                                                                                                                                                                                                                                                                                                                                                                                                                                                                                                                                                                                                                                                                                                                                                                                                                                                                                                                                                                                                                                                                                                                                                                                                                                                                      |                                                                                                                                                                                                                                                                                                                                                                                                                                                                                                                                                                                                                                                                                                                                                                                                                                                                                                                                                                                                                                                                                                                                                                                                                                                                                                                                                                                                                                                                                                                                                                                                                                                                                                                                                                                                                                                                                                             |
| Other infectious diseases                                        | A20-A28.9, A32-A32.9, A38-A38.9, A48.2, A48.4-A48.5, A49.1, A65-A65.0, A69-A69.1, A74, A74.8-A74.9, A80-A81.9, A88-A89.9, B00-B00.9, B03-B04, B06-B06.9, B10-B10.8, B25-B27.9, B29.4, B33, B33.3-B33.8, B47-B48.8, B91, B95-B95.5, G14-G14.6, I00, I02, I02.9, I98.1, J02.0, J03.0, K67.8, K74.7-K74.8, K75.3, K76.3, K77.0, M49.1, M89.6, P35-P35.2, P35.9, P37, P37.2, P37.5-P37.9, U82-U84, U85-U89, Z16-Z16.3                                                                                                                                                                                                                                                                                                                                                                                                                                                                                                                                                                                                                                                                                                                                                                                                                                                                                                                                                                                                                                                                                                                                                                                                                                                                                                                                                                                                                                                                                                                                                                                                                                                                                                                                                                                                                                                                                                                                                                                                                                                                          | 020-029, 034-034.9, 040, 040.1-041.0, 045-046.9, 050-051.9, 054-054.0, 054.2-054.9, 056-059.9, 072-074.1, 074.3-075.9, 078.3-078.7, 079-079.5, 079.7, 100-101.6, 104-104.9, 136-136.2, 138, 139, 323.0-323.3, 390-390.9, 392, 392.9, 484.4-484.5, 771.0-771.2, V09-V09.9                                                                                                                                                                                                                                                                                                                                                                                                                                                                                                                                                                                                                                                                                                                                                                                                                                                                                                                                                                                                                                                                                                                                                                                                                                                                                                                                                                                                                                                                                                                                                                                                                                    |
| Non-communicable diseases                                        | A46-A46.0, A66-A67.9, B18-B18.9, B33.2, B86, C00-C13.9, C15-C25.9, C30-C34.9, C37-C38.8, C40-C41.9, C43-C45.9, C47-C54.9, C56-C57.8, C58-C58.0, C60-C63.8, C64-C67.9, C68.0-C68.8, C69-C75.8, C81-C86.6, C88-C96.9, D00.1-D00.2, D01.0-D01.3, D02.0-D02.3, D03-D06.9, D07.0-D07.2, D07.4-D07.5, D09.0, D09.2-D09.3, D09.8, D10.0-D10.7, D11-D12.9, D13.0-D13.7, D14.0-D14.3, D15-D16.9, D22-D27.9, D28.0-D28.7, D29.0-D29.8, D30.0-D30.8, D31-D36, D36.1-D36.7, D37.1-D37.5, D38.0-D38.5, D39.1-D39.2, D39.8, D40.0-D40.8, D41.0-D41.8, D42-D43.9, D44.0-D44.8, D45-D47.0, D47.2-D47.9, D48.0-D48.6, D49.2-D49.4, D49.6, D52.1, D55-D58.9, D59.0-D59.3, D59.5-D59.6, D60-D61.9, D63.1, D64.0, D64.4, D66-D67, D68.0-D69.8, D70-D75.8, D76-D78.8, D86-D86.9, D89-D89.3, E03-E07.1, E09-E14.9, E15.0, E16.0-E16.9, E20-E34.8, E36-E36.8, E65-E68, E70-E85.2, E88-E89.9, F00-F03.9, F10-F16.9, F18-F19.9, F24, F50.0-F50.5, G10-G13.8, G20-G26.0, G30-G31.9, G35-G37.9, G40-G41.9, G45-G46.8, G47.3, G61-G61.9, G70-G73.7, G90-G90.9, G93.7, G95-G95.9, G97-G97.9, H05.0-H05.1, I01-I01.9, I02.0, I05-I09.9, I11-I13.9, I20-I25.9, I27.1, I28-I28.8, I30-I31.1, I31.8-I41.9, I42.1-I42.8, I43-I43.9, I47-I48.9, I51.0-I51.4, I60-I63.9, I65-I66.9, I67.0-I67.3, I67.5-I67.7, I68.0-I68.2, I69.0-I69.3, I70.2-I70.8, I71-I73.9, I77-I89.9, I95.2-I95.3, I97-I98, I98.2, I98.9, J30-J35.9, J37-I47.9, J60-J63.8, J65-J68.9, J70-J70.9, J82, J84-J84.9, J91-J92.9, J95-J95.9, K20-K29.9, K31-K31.8, K35-K38.9, K40-K46.9, K50-K52.9, K55-K62.9, K63.5, K64-K64.9, K66.8, K67, K68-K68.9, K70-K70.9, K71.3-K71.5, K71.7, K72.1-K74.6, K74.9, K75.1-K75.2, K75.4-K76.2, K76.4-K77, K77.8, K80-K83.9, K85-K86.9, K90-K91.9, K92.8, K93.8-K95.8, L00-L05.9, L08-L08.9, L10-L14.0, L51-L51.9, L88-L89.9, L93-L93.2, L97-L98.4, M00-M03.0, M03.2-M03.6, M05-M09.8, M30-M36.8, M40-M43.1, M65-M65.0, M71.0-M71.1, M72.5-M72.6, M80-M82.8, M86.3-M86.4, M87-M87.1, M88-M89.0, M89.5, M89.7-M89.9, N00-N08.8, N10-N12.9, N14-N16.8, N18-N18.9, N20-N23.0, N25-N28.1, N29-N32.0, N32.3-N32.4, N34-N34.3, N36-N36.9, N39-N39.2, N41-N41.9, N44-N44.0, N45-N45.9, N49-N49.9, N60-N60.9, N65-N65.1, N72-N72.0, N75-N77.8, N80-N81.9, N83-N83.9, N84.0-N84.1, N87-N87.9, N99-N99.9, P04.3-P04.4, P70.0-P70.2, P96.0-P96.2, P96.5, Q00-Q07.9, Q10.4-Q18.9, Q20-Q28.9, Q30-Q36, Q37-Q45.9, Q50-Q87.8, Q89-Q89.8, Q90-Q93.9, Q95-Q99.8, R50.2, R73-R73.9, R78.0-R78.5, R95-R95.9, X45-X45.9, X65-X65.9, Y15-Y15.9 | 035-035.9, 036.4, 074.2, 102-103.9, 133-133.6, 135-135.9, 136.6, 140-148.9, 150-158.9, 160-164.9, 170-175.9, 180-183.8, 184.0-184.4, 184.8, 185-186.9, 187.1-187.8, 188-188.9, 189.0-189.8, 190-194.8, 200-208.9, 209.0-209.1, 209.4-209.5, 210.0-210.9, 211.0-211.8, 212.0-212.8, 213-213.9, 217-220.9, 221.0-221.8, 222.0-222.8, 223.0-223.8, 224-228.9, 229.0, 229.8, 230.1-230.8, 231.0-231.2, 232-232.9, 233.0-233.2, 233.4-233.5, 233.7, 234.0-234.8, 235.0, 235.4, 235.6-235.8, 236.0-236.2, 236.4-236.5, 236.7, 237-237.3, 237.5-237.9, 238.0-238.9, 239.2-239.4, 239.6, 240-243.9, 244.0-244.1, 244.3-244.8, 245-246.9, 250-259.9, 270-273.9, 275-276, 277-277.2, 277.4-277.9, 278.0-278.8, 282-284.9, 286-286.5, 286.7-289.7, 290-292.9, 294.1-294.9, 303-303.9, 304.0-304.8, 305-305.9, 307.1, 327.2-327.8, 330-331.2, 331.5-337.9, 340-341.9, 345-345.9, 349, 349.2-349.8, 353.6-353.9, 356-356.9, 357.0-357.7, 358-359.9, 376.0-376.1, 391-391.9, 392.0, 393-398.9, 402-404.9, 410-414.9, 416.1, 417-417.9, 420-423, 423.1-424.9, 425.0-425.3, 425.5, 425.7-425.8, 427-427.3, 427.6-427.8, 429.0, 430-435.9, 437.0-437.2, 437.4-437.8, 440.2, 440.4, 441-443.9, 446-457, 457.1-457.9, 459, 459.1-459.3, 470, 470.9-474.9, 476-476.1, 477-479, 490-504.9, 506-506.9, 508-509, 515, 516-517.8, 518.6-518.7, 518.9, 519.0-519.4, 530-536.1, 536.4, 537-537.6, 537.8, 538-543.9, 550-553.6, 555-558.9, 560-560.3, 560.8-560.9, 562-562.1, 564-564.7, 565-566.9, 569.0-569.7, 571-571.9, 572.2-577.9, 579-583.9, 585-585.9, 588-590.9, 592-593.8, 594-599.6, 599.8, 601-602.9, 604-604.9, 608.2, 610-610.9, 617-618.9, 620-620.9, 621.4-621.9, 622.3-622.7, 629-629.8, 680-689, 694-695.5, 707-707.9, 710-711.9, 714-714.3, 714.8-714.9, 730.1, 732-732.9, 733.0-733.1, 740-749.0, 749.2-758.9, 759.0-759.8, 760.7, 775.0-775.3, 779.4-779.5, 787.1, 788.0, 790.2-790.3, 798-798.0, E850-E854, E860 |

**Appendix Table 3: List of International Classification of Diseases (ICD) codes mapped to the Global Burden of Disease cause list for causes of death**

| Cause                                              | ICD10                                                                                                                                                                                                                                                                                                                                                                                                                                                                                                                                                                                                                                                             | ICD9                                                                                                                                                                                                                                                                                                                                                                                                                                                                                                                                               |
|----------------------------------------------------|-------------------------------------------------------------------------------------------------------------------------------------------------------------------------------------------------------------------------------------------------------------------------------------------------------------------------------------------------------------------------------------------------------------------------------------------------------------------------------------------------------------------------------------------------------------------------------------------------------------------------------------------------------------------|----------------------------------------------------------------------------------------------------------------------------------------------------------------------------------------------------------------------------------------------------------------------------------------------------------------------------------------------------------------------------------------------------------------------------------------------------------------------------------------------------------------------------------------------------|
| Neoplasms                                          | C00-C13.9, C15-C25.9, C30-C34.9, C37-C38.8, C40-C41.9, C43-C45.9, C47-C54.9, C56-C57.8, C58-C58.0, C60-C63.8, C64-C67.9, C68.0-C68.8, C69-C75.8, C81-C86.6, C88-C96.9, D00.1-D00.2, D01.0-D01.3, D02.0-D02.3, D03-D06.9, D07.0-D07.2, D07.4-D07.5, D09.0, D09.2-D09.3, D09.8, D10.0-D10.7, D11-D12.9, D13.0-D13.7, D14.0-D14.3, D15-D16.9, D22-D24.9, D26.0, D27-D27.9, D28.0-D28.1, D28.7, D29.0-D29.8, D30.0-D30.8, D31-D36, D36.1-D36.7, D37.1-D37.5, D38.0-D38.5, D39.1-D39.2, D39.8, D40.0-D40.8, D41.0-D41.8, D42-D43.9, D44.0-D44.8, D45-D47.0, D47.2-D47.9, D48.0-D48.6, D49.2-D49.4, D49.6, K31.7, K62.0-K62.1, K63.5, N60-N60.9, N84.0-N84.1, N87-N87.9 | 140-148.9, 150-158.9, 160-164.9, 170-175.9, 180-183.8, 184.0-184.4, 184.8, 185-186.9, 187.1-187.8, 188-188.9, 189.0-189.8, 190-194.8, 200-208.9, 209.0-209.1, 209.4-209.5, 210.0-210.9, 211.0-211.8, 212.0-212.8, 213-213.9, 217-217.8, 219.0, 220-220.9, 221.0-221.8, 222.0-222.8, 223.0-223.8, 224-228.9, 229.0, 229.8, 230.1-230.8, 231.0-231.2, 232-232.9, 233.0-233.2, 233.4-233.5, 233.7, 234.0-234.8, 235.0, 235.4, 235.6-235.8, 236.1-236.2, 236.4-236.5, 236.7, 237-237.3, 237.5-237.9, 238.0-238.9, 239.2-239.4, 239.6, 569.0, 610-610.9 |
| Lip and oral cavity cancer                         | C00-C08.9, D10.0-D10.5, D11-D11.9                                                                                                                                                                                                                                                                                                                                                                                                                                                                                                                                                                                                                                 | 140-145.9, 210.0-210.6, 235.0                                                                                                                                                                                                                                                                                                                                                                                                                                                                                                                      |
| Nasopharynx cancer                                 | C11-C11.9, D10.6                                                                                                                                                                                                                                                                                                                                                                                                                                                                                                                                                                                                                                                  | 147-147.9, 210.7-210.9                                                                                                                                                                                                                                                                                                                                                                                                                                                                                                                             |
| Other pharynx cancer                               | C09-C10.9, C12-C13.9, D10.7                                                                                                                                                                                                                                                                                                                                                                                                                                                                                                                                                                                                                                       | 146-146.9, 148-148.9                                                                                                                                                                                                                                                                                                                                                                                                                                                                                                                               |
| Esophageal cancer                                  | C15-C15.9, D00.1, D13.0                                                                                                                                                                                                                                                                                                                                                                                                                                                                                                                                                                                                                                           | 150-150.9, 211.0, 230.1                                                                                                                                                                                                                                                                                                                                                                                                                                                                                                                            |
| Stomach cancer                                     | C16-C16.9, D00.2, D13.1, D37.1                                                                                                                                                                                                                                                                                                                                                                                                                                                                                                                                                                                                                                    | 151-151.9, 211.1, 230.2                                                                                                                                                                                                                                                                                                                                                                                                                                                                                                                            |
| Colon and rectum cancer                            | C18-C21.9, D01.0-D01.3, D12-D12.9, D37.3-D37.5                                                                                                                                                                                                                                                                                                                                                                                                                                                                                                                                                                                                                    | 153-154.9, 209.1, 209.5, 211.3-211.4, 230.3-230.6                                                                                                                                                                                                                                                                                                                                                                                                                                                                                                  |
| Liver cancer                                       | C22-C22.9, D13.4                                                                                                                                                                                                                                                                                                                                                                                                                                                                                                                                                                                                                                                  | 155-155.9, 211.5                                                                                                                                                                                                                                                                                                                                                                                                                                                                                                                                   |
| Liver cancer due to hepatitis B                    |                                                                                                                                                                                                                                                                                                                                                                                                                                                                                                                                                                                                                                                                   |                                                                                                                                                                                                                                                                                                                                                                                                                                                                                                                                                    |
| Liver cancer due to hepatitis C                    |                                                                                                                                                                                                                                                                                                                                                                                                                                                                                                                                                                                                                                                                   |                                                                                                                                                                                                                                                                                                                                                                                                                                                                                                                                                    |
| Liver cancer due to alcohol use                    |                                                                                                                                                                                                                                                                                                                                                                                                                                                                                                                                                                                                                                                                   |                                                                                                                                                                                                                                                                                                                                                                                                                                                                                                                                                    |
| Liver cancer due to other causes                   |                                                                                                                                                                                                                                                                                                                                                                                                                                                                                                                                                                                                                                                                   |                                                                                                                                                                                                                                                                                                                                                                                                                                                                                                                                                    |
| Gallbladder and biliary tract cancer               | C23-C24.9, D13.5                                                                                                                                                                                                                                                                                                                                                                                                                                                                                                                                                                                                                                                  | 156-156.9                                                                                                                                                                                                                                                                                                                                                                                                                                                                                                                                          |
| Pancreatic cancer                                  | C25-C25.9, D13.6-D13.7                                                                                                                                                                                                                                                                                                                                                                                                                                                                                                                                                                                                                                            | 157-157.9, 211.6-211.7                                                                                                                                                                                                                                                                                                                                                                                                                                                                                                                             |
| Larynx cancer                                      | C32-C32.9, D02.0, D14.1, D38.0                                                                                                                                                                                                                                                                                                                                                                                                                                                                                                                                                                                                                                    | 161-161.9, 212.1, 231.0, 235.6                                                                                                                                                                                                                                                                                                                                                                                                                                                                                                                     |
| Tracheal, bronchus, and lung cancer                | C33-C34.9, D02.1-D02.3, D14.2-D14.3, D38.1                                                                                                                                                                                                                                                                                                                                                                                                                                                                                                                                                                                                                        | 162-162.9, 212.2-212.3, 231.1-231.2, 235.7                                                                                                                                                                                                                                                                                                                                                                                                                                                                                                         |
| Malignant skin melanoma                            | C43-C43.9, D03-D03.9, D22-D23.9, D48.5                                                                                                                                                                                                                                                                                                                                                                                                                                                                                                                                                                                                                            | 172-172.9                                                                                                                                                                                                                                                                                                                                                                                                                                                                                                                                          |
| Non-melanoma skin cancer                           | C44-C44.9, D04-D04.9, D49.2                                                                                                                                                                                                                                                                                                                                                                                                                                                                                                                                                                                                                                       | 173-173.9, 222.4, 232-232.9, 238.2                                                                                                                                                                                                                                                                                                                                                                                                                                                                                                                 |
| Non-melanoma skin cancer (squamous-cell carcinoma) | C44-C44.9, D04-D04.9, D49.2                                                                                                                                                                                                                                                                                                                                                                                                                                                                                                                                                                                                                                       | 173-173.9, 222.4, 232-232.9, 238.2                                                                                                                                                                                                                                                                                                                                                                                                                                                                                                                 |
| Breast cancer                                      | C50-C50.9, D05-D05.9, D24-D24.9, D48.6, D49.3, N60-N60.9                                                                                                                                                                                                                                                                                                                                                                                                                                                                                                                                                                                                          | 174-175.9, 217-217.8, 233.0, 238.3, 239.3, 610-610.9                                                                                                                                                                                                                                                                                                                                                                                                                                                                                               |
| Cervical cancer                                    | C53-C53.9, D06-D06.9, D26.0                                                                                                                                                                                                                                                                                                                                                                                                                                                                                                                                                                                                                                       | 180-180.9, 219.0, 233.1                                                                                                                                                                                                                                                                                                                                                                                                                                                                                                                            |
| Uterine cancer                                     | C54-C54.9, D07.0-D07.2, N87-N87.9                                                                                                                                                                                                                                                                                                                                                                                                                                                                                                                                                                                                                                 | 182-182.8, 233.2                                                                                                                                                                                                                                                                                                                                                                                                                                                                                                                                   |
| Ovarian cancer                                     | C56-C56.9, D27-D27.9, D39.1                                                                                                                                                                                                                                                                                                                                                                                                                                                                                                                                                                                                                                       | 183-183.0, 220-220.9, 236.2                                                                                                                                                                                                                                                                                                                                                                                                                                                                                                                        |
| Prostate cancer                                    | C61-C61.9, D07.5, D29.1, D40.0                                                                                                                                                                                                                                                                                                                                                                                                                                                                                                                                                                                                                                    | 185-185.9, 222.2, 236.5                                                                                                                                                                                                                                                                                                                                                                                                                                                                                                                            |
| Testicular cancer                                  | C62-C62.9, D29.2-D29.8, D40.1-D40.8                                                                                                                                                                                                                                                                                                                                                                                                                                                                                                                                                                                                                               | 186-186.9, 222.0, 222.3, 236.4                                                                                                                                                                                                                                                                                                                                                                                                                                                                                                                     |
| Kidney cancer                                      | C64-C65.9, D30.0-D30.1, D41.0-D41.1                                                                                                                                                                                                                                                                                                                                                                                                                                                                                                                                                                                                                               | 189.0-189.1, 189.5-189.6, 223.0-223.1                                                                                                                                                                                                                                                                                                                                                                                                                                                                                                              |
| Bladder cancer                                     | C67-C67.9, D09.0, D30.3, D41.4-D41.8, D49.4                                                                                                                                                                                                                                                                                                                                                                                                                                                                                                                                                                                                                       | 188-188.9, 223.3, 233.7, 236.7, 239.4                                                                                                                                                                                                                                                                                                                                                                                                                                                                                                              |
| Brain and nervous system cancer                    | C70-C72.9                                                                                                                                                                                                                                                                                                                                                                                                                                                                                                                                                                                                                                                         | 191-192.9                                                                                                                                                                                                                                                                                                                                                                                                                                                                                                                                          |
| Thyroid cancer                                     | C73-C73.9, D09.3, D09.8, D34-D34.9, D44.0                                                                                                                                                                                                                                                                                                                                                                                                                                                                                                                                                                                                                         | 193-193.9, 226-226.9                                                                                                                                                                                                                                                                                                                                                                                                                                                                                                                               |
| Mesothelioma                                       | C45-C45.9                                                                                                                                                                                                                                                                                                                                                                                                                                                                                                                                                                                                                                                         |                                                                                                                                                                                                                                                                                                                                                                                                                                                                                                                                                    |
| Hodgkin lymphoma                                   | C81-C81.9                                                                                                                                                                                                                                                                                                                                                                                                                                                                                                                                                                                                                                                         | 201-201.9                                                                                                                                                                                                                                                                                                                                                                                                                                                                                                                                          |
| Non-Hodgkin lymphoma                               | C82-C86.6, C96-C96.9                                                                                                                                                                                                                                                                                                                                                                                                                                                                                                                                                                                                                                              | 200-200.9, 202-202.9                                                                                                                                                                                                                                                                                                                                                                                                                                                                                                                               |
| Multiple myeloma                                   | C88-C90.9                                                                                                                                                                                                                                                                                                                                                                                                                                                                                                                                                                                                                                                         | 203-203.9                                                                                                                                                                                                                                                                                                                                                                                                                                                                                                                                          |
| Leukemia                                           | C91-C95.9                                                                                                                                                                                                                                                                                                                                                                                                                                                                                                                                                                                                                                                         | 204-208.9                                                                                                                                                                                                                                                                                                                                                                                                                                                                                                                                          |
| Acute lymphoid leukemia                            | C91.0                                                                                                                                                                                                                                                                                                                                                                                                                                                                                                                                                                                                                                                             | 204.0                                                                                                                                                                                                                                                                                                                                                                                                                                                                                                                                              |
| Chronic lymphoid leukemia                          | C91.1                                                                                                                                                                                                                                                                                                                                                                                                                                                                                                                                                                                                                                                             | 204.1                                                                                                                                                                                                                                                                                                                                                                                                                                                                                                                                              |
| Acute myeloid leukemia                             | C92.0, C92.3-C92.6, C93.0, C94.0, C94.2, C94.4-C94.5                                                                                                                                                                                                                                                                                                                                                                                                                                                                                                                                                                                                              | 205.0, 205.3, 206.0, 207.0                                                                                                                                                                                                                                                                                                                                                                                                                                                                                                                         |
| Chronic myeloid leukemia                           | C92.1                                                                                                                                                                                                                                                                                                                                                                                                                                                                                                                                                                                                                                                             | 205.1, 206.1, 207.1                                                                                                                                                                                                                                                                                                                                                                                                                                                                                                                                |
| Other leukemia                                     | C91.2-C91.9, C92.2, C92.7-C92.9, C93.1-C93.9, C94.1, C94.3, C94.6-C95.9                                                                                                                                                                                                                                                                                                                                                                                                                                                                                                                                                                                           | 204.2-204.9, 205.2, 205.8-205.9, 206.2-207, 207.2-208.9                                                                                                                                                                                                                                                                                                                                                                                                                                                                                            |
| Other neoplasms                                    | C17-C17.9, C30-C31.9, C37-C38.8, C40-C41.9, C47-C44, C51-C52.9, C57-C57.8, C58-C58.0, C60-C60.9, C63-C63.8, C66-C66.9, C68.0-C68.8, C69-C69.9, C74-C75.8, D07.4, D09.2, D13.2-D13.3, D14.0, D15-D16.9, D28.0-D28.1, D28.7, D29.0, D30.2, D30.4-D30.8, D31-D33.9, D35-D36, D36.1-D36.7, D37.2, D38.2-D38.5, D39.2, D39.8, D41.2-D41.3, D42-D43.9, D44.1-D44.8, D45-D47.0, D47.2-D47.9, D48.0-D48.4, D49.6, K31.7, K62.0-K62.1, K63.5, N84.0-N84.1                                                                                                                                                                                                                  | 152-152.9, 158-158.9, 160-160.9, 163-164.9, 170-171.9, 181-181.9, 182.9, 183.2-183.8, 184.0-184.4, 184.8, 187.1-187.8, 189.2-189.4, 189.8, 190-190.9, 194-194.8, 209.0, 209.4, 211.2, 211.8, 212.0, 212.4-212.8, 213-213.9, 221.0-221.8, 222.1, 222.8, 223.2, 223.8, 224-225.9, 227-228.9, 229.0, 229.8, 230.7-230.8, 233.4-233.5, 234.0-234.8, 235.4, 235.8, 236.1, 237-237.3, 237.5-237.9, 238.0-238.1, 238.4-238.9, 239.2, 239.6, 569.0                                                                                                         |
| Cardiovascular diseases                            | B33.2, G45-G46.8, I01-I01.9, I02.0, I05-I09.9, I11-I11.9, I20-I25.9, I28-I28.8, I30-I31.1, I31.8-I41.9, I42.1-I42.8, I43-I43.9, I47-I48.9, I51.0-I51.4, I60-I63.9, I65-I66.9, I67.0-I67.3, I67.5-I67.6, I68.0-I68.2, I69.0-I69.3, I70.2-I70.8, I71-I73.9, I77-I83.9, I86-I89.0, I89.9, I98, K75.1                                                                                                                                                                                                                                                                                                                                                                 | 036.4, 074.2, 391-391.9, 392.0, 393-398.9, 402-402.9, 410-414.9, 417-417.9, 420-423, 423.1-424.9, 425.0-425.3, 425.5, 425.7-425.8, 427-427.3, 427.6-427.8, 429.0, 430-435.9, 437.0-437.2, 437.5-437.8, 440.2, 440.4, 441-443.9, 447-454.9, 456, 456.3-457, 457.1, 457.8-457.9, 459, 459.1-459.3                                                                                                                                                                                                                                                    |

| Appendix Table 3: List of International Classification of Diseases (ICD) codes mapped to the Global Burden of Disease cause list for causes of death |                                                                                                                                                                                                                    |                                                                                                                                                                                                                                            |
|------------------------------------------------------------------------------------------------------------------------------------------------------|--------------------------------------------------------------------------------------------------------------------------------------------------------------------------------------------------------------------|--------------------------------------------------------------------------------------------------------------------------------------------------------------------------------------------------------------------------------------------|
| Cause                                                                                                                                                | ICD10                                                                                                                                                                                                              | ICD9                                                                                                                                                                                                                                       |
| Rheumatic heart disease                                                                                                                              | I01-I01.9, I02.0, I05-I09.9                                                                                                                                                                                        | 391-391.9, 392.0, 393-398.9                                                                                                                                                                                                                |
| Ischemic heart disease                                                                                                                               | I20-I25.9                                                                                                                                                                                                          | 410-414.9                                                                                                                                                                                                                                  |
| Cerebrovascular disease                                                                                                                              | G45-G46.8, I60-I63.9, I65-I66.9, I67.0-I67.3, I67.5-I67.6, I68.1-I68.2, I69.0-I69.3                                                                                                                                | 430-435.9, 437.0-437.2, 437.5-437.8                                                                                                                                                                                                        |
| Ischemic stroke                                                                                                                                      | G45-G46.8, I63-I63.9, I65-I66.9, I67.2-I67.3, I67.5-I67.6, I69.3                                                                                                                                                   | 433-435.9, 437.0-437.1, 437.5-437.8                                                                                                                                                                                                        |
| Hemorrhagic stroke                                                                                                                                   | I60-I62.9, I67.0-I67.1, I68.1-I68.2, I69.0-I69.2                                                                                                                                                                   | 430-432.9, 437.2                                                                                                                                                                                                                           |
| Hypertensive heart disease                                                                                                                           | I11-I11.9                                                                                                                                                                                                          | 402-402.9                                                                                                                                                                                                                                  |
| Cardiomyopathy and myocarditis                                                                                                                       | B33.2, I40-I41.9, I42.1-I42.8, I43-I43.9, I51.4                                                                                                                                                                    | 422-422.9, 425.0-425.3, 425.5, 425.7-425.8, 429.0                                                                                                                                                                                          |
| Myocarditis                                                                                                                                          | B33.2, I40-I41.9, I51.4                                                                                                                                                                                            | 422-422.9                                                                                                                                                                                                                                  |
| Alcoholic cardiomyopathy                                                                                                                             | I42.6                                                                                                                                                                                                              | 425.5                                                                                                                                                                                                                                      |
| Other cardiomyopathy                                                                                                                                 | I42.1-I42.5, I42.7-I42.8, I43-I43.9                                                                                                                                                                                | 425.0-425.3, 425.7-425.8, 429.0                                                                                                                                                                                                            |
| Atrial fibrillation and flutter                                                                                                                      | I48-I48.9                                                                                                                                                                                                          | 427.3                                                                                                                                                                                                                                      |
| Aortic aneurysm                                                                                                                                      | I71-I71.9                                                                                                                                                                                                          | 441-441.9                                                                                                                                                                                                                                  |
| Peripheral artery disease                                                                                                                            | I70.2-I70.8, I73-I73.9                                                                                                                                                                                             | 440.2, 440.4, 443.0-443.9                                                                                                                                                                                                                  |
| Endocarditis                                                                                                                                         | I33-I33.9, I38-I39.9                                                                                                                                                                                               | 421-421.9, 424.9                                                                                                                                                                                                                           |
| Other cardiovascular and circulatory diseases                                                                                                        | I28-I28.8, I30-I31.1, I31.8-I32.8, I34-I37.9, I47-I47.9, I51.0-I51.3, I68.0, I72-I72.9, I77-I83.9, I86-I89.0, I89.9, I98, K75.1                                                                                    | 036.4, 074.2, 417-417.9, 420-420.9, 423, 423.1-424.8, 427-427.2, 427.6-427.8, 442-443, 447-454.9, 456, 456.3-457, 457.1, 457.8-457.9, 459, 459.1-459.3                                                                                     |
| Chronic respiratory diseases                                                                                                                         | D86-D86.2, D86.9, G47.3, J30-J35.9, J37-J47.9, J60-J63.8, J65-J68.9, J70-J70.1, J70.8-J70.9, J82, J84-J84.9, J91-J92.9                                                                                             | 135-135.9, 136.6, 327.2-327.8, 470, 470.9-474.9, 476-476.1, 477-479, 490-504.9, 506-506.9, 508-509, 515, 516-517.8, 518.6, 518.9, 519.1-519.4                                                                                              |
| Chronic obstructive pulmonary disease                                                                                                                | J40-J44.9, J47-J47.9                                                                                                                                                                                               | 490-492.9, 494-494.9, 496-499                                                                                                                                                                                                              |
| Pneumoconiosis                                                                                                                                       | J60-J63.8, J65-J65.0, J92.0                                                                                                                                                                                        | 500-504.9                                                                                                                                                                                                                                  |
| Silicosis                                                                                                                                            | J62-J62.9                                                                                                                                                                                                          | 502-502.9, 503.0, 503.9                                                                                                                                                                                                                    |
| Asbestosis                                                                                                                                           | J61-J61.0, J92.0                                                                                                                                                                                                   | 501                                                                                                                                                                                                                                        |
| Coal workers pneumoconiosis                                                                                                                          | J60-J60.0                                                                                                                                                                                                          | 500-500.9, 501.0-501.9                                                                                                                                                                                                                     |
| Other pneumoconiosis                                                                                                                                 | J63-J63.8, J65-J65.0                                                                                                                                                                                               | 503, 503.1, 504-504.9                                                                                                                                                                                                                      |
| Asthma                                                                                                                                               | J45-J46.9                                                                                                                                                                                                          | 493-493.9                                                                                                                                                                                                                                  |
| Interstitial lung disease and pulmonary sarcoidosis                                                                                                  | D86-D86.2, D86.9, J84-J84.9                                                                                                                                                                                        | 135-135.9, 136.6, 515, 516-516.9                                                                                                                                                                                                           |
| Other chronic respiratory diseases                                                                                                                   | G47.3, J30-J35.9, J37-J39.9, J66-J68.9, J70-J70.1, J70.8-J70.9, J82, J91-J92, J92.9                                                                                                                                | 327.2-327.8, 470, 470.9-474.9, 476-476.1, 477-479, 495-495.9, 506-506.9, 508-509, 517-517.8, 518.6, 518.9, 519.1-519.4                                                                                                                     |
| Cirrhosis and other chronic liver diseases                                                                                                           | B18-B18.9, I85-I85.9, I98.2, K70-K70.9, K71.3-K71.5, K71.7, K72.1-K74.6, K74.9, K75.2, K75.4-K76.2, K76.4-K76.9, K77.8                                                                                             | 456.0-456.2, 571-571.9, 572.2-573.9                                                                                                                                                                                                        |
| Cirrhosis and other chronic liver diseases due to hepatitis B                                                                                        |                                                                                                                                                                                                                    |                                                                                                                                                                                                                                            |
| Cirrhosis and other chronic liver diseases due to hepatitis C                                                                                        |                                                                                                                                                                                                                    |                                                                                                                                                                                                                                            |
| Cirrhosis and other chronic liver diseases due to alcohol use                                                                                        |                                                                                                                                                                                                                    |                                                                                                                                                                                                                                            |
| Cirrhosis and other chronic liver diseases due to other causes                                                                                       |                                                                                                                                                                                                                    |                                                                                                                                                                                                                                            |
| Digestive diseases                                                                                                                                   | I84-I84.9, K20-K29.9, K31-K31.6, K31.8, K35-K38.9, K40-K42.9, K44-K46.9, K50-K52.9, K55-K62, K62.2-K62.6, K62.8-K62.9, K64-K64.9, K66.8, K67, K68-K68.9, K77, K80-K83.9, K85-K86.9, K90-K90.9, K92.8, K93.8, M09.1 | 455-455.9, 530-536.1, 537-537.6, 537.8, 538, 540-543.9, 550-551.1, 551.3-552.1, 552.3-553.6, 555-558.9, 560-560.3, 560.8-560.9, 562-562.1, 564-564.1, 564.5-564.7, 565-566.9, 569.1-569.5, 569.7, 574-577.9, 579-579.2, 579.4-579.9, 787.1 |
| Peptic ulcer disease                                                                                                                                 | K25-K28.9, K31, K31.1-K31.6, K31.8                                                                                                                                                                                 | 531-534.9                                                                                                                                                                                                                                  |
| Gastritis and duodenitis                                                                                                                             | K29-K29.9                                                                                                                                                                                                          | 535-535.9                                                                                                                                                                                                                                  |
| Appendicitis                                                                                                                                         | K35-K37.9, K38.3-K38.9                                                                                                                                                                                             | 540-542.9                                                                                                                                                                                                                                  |
| Paralytic ileus and intestinal obstruction                                                                                                           | K56-K56.9                                                                                                                                                                                                          | 560-560.3, 560.8-560.9                                                                                                                                                                                                                     |
| Inguinal, femoral, and abdominal hernia                                                                                                              | K40-K42.9, K44-K46.9                                                                                                                                                                                               | 550-551.1, 551.3-552.1, 552.3-553.0, 553.6                                                                                                                                                                                                 |
| Inflammatory bowel disease                                                                                                                           | K50-K52.9, M09.1                                                                                                                                                                                                   | 555-556.9, 558-558.9, 569.5                                                                                                                                                                                                                |
| Vascular intestinal disorders                                                                                                                        | K55-K55.9                                                                                                                                                                                                          | 557-557.9                                                                                                                                                                                                                                  |
| Gallbladder and biliary diseases                                                                                                                     | K80-K83.9                                                                                                                                                                                                          | 574-576.9                                                                                                                                                                                                                                  |
| Pancreatitis                                                                                                                                         | K85-K86.9                                                                                                                                                                                                          | 577-577.9, 579.4                                                                                                                                                                                                                           |
| Other digestive diseases                                                                                                                             | I84-I84.9, K20-K24, K31.0, K38-K38.2, K57-K62, K62.2-K62.6, K62.8-K62.9, K64-K64.9, K66.8, K67, K68-K68.9, K77, K90-K90.9, K92.8, K93.8                                                                            | 455-455.9, 530-530.9, 536-536.1, 537-537.6, 537.8, 538, 543-543.9, 553.1-553.3, 562-562.1, 564-564.1, 564.5-564.7, 565-566.9, 569.1-569.4, 569.7, 579-579.2, 579.8-579.9, 787.1                                                            |
| Neurological disorders                                                                                                                               | F00-F03.9, G10-G13.8, G20-G21.0, G21.2-G24, G24.1-G25.0, G25.2-G25.3, G25.5, G25.8-G26.0, G30-G31.1, G31.8-G31.9, G35-G37.9, G40-G41.9, G61-G61.9, G70-G72, G72.2-G73.7, G90-G90.9, G95-G95.9, M33-M33.9           | 290-290.9, 294.1-294.9, 330-331.2, 331.5-337.9, 340-341.9, 345-345.9, 349, 349.2-349.8, 353.6-353.9, 356-356.9, 357.0-357.1, 357.3-357.4, 357.7, 358-359.9, 775.2                                                                          |
| Alzheimer disease and other dementias                                                                                                                | F00-F03.9, G30-G31.1, G31.8-G31.9                                                                                                                                                                                  | 290-290.9, 294.1-294.9, 331-331.2                                                                                                                                                                                                          |



| Appendix Table 3: List of International Classification of Diseases (ICD) codes mapped to the Global Burden of Disease cause list for causes of death |                                                                                                                                                                                                                                                                                                                                                                                                                                                                                                                                                                                                                                                                                                                                                          |                                                                                                                                                                                                                                                                                                                                                                                                                                                                                                      |
|------------------------------------------------------------------------------------------------------------------------------------------------------|----------------------------------------------------------------------------------------------------------------------------------------------------------------------------------------------------------------------------------------------------------------------------------------------------------------------------------------------------------------------------------------------------------------------------------------------------------------------------------------------------------------------------------------------------------------------------------------------------------------------------------------------------------------------------------------------------------------------------------------------------------|------------------------------------------------------------------------------------------------------------------------------------------------------------------------------------------------------------------------------------------------------------------------------------------------------------------------------------------------------------------------------------------------------------------------------------------------------------------------------------------------------|
| Cause                                                                                                                                                | ICD10                                                                                                                                                                                                                                                                                                                                                                                                                                                                                                                                                                                                                                                                                                                                                    | ICD9                                                                                                                                                                                                                                                                                                                                                                                                                                                                                                 |
| Parkinson disease                                                                                                                                    | G20-G21.0, G21.2-G22.0                                                                                                                                                                                                                                                                                                                                                                                                                                                                                                                                                                                                                                                                                                                                   | 332-332.9                                                                                                                                                                                                                                                                                                                                                                                                                                                                                            |
| Epilepsy                                                                                                                                             | G40-G41.9                                                                                                                                                                                                                                                                                                                                                                                                                                                                                                                                                                                                                                                                                                                                                | 345-345.9                                                                                                                                                                                                                                                                                                                                                                                                                                                                                            |
| Multiple sclerosis                                                                                                                                   | G35-G35.9                                                                                                                                                                                                                                                                                                                                                                                                                                                                                                                                                                                                                                                                                                                                                | 340-340.9                                                                                                                                                                                                                                                                                                                                                                                                                                                                                            |
| Motor neuron disease                                                                                                                                 | G12.2-G12.9                                                                                                                                                                                                                                                                                                                                                                                                                                                                                                                                                                                                                                                                                                                                              | 335-335.2, 335.8-335.9                                                                                                                                                                                                                                                                                                                                                                                                                                                                               |
| Other neurological disorders                                                                                                                         | G10-G12.1, G13-G13.8, G23-G24, G24.1-G25.0, G25.2-G25.3, G25.5, G25.8-G26.0, G36-G37.9, G61-G61.9, G70-G72, G72.2-G73.7, G90-G90.9, G95-G95.9, M33-M33.9                                                                                                                                                                                                                                                                                                                                                                                                                                                                                                                                                                                                 | 330-330.9, 331.5-331.9, 333-334.9, 335.3, 336-337.9, 341-341.9, 349, 349.2-349.8, 353.6-353.9, 356-356.9, 357.0-357.1, 357.3-357.4, 357.7, 358-359.9, 775.2                                                                                                                                                                                                                                                                                                                                          |
| Mental and substance use disorders                                                                                                                   | F10-F16.9, F18-F19.9, F24, F50.0-F50.5, G31.2, G72.1, P04.3-P04.4, P96.1, Q86.0, R78.0-R78.5, X45-X45.9, X65-X65.9, Y15-Y15.9                                                                                                                                                                                                                                                                                                                                                                                                                                                                                                                                                                                                                            | 291-292.9, 303-303.9, 304.0-304.8, 305-305.9, 307.1, 357.5, 760.7, 790.3, E850-E854, E860                                                                                                                                                                                                                                                                                                                                                                                                            |
| Alcohol use disorders                                                                                                                                | F10-F10.9, G31.2, G72.1, P04.3, Q86.0, R78.0, X45-X45.9, X65-X65.9, Y15-Y15.9                                                                                                                                                                                                                                                                                                                                                                                                                                                                                                                                                                                                                                                                            | 291-291.9, 303-303.9, 305.0, 357.5, 790.3, E860                                                                                                                                                                                                                                                                                                                                                                                                                                                      |
| Drug use disorders                                                                                                                                   | F11-F16.9, F18-F19.9, P04.4, P96.1, R78.1-R78.5                                                                                                                                                                                                                                                                                                                                                                                                                                                                                                                                                                                                                                                                                                          | 292-292.9, 304.0-304.8, 305, 305.1-305.9, 760.7, E850-E854                                                                                                                                                                                                                                                                                                                                                                                                                                           |
| Opioid use disorders                                                                                                                                 | F11-F11.9, P96.1, R78.1                                                                                                                                                                                                                                                                                                                                                                                                                                                                                                                                                                                                                                                                                                                                  | 304.0, 305.5                                                                                                                                                                                                                                                                                                                                                                                                                                                                                         |
| Cocaine use disorders                                                                                                                                | F14-F14.9, R78.2                                                                                                                                                                                                                                                                                                                                                                                                                                                                                                                                                                                                                                                                                                                                         | 304.2, 305.6                                                                                                                                                                                                                                                                                                                                                                                                                                                                                         |
| Amphetamine use disorders                                                                                                                            | F15-F15.9                                                                                                                                                                                                                                                                                                                                                                                                                                                                                                                                                                                                                                                                                                                                                | 304.4, 305.7                                                                                                                                                                                                                                                                                                                                                                                                                                                                                         |
| Other drug use disorders                                                                                                                             | F13-F13.9, F16-F16.9, F18-F19.9, R78.3-R78.5                                                                                                                                                                                                                                                                                                                                                                                                                                                                                                                                                                                                                                                                                                             | 292-292.9, 304.1, 304.5-304.8, 305, 305.1, 305.3-305.4, 305.8-305.9                                                                                                                                                                                                                                                                                                                                                                                                                                  |
| Eating disorders                                                                                                                                     | F50.0-F50.5                                                                                                                                                                                                                                                                                                                                                                                                                                                                                                                                                                                                                                                                                                                                              | 307.1                                                                                                                                                                                                                                                                                                                                                                                                                                                                                                |
| Anorexia nervosa                                                                                                                                     | F50.0-F50.1                                                                                                                                                                                                                                                                                                                                                                                                                                                                                                                                                                                                                                                                                                                                              | 307.1                                                                                                                                                                                                                                                                                                                                                                                                                                                                                                |
| Bulimia nervosa                                                                                                                                      | F50.2-F50.5                                                                                                                                                                                                                                                                                                                                                                                                                                                                                                                                                                                                                                                                                                                                              |                                                                                                                                                                                                                                                                                                                                                                                                                                                                                                      |
| Diabetes, urogenital, blood, and endocrine diseases                                                                                                  | D25-D26, D26.1-D26.9, D28.2, D52.1, D55-D58.9, D59.0-D59.3, D59.5-D59.6, D60-D61.9, D63.1, D64.0, D64.4, D66-D67, D68.0-D69.8, D70-D75.8, D76-D78.8, D86.8, D89-D89.3, E03-E07.1, E09-E14.9, E15.0, E16.0-E16.9, E20-E34.8, E36-E36.8, E65-E68, E70-E85.2, E88-E89.9, G21.1, G24.0, G25.1, G25.4, G25.6-G25.7, G72.0, G93.7, G97-G97.9, I12-I13.9, I95.2-I95.3, I97-I97.9, I98.9, J70.2-J70.5, J95-J95.9, K43-K43.9, K62.7, K91-K91.9, K94-K95.8, M87.1, N00-N08.8, N10-N12.9, N14-N16.8, N18-N18.9, N20-N23.0, N25-N28.1, N29-N32.0, N32.3-N32.4, N34-N34.3, N36-N36.9, N39-N39.2, N41-N41.9, N44-N44.0, N45-N45.9, N49-N49.9, N65-N65.1, N72-N72.0, N75-N77.8, N80-N81.9, N83-N83.9, N99-N99.9, P70.0-P70.2, P96.2, P96.5, Q61-Q62.8, R50.2, R73-R73.9 | 218-219, 219.1-219.9, 236.0, 240-243.9, 244.0-244.1, 244.3-244.8, 245-246.9, 250-259.9, 270-273.9, 275-276, 277-277.2, 277.4-277.9, 278.0-278.8, 282-284.9, 286-286.5, 286.7-289.7, 357.2, 357.6, 403-404.9, 518.7, 519.0, 536.4, 539-539.9, 551.2, 552.2, 564.2-564.4, 569.6, 579.3, 580-583.9, 585-585.9, 588-590.9, 592-593.8, 594-599.6, 599.8, 601-602.9, 604-604.9, 608.2, 617-618.9, 620-620.9, 621.4-621.9, 622.3-622.7, 629-629.8, 753-753.3, 775.0-775.1, 775.3, 779.4-779.5, 788.0, 790.2 |
| Diabetes mellitus                                                                                                                                    | E10-E10.1, E10.3-E11.1, E11.3-E12.1, E12.3-E13.1, E13.3-E14.1, E14.3-E14.9, P70.0-P70.2, R73-R73.9                                                                                                                                                                                                                                                                                                                                                                                                                                                                                                                                                                                                                                                       | 250-250.3, 250.5-250.9, 357.2, 775.0-775.1, 790.2                                                                                                                                                                                                                                                                                                                                                                                                                                                    |
| Acute glomerulonephritis                                                                                                                             | N00-N01.9                                                                                                                                                                                                                                                                                                                                                                                                                                                                                                                                                                                                                                                                                                                                                | 580-580.9                                                                                                                                                                                                                                                                                                                                                                                                                                                                                            |
| Chronic kidney disease                                                                                                                               | D63.1, E10.2, E11.2, E12.2, E13.2, E14.2, I12-I13.9, N02-N08.8, N15.0, N18-N18.9, Q61-Q62.8                                                                                                                                                                                                                                                                                                                                                                                                                                                                                                                                                                                                                                                              | 250.4, 403-404.9, 581-583.9, 585-585.9, 589-589.9, 753-753.3                                                                                                                                                                                                                                                                                                                                                                                                                                         |
| Chronic kidney disease due to diabetes mellitus                                                                                                      | E10.2, E11.2, E12.2, E13.2, E14.2                                                                                                                                                                                                                                                                                                                                                                                                                                                                                                                                                                                                                                                                                                                        | 250.4                                                                                                                                                                                                                                                                                                                                                                                                                                                                                                |
| Chronic kidney disease due to hypertension                                                                                                           | I12-I13.9                                                                                                                                                                                                                                                                                                                                                                                                                                                                                                                                                                                                                                                                                                                                                | 403-404.9                                                                                                                                                                                                                                                                                                                                                                                                                                                                                            |
| Chronic kidney disease due to glomerulonephritis                                                                                                     | N03-N06.9                                                                                                                                                                                                                                                                                                                                                                                                                                                                                                                                                                                                                                                                                                                                                | 581-583.9                                                                                                                                                                                                                                                                                                                                                                                                                                                                                            |
| Chronic kidney disease due to other causes                                                                                                           | N02-N02.9, N07-N08.8, N15.0, Q61-Q62.8                                                                                                                                                                                                                                                                                                                                                                                                                                                                                                                                                                                                                                                                                                                   | 589-589.9, 753-753.3                                                                                                                                                                                                                                                                                                                                                                                                                                                                                 |
| Urinary diseases and male infertility                                                                                                                | N10-N12.9, N15, N15.1-N16.8, N20-N23.0, N25-N28.1, N29-N32.0, N32.3-N32.4, N34-N34.3, N36-N36.9, N39-N39.2, N41-N41.9, N44-N44.0, N45-N45.9, N49-N49.9                                                                                                                                                                                                                                                                                                                                                                                                                                                                                                                                                                                                   | 588-588.9, 590-590.9, 592-593.8, 594-598.1, 598.8-599.6, 599.8, 601-602.9, 604-604.9, 608.2, 788.0                                                                                                                                                                                                                                                                                                                                                                                                   |
| Interstitial nephritis and urinary tract infections                                                                                                  | N10-N12.9, N15, N15.1-N16.8, N30-N30.9, N34-N34.3, N39.0-N39.2                                                                                                                                                                                                                                                                                                                                                                                                                                                                                                                                                                                                                                                                                           | 590-590.9, 595-595.9, 597-597.9, 599.0                                                                                                                                                                                                                                                                                                                                                                                                                                                               |
| Urolithiasis                                                                                                                                         | N20-N23.0                                                                                                                                                                                                                                                                                                                                                                                                                                                                                                                                                                                                                                                                                                                                                | 592-592.9, 594-594.9, 788.0                                                                                                                                                                                                                                                                                                                                                                                                                                                                          |
| Other urinary diseases                                                                                                                               | N25-N28.1, N29-N29.8, N31-N32.0, N32.3-N32.4, N36-N36.9, N39, N41-N41.9, N44-N44.0, N45-N45.9, N49-N49.9                                                                                                                                                                                                                                                                                                                                                                                                                                                                                                                                                                                                                                                 | 588-588.9, 593-593.8, 596-596.9, 598-598.1, 598.8-599, 599.1-599.6, 599.8, 601-602.9, 604-604.9, 608.2                                                                                                                                                                                                                                                                                                                                                                                               |
| Gynecological diseases                                                                                                                               | D25-D26, D26.1-D26.9, D28.2, E28.2, N72-N72.0, N75-N77.8, N80-N81.9, N83-N83.9                                                                                                                                                                                                                                                                                                                                                                                                                                                                                                                                                                                                                                                                           | 218-219, 219.1-219.9, 236.0, 256.4, 617-618.9, 620-620.9, 621.4-621.9, 622.3-622.7, 629-629.8                                                                                                                                                                                                                                                                                                                                                                                                        |
| Uterine fibroids                                                                                                                                     | D25-D26, D26.1-D26.9, D28.2                                                                                                                                                                                                                                                                                                                                                                                                                                                                                                                                                                                                                                                                                                                              | 218-219, 219.1-219.9, 236.0                                                                                                                                                                                                                                                                                                                                                                                                                                                                          |
| Polycystic ovarian syndrome                                                                                                                          | E28.2                                                                                                                                                                                                                                                                                                                                                                                                                                                                                                                                                                                                                                                                                                                                                    | 256.4                                                                                                                                                                                                                                                                                                                                                                                                                                                                                                |
| Endometriosis                                                                                                                                        | N80-N80.9                                                                                                                                                                                                                                                                                                                                                                                                                                                                                                                                                                                                                                                                                                                                                | 617-617.9                                                                                                                                                                                                                                                                                                                                                                                                                                                                                            |
| Genital prolapse                                                                                                                                     | N81-N81.9                                                                                                                                                                                                                                                                                                                                                                                                                                                                                                                                                                                                                                                                                                                                                | 618-618.9                                                                                                                                                                                                                                                                                                                                                                                                                                                                                            |
| Other gynecological diseases                                                                                                                         | N72-N72.0, N75-N77.8, N83-N83.9                                                                                                                                                                                                                                                                                                                                                                                                                                                                                                                                                                                                                                                                                                                          | 620-620.9, 621.4-621.9, 622.3-622.7, 629-629.8                                                                                                                                                                                                                                                                                                                                                                                                                                                       |
| Hemoglobinopathies and hemolytic anemias                                                                                                             | D55-D58.9, D59.1, D59.3, D59.5, D60-D61.9, D64.0, D64.4                                                                                                                                                                                                                                                                                                                                                                                                                                                                                                                                                                                                                                                                                                  | 282-284.9                                                                                                                                                                                                                                                                                                                                                                                                                                                                                            |
| Thalassemias                                                                                                                                         | D56-D56.9                                                                                                                                                                                                                                                                                                                                                                                                                                                                                                                                                                                                                                                                                                                                                | 282.4                                                                                                                                                                                                                                                                                                                                                                                                                                                                                                |
| Sickle cell disorders                                                                                                                                | D57-D57.2, D57.4-D57.8                                                                                                                                                                                                                                                                                                                                                                                                                                                                                                                                                                                                                                                                                                                                   | 282.6                                                                                                                                                                                                                                                                                                                                                                                                                                                                                                |
| G6PD deficiency                                                                                                                                      | D55-D55.2                                                                                                                                                                                                                                                                                                                                                                                                                                                                                                                                                                                                                                                                                                                                                | 282.2-282.3                                                                                                                                                                                                                                                                                                                                                                                                                                                                                          |
| Other hemoglobinopathies and hemolytic anemias                                                                                                       | D55.3-D55.9, D58-D58.9, D59.1, D59.3, D59.5, D60-D61.9, D64.0, D64.4                                                                                                                                                                                                                                                                                                                                                                                                                                                                                                                                                                                                                                                                                     | 282-282.1, 282.7-284.9                                                                                                                                                                                                                                                                                                                                                                                                                                                                               |

**Appendix Table 3: List of International Classification of Diseases (ICD) codes mapped to the Global Burden of Disease cause list for causes of death**

| Cause                                             | ICD10                                                                                                                                                                                                                                                                                                                                                                                                                              | ICD9                                                                                                                                                                                                                                                               |
|---------------------------------------------------|------------------------------------------------------------------------------------------------------------------------------------------------------------------------------------------------------------------------------------------------------------------------------------------------------------------------------------------------------------------------------------------------------------------------------------|--------------------------------------------------------------------------------------------------------------------------------------------------------------------------------------------------------------------------------------------------------------------|
| Endocrine, metabolic, blood, and immune disorders | D52.1, D59.0, D59.2, D59.6, D66-D67, D68.0-D69.8, D70-D75.8, D76-D78.8, D86.8, D89-D89.3, E03-E07.1, E09-E09.9, E15.0, E16.0-E16.9, E20-E28.1, E28.3-E34.8, E36-E36.8, E65-E68, E70-E85.2, E88-E89.9, G21.1, G24.0, G25.1, G25.4, G25.6-G25.7, G72.0, G93.7, G97-G97.9, I95.2-I95.3, I97-I97.9, I98.9, J70.2-J70.5, J95-J95.9, K43-K43.9, K62.7, K91-K91.9, K94-K95.8, M87.1, N14-N14.4, N65-N65.1, N99-N99.9, P96.2, P96.5, R50.2 | 240-243.9, 244.0-244.1, 244.3-244.8, 245-246.9, 251-256.3, 256.8-259.9, 270-273.9, 275-276, 277-277.2, 277.4-277.9, 278.0-278.8, 286-286.5, 286.7-289.7, 357.6, 518.7, 519.0, 536.4, 539-539.9, 551.2, 552.2, 564.2-564.4, 569.6, 579.3, 598.2, 775.3, 779.4-779.5 |
| Musculoskeletal disorders                         | I27.1, I67.7, L93-L93.2, M00-M03.0, M03.2-M03.6, M05-M09.0, M09.2-M09.8, M30-M32.9, M34-M36.8, M40-M43.1, M65-M65.0, M71.0-M71.1, M80-M82.8, M86.3-M86.4, M87-M87.0, M88-M89.0, M89.5, M89.7-M89.9                                                                                                                                                                                                                                 | 416.1, 437.4, 446-446.9, 695.4-695.5, 710-711.9, 714-714.3, 714.8-714.9, 730.1, 732-732.9, 733.0-733.1                                                                                                                                                             |
| Rheumatoid arthritis                              | M05-M06.9, M08.0-M08.8                                                                                                                                                                                                                                                                                                                                                                                                             | 714-714.3, 714.8-714.9                                                                                                                                                                                                                                             |
| Other musculoskeletal disorders                   | I27.1, I67.7, L93-L93.2, M00-M03.0, M03.2-M03.6, M07-M08, M08.9-M09.0, M09.2-M09.8, M30-M32.9, M34-M36.8, M40-M43.1, M65-M65.0, M71.0-M71.1, M80-M82.8, M86.3-M86.4, M87-M87.0, M88-M89.0, M89.5, M89.7-M89.9                                                                                                                                                                                                                      | 416.1, 437.4, 446-446.9, 695.4-695.5, 710-711.9, 730.1, 732-732.9, 733.0-733.1                                                                                                                                                                                     |
| Other non-communicable diseases                   | A46-A46.0, A66-A67.9, B86, D86.3, H05.0-H05.1, I89.1-I89.8, L00-L05.9, L08-L08.9, L10-L14.0, L51-L51.9, L88-L89.9, L97-L98.4, M72.5-M72.6, P96.0, Q00-Q07.9, Q10.4-Q18.9, Q20-Q28.9, Q30-Q36, Q37-Q45.9, Q50-Q60.6, Q63-Q86, Q86.1-Q87.8, Q89-Q89.8, Q90-Q93.9, Q95-Q99.8, R95-R95.9                                                                                                                                               | 035-035.9, 102-103.9, 133-133.6, 376.0-376.1, 457.2-457.3, 680-689, 694-695.3, 707-707.9, 740-749.0, 749.2-752.9, 753.4-758.9, 759.0-759.8, 798-798.0                                                                                                              |
| Congenital birth defects                          | P96.0, Q00-Q07.9, Q10.4-Q18.9, Q20-Q28.9, Q30-Q36, Q37-Q45.9, Q50-Q60.6, Q63-Q86, Q86.1-Q87.8, Q89-Q89.8, Q90-Q93.9, Q95-Q99.8                                                                                                                                                                                                                                                                                                     | 740-749.0, 749.2-752.9, 753.4-758.9, 759.0-759.8                                                                                                                                                                                                                   |
| Neural tube defects                               | Q00-Q01.9, Q05-Q05.9                                                                                                                                                                                                                                                                                                                                                                                                               | 740-741.9, 742.0                                                                                                                                                                                                                                                   |
| Congenital heart anomalies                        | Q20-Q28.9                                                                                                                                                                                                                                                                                                                                                                                                                          | 745-747.9                                                                                                                                                                                                                                                          |
| Orofacial clefts                                  | Q35-Q36, Q37-Q37.9                                                                                                                                                                                                                                                                                                                                                                                                                 | 749-749.0, 749.2-749.9                                                                                                                                                                                                                                             |
| Down syndrome                                     | Q90-Q90.9                                                                                                                                                                                                                                                                                                                                                                                                                          | 758.0                                                                                                                                                                                                                                                              |
| Other chromosomal abnormalities                   | Q87-Q87.8, Q91-Q93.9, Q95-Q95.9, Q97-Q97.9, Q99-Q99.8                                                                                                                                                                                                                                                                                                                                                                              | 758, 758.1-758.6, 758.8-758.9                                                                                                                                                                                                                                      |
| Congenital musculoskeletal and limb anomalies     | Q65-Q79, Q79.6-Q79.9                                                                                                                                                                                                                                                                                                                                                                                                               | 742.5, 754-756.5, 756.8-756.9                                                                                                                                                                                                                                      |
| Urogenital congenital anomalies                   | P96.0, Q50-Q56.4, Q60-Q60.6, Q63-Q64.9                                                                                                                                                                                                                                                                                                                                                                                             | 752-752.9, 753.4-753.9                                                                                                                                                                                                                                             |
| Digestive congenital anomalies                    | Q38-Q45.9, Q79.0-Q79.5                                                                                                                                                                                                                                                                                                                                                                                                             | 750-751.9, 756.6-756.7                                                                                                                                                                                                                                             |
| Other congenital birth defects                    | Q02-Q04.9, Q06-Q07.9, Q10.4-Q18.9, Q30-Q34.9, Q57, Q80-Q86, Q86.1-Q86.8, Q89-Q89.8                                                                                                                                                                                                                                                                                                                                                 | 742, 742.1-742.4, 742.8-744.9, 748-748.9, 757-757.9, 759.0-759.8                                                                                                                                                                                                   |
| Skin and subcutaneous diseases                    | A46-A46.0, A66-A67.9, B86, D86.3, I89.1-I89.8, L00-L05.9, L08-L08.9, L10-L14.0, L51-L51.9, L88-L89.9, L97-L98.4, M72.5-M72.6                                                                                                                                                                                                                                                                                                       | 035-035.9, 102-103.9, 133-133.6, 457.2-457.3, 680-689, 694-695.3, 707-707.9                                                                                                                                                                                        |
| Cellulitis                                        | L03-L03.9, M72.5-M72.6                                                                                                                                                                                                                                                                                                                                                                                                             | 681-682.9                                                                                                                                                                                                                                                          |
| Pyoderma                                          | A46-A46.0, A66-A67.9, I89.1-I89.8, L00-L02.9, L04-L05.9, L08-L08.9, L88, L97-L98.4                                                                                                                                                                                                                                                                                                                                                 | 035-035.9, 102-103.9, 457.2-457.3, 680-680.9, 683-689                                                                                                                                                                                                              |
| Decubitus ulcer                                   | L89-L89.9                                                                                                                                                                                                                                                                                                                                                                                                                          | 707-707.9                                                                                                                                                                                                                                                          |
| Other skin and subcutaneous diseases              | D86.3, L10-L14.0, L51-L51.9                                                                                                                                                                                                                                                                                                                                                                                                        | 694-695.3                                                                                                                                                                                                                                                          |
| Sudden infant death syndrome                      | R95-R95.9                                                                                                                                                                                                                                                                                                                                                                                                                          | 798-798.0                                                                                                                                                                                                                                                          |
| Injuries                                          | L55-L55.9, L56.3, L56.8-L56.9, L58-L58.9, U00-U03, V00-V86.9, V87.2-V87.3, V88.2-V88.3, V90-V98.8, W00-W46.2, W49-W62.9, W64-W70.9, W73-W75.9, W77-W81.9, W83-W94.9, W97.9, W99-X06.9, X08-X39.9, X46-X47, X47.1-X47.8, X48-X48.9, X50-X54.9, X57-X58.9, X60-X64.9, X66-Y08.9, Y35-Y84.9, Y87.0-Y87.1, Y88-Y88.3, Y89.0-Y89.1                                                                                                      | 349.0-349.1, 457.0, E800-E807, E830-E838, E840-E849, E856-E857, E861-E869, E870-E876, E878-E879, E880-E886, E888-E928, E930-E979, E990-E999                                                                                                                        |
| Transport injuries                                | V00-V86.9, V87.2-V87.3, V88.2-V88.3, V90-V98.8                                                                                                                                                                                                                                                                                                                                                                                     | E800-E807, E830-E838, E840-E849                                                                                                                                                                                                                                    |
| Road injuries                                     | V01-V04.9, V06-V80.9, V82-V82.9, V87.2-V87.3                                                                                                                                                                                                                                                                                                                                                                                       |                                                                                                                                                                                                                                                                    |
| Pedestrian road injuries                          | V01-V04.9, V06-V09.9                                                                                                                                                                                                                                                                                                                                                                                                               |                                                                                                                                                                                                                                                                    |
| Cyclist road injuries                             | V10-V19.9                                                                                                                                                                                                                                                                                                                                                                                                                          |                                                                                                                                                                                                                                                                    |
| Motocyclist road injuries                         | V20-V29.9                                                                                                                                                                                                                                                                                                                                                                                                                          |                                                                                                                                                                                                                                                                    |
| Motor vehicle road injuries                       | V30-V79.9, V87.2-V87.3                                                                                                                                                                                                                                                                                                                                                                                                             |                                                                                                                                                                                                                                                                    |
| Other road injuries                               | V80-V80.9, V82-V82.9                                                                                                                                                                                                                                                                                                                                                                                                               |                                                                                                                                                                                                                                                                    |
| Other transport injuries                          | V00-V00.8, V05-V05.9, V81-V81.9, V83-V86.9, V88.2-V88.3, V90-V98.8                                                                                                                                                                                                                                                                                                                                                                 | E800-E807, E830-E838, E840-E849                                                                                                                                                                                                                                    |
| Unintentional injuries                            | L55-L55.9, L56.3, L56.8-L56.9, L58-L58.9, W00-W46.2, W49-W62.9, W64-W70.9, W73-W75.9, W77-W81.9, W83-W94.9, W97.9, W99-X06.9, X08-X32.9, X39-X39.9, X46-X47, X47.1-X47.8, X48-X48.9, X50-X54.9, X57-X58.9, Y40-Y84.9, Y88-Y88.3                                                                                                                                                                                                    | 349.0-349.1, 457.0, E856-E857, E861-E869, E870-E876, E878-E879, E880-E886, E888-E906, E910-E928, E930-E949                                                                                                                                                         |
| Falls                                             | W00-W19.9                                                                                                                                                                                                                                                                                                                                                                                                                          | E880-E886, E888                                                                                                                                                                                                                                                    |
| Drowning                                          | W65-W70.9, W73-W74.9                                                                                                                                                                                                                                                                                                                                                                                                               | E910                                                                                                                                                                                                                                                               |
| Fire, heat, and hot substances                    | X00-X06.9, X08-X19.9                                                                                                                                                                                                                                                                                                                                                                                                               | E890-E899, E924                                                                                                                                                                                                                                                    |
| Poisonings                                        | X46-X47, X47.1-X47.8, X48-X48.9                                                                                                                                                                                                                                                                                                                                                                                                    | E856-E857, E861-E869                                                                                                                                                                                                                                               |
| Exposure to mechanical forces                     | W20-W38.9, W40-W43.9, W45.0-W45.2, W46-W46.2, W49-W52, W75-W75.9                                                                                                                                                                                                                                                                                                                                                                   | E913, E916-E922                                                                                                                                                                                                                                                    |
| Unintentional firearm injuries                    | W32-W34.9                                                                                                                                                                                                                                                                                                                                                                                                                          | E922                                                                                                                                                                                                                                                               |
| Unintentional suffocation                         | W75-W75.9                                                                                                                                                                                                                                                                                                                                                                                                                          | E913                                                                                                                                                                                                                                                               |
| Other exposure to mechanical forces               | W20-W31.9, W35-W38.9, W40-W43.9, W45.0-W45.2, W46-W46.2, W49-W52                                                                                                                                                                                                                                                                                                                                                                   | E916-E921                                                                                                                                                                                                                                                          |

| Appendix Table 3: List of International Classification of Diseases (ICD) codes mapped to the Global Burden of Disease cause list for causes of death |                                                                                                                                                                                                                                                                                                                                                                                                                                                                                                                                                                                                                                                                                                                                                                                                                                                                                                                                                                                                                                                                                                                                                                                                                                                                                                                                                                                                                                                                                                                                                                                |                                                                                                                                                                                                                                                                                                                                                                                                                                                                                                                                                                                                                                                                                                                                                                                                                                                                                                                                                                                                                                                                                                                                                                         |
|------------------------------------------------------------------------------------------------------------------------------------------------------|--------------------------------------------------------------------------------------------------------------------------------------------------------------------------------------------------------------------------------------------------------------------------------------------------------------------------------------------------------------------------------------------------------------------------------------------------------------------------------------------------------------------------------------------------------------------------------------------------------------------------------------------------------------------------------------------------------------------------------------------------------------------------------------------------------------------------------------------------------------------------------------------------------------------------------------------------------------------------------------------------------------------------------------------------------------------------------------------------------------------------------------------------------------------------------------------------------------------------------------------------------------------------------------------------------------------------------------------------------------------------------------------------------------------------------------------------------------------------------------------------------------------------------------------------------------------------------|-------------------------------------------------------------------------------------------------------------------------------------------------------------------------------------------------------------------------------------------------------------------------------------------------------------------------------------------------------------------------------------------------------------------------------------------------------------------------------------------------------------------------------------------------------------------------------------------------------------------------------------------------------------------------------------------------------------------------------------------------------------------------------------------------------------------------------------------------------------------------------------------------------------------------------------------------------------------------------------------------------------------------------------------------------------------------------------------------------------------------------------------------------------------------|
| Cause                                                                                                                                                | ICD10                                                                                                                                                                                                                                                                                                                                                                                                                                                                                                                                                                                                                                                                                                                                                                                                                                                                                                                                                                                                                                                                                                                                                                                                                                                                                                                                                                                                                                                                                                                                                                          | ICD9                                                                                                                                                                                                                                                                                                                                                                                                                                                                                                                                                                                                                                                                                                                                                                                                                                                                                                                                                                                                                                                                                                                                                                    |
| Adverse effects of medical treatment                                                                                                                 | Y40-Y84.9, Y88-Y88.3                                                                                                                                                                                                                                                                                                                                                                                                                                                                                                                                                                                                                                                                                                                                                                                                                                                                                                                                                                                                                                                                                                                                                                                                                                                                                                                                                                                                                                                                                                                                                           | 349.0-349.1, 457.0, E870-E876, E878-E879, E930-E949                                                                                                                                                                                                                                                                                                                                                                                                                                                                                                                                                                                                                                                                                                                                                                                                                                                                                                                                                                                                                                                                                                                     |
| Animal contact                                                                                                                                       | W52.0-W62.9, W64-W64.9, X20-X29.9                                                                                                                                                                                                                                                                                                                                                                                                                                                                                                                                                                                                                                                                                                                                                                                                                                                                                                                                                                                                                                                                                                                                                                                                                                                                                                                                                                                                                                                                                                                                              | E905-E906                                                                                                                                                                                                                                                                                                                                                                                                                                                                                                                                                                                                                                                                                                                                                                                                                                                                                                                                                                                                                                                                                                                                                               |
| Venomous animal contact                                                                                                                              | X20-X29.9                                                                                                                                                                                                                                                                                                                                                                                                                                                                                                                                                                                                                                                                                                                                                                                                                                                                                                                                                                                                                                                                                                                                                                                                                                                                                                                                                                                                                                                                                                                                                                      | E905                                                                                                                                                                                                                                                                                                                                                                                                                                                                                                                                                                                                                                                                                                                                                                                                                                                                                                                                                                                                                                                                                                                                                                    |
| Non-venomous animal contact                                                                                                                          | W52.0-W62.9, W64-W64.9                                                                                                                                                                                                                                                                                                                                                                                                                                                                                                                                                                                                                                                                                                                                                                                                                                                                                                                                                                                                                                                                                                                                                                                                                                                                                                                                                                                                                                                                                                                                                         | E906                                                                                                                                                                                                                                                                                                                                                                                                                                                                                                                                                                                                                                                                                                                                                                                                                                                                                                                                                                                                                                                                                                                                                                    |
| Foreign body                                                                                                                                         | W44-W45, W45.3-W45.9, W78-W80.9, W83-W84.9                                                                                                                                                                                                                                                                                                                                                                                                                                                                                                                                                                                                                                                                                                                                                                                                                                                                                                                                                                                                                                                                                                                                                                                                                                                                                                                                                                                                                                                                                                                                     | E911-E912, E914-E915                                                                                                                                                                                                                                                                                                                                                                                                                                                                                                                                                                                                                                                                                                                                                                                                                                                                                                                                                                                                                                                                                                                                                    |
| Pulmonary aspiration and foreign body in airway                                                                                                      | W78-W80.9, W83-W84.9                                                                                                                                                                                                                                                                                                                                                                                                                                                                                                                                                                                                                                                                                                                                                                                                                                                                                                                                                                                                                                                                                                                                                                                                                                                                                                                                                                                                                                                                                                                                                           | E911-E912                                                                                                                                                                                                                                                                                                                                                                                                                                                                                                                                                                                                                                                                                                                                                                                                                                                                                                                                                                                                                                                                                                                                                               |
| Foreign body in other body part                                                                                                                      | W44-W45, W45.3-W45.9                                                                                                                                                                                                                                                                                                                                                                                                                                                                                                                                                                                                                                                                                                                                                                                                                                                                                                                                                                                                                                                                                                                                                                                                                                                                                                                                                                                                                                                                                                                                                           | E914-E915                                                                                                                                                                                                                                                                                                                                                                                                                                                                                                                                                                                                                                                                                                                                                                                                                                                                                                                                                                                                                                                                                                                                                               |
| Environmental heat and cold exposure                                                                                                                 | L55-L55.9, L56.3, L56.8-L56.9, L58-L58.9, W88-W94.9, W97.9, W99-W99.9, X30-X32.9, X39-X39.9                                                                                                                                                                                                                                                                                                                                                                                                                                                                                                                                                                                                                                                                                                                                                                                                                                                                                                                                                                                                                                                                                                                                                                                                                                                                                                                                                                                                                                                                                    | E900-E902, E926                                                                                                                                                                                                                                                                                                                                                                                                                                                                                                                                                                                                                                                                                                                                                                                                                                                                                                                                                                                                                                                                                                                                                         |
| Other unintentional injuries                                                                                                                         | W39-W39.9, W77-W77.9, W81-W81.9, W85-W87.9, X50-X54.9, X57-X58.9                                                                                                                                                                                                                                                                                                                                                                                                                                                                                                                                                                                                                                                                                                                                                                                                                                                                                                                                                                                                                                                                                                                                                                                                                                                                                                                                                                                                                                                                                                               | E903-E904, E923, E925, E927-E928                                                                                                                                                                                                                                                                                                                                                                                                                                                                                                                                                                                                                                                                                                                                                                                                                                                                                                                                                                                                                                                                                                                                        |
| Self-harm and interpersonal violence                                                                                                                 | X60-X64.9, X66-Y08.9, Y87.0-Y87.1                                                                                                                                                                                                                                                                                                                                                                                                                                                                                                                                                                                                                                                                                                                                                                                                                                                                                                                                                                                                                                                                                                                                                                                                                                                                                                                                                                                                                                                                                                                                              | E950-E969                                                                                                                                                                                                                                                                                                                                                                                                                                                                                                                                                                                                                                                                                                                                                                                                                                                                                                                                                                                                                                                                                                                                                               |
| Self-harm                                                                                                                                            | X60-X64.9, X66-X84.9, Y87.0                                                                                                                                                                                                                                                                                                                                                                                                                                                                                                                                                                                                                                                                                                                                                                                                                                                                                                                                                                                                                                                                                                                                                                                                                                                                                                                                                                                                                                                                                                                                                    | E950-E959                                                                                                                                                                                                                                                                                                                                                                                                                                                                                                                                                                                                                                                                                                                                                                                                                                                                                                                                                                                                                                                                                                                                                               |
| Self-harm by firearm                                                                                                                                 | X72-X74.9                                                                                                                                                                                                                                                                                                                                                                                                                                                                                                                                                                                                                                                                                                                                                                                                                                                                                                                                                                                                                                                                                                                                                                                                                                                                                                                                                                                                                                                                                                                                                                      | E955                                                                                                                                                                                                                                                                                                                                                                                                                                                                                                                                                                                                                                                                                                                                                                                                                                                                                                                                                                                                                                                                                                                                                                    |
| Self-harm by other specified means                                                                                                                   | X60-X64.9, X66-X71.9, X75-X84.9, Y87.0                                                                                                                                                                                                                                                                                                                                                                                                                                                                                                                                                                                                                                                                                                                                                                                                                                                                                                                                                                                                                                                                                                                                                                                                                                                                                                                                                                                                                                                                                                                                         | E950-E954, E956-E959                                                                                                                                                                                                                                                                                                                                                                                                                                                                                                                                                                                                                                                                                                                                                                                                                                                                                                                                                                                                                                                                                                                                                    |
| Interpersonal violence                                                                                                                               | X85-Y08.9, Y87.1                                                                                                                                                                                                                                                                                                                                                                                                                                                                                                                                                                                                                                                                                                                                                                                                                                                                                                                                                                                                                                                                                                                                                                                                                                                                                                                                                                                                                                                                                                                                                               | E960-E969                                                                                                                                                                                                                                                                                                                                                                                                                                                                                                                                                                                                                                                                                                                                                                                                                                                                                                                                                                                                                                                                                                                                                               |
| Physical violence by firearm                                                                                                                         | X93-X95.9                                                                                                                                                                                                                                                                                                                                                                                                                                                                                                                                                                                                                                                                                                                                                                                                                                                                                                                                                                                                                                                                                                                                                                                                                                                                                                                                                                                                                                                                                                                                                                      | E965                                                                                                                                                                                                                                                                                                                                                                                                                                                                                                                                                                                                                                                                                                                                                                                                                                                                                                                                                                                                                                                                                                                                                                    |
| Physical violence by sharp object                                                                                                                    | X99-X99.9                                                                                                                                                                                                                                                                                                                                                                                                                                                                                                                                                                                                                                                                                                                                                                                                                                                                                                                                                                                                                                                                                                                                                                                                                                                                                                                                                                                                                                                                                                                                                                      | E966                                                                                                                                                                                                                                                                                                                                                                                                                                                                                                                                                                                                                                                                                                                                                                                                                                                                                                                                                                                                                                                                                                                                                                    |
| Physical violence by other means                                                                                                                     | X85-X92.9, X96-X98.9, Y00-Y04.9, Y06-Y08.9, Y87.1                                                                                                                                                                                                                                                                                                                                                                                                                                                                                                                                                                                                                                                                                                                                                                                                                                                                                                                                                                                                                                                                                                                                                                                                                                                                                                                                                                                                                                                                                                                              | E961-E964, E967-E969                                                                                                                                                                                                                                                                                                                                                                                                                                                                                                                                                                                                                                                                                                                                                                                                                                                                                                                                                                                                                                                                                                                                                    |
| Forces of nature, conflict and terrorism, and executions and police conflict                                                                         | U00-U03, X33-X38.9, Y35-Y38.9, Y89.0-Y89.1                                                                                                                                                                                                                                                                                                                                                                                                                                                                                                                                                                                                                                                                                                                                                                                                                                                                                                                                                                                                                                                                                                                                                                                                                                                                                                                                                                                                                                                                                                                                     | E907-E909, E970-E979, E990-E999                                                                                                                                                                                                                                                                                                                                                                                                                                                                                                                                                                                                                                                                                                                                                                                                                                                                                                                                                                                                                                                                                                                                         |
| Exposure to forces of nature                                                                                                                         | X33-X38.9                                                                                                                                                                                                                                                                                                                                                                                                                                                                                                                                                                                                                                                                                                                                                                                                                                                                                                                                                                                                                                                                                                                                                                                                                                                                                                                                                                                                                                                                                                                                                                      | E907-E909                                                                                                                                                                                                                                                                                                                                                                                                                                                                                                                                                                                                                                                                                                                                                                                                                                                                                                                                                                                                                                                                                                                                                               |
| Conflict and terrorism                                                                                                                               | U00-U03, Y36-Y38.9, Y89.1                                                                                                                                                                                                                                                                                                                                                                                                                                                                                                                                                                                                                                                                                                                                                                                                                                                                                                                                                                                                                                                                                                                                                                                                                                                                                                                                                                                                                                                                                                                                                      | E979, E990-E999                                                                                                                                                                                                                                                                                                                                                                                                                                                                                                                                                                                                                                                                                                                                                                                                                                                                                                                                                                                                                                                                                                                                                         |
| Executions and police conflict                                                                                                                       | Y35-Y35.9, Y89.0                                                                                                                                                                                                                                                                                                                                                                                                                                                                                                                                                                                                                                                                                                                                                                                                                                                                                                                                                                                                                                                                                                                                                                                                                                                                                                                                                                                                                                                                                                                                                               | E970-E978                                                                                                                                                                                                                                                                                                                                                                                                                                                                                                                                                                                                                                                                                                                                                                                                                                                                                                                                                                                                                                                                                                                                                               |
| Still Born                                                                                                                                           | P95-P95.9                                                                                                                                                                                                                                                                                                                                                                                                                                                                                                                                                                                                                                                                                                                                                                                                                                                                                                                                                                                                                                                                                                                                                                                                                                                                                                                                                                                                                                                                                                                                                                      | 768.0-768.1                                                                                                                                                                                                                                                                                                                                                                                                                                                                                                                                                                                                                                                                                                                                                                                                                                                                                                                                                                                                                                                                                                                                                             |
| Garbage Code (GBD Level 1)                                                                                                                           | A40-A41.9, A48.0, A48.3, A49.0, A59-A59.9, A71-A71.9, A74.0, B07-B07.9, B30-B30.9, B35-B36.9, B85-B85.4, B87-B88.9, B94.0, D50-D50.0, D50.9, D62-D63.0, D63.8-D64, D64.1-D64.2, D64.8-D65.9, D68, D69.9, E15, E16, E50-E50.9, E64.1, E85.3-E87.6, E87.8-E87.9, F06.2-F06.4, F07.2, F09-F09.9, F17-F17.9, F20-F23.9, F25-F49, F51-F99.0, G06-G08.0, G32-G32.8, G43-G44.2, G44.4-G44.8, G47-G47.2, G47.4-G47.9, G50-G60.9, G62-G65.2, G80-G83.9, G89-G89.4, G91-G91.2, G91.4-G92.9, G93.1-G93.2, G93.4-G93.6, G99-H05, H05.2-H09.9, H71-H99, I26-I26.9, I31.2-I31.4, I46-I46.9, I50-I50.9, I51.7, I67.4, I76, I95-I95.1, I95.8-I95.9, J69-J69.9, J80-J80.9, J85-J85.3, J86-J86.9, J93-J93.1, J93.8-J93.9, J94.2, J96-J96.9, J98.1-J98.3, K00-K19, K30, K65-K66.1, K66.9, K71-K71.1, K71.8-K72.0, K75.0, L20-L30.9, L40-L50.9, L52-L54.0, L56-L56.2, L56.4-L56.5, L57-L57.9, L59-L68.9, L70-L76.8, L80-L87.9, L90-L92.9, L94-L96, L98.5-L99.8, M04, M10-M12.0, M12.2-M29, M37-M39, M43.2-M49, M49.2-M64, M65.1-M71, M71.2-M72.4, M72.8-M73, M73.8-M79.9, M83-M86.2, M86.5-M86.9, M87.2-M87.9, M89.1-M89.4, M90-M99.9, N17-N17.9, N19-N19.9, N32.1-N32.2, N32.8-N33.8, N35-N35.9, N37-N37.8, N39.3-N39.8, N42-N43.4, N44.1-N44.8, N46-N48.9, N50-N53.9, N61-N64.9, N82-N82.9, N91-N91.5, N95, N95.1-N95.9, N97-N97.9, R02-R02.9, R03.1, R07.0, R08-R09, R09.3, R11-R12.0, R14-R15.9, R19-R19.6, R19.8-R23, R23.1-R30.9, R32-R50.1, R50.8-R57.9, R58.0-R72.9, R74-R78, R78.6-R94.8, R96-R99.9, U05, U07-U81, U90-U99, X40-X44.9, X47.0, X47.9, X49-X49.9, Y10-Y19.9, Z00-Z15.8, Z17 | 038-038.9, 040.0, 041.1, 076-078.2, 110-111.9, 125-125.3, 126-126.9, 127.2-127.9, 131-132.9, 133.8-134.9, 139.1, 139.9, 176-176.9, 247-248, 264-264.9, 274-274.9, 276.0-276.5, 276.7-276.9, 277.3, 280-280.0, 280.9-281, 285-285.9, 286.6, 293, 294-294.0, 295-302.9, 306-307.0, 307.2-307.4, 307.6-319.9, 324-327.1, 328-329, 338-339.1, 339.3-339.8, 342-344.9, 346-347.9, 350-353.5, 354-355.9, 360-376, 376.2-380.9, 384-389.9, 415-415.9, 423.0, 427.5, 427.9-428.9, 429.3, 437.3, 458-458.9, 459.0, 507-507.9, 510-510.9, 512-513.9, 518.0-518.2, 518.5, 520-529.9, 536.3, 536.8-536.9, 537.7, 537.9, 564.8-564.9, 567-568.9, 570-570.9, 572-572.1, 584-584.9, 586-587.9, 600-600.9, 603-603.9, 605-608.1, 608.3-609, 611-612.1, 615-616.9, 619-619.9, 621-621.3, 622-622.2, 622.8-623.6, 623.8-624.5, 624.8-628.9, 629.9, 690-693.9, 695.8-706.9, 708-709.9, 712-713.8, 715-716, 716.2-721.6, 721.8-730.0, 730.2-730.3, 730.7-731.9, 733, 733.2-734.2, 737-738, 738.2-739.9, 780-782.3, 782.6-784.6, 784.9, 785.4-786, 786.6, 786.8, 787, 787.3-788, 788.1-789, 790-790.1, 790.4-796.1, 796.3-797.9, 798.1-799, 799.2-799.9, E855, E858, E980-E982, V01-V08, V10 |
| Garbage Code (GBD Level 2)                                                                                                                           | A14.9, A29, A45-A45.9, A47-A48, A48.8-A49, A49.3-A49.9, A61-A62, A72-A73, A76, A97, B08-B09, B11-B14, B28-B29, B31-B32.4, B34-B34.9, B61-B62, B68-B68.9, B73-B74.2, B76-B76.9, B78-B81.8, B84, B93-B94, B94.8-B94.9, B95.6-B97.3, B97.7-B99.9, D59, D59.4, D59.8-D59.9, G44.3, G91.3, G93.0, G93.3, I10-I10.9, I15-I15.9, I27-I27.0, I27.2-I27.9, I28.9, I70-I70.1, I70.9, I74-I75.8, J81-J81.1, J90-J90.0, J94-J94.1, J94.8-J94.9, K92.0-K92.2, N70-N71.9, N73-N74.0, N74.3-N74.8, R03-R03.0, R04-R06.9, R09.0-R09.2, R09.8-R10.9, R13-R13.9, R16-R18.9, R23.0, R58, S00, W47-W48, W63, W71-W72, W76-W76.9, W82, W95-W97, W98, X07, X55-X56, X59-X59.9, Y20-Y34.9, Y86-Y87, Y87.2, Y89, Y89.9-Y99.9                                                                                                                                                                                                                                                                                                                                                                                                                                                                                                                                                                                                                                                                                                                                                                                                                                                                           | 000-000.9, 041.2-041.9, 067-069, 078.8-078.9, 079.8-079.9, 089-089.9, 105-109.9, 119, 136.8-136.9, 139.8, 279-279.9, 304, 304.9, 307.5, 339.2, 401-401.9, 405-405.9, 416-416.0, 416.2-416.9, 440-440.1, 440.3, 440.8-440.9, 444-445.8, 511-511.9, 514-514.9, 515.0-515.9, 518, 518.3-518.4, 518.8, 536.2, 578-578.9, 599.7, 613-614.9, 714.4, 716.1, 721.7, 735-736.9, 738.0-738.1, 782.4, 784.7-784.8, 786.3, 787.0, 787.2, 789.0-789.9, 796.2, 799.0-799.1, 800-E80, E83, E839, E85, E859, E87, E877, E88, E887, E929, E983-E985, E988-E989                                                                                                                                                                                                                                                                                                                                                                                                                                                                                                                                                                                                                           |

| Appendix Table 3: List of International Classification of Diseases (ICD) codes mapped to the Global Burden of Disease cause list for causes of death |                                                                                                                                                                                                                                                                                                                                                                                                                                                                                                                                                                                                                                                                                                                                                                                                                                                                                                                                                                                                                                                                                                                                                                                                                                                                                                                                                                                                                                                                                                                                                                                                                                                                                 |                                                                                                                                                                                                                                                                                                                                                                                                                                                                                                                                                                                                                                                                                                                                                                                                                                                                                                                                                                                          |
|------------------------------------------------------------------------------------------------------------------------------------------------------|---------------------------------------------------------------------------------------------------------------------------------------------------------------------------------------------------------------------------------------------------------------------------------------------------------------------------------------------------------------------------------------------------------------------------------------------------------------------------------------------------------------------------------------------------------------------------------------------------------------------------------------------------------------------------------------------------------------------------------------------------------------------------------------------------------------------------------------------------------------------------------------------------------------------------------------------------------------------------------------------------------------------------------------------------------------------------------------------------------------------------------------------------------------------------------------------------------------------------------------------------------------------------------------------------------------------------------------------------------------------------------------------------------------------------------------------------------------------------------------------------------------------------------------------------------------------------------------------------------------------------------------------------------------------------------|------------------------------------------------------------------------------------------------------------------------------------------------------------------------------------------------------------------------------------------------------------------------------------------------------------------------------------------------------------------------------------------------------------------------------------------------------------------------------------------------------------------------------------------------------------------------------------------------------------------------------------------------------------------------------------------------------------------------------------------------------------------------------------------------------------------------------------------------------------------------------------------------------------------------------------------------------------------------------------------|
| Cause                                                                                                                                                | ICD10                                                                                                                                                                                                                                                                                                                                                                                                                                                                                                                                                                                                                                                                                                                                                                                                                                                                                                                                                                                                                                                                                                                                                                                                                                                                                                                                                                                                                                                                                                                                                                                                                                                                           | ICD9                                                                                                                                                                                                                                                                                                                                                                                                                                                                                                                                                                                                                                                                                                                                                                                                                                                                                                                                                                                     |
| Garbage Code (GBD Level 3)                                                                                                                           | A01, A31-A31.9, A42-A44.9, A49.2, A64-A64.0, A99-A99.0, B37-B46.9, B49-B49.9, B55.1-B55.2, B58-B59.9, B89, C14-C14.9, C26-C29, C35-C36, C39-C39.9, C42, C46-C46.9, C55-C55.9, C57.9, C59, C63.9, C68, C68.9, C75.9-C80.9, C87, C97-D00.0, D01, D01.4-D02, D02.4-D02.9, D07, D07.3, D07.6-D09, D09.1, D09.7, D09.9-D10, D10.9, D13, D13.9-D14, D14.4, D17-D21.9, D28, D28.9-D29, D29.9-D30, D30.9, D36.0, D36.9-D37.0, D37.6-D38, D38.6-D39.0, D39.7, D39.9-D40, D40.9-D41, D41.9, D44, D44.9, D48, D48.7-D49.1, D49.5, D49.7-D49.9, D54, D75.9, D79-D85, D87-D88, D89.8-D99, E07.8-E08.9, E17-E19, E34.9-E35.8, E37-E39, E47-E49, E62, E69, E87.7, E90-E99.8, F04-F06.1, F06.5-F07.0, F07.8-F08, F50, F50.8-F50.9, G09-G09.9, G15-G19, G27-G29, G33-G34, G38-G39, G42, G48-G49, G66-G69, G74-G79, G84-G88, G93, G93.8-G94.8, G96-G96.9, G98-G98.9, I00.0, I03-I04, I14, I16-I19, I29-I29.9, I44-I45.9, I49-I49.9, I51, I51.6, I51.8-I59, I90-I94, I96-I96.9, I98.4-I98.8, I99-I00.0, J02, J02.8-J03, J03.8-J04, J04.1-J04.3, J05.1-J06.9, J48-I59, J71-J79, J81.9, J83, J85.9, J87-J89, J90.9, J93.6, J97-J98.0, J98.4-J99.8, K31.9-K34, K39, K47-K49, K53-K54, K63-K63.4, K63.8-K63.9, K69, K75, K78-K79, K84, K87-K89, K92, K92.9-K93, K96-K99, L06-L07, L09, L15-L19, L31-L39, L69, L77-L79, N09, N13-N13.9, N24, N28.8-N28.9, N38, N39.9-N40.9, N54-N59, N66-N69, N78-N79, N84, N84.2-N86, N88-N90.9, N92-N94.9, N95.0, O08-O08.9, O17-O19, O27, O37-O39, O49-O59, O78-O79, O93-O95.9, P06, P16-P18, P30-P34.2, P40-P49, P62-P69, P73, P79, P82, P85-P89, P96.9-P99.9, Q08-Q10.3, Q19, Q29, Q36.0-Q36.9, Q46-Q49, Q88, Q89.9, Q94, Q99.9-R01.2, R07, R07.1-R07.9, R31-R31.9 | 002, 031-031.9, 039-039.9, 085, 085.1-085.9, 088.0-088.7, 112-118.9, 130-130.9, 136.3-136.5, 149-149.9, 159-159.9, 165-169, 177-179.9, 183.9-184, 184.5, 184.9, 187, 187.9, 189, 189.9, 194.9-199.9, 209, 209.2-209.3, 209.6-210, 211, 211.9-212, 212.9, 214-216.9, 221, 221.9-222, 222.9-223, 223.9, 229, 229.1, 229.9-230.0, 230.9-231, 231.8-231.9, 233, 233.3, 233.6, 233.9-234, 234.9-235, 235.1-235.3, 235.5, 235.9-236, 236.3, 236.6, 236.9, 237.4, 239-239.1, 239.5, 239.7-239.9, 249-249.9, 276.6, 278, 293.0-293.9, 331.3-331.4, 348-348.9, 349.9, 357, 357.8-357.9, 399-400.0, 406-409.4, 418-419.9, 426-426.9, 427.4, 429, 429.2, 429.4-429.9, 459.5-460.9, 462-464, 464.1, 464.3, 464.5, 465-465.9, 505-505.9, 519, 519.8-519.9, 544-549, 553.8-553.9, 559-559.0, 560.4-560.7, 561, 562.2-563, 569, 569.8-569.9, 591-591.9, 593.9, 599.9, 623.7, 624.6, 637-637.9, 639-639.9, 749.1, 759, 759.9, 779.9, 782.5, 785-785.3, 786.0-786.2, 786.4-786.5, 786.7, 786.9, E986-E987 |
| Garbage Code (GBD Level 4)                                                                                                                           | B54-B55, B55.9, B64, B82-B82.9, B83.9, D47.1, G00, G00.9-G02.8, G03.9, I42-I42.0, I42.9, I51.5, I64-I64.9, I67, I67.8-I68, I68.8-I69, I69.4-I69.9, J07-J08, J15.9, J17-J19.6, J22-J29, J64-J64.9, P23, P23.5-P23.9, P37.3-P37.4, V87-V87.1, V87.4-V88.1, V88.4-V89.9, V99-V99.0, Y09-Y09.9, Y85-Y85.9                                                                                                                                                                                                                                                                                                                                                                                                                                                                                                                                                                                                                                                                                                                                                                                                                                                                                                                                                                                                                                                                                                                                                                                                                                                                                                                                                                           | 084, 084.6, 238, 244, 244.9, 289.8-289.9, 320, 320.9, 425, 425.4, 425.9, 429.1, 436-437, 437.9-439.6, 482.9-483, 484, 484.8-486.9, 770.0, E808-E829                                                                                                                                                                                                                                                                                                                                                                                                                                                                                                                                                                                                                                                                                                                                                                                                                                      |

**Appendix Table 4. Restrictions on age and sex by cause for GBD 2016**

| Cause                                                                         | Minimum Age | Maximum Age | Sex Restrictions |
|-------------------------------------------------------------------------------|-------------|-------------|------------------|
| HIV/AIDS and tuberculosis                                                     | 28 days     |             |                  |
| Tuberculosis                                                                  | 28 days     |             |                  |
| Drug-sensitive tuberculosis                                                   | 28 days     |             |                  |
| Multidrug-resistant tuberculosis without extensive drug resistance            | 28 days     |             |                  |
| Extensively drug-resistant tuberculosis                                       | 28 days     |             |                  |
| HIV/AIDS                                                                      | 28 days     |             |                  |
| Drug-sensitive HIV/AIDS - Tuberculosis                                        | 28 days     |             |                  |
| Multidrug-resistant HIV/AIDS - Tuberculosis without extensive drug resistance | 28 days     |             |                  |
| Extensively drug-resistant HIV/AIDS - Tuberculosis                            | 28 days     |             |                  |
| HIV/AIDS resulting in other diseases                                          | 28 days     |             |                  |
| Diarrhoea, lower respiratory infections, and other common infectious diseases |             |             |                  |
| Diarrhoeal diseases                                                           |             |             |                  |
| Intestinal infectious diseases                                                | 28 days     |             |                  |
| Typhoid fever                                                                 | 28 days     |             |                  |
| Paratyphoid fever                                                             | 28 days     |             |                  |
| Other intestinal infectious diseases                                          | 28 days     |             |                  |
| Lower respiratory infections                                                  |             |             |                  |
| Upper respiratory infections                                                  |             |             |                  |
| Otitis media                                                                  |             |             |                  |
| Meningitis                                                                    |             |             |                  |
| Pneumococcal meningitis                                                       |             |             |                  |
| H influenzae type B meningitis                                                |             |             |                  |
| Meningococcal infection                                                       |             |             |                  |
| Other meningitis                                                              |             |             |                  |
| Encephalitis                                                                  |             |             |                  |
| Diphtheria                                                                    | 28 days     | 59 years    |                  |

**Appendix Table 4. Restrictions on age and sex by cause for GBD 2016**

| Cause                                                  | Minimum Age | Maximum Age | Sex Restrictions |
|--------------------------------------------------------|-------------|-------------|------------------|
| Whooping cough                                         | 28 days     | 59 years    |                  |
| Tetanus                                                |             |             |                  |
| Measles                                                | 28 days     | 59 years    |                  |
| Varicella and herpes zoster                            |             |             |                  |
| Neglected tropical diseases and malaria                |             |             |                  |
| Malaria                                                | 7 days      |             |                  |
| Chagas disease                                         | 28 days     |             |                  |
| Leishmaniasis                                          | 28 days     |             |                  |
| Visceral leishmaniasis                                 | 28 days     |             |                  |
| African trypanosomiasis                                | 1 year      |             |                  |
| Schistosomiasis                                        | 28 days     |             |                  |
| Cysticercosis                                          |             |             |                  |
| Cystic echinococcosis                                  | 1 year      |             |                  |
| Dengue                                                 | 28 days     |             |                  |
| Yellow fever                                           | 7 days      |             |                  |
| Rabies                                                 | 28 days     |             |                  |
| Intestinal nematode infections                         | 28 days     |             |                  |
| Ascariasis                                             | 28 days     |             |                  |
| Ebola                                                  |             |             |                  |
| Zika virus                                             |             |             |                  |
| Other neglected tropical diseases                      |             |             |                  |
| Maternal disorders                                     | 10 years    | 54 years    | Females Only     |
| Maternal haemorrhage                                   | 10 years    | 54 years    | Females Only     |
| Maternal sepsis and other pregnancy related infections | 10 years    | 54 years    | Females Only     |
| Maternal hypertensive disorders                        | 10 years    | 54 years    | Females Only     |
| Maternal obstructed labour and uterine rupture         | 10 years    | 54 years    | Females Only     |

**Appendix Table 4. Restrictions on age and sex by cause for GBD 2016**

| Cause                                                            | Minimum Age | Maximum Age | Sex Restrictions |
|------------------------------------------------------------------|-------------|-------------|------------------|
| Maternal abortion, miscarriage, and ectopic pregnancy            | 10 years    | 54 years    | Females Only     |
| Indirect maternal deaths                                         | 10 years    | 54 years    | Females Only     |
| Late maternal deaths                                             | 10 years    | 54 years    | Females Only     |
| Maternal deaths aggravated by HIV/AIDS                           | 10 years    | 54 years    | Females Only     |
| Other maternal disorders                                         | 10 years    | 54 years    | Females Only     |
| Neonatal disorders                                               |             | 4 years     |                  |
| Neonatal preterm birth complications                             |             | 4 years     |                  |
| Neonatal encephalopathy due to birth asphyxia and trauma         |             | 4 years     |                  |
| Neonatal sepsis and other neonatal infections                    |             | 4 years     |                  |
| Hemolytic disease and other neonatal jaundice                    |             | 4 years     |                  |
| Other neonatal disorders                                         |             | 4 years     |                  |
| Nutritional deficiencies                                         | 28 days     |             |                  |
| Protein-energy malnutrition                                      | 28 days     |             |                  |
| Iodine deficiency                                                | 28 days     |             |                  |
| Iron-deficiency anaemia                                          | 28 days     |             |                  |
| Other nutritional deficiencies                                   | 28 days     |             |                  |
| Other communicable, maternal, neonatal, and nutritional diseases |             |             |                  |
| Sexually transmitted diseases excluding HIV                      |             |             |                  |
| Syphilis                                                         |             |             |                  |
| Chlamydial infection                                             | 10 years    |             |                  |
| Gonococcal infection                                             | 10 years    |             |                  |
| Other sexually transmitted diseases                              | 10 years    |             |                  |
| Hepatitis                                                        | 28 days     |             |                  |
| Acute hepatitis A                                                | 28 days     |             |                  |
| Hepatitis B                                                      | 28 days     |             |                  |
| Hepatitis C                                                      | 5 years     |             |                  |

**Appendix Table 4. Restrictions on age and sex by cause for GBD 2016**

| Cause                                              | Minimum Age | Maximum Age | Sex Restrictions |
|----------------------------------------------------|-------------|-------------|------------------|
| Acute hepatitis E                                  | 1 year      |             |                  |
| Other infectious diseases                          |             |             |                  |
| Neoplasms                                          |             |             |                  |
| Lip and oral cavity cancer                         | 15 years    |             |                  |
| Nasopharynx cancer                                 | 5 years     |             |                  |
| Other pharynx cancer                               | 15 years    |             |                  |
| Oesophageal cancer                                 | 15 years    |             |                  |
| Stomach cancer                                     | 15 years    |             |                  |
| Colon and rectum cancer                            | 15 years    |             |                  |
| Liver cancer                                       | 5 years     |             |                  |
| Liver cancer due to hepatitis B                    | 5 years     |             |                  |
| Liver cancer due to hepatitis C                    | 5 years     |             |                  |
| Liver cancer due to alcohol use                    | 15 years    |             |                  |
| Liver cancer due to other causes                   | 5 years     |             |                  |
| Gallbladder and biliary tract cancer               | 15 years    |             |                  |
| Pancreatic cancer                                  | 15 years    |             |                  |
| Larynx cancer                                      | 15 years    |             |                  |
| Tracheal, bronchus, and lung cancer                | 15 years    |             |                  |
| Malignant skin melanoma                            | 15 years    |             |                  |
| Non-melanoma skin cancer                           | 15 years    |             |                  |
| Non-melanoma skin cancer (squamous-cell carcinoma) | 15 years    |             |                  |
| Breast cancer                                      | 15 years    |             |                  |
| Cervical cancer                                    | 15 years    |             | Females Only     |
| Uterine cancer                                     | 15 years    |             | Females Only     |
| Ovarian cancer                                     | 15 years    |             | Females Only     |
| Prostate cancer                                    | 15 years    |             | Males Only       |



**Appendix Table 4. Restrictions on age and sex by cause for GBD 2016**

| Cause                           | Minimum Age | Maximum Age | Sex Restrictions |
|---------------------------------|-------------|-------------|------------------|
| Testicular cancer               | 15 years    |             | Males Only       |
| Kidney cancer                   |             |             |                  |
| Bladder cancer                  | 15 years    |             |                  |
| Brain and nervous system cancer |             |             |                  |
| Thyroid cancer                  | 10 years    |             |                  |
| Mesothelioma                    | 15 years    |             |                  |
| Hodgkin lymphoma                |             |             |                  |
| Non-Hodgkin's lymphoma          |             |             |                  |
| Multiple myeloma                | 15 years    |             |                  |
| Leukaemia                       |             |             |                  |
| Acute lymphoid leukaemia        |             |             |                  |
| Chronic lymphoid leukaemia      | 15 years    |             |                  |
| Acute myeloid leukaemia         |             |             |                  |
| Chronic myeloid leukaemia       | 15 years    |             |                  |
| Other leukaemia                 |             |             |                  |
| Other neoplasms                 |             |             |                  |
| Cardiovascular diseases         |             |             |                  |
| Rheumatic heart disease         | 1 year      |             |                  |
| Ischaemic heart disease         | 28 days     |             |                  |
| Cerebrovascular disease         |             |             |                  |
| Ischaemic stroke                | 28 days     |             |                  |
| Hemorrhagic stroke              |             |             |                  |
| Hypertensive heart disease      | 28 days     |             |                  |
| Cardiomyopathy and myocarditis  |             |             |                  |
| Myocarditis                     |             |             |                  |
| Alcoholic cardiomyopathy        | 15 years    |             |                  |

**Appendix Table 4. Restrictions on age and sex by cause for GBD 2016**

| Cause                                                          | Minimum Age | Maximum Age | Sex Restrictions |
|----------------------------------------------------------------|-------------|-------------|------------------|
| Other cardiomyopathy                                           |             |             |                  |
| Atrial fibrillation and flutter                                | 30 years    |             |                  |
| Aortic aneurysm                                                | 15 years    |             |                  |
| Peripheral vascular disease                                    | 40 years    |             |                  |
| Endocarditis                                                   |             |             |                  |
| Other cardiovascular and circulatory diseases                  |             |             |                  |
| Chronic respiratory diseases                                   |             |             |                  |
| Chronic obstructive pulmonary disease                          | 28 days     |             |                  |
| Pneumoconiosis                                                 | 15 years    |             |                  |
| Silicosis                                                      | 15 years    |             |                  |
| Asbestosis                                                     | 15 years    |             |                  |
| Coal workers pneumoconiosis                                    | 15 years    |             |                  |
| Other pneumoconiosis                                           | 15 years    |             |                  |
| Asthma                                                         | 1 year      |             |                  |
| Interstitial lung disease and pulmonary sarcoidosis            | 1 year      |             |                  |
| Other chronic respiratory diseases                             |             |             |                  |
| Cirrhosis and other chronic liver diseases                     | 1 year      |             |                  |
| Cirrhosis and other chronic liver diseases due to hepatitis B  | 1 year      |             |                  |
| Cirrhosis and other chronic liver diseases due to hepatitis C  | 1 year      |             |                  |
| Cirrhosis and other chronic liver diseases due to alcohol use  | 15 years    |             |                  |
| Cirrhosis and other chronic liver diseases due to other causes | 1 year      |             |                  |
| Digestive diseases                                             |             |             |                  |
| Peptic ulcer disease                                           | 1 year      |             |                  |
| Gastritis and duodenitis                                       | 1 year      |             |                  |
| Appendicitis                                                   | 1 year      |             |                  |
| Paralytic ileus and intestinal obstruction                     |             |             |                  |

**Appendix Table 4. Restrictions on age and sex by cause for GBD 2016**

| Cause                                               | Minimum Age | Maximum Age | Sex Restrictions |
|-----------------------------------------------------|-------------|-------------|------------------|
| Inguinal, femoral, and abdominal hernia             | 1 year      |             |                  |
| Inflammatory bowel disease                          | 1 year      |             |                  |
| Vascular intestinal disorders                       | 1 year      |             |                  |
| Gallbladder and biliary diseases                    | 1 year      |             |                  |
| Pancreatitis                                        | 1 year      |             |                  |
| Other digestive diseases                            | 1 year      |             |                  |
| Neurological disorders                              | 28 days     |             |                  |
| Alzheimer's disease and other dementias             | 40 years    |             |                  |
| Parkinson's disease                                 | 20 years    |             |                  |
| Epilepsy                                            | 28 days     |             |                  |
| Multiple sclerosis                                  | 20 years    |             |                  |
| Motor neuron disease                                |             |             |                  |
| Other neurological disorders                        | 28 days     |             |                  |
| Mental and substance use disorders                  |             |             |                  |
| Alcohol use disorders                               | 15 years    |             |                  |
| Drug use disorders                                  |             |             |                  |
| Opioid use disorders                                |             |             |                  |
| Cocaine use disorders                               |             |             |                  |
| Amphetamine use disorders                           |             |             |                  |
| Other drug use disorders                            |             |             |                  |
| Eating disorders                                    | 5 years     | 59 years    |                  |
| Anorexia nervosa                                    | 5 years     | 59 years    |                  |
| Bulimia nervosa                                     | 5 years     | 59 years    |                  |
| Diabetes, urogenital, blood, and endocrine diseases |             |             |                  |
| Diabetes mellitus                                   |             |             |                  |
| Acute glomerulonephritis                            | 28 days     |             |                  |

**Appendix Table 4. Restrictions on age and sex by cause for GBD 2016**

| Cause                                               | Minimum Age | Maximum Age | Sex Restrictions |
|-----------------------------------------------------|-------------|-------------|------------------|
| Chronic kidney disease                              | 28 days     |             |                  |
| Chronic kidney disease due to diabetes mellitus     | 28 days     |             |                  |
| Chronic kidney disease due to hypertension          | 28 days     |             |                  |
| Chronic kidney disease due to glomerulonephritis    | 28 days     |             |                  |
| Chronic kidney disease due to other causes          | 28 days     |             |                  |
| Urinary diseases and male infertility               |             |             |                  |
| Interstitial nephritis and urinary tract infections |             |             |                  |
| Urolithiasis                                        | 5 years     |             |                  |
| Other urinary diseases                              |             |             |                  |
| Gynecological diseases                              | 15 years    |             | Females Only     |
| Uterine fibroids                                    | 15 years    |             | Females Only     |
| Polycystic ovarian syndrome                         | 15 years    | 54 years    | Females Only     |
| Endometriosis                                       | 15 years    | 54 years    | Females Only     |
| Genital prolapse                                    | 15 years    |             | Females Only     |
| Other gynecological diseases                        | 15 years    |             | Females Only     |
| Hemoglobinopathies and hemolytic anaemias           |             |             |                  |
| Thalassemas                                         |             |             |                  |
| Sickle cell disorders                               |             |             |                  |
| G6PD deficiency                                     |             |             |                  |
| Other hemoglobinopathies and hemolytic anaemias     |             |             |                  |
| Endocrine, metabolic, blood, and immune disorders   |             |             |                  |
| Musculoskeletal disorders                           | 5 years     |             |                  |
| Rheumatoid arthritis                                | 5 years     |             |                  |
| Other musculoskeletal disorders                     | 5 years     |             |                  |
| Other non-communicable diseases                     |             |             |                  |
| Congenital anomalies                                |             | 69 years    |                  |

**Appendix Table 4. Restrictions on age and sex by cause for GBD 2016**

| Cause                                         | Minimum Age | Maximum Age | Sex Restrictions |
|-----------------------------------------------|-------------|-------------|------------------|
| Neural tube defects                           |             | 69 years    |                  |
| Congenital heart anomalies                    |             | 69 years    |                  |
| Orofacial clefts                              |             | 4 years     |                  |
| Down's syndrome                               |             | 69 years    |                  |
| Other chromosomal abnormalities               |             | 69 years    |                  |
| Congenital musculoskeletal and limb anomalies |             | 69 years    |                  |
| Urogenital congenital anomalies               |             | 69 years    |                  |
| Digestive congenital anomalies                |             | 69 years    |                  |
| Other congenital anomalies                    |             | 69 years    |                  |
| Skin and subcutaneous diseases                | 28 days     |             |                  |
| Cellulitis                                    | 28 days     |             |                  |
| Pyoderma                                      | 28 days     |             |                  |
| Decubitus ulcer                               | 1 year      |             |                  |
| Other skin and subcutaneous diseases          | 28 days     |             |                  |
| Sudden infant death syndrome                  | 7 days      | 364 days    |                  |
| Transport injuries                            |             |             |                  |
| Road injuries                                 |             |             |                  |
| Pedestrian road injuries                      |             |             |                  |
| Cyclist road injuries                         | 1 year      |             |                  |
| Motorcyclist road injuries                    |             |             |                  |
| Motor vehicle road injuries                   |             |             |                  |
| Other road injuries                           |             |             |                  |
| Other transport injuries                      |             |             |                  |
| Unintentional injuries                        |             |             |                  |
| Falls                                         |             |             |                  |
| Drowning                                      |             |             |                  |

**Appendix Table 4. Restrictions on age and sex by cause for GBD 2016**

| Cause                                                                        | Minimum Age | Maximum Age | Sex Restrictions |
|------------------------------------------------------------------------------|-------------|-------------|------------------|
| Fire, heat, and hot substances                                               |             |             |                  |
| Poisonings                                                                   |             |             |                  |
| Exposure to mechanical forces                                                |             |             |                  |
| Unintentional firearm injuries                                               |             |             |                  |
| Unintentional suffocation                                                    |             |             |                  |
| Other exposure to mechanical forces                                          |             |             |                  |
| Adverse effects of medical treatment                                         |             |             |                  |
| Animal contact                                                               |             |             |                  |
| Venomous animal contact                                                      |             |             |                  |
| Non-venomous animal contact                                                  |             |             |                  |
| Foreign body                                                                 |             |             |                  |
| Pulmonary aspiration and foreign body in airway                              |             |             |                  |
| Foreign body in other body part                                              |             |             |                  |
| Environmental heat and cold exposure                                         |             |             |                  |
| Other unintentional injuries                                                 |             |             |                  |
| Self-harm and interpersonal violence                                         |             |             |                  |
| Self-harm                                                                    | 10 years    |             |                  |
| Self-harm by firearm                                                         | 10 years    |             |                  |
| Self-harm by other specified means                                           | 10 years    |             |                  |
| Interpersonal violence                                                       |             |             |                  |
| Assault by firearm                                                           |             |             |                  |
| Assault by sharp object                                                      |             |             |                  |
| Assault by other means                                                       |             |             |                  |
| Forces of nature, conflict and terrorism, and executions and police conflict |             |             |                  |
| Exposure to forces of nature                                                 |             |             |                  |
| Conflict and terrorism                                                       |             |             |                  |

**Appendix Table 4. Restrictions on age and sex by cause for GBD 2016**

| Cause                          | Minimum Age | Maximum Age | Sex Restrictions |
|--------------------------------|-------------|-------------|------------------|
| Executions and police conflict | 28 days     |             |                  |

**Appendix Table 5: HIV/AIDS-related garbage code redistribution packages**

| Package name                | ICD9 codes                                                                                                                                                                                      | ICD10 codes                                                                                                                                                                |
|-----------------------------|-------------------------------------------------------------------------------------------------------------------------------------------------------------------------------------------------|----------------------------------------------------------------------------------------------------------------------------------------------------------------------------|
| Infectious 1                | 39.0, 39.1, 39.2, 39.3, 39.4, 39.6, 39.8, 39.9, 113.0, 113.2, 113.4, 113.5, 113.6                                                                                                               | A42, A42.0, A42.1, A42.2, A42.7, A42.8, A42.81, A42.82, A42.89, A42.9                                                                                                      |
| Infectious 2                | 88.0, 88.2, 88.3, 88.5, 88.7                                                                                                                                                                    | A44, A44.0, A44.1, A44.8, A44.9                                                                                                                                            |
| Infectious 3                | 112.0, 112.1, 112.2, 112.3, 112.4, 112.5, 112.6, 112.8, 112.81, 112.82, 112.83, 112.84, 112.85, 112.89, 112.9                                                                                   | B37, B37.0, B37.1, B37.2, B37.3, B37.4, B37.41, B37.42, B37.49, B37.5, B37.6, B37.7, B37.8, B37.81, B37.82, B37.83, B37.84, B37.89, B37.9                                  |
| Infectious 4                | 114.0, 114.1, 114.2, 114.3, 114.4, 114.5, 114.6, 114.9                                                                                                                                          | B38, B38.0, B38.1, B38.2, B38.3, B38.4, B38.7, B38.8, B38.81, B38.89, B38.9                                                                                                |
| Infectious 5                | 115.0, 115.01, 115.02, 115.03, 115.04, 115.05, 115.09, 115.1, 115.11, 115.12, 115.13, 115.14, 115.15, 115.19, 115.2, 115.3, 115.4, 115.5, 115.9, 115.91, 115.92, 115.93, 115.94, 115.95, 115.99 | B39, B39.0, B39.1, B39.2, B39.3, B39.4, B39.5, B39.9                                                                                                                       |
| Infectious 6                | 116.0, 116.2, 116.3, 116.4, 116.5, 116.6, 116.9                                                                                                                                                 | B40, B40.0, B40.1, B40.2, B40.3, B40.7, B40.8, B40.81, B40.89, B40.9                                                                                                       |
| Infectious 7                | 116.1                                                                                                                                                                                           | B41, B41.0, B41.7, B41.8, B41.9                                                                                                                                            |
| Infectious 8                | 117.1                                                                                                                                                                                           | B42, B42.0, B42.1, B42.7, B42.8, B42.81, B42.82, B42.89, B42.9, B43, B43.0, B43.1, B43.2, B43.8, B43.9                                                                     |
| Infectious 9                | 117.3                                                                                                                                                                                           | B44, B44.0, B44.1, B44.2, B44.7, B44.8, B44.81, B44.89, B44.9                                                                                                              |
| Infectious 10               | 117.7                                                                                                                                                                                           | B46, B46.0, B46.1, B46.2, B46.3, B46.4, B46.5, B46.8, B46.9                                                                                                                |
| Infectious 11               | 130.0, 130.1, 130.2, 130.3, 130.4, 130.5, 130.6, 130.7, 130.8, 130.9                                                                                                                            | B58, B58.0, B58.00, B58.01, B58.09, B58.1, B58.2, B58.3, B58.8, B58.81, B58.82, B58.83, B58.89, B58.9                                                                      |
| Infectious 12               | 136.3, 136.4, 136.5                                                                                                                                                                             | B59, B59.0, B59.9                                                                                                                                                          |
| Infectious 13               | 117.5                                                                                                                                                                                           | B45, B45.0, B45.1, B45.2, B45.3, B45.7, B45.8, B45.9                                                                                                                       |
| Infectious 14               | 117.2                                                                                                                                                                                           | A43, A43.0, A43.1, A43.8, A43.9                                                                                                                                            |
| Infectious 15               | 117.0, 117.4, 117.6, 117.8, 117.9, 118.0, 118.1, 118.2, 118.3, 118.4, 118.5, 118.6, 118.9                                                                                                       | B49, B49.5, B49.9                                                                                                                                                          |
| Infectious 16               | 85.1, 85.2, 85.3, 85.4, 85.5                                                                                                                                                                    | B55.1, B55.2                                                                                                                                                               |
| Infectious 17               | 31.0, 31.1, 31.2, 31.8, 31.9                                                                                                                                                                    | A31, A31.0, A31.1, A31.2, A31.8, A31.9                                                                                                                                     |
| Immunodeficiency - antibody | 279.0, 279.01, 279.02, 279.03, 279.04, 279.05, 279.06, 279.09, 279.1                                                                                                                            | D80, D80.0, D80.1, D80.2, D80.3, D80.4, D80.5, D80.6, D80.7, D80.8, D80.9                                                                                                  |
| Immunodeficiency - WBC      | 279.1, 279.11, 279.12, 279.13, 279.19, 279.2, 279.3, 279.4, 279.41, 279.49                                                                                                                      | D81, D81.0, D81.1, D81.2, D81.3, D81.4, D81.5, D81.6, D81.7, D81.8, D81.81, D81.810, D81.818, D81.819, D81.89, D81.9, D82, D82.0, D82.1, D82.2, D82.3, D82.4, D82.8, D82.9 |
| Immunodeficiency - other    | 279.0, 279.5, 279.51, 279.52, 279.53, 279.6, 279.8, 279.9                                                                                                                                       | D83, D83.0, D83.1, D83.2, D83.8, D83.9, D84, D84.0, D84.1, D84.8, D84.9, D89.8, D89.81, D89.810, D89.811, D89.812, D89.813, D89.82, D89.89, D89.9                          |
| Kaposi's sarcoma            | 176.0, 176.1, 176.2, 176.3, 176.4, 176.5, 176.8, 176.9                                                                                                                                          | C46, C46.0, C46.1, C46.2, C46.3, C46.4, C46.5, C46.50, C46.51, C46.52, C46.7, C46.8, C46.9                                                                                 |



Appendix Table 6: CODEm covariates used and expected direction of covariate by cause

| Cause              | Sex    | Age start   | Age end   | Direction | Covariate                                                          |
|--------------------|--------|-------------|-----------|-----------|--------------------------------------------------------------------|
| Tuberculosis       | Male   | 28-364 days | 95+ years | 1         | Alcohol (liters per capita)                                        |
| Tuberculosis       | Male   | 28-364 days | 95+ years | 1         | Diabetes Fasting Plasma Glucose (mmol/L)                           |
| Tuberculosis       | Male   | 28-364 days | 95+ years | -1        | Education (years per capita)                                       |
| Tuberculosis       | Male   | 28-364 days | 95+ years | -1        | LDI (I\$ per capita)                                               |
| Tuberculosis       | Male   | 28-364 days | 95+ years | 1         | Indoor Air Pollution (All Cooking Fuels)                           |
| Tuberculosis       | Male   | 28-364 days | 95+ years | 1         | Outdoor Air Pollution (PM2.5)                                      |
| Tuberculosis       | Male   | 28-364 days | 95+ years | 1         | Population Density (500-1000 ppl/sqkm, proportion)                 |
| Tuberculosis       | Male   | 28-364 days | 95+ years | 1         | Population Density (over 1000 ppl/sqkm, proportion)                |
| Tuberculosis       | Male   | 28-364 days | 95+ years | 1         | Smoking Prevalence                                                 |
| Tuberculosis       | Male   | 28-364 days | 95+ years | 1         | Log-transformed SEV scalar: TB                                     |
| Tuberculosis       | Male   | 28-364 days | 95+ years | -1        | Socio-demographic Index                                            |
| Tuberculosis       | Male   | 28-364 days | 95+ years | -1        | Healthcare access and quality index                                |
| Tuberculosis       | Male   | 28-364 days | 95+ years | 1         | Age-standardized proportion adult underweight                      |
| Tuberculosis       | Male   | 28-364 days | 95+ years | 1         | Tuberculosis infection risk-weighted prevalence (age-standardized) |
| Tuberculosis       | Male   | 28-364 days | 95+ years | 1         | Tuberculosis prevalence (age-standardized)                         |
| Tuberculosis       | Female | 28-364 days | 95+ years | 1         | Alcohol (liters per capita)                                        |
| Tuberculosis       | Female | 28-364 days | 95+ years | 1         | Diabetes Fasting Plasma Glucose (mmol/L)                           |
| Tuberculosis       | Female | 28-364 days | 95+ years | -1        | Education (years per capita)                                       |
| Tuberculosis       | Female | 28-364 days | 95+ years | -1        | LDI (I\$ per capita)                                               |
| Tuberculosis       | Female | 28-364 days | 95+ years | 1         | Indoor Air Pollution (All Cooking Fuels)                           |
| Tuberculosis       | Female | 28-364 days | 95+ years | 1         | Outdoor Air Pollution (PM2.5)                                      |
| Tuberculosis       | Female | 28-364 days | 95+ years | 1         | Population Density (500-1000 ppl/sqkm, proportion)                 |
| Tuberculosis       | Female | 28-364 days | 95+ years | 1         | Population Density (over 1000 ppl/sqkm, proportion)                |
| Tuberculosis       | Female | 28-364 days | 95+ years | 1         | Smoking Prevalence                                                 |
| Tuberculosis       | Female | 28-364 days | 95+ years | 1         | Log-transformed SEV scalar: TB                                     |
| Tuberculosis       | Female | 28-364 days | 95+ years | -1        | Socio-demographic Index                                            |
| Tuberculosis       | Female | 28-364 days | 95+ years | -1        | Healthcare access and quality index                                |
| Tuberculosis       | Female | 28-364 days | 95+ years | 1         | Age-standardized proportion adult underweight                      |
| Tuberculosis       | Female | 28-364 days | 95+ years | 1         | Tuberculosis infection risk-weighted prevalence (age-standardized) |
| Tuberculosis       | Female | 28-364 days | 95+ years | 1         | Tuberculosis prevalence (age-standardized)                         |
| Diarrheal diseases | Male   | 5-9 years   | 95+ years | -1        | Education (years per capita)                                       |
| Diarrheal diseases | Male   | 5-9 years   | 95+ years | -1        | LDI (I\$ per capita)                                               |
| Diarrheal diseases | Male   | 5-9 years   | 95+ years | -1        | Mean BMI                                                           |
| Diarrheal diseases | Male   | 5-9 years   | 95+ years | 0         | Population Density (over 1000 ppl/sqkm, proportion)                |
| Diarrheal diseases | Male   | 5-9 years   | 95+ years | -1        | Sanitation (proportion with access)                                |
| Diarrheal diseases | Male   | 5-9 years   | 95+ years | -1        | Improved Water Source (proportion with access)                     |
| Diarrheal diseases | Male   | 5-9 years   | 95+ years | 1         | Log-transformed SEV scalar: Diarrhea                               |
| Diarrheal diseases | Male   | 5-9 years   | 95+ years | 1         | SEV unsafe water                                                   |
| Diarrheal diseases | Male   | 5-9 years   | 95+ years | 1         | SEV unsafe sanitation                                              |
| Diarrheal diseases | Male   | 5-9 years   | 95+ years | -1        | Socio-demographic Index                                            |
| Diarrheal diseases | Male   | 5-9 years   | 95+ years | -1        | Rotavirus coverage (proportion)                                    |
| Diarrheal diseases | Male   | 5-9 years   | 95+ years | -1        | Healthcare access and quality index                                |
| Diarrheal diseases | Female | 5-9 years   | 95+ years | -1        | Education (years per capita)                                       |
| Diarrheal diseases | Female | 5-9 years   | 95+ years | -1        | LDI (I\$ per capita)                                               |
| Diarrheal diseases | Female | 5-9 years   | 95+ years | -1        | Mean BMI                                                           |
| Diarrheal diseases | Female | 5-9 years   | 95+ years | 0         | Population Density (over 1000 ppl/sqkm, proportion)                |
| Diarrheal diseases | Female | 5-9 years   | 95+ years | -1        | Sanitation (proportion with access)                                |
| Diarrheal diseases | Female | 5-9 years   | 95+ years | -1        | Improved Water Source (proportion with access)                     |
| Diarrheal diseases | Female | 5-9 years   | 95+ years | 1         | Log-transformed SEV scalar: Diarrhea                               |
| Diarrheal diseases | Female | 5-9 years   | 95+ years | 1         | SEV unsafe water                                                   |
| Diarrheal diseases | Female | 5-9 years   | 95+ years | 1         | SEV unsafe sanitation                                              |
| Diarrheal diseases | Female | 5-9 years   | 95+ years | -1        | Socio-demographic Index                                            |
| Diarrheal diseases | Female | 5-9 years   | 95+ years | -1        | Rotavirus coverage (proportion)                                    |
| Diarrheal diseases | Female | 5-9 years   | 95+ years | -1        | Healthcare access and quality index                                |
| Diarrheal diseases | Male   | 0-6 days    | 1-4 years | -1        | LDI (I\$ per capita)                                               |
| Diarrheal diseases | Male   | 0-6 days    | 1-4 years | 1         | Underweight (proportion <2SD weight for age, <5 years)             |
| Diarrheal diseases | Male   | 0-6 days    | 1-4 years | 0         | Population Density (over 1000 ppl/sqkm, proportion)                |
| Diarrheal diseases | Male   | 0-6 days    | 1-4 years | 0         | Population Density (under 150 ppl/sqkm, proportion)                |
| Diarrheal diseases | Male   | 0-6 days    | 1-4 years | -1        | Sanitation (proportion with access)                                |
| Diarrheal diseases | Male   | 0-6 days    | 1-4 years | -1        | Improved Water Source (proportion with access)                     |
| Diarrheal diseases | Male   | 0-6 days    | 1-4 years | 1         | Vitamin A Deficiency Prevalence (age-standardized)                 |
| Diarrheal diseases | Male   | 0-6 days    | 1-4 years | -1        | Maternal education (years per capita)                              |
| Diarrheal diseases | Male   | 0-6 days    | 1-4 years | 1         | Log-transformed SEV scalar: Diarrhea                               |
| Diarrheal diseases | Male   | 0-6 days    | 1-4 years | 1         | SEV unsafe water                                                   |
| Diarrheal diseases | Male   | 0-6 days    | 1-4 years | 1         | SEV unsafe sanitation                                              |
| Diarrheal diseases | Male   | 0-6 days    | 1-4 years | -1        | Socio-demographic Index                                            |
| Diarrheal diseases | Male   | 0-6 days    | 1-4 years | 1         | Stunting (proportion <2SD height for age, <5 years)                |
| Diarrheal diseases | Male   | 0-6 days    | 1-4 years | 1         | Wasting (proportion <2SD weight for height, <5 years)              |
| Diarrheal diseases | Male   | 0-6 days    | 1-4 years | -1        | Rotavirus coverage (proportion)                                    |
| Diarrheal diseases | Male   | 0-6 days    | 1-4 years | -1        | Healthcare access and quality index                                |
| Diarrheal diseases | Male   | 0-6 days    | 1-4 years | 1         | No handwashing with soap                                           |
| Diarrheal diseases | Male   | 0-6 days    | 1-4 years | 1         | Suboptimal breastfeeding SEV                                       |
| Diarrheal diseases | Male   | 0-6 days    | 1-4 years | 1         | Zinc deficiency                                                    |
| Diarrheal diseases | Female | 0-6 days    | 1-4 years | -1        | LDI (I\$ per capita)                                               |
| Diarrheal diseases | Female | 0-6 days    | 1-4 years | 1         | Underweight (proportion <2SD weight for age, <5 years)             |
| Diarrheal diseases | Female | 0-6 days    | 1-4 years | 0         | Population Density (over 1000 ppl/sqkm, proportion)                |
| Diarrheal diseases | Female | 0-6 days    | 1-4 years | 0         | Population Density (under 150 ppl/sqkm, proportion)                |
| Diarrheal diseases | Female | 0-6 days    | 1-4 years | -1        | Sanitation (proportion with access)                                |
| Diarrheal diseases | Female | 0-6 days    | 1-4 years | -1        | Improved Water Source (proportion with access)                     |
| Diarrheal diseases | Female | 0-6 days    | 1-4 years | 1         | Vitamin A Deficiency Prevalence (age-standardized)                 |
| Diarrheal diseases | Female | 0-6 days    | 1-4 years | -1        | Maternal education (years per capita)                              |
| Diarrheal diseases | Female | 0-6 days    | 1-4 years | 1         | Log-transformed SEV scalar: Diarrhea                               |
| Diarrheal diseases | Female | 0-6 days    | 1-4 years | 1         | SEV unsafe water                                                   |
| Diarrheal diseases | Female | 0-6 days    | 1-4 years | 1         | SEV unsafe sanitation                                              |
| Diarrheal diseases | Female | 0-6 days    | 1-4 years | -1        | Socio-demographic Index                                            |
| Diarrheal diseases | Female | 0-6 days    | 1-4 years | 1         | Stunting (proportion <2SD height for age, <5 years)                |
| Diarrheal diseases | Female | 0-6 days    | 1-4 years | 1         | Wasting (proportion <2SD weight for height, <5 years)              |
| Diarrheal diseases | Female | 0-6 days    | 1-4 years | -1        | Rotavirus coverage (proportion)                                    |
| Diarrheal diseases | Female | 0-6 days    | 1-4 years | -1        | Healthcare access and quality index                                |
| Diarrheal diseases | Female | 0-6 days    | 1-4 years | 1         | No handwashing with soap                                           |
| Diarrheal diseases | Female | 0-6 days    | 1-4 years | 1         | Suboptimal breastfeeding SEV                                       |

| Cause                        | Sex    | Age start | Age end   | Direction | Covariate                                              |
|------------------------------|--------|-----------|-----------|-----------|--------------------------------------------------------|
| Diarrheal diseases           | Female | 0-6 days  | 1-4 years | 1         | Zinc deficiency                                        |
| Lower respiratory infections | Male   | 5-9 years | 95+ years | 1         | Alcohol (liters per capita)                            |
| Lower respiratory infections | Male   | 5-9 years | 95+ years | -1        | DTP3 Coverage (proportion)                             |
| Lower respiratory infections | Male   | 5-9 years | 95+ years | -1        | Education (years per capita)                           |
| Lower respiratory infections | Male   | 5-9 years | 95+ years | -1        | LDI (IS per capita)                                    |
| Lower respiratory infections | Male   | 5-9 years | 95+ years | -1        | Mean BMI                                               |
| Lower respiratory infections | Male   | 5-9 years | 95+ years | 1         | Indoor Air Pollution (All Cooking Fuels)               |
| Lower respiratory infections | Male   | 5-9 years | 95+ years | 1         | Outdoor Air Pollution (PM2.5)                          |
| Lower respiratory infections | Male   | 5-9 years | 95+ years | 1         | Smoking Prevalence                                     |
| Lower respiratory infections | Male   | 5-9 years | 95+ years | -1        | PCV3 Coverage (proportion)                             |
| Lower respiratory infections | Male   | 5-9 years | 95+ years | 1         | Log-transformed SEV scalar: LRI                        |
| Lower respiratory infections | Male   | 5-9 years | 95+ years | 0         | SEV unsafe sanitation                                  |
| Lower respiratory infections | Male   | 5-9 years | 95+ years | -1        | Socio-demographic Index                                |
| Lower respiratory infections | Male   | 5-9 years | 95+ years | -1        | Healthcare access and quality index                    |
| Lower respiratory infections | Female | 5-9 years | 95+ years | 1         | Alcohol (liters per capita)                            |
| Lower respiratory infections | Female | 5-9 years | 95+ years | -1        | DTP3 Coverage (proportion)                             |
| Lower respiratory infections | Female | 5-9 years | 95+ years | -1        | Education (years per capita)                           |
| Lower respiratory infections | Female | 5-9 years | 95+ years | -1        | LDI (IS per capita)                                    |
| Lower respiratory infections | Female | 5-9 years | 95+ years | -1        | Mean BMI                                               |
| Lower respiratory infections | Female | 5-9 years | 95+ years | 1         | Indoor Air Pollution (All Cooking Fuels)               |
| Lower respiratory infections | Female | 5-9 years | 95+ years | 1         | Outdoor Air Pollution (PM2.5)                          |
| Lower respiratory infections | Female | 5-9 years | 95+ years | 1         | Smoking Prevalence                                     |
| Lower respiratory infections | Female | 5-9 years | 95+ years | -1        | PCV3 Coverage (proportion)                             |
| Lower respiratory infections | Female | 5-9 years | 95+ years | 1         | Log-transformed SEV scalar: LRI                        |
| Lower respiratory infections | Female | 5-9 years | 95+ years | 0         | SEV unsafe sanitation                                  |
| Lower respiratory infections | Female | 5-9 years | 95+ years | -1        | Socio-demographic Index                                |
| Lower respiratory infections | Female | 5-9 years | 95+ years | -1        | Healthcare access and quality index                    |
| Lower respiratory infections | Male   | 0-6 days  | 1-4 years | -1        | DTP3 Coverage (proportion)                             |
| Lower respiratory infections | Male   | 0-6 days  | 1-4 years | -1        | Hib3 Vaccine Coverage (proportion)                     |
| Lower respiratory infections | Male   | 0-6 days  | 1-4 years | -1        | LDI (IS per capita)                                    |
| Lower respiratory infections | Male   | 0-6 days  | 1-4 years | 1         | Underweight (proportion <2SD weight for age, <5 years) |
| Lower respiratory infections | Male   | 0-6 days  | 1-4 years | 1         | Indoor Air Pollution (All Cooking Fuels)               |
| Lower respiratory infections | Male   | 0-6 days  | 1-4 years | 1         | Outdoor Air Pollution (PM2.5)                          |
| Lower respiratory infections | Male   | 0-6 days  | 1-4 years | -1        | PCV3 Coverage (proportion)                             |
| Lower respiratory infections | Male   | 0-6 days  | 1-4 years | 1         | Vitamin A Deficiency Prevalence (age-standardized)     |
| Lower respiratory infections | Male   | 0-6 days  | 1-4 years | -1        | Maternal education (years per capita)                  |
| Lower respiratory infections | Male   | 0-6 days  | 1-4 years | 1         | Log-transformed SEV scalar: LRI                        |
| Lower respiratory infections | Male   | 0-6 days  | 1-4 years | 1         | SEV unsafe sanitation                                  |
| Lower respiratory infections | Male   | 0-6 days  | 1-4 years | -1        | Socio-demographic Index                                |
| Lower respiratory infections | Male   | 0-6 days  | 1-4 years | 1         | Stunting (proportion <2SD height for age, <5 years)    |
| Lower respiratory infections | Male   | 0-6 days  | 1-4 years | 1         | Wasting (proportion <2SD weight for height, <5 years)  |
| Lower respiratory infections | Male   | 0-6 days  | 1-4 years | -1        | Healthcare access and quality index                    |
| Lower respiratory infections | Male   | 0-6 days  | 1-4 years | 1         | No handwashing with soap                               |
| Lower respiratory infections | Male   | 0-6 days  | 1-4 years | 1         | Suboptimal breastfeeding SEV                           |
| Lower respiratory infections | Male   | 0-6 days  | 1-4 years | 1         | Zinc deficiency                                        |
| Lower respiratory infections | Male   | 0-6 days  | 1-4 years | 1         | Secondhand smoke                                       |
| Lower respiratory infections | Female | 0-6 days  | 1-4 years | -1        | DTP3 Coverage (proportion)                             |
| Lower respiratory infections | Female | 0-6 days  | 1-4 years | -1        | Hib3 Vaccine Coverage (proportion)                     |
| Lower respiratory infections | Female | 0-6 days  | 1-4 years | -1        | LDI (IS per capita)                                    |
| Lower respiratory infections | Female | 0-6 days  | 1-4 years | 1         | Underweight (proportion <2SD weight for age, <5 years) |
| Lower respiratory infections | Female | 0-6 days  | 1-4 years | 1         | Indoor Air Pollution (All Cooking Fuels)               |
| Lower respiratory infections | Female | 0-6 days  | 1-4 years | 1         | Outdoor Air Pollution (PM2.5)                          |
| Lower respiratory infections | Female | 0-6 days  | 1-4 years | -1        | PCV3 Coverage (proportion)                             |
| Lower respiratory infections | Female | 0-6 days  | 1-4 years | 1         | Vitamin A Deficiency Prevalence (age-standardized)     |
| Lower respiratory infections | Female | 0-6 days  | 1-4 years | -1        | Maternal education (years per capita)                  |
| Lower respiratory infections | Female | 0-6 days  | 1-4 years | 1         | Log-transformed SEV scalar: LRI                        |
| Lower respiratory infections | Female | 0-6 days  | 1-4 years | 1         | SEV unsafe sanitation                                  |
| Lower respiratory infections | Female | 0-6 days  | 1-4 years | -1        | Socio-demographic Index                                |
| Lower respiratory infections | Female | 0-6 days  | 1-4 years | 1         | Stunting (proportion <2SD height for age, <5 years)    |
| Lower respiratory infections | Female | 0-6 days  | 1-4 years | 1         | Wasting (proportion <2SD weight for height, <5 years)  |
| Lower respiratory infections | Female | 0-6 days  | 1-4 years | -1        | Healthcare access and quality index                    |
| Lower respiratory infections | Female | 0-6 days  | 1-4 years | 1         | No handwashing with soap                               |
| Lower respiratory infections | Female | 0-6 days  | 1-4 years | 1         | Suboptimal breastfeeding SEV                           |
| Lower respiratory infections | Female | 0-6 days  | 1-4 years | 1         | Zinc deficiency                                        |
| Lower respiratory infections | Female | 0-6 days  | 1-4 years | 1         | Secondhand smoke                                       |
| Lower respiratory infections | Male   | 5-9 years | 95+ years | -1        | SEV unsafe sanitation                                  |
| Lower respiratory infections | Female | 5-9 years | 95+ years | -1        | SEV unsafe sanitation                                  |
| Otitis media                 | Male   | 0-6 days  | 95+ years | -1        | Education (years per capita)                           |
| Otitis media                 | Male   | 0-6 days  | 95+ years | -1        | LDI (IS per capita)                                    |
| Otitis media                 | Male   | 0-6 days  | 95+ years | 1         | Indoor Air Pollution (All Cooking Fuels)               |
| Otitis media                 | Male   | 0-6 days  | 95+ years | 1         | Outdoor Air Pollution (PM2.5)                          |
| Otitis media                 | Male   | 0-6 days  | 95+ years | 1         | Smoking Prevalence                                     |
| Otitis media                 | Male   | 0-6 days  | 95+ years | 1         | Log-transformed SEV scalar: Otitis                     |
| Otitis media                 | Male   | 0-6 days  | 95+ years | -1        | Socio-demographic Index                                |
| Otitis media                 | Male   | 0-6 days  | 95+ years | -1        | Healthcare access and quality index                    |
| Otitis media                 | Female | 0-6 days  | 95+ years | -1        | Education (years per capita)                           |
| Otitis media                 | Female | 0-6 days  | 95+ years | -1        | LDI (IS per capita)                                    |
| Otitis media                 | Female | 0-6 days  | 95+ years | 1         | Indoor Air Pollution (All Cooking Fuels)               |
| Otitis media                 | Female | 0-6 days  | 95+ years | 1         | Outdoor Air Pollution (PM2.5)                          |
| Otitis media                 | Female | 0-6 days  | 95+ years | 1         | Smoking Prevalence                                     |
| Otitis media                 | Female | 0-6 days  | 95+ years | 1         | Log-transformed SEV scalar: Otitis                     |
| Otitis media                 | Female | 0-6 days  | 95+ years | -1        | Socio-demographic Index                                |
| Otitis media                 | Female | 0-6 days  | 95+ years | -1        | Healthcare access and quality index                    |
| Meningitis                   | Female | 0-6 days  | 1-4 years | -1        | DTP3 Coverage (proportion)                             |
| Meningitis                   | Female | 0-6 days  | 1-4 years | -1        | LDI (IS per capita)                                    |
| Meningitis                   | Female | 0-6 days  | 1-4 years | 1         | Underweight (proportion <2SD weight for age, <5 years) |
| Meningitis                   | Female | 0-6 days  | 1-4 years | -1        | Sanitation (proportion with access)                    |
| Meningitis                   | Female | 0-6 days  | 1-4 years | -1        | Improved Water Source (proportion with access)         |
| Meningitis                   | Female | 0-6 days  | 1-4 years | -1        | Health System Access (capped)                          |
| Meningitis                   | Female | 0-6 days  | 1-4 years | -1        | Maternal education (years per capita)                  |
| Meningitis                   | Female | 0-6 days  | 1-4 years | 1         | meningitis belt (proportion)                           |
| Meningitis                   | Female | 0-6 days  | 1-4 years | -1        | Socio-demographic Index                                |

| Cause        | Sex    | Age start   | Age end     | Direction | Covariate                                                                                                 |
|--------------|--------|-------------|-------------|-----------|-----------------------------------------------------------------------------------------------------------|
| Meningitis   | Female | 0-6 days    | 1-4 years   | -1        | Proportion of total population covered by menafrivac initiative (meningitis meningococcal type A vaccine) |
| Meningitis   | Female | 0-6 days    | 1-4 years   | -1        | Healthcare access and quality index                                                                       |
| Meningitis   | Male   | 0-6 days    | 1-4 years   | -1        | DTP3 Coverage (proportion)                                                                                |
| Meningitis   | Male   | 0-6 days    | 1-4 years   | -1        | LDI (I\$ per capita)                                                                                      |
| Meningitis   | Male   | 0-6 days    | 1-4 years   | 1         | Underweight (proportion <2SD weight for age, <5 years)                                                    |
| Meningitis   | Male   | 0-6 days    | 1-4 years   | -1        | Sanitation (proportion with access)                                                                       |
| Meningitis   | Male   | 0-6 days    | 1-4 years   | -1        | Improved Water Source (proportion with access)                                                            |
| Meningitis   | Male   | 0-6 days    | 1-4 years   | -1        | Health System Access (capped)                                                                             |
| Meningitis   | Male   | 0-6 days    | 1-4 years   | -1        | Maternal education (years per capita)                                                                     |
| Meningitis   | Male   | 0-6 days    | 1-4 years   | 1         | meningitis belt (proportion)                                                                              |
| Meningitis   | Male   | 0-6 days    | 1-4 years   | -1        | Socio-demographic Index                                                                                   |
| Meningitis   | Male   | 0-6 days    | 1-4 years   | -1        | Proportion of total population covered by menafrivac initiative (meningitis meningococcal type A vaccine) |
| Meningitis   | Male   | 0-6 days    | 1-4 years   | -1        | Healthcare access and quality index                                                                       |
| Meningitis   | Male   | 5-9 years   | 95+ years   | -1        | DTP3 Coverage (proportion)                                                                                |
| Meningitis   | Male   | 5-9 years   | 95+ years   | -1        | LDI (I\$ per capita)                                                                                      |
| Meningitis   | Male   | 5-9 years   | 95+ years   | 1         | Underweight (proportion <2SD weight for age, <5 years)                                                    |
| Meningitis   | Male   | 5-9 years   | 95+ years   | -1        | Sanitation (proportion with access)                                                                       |
| Meningitis   | Male   | 5-9 years   | 95+ years   | -1        | Improved Water Source (proportion with access)                                                            |
| Meningitis   | Male   | 5-9 years   | 95+ years   | -1        | Health System Access (capped)                                                                             |
| Meningitis   | Male   | 5-9 years   | 95+ years   | -1        | Maternal education (years per capita)                                                                     |
| Meningitis   | Male   | 5-9 years   | 95+ years   | 1         | meningitis belt (proportion)                                                                              |
| Meningitis   | Male   | 5-9 years   | 95+ years   | -1        | Socio-demographic Index                                                                                   |
| Meningitis   | Male   | 5-9 years   | 95+ years   | -1        | Proportion of total population covered by menafrivac initiative (meningitis meningococcal type A vaccine) |
| Meningitis   | Male   | 5-9 years   | 95+ years   | -1        | Healthcare access and quality index                                                                       |
| Meningitis   | Female | 5-9 years   | 95+ years   | -1        | DTP3 Coverage (proportion)                                                                                |
| Meningitis   | Female | 5-9 years   | 95+ years   | -1        | LDI (I\$ per capita)                                                                                      |
| Meningitis   | Female | 5-9 years   | 95+ years   | 1         | Underweight (proportion <2SD weight for age, <5 years)                                                    |
| Meningitis   | Female | 5-9 years   | 95+ years   | -1        | Sanitation (proportion with access)                                                                       |
| Meningitis   | Female | 5-9 years   | 95+ years   | -1        | Improved Water Source (proportion with access)                                                            |
| Meningitis   | Female | 5-9 years   | 95+ years   | -1        | Health System Access (capped)                                                                             |
| Meningitis   | Female | 5-9 years   | 95+ years   | -1        | Maternal education (years per capita)                                                                     |
| Meningitis   | Female | 5-9 years   | 95+ years   | 1         | meningitis belt (proportion)                                                                              |
| Meningitis   | Female | 5-9 years   | 95+ years   | -1        | Socio-demographic Index                                                                                   |
| Meningitis   | Female | 5-9 years   | 95+ years   | -1        | Proportion of total population covered by menafrivac initiative (meningitis meningococcal type A vaccine) |
| Meningitis   | Female | 5-9 years   | 95+ years   | -1        | Healthcare access and quality index                                                                       |
| Encephalitis | Male   | 0-6 days    | 95+ years   | -1        | In-Facility Delivery (proportion)                                                                         |
| Encephalitis | Male   | 0-6 days    | 95+ years   | -1        | LDI (I\$ per capita)                                                                                      |
| Encephalitis | Male   | 0-6 days    | 95+ years   | 1         | Underweight (proportion <2SD weight for age, <5 years)                                                    |
| Encephalitis | Male   | 0-6 days    | 95+ years   | -1        | Sanitation (proportion with access)                                                                       |
| Encephalitis | Male   | 0-6 days    | 95+ years   | -1        | Improved Water Source (proportion with access)                                                            |
| Encephalitis | Male   | 0-6 days    | 95+ years   | -1        | Health System Access (capped)                                                                             |
| Encephalitis | Male   | 0-6 days    | 95+ years   | -1        | Maternal education (years per capita)                                                                     |
| Encephalitis | Male   | 0-6 days    | 95+ years   | -1        | Socio-demographic Index                                                                                   |
| Encephalitis | Male   | 0-6 days    | 95+ years   | 1         | Japanese encephalitis endemic area (binary)                                                               |
| Encephalitis | Male   | 0-6 days    | 95+ years   | -1        | Healthcare access and quality index                                                                       |
| Encephalitis | Female | 0-6 days    | 95+ years   | -1        | In-Facility Delivery (proportion)                                                                         |
| Encephalitis | Female | 0-6 days    | 95+ years   | -1        | LDI (I\$ per capita)                                                                                      |
| Encephalitis | Female | 0-6 days    | 95+ years   | 1         | Underweight (proportion <2SD weight for age, <5 years)                                                    |
| Encephalitis | Female | 0-6 days    | 95+ years   | -1        | Sanitation (proportion with access)                                                                       |
| Encephalitis | Female | 0-6 days    | 95+ years   | -1        | Improved Water Source (proportion with access)                                                            |
| Encephalitis | Female | 0-6 days    | 95+ years   | -1        | Health System Access (capped)                                                                             |
| Encephalitis | Female | 0-6 days    | 95+ years   | -1        | Maternal education (years per capita)                                                                     |
| Encephalitis | Female | 0-6 days    | 95+ years   | -1        | Socio-demographic Index                                                                                   |
| Encephalitis | Female | 0-6 days    | 95+ years   | 1         | Japanese encephalitis endemic area (binary)                                                               |
| Encephalitis | Female | 0-6 days    | 95+ years   | -1        | Healthcare access and quality index                                                                       |
| Tetanus      | Male   | 0-6 days    | 28-364 days | -1        | DTP3 Coverage (proportion)                                                                                |
| Tetanus      | Male   | 0-6 days    | 28-364 days | -1        | Education (years per capita)                                                                              |
| Tetanus      | Male   | 0-6 days    | 28-364 days | -1        | In-Facility Delivery (proportion)                                                                         |
| Tetanus      | Male   | 0-6 days    | 28-364 days | -1        | LDI (I\$ per capita)                                                                                      |
| Tetanus      | Male   | 0-6 days    | 28-364 days | -1        | Skilled Birth Attendance (proportion)                                                                     |
| Tetanus      | Male   | 0-6 days    | 28-364 days | -1        | Tetanus Toxoid Coverage Smooth (proportion)                                                               |
| Tetanus      | Male   | 0-6 days    | 28-364 days | -1        | Health System Access (capped)                                                                             |
| Tetanus      | Male   | 0-6 days    | 28-364 days | -1        | Socio-demographic Index                                                                                   |
| Tetanus      | Male   | 0-6 days    | 28-364 days | -1        | Healthcare access and quality index                                                                       |
| Tetanus      | Male   | 1-4 years   | 95+ years   | -1        | DTP3 Coverage (proportion)                                                                                |
| Tetanus      | Male   | 1-4 years   | 95+ years   | -1        | Education (years per capita)                                                                              |
| Tetanus      | Male   | 1-4 years   | 95+ years   | -1        | LDI (I\$ per capita)                                                                                      |
| Tetanus      | Male   | 1-4 years   | 95+ years   | -1        | Sanitation (proportion with access)                                                                       |
| Tetanus      | Male   | 1-4 years   | 95+ years   | -1        | Health System Access (capped)                                                                             |
| Tetanus      | Male   | 1-4 years   | 95+ years   | -1        | Socio-demographic Index                                                                                   |
| Tetanus      | Male   | 1-4 years   | 95+ years   | -1        | Healthcare access and quality index                                                                       |
| Tetanus      | Female | 0-6 days    | 28-364 days | -1        | DTP3 Coverage (proportion)                                                                                |
| Tetanus      | Female | 0-6 days    | 28-364 days | -1        | Education (years per capita)                                                                              |
| Tetanus      | Female | 0-6 days    | 28-364 days | -1        | In-Facility Delivery (proportion)                                                                         |
| Tetanus      | Female | 0-6 days    | 28-364 days | -1        | LDI (I\$ per capita)                                                                                      |
| Tetanus      | Female | 0-6 days    | 28-364 days | -1        | Skilled Birth Attendance (proportion)                                                                     |
| Tetanus      | Female | 0-6 days    | 28-364 days | -1        | Tetanus Toxoid Coverage Smooth (proportion)                                                               |
| Tetanus      | Female | 0-6 days    | 28-364 days | -1        | Health System Access (capped)                                                                             |
| Tetanus      | Female | 0-6 days    | 28-364 days | -1        | Socio-demographic Index                                                                                   |
| Tetanus      | Female | 0-6 days    | 28-364 days | -1        | Healthcare access and quality index                                                                       |
| Tetanus      | Female | 1-4 years   | 95+ years   | -1        | DTP3 Coverage (proportion)                                                                                |
| Tetanus      | Female | 1-4 years   | 95+ years   | -1        | Education (years per capita)                                                                              |
| Tetanus      | Female | 1-4 years   | 95+ years   | -1        | LDI (I\$ per capita)                                                                                      |
| Tetanus      | Female | 1-4 years   | 95+ years   | -1        | Sanitation (proportion with access)                                                                       |
| Tetanus      | Female | 1-4 years   | 95+ years   | -1        | Health System Access (capped)                                                                             |
| Tetanus      | Female | 1-4 years   | 95+ years   | -1        | Socio-demographic Index                                                                                   |
| Tetanus      | Female | 1-4 years   | 95+ years   | -1        | Healthcare access and quality index                                                                       |
| Dengue       | Male   | 28-364 days | 95+ years   | 0         | Education (years per capita)                                                                              |
| Dengue       | Male   | 28-364 days | 95+ years   | 0         | Health System Access (unitless)                                                                           |
| Dengue       | Male   | 28-364 days | 95+ years   | 0         | LDI (I\$ per capita)                                                                                      |
| Dengue       | Male   | 28-364 days | 95+ years   | 1         | Latitude Under 15 (proportion)                                                                            |
| Dengue       | Male   | 28-364 days | 95+ years   | 1         | Population Density (over 1000 ppl/sqkm, proportion)                                                       |

| Cause                                | Sex    | Age start   | Age end   | Direction | Covariate                                                    |
|--------------------------------------|--------|-------------|-----------|-----------|--------------------------------------------------------------|
| Dengue                               | Male   | 28-364 days | 95+ years | 1         | Elevation Under 100m (proportion)                            |
| Dengue                               | Male   | 28-364 days | 95+ years | 1         | Rainfall Quintile 4 (proportion)                             |
| Dengue                               | Male   | 28-364 days | 95+ years | 1         | Rainfall Quintile 5 (proportion)                             |
| Dengue                               | Male   | 28-364 days | 95+ years | 1         | Population weighted probability of dengue transmission       |
| Dengue                               | Male   | 28-364 days | 95+ years | 1         | Dengue outbreaks (binary)                                    |
| Dengue                               | Male   | 28-364 days | 95+ years | 1         | Dengue anomalies (deviation from mean dengue incidence rate) |
| Dengue                               | Male   | 28-364 days | 95+ years | 0         | Socio-demographic Index                                      |
| Dengue                               | Female | 28-364 days | 95+ years | 0         | Education (years per capita)                                 |
| Dengue                               | Female | 28-364 days | 95+ years | 0         | Health System Access (unitless)                              |
| Dengue                               | Female | 28-364 days | 95+ years | 0         | LDI (IS per capita)                                          |
| Dengue                               | Female | 28-364 days | 95+ years | 1         | Latitude Under 15 (proportion)                               |
| Dengue                               | Female | 28-364 days | 95+ years | 1         | Population Density (over 1000 ppl/sqkm, proportion)          |
| Dengue                               | Female | 28-364 days | 95+ years | 1         | Elevation Under 100m (proportion)                            |
| Dengue                               | Female | 28-364 days | 95+ years | 1         | Rainfall Quintile 4 (proportion)                             |
| Dengue                               | Female | 28-364 days | 95+ years | 1         | Rainfall Quintile 5 (proportion)                             |
| Dengue                               | Female | 28-364 days | 95+ years | 1         | Population weighted probability of dengue transmission       |
| Dengue                               | Female | 28-364 days | 95+ years | 1         | Dengue outbreaks (binary)                                    |
| Dengue                               | Female | 28-364 days | 95+ years | 1         | Dengue anomalies (deviation from mean dengue incidence rate) |
| Dengue                               | Female | 28-364 days | 95+ years | 0         | Socio-demographic Index                                      |
| Dengue                               | Male   | 28-364 days | 95+ years | 1         | Healthcare access and quality index                          |
| Dengue                               | Female | 28-364 days | 95+ years | 1         | Healthcare access and quality index                          |
| Rabies                               | Male   | 28-364 days | 95+ years | -1        | Antenatal Care (4 visits) Coverage (proportion)              |
| Rabies                               | Male   | 28-364 days | 95+ years | -1        | Health System Access (unitless)                              |
| Rabies                               | Male   | 28-364 days | 95+ years | -1        | In-Facility Delivery (proportion)                            |
| Rabies                               | Male   | 28-364 days | 95+ years | 0         | Population Density (500-1000 ppl/sqkm, proportion)           |
| Rabies                               | Male   | 28-364 days | 95+ years | 0         | Population Density (under 150 ppl/sqkm, proportion)          |
| Rabies                               | Male   | 28-364 days | 95+ years | -1        | Skilled Birth Attendance (proportion)                        |
| Rabies                               | Male   | 28-364 days | 95+ years | -1        | Socio-demographic Index                                      |
| Rabies                               | Male   | 28-364 days | 95+ years | -1        | Health System Access (capped)                                |
| Rabies                               | Male   | 28-364 days | 95+ years | -1        | Healthcare access and quality index                          |
| Rabies                               | Female | 28-364 days | 95+ years | -1        | Antenatal Care (4 visits) Coverage (proportion)              |
| Rabies                               | Female | 28-364 days | 95+ years | -1        | Health System Access (unitless)                              |
| Rabies                               | Female | 28-364 days | 95+ years | -1        | In-Facility Delivery (proportion)                            |
| Rabies                               | Female | 28-364 days | 95+ years | 0         | Population Density (500-1000 ppl/sqkm, proportion)           |
| Rabies                               | Female | 28-364 days | 95+ years | 0         | Population Density (under 150 ppl/sqkm, proportion)          |
| Rabies                               | Female | 28-364 days | 95+ years | -1        | Skilled Birth Attendance (proportion)                        |
| Rabies                               | Female | 28-364 days | 95+ years | -1        | Socio-demographic Index                                      |
| Rabies                               | Female | 28-364 days | 95+ years | -1        | Health System Access (capped)                                |
| Rabies                               | Female | 28-364 days | 95+ years | -1        | Healthcare access and quality index                          |
| Rabies                               | Male   | 28-364 days | 95+ years | 1         | Healthcare access and quality index                          |
| Rabies                               | Female | 28-364 days | 95+ years | 1         | Healthcare access and quality index                          |
| Other neglected tropical diseases    | Male   | 0-6 days    | 95+ years | -1        | Education (years per capita)                                 |
| Other neglected tropical diseases    | Male   | 0-6 days    | 95+ years | -1        | LDI (IS per capita)                                          |
| Other neglected tropical diseases    | Male   | 0-6 days    | 95+ years | 1         | Latitude Under 15 (proportion)                               |
| Other neglected tropical diseases    | Male   | 0-6 days    | 95+ years | 1         | Rainfall Quintile 5 (proportion)                             |
| Other neglected tropical diseases    | Male   | 0-6 days    | 95+ years | -1        | Sanitation (proportion with access)                          |
| Other neglected tropical diseases    | Male   | 0-6 days    | 95+ years | -1        | Socio-demographic Index                                      |
| Other neglected tropical diseases    | Male   | 0-6 days    | 95+ years | -1        | Healthcare access and quality index                          |
| Other neglected tropical diseases    | Female | 0-6 days    | 95+ years | -1        | Education (years per capita)                                 |
| Other neglected tropical diseases    | Female | 0-6 days    | 95+ years | -1        | LDI (IS per capita)                                          |
| Other neglected tropical diseases    | Female | 0-6 days    | 95+ years | 1         | Latitude Under 15 (proportion)                               |
| Other neglected tropical diseases    | Female | 0-6 days    | 95+ years | 1         | Rainfall Quintile 5 (proportion)                             |
| Other neglected tropical diseases    | Female | 0-6 days    | 95+ years | -1        | Sanitation (proportion with access)                          |
| Other neglected tropical diseases    | Female | 0-6 days    | 95+ years | -1        | Socio-demographic Index                                      |
| Other neglected tropical diseases    | Female | 0-6 days    | 95+ years | -1        | Healthcare access and quality index                          |
| Neonatal disorders                   | Male   | 0-6 days    | 1-4 years | -1        | Antenatal Care (4 visits) Coverage (proportion)              |
| Neonatal disorders                   | Male   | 0-6 days    | 1-4 years | -1        | Education (years per capita)                                 |
| Neonatal disorders                   | Male   | 0-6 days    | 1-4 years | -1        | In-Facility Delivery (proportion)                            |
| Neonatal disorders                   | Male   | 0-6 days    | 1-4 years | -1        | LDI (IS per capita)                                          |
| Neonatal disorders                   | Male   | 0-6 days    | 1-4 years | 1         | Underweight (proportion <2SD weight for age, <5 years)       |
| Neonatal disorders                   | Male   | 0-6 days    | 1-4 years | 1         | Live Births 35+ (proportion)                                 |
| Neonatal disorders                   | Male   | 0-6 days    | 1-4 years | 1         | Indoor Air Pollution (All Cooking Fuels)                     |
| Neonatal disorders                   | Male   | 0-6 days    | 1-4 years | -1        | Skilled Birth Attendance (proportion)                        |
| Neonatal disorders                   | Male   | 0-6 days    | 1-4 years | 1         | Smoking Prevalence (Reproductive Age Standardized)           |
| Neonatal disorders                   | Male   | 0-6 days    | 1-4 years | 1         | Total Fertility Rate                                         |
| Neonatal disorders                   | Male   | 0-6 days    | 1-4 years | -1        | Health System Access (capped)                                |
| Neonatal disorders                   | Male   | 0-6 days    | 1-4 years | -1        | Socio-demographic Index                                      |
| Neonatal disorders                   | Male   | 0-6 days    | 1-4 years | -1        | Healthcare access and quality index                          |
| Neonatal disorders                   | Female | 0-6 days    | 1-4 years | -1        | Antenatal Care (4 visits) Coverage (proportion)              |
| Neonatal disorders                   | Female | 0-6 days    | 1-4 years | -1        | Education (years per capita)                                 |
| Neonatal disorders                   | Female | 0-6 days    | 1-4 years | -1        | In-Facility Delivery (proportion)                            |
| Neonatal disorders                   | Female | 0-6 days    | 1-4 years | -1        | LDI (IS per capita)                                          |
| Neonatal disorders                   | Female | 0-6 days    | 1-4 years | 1         | Underweight (proportion <2SD weight for age, <5 years)       |
| Neonatal disorders                   | Female | 0-6 days    | 1-4 years | 1         | Live Births 35+ (proportion)                                 |
| Neonatal disorders                   | Female | 0-6 days    | 1-4 years | 1         | Indoor Air Pollution (All Cooking Fuels)                     |
| Neonatal disorders                   | Female | 0-6 days    | 1-4 years | -1        | Skilled Birth Attendance (proportion)                        |
| Neonatal disorders                   | Female | 0-6 days    | 1-4 years | 1         | Smoking Prevalence (Reproductive Age Standardized)           |
| Neonatal disorders                   | Female | 0-6 days    | 1-4 years | 1         | Total Fertility Rate                                         |
| Neonatal disorders                   | Female | 0-6 days    | 1-4 years | -1        | Health System Access (capped)                                |
| Neonatal disorders                   | Female | 0-6 days    | 1-4 years | -1        | Socio-demographic Index                                      |
| Neonatal disorders                   | Female | 0-6 days    | 1-4 years | -1        | Healthcare access and quality index                          |
| Neonatal preterm birth complications | Male   | 0-6 days    | 1-4 years | -1        | Antenatal Care (4 visits) Coverage (proportion)              |
| Neonatal preterm birth complications | Male   | 0-6 days    | 1-4 years | -1        | Education (years per capita)                                 |
| Neonatal preterm birth complications | Male   | 0-6 days    | 1-4 years | -1        | In-Facility Delivery (proportion)                            |
| Neonatal preterm birth complications | Male   | 0-6 days    | 1-4 years | -1        | LDI (IS per capita)                                          |
| Neonatal preterm birth complications | Male   | 0-6 days    | 1-4 years | 1         | Underweight (proportion <2SD weight for age, <5 years)       |
| Neonatal preterm birth complications | Male   | 0-6 days    | 1-4 years | 1         | Live Births 35+ (proportion)                                 |
| Neonatal preterm birth complications | Male   | 0-6 days    | 1-4 years | 1         | Indoor Air Pollution (All Cooking Fuels)                     |
| Neonatal preterm birth complications | Male   | 0-6 days    | 1-4 years | -1        | Skilled Birth Attendance (proportion)                        |
| Neonatal preterm birth complications | Male   | 0-6 days    | 1-4 years | 1         | Smoking Prevalence (Reproductive Age Standardized)           |
| Neonatal preterm birth complications | Male   | 0-6 days    | 1-4 years | 1         | Total Fertility Rate                                         |
| Neonatal preterm birth complications | Male   | 0-6 days    | 1-4 years | -1        | Health System Access (capped)                                |



| Cause                                         | Sex    | Age start   | Age end   | Direction | Covariate                                              |
|-----------------------------------------------|--------|-------------|-----------|-----------|--------------------------------------------------------|
| Hemolytic disease and other neonatal jaundice | Female | 0-6 days    | 1-4 years | -1        | Healthcare access and quality index                    |
| Other neonatal disorders                      | Male   | 0-6 days    | 1-4 years | -1        | Antenatal Care (4 visits) Coverage (proportion)        |
| Other neonatal disorders                      | Male   | 0-6 days    | 1-4 years | -1        | Education (years per capita)                           |
| Other neonatal disorders                      | Male   | 0-6 days    | 1-4 years | -1        | In-Facility Delivery (proportion)                      |
| Other neonatal disorders                      | Male   | 0-6 days    | 1-4 years | -1        | LDI (IS per capita)                                    |
| Other neonatal disorders                      | Male   | 0-6 days    | 1-4 years | 1         | Underweight (proportion <2SD weight for age, <5 years) |
| Other neonatal disorders                      | Male   | 0-6 days    | 1-4 years | 1         | Live Births 35+ (proportion)                           |
| Other neonatal disorders                      | Male   | 0-6 days    | 1-4 years | 1         | Indoor Air Pollution (All Cooking Fuels)               |
| Other neonatal disorders                      | Male   | 0-6 days    | 1-4 years | -1        | Skilled Birth Attendance (proportion)                  |
| Other neonatal disorders                      | Male   | 0-6 days    | 1-4 years | 1         | Smoking Prevalence (Reproductive Age Standardized)     |
| Other neonatal disorders                      | Male   | 0-6 days    | 1-4 years | 1         | Total Fertility Rate                                   |
| Other neonatal disorders                      | Male   | 0-6 days    | 1-4 years | -1        | Health System Access (capped)                          |
| Other neonatal disorders                      | Male   | 0-6 days    | 1-4 years | -1        | Socio-demographic Index                                |
| Other neonatal disorders                      | Male   | 0-6 days    | 1-4 years | -1        | Healthcare access and quality index                    |
| Other neonatal disorders                      | Female | 0-6 days    | 1-4 years | -1        | Antenatal Care (4 visits) Coverage (proportion)        |
| Other neonatal disorders                      | Female | 0-6 days    | 1-4 years | -1        | Education (years per capita)                           |
| Other neonatal disorders                      | Female | 0-6 days    | 1-4 years | -1        | In-Facility Delivery (proportion)                      |
| Other neonatal disorders                      | Female | 0-6 days    | 1-4 years | -1        | LDI (IS per capita)                                    |
| Other neonatal disorders                      | Female | 0-6 days    | 1-4 years | 1         | Underweight (proportion <2SD weight for age, <5 years) |
| Other neonatal disorders                      | Female | 0-6 days    | 1-4 years | 1         | Live Births 35+ (proportion)                           |
| Other neonatal disorders                      | Female | 0-6 days    | 1-4 years | 1         | Indoor Air Pollution (All Cooking Fuels)               |
| Other neonatal disorders                      | Female | 0-6 days    | 1-4 years | -1        | Skilled Birth Attendance (proportion)                  |
| Other neonatal disorders                      | Female | 0-6 days    | 1-4 years | 1         | Smoking Prevalence (Reproductive Age Standardized)     |
| Other neonatal disorders                      | Female | 0-6 days    | 1-4 years | 1         | Total Fertility Rate                                   |
| Other neonatal disorders                      | Female | 0-6 days    | 1-4 years | -1        | Health System Access (capped)                          |
| Other neonatal disorders                      | Female | 0-6 days    | 1-4 years | -1        | Socio-demographic Index                                |
| Other neonatal disorders                      | Female | 0-6 days    | 1-4 years | -1        | Healthcare access and quality index                    |
| Nutritional deficiencies                      | Male   | 28-364 days | 95+ years | -1        | Antenatal Care (4 visits) Coverage (proportion)        |
| Nutritional deficiencies                      | Male   | 28-364 days | 95+ years | -1        | Education (years per capita)                           |
| Nutritional deficiencies                      | Male   | 28-364 days | 95+ years | -1        | Proportion of households using iodized salt (adjusted) |
| Nutritional deficiencies                      | Male   | 28-364 days | 95+ years | -1        | LDI (IS per capita)                                    |
| Nutritional deficiencies                      | Male   | 28-364 days | 95+ years | 1         | Underweight (proportion <2SD weight for age, <5 years) |
| Nutritional deficiencies                      | Male   | 28-364 days | 95+ years | 0         | Rainfall Quintile 1 (proportion)                       |
| Nutritional deficiencies                      | Male   | 28-364 days | 95+ years | 0         | Rainfall Quintile 2 (proportion)                       |
| Nutritional deficiencies                      | Male   | 28-364 days | 95+ years | -1        | Sanitation (proportion with access)                    |
| Nutritional deficiencies                      | Male   | 28-364 days | 95+ years | 1         | Mortality Rate Due to War Shocks (per 1 person)        |
| Nutritional deficiencies                      | Male   | 28-364 days | 95+ years | -1        | Improved Water Source (proportion with access)         |
| Nutritional deficiencies                      | Male   | 28-364 days | 95+ years | 1         | Age-Standardize Prevalence of Severe Anemia            |
| Nutritional deficiencies                      | Male   | 28-364 days | 95+ years | -1        | Health System Access (capped)                          |
| Nutritional deficiencies                      | Male   | 28-364 days | 95+ years | -1        | Socio-demographic Index                                |
| Nutritional deficiencies                      | Male   | 28-364 days | 95+ years | -1        | energy unadjusted(kcal)                                |
| Nutritional deficiencies                      | Male   | 28-364 days | 95+ years | 1         | Wasting (proportion <2SD weight for height, <5 years)  |
| Nutritional deficiencies                      | Male   | 28-364 days | 95+ years | -1        | Healthcare access and quality index                    |
| Nutritional deficiencies                      | Male   | 28-364 days | 95+ years | 1         | Malnutrition Shock mortality rate                      |
| Nutritional deficiencies                      | Female | 28-364 days | 95+ years | -1        | Antenatal Care (4 visits) Coverage (proportion)        |
| Nutritional deficiencies                      | Female | 28-364 days | 95+ years | -1        | Education (years per capita)                           |
| Nutritional deficiencies                      | Female | 28-364 days | 95+ years | -1        | Proportion of households using iodized salt (adjusted) |
| Nutritional deficiencies                      | Female | 28-364 days | 95+ years | -1        | LDI (IS per capita)                                    |
| Nutritional deficiencies                      | Female | 28-364 days | 95+ years | 1         | Underweight (proportion <2SD weight for age, <5 years) |
| Nutritional deficiencies                      | Female | 28-364 days | 95+ years | 0         | Rainfall Quintile 1 (proportion)                       |
| Nutritional deficiencies                      | Female | 28-364 days | 95+ years | 0         | Rainfall Quintile 2 (proportion)                       |
| Nutritional deficiencies                      | Female | 28-364 days | 95+ years | -1        | Sanitation (proportion with access)                    |
| Nutritional deficiencies                      | Female | 28-364 days | 95+ years | 1         | Mortality Rate Due to War Shocks (per 1 person)        |
| Nutritional deficiencies                      | Female | 28-364 days | 95+ years | -1        | Improved Water Source (proportion with access)         |
| Nutritional deficiencies                      | Female | 28-364 days | 95+ years | 1         | Age-Standardize Prevalence of Severe Anemia            |
| Nutritional deficiencies                      | Female | 28-364 days | 95+ years | -1        | Health System Access (capped)                          |
| Nutritional deficiencies                      | Female | 28-364 days | 95+ years | -1        | Socio-demographic Index                                |
| Nutritional deficiencies                      | Female | 28-364 days | 95+ years | -1        | energy unadjusted(kcal)                                |
| Nutritional deficiencies                      | Female | 28-364 days | 95+ years | 1         | Wasting (proportion <2SD weight for height, <5 years)  |
| Nutritional deficiencies                      | Female | 28-364 days | 95+ years | -1        | Healthcare access and quality index                    |
| Nutritional deficiencies                      | Female | 28-364 days | 95+ years | 1         | Malnutrition Shock mortality rate                      |
| Protein-energy malnutrition                   | Male   | 5-9 years   | 95+ years | -1        | Antenatal Care (4 visits) Coverage (proportion)        |
| Protein-energy malnutrition                   | Male   | 5-9 years   | 95+ years | -1        | Education (years per capita)                           |
| Protein-energy malnutrition                   | Male   | 5-9 years   | 95+ years | -1        | LDI (IS per capita)                                    |
| Protein-energy malnutrition                   | Male   | 5-9 years   | 95+ years | 0         | Rainfall Quintile 1 (proportion)                       |
| Protein-energy malnutrition                   | Male   | 5-9 years   | 95+ years | 0         | Rainfall Quintile 2 (proportion)                       |
| Protein-energy malnutrition                   | Male   | 5-9 years   | 95+ years | -1        | Sanitation (proportion with access)                    |
| Protein-energy malnutrition                   | Male   | 5-9 years   | 95+ years | 1         | Mortality Rate Due to War Shocks (per 1 person)        |
| Protein-energy malnutrition                   | Male   | 5-9 years   | 95+ years | -1        | Improved Water Source (proportion with access)         |
| Protein-energy malnutrition                   | Male   | 5-9 years   | 95+ years | 1         | Age-Standardize Prevalence of Severe Anemia            |
| Protein-energy malnutrition                   | Male   | 5-9 years   | 95+ years | -1        | Health System Access (capped)                          |
| Protein-energy malnutrition                   | Male   | 5-9 years   | 95+ years | -1        | Socio-demographic Index                                |
| Protein-energy malnutrition                   | Male   | 5-9 years   | 95+ years | -1        | energy unadjusted(kcal)                                |
| Protein-energy malnutrition                   | Male   | 5-9 years   | 95+ years | -1        | Healthcare access and quality index                    |
| Protein-energy malnutrition                   | Male   | 5-9 years   | 95+ years | 1         | Malnutrition Shock mortality rate                      |
| Protein-energy malnutrition                   | Male   | 28-364 days | 1-4 years | -1        | Antenatal Care (4 visits) Coverage (proportion)        |
| Protein-energy malnutrition                   | Male   | 28-364 days | 1-4 years | -1        | Education (years per capita)                           |
| Protein-energy malnutrition                   | Male   | 28-364 days | 1-4 years | -1        | LDI (IS per capita)                                    |
| Protein-energy malnutrition                   | Male   | 28-364 days | 1-4 years | 0         | Rainfall Quintile 1 (proportion)                       |
| Protein-energy malnutrition                   | Male   | 28-364 days | 1-4 years | 0         | Rainfall Quintile 2 (proportion)                       |
| Protein-energy malnutrition                   | Male   | 28-364 days | 1-4 years | -1        | Sanitation (proportion with access)                    |
| Protein-energy malnutrition                   | Male   | 28-364 days | 1-4 years | 1         | Mortality Rate Due to War Shocks (per 1 person)        |
| Protein-energy malnutrition                   | Male   | 28-364 days | 1-4 years | -1        | Improved Water Source (proportion with access)         |
| Protein-energy malnutrition                   | Male   | 28-364 days | 1-4 years | 1         | Age-Standardize Prevalence of Severe Anemia            |
| Protein-energy malnutrition                   | Male   | 28-364 days | 1-4 years | -1        | Health System Access (capped)                          |
| Protein-energy malnutrition                   | Male   | 28-364 days | 1-4 years | -1        | Socio-demographic Index                                |
| Protein-energy malnutrition                   | Male   | 28-364 days | 1-4 years | -1        | energy unadjusted(kcal)                                |
| Protein-energy malnutrition                   | Male   | 28-364 days | 1-4 years | 1         | Wasting (proportion <2SD weight for height, <5 years)  |
| Protein-energy malnutrition                   | Male   | 28-364 days | 1-4 years | -1        | Healthcare access and quality index                    |
| Protein-energy malnutrition                   | Male   | 28-364 days | 1-4 years | 1         | Malnutrition Shock mortality rate                      |
| Protein-energy malnutrition                   | Female | 28-364 days | 1-4 years | -1        | Antenatal Care (4 visits) Coverage (proportion)        |
| Protein-energy malnutrition                   | Female | 28-364 days | 1-4 years | -1        | Education (years per capita)                           |

| Cause                                       | Sex    | Age start   | Age end   | Direction | Covariate                                              |
|---------------------------------------------|--------|-------------|-----------|-----------|--------------------------------------------------------|
| Protein-energy malnutrition                 | Female | 28-364 days | 1-4 years | -1        | LDI (IS per capita)                                    |
| Protein-energy malnutrition                 | Female | 28-364 days | 1-4 years | 0         | Rainfall Quintile 1 (proportion)                       |
| Protein-energy malnutrition                 | Female | 28-364 days | 1-4 years | 0         | Rainfall Quintile 2 (proportion)                       |
| Protein-energy malnutrition                 | Female | 28-364 days | 1-4 years | -1        | Sanitation (proportion with access)                    |
| Protein-energy malnutrition                 | Female | 28-364 days | 1-4 years | 1         | Mortality Rate Due to War Shocks (per 1 person)        |
| Protein-energy malnutrition                 | Female | 28-364 days | 1-4 years | -1        | Improved Water Source (proportion with access)         |
| Protein-energy malnutrition                 | Female | 28-364 days | 1-4 years | 1         | Age-Standardize Prevalence of Severe Anemia            |
| Protein-energy malnutrition                 | Female | 28-364 days | 1-4 years | -1        | Health System Access (capped)                          |
| Protein-energy malnutrition                 | Female | 28-364 days | 1-4 years | -1        | Socio-demographic Index                                |
| Protein-energy malnutrition                 | Female | 28-364 days | 1-4 years | -1        | energy unadjusted(kcal)                                |
| Protein-energy malnutrition                 | Female | 28-364 days | 1-4 years | 1         | Wasting (proportion <2SD weight for height, <5 years)  |
| Protein-energy malnutrition                 | Female | 28-364 days | 1-4 years | -1        | Healthcare access and quality index                    |
| Protein-energy malnutrition                 | Female | 5-9 years   | 95+ years | -1        | Antenatal Care (4 visits) Coverage (proportion)        |
| Protein-energy malnutrition                 | Female | 5-9 years   | 95+ years | -1        | Education (years per capita)                           |
| Protein-energy malnutrition                 | Female | 5-9 years   | 95+ years | -1        | LDI (IS per capita)                                    |
| Protein-energy malnutrition                 | Female | 5-9 years   | 95+ years | 0         | Rainfall Quintile 1 (proportion)                       |
| Protein-energy malnutrition                 | Female | 5-9 years   | 95+ years | 0         | Rainfall Quintile 2 (proportion)                       |
| Protein-energy malnutrition                 | Female | 5-9 years   | 95+ years | -1        | Sanitation (proportion with access)                    |
| Protein-energy malnutrition                 | Female | 5-9 years   | 95+ years | 1         | Mortality Rate Due to War Shocks (per 1 person)        |
| Protein-energy malnutrition                 | Female | 5-9 years   | 95+ years | -1        | Improved Water Source (proportion with access)         |
| Protein-energy malnutrition                 | Female | 5-9 years   | 95+ years | 1         | Age-Standardize Prevalence of Severe Anemia            |
| Protein-energy malnutrition                 | Female | 5-9 years   | 95+ years | -1        | Health System Access (capped)                          |
| Protein-energy malnutrition                 | Female | 5-9 years   | 95+ years | -1        | Socio-demographic Index                                |
| Protein-energy malnutrition                 | Female | 5-9 years   | 95+ years | -1        | energy unadjusted(kcal)                                |
| Protein-energy malnutrition                 | Female | 5-9 years   | 95+ years | -1        | Healthcare access and quality index                    |
| Iron-deficiency anemia                      | Male   | 28-364 days | 95+ years | -1        | Education (years per capita)                           |
| Iron-deficiency anemia                      | Male   | 28-364 days | 95+ years | -1        | LDI (IS per capita)                                    |
| Iron-deficiency anemia                      | Male   | 28-364 days | 95+ years | 1         | Underweight (proportion <2SD weight for age, <5 years) |
| Iron-deficiency anemia                      | Male   | 28-364 days | 95+ years | 0         | Rainfall Quintile 1 (proportion)                       |
| Iron-deficiency anemia                      | Male   | 28-364 days | 95+ years | 0         | Rainfall Quintile 2 (proportion)                       |
| Iron-deficiency anemia                      | Male   | 28-364 days | 95+ years | -1        | Sanitation (proportion with access)                    |
| Iron-deficiency anemia                      | Male   | 28-364 days | 95+ years | -1        | Total Calories (kcal per capita)                       |
| Iron-deficiency anemia                      | Male   | 28-364 days | 95+ years | -1        | Improved Water Source (proportion with access)         |
| Iron-deficiency anemia                      | Male   | 28-364 days | 95+ years | 1         | Age-Standardize Prevalence of Severe Anemia            |
| Iron-deficiency anemia                      | Male   | 28-364 days | 95+ years | -1        | Health System Access (capped)                          |
| Iron-deficiency anemia                      | Male   | 28-364 days | 95+ years | -1        | Socio-demographic Index                                |
| Iron-deficiency anemia                      | Male   | 28-364 days | 95+ years | -1        | Healthcare access and quality index                    |
| Iron-deficiency anemia                      | Female | 28-364 days | 95+ years | -1        | Education (years per capita)                           |
| Iron-deficiency anemia                      | Female | 28-364 days | 95+ years | -1        | LDI (IS per capita)                                    |
| Iron-deficiency anemia                      | Female | 28-364 days | 95+ years | 1         | Underweight (proportion <2SD weight for age, <5 years) |
| Iron-deficiency anemia                      | Female | 28-364 days | 95+ years | 0         | Rainfall Quintile 1 (proportion)                       |
| Iron-deficiency anemia                      | Female | 28-364 days | 95+ years | 0         | Rainfall Quintile 2 (proportion)                       |
| Iron-deficiency anemia                      | Female | 28-364 days | 95+ years | -1        | Sanitation (proportion with access)                    |
| Iron-deficiency anemia                      | Female | 28-364 days | 95+ years | -1        | Total Calories (kcal per capita)                       |
| Iron-deficiency anemia                      | Female | 28-364 days | 95+ years | -1        | Improved Water Source (proportion with access)         |
| Iron-deficiency anemia                      | Female | 28-364 days | 95+ years | 1         | Age-Standardize Prevalence of Severe Anemia            |
| Iron-deficiency anemia                      | Female | 28-364 days | 95+ years | -1        | Health System Access (capped)                          |
| Iron-deficiency anemia                      | Female | 28-364 days | 95+ years | -1        | Socio-demographic Index                                |
| Iron-deficiency anemia                      | Female | 28-364 days | 95+ years | -1        | Healthcare access and quality index                    |
| Iron-deficiency anemia                      | Male   | 28-364 days | 95+ years | -1        | Health System Access 2 (unitless)                      |
| Iron-deficiency anemia                      | Female | 28-364 days | 95+ years | -1        | Health System Access 2 (unitless)                      |
| Other nutritional deficiencies              | Female | 28-364 days | 95+ years | -1        | Education (years per capita)                           |
| Other nutritional deficiencies              | Female | 28-364 days | 95+ years | -1        | LDI (IS per capita)                                    |
| Other nutritional deficiencies              | Female | 28-364 days | 95+ years | 1         | Underweight (proportion <2SD weight for age, <5 years) |
| Other nutritional deficiencies              | Female | 28-364 days | 95+ years | 0         | Rainfall Quintile 1 (proportion)                       |
| Other nutritional deficiencies              | Female | 28-364 days | 95+ years | 0         | Rainfall Quintile 2 (proportion)                       |
| Other nutritional deficiencies              | Female | 28-364 days | 95+ years | -1        | Sanitation (proportion with access)                    |
| Other nutritional deficiencies              | Female | 28-364 days | 95+ years | 1         | Mortality Rate Due to War Shocks (per 1 person)        |
| Other nutritional deficiencies              | Female | 28-364 days | 95+ years | -1        | Improved Water Source (proportion with access)         |
| Other nutritional deficiencies              | Female | 28-364 days | 95+ years | 1         | Age-Standardize Prevalence of Severe Anemia            |
| Other nutritional deficiencies              | Female | 28-364 days | 95+ years | -1        | Health System Access (capped)                          |
| Other nutritional deficiencies              | Female | 28-364 days | 95+ years | -1        | Socio-demographic Index                                |
| Other nutritional deficiencies              | Female | 28-364 days | 95+ years | -1        | energy unadjusted(kcal)                                |
| Other nutritional deficiencies              | Female | 28-364 days | 95+ years | -1        | Healthcare access and quality index                    |
| Other nutritional deficiencies              | Female | 28-364 days | 95+ years | 1         | Malnutrition Shock mortality rate                      |
| Other nutritional deficiencies              | Male   | 28-364 days | 95+ years | -1        | Education (years per capita)                           |
| Other nutritional deficiencies              | Male   | 28-364 days | 95+ years | -1        | LDI (IS per capita)                                    |
| Other nutritional deficiencies              | Male   | 28-364 days | 95+ years | 1         | Underweight (proportion <2SD weight for age, <5 years) |
| Other nutritional deficiencies              | Male   | 28-364 days | 95+ years | 0         | Rainfall Quintile 1 (proportion)                       |
| Other nutritional deficiencies              | Male   | 28-364 days | 95+ years | 0         | Rainfall Quintile 2 (proportion)                       |
| Other nutritional deficiencies              | Male   | 28-364 days | 95+ years | -1        | Sanitation (proportion with access)                    |
| Other nutritional deficiencies              | Male   | 28-364 days | 95+ years | 1         | Mortality Rate Due to War Shocks (per 1 person)        |
| Other nutritional deficiencies              | Male   | 28-364 days | 95+ years | -1        | Improved Water Source (proportion with access)         |
| Other nutritional deficiencies              | Male   | 28-364 days | 95+ years | 1         | Age-Standardize Prevalence of Severe Anemia            |
| Other nutritional deficiencies              | Male   | 28-364 days | 95+ years | -1        | Health System Access (capped)                          |
| Other nutritional deficiencies              | Male   | 28-364 days | 95+ years | -1        | Socio-demographic Index                                |
| Other nutritional deficiencies              | Male   | 28-364 days | 95+ years | -1        | energy unadjusted(kcal)                                |
| Other nutritional deficiencies              | Male   | 28-364 days | 95+ years | -1        | Healthcare access and quality index                    |
| Other nutritional deficiencies              | Male   | 28-364 days | 95+ years | 1         | Malnutrition Shock mortality rate                      |
| Sexually transmitted diseases excluding HIV | Male   | 10-14 years | 95+ years | -1        | Legality of Abortion                                   |
| Sexually transmitted diseases excluding HIV | Male   | 10-14 years | 95+ years | -1        | Antenatal Care (1 visit) Coverage (proportion)         |
| Sexually transmitted diseases excluding HIV | Male   | 10-14 years | 95+ years | -1        | Antenatal Care (4 visits) Coverage (proportion)        |
| Sexually transmitted diseases excluding HIV | Male   | 10-14 years | 95+ years | 1         | Age-Specific Fertility Rate                            |
| Sexually transmitted diseases excluding HIV | Male   | 10-14 years | 95+ years | -1        | Education (years per capita)                           |
| Sexually transmitted diseases excluding HIV | Male   | 10-14 years | 95+ years | -1        | LDI (IS per capita)                                    |
| Sexually transmitted diseases excluding HIV | Male   | 10-14 years | 95+ years | 1         | Total Fertility Rate                                   |
| Sexually transmitted diseases excluding HIV | Male   | 10-14 years | 95+ years | -1        | Health System Access (capped)                          |
| Sexually transmitted diseases excluding HIV | Male   | 10-14 years | 95+ years | 1         | Syphilis prevalence (proportion)                       |
| Sexually transmitted diseases excluding HIV | Male   | 10-14 years | 95+ years | -1        | Healthcare access and quality index                    |
| Sexually transmitted diseases excluding HIV | Female | 10-14 years | 95+ years | -1        | Legality of Abortion                                   |
| Sexually transmitted diseases excluding HIV | Female | 10-14 years | 95+ years | -1        | Antenatal Care (1 visit) Coverage (proportion)         |
| Sexually transmitted diseases excluding HIV | Female | 10-14 years | 95+ years | -1        | Antenatal Care (4 visits) Coverage (proportion)        |

| Cause                                       | Sex    | Age start   | Age end   | Direction | Covariate                                              |
|---------------------------------------------|--------|-------------|-----------|-----------|--------------------------------------------------------|
| Sexually transmitted diseases excluding HIV | Female | 10-14 years | 95+ years | 1         | Age-Specific Fertility Rate                            |
| Sexually transmitted diseases excluding HIV | Female | 10-14 years | 95+ years | -1        | Education (years per capita)                           |
| Sexually transmitted diseases excluding HIV | Female | 10-14 years | 95+ years | -1        | LDI (IS per capita)                                    |
| Sexually transmitted diseases excluding HIV | Female | 10-14 years | 95+ years | 1         | Total Fertility Rate                                   |
| Sexually transmitted diseases excluding HIV | Female | 10-14 years | 95+ years | -1        | Health System Access (capped)                          |
| Sexually transmitted diseases excluding HIV | Female | 10-14 years | 95+ years | 1         | Syphilis prevalence (proportion)                       |
| Sexually transmitted diseases excluding HIV | Female | 10-14 years | 95+ years | -1        | Healthcare access and quality index                    |
| Hepatitis                                   | Female | 28-364 days | 95+ years | -1        | Education (years per capita)                           |
| Hepatitis                                   | Female | 28-364 days | 95+ years | -1        | Health System Access 2 (unitless)                      |
| Hepatitis                                   | Female | 28-364 days | 95+ years | -1        | LDI (IS per capita)                                    |
| Hepatitis                                   | Female | 28-364 days | 95+ years | -1        | Sanitation (proportion with access)                    |
| Hepatitis                                   | Female | 28-364 days | 95+ years | -1        | Improved Water Source (proportion with access)         |
| Hepatitis                                   | Female | 28-364 days | 95+ years | 1         | Log-transformed SEV scalar: Hep                        |
| Hepatitis                                   | Female | 28-364 days | 95+ years | -1        | Socio-demographic Index                                |
| Hepatitis                                   | Female | 28-364 days | 95+ years | 1         | Hepatitis B (HBsAg) Seroprevalence                     |
| Hepatitis                                   | Female | 28-364 days | 95+ years | 1         | Hepatitis C (IgG) Seroprevalence                       |
| Hepatitis                                   | Female | 28-364 days | 95+ years | 1         | Seroprevalence of anti-HAV (IgG)                       |
| Hepatitis                                   | Female | 28-364 days | 95+ years | 1         | Seroprevalence of anti-HEV (IgG)                       |
| Hepatitis                                   | Male   | 28-364 days | 95+ years | -1        | Education (years per capita)                           |
| Hepatitis                                   | Male   | 28-364 days | 95+ years | -1        | Health System Access 2 (unitless)                      |
| Hepatitis                                   | Male   | 28-364 days | 95+ years | -1        | LDI (IS per capita)                                    |
| Hepatitis                                   | Male   | 28-364 days | 95+ years | -1        | Sanitation (proportion with access)                    |
| Hepatitis                                   | Male   | 28-364 days | 95+ years | -1        | Improved Water Source (proportion with access)         |
| Hepatitis                                   | Male   | 28-364 days | 95+ years | 1         | Log-transformed SEV scalar: Hep                        |
| Hepatitis                                   | Male   | 28-364 days | 95+ years | -1        | Socio-demographic Index                                |
| Hepatitis                                   | Male   | 28-364 days | 95+ years | 1         | Hepatitis B (HBsAg) Seroprevalence                     |
| Hepatitis                                   | Male   | 28-364 days | 95+ years | 1         | Hepatitis C (IgG) Seroprevalence                       |
| Hepatitis                                   | Male   | 28-364 days | 95+ years | 1         | Seroprevalence of anti-HAV (IgG)                       |
| Hepatitis                                   | Male   | 28-364 days | 95+ years | 1         | Seroprevalence of anti-HEV (IgG)                       |
| Other infectious diseases                   | Male   | 0-6 days    | 95+ years | 1         | Underweight (proportion <2SD weight for age, <5 years) |
| Other infectious diseases                   | Male   | 0-6 days    | 95+ years | -1        | Sanitation (proportion with access)                    |
| Other infectious diseases                   | Male   | 0-6 days    | 95+ years | 1         | Rainfall Quintile 5 (proportion)                       |
| Other infectious diseases                   | Male   | 0-6 days    | 95+ years | -1        | Education (years per capita)                           |
| Other infectious diseases                   | Male   | 0-6 days    | 95+ years | -1        | DTP3 Coverage (proportion)                             |
| Other infectious diseases                   | Male   | 0-6 days    | 95+ years | -1        | Health System Access (unitless)                        |
| Other infectious diseases                   | Male   | 0-6 days    | 95+ years | 0         | Latitude 30 to 45 (proportion)                         |
| Other infectious diseases                   | Male   | 0-6 days    | 95+ years | -1        | Measles Vaccine Coverage (proportion)                  |
| Other infectious diseases                   | Male   | 0-6 days    | 95+ years | -1        | Latitude Over 45 (proportion)                          |
| Other infectious diseases                   | Male   | 0-6 days    | 95+ years | 0         | Rainfall Quintile 3 (proportion)                       |
| Other infectious diseases                   | Male   | 0-6 days    | 95+ years | 0         | Rainfall Quintile 2 (proportion)                       |
| Other infectious diseases                   | Male   | 0-6 days    | 95+ years | -1        | Rainfall Quintile 1 (proportion)                       |
| Other infectious diseases                   | Male   | 0-6 days    | 95+ years | -1        | LDI (IS per capita)                                    |
| Other infectious diseases                   | Male   | 0-6 days    | 95+ years | 0         | Latitude 15 to 30 (proportion)                         |
| Other infectious diseases                   | Male   | 0-6 days    | 95+ years | -1        | Antenatal Care (1 visit) Coverage (proportion)         |
| Other infectious diseases                   | Male   | 0-6 days    | 95+ years | 0         | Rainfall Quintile 4 (proportion)                       |
| Other infectious diseases                   | Male   | 0-6 days    | 95+ years | -1        | Improved Water Source (proportion with access)         |
| Other infectious diseases                   | Male   | 0-6 days    | 95+ years | 1         | Latitude Under 15 (proportion)                         |
| Other infectious diseases                   | Male   | 0-6 days    | 95+ years | -1        | Socio-demographic Index                                |
| Other infectious diseases                   | Female | 0-6 days    | 95+ years | 1         | Underweight (proportion <2SD weight for age, <5 years) |
| Other infectious diseases                   | Female | 0-6 days    | 95+ years | -1        | Sanitation (proportion with access)                    |
| Other infectious diseases                   | Female | 0-6 days    | 95+ years | 1         | Rainfall Quintile 5 (proportion)                       |
| Other infectious diseases                   | Female | 0-6 days    | 95+ years | -1        | Education (years per capita)                           |
| Other infectious diseases                   | Female | 0-6 days    | 95+ years | -1        | DTP3 Coverage (proportion)                             |
| Other infectious diseases                   | Female | 0-6 days    | 95+ years | -1        | Health System Access (unitless)                        |
| Other infectious diseases                   | Female | 0-6 days    | 95+ years | 0         | Latitude 30 to 45 (proportion)                         |
| Other infectious diseases                   | Female | 0-6 days    | 95+ years | -1        | Measles Vaccine Coverage (proportion)                  |
| Other infectious diseases                   | Female | 0-6 days    | 95+ years | -1        | Latitude Over 45 (proportion)                          |
| Other infectious diseases                   | Female | 0-6 days    | 95+ years | 0         | Rainfall Quintile 3 (proportion)                       |
| Other infectious diseases                   | Female | 0-6 days    | 95+ years | 0         | Rainfall Quintile 2 (proportion)                       |
| Other infectious diseases                   | Female | 0-6 days    | 95+ years | -1        | Rainfall Quintile 1 (proportion)                       |
| Other infectious diseases                   | Female | 0-6 days    | 95+ years | -1        | LDI (IS per capita)                                    |
| Other infectious diseases                   | Female | 0-6 days    | 95+ years | 0         | Latitude 15 to 30 (proportion)                         |
| Other infectious diseases                   | Female | 0-6 days    | 95+ years | -1        | Antenatal Care (1 visit) Coverage (proportion)         |
| Other infectious diseases                   | Female | 0-6 days    | 95+ years | 0         | Rainfall Quintile 4 (proportion)                       |
| Other infectious diseases                   | Female | 0-6 days    | 95+ years | -1        | Improved Water Source (proportion with access)         |
| Other infectious diseases                   | Female | 0-6 days    | 95+ years | 1         | Latitude Under 15 (proportion)                         |
| Other infectious diseases                   | Female | 0-6 days    | 95+ years | -1        | Socio-demographic Index                                |
| Other infectious diseases                   | Female | 0-6 days    | 95+ years | -1        | Health System Access (capped)                          |
| Other infectious diseases                   | Female | 0-6 days    | 95+ years | -1        | Healthcare access and quality index                    |
| Esophageal cancer                           | Male   | 15-19 years | 95+ years | 1         | Alcohol (liters per capita)                            |
| Esophageal cancer                           | Male   | 15-19 years | 95+ years | 1         | Tobacco (cigarettes per capita)                        |
| Esophageal cancer                           | Male   | 15-19 years | 95+ years | -1        | Education (years per capita)                           |
| Esophageal cancer                           | Male   | 15-19 years | 95+ years | -1        | Fruits (kcal per capita)                               |
| Esophageal cancer                           | Male   | 15-19 years | 95+ years | -1        | LDI (IS per capita)                                    |
| Esophageal cancer                           | Male   | 15-19 years | 95+ years | 1         | Mean BMI                                               |
| Esophageal cancer                           | Male   | 15-19 years | 95+ years | 1         | Indoor Air Pollution (All Cooking Fuels)               |
| Esophageal cancer                           | Male   | 15-19 years | 95+ years | -1        | Sanitation (proportion with access)                    |
| Esophageal cancer                           | Male   | 15-19 years | 95+ years | 1         | Smoking Prevalence                                     |
| Esophageal cancer                           | Male   | 15-19 years | 95+ years | -1        | Vegetables (kcal per capita)                           |
| Esophageal cancer                           | Male   | 15-19 years | 95+ years | -1        | Improved Water Source (proportion with access)         |
| Esophageal cancer                           | Male   | 15-19 years | 95+ years | 1         | Log-transformed age-standardized SEV scalar: Esophag C |
| Esophageal cancer                           | Male   | 15-19 years | 95+ years | -1        | Socio-demographic Index                                |
| Esophageal cancer                           | Male   | 15-19 years | 95+ years | -1        | Healthcare access and quality index                    |
| Esophageal cancer                           | Female | 15-19 years | 95+ years | 1         | Alcohol (liters per capita)                            |
| Esophageal cancer                           | Female | 15-19 years | 95+ years | 1         | Tobacco (cigarettes per capita)                        |
| Esophageal cancer                           | Female | 15-19 years | 95+ years | -1        | Education (years per capita)                           |
| Esophageal cancer                           | Female | 15-19 years | 95+ years | -1        | Fruits (kcal per capita)                               |
| Esophageal cancer                           | Female | 15-19 years | 95+ years | -1        | LDI (IS per capita)                                    |
| Esophageal cancer                           | Female | 15-19 years | 95+ years | 1         | Mean BMI                                               |
| Esophageal cancer                           | Female | 15-19 years | 95+ years | 1         | Indoor Air Pollution (All Cooking Fuels)               |
| Esophageal cancer                           | Female | 15-19 years | 95+ years | -1        | Sanitation (proportion with access)                    |
| Esophageal cancer                           | Female | 15-19 years | 95+ years | 1         | Smoking Prevalence                                     |



| Cause             | Sex    | Age start   | Age end   | Direction | Covariate                                              |
|-------------------|--------|-------------|-----------|-----------|--------------------------------------------------------|
| Esophageal cancer | Female | 15-19 years | 95+ years | -1        | Vegetables (kcal per capita)                           |
| Esophageal cancer | Female | 15-19 years | 95+ years | -1        | Improved Water Source (proportion with access)         |
| Esophageal cancer | Female | 15-19 years | 95+ years | 1         | Log-transformed age-standardized SEV scalar: Esophag C |
| Esophageal cancer | Female | 15-19 years | 95+ years | 0         | Socio-demographic Index                                |
| Esophageal cancer | Female | 15-19 years | 95+ years | -1        | Healthcare access and quality index                    |
| Esophageal cancer | Female | 15-19 years | 95+ years | 0         | LDI (IS per capita)                                    |
| Esophageal cancer | Female | 15-19 years | 95+ years | -1        | Socio-demographic Index                                |
| Esophageal cancer | Female | 15-19 years | 95+ years | -1        | fruits adjusted(g)                                     |
| Esophageal cancer | Female | 15-19 years | 95+ years | -1        | vegetables adjusted(g)                                 |
| Esophageal cancer | Male   | 15-19 years | 95+ years | 0         | LDI (IS per capita)                                    |
| Esophageal cancer | Male   | 15-19 years | 95+ years | 1         | Log-transformed SEV scalar: Esophag C                  |
| Esophageal cancer | Male   | 15-19 years | 95+ years | -1        | fruits adjusted(g)                                     |
| Esophageal cancer | Male   | 15-19 years | 95+ years | -1        | vegetables adjusted(g)                                 |
| Stomach cancer    | Male   | 15-19 years | 95+ years | 1         | Alcohol (liters per capita)                            |
| Stomach cancer    | Male   | 15-19 years | 95+ years | 1         | Tobacco (cigarettes per capita)                        |
| Stomach cancer    | Male   | 15-19 years | 95+ years | 1         | Cumulative Cigarettes (10 Years)                       |
| Stomach cancer    | Male   | 15-19 years | 95+ years | 1         | Cumulative Cigarettes (15 Years)                       |
| Stomach cancer    | Male   | 15-19 years | 95+ years | 0         | LDI (IS per capita)                                    |
| Stomach cancer    | Male   | 15-19 years | 95+ years | 1         | Mean BMI                                               |
| Stomach cancer    | Male   | 15-19 years | 95+ years | 1         | Indoor Air Pollution (All Cooking Fuels)               |
| Stomach cancer    | Male   | 15-19 years | 95+ years | 1         | Outdoor Air Pollution (PM2.5)                          |
| Stomach cancer    | Male   | 15-19 years | 95+ years | -1        | Sanitation (proportion with access)                    |
| Stomach cancer    | Male   | 15-19 years | 95+ years | 1         | Smoking Prevalence                                     |
| Stomach cancer    | Male   | 15-19 years | 95+ years | -1        | Improved Water Source (proportion with access)         |
| Stomach cancer    | Male   | 15-19 years | 95+ years | 1         | Log-transformed SEV scalar: Stomach C                  |
| Stomach cancer    | Male   | 15-19 years | 95+ years | 0         | Socio-demographic Index                                |
| Stomach cancer    | Male   | 15-19 years | 95+ years | -1        | fruits adjusted(g)                                     |
| Stomach cancer    | Male   | 15-19 years | 95+ years | -1        | vegetables adjusted(g)                                 |
| Stomach cancer    | Male   | 15-19 years | 95+ years | -1        | Healthcare access and quality index                    |
| Stomach cancer    | Male   | 15-19 years | 95+ years | 1         | Diet high in sodium                                    |
| Stomach cancer    | Female | 15-19 years | 95+ years | 1         | Alcohol (liters per capita)                            |
| Stomach cancer    | Female | 15-19 years | 95+ years | 1         | Tobacco (cigarettes per capita)                        |
| Stomach cancer    | Female | 15-19 years | 95+ years | 1         | Cumulative Cigarettes (10 Years)                       |
| Stomach cancer    | Female | 15-19 years | 95+ years | -1        | Education (years per capita)                           |
| Stomach cancer    | Female | 15-19 years | 95+ years | 0         | LDI (IS per capita)                                    |
| Stomach cancer    | Female | 15-19 years | 95+ years | 1         | Mean BMI                                               |
| Stomach cancer    | Female | 15-19 years | 95+ years | 1         | Indoor Air Pollution (All Cooking Fuels)               |
| Stomach cancer    | Female | 15-19 years | 95+ years | 1         | Outdoor Air Pollution (PM2.5)                          |
| Stomach cancer    | Female | 15-19 years | 95+ years | -1        | Sanitation (proportion with access)                    |
| Stomach cancer    | Female | 15-19 years | 95+ years | 1         | Smoking Prevalence                                     |
| Stomach cancer    | Female | 15-19 years | 95+ years | -1        | Improved Water Source (proportion with access)         |
| Stomach cancer    | Female | 15-19 years | 95+ years | 1         | Log-transformed SEV scalar: Stomach C                  |
| Stomach cancer    | Female | 15-19 years | 95+ years | 0         | Socio-demographic Index                                |
| Stomach cancer    | Female | 15-19 years | 95+ years | -1        | fruits adjusted(g)                                     |
| Stomach cancer    | Female | 15-19 years | 95+ years | -1        | vegetables adjusted(g)                                 |
| Stomach cancer    | Female | 15-19 years | 95+ years | -1        | Healthcare access and quality index                    |
| Stomach cancer    | Female | 15-19 years | 95+ years | 1         | Diet high in sodium                                    |
| Liver cancer      | Male   | 5-9 years   | 95+ years | 1         | Alcohol (liters per capita)                            |
| Liver cancer      | Male   | 5-9 years   | 95+ years | 1         | Tobacco (cigarettes per capita)                        |
| Liver cancer      | Male   | 5-9 years   | 95+ years | 1         | Cumulative Cigarettes (15 Years)                       |
| Liver cancer      | Male   | 5-9 years   | 95+ years | 1         | Cumulative Cigarettes (20 Years)                       |
| Liver cancer      | Male   | 5-9 years   | 95+ years | 1         | Diabetes Age-Standardized Prevalence (proportion)      |
| Liver cancer      | Male   | 5-9 years   | 95+ years | -1        | Education (years per capita)                           |
| Liver cancer      | Male   | 5-9 years   | 95+ years | 0         | LDI (IS per capita)                                    |
| Liver cancer      | Male   | 5-9 years   | 95+ years | 1         | Mean BMI                                               |
| Liver cancer      | Male   | 5-9 years   | 95+ years | 1         | Percent of total calories consumed as saturated fat    |
| Liver cancer      | Male   | 5-9 years   | 95+ years | 1         | Log-transformed SEV scalar: Liver C                    |
| Liver cancer      | Male   | 5-9 years   | 95+ years | 0         | Socio-demographic Index                                |
| Liver cancer      | Male   | 5-9 years   | 95+ years | 1         | red meats adjusted(g)                                  |
| Liver cancer      | Male   | 5-9 years   | 95+ years | 1         | Hepatitis B (HBsAg) Seroprevalence                     |
| Liver cancer      | Male   | 5-9 years   | 95+ years | 1         | Hepatitis C (IgG) Seroprevalence                       |
| Liver cancer      | Male   | 5-9 years   | 95+ years | -1        | Healthcare access and quality index                    |
| Liver cancer      | Female | 5-9 years   | 95+ years | 1         | Alcohol (liters per capita)                            |
| Liver cancer      | Female | 5-9 years   | 95+ years | 1         | Tobacco (cigarettes per capita)                        |
| Liver cancer      | Female | 5-9 years   | 95+ years | 1         | Cumulative Cigarettes (15 Years)                       |
| Liver cancer      | Female | 5-9 years   | 95+ years | 1         | Cumulative Cigarettes (20 Years)                       |
| Liver cancer      | Female | 5-9 years   | 95+ years | 1         | Diabetes Age-Standardized Prevalence (proportion)      |
| Liver cancer      | Female | 5-9 years   | 95+ years | -1        | Education (years per capita)                           |
| Liver cancer      | Female | 5-9 years   | 95+ years | 0         | LDI (IS per capita)                                    |
| Liver cancer      | Female | 5-9 years   | 95+ years | 1         | Mean BMI                                               |
| Liver cancer      | Female | 5-9 years   | 95+ years | 1         | Percent of total calories consumed as saturated fat    |
| Liver cancer      | Female | 5-9 years   | 95+ years | 1         | Log-transformed SEV scalar: Liver C                    |
| Liver cancer      | Female | 5-9 years   | 95+ years | 0         | Socio-demographic Index                                |
| Liver cancer      | Female | 5-9 years   | 95+ years | 1         | red meats adjusted(g)                                  |
| Liver cancer      | Female | 5-9 years   | 95+ years | 1         | Hepatitis B (HBsAg) Seroprevalence                     |
| Liver cancer      | Female | 5-9 years   | 95+ years | 1         | Hepatitis C (IgG) Seroprevalence                       |
| Liver cancer      | Female | 5-9 years   | 95+ years | -1        | Healthcare access and quality index                    |
| Larynx cancer     | Male   | 15-19 years | 95+ years | 1         | Alcohol (liters per capita)                            |
| Larynx cancer     | Male   | 15-19 years | 95+ years | 1         | Tobacco (cigarettes per capita)                        |
| Larynx cancer     | Male   | 15-19 years | 95+ years | 1         | Cumulative Cigarettes (10 Years)                       |
| Larynx cancer     | Male   | 15-19 years | 95+ years | 1         | Cumulative Cigarettes (15 Years)                       |
| Larynx cancer     | Male   | 15-19 years | 95+ years | 1         | Cumulative Cigarettes (20 Years)                       |
| Larynx cancer     | Male   | 15-19 years | 95+ years | 1         | Cumulative Cigarettes (5 Years)                        |
| Larynx cancer     | Male   | 15-19 years | 95+ years | -1        | Education (years per capita)                           |
| Larynx cancer     | Male   | 15-19 years | 95+ years | 0         | LDI (IS per capita)                                    |
| Larynx cancer     | Male   | 15-19 years | 95+ years | 1         | Population Density (over 1000 ppl/sqkm, proportion)    |
| Larynx cancer     | Male   | 15-19 years | 95+ years | 1         | Population Density (under 150 ppl/sqkm, proportion)    |
| Larynx cancer     | Male   | 15-19 years | 95+ years | 1         | Smoking Prevalence                                     |
| Larynx cancer     | Male   | 15-19 years | 95+ years | 1         | Log-transformed SEV scalar: Larynx C                   |
| Larynx cancer     | Male   | 15-19 years | 95+ years | 0         | Socio-demographic Index                                |
| Larynx cancer     | Male   | 15-19 years | 95+ years | -1        | fruits adjusted(g)                                     |
| Larynx cancer     | Male   | 15-19 years | 95+ years | -1        | vegetables adjusted(g)                                 |

| Cause                               | Sex    | Age start   | Age end   | Direction | Covariate                                           |
|-------------------------------------|--------|-------------|-----------|-----------|-----------------------------------------------------|
| Larynx cancer                       | Male   | 15-19 years | 95+ years | -1        | Healthcare access and quality index                 |
| Larynx cancer                       | Female | 15-19 years | 95+ years | 1         | Alcohol (liters per capita)                         |
| Larynx cancer                       | Female | 15-19 years | 95+ years | 1         | Tobacco (cigarettes per capita)                     |
| Larynx cancer                       | Female | 15-19 years | 95+ years | 1         | Cumulative Cigarettes (10 Years)                    |
| Larynx cancer                       | Female | 15-19 years | 95+ years | 1         | Cumulative Cigarettes (15 Years)                    |
| Larynx cancer                       | Female | 15-19 years | 95+ years | 1         | Cumulative Cigarettes (20 Years)                    |
| Larynx cancer                       | Female | 15-19 years | 95+ years | 1         | Cumulative Cigarettes (5 Years)                     |
| Larynx cancer                       | Female | 15-19 years | 95+ years | -1        | Education (years per capita)                        |
| Larynx cancer                       | Female | 15-19 years | 95+ years | 0         | LDI (IS per capita)                                 |
| Larynx cancer                       | Female | 15-19 years | 95+ years | 1         | Population Density (over 1000 ppl/sqkm, proportion) |
| Larynx cancer                       | Female | 15-19 years | 95+ years | 1         | Population Density (under 150 ppl/sqkm, proportion) |
| Larynx cancer                       | Female | 15-19 years | 95+ years | 1         | Smoking Prevalence                                  |
| Larynx cancer                       | Female | 15-19 years | 95+ years | 1         | Log-transformed SEV scalar: Larynx C                |
| Larynx cancer                       | Female | 15-19 years | 95+ years | 0         | Socio-demographic Index                             |
| Larynx cancer                       | Female | 15-19 years | 95+ years | -1        | fruits adjusted(g)                                  |
| Larynx cancer                       | Female | 15-19 years | 95+ years | -1        | vegetables adjusted(g)                              |
| Larynx cancer                       | Female | 15-19 years | 95+ years | -1        | Healthcare access and quality index                 |
| Tracheal, bronchus, and lung cancer | Female | 15-19 years | 95+ years | 1         | Tobacco (cigarettes per capita)                     |
| Tracheal, bronchus, and lung cancer | Female | 15-19 years | 95+ years | 1         | Cumulative Cigarettes (10 Years)                    |
| Tracheal, bronchus, and lung cancer | Female | 15-19 years | 95+ years | 1         | Cumulative Cigarettes (15 Years)                    |
| Tracheal, bronchus, and lung cancer | Female | 15-19 years | 95+ years | 1         | Cumulative Cigarettes (20 Years)                    |
| Tracheal, bronchus, and lung cancer | Female | 15-19 years | 95+ years | 1         | Cumulative Cigarettes (5 Years)                     |
| Tracheal, bronchus, and lung cancer | Female | 15-19 years | 95+ years | 0         | Education (years per capita)                        |
| Tracheal, bronchus, and lung cancer | Female | 15-19 years | 95+ years | 0         | LDI (IS per capita)                                 |
| Tracheal, bronchus, and lung cancer | Female | 15-19 years | 95+ years | 1         | Indoor Air Pollution (All Cooking Fuels)            |
| Tracheal, bronchus, and lung cancer | Female | 15-19 years | 95+ years | 1         | Outdoor Air Pollution (PM2.5)                       |
| Tracheal, bronchus, and lung cancer | Female | 15-19 years | 95+ years | 1         | Smoking Prevalence                                  |
| Tracheal, bronchus, and lung cancer | Female | 15-19 years | 95+ years | 1         | Log-transformed SEV scalar: Lung C                  |
| Tracheal, bronchus, and lung cancer | Female | 15-19 years | 95+ years | 1         | Log-transformed age-standardized SEV scalar: Lung C |
| Tracheal, bronchus, and lung cancer | Female | 15-19 years | 95+ years | 0         | Socio-demographic Index                             |
| Tracheal, bronchus, and lung cancer | Female | 15-19 years | 95+ years | -1        | Healthcare access and quality index                 |
| Tracheal, bronchus, and lung cancer | Male   | 15-19 years | 95+ years | 1         | Tobacco (cigarettes per capita)                     |
| Tracheal, bronchus, and lung cancer | Male   | 15-19 years | 95+ years | 1         | Cumulative Cigarettes (10 Years)                    |
| Tracheal, bronchus, and lung cancer | Male   | 15-19 years | 95+ years | 1         | Cumulative Cigarettes (15 Years)                    |
| Tracheal, bronchus, and lung cancer | Male   | 15-19 years | 95+ years | 1         | Cumulative Cigarettes (20 Years)                    |
| Tracheal, bronchus, and lung cancer | Male   | 15-19 years | 95+ years | 1         | Cumulative Cigarettes (5 Years)                     |
| Tracheal, bronchus, and lung cancer | Male   | 15-19 years | 95+ years | 0         | Education (years per capita)                        |
| Tracheal, bronchus, and lung cancer | Male   | 15-19 years | 95+ years | 0         | LDI (IS per capita)                                 |
| Tracheal, bronchus, and lung cancer | Male   | 15-19 years | 95+ years | 1         | Indoor Air Pollution (All Cooking Fuels)            |
| Tracheal, bronchus, and lung cancer | Male   | 15-19 years | 95+ years | 1         | Outdoor Air Pollution (PM2.5)                       |
| Tracheal, bronchus, and lung cancer | Male   | 15-19 years | 95+ years | 1         | Smoking Prevalence                                  |
| Tracheal, bronchus, and lung cancer | Male   | 15-19 years | 95+ years | 1         | Log-transformed SEV scalar: Lung C                  |
| Tracheal, bronchus, and lung cancer | Male   | 15-19 years | 95+ years | 1         | Log-transformed age-standardized SEV scalar: Lung C |
| Tracheal, bronchus, and lung cancer | Male   | 15-19 years | 95+ years | 0         | Socio-demographic Index                             |
| Tracheal, bronchus, and lung cancer | Male   | 15-19 years | 95+ years | -1        | Healthcare access and quality index                 |
| Breast cancer                       | Male   | 15-19 years | 95+ years | 1         | Alcohol (liters per capita)                         |
| Breast cancer                       | Male   | 15-19 years | 95+ years | 1         | Cumulative Cigarettes (10 Years)                    |
| Breast cancer                       | Male   | 15-19 years | 95+ years | -1        | Education (years per capita)                        |
| Breast cancer                       | Male   | 15-19 years | 95+ years | 1         | Saturated Fats (kcal per capita)                    |
| Breast cancer                       | Male   | 15-19 years | 95+ years | 0         | LDI (IS per capita)                                 |
| Breast cancer                       | Male   | 15-19 years | 95+ years | 1         | Mean BMI                                            |
| Breast cancer                       | Male   | 15-19 years | 95+ years | 1         | Log-transformed SEV scalar: Breast C                |
| Breast cancer                       | Male   | 15-19 years | 95+ years | 0         | Socio-demographic Index                             |
| Breast cancer                       | Male   | 15-19 years | 95+ years | -1        | fruits adjusted(g)                                  |
| Breast cancer                       | Male   | 15-19 years | 95+ years | -1        | vegetables adjusted(g)                              |
| Breast cancer                       | Male   | 15-19 years | 95+ years | -1        | Healthcare access and quality index                 |
| Breast cancer                       | Female | 15-19 years | 95+ years | 1         | Alcohol (liters per capita)                         |
| Breast cancer                       | Female | 15-19 years | 95+ years | -1        | Age-Specific Fertility Rate                         |
| Breast cancer                       | Female | 15-19 years | 95+ years | 1         | Cumulative Cigarettes (10 Years)                    |
| Breast cancer                       | Female | 15-19 years | 95+ years | -1        | Education (years per capita)                        |
| Breast cancer                       | Female | 15-19 years | 95+ years | 1         | Saturated Fats (kcal per capita)                    |
| Breast cancer                       | Female | 15-19 years | 95+ years | 0         | LDI (IS per capita)                                 |
| Breast cancer                       | Female | 15-19 years | 95+ years | 1         | Mean BMI                                            |
| Breast cancer                       | Female | 15-19 years | 95+ years | -1        | Total Fertility Rate                                |
| Breast cancer                       | Female | 15-19 years | 95+ years | 1         | Log-transformed SEV scalar: Breast C                |
| Breast cancer                       | Female | 15-19 years | 95+ years | 0         | Socio-demographic Index                             |
| Breast cancer                       | Female | 15-19 years | 95+ years | -1        | fruits adjusted(g)                                  |
| Breast cancer                       | Female | 15-19 years | 95+ years | -1        | vegetables adjusted(g)                              |
| Breast cancer                       | Female | 15-19 years | 95+ years | -1        | Healthcare access and quality index                 |
| Cervical cancer                     | Female | 15-19 years | 95+ years | 1         | Abortion On-Demand Illegal (binary)                 |
| Cervical cancer                     | Female | 15-19 years | 95+ years | 1         | Age-Specific Fertility Rate                         |
| Cervical cancer                     | Female | 15-19 years | 95+ years | 1         | Cumulative Cigarettes (10 Years)                    |
| Cervical cancer                     | Female | 15-19 years | 95+ years | 1         | Cumulative Cigarettes (15 Years)                    |
| Cervical cancer                     | Female | 15-19 years | 95+ years | 1         | Cumulative Cigarettes (5 Years)                     |
| Cervical cancer                     | Female | 15-19 years | 95+ years | -1        | Education (years per capita)                        |
| Cervical cancer                     | Female | 15-19 years | 95+ years | -1        | Health System Access 2 (unitless)                   |
| Cervical cancer                     | Female | 15-19 years | 95+ years | 0         | LDI (IS per capita)                                 |
| Cervical cancer                     | Female | 15-19 years | 95+ years | 1         | Smoking Prevalence                                  |
| Cervical cancer                     | Female | 15-19 years | 95+ years | 1         | Total Fertility Rate                                |
| Cervical cancer                     | Female | 15-19 years | 95+ years | 0         | Socio-demographic Index                             |
| Cervical cancer                     | Female | 15-19 years | 95+ years | -1        | fruits adjusted(g)                                  |
| Cervical cancer                     | Female | 15-19 years | 95+ years | -1        | vegetables adjusted(g)                              |
| Cervical cancer                     | Female | 15-19 years | 95+ years | 1         | HIV age-standardized prevalence                     |
| Cervical cancer                     | Female | 15-19 years | 95+ years | -1        | Healthcare access and quality index                 |
| Uterine cancer                      | Female | 15-19 years | 95+ years | 1         | Tobacco (cigarettes per capita)                     |
| Uterine cancer                      | Female | 15-19 years | 95+ years | 1         | Cumulative Cigarettes (10 Years)                    |
| Uterine cancer                      | Female | 15-19 years | 95+ years | 1         | Cumulative Cigarettes (5 Years)                     |
| Uterine cancer                      | Female | 15-19 years | 95+ years | 1         | Diabetes Age-Standardized Prevalence (proportion)   |
| Uterine cancer                      | Female | 15-19 years | 95+ years | -1        | Education (years per capita)                        |
| Uterine cancer                      | Female | 15-19 years | 95+ years | -1        | Health System Access (unitless)                     |
| Uterine cancer                      | Female | 15-19 years | 95+ years | 0         | LDI (IS per capita)                                 |
| Uterine cancer                      | Female | 15-19 years | 95+ years | 1         | Mean BMI                                            |

| Cause                      | Sex    | Age start   | Age end   | Direction | Covariate                                           |
|----------------------------|--------|-------------|-----------|-----------|-----------------------------------------------------|
| Uterine cancer             | Female | 15-19 years | 95+ years | 1         | Smoking Prevalence                                  |
| Uterine cancer             | Female | 15-19 years | 95+ years | 0         | Total Fertility Rate                                |
| Uterine cancer             | Female | 15-19 years | 95+ years | 1         | Log-transformed SEV scalar: Uterus C                |
| Uterine cancer             | Female | 15-19 years | 95+ years | 0         | Socio-demographic Index                             |
| Uterine cancer             | Female | 15-19 years | 95+ years | -1        | fruits adjusted(g)                                  |
| Uterine cancer             | Female | 15-19 years | 95+ years | -1        | vegetables adjusted(g)                              |
| Uterine cancer             | Female | 15-19 years | 95+ years | -1        | Healthcare access and quality index                 |
| Prostate cancer            | Male   | 15-19 years | 95+ years | 0         | Education (years per capita)                        |
| Prostate cancer            | Male   | 15-19 years | 95+ years | 0         | LDI (I\$ per capita)                                |
| Prostate cancer            | Male   | 15-19 years | 95+ years | 1         | Percent of total calories consumed as saturated fat |
| Prostate cancer            | Male   | 15-19 years | 95+ years | 1         | Log-transformed SEV scalar: Prostate C              |
| Prostate cancer            | Male   | 15-19 years | 95+ years | 0         | Socio-demographic Index                             |
| Prostate cancer            | Male   | 15-19 years | 95+ years | -1        | Healthcare access and quality index                 |
| Colon and rectum cancer    | Male   | 15-19 years | 95+ years | 1         | Alcohol (liters per capita)                         |
| Colon and rectum cancer    | Male   | 15-19 years | 95+ years | 1         | Tobacco (cigarettes per capita)                     |
| Colon and rectum cancer    | Male   | 15-19 years | 95+ years | 1         | Diabetes Age-Standardized Prevalence (proportion)   |
| Colon and rectum cancer    | Male   | 15-19 years | 95+ years | -1        | Education (years per capita)                        |
| Colon and rectum cancer    | Male   | 15-19 years | 95+ years | -1        | Health System Access 2 (unitless)                   |
| Colon and rectum cancer    | Male   | 15-19 years | 95+ years | 0         | LDI (I\$ per capita)                                |
| Colon and rectum cancer    | Male   | 15-19 years | 95+ years | 1         | Mean BMI                                            |
| Colon and rectum cancer    | Male   | 15-19 years | 95+ years | 1         | Smoking Prevalence                                  |
| Colon and rectum cancer    | Male   | 15-19 years | 95+ years | 1         | Log-transformed SEV scalar: Colorect C              |
| Colon and rectum cancer    | Male   | 15-19 years | 95+ years | 0         | Socio-demographic Index                             |
| Colon and rectum cancer    | Male   | 15-19 years | 95+ years | -1        | fruits adjusted(g)                                  |
| Colon and rectum cancer    | Male   | 15-19 years | 95+ years | -1        | milk adjusted(g)                                    |
| Colon and rectum cancer    | Male   | 15-19 years | 95+ years | -1        | nuts seeds adjusted(g)                              |
| Colon and rectum cancer    | Male   | 15-19 years | 95+ years | -1        | pufa adjusted(percent)                              |
| Colon and rectum cancer    | Male   | 15-19 years | 95+ years | 1         | red meats adjusted(g)                               |
| Colon and rectum cancer    | Male   | 15-19 years | 95+ years | -1        | vegetables adjusted(g)                              |
| Colon and rectum cancer    | Male   | 15-19 years | 95+ years | -1        | whole grains adjusted(g)                            |
| Colon and rectum cancer    | Male   | 15-19 years | 95+ years | -1        | Healthcare access and quality index                 |
| Colon and rectum cancer    | Female | 15-19 years | 95+ years | 1         | Alcohol (liters per capita)                         |
| Colon and rectum cancer    | Female | 15-19 years | 95+ years | 1         | Tobacco (cigarettes per capita)                     |
| Colon and rectum cancer    | Female | 15-19 years | 95+ years | 1         | Diabetes Age-Standardized Prevalence (proportion)   |
| Colon and rectum cancer    | Female | 15-19 years | 95+ years | -1        | Education (years per capita)                        |
| Colon and rectum cancer    | Female | 15-19 years | 95+ years | -1        | Health System Access 2 (unitless)                   |
| Colon and rectum cancer    | Female | 15-19 years | 95+ years | 0         | LDI (I\$ per capita)                                |
| Colon and rectum cancer    | Female | 15-19 years | 95+ years | 1         | Mean BMI                                            |
| Colon and rectum cancer    | Female | 15-19 years | 95+ years | 1         | Smoking Prevalence                                  |
| Colon and rectum cancer    | Female | 15-19 years | 95+ years | 1         | Log-transformed SEV scalar: Colorect C              |
| Colon and rectum cancer    | Female | 15-19 years | 95+ years | 0         | Socio-demographic Index                             |
| Colon and rectum cancer    | Female | 15-19 years | 95+ years | -1        | fruits adjusted(g)                                  |
| Colon and rectum cancer    | Female | 15-19 years | 95+ years | -1        | milk adjusted(g)                                    |
| Colon and rectum cancer    | Female | 15-19 years | 95+ years | -1        | nuts seeds adjusted(g)                              |
| Colon and rectum cancer    | Female | 15-19 years | 95+ years | -1        | pufa adjusted(percent)                              |
| Colon and rectum cancer    | Female | 15-19 years | 95+ years | 1         | red meats adjusted(g)                               |
| Colon and rectum cancer    | Female | 15-19 years | 95+ years | -1        | vegetables adjusted(g)                              |
| Colon and rectum cancer    | Female | 15-19 years | 95+ years | -1        | whole grains adjusted(g)                            |
| Colon and rectum cancer    | Female | 15-19 years | 95+ years | -1        | Healthcare access and quality index                 |
| Lip and oral cavity cancer | Male   | 15-19 years | 95+ years | 1         | Alcohol (liters per capita)                         |
| Lip and oral cavity cancer | Male   | 15-19 years | 95+ years | 1         | Tobacco (cigarettes per capita)                     |
| Lip and oral cavity cancer | Male   | 15-19 years | 95+ years | 1         | Cumulative Cigarettes (10 Years)                    |
| Lip and oral cavity cancer | Male   | 15-19 years | 95+ years | 1         | Cumulative Cigarettes (15 Years)                    |
| Lip and oral cavity cancer | Male   | 15-19 years | 95+ years | 1         | Cumulative Cigarettes (20 Years)                    |
| Lip and oral cavity cancer | Male   | 15-19 years | 95+ years | 1         | Cumulative Cigarettes (5 Years)                     |
| Lip and oral cavity cancer | Male   | 15-19 years | 95+ years | -1        | Education (years per capita)                        |
| Lip and oral cavity cancer | Male   | 15-19 years | 95+ years | -1        | Health System Access 2 (unitless)                   |
| Lip and oral cavity cancer | Male   | 15-19 years | 95+ years | 0         | LDI (I\$ per capita)                                |
| Lip and oral cavity cancer | Male   | 15-19 years | 95+ years | 1         | Smoking Prevalence                                  |
| Lip and oral cavity cancer | Male   | 15-19 years | 95+ years | 1         | Log-transformed SEV scalar: Mouth C                 |
| Lip and oral cavity cancer | Male   | 15-19 years | 95+ years | 0         | Socio-demographic Index                             |
| Lip and oral cavity cancer | Male   | 15-19 years | 95+ years | -1        | fruits adjusted(g)                                  |
| Lip and oral cavity cancer | Male   | 15-19 years | 95+ years | 1         | red meats adjusted(g)                               |
| Lip and oral cavity cancer | Male   | 15-19 years | 95+ years | -1        | vegetables adjusted(g)                              |
| Lip and oral cavity cancer | Male   | 15-19 years | 95+ years | -1        | Healthcare access and quality index                 |
| Lip and oral cavity cancer | Female | 15-19 years | 95+ years | 1         | Alcohol (liters per capita)                         |
| Lip and oral cavity cancer | Female | 15-19 years | 95+ years | 1         | Cumulative Cigarettes (10 Years)                    |
| Lip and oral cavity cancer | Female | 15-19 years | 95+ years | 1         | Cumulative Cigarettes (20 Years)                    |
| Lip and oral cavity cancer | Female | 15-19 years | 95+ years | -1        | Education (years per capita)                        |
| Lip and oral cavity cancer | Female | 15-19 years | 95+ years | -1        | Fruits (kcal per capita)                            |
| Lip and oral cavity cancer | Female | 15-19 years | 95+ years | -1        | Health System Access 2 (unitless)                   |
| Lip and oral cavity cancer | Female | 15-19 years | 95+ years | -1        | LDI (I\$ per capita)                                |
| Lip and oral cavity cancer | Female | 15-19 years | 95+ years | 1         | Red Meat (kcal per capita)                          |
| Lip and oral cavity cancer | Female | 15-19 years | 95+ years | 1         | Smoking Prevalence                                  |
| Lip and oral cavity cancer | Female | 15-19 years | 95+ years | -1        | Vegetables (kcal per capita)                        |
| Lip and oral cavity cancer | Female | 15-19 years | 95+ years | 0         | Socio-demographic Index                             |
| Lip and oral cavity cancer | Female | 15-19 years | 95+ years | -1        | Healthcare access and quality index                 |
| Nasopharynx cancer         | Female | 5-9 years   | 95+ years | 1         | Alcohol (liters per capita)                         |
| Nasopharynx cancer         | Female | 5-9 years   | 95+ years | 1         | Tobacco (cigarettes per capita)                     |
| Nasopharynx cancer         | Female | 5-9 years   | 95+ years | 1         | Cumulative Cigarettes (10 Years)                    |
| Nasopharynx cancer         | Female | 5-9 years   | 95+ years | 1         | Cumulative Cigarettes (15 Years)                    |
| Nasopharynx cancer         | Female | 5-9 years   | 95+ years | 1         | Cumulative Cigarettes (20 Years)                    |
| Nasopharynx cancer         | Female | 5-9 years   | 95+ years | 1         | Cumulative Cigarettes (5 Years)                     |
| Nasopharynx cancer         | Female | 5-9 years   | 95+ years | -1        | Education (years per capita)                        |
| Nasopharynx cancer         | Female | 5-9 years   | 95+ years | -1        | Health System Access 2 (unitless)                   |
| Nasopharynx cancer         | Female | 5-9 years   | 95+ years | 0         | LDI (I\$ per capita)                                |
| Nasopharynx cancer         | Female | 5-9 years   | 95+ years | 1         | Population Density (over 1000 ppl/sqkm, proportion) |
| Nasopharynx cancer         | Female | 5-9 years   | 95+ years | 1         | Population Density (under 150 ppl/sqkm, proportion) |
| Nasopharynx cancer         | Female | 5-9 years   | 95+ years | 1         | Smoking Prevalence                                  |
| Nasopharynx cancer         | Female | 5-9 years   | 95+ years | 1         | Log-transformed SEV scalar: Nasoph C                |
| Nasopharynx cancer         | Female | 5-9 years   | 95+ years | 0         | Socio-demographic Index                             |
| Nasopharynx cancer         | Female | 5-9 years   | 95+ years | -1        | fruits adjusted(g)                                  |

| Cause                                | Sex    | Age start   | Age end   | Direction | Covariate                                           |
|--------------------------------------|--------|-------------|-----------|-----------|-----------------------------------------------------|
| Nasopharynx cancer                   | Female | 5-9 years   | 95+ years | -1        | vegetables adjusted(g)                              |
| Nasopharynx cancer                   | Female | 5-9 years   | 95+ years | -1        | whole grains adjusted(g)                            |
| Nasopharynx cancer                   | Male   | 5-9 years   | 95+ years | 1         | Alcohol (liters per capita)                         |
| Nasopharynx cancer                   | Male   | 5-9 years   | 95+ years | 1         | Tobacco (cigarettes per capita)                     |
| Nasopharynx cancer                   | Male   | 5-9 years   | 95+ years | 1         | Cumulative Cigarettes (10 Years)                    |
| Nasopharynx cancer                   | Male   | 5-9 years   | 95+ years | 1         | Cumulative Cigarettes (15 Years)                    |
| Nasopharynx cancer                   | Male   | 5-9 years   | 95+ years | 1         | Cumulative Cigarettes (20 Years)                    |
| Nasopharynx cancer                   | Male   | 5-9 years   | 95+ years | 1         | Cumulative Cigarettes (5 Years)                     |
| Nasopharynx cancer                   | Male   | 5-9 years   | 95+ years | -1        | Education (years per capita)                        |
| Nasopharynx cancer                   | Male   | 5-9 years   | 95+ years | -1        | Health System Access 2 (unitless)                   |
| Nasopharynx cancer                   | Male   | 5-9 years   | 95+ years | 0         | LDI (I\$ per capita)                                |
| Nasopharynx cancer                   | Male   | 5-9 years   | 95+ years | 1         | Population Density (over 1000 ppl/sqkm, proportion) |
| Nasopharynx cancer                   | Male   | 5-9 years   | 95+ years | 1         | Population Density (under 150 ppl/sqkm, proportion) |
| Nasopharynx cancer                   | Male   | 5-9 years   | 95+ years | 1         | Smoking Prevalence                                  |
| Nasopharynx cancer                   | Male   | 5-9 years   | 95+ years | 1         | Log-transformed SEV scalar: Nasoph C                |
| Nasopharynx cancer                   | Male   | 5-9 years   | 95+ years | 0         | Socio-demographic Index                             |
| Nasopharynx cancer                   | Male   | 5-9 years   | 95+ years | -1        | fruits adjusted(g)                                  |
| Nasopharynx cancer                   | Male   | 5-9 years   | 95+ years | -1        | vegetables adjusted(g)                              |
| Nasopharynx cancer                   | Male   | 5-9 years   | 95+ years | -1        | whole grains adjusted(g)                            |
| Other pharynx cancer                 | Male   | 15-19 years | 95+ years | 1         | Alcohol (liters per capita)                         |
| Other pharynx cancer                 | Male   | 15-19 years | 95+ years | 1         | Cumulative Cigarettes (5 Years)                     |
| Other pharynx cancer                 | Male   | 15-19 years | 95+ years | -1        | Education (years per capita)                        |
| Other pharynx cancer                 | Male   | 15-19 years | 95+ years | 0         | LDI (I\$ per capita)                                |
| Other pharynx cancer                 | Male   | 15-19 years | 95+ years | 1         | Population Density (over 1000 ppl/sqkm, proportion) |
| Other pharynx cancer                 | Male   | 15-19 years | 95+ years | 1         | Population Density (under 150 ppl/sqkm, proportion) |
| Other pharynx cancer                 | Male   | 15-19 years | 95+ years | 1         | Smoking Prevalence                                  |
| Other pharynx cancer                 | Male   | 15-19 years | 95+ years | -1        | Health System Access (capped)                       |
| Other pharynx cancer                 | Male   | 15-19 years | 95+ years | 1         | Log-transformed SEV scalar: Oth Phar C              |
| Other pharynx cancer                 | Male   | 15-19 years | 95+ years | 0         | Socio-demographic Index                             |
| Other pharynx cancer                 | Male   | 15-19 years | 95+ years | -1        | fruits adjusted(g)                                  |
| Other pharynx cancer                 | Male   | 15-19 years | 95+ years | -1        | vegetables adjusted(g)                              |
| Other pharynx cancer                 | Male   | 15-19 years | 95+ years | -1        | whole grains adjusted(g)                            |
| Other pharynx cancer                 | Female | 15-19 years | 95+ years | 1         | Alcohol (liters per capita)                         |
| Other pharynx cancer                 | Female | 15-19 years | 95+ years | 1         | Cumulative Cigarettes (5 Years)                     |
| Other pharynx cancer                 | Female | 15-19 years | 95+ years | -1        | Education (years per capita)                        |
| Other pharynx cancer                 | Female | 15-19 years | 95+ years | 0         | LDI (I\$ per capita)                                |
| Other pharynx cancer                 | Female | 15-19 years | 95+ years | 1         | Population Density (over 1000 ppl/sqkm, proportion) |
| Other pharynx cancer                 | Female | 15-19 years | 95+ years | 1         | Population Density (under 150 ppl/sqkm, proportion) |
| Other pharynx cancer                 | Female | 15-19 years | 95+ years | 1         | Smoking Prevalence                                  |
| Other pharynx cancer                 | Female | 15-19 years | 95+ years | -1        | Health System Access (capped)                       |
| Other pharynx cancer                 | Female | 15-19 years | 95+ years | 1         | Log-transformed SEV scalar: Oth Phar C              |
| Other pharynx cancer                 | Female | 15-19 years | 95+ years | 0         | Socio-demographic Index                             |
| Other pharynx cancer                 | Female | 15-19 years | 95+ years | -1        | fruits adjusted(g)                                  |
| Other pharynx cancer                 | Female | 15-19 years | 95+ years | -1        | vegetables adjusted(g)                              |
| Other pharynx cancer                 | Female | 15-19 years | 95+ years | -1        | whole grains adjusted(g)                            |
| Gallbladder and biliary tract cancer | Female | 15-19 years | 95+ years | 1         | Alcohol (liters per capita)                         |
| Gallbladder and biliary tract cancer | Female | 15-19 years | 95+ years | 1         | Tobacco (cigarettes per capita)                     |
| Gallbladder and biliary tract cancer | Female | 15-19 years | 95+ years | 1         | Cumulative Cigarettes (10 Years)                    |
| Gallbladder and biliary tract cancer | Female | 15-19 years | 95+ years | 1         | Cumulative Cigarettes (5 Years)                     |
| Gallbladder and biliary tract cancer | Female | 15-19 years | 95+ years | 1         | Diabetes Age-Standardized Prevalence (proportion)   |
| Gallbladder and biliary tract cancer | Female | 15-19 years | 95+ years | -1        | Education (years per capita)                        |
| Gallbladder and biliary tract cancer | Female | 15-19 years | 95+ years | 1         | Health System Access 2 (unitless)                   |
| Gallbladder and biliary tract cancer | Female | 15-19 years | 95+ years | 0         | LDI (I\$ per capita)                                |
| Gallbladder and biliary tract cancer | Female | 15-19 years | 95+ years | 1         | Mean BMI                                            |
| Gallbladder and biliary tract cancer | Female | 15-19 years | 95+ years | 1         | Smoking Prevalence                                  |
| Gallbladder and biliary tract cancer | Female | 15-19 years | 95+ years | 1         | Log-transformed SEV scalar: Gallblad C              |
| Gallbladder and biliary tract cancer | Female | 15-19 years | 95+ years | 0         | Socio-demographic Index                             |
| Gallbladder and biliary tract cancer | Female | 15-19 years | 95+ years | -1        | fruits adjusted(g)                                  |
| Gallbladder and biliary tract cancer | Female | 15-19 years | 95+ years | -1        | vegetables adjusted(g)                              |
| Gallbladder and biliary tract cancer | Female | 15-19 years | 95+ years | -1        | Healthcare access and quality index                 |
| Gallbladder and biliary tract cancer | Female | 15-19 years | 95+ years | -1        | Health System Access (capped)                       |
| Gallbladder and biliary tract cancer | Male   | 15-19 years | 95+ years | 1         | Alcohol (liters per capita)                         |
| Gallbladder and biliary tract cancer | Male   | 15-19 years | 95+ years | 1         | Tobacco (cigarettes per capita)                     |
| Gallbladder and biliary tract cancer | Male   | 15-19 years | 95+ years | 1         | Cumulative Cigarettes (10 Years)                    |
| Gallbladder and biliary tract cancer | Male   | 15-19 years | 95+ years | 1         | Cumulative Cigarettes (5 Years)                     |
| Gallbladder and biliary tract cancer | Male   | 15-19 years | 95+ years | 1         | Diabetes Age-Standardized Prevalence (proportion)   |
| Gallbladder and biliary tract cancer | Male   | 15-19 years | 95+ years | -1        | Education (years per capita)                        |
| Gallbladder and biliary tract cancer | Male   | 15-19 years | 95+ years | 0         | LDI (I\$ per capita)                                |
| Gallbladder and biliary tract cancer | Male   | 15-19 years | 95+ years | 1         | Mean BMI                                            |
| Gallbladder and biliary tract cancer | Male   | 15-19 years | 95+ years | 1         | Smoking Prevalence                                  |
| Gallbladder and biliary tract cancer | Male   | 15-19 years | 95+ years | -1        | Health System Access (capped)                       |
| Gallbladder and biliary tract cancer | Male   | 15-19 years | 95+ years | 1         | Log-transformed SEV scalar: Gallblad C              |
| Gallbladder and biliary tract cancer | Male   | 15-19 years | 95+ years | 0         | Socio-demographic Index                             |
| Gallbladder and biliary tract cancer | Male   | 15-19 years | 95+ years | -1        | fruits adjusted(g)                                  |
| Gallbladder and biliary tract cancer | Male   | 15-19 years | 95+ years | -1        | vegetables adjusted(g)                              |
| Gallbladder and biliary tract cancer | Male   | 15-19 years | 95+ years | -1        | Healthcare access and quality index                 |
| Pancreatic cancer                    | Male   | 15-19 years | 95+ years | 1         | Alcohol (liters per capita)                         |
| Pancreatic cancer                    | Male   | 15-19 years | 95+ years | 1         | Tobacco (cigarettes per capita)                     |
| Pancreatic cancer                    | Male   | 15-19 years | 95+ years | 1         | Cumulative Cigarettes (10 Years)                    |
| Pancreatic cancer                    | Male   | 15-19 years | 95+ years | 1         | Cumulative Cigarettes (20 Years)                    |
| Pancreatic cancer                    | Male   | 15-19 years | 95+ years | 1         | Cumulative Cigarettes (5 Years)                     |
| Pancreatic cancer                    | Male   | 15-19 years | 95+ years | 1         | Diabetes Age-Standardized Prevalence (proportion)   |
| Pancreatic cancer                    | Male   | 15-19 years | 95+ years | -1        | Education (years per capita)                        |
| Pancreatic cancer                    | Male   | 15-19 years | 95+ years | 0         | LDI (I\$ per capita)                                |
| Pancreatic cancer                    | Male   | 15-19 years | 95+ years | 1         | Mean BMI                                            |
| Pancreatic cancer                    | Male   | 15-19 years | 95+ years | 1         | Percent of total calories consumed as saturated fat |
| Pancreatic cancer                    | Male   | 15-19 years | 95+ years | 1         | Smoking Prevalence                                  |
| Pancreatic cancer                    | Male   | 15-19 years | 95+ years | 1         | Total Calories (kcal per capita)                    |
| Pancreatic cancer                    | Male   | 15-19 years | 95+ years | 1         | Log-transformed SEV scalar: Pancreas C              |
| Pancreatic cancer                    | Male   | 15-19 years | 95+ years | 0         | Socio-demographic Index                             |
| Pancreatic cancer                    | Male   | 15-19 years | 95+ years | -1        | fruits adjusted(g)                                  |
| Pancreatic cancer                    | Male   | 15-19 years | 95+ years | 1         | red meats adjusted(g)                               |

| Cause                    | Sex    | Age start   | Age end   | Direction | Covariate                                           |
|--------------------------|--------|-------------|-----------|-----------|-----------------------------------------------------|
| Pancreatic cancer        | Male   | 15-19 years | 95+ years | -1        | vegetables adjusted(g)                              |
| Pancreatic cancer        | Male   | 15-19 years | 95+ years | -1        | Healthcare access and quality index                 |
| Pancreatic cancer        | Female | 15-19 years | 95+ years | 1         | Alcohol (liters per capita)                         |
| Pancreatic cancer        | Female | 15-19 years | 95+ years | 1         | Tobacco (cigarettes per capita)                     |
| Pancreatic cancer        | Female | 15-19 years | 95+ years | 1         | Cumulative Cigarettes (10 Years)                    |
| Pancreatic cancer        | Female | 15-19 years | 95+ years | 1         | Cumulative Cigarettes (20 Years)                    |
| Pancreatic cancer        | Female | 15-19 years | 95+ years | 1         | Cumulative Cigarettes (5 Years)                     |
| Pancreatic cancer        | Female | 15-19 years | 95+ years | 1         | Diabetes Age-Standardized Prevalence (proportion)   |
| Pancreatic cancer        | Female | 15-19 years | 95+ years | -1        | Education (years per capita)                        |
| Pancreatic cancer        | Female | 15-19 years | 95+ years | 0         | LDI (I\$ per capita)                                |
| Pancreatic cancer        | Female | 15-19 years | 95+ years | 1         | Mean BMI                                            |
| Pancreatic cancer        | Female | 15-19 years | 95+ years | 1         | Percent of total calories consumed as saturated fat |
| Pancreatic cancer        | Female | 15-19 years | 95+ years | 1         | Smoking Prevalence                                  |
| Pancreatic cancer        | Female | 15-19 years | 95+ years | 1         | Log-transformed SEV scalar: Pancreas C              |
| Pancreatic cancer        | Female | 15-19 years | 95+ years | 0         | Socio-demographic Index                             |
| Pancreatic cancer        | Female | 15-19 years | 95+ years | -1        | fruits adjusted(g)                                  |
| Pancreatic cancer        | Female | 15-19 years | 95+ years | 1         | red meats adjusted(g)                               |
| Pancreatic cancer        | Female | 15-19 years | 95+ years | -1        | vegetables adjusted(g)                              |
| Pancreatic cancer        | Female | 15-19 years | 95+ years | 1         | energy unadjusted(kcal)                             |
| Pancreatic cancer        | Female | 15-19 years | 95+ years | -1        | Healthcare access and quality index                 |
| Pancreatic cancer        | Male   | 15-19 years | 95+ years | 1         | energy unadjusted(kcal)                             |
| Pancreatic cancer        | Female | 15-19 years | 95+ years | 1         | vegetables adjusted(g)                              |
| Pancreatic cancer        | Female | 15-19 years | 95+ years | -1        | vegetables unadjusted(g)                            |
| Malignant skin melanoma  | Male   | 15-19 years | 95+ years | 1         | Alcohol (liters per capita)                         |
| Malignant skin melanoma  | Male   | 15-19 years | 95+ years | -1        | Education (years per capita)                        |
| Malignant skin melanoma  | Male   | 15-19 years | 95+ years | 0         | LDI (I\$ per capita)                                |
| Malignant skin melanoma  | Male   | 15-19 years | 95+ years | 0         | Latitude Under 15 (proportion)                      |
| Malignant skin melanoma  | Male   | 15-19 years | 95+ years | 0         | Latitude 15 to 30 (proportion)                      |
| Malignant skin melanoma  | Male   | 15-19 years | 95+ years | -1        | Latitude 30 to 45 (proportion)                      |
| Malignant skin melanoma  | Male   | 15-19 years | 95+ years | -1        | Latitude Over 45 (proportion)                       |
| Malignant skin melanoma  | Male   | 15-19 years | 95+ years | 0         | Socio-demographic Index                             |
| Malignant skin melanoma  | Male   | 15-19 years | 95+ years | -1        | fruits adjusted(g)                                  |
| Malignant skin melanoma  | Male   | 15-19 years | 95+ years | -1        | vegetables adjusted(g)                              |
| Malignant skin melanoma  | Male   | 15-19 years | 95+ years | -1        | Healthcare access and quality index                 |
| Malignant skin melanoma  | Female | 15-19 years | 95+ years | 1         | Alcohol (liters per capita)                         |
| Malignant skin melanoma  | Female | 15-19 years | 95+ years | -1        | Education (years per capita)                        |
| Malignant skin melanoma  | Female | 15-19 years | 95+ years | 0         | LDI (I\$ per capita)                                |
| Malignant skin melanoma  | Female | 15-19 years | 95+ years | 0         | Latitude Under 15 (proportion)                      |
| Malignant skin melanoma  | Female | 15-19 years | 95+ years | 0         | Latitude 15 to 30 (proportion)                      |
| Malignant skin melanoma  | Female | 15-19 years | 95+ years | -1        | Latitude 30 to 45 (proportion)                      |
| Malignant skin melanoma  | Female | 15-19 years | 95+ years | -1        | Latitude Over 45 (proportion)                       |
| Malignant skin melanoma  | Female | 15-19 years | 95+ years | 0         | Socio-demographic Index                             |
| Malignant skin melanoma  | Female | 15-19 years | 95+ years | -1        | fruits adjusted(g)                                  |
| Malignant skin melanoma  | Female | 15-19 years | 95+ years | -1        | vegetables adjusted(g)                              |
| Malignant skin melanoma  | Female | 15-19 years | 95+ years | -1        | Healthcare access and quality index                 |
| Non-melanoma skin cancer | Male   | 15-19 years | 95+ years | 1         | Cumulative Cigarettes (10 Years)                    |
| Non-melanoma skin cancer | Male   | 15-19 years | 95+ years | 1         | Cumulative Cigarettes (15 Years)                    |
| Non-melanoma skin cancer | Male   | 15-19 years | 95+ years | 1         | Cumulative Cigarettes (5 Years)                     |
| Non-melanoma skin cancer | Male   | 15-19 years | 95+ years | -1        | Education (years per capita)                        |
| Non-melanoma skin cancer | Male   | 15-19 years | 95+ years | 0         | Average latitude                                    |
| Non-melanoma skin cancer | Male   | 15-19 years | 95+ years | 0         | LDI (I\$ per capita)                                |
| Non-melanoma skin cancer | Male   | 15-19 years | 95+ years | 1         | Smoking Prevalence                                  |
| Non-melanoma skin cancer | Male   | 15-19 years | 95+ years | 0         | Socio-demographic Index                             |
| Non-melanoma skin cancer | Male   | 15-19 years | 95+ years | -1        | Healthcare access and quality index                 |
| Non-melanoma skin cancer | Male   | 15-19 years | 95+ years | -1        | Health System Access (capped)                       |
| Non-melanoma skin cancer | Female | 15-19 years | 95+ years | 1         | Cumulative Cigarettes (10 Years)                    |
| Non-melanoma skin cancer | Female | 15-19 years | 95+ years | 1         | Cumulative Cigarettes (15 Years)                    |
| Non-melanoma skin cancer | Female | 15-19 years | 95+ years | 1         | Cumulative Cigarettes (5 Years)                     |
| Non-melanoma skin cancer | Female | 15-19 years | 95+ years | -1        | Education (years per capita)                        |
| Non-melanoma skin cancer | Female | 15-19 years | 95+ years | 0         | Average latitude                                    |
| Non-melanoma skin cancer | Female | 15-19 years | 95+ years | 0         | LDI (I\$ per capita)                                |
| Non-melanoma skin cancer | Female | 15-19 years | 95+ years | 1         | Smoking Prevalence                                  |
| Non-melanoma skin cancer | Female | 15-19 years | 95+ years | 0         | Socio-demographic Index                             |
| Non-melanoma skin cancer | Female | 15-19 years | 95+ years | -1        | Healthcare access and quality index                 |
| Non-melanoma skin cancer | Female | 15-19 years | 95+ years | -1        | Health System Access (capped)                       |
| Ovarian cancer           | Female | 15-19 years | 95+ years | 1         | Alcohol (liters per capita)                         |
| Ovarian cancer           | Female | 15-19 years | 95+ years | 1         | Tobacco (cigarettes per capita)                     |
| Ovarian cancer           | Female | 15-19 years | 95+ years | -1        | Contraception (Modern) Prevalence (proportion)      |
| Ovarian cancer           | Female | 15-19 years | 95+ years | 1         | Cumulative Cigarettes (20 Years)                    |
| Ovarian cancer           | Female | 15-19 years | 95+ years | 1         | Diabetes Age-Standardized Prevalence (proportion)   |
| Ovarian cancer           | Female | 15-19 years | 95+ years | -1        | Education (years per capita)                        |
| Ovarian cancer           | Female | 15-19 years | 95+ years | 0         | LDI (I\$ per capita)                                |
| Ovarian cancer           | Female | 15-19 years | 95+ years | 1         | Mean BMI                                            |
| Ovarian cancer           | Female | 15-19 years | 95+ years | 1         | Percent of total calories consumed as saturated fat |
| Ovarian cancer           | Female | 15-19 years | 95+ years | 1         | Smoking Prevalence                                  |
| Ovarian cancer           | Female | 15-19 years | 95+ years | 0         | Total Fertility Rate                                |
| Ovarian cancer           | Female | 15-19 years | 95+ years | 1         | Log-transformed SEV scalar: Ovary C                 |
| Ovarian cancer           | Female | 15-19 years | 95+ years | 0         | Socio-demographic Index                             |
| Ovarian cancer           | Female | 15-19 years | 95+ years | -1        | fruits adjusted(g)                                  |
| Ovarian cancer           | Female | 15-19 years | 95+ years | -1        | vegetables adjusted(g)                              |
| Ovarian cancer           | Female | 15-19 years | 95+ years | 1         | energy unadjusted(kcal)                             |
| Ovarian cancer           | Female | 15-19 years | 95+ years | -1        | Healthcare access and quality index                 |
| Testicular cancer        | Male   | 15-19 years | 95+ years | 1         | Cumulative Cigarettes (10 Years)                    |
| Testicular cancer        | Male   | 15-19 years | 95+ years | 1         | Cumulative Cigarettes (15 Years)                    |
| Testicular cancer        | Male   | 15-19 years | 95+ years | 1         | Cumulative Cigarettes (5 Years)                     |
| Testicular cancer        | Male   | 15-19 years | 95+ years | -1        | Education (years per capita)                        |
| Testicular cancer        | Male   | 15-19 years | 95+ years | -1        | Fruits (kcal per capita)                            |
| Testicular cancer        | Male   | 15-19 years | 95+ years | -1        | Health System Access 2 (unitless)                   |
| Testicular cancer        | Male   | 15-19 years | 95+ years | -1        | LDI (I\$ per capita)                                |
| Testicular cancer        | Male   | 15-19 years | 95+ years | -1        | Vegetables (kcal per capita)                        |
| Testicular cancer        | Male   | 15-19 years | 95+ years | 0         | Socio-demographic Index                             |
| Testicular cancer        | Male   | 15-19 years | 95+ years | -1        | Healthcare access and quality index                 |

| Cause                           | Sex    | Age start   | Age end   | Direction | Covariate                                           |
|---------------------------------|--------|-------------|-----------|-----------|-----------------------------------------------------|
| Kidney cancer                   | Male   | 0-6 days    | 95+ years | 1         | Alcohol (liters per capita)                         |
| Kidney cancer                   | Male   | 0-6 days    | 95+ years | 1         | Cumulative Cigarettes (10 Years)                    |
| Kidney cancer                   | Male   | 0-6 days    | 95+ years | 1         | Cumulative Cigarettes (15 Years)                    |
| Kidney cancer                   | Male   | 0-6 days    | 95+ years | 1         | Cumulative Cigarettes (5 Years)                     |
| Kidney cancer                   | Male   | 0-6 days    | 95+ years | 1         | Diabetes Age-Standardized Prevalence (proportion)   |
| Kidney cancer                   | Male   | 0-6 days    | 95+ years | -1        | Education (years per capita)                        |
| Kidney cancer                   | Male   | 0-6 days    | 95+ years | -1        | Health System Access 2 (unitless)                   |
| Kidney cancer                   | Male   | 0-6 days    | 95+ years | 0         | LDI (I\$ per capita)                                |
| Kidney cancer                   | Male   | 0-6 days    | 95+ years | 1         | Mean BMI                                            |
| Kidney cancer                   | Male   | 0-6 days    | 95+ years | 1         | Systolic Blood Pressure (mmHg)                      |
| Kidney cancer                   | Male   | 0-6 days    | 95+ years | 1         | Smoking Prevalence                                  |
| Kidney cancer                   | Male   | 0-6 days    | 95+ years | 1         | Log-transformed SEV scalar: Kidney C                |
| Kidney cancer                   | Male   | 0-6 days    | 95+ years | 0         | Socio-demographic Index                             |
| Kidney cancer                   | Female | 0-6 days    | 95+ years | 1         | Alcohol (liters per capita)                         |
| Kidney cancer                   | Female | 0-6 days    | 95+ years | 1         | Cumulative Cigarettes (10 Years)                    |
| Kidney cancer                   | Female | 0-6 days    | 95+ years | 1         | Cumulative Cigarettes (15 Years)                    |
| Kidney cancer                   | Female | 0-6 days    | 95+ years | 1         | Cumulative Cigarettes (5 Years)                     |
| Kidney cancer                   | Female | 0-6 days    | 95+ years | 1         | Diabetes Age-Standardized Prevalence (proportion)   |
| Kidney cancer                   | Female | 0-6 days    | 95+ years | -1        | Education (years per capita)                        |
| Kidney cancer                   | Female | 0-6 days    | 95+ years | -1        | Health System Access 2 (unitless)                   |
| Kidney cancer                   | Female | 0-6 days    | 95+ years | -1        | LDI (I\$ per capita)                                |
| Kidney cancer                   | Female | 0-6 days    | 95+ years | 1         | Mean BMI                                            |
| Kidney cancer                   | Female | 0-6 days    | 95+ years | 1         | Systolic Blood Pressure (mmHg)                      |
| Kidney cancer                   | Female | 0-6 days    | 95+ years | 1         | Smoking Prevalence                                  |
| Kidney cancer                   | Female | 0-6 days    | 95+ years | 0         | Total Fertility Rate                                |
| Kidney cancer                   | Female | 0-6 days    | 95+ years | 1         | Total Calories (kcal per capita)                    |
| Kidney cancer                   | Female | 0-6 days    | 95+ years | 1         | Log-transformed SEV scalar: Kidney C                |
| Kidney cancer                   | Female | 0-6 days    | 95+ years | 1         | Socio-demographic Index                             |
| Kidney cancer                   | Female | 0-6 days    | 95+ years | 0         | LDI (I\$ per capita)                                |
| Kidney cancer                   | Female | 0-6 days    | 95+ years | 0         | Socio-demographic Index                             |
| Bladder cancer                  | Male   | 15-19 years | 95+ years | 1         | Alcohol (liters per capita)                         |
| Bladder cancer                  | Male   | 15-19 years | 95+ years | 1         | Cumulative Cigarettes (10 Years)                    |
| Bladder cancer                  | Male   | 15-19 years | 95+ years | 1         | Cumulative Cigarettes (15 Years)                    |
| Bladder cancer                  | Male   | 15-19 years | 95+ years | 1         | Cumulative Cigarettes (5 Years)                     |
| Bladder cancer                  | Male   | 15-19 years | 95+ years | -1        | Education (years per capita)                        |
| Bladder cancer                  | Male   | 15-19 years | 95+ years | 0         | LDI (I\$ per capita)                                |
| Bladder cancer                  | Male   | 15-19 years | 95+ years | 1         | Population Density (over 1000 ppl/sqkm, proportion) |
| Bladder cancer                  | Male   | 15-19 years | 95+ years | 1         | Population Density (under 150 ppl/sqkm, proportion) |
| Bladder cancer                  | Male   | 15-19 years | 95+ years | 1         | Smoking Prevalence                                  |
| Bladder cancer                  | Male   | 15-19 years | 95+ years | 1         | Log-transformed SEV scalar: Bladder C               |
| Bladder cancer                  | Male   | 15-19 years | 95+ years | 0         | Socio-demographic Index                             |
| Bladder cancer                  | Male   | 15-19 years | 95+ years | -1        | fruits adjusted(g)                                  |
| Bladder cancer                  | Male   | 15-19 years | 95+ years | -1        | vegetables adjusted(g)                              |
| Bladder cancer                  | Male   | 15-19 years | 95+ years | -1        | Healthcare access and quality index                 |
| Bladder cancer                  | Female | 15-19 years | 95+ years | 1         | Alcohol (liters per capita)                         |
| Bladder cancer                  | Female | 15-19 years | 95+ years | 1         | Cumulative Cigarettes (10 Years)                    |
| Bladder cancer                  | Female | 15-19 years | 95+ years | 1         | Cumulative Cigarettes (15 Years)                    |
| Bladder cancer                  | Female | 15-19 years | 95+ years | 1         | Cumulative Cigarettes (5 Years)                     |
| Bladder cancer                  | Female | 15-19 years | 95+ years | -1        | Education (years per capita)                        |
| Bladder cancer                  | Female | 15-19 years | 95+ years | 0         | LDI (I\$ per capita)                                |
| Bladder cancer                  | Female | 15-19 years | 95+ years | 1         | Population Density (over 1000 ppl/sqkm, proportion) |
| Bladder cancer                  | Female | 15-19 years | 95+ years | 1         | Population Density (under 150 ppl/sqkm, proportion) |
| Bladder cancer                  | Female | 15-19 years | 95+ years | 1         | Smoking Prevalence                                  |
| Bladder cancer                  | Female | 15-19 years | 95+ years | 1         | Log-transformed SEV scalar: Bladder C               |
| Bladder cancer                  | Female | 15-19 years | 95+ years | 0         | Socio-demographic Index                             |
| Bladder cancer                  | Female | 15-19 years | 95+ years | -1        | fruits adjusted(g)                                  |
| Bladder cancer                  | Female | 15-19 years | 95+ years | -1        | vegetables adjusted(g)                              |
| Bladder cancer                  | Female | 15-19 years | 95+ years | -1        | Healthcare access and quality index                 |
| Brain and nervous system cancer | Female | 0-6 days    | 95+ years | 1         | Alcohol (liters per capita)                         |
| Brain and nervous system cancer | Female | 0-6 days    | 95+ years | 1         | Cumulative Cigarettes (10 Years)                    |
| Brain and nervous system cancer | Female | 0-6 days    | 95+ years | 1         | Cumulative Cigarettes (15 Years)                    |
| Brain and nervous system cancer | Female | 0-6 days    | 95+ years | -1        | Education (years per capita)                        |
| Brain and nervous system cancer | Female | 0-6 days    | 95+ years | 0         | LDI (I\$ per capita)                                |
| Brain and nervous system cancer | Female | 0-6 days    | 95+ years | 1         | Cholesterol (total, mean per capita)                |
| Brain and nervous system cancer | Female | 0-6 days    | 95+ years | 1         | Systolic Blood Pressure (mmHg)                      |
| Brain and nervous system cancer | Female | 0-6 days    | 95+ years | 1         | Percent of total calories consumed as saturated fat |
| Brain and nervous system cancer | Female | 0-6 days    | 95+ years | 1         | Smoking Prevalence                                  |
| Brain and nervous system cancer | Female | 0-6 days    | 95+ years | 0         | Socio-demographic Index                             |
| Brain and nervous system cancer | Female | 0-6 days    | 95+ years | -1        | fruits adjusted(g)                                  |
| Brain and nervous system cancer | Female | 0-6 days    | 95+ years | 1         | red meats adjusted(g)                               |
| Brain and nervous system cancer | Female | 0-6 days    | 95+ years | -1        | vegetables adjusted(g)                              |
| Brain and nervous system cancer | Female | 0-6 days    | 95+ years | -1        | Healthcare access and quality index                 |
| Brain and nervous system cancer | Male   | 0-6 days    | 95+ years | 1         | Alcohol (liters per capita)                         |
| Brain and nervous system cancer | Male   | 0-6 days    | 95+ years | 1         | Cumulative Cigarettes (10 Years)                    |
| Brain and nervous system cancer | Male   | 0-6 days    | 95+ years | 1         | Cumulative Cigarettes (15 Years)                    |
| Brain and nervous system cancer | Male   | 0-6 days    | 95+ years | -1        | Education (years per capita)                        |
| Brain and nervous system cancer | Male   | 0-6 days    | 95+ years | 0         | LDI (I\$ per capita)                                |
| Brain and nervous system cancer | Male   | 0-6 days    | 95+ years | 1         | Cholesterol (total, mean per capita)                |
| Brain and nervous system cancer | Male   | 0-6 days    | 95+ years | 1         | Systolic Blood Pressure (mmHg)                      |
| Brain and nervous system cancer | Male   | 0-6 days    | 95+ years | 1         | Percent of total calories consumed as saturated fat |
| Brain and nervous system cancer | Male   | 0-6 days    | 95+ years | 1         | Smoking Prevalence                                  |
| Brain and nervous system cancer | Male   | 0-6 days    | 95+ years | -1        | Vegetables (kcal per capita)                        |
| Brain and nervous system cancer | Male   | 0-6 days    | 95+ years | 0         | Socio-demographic Index                             |
| Brain and nervous system cancer | Male   | 0-6 days    | 95+ years | -1        | fruits adjusted(g)                                  |
| Brain and nervous system cancer | Male   | 0-6 days    | 95+ years | 1         | red meats adjusted(g)                               |
| Brain and nervous system cancer | Male   | 0-6 days    | 95+ years | -1        | vegetables adjusted(g)                              |
| Brain and nervous system cancer | Male   | 0-6 days    | 95+ years | -1        | Healthcare access and quality index                 |
| Thyroid cancer                  | Female | 10-14 years | 95+ years | 1         | Alcohol (liters per capita)                         |
| Thyroid cancer                  | Female | 10-14 years | 95+ years | 1         | Tobacco (cigarettes per capita)                     |
| Thyroid cancer                  | Female | 10-14 years | 95+ years | -1        | Education (years per capita)                        |
| Thyroid cancer                  | Female | 10-14 years | 95+ years | 0         | LDI (I\$ per capita)                                |
| Thyroid cancer                  | Female | 10-14 years | 95+ years | 1         | Mean BMI                                            |

| Cause                | Sex    | Age start   | Age end   | Direction | Covariate                                              |
|----------------------|--------|-------------|-----------|-----------|--------------------------------------------------------|
| Thyroid cancer       | Female | 10-14 years | 95+ years | -1        | Sanitation (proportion with access)                    |
| Thyroid cancer       | Female | 10-14 years | 95+ years | 1         | Smoking Prevalence                                     |
| Thyroid cancer       | Female | 10-14 years | 95+ years | -1        | Improved Water Source (proportion with access)         |
| Thyroid cancer       | Female | 10-14 years | 95+ years | 1         | Log-transformed SEV scalar: Thyroid C                  |
| Thyroid cancer       | Female | 10-14 years | 95+ years | 0         | Socio-demographic Index                                |
| Thyroid cancer       | Female | 10-14 years | 95+ years | -1        | fruits adjusted(g)                                     |
| Thyroid cancer       | Female | 10-14 years | 95+ years | 1         | red meats adjusted(g)                                  |
| Thyroid cancer       | Female | 10-14 years | 95+ years | -1        | vegetables adjusted(g)                                 |
| Thyroid cancer       | Female | 10-14 years | 95+ years | -1        | Healthcare access and quality index                    |
| Thyroid cancer       | Male   | 10-14 years | 95+ years | 1         | Alcohol (liters per capita)                            |
| Thyroid cancer       | Male   | 10-14 years | 95+ years | 1         | Tobacco (cigarettes per capita)                        |
| Thyroid cancer       | Male   | 10-14 years | 95+ years | -1        | Education (years per capita)                           |
| Thyroid cancer       | Male   | 10-14 years | 95+ years | 0         | LDI (I\$ per capita)                                   |
| Thyroid cancer       | Male   | 10-14 years | 95+ years | 1         | Mean BMI                                               |
| Thyroid cancer       | Male   | 10-14 years | 95+ years | -1        | Sanitation (proportion with access)                    |
| Thyroid cancer       | Male   | 10-14 years | 95+ years | 1         | Smoking Prevalence                                     |
| Thyroid cancer       | Male   | 10-14 years | 95+ years | -1        | Improved Water Source (proportion with access)         |
| Thyroid cancer       | Male   | 10-14 years | 95+ years | 1         | Log-transformed SEV scalar: Thyroid C                  |
| Thyroid cancer       | Male   | 10-14 years | 95+ years | 0         | Socio-demographic Index                                |
| Thyroid cancer       | Male   | 10-14 years | 95+ years | -1        | fruits adjusted(g)                                     |
| Thyroid cancer       | Male   | 10-14 years | 95+ years | 1         | red meats adjusted(g)                                  |
| Thyroid cancer       | Male   | 10-14 years | 95+ years | -1        | vegetables adjusted(g)                                 |
| Thyroid cancer       | Male   | 10-14 years | 95+ years | -1        | Healthcare access and quality index                    |
| Thyroid cancer       | Male   | 10-14 years | 95+ years | 2         | Smoking Prevalence                                     |
| Mesothelioma         | Female | 15-19 years | 95+ years | 1         | Asbestos production (binary)                           |
| Mesothelioma         | Female | 15-19 years | 95+ years | 1         | Asbestos production (kg) per capita                    |
| Mesothelioma         | Female | 15-19 years | 95+ years | 1         | Cumulative Cigarettes (5 Years)                        |
| Mesothelioma         | Female | 15-19 years | 95+ years | -1        | Education (years per capita)                           |
| Mesothelioma         | Female | 15-19 years | 95+ years | 1         | Gold production (binary)                               |
| Mesothelioma         | Female | 15-19 years | 95+ years | 1         | Gold production (kg) per capita                        |
| Mesothelioma         | Female | 15-19 years | 95+ years | 0         | LDI (I\$ per capita)                                   |
| Mesothelioma         | Female | 15-19 years | 95+ years | 1         | Indoor Air Pollution (All Cooking Fuels)               |
| Mesothelioma         | Female | 15-19 years | 95+ years | 1         | Elevation Over 1500m (proportion)                      |
| Mesothelioma         | Female | 15-19 years | 95+ years | 1         | Elevation 500 to 1500m (proportion)                    |
| Mesothelioma         | Female | 15-19 years | 95+ years | 1         | Population Density (over 1000 ppl/sqkm, proportion)    |
| Mesothelioma         | Female | 15-19 years | 95+ years | 1         | Population Over 65 (proportion)                        |
| Mesothelioma         | Female | 15-19 years | 95+ years | 1         | Smoking Prevalence                                     |
| Mesothelioma         | Female | 15-19 years | 95+ years | 1         | Log-transformed SEV scalar: Mesothel                   |
| Mesothelioma         | Female | 15-19 years | 95+ years | 0         | Socio-demographic Index                                |
| Mesothelioma         | Female | 15-19 years | 95+ years | 1         | Asbestos consumption (metric tons per year per capita) |
| Mesothelioma         | Female | 15-19 years | 95+ years | -1        | Healthcare access and quality index                    |
| Mesothelioma         | Male   | 15-19 years | 95+ years | 1         | Cumulative Cigarettes (5 Years)                        |
| Mesothelioma         | Male   | 15-19 years | 95+ years | -1        | Education (years per capita)                           |
| Mesothelioma         | Male   | 15-19 years | 95+ years | 1         | Gold production (binary)                               |
| Mesothelioma         | Male   | 15-19 years | 95+ years | 1         | Gold production (kg) per capita                        |
| Mesothelioma         | Male   | 15-19 years | 95+ years | 0         | LDI (I\$ per capita)                                   |
| Mesothelioma         | Male   | 15-19 years | 95+ years | 1         | Indoor Air Pollution (All Cooking Fuels)               |
| Mesothelioma         | Male   | 15-19 years | 95+ years | 1         | Elevation Over 1500m (proportion)                      |
| Mesothelioma         | Male   | 15-19 years | 95+ years | 1         | Elevation 500 to 1500m (proportion)                    |
| Mesothelioma         | Male   | 15-19 years | 95+ years | 1         | Population Density (over 1000 ppl/sqkm, proportion)    |
| Mesothelioma         | Male   | 15-19 years | 95+ years | 1         | Population Over 65 (proportion)                        |
| Mesothelioma         | Male   | 15-19 years | 95+ years | 1         | Smoking Prevalence                                     |
| Mesothelioma         | Male   | 15-19 years | 95+ years | 0         | Socio-demographic Index                                |
| Mesothelioma         | Male   | 15-19 years | 95+ years | 1         | Asbestos consumption (metric tons per year per capita) |
| Mesothelioma         | Male   | 15-19 years | 95+ years | -1        | Healthcare access and quality index                    |
| Hodgkin lymphoma     | Male   | 0-6 days    | 95+ years | -1        | Education (years per capita)                           |
| Hodgkin lymphoma     | Male   | 0-6 days    | 95+ years | 0         | LDI (I\$ per capita)                                   |
| Hodgkin lymphoma     | Male   | 0-6 days    | 95+ years | 0         | Socio-demographic Index                                |
| Hodgkin lymphoma     | Male   | 0-6 days    | 95+ years | -1        | Healthcare access and quality index                    |
| Hodgkin lymphoma     | Female | 0-6 days    | 95+ years | -1        | Education (years per capita)                           |
| Hodgkin lymphoma     | Female | 0-6 days    | 95+ years | 0         | LDI (I\$ per capita)                                   |
| Hodgkin lymphoma     | Female | 0-6 days    | 95+ years | 0         | Socio-demographic Index                                |
| Hodgkin lymphoma     | Female | 0-6 days    | 95+ years | -1        | Healthcare access and quality index                    |
| Non-Hodgkin lymphoma | Male   | 0-6 days    | 95+ years | 1         | Alcohol (liters per capita)                            |
| Non-Hodgkin lymphoma | Male   | 0-6 days    | 95+ years | 1         | Cumulative Cigarettes (10 Years)                       |
| Non-Hodgkin lymphoma | Male   | 0-6 days    | 95+ years | -1        | Health System Access 2 (unitless)                      |
| Non-Hodgkin lymphoma | Male   | 0-6 days    | 95+ years | 0         | LDI (I\$ per capita)                                   |
| Non-Hodgkin lymphoma | Male   | 0-6 days    | 95+ years | 1         | Smoking Prevalence                                     |
| Non-Hodgkin lymphoma | Male   | 0-6 days    | 95+ years | 0         | Socio-demographic Index                                |
| Non-Hodgkin lymphoma | Male   | 0-6 days    | 95+ years | -1        | Health System Access (capped)                          |
| Non-Hodgkin lymphoma | Male   | 0-6 days    | 95+ years | -1        | Healthcare access and quality index                    |
| Non-Hodgkin lymphoma | Female | 0-6 days    | 95+ years | 1         | Alcohol (liters per capita)                            |
| Non-Hodgkin lymphoma | Female | 0-6 days    | 95+ years | 1         | Cumulative Cigarettes (10 Years)                       |
| Non-Hodgkin lymphoma | Female | 0-6 days    | 95+ years | -1        | Health System Access 2 (unitless)                      |
| Non-Hodgkin lymphoma | Female | 0-6 days    | 95+ years | 0         | LDI (I\$ per capita)                                   |
| Non-Hodgkin lymphoma | Female | 0-6 days    | 95+ years | 1         | Smoking Prevalence                                     |
| Non-Hodgkin lymphoma | Female | 0-6 days    | 95+ years | 0         | Socio-demographic Index                                |
| Non-Hodgkin lymphoma | Female | 0-6 days    | 95+ years | -1        | Healthcare access and quality index                    |
| Non-Hodgkin lymphoma | Female | 0-6 days    | 95+ years | 0         | Total Fertility Rate                                   |
| Multiple myeloma     | Male   | 15-19 years | 95+ years | 1         | Alcohol (liters per capita)                            |
| Multiple myeloma     | Male   | 15-19 years | 95+ years | 1         | Tobacco (cigarettes per capita)                        |
| Multiple myeloma     | Male   | 15-19 years | 95+ years | -1        | Education (years per capita)                           |
| Multiple myeloma     | Male   | 15-19 years | 95+ years | 0         | LDI (I\$ per capita)                                   |
| Multiple myeloma     | Male   | 15-19 years | 95+ years | 1         | Mean BMI                                               |
| Multiple myeloma     | Male   | 15-19 years | 95+ years | -1        | Sanitation (proportion with access)                    |
| Multiple myeloma     | Male   | 15-19 years | 95+ years | 1         | Smoking Prevalence                                     |
| Multiple myeloma     | Male   | 15-19 years | 95+ years | -1        | Improved Water Source (proportion with access)         |
| Multiple myeloma     | Male   | 15-19 years | 95+ years | 0         | Socio-demographic Index                                |
| Multiple myeloma     | Male   | 15-19 years | 95+ years | -1        | fruits adjusted(g)                                     |
| Multiple myeloma     | Male   | 15-19 years | 95+ years | 1         | red meats adjusted(g)                                  |
| Multiple myeloma     | Male   | 15-19 years | 95+ years | -1        | vegetables adjusted(g)                                 |
| Multiple myeloma     | Male   | 15-19 years | 95+ years | -1        | Healthcare access and quality index                    |

| Cause                   | Sex    | Age start   | Age end   | Direction | Covariate                                             |
|-------------------------|--------|-------------|-----------|-----------|-------------------------------------------------------|
| Multiple myeloma        | Female | 15-19 years | 95+ years | 1         | Alcohol (liters per capita)                           |
| Multiple myeloma        | Female | 15-19 years | 95+ years | 1         | Tobacco (cigarettes per capita)                       |
| Multiple myeloma        | Female | 15-19 years | 95+ years | -1        | Education (years per capita)                          |
| Multiple myeloma        | Female | 15-19 years | 95+ years | 0         | LDI (I\$ per capita)                                  |
| Multiple myeloma        | Female | 15-19 years | 95+ years | 1         | Mean BMI                                              |
| Multiple myeloma        | Female | 15-19 years | 95+ years | -1        | Sanitation (proportion with access)                   |
| Multiple myeloma        | Female | 15-19 years | 95+ years | 1         | Smoking Prevalence                                    |
| Multiple myeloma        | Female | 15-19 years | 95+ years | -1        | Improved Water Source (proportion with access)        |
| Multiple myeloma        | Female | 15-19 years | 95+ years | 0         | Socio-demographic Index                               |
| Multiple myeloma        | Female | 15-19 years | 95+ years | -1        | fruits adjusted(g)                                    |
| Multiple myeloma        | Female | 15-19 years | 95+ years | 1         | red meats adjusted(g)                                 |
| Multiple myeloma        | Female | 15-19 years | 95+ years | -1        | vegetables adjusted(g)                                |
| Multiple myeloma        | Female | 15-19 years | 95+ years | -1        | Healthcare access and quality index                   |
| Leukemia                | Female | 0-6 days    | 95+ years | 1         | Alcohol (liters per capita)                           |
| Leukemia                | Female | 0-6 days    | 95+ years | 1         | Tobacco (cigarettes per capita)                       |
| Leukemia                | Female | 0-6 days    | 95+ years | 1         | Cumulative Cigarettes (10 Years)                      |
| Leukemia                | Female | 0-6 days    | 95+ years | 1         | Cumulative Cigarettes (15 Years)                      |
| Leukemia                | Female | 0-6 days    | 95+ years | 1         | Cumulative Cigarettes (20 Years)                      |
| Leukemia                | Female | 0-6 days    | 95+ years | 1         | Cumulative Cigarettes (5 Years)                       |
| Leukemia                | Female | 0-6 days    | 95+ years | -1        | Education (years per capita)                          |
| Leukemia                | Female | 0-6 days    | 95+ years | -1        | Health System Access 2 (unitless)                     |
| Leukemia                | Female | 0-6 days    | 95+ years | 0         | LDI (I\$ per capita)                                  |
| Leukemia                | Female | 0-6 days    | 95+ years | 1         | Smoking Prevalence                                    |
| Leukemia                | Female | 0-6 days    | 95+ years | 1         | Log-transformed SEV scalar: Leukemia                  |
| Leukemia                | Female | 0-6 days    | 95+ years | 1         | Log-transformed age-standardized SEV scalar: Leukemia |
| Leukemia                | Female | 0-6 days    | 95+ years | 0         | Socio-demographic Index                               |
| Leukemia                | Male   | 0-6 days    | 95+ years | 1         | Alcohol (liters per capita)                           |
| Leukemia                | Male   | 0-6 days    | 95+ years | 1         | Tobacco (cigarettes per capita)                       |
| Leukemia                | Male   | 0-6 days    | 95+ years | 1         | Cumulative Cigarettes (10 Years)                      |
| Leukemia                | Male   | 0-6 days    | 95+ years | 1         | Cumulative Cigarettes (15 Years)                      |
| Leukemia                | Male   | 0-6 days    | 95+ years | 1         | Cumulative Cigarettes (20 Years)                      |
| Leukemia                | Male   | 0-6 days    | 95+ years | 1         | Cumulative Cigarettes (5 Years)                       |
| Leukemia                | Male   | 0-6 days    | 95+ years | -1        | Education (years per capita)                          |
| Leukemia                | Male   | 0-6 days    | 95+ years | -1        | Health System Access 2 (unitless)                     |
| Leukemia                | Male   | 0-6 days    | 95+ years | 0         | LDI (I\$ per capita)                                  |
| Leukemia                | Male   | 0-6 days    | 95+ years | 1         | Smoking Prevalence                                    |
| Leukemia                | Male   | 0-6 days    | 95+ years | 1         | Log-transformed SEV scalar: Leukemia                  |
| Leukemia                | Male   | 0-6 days    | 95+ years | 1         | Log-transformed age-standardized SEV scalar: Leukemia |
| Leukemia                | Male   | 0-6 days    | 95+ years | 0         | Socio-demographic Index                               |
| Leukemia                | Female | 0-6 days    | 95+ years | -1        | Health System Access (capped)                         |
| Leukemia                | Female | 0-6 days    | 95+ years | -1        | Healthcare access and quality index                   |
| Other neoplasms         | Male   | 0-6 days    | 95+ years | 1         | Tobacco (cigarettes per capita)                       |
| Other neoplasms         | Male   | 0-6 days    | 95+ years | -1        | Education (years per capita)                          |
| Other neoplasms         | Male   | 0-6 days    | 95+ years | -1        | Health System Access 2 (unitless)                     |
| Other neoplasms         | Male   | 0-6 days    | 95+ years | 0         | LDI (I\$ per capita)                                  |
| Other neoplasms         | Male   | 0-6 days    | 95+ years | -1        | Nuts & Seeds (kcal per capita)                        |
| Other neoplasms         | Male   | 0-6 days    | 95+ years | 1         | Smoking Prevalence                                    |
| Other neoplasms         | Male   | 0-6 days    | 95+ years | 0         | Socio-demographic Index                               |
| Other neoplasms         | Male   | 0-6 days    | 95+ years | -1        | fruits adjusted(g)                                    |
| Other neoplasms         | Male   | 0-6 days    | 95+ years | -1        | pufa adjusted(percent)                                |
| Other neoplasms         | Male   | 0-6 days    | 95+ years | -1        | vegetables adjusted(g)                                |
| Other neoplasms         | Male   | 0-6 days    | 95+ years | -1        | Healthcare access and quality index                   |
| Other neoplasms         | Female | 0-6 days    | 95+ years | 1         | Tobacco (cigarettes per capita)                       |
| Other neoplasms         | Female | 0-6 days    | 95+ years | -1        | Education (years per capita)                          |
| Other neoplasms         | Female | 0-6 days    | 95+ years | -1        | Health System Access 2 (unitless)                     |
| Other neoplasms         | Female | 0-6 days    | 95+ years | 0         | LDI (I\$ per capita)                                  |
| Other neoplasms         | Female | 0-6 days    | 95+ years | 1         | Smoking Prevalence                                    |
| Other neoplasms         | Female | 0-6 days    | 95+ years | 0         | Socio-demographic Index                               |
| Other neoplasms         | Female | 0-6 days    | 95+ years | -1        | fruits adjusted(g)                                    |
| Other neoplasms         | Female | 0-6 days    | 95+ years | -1        | nuts seeds adjusted(g)                                |
| Other neoplasms         | Female | 0-6 days    | 95+ years | -1        | pufa adjusted(percent)                                |
| Other neoplasms         | Female | 0-6 days    | 95+ years | -1        | vegetables adjusted(g)                                |
| Other neoplasms         | Female | 0-6 days    | 95+ years | -1        | Healthcare access and quality index                   |
| Other neoplasms         | Male   | 0-6 days    | 95+ years | -1        | nuts seeds adjusted(g)                                |
| Cardiovascular diseases | Female | 0-6 days    | 95+ years | 0         | Alcohol (liters per capita)                           |
| Cardiovascular diseases | Female | 0-6 days    | 95+ years | 1         | Diabetes Fasting Plasma Glucose (mmol/L)              |
| Cardiovascular diseases | Female | 0-6 days    | 95+ years | -1        | LDI (I\$ per capita)                                  |
| Cardiovascular diseases | Female | 0-6 days    | 95+ years | 1         | Mean BMI                                              |
| Cardiovascular diseases | Female | 0-6 days    | 95+ years | 1         | Cholesterol (total, mean per capita)                  |
| Cardiovascular diseases | Female | 0-6 days    | 95+ years | 1         | Systolic Blood Pressure (mmHg)                        |
| Cardiovascular diseases | Female | 0-6 days    | 95+ years | 1         | Indoor Air Pollution (All Cooking Fuels)              |
| Cardiovascular diseases | Female | 0-6 days    | 95+ years | 1         | Outdoor Air Pollution (PM2.5)                         |
| Cardiovascular diseases | Female | 0-6 days    | 95+ years | -1        | Elevation Over 1500m (proportion)                     |
| Cardiovascular diseases | Female | 0-6 days    | 95+ years | 1         | Smoking Prevalence                                    |
| Cardiovascular diseases | Female | 0-6 days    | 95+ years | 0         | Socio-demographic Index                               |
| Cardiovascular diseases | Female | 0-6 days    | 95+ years | -1        | omega 3 adjusted(g)                                   |
| Cardiovascular diseases | Female | 0-6 days    | 95+ years | -1        | fruits adjusted(g)                                    |
| Cardiovascular diseases | Female | 0-6 days    | 95+ years | -1        | nuts seeds adjusted(g)                                |
| Cardiovascular diseases | Female | 0-6 days    | 95+ years | -1        | pufa adjusted(percent)                                |
| Cardiovascular diseases | Female | 0-6 days    | 95+ years | -1        | pulses legumes adjusted(g)                            |
| Cardiovascular diseases | Female | 0-6 days    | 95+ years | -1        | vegetables adjusted(g)                                |
| Cardiovascular diseases | Female | 0-6 days    | 95+ years | -1        | whole grains adjusted(g)                              |
| Cardiovascular diseases | Female | 0-6 days    | 95+ years | 1         | Log-transformed SEV scalar: CVD                       |
| Cardiovascular diseases | Female | 0-6 days    | 95+ years | -1        | Healthcare access and quality index                   |
| Cardiovascular diseases | Female | 0-6 days    | 95+ years | 1         | Diet high in trans fatty acids                        |
| Cardiovascular diseases | Male   | 0-6 days    | 95+ years | 0         | Alcohol (liters per capita)                           |
| Cardiovascular diseases | Male   | 0-6 days    | 95+ years | 1         | Diabetes Fasting Plasma Glucose (mmol/L)              |
| Cardiovascular diseases | Male   | 0-6 days    | 95+ years | -1        | LDI (I\$ per capita)                                  |
| Cardiovascular diseases | Male   | 0-6 days    | 95+ years | 1         | Mean BMI                                              |
| Cardiovascular diseases | Male   | 0-6 days    | 95+ years | 1         | Cholesterol (total, mean per capita)                  |
| Cardiovascular diseases | Male   | 0-6 days    | 95+ years | 1         | Systolic Blood Pressure (mmHg)                        |
| Cardiovascular diseases | Male   | 0-6 days    | 95+ years | 1         | Indoor Air Pollution (All Cooking Fuels)              |



| Cause                   | Sex    | Age start   | Age end   | Direction | Covariate                                              |
|-------------------------|--------|-------------|-----------|-----------|--------------------------------------------------------|
| Cardiovascular diseases | Male   | 0-6 days    | 95+ years | 1         | Outdoor Air Pollution (PM2.5)                          |
| Cardiovascular diseases | Male   | 0-6 days    | 95+ years | -1        | Elevation Over 1500m (proportion)                      |
| Cardiovascular diseases | Male   | 0-6 days    | 95+ years | 1         | Smoking Prevalence                                     |
| Cardiovascular diseases | Male   | 0-6 days    | 95+ years | 0         | Socio-demographic Index                                |
| Cardiovascular diseases | Male   | 0-6 days    | 95+ years | -1        | omega 3 adjusted(g)                                    |
| Cardiovascular diseases | Male   | 0-6 days    | 95+ years | -1        | fruits adjusted(g)                                     |
| Cardiovascular diseases | Male   | 0-6 days    | 95+ years | -1        | nuts seeds adjusted(g)                                 |
| Cardiovascular diseases | Male   | 0-6 days    | 95+ years | -1        | pufa adjusted(percent)                                 |
| Cardiovascular diseases | Male   | 0-6 days    | 95+ years | -1        | pulses legumes adjusted(g)                             |
| Cardiovascular diseases | Male   | 0-6 days    | 95+ years | -1        | vegetables adjusted(g)                                 |
| Cardiovascular diseases | Male   | 0-6 days    | 95+ years | -1        | whole grains adjusted(g)                               |
| Cardiovascular diseases | Male   | 0-6 days    | 95+ years | 1         | Log-transformed SEV scalar: CVD                        |
| Cardiovascular diseases | Male   | 0-6 days    | 95+ years | -1        | Healthcare access and quality index                    |
| Cardiovascular diseases | Male   | 0-6 days    | 95+ years | 1         | Diet high in trans fatty acids                         |
| Rheumatic heart disease | Male   | 1-4 years   | 95+ years | -1        | Education (years per capita)                           |
| Rheumatic heart disease | Male   | 1-4 years   | 95+ years | -1        | LDI (IS per capita)                                    |
| Rheumatic heart disease | Male   | 1-4 years   | 95+ years | 1         | Underweight (proportion <2SD weight for age, <5 years) |
| Rheumatic heart disease | Male   | 1-4 years   | 95+ years | -1        | Sanitation (proportion with access)                    |
| Rheumatic heart disease | Male   | 1-4 years   | 95+ years | -1        | Improved Water Source (proportion with access)         |
| Rheumatic heart disease | Male   | 1-4 years   | 95+ years | 1         | Log-transformed SEV scalar: RHD                        |
| Rheumatic heart disease | Male   | 1-4 years   | 95+ years | -1        | Socio-demographic Index                                |
| Rheumatic heart disease | Male   | 1-4 years   | 95+ years | -1        | Healthcare access and quality index                    |
| Rheumatic heart disease | Female | 1-4 years   | 95+ years | -1        | Education (years per capita)                           |
| Rheumatic heart disease | Female | 1-4 years   | 95+ years | -1        | LDI (IS per capita)                                    |
| Rheumatic heart disease | Female | 1-4 years   | 95+ years | 1         | Underweight (proportion <2SD weight for age, <5 years) |
| Rheumatic heart disease | Female | 1-4 years   | 95+ years | -1        | Sanitation (proportion with access)                    |
| Rheumatic heart disease | Female | 1-4 years   | 95+ years | -1        | Improved Water Source (proportion with access)         |
| Rheumatic heart disease | Female | 1-4 years   | 95+ years | 1         | Log-transformed SEV scalar: RHD                        |
| Rheumatic heart disease | Female | 1-4 years   | 95+ years | -1        | Socio-demographic Index                                |
| Rheumatic heart disease | Female | 1-4 years   | 95+ years | -1        | Healthcare access and quality index                    |
| Ischemic heart disease  | Male   | 28-364 days | 95+ years | 0         | Alcohol (liters per capita)                            |
| Ischemic heart disease  | Male   | 28-364 days | 95+ years | 1         | Diabetes Fasting Plasma Glucose (mmol/L)               |
| Ischemic heart disease  | Male   | 28-364 days | 95+ years | -1        | LDI (IS per capita)                                    |
| Ischemic heart disease  | Male   | 28-364 days | 95+ years | 1         | Mean BMI                                               |
| Ischemic heart disease  | Male   | 28-364 days | 95+ years | 1         | Cholesterol (total, mean per capita)                   |
| Ischemic heart disease  | Male   | 28-364 days | 95+ years | 1         | Systolic Blood Pressure (mmHg)                         |
| Ischemic heart disease  | Male   | 28-364 days | 95+ years | 1         | Indoor Air Pollution (All Cooking Fuels)               |
| Ischemic heart disease  | Male   | 28-364 days | 95+ years | 1         | Outdoor Air Pollution (PM2.5)                          |
| Ischemic heart disease  | Male   | 28-364 days | 95+ years | -1        | Elevation Over 1500m (proportion)                      |
| Ischemic heart disease  | Male   | 28-364 days | 95+ years | 1         | Smoking Prevalence                                     |
| Ischemic heart disease  | Male   | 28-364 days | 95+ years | 1         | Log-transformed SEV scalar: IHD                        |
| Ischemic heart disease  | Male   | 28-364 days | 95+ years | 0         | Socio-demographic Index                                |
| Ischemic heart disease  | Male   | 28-364 days | 95+ years | -1        | omega 3 adjusted(g)                                    |
| Ischemic heart disease  | Male   | 28-364 days | 95+ years | -1        | fruits adjusted(g)                                     |
| Ischemic heart disease  | Male   | 28-364 days | 95+ years | -1        | nuts seeds adjusted(g)                                 |
| Ischemic heart disease  | Male   | 28-364 days | 95+ years | -1        | pufa adjusted(percent)                                 |
| Ischemic heart disease  | Male   | 28-364 days | 95+ years | -1        | pulses legumes adjusted(g)                             |
| Ischemic heart disease  | Male   | 28-364 days | 95+ years | -1        | vegetables adjusted(g)                                 |
| Ischemic heart disease  | Male   | 28-364 days | 95+ years | -1        | whole grains adjusted(g)                               |
| Ischemic heart disease  | Male   | 28-364 days | 95+ years | -1        | Healthcare access and quality index                    |
| Ischemic heart disease  | Male   | 28-364 days | 95+ years | 1         | Diet high in trans fatty acids                         |
| Ischemic heart disease  | Female | 28-364 days | 95+ years | 0         | Alcohol (liters per capita)                            |
| Ischemic heart disease  | Female | 28-364 days | 95+ years | 1         | Diabetes Fasting Plasma Glucose (mmol/L)               |
| Ischemic heart disease  | Female | 28-364 days | 95+ years | -1        | LDI (IS per capita)                                    |
| Ischemic heart disease  | Female | 28-364 days | 95+ years | 1         | Mean BMI                                               |
| Ischemic heart disease  | Female | 28-364 days | 95+ years | 1         | Cholesterol (total, mean per capita)                   |
| Ischemic heart disease  | Female | 28-364 days | 95+ years | 1         | Systolic Blood Pressure (mmHg)                         |
| Ischemic heart disease  | Female | 28-364 days | 95+ years | 1         | Indoor Air Pollution (All Cooking Fuels)               |
| Ischemic heart disease  | Female | 28-364 days | 95+ years | 1         | Outdoor Air Pollution (PM2.5)                          |
| Ischemic heart disease  | Female | 28-364 days | 95+ years | -1        | Elevation Over 1500m (proportion)                      |
| Ischemic heart disease  | Female | 28-364 days | 95+ years | 1         | Smoking Prevalence                                     |
| Ischemic heart disease  | Female | 28-364 days | 95+ years | 1         | Log-transformed SEV scalar: IHD                        |
| Ischemic heart disease  | Female | 28-364 days | 95+ years | 0         | Socio-demographic Index                                |
| Ischemic heart disease  | Female | 28-364 days | 95+ years | -1        | omega 3 adjusted(g)                                    |
| Ischemic heart disease  | Female | 28-364 days | 95+ years | -1        | fruits adjusted(g)                                     |
| Ischemic heart disease  | Female | 28-364 days | 95+ years | -1        | nuts seeds adjusted(g)                                 |
| Ischemic heart disease  | Female | 28-364 days | 95+ years | -1        | pufa adjusted(percent)                                 |
| Ischemic heart disease  | Female | 28-364 days | 95+ years | -1        | pulses legumes adjusted(g)                             |
| Ischemic heart disease  | Female | 28-364 days | 95+ years | -1        | vegetables adjusted(g)                                 |
| Ischemic heart disease  | Female | 28-364 days | 95+ years | -1        | whole grains adjusted(g)                               |
| Ischemic heart disease  | Female | 28-364 days | 95+ years | -1        | Healthcare access and quality index                    |
| Ischemic heart disease  | Female | 28-364 days | 95+ years | 1         | Diet high in trans fatty acids                         |
| Cerebrovascular disease | Male   | 0-6 days    | 95+ years | 0         | Alcohol (liters per capita)                            |
| Cerebrovascular disease | Male   | 0-6 days    | 95+ years | 1         | Diabetes Fasting Plasma Glucose (mmol/L)               |
| Cerebrovascular disease | Male   | 0-6 days    | 95+ years | -1        | LDI (IS per capita)                                    |
| Cerebrovascular disease | Male   | 0-6 days    | 95+ years | 1         | Mean BMI                                               |
| Cerebrovascular disease | Male   | 0-6 days    | 95+ years | 1         | Cholesterol (total, mean per capita)                   |
| Cerebrovascular disease | Male   | 0-6 days    | 95+ years | 1         | Systolic Blood Pressure (mmHg)                         |
| Cerebrovascular disease | Male   | 0-6 days    | 95+ years | 1         | Indoor Air Pollution (All Cooking Fuels)               |
| Cerebrovascular disease | Male   | 0-6 days    | 95+ years | 1         | Outdoor Air Pollution (PM2.5)                          |
| Cerebrovascular disease | Male   | 0-6 days    | 95+ years | -1        | Elevation Over 1500m (proportion)                      |
| Cerebrovascular disease | Male   | 0-6 days    | 95+ years | 1         | Smoking Prevalence                                     |
| Cerebrovascular disease | Male   | 0-6 days    | 95+ years | 1         | Log-transformed SEV scalar: Stroke                     |
| Cerebrovascular disease | Male   | 0-6 days    | 95+ years | 0         | Socio-demographic Index                                |
| Cerebrovascular disease | Male   | 0-6 days    | 95+ years | -1        | omega 3 adjusted(g)                                    |
| Cerebrovascular disease | Male   | 0-6 days    | 95+ years | -1        | fruits adjusted(g)                                     |
| Cerebrovascular disease | Male   | 0-6 days    | 95+ years | -1        | nuts seeds adjusted(g)                                 |
| Cerebrovascular disease | Male   | 0-6 days    | 95+ years | -1        | pufa adjusted(percent)                                 |
| Cerebrovascular disease | Male   | 0-6 days    | 95+ years | -1        | pulses legumes adjusted(g)                             |
| Cerebrovascular disease | Male   | 0-6 days    | 95+ years | -1        | vegetables adjusted(g)                                 |
| Cerebrovascular disease | Male   | 0-6 days    | 95+ years | -1        | whole grains adjusted(g)                               |
| Cerebrovascular disease | Male   | 0-6 days    | 95+ years | -1        | Healthcare access and quality index                    |

| Cause                   | Sex    | Age start   | Age end   | Direction | Covariate                                |
|-------------------------|--------|-------------|-----------|-----------|------------------------------------------|
| Cerebrovascular disease | Male   | 0-6 days    | 95+ years | 1         | Diet high in trans fatty acids           |
| Cerebrovascular disease | Female | 0-6 days    | 95+ years | 0         | Alcohol (liters per capita)              |
| Cerebrovascular disease | Female | 0-6 days    | 95+ years | 1         | Diabetes Fasting Plasma Glucose (mmol/L) |
| Cerebrovascular disease | Female | 0-6 days    | 95+ years | -1        | LDI (IS per capita)                      |
| Cerebrovascular disease | Female | 0-6 days    | 95+ years | 1         | Mean BMI                                 |
| Cerebrovascular disease | Female | 0-6 days    | 95+ years | 1         | Cholesterol (total, mean per capita)     |
| Cerebrovascular disease | Female | 0-6 days    | 95+ years | 1         | Systolic Blood Pressure (mmHg)           |
| Cerebrovascular disease | Female | 0-6 days    | 95+ years | 1         | Indoor Air Pollution (All Cooking Fuels) |
| Cerebrovascular disease | Female | 0-6 days    | 95+ years | 1         | Outdoor Air Pollution (PM2.5)            |
| Cerebrovascular disease | Female | 0-6 days    | 95+ years | -1        | Elevation Over 1500m (proportion)        |
| Cerebrovascular disease | Female | 0-6 days    | 95+ years | 1         | Smoking Prevalence                       |
| Cerebrovascular disease | Female | 0-6 days    | 95+ years | 1         | Log-transformed SEV scalar: Stroke       |
| Cerebrovascular disease | Female | 0-6 days    | 95+ years | 0         | Socio-demographic Index                  |
| Cerebrovascular disease | Female | 0-6 days    | 95+ years | -1        | omega 3 adjusted(g)                      |
| Cerebrovascular disease | Female | 0-6 days    | 95+ years | -1        | fruits adjusted(g)                       |
| Cerebrovascular disease | Female | 0-6 days    | 95+ years | -1        | nuts seeds adjusted(g)                   |
| Cerebrovascular disease | Female | 0-6 days    | 95+ years | -1        | pufa adjusted(percent)                   |
| Cerebrovascular disease | Female | 0-6 days    | 95+ years | -1        | pulses legumes adjusted(g)               |
| Cerebrovascular disease | Female | 0-6 days    | 95+ years | -1        | vegetables adjusted(g)                   |
| Cerebrovascular disease | Female | 0-6 days    | 95+ years | -1        | whole grains adjusted(g)                 |
| Cerebrovascular disease | Female | 0-6 days    | 95+ years | -1        | Healthcare access and quality index      |
| Cerebrovascular disease | Female | 0-6 days    | 95+ years | 1         | Diet high in trans fatty acids           |
| Ischemic stroke         | Male   | 28-364 days | 95+ years | 0         | Alcohol (liters per capita)              |
| Ischemic stroke         | Male   | 28-364 days | 95+ years | 1         | Diabetes Fasting Plasma Glucose (mmol/L) |
| Ischemic stroke         | Male   | 28-364 days | 95+ years | -1        | LDI (IS per capita)                      |
| Ischemic stroke         | Male   | 28-364 days | 95+ years | 1         | Mean BMI                                 |
| Ischemic stroke         | Male   | 28-364 days | 95+ years | 1         | Cholesterol (total, mean per capita)     |
| Ischemic stroke         | Male   | 28-364 days | 95+ years | 1         | Systolic Blood Pressure (mmHg)           |
| Ischemic stroke         | Male   | 28-364 days | 95+ years | 1         | Indoor Air Pollution (All Cooking Fuels) |
| Ischemic stroke         | Male   | 28-364 days | 95+ years | 1         | Outdoor Air Pollution (PM2.5)            |
| Ischemic stroke         | Male   | 28-364 days | 95+ years | -1        | Elevation Over 1500m (proportion)        |
| Ischemic stroke         | Male   | 28-364 days | 95+ years | 1         | Smoking Prevalence                       |
| Ischemic stroke         | Male   | 28-364 days | 95+ years | 1         | Log-transformed SEV scalar: Isch Stroke  |
| Ischemic stroke         | Male   | 28-364 days | 95+ years | 0         | Socio-demographic Index                  |
| Ischemic stroke         | Male   | 28-364 days | 95+ years | -1        | omega 3 adjusted(g)                      |
| Ischemic stroke         | Male   | 28-364 days | 95+ years | -1        | fruits adjusted(g)                       |
| Ischemic stroke         | Male   | 28-364 days | 95+ years | -1        | nuts seeds adjusted(g)                   |
| Ischemic stroke         | Male   | 28-364 days | 95+ years | -1        | pufa adjusted(percent)                   |
| Ischemic stroke         | Male   | 28-364 days | 95+ years | -1        | pulses legumes adjusted(g)               |
| Ischemic stroke         | Male   | 28-364 days | 95+ years | -1        | vegetables adjusted(g)                   |
| Ischemic stroke         | Male   | 28-364 days | 95+ years | -1        | whole grains adjusted(g)                 |
| Ischemic stroke         | Male   | 28-364 days | 95+ years | -1        | Healthcare access and quality index      |
| Ischemic stroke         | Male   | 28-364 days | 95+ years | 1         | Diet high in trans fatty acids           |
| Ischemic stroke         | Female | 28-364 days | 95+ years | 0         | Alcohol (liters per capita)              |
| Ischemic stroke         | Female | 28-364 days | 95+ years | 1         | Diabetes Fasting Plasma Glucose (mmol/L) |
| Ischemic stroke         | Female | 28-364 days | 95+ years | -1        | LDI (IS per capita)                      |
| Ischemic stroke         | Female | 28-364 days | 95+ years | 1         | Mean BMI                                 |
| Ischemic stroke         | Female | 28-364 days | 95+ years | 1         | Cholesterol (total, mean per capita)     |
| Ischemic stroke         | Female | 28-364 days | 95+ years | 1         | Systolic Blood Pressure (mmHg)           |
| Ischemic stroke         | Female | 28-364 days | 95+ years | 1         | Indoor Air Pollution (All Cooking Fuels) |
| Ischemic stroke         | Female | 28-364 days | 95+ years | 1         | Outdoor Air Pollution (PM2.5)            |
| Ischemic stroke         | Female | 28-364 days | 95+ years | -1        | Elevation Over 1500m (proportion)        |
| Ischemic stroke         | Female | 28-364 days | 95+ years | 1         | Smoking Prevalence                       |
| Ischemic stroke         | Female | 28-364 days | 95+ years | 1         | Log-transformed SEV scalar: Isch Stroke  |
| Ischemic stroke         | Female | 28-364 days | 95+ years | 0         | Socio-demographic Index                  |
| Ischemic stroke         | Female | 28-364 days | 95+ years | -1        | omega 3 adjusted(g)                      |
| Ischemic stroke         | Female | 28-364 days | 95+ years | -1        | fruits adjusted(g)                       |
| Ischemic stroke         | Female | 28-364 days | 95+ years | -1        | nuts seeds adjusted(g)                   |
| Ischemic stroke         | Female | 28-364 days | 95+ years | -1        | pufa adjusted(percent)                   |
| Ischemic stroke         | Female | 28-364 days | 95+ years | -1        | pulses legumes adjusted(g)               |
| Ischemic stroke         | Female | 28-364 days | 95+ years | -1        | vegetables adjusted(g)                   |
| Ischemic stroke         | Female | 28-364 days | 95+ years | -1        | whole grains adjusted(g)                 |
| Ischemic stroke         | Female | 28-364 days | 95+ years | -1        | Healthcare access and quality index      |
| Ischemic stroke         | Female | 28-364 days | 95+ years | 1         | Diet high in trans fatty acids           |
| Hemorrhagic stroke      | Male   | 0-6 days    | 95+ years | 0         | Alcohol (liters per capita)              |
| Hemorrhagic stroke      | Male   | 0-6 days    | 95+ years | 1         | Diabetes Fasting Plasma Glucose (mmol/L) |
| Hemorrhagic stroke      | Male   | 0-6 days    | 95+ years | -1        | LDI (IS per capita)                      |
| Hemorrhagic stroke      | Male   | 0-6 days    | 95+ years | 1         | Mean BMI                                 |
| Hemorrhagic stroke      | Male   | 0-6 days    | 95+ years | 0         | Cholesterol (total, mean per capita)     |
| Hemorrhagic stroke      | Male   | 0-6 days    | 95+ years | 1         | Systolic Blood Pressure (mmHg)           |
| Hemorrhagic stroke      | Male   | 0-6 days    | 95+ years | 1         | Indoor Air Pollution (All Cooking Fuels) |
| Hemorrhagic stroke      | Male   | 0-6 days    | 95+ years | 1         | Outdoor Air Pollution (PM2.5)            |
| Hemorrhagic stroke      | Male   | 0-6 days    | 95+ years | -1        | Elevation Over 1500m (proportion)        |
| Hemorrhagic stroke      | Male   | 0-6 days    | 95+ years | 1         | Smoking Prevalence                       |
| Hemorrhagic stroke      | Male   | 0-6 days    | 95+ years | 1         | Log-transformed SEV scalar: Hem Stroke   |
| Hemorrhagic stroke      | Male   | 0-6 days    | 95+ years | 0         | Socio-demographic Index                  |
| Hemorrhagic stroke      | Male   | 0-6 days    | 95+ years | -1        | omega 3 adjusted(g)                      |
| Hemorrhagic stroke      | Male   | 0-6 days    | 95+ years | -1        | fruits adjusted(g)                       |
| Hemorrhagic stroke      | Male   | 0-6 days    | 95+ years | -1        | nuts seeds adjusted(g)                   |
| Hemorrhagic stroke      | Male   | 0-6 days    | 95+ years | -1        | pufa adjusted(percent)                   |
| Hemorrhagic stroke      | Male   | 0-6 days    | 95+ years | -1        | pulses legumes adjusted(g)               |
| Hemorrhagic stroke      | Male   | 0-6 days    | 95+ years | -1        | vegetables adjusted(g)                   |
| Hemorrhagic stroke      | Male   | 0-6 days    | 95+ years | -1        | whole grains adjusted(g)                 |
| Hemorrhagic stroke      | Male   | 0-6 days    | 95+ years | -1        | Healthcare access and quality index      |
| Hemorrhagic stroke      | Male   | 0-6 days    | 95+ years | 1         | Diet high in trans fatty acids           |
| Hemorrhagic stroke      | Female | 0-6 days    | 95+ years | 0         | Alcohol (liters per capita)              |
| Hemorrhagic stroke      | Female | 0-6 days    | 95+ years | 1         | Diabetes Fasting Plasma Glucose (mmol/L) |
| Hemorrhagic stroke      | Female | 0-6 days    | 95+ years | -1        | LDI (IS per capita)                      |
| Hemorrhagic stroke      | Female | 0-6 days    | 95+ years | 1         | Mean BMI                                 |
| Hemorrhagic stroke      | Female | 0-6 days    | 95+ years | 0         | Cholesterol (total, mean per capita)     |
| Hemorrhagic stroke      | Female | 0-6 days    | 95+ years | 1         | Systolic Blood Pressure (mmHg)           |
| Hemorrhagic stroke      | Female | 0-6 days    | 95+ years | 1         | Indoor Air Pollution (All Cooking Fuels) |

| Cause                          | Sex    | Age start   | Age end   | Direction | Covariate                              |
|--------------------------------|--------|-------------|-----------|-----------|----------------------------------------|
| Hemorrhagic stroke             | Female | 0-6 days    | 95+ years | 1         | Outdoor Air Pollution (PM2.5)          |
| Hemorrhagic stroke             | Female | 0-6 days    | 95+ years | -1        | Elevation Over 1500m (proportion)      |
| Hemorrhagic stroke             | Female | 0-6 days    | 95+ years | 1         | Smoking Prevalence                     |
| Hemorrhagic stroke             | Female | 0-6 days    | 95+ years | 1         | Log-transformed SEV scalar: Hem Stroke |
| Hemorrhagic stroke             | Female | 0-6 days    | 95+ years | 0         | Socio-demographic Index                |
| Hemorrhagic stroke             | Female | 0-6 days    | 95+ years | -1        | omega 3 adjusted(g)                    |
| Hemorrhagic stroke             | Female | 0-6 days    | 95+ years | -1        | fruits adjusted(g)                     |
| Hemorrhagic stroke             | Female | 0-6 days    | 95+ years | -1        | nuts seeds adjusted(g)                 |
| Hemorrhagic stroke             | Female | 0-6 days    | 95+ years | -1        | pufa adjusted(percent)                 |
| Hemorrhagic stroke             | Female | 0-6 days    | 95+ years | -1        | pulses legumes adjusted(g)             |
| Hemorrhagic stroke             | Female | 0-6 days    | 95+ years | -1        | vegetables adjusted(g)                 |
| Hemorrhagic stroke             | Female | 0-6 days    | 95+ years | -1        | whole grains adjusted(g)               |
| Hemorrhagic stroke             | Female | 0-6 days    | 95+ years | -1        | Healthcare access and quality index    |
| Hemorrhagic stroke             | Female | 0-6 days    | 95+ years | 1         | Diet high in trans fatty acids         |
| Hypertensive heart disease     | Male   | 28-364 days | 95+ years | -1        | LDI (I\$ per capita)                   |
| Hypertensive heart disease     | Male   | 28-364 days | 95+ years | 1         | Mean BMI                               |
| Hypertensive heart disease     | Male   | 28-364 days | 95+ years | 1         | Cholesterol (total, mean per capita)   |
| Hypertensive heart disease     | Male   | 28-364 days | 95+ years | 1         | Systolic Blood Pressure (mmHg)         |
| Hypertensive heart disease     | Male   | 28-364 days | 95+ years | 1         | Smoking Prevalence                     |
| Hypertensive heart disease     | Male   | 28-364 days | 95+ years | 0         | Socio-demographic Index                |
| Hypertensive heart disease     | Male   | 28-364 days | 95+ years | -1        | Healthcare access and quality index    |
| Hypertensive heart disease     | Female | 28-364 days | 95+ years | -1        | LDI (I\$ per capita)                   |
| Hypertensive heart disease     | Female | 28-364 days | 95+ years | 1         | Mean BMI                               |
| Hypertensive heart disease     | Female | 28-364 days | 95+ years | 1         | Cholesterol (total, mean per capita)   |
| Hypertensive heart disease     | Female | 28-364 days | 95+ years | 1         | Systolic Blood Pressure (mmHg)         |
| Hypertensive heart disease     | Female | 28-364 days | 95+ years | 1         | Smoking Prevalence                     |
| Hypertensive heart disease     | Female | 28-364 days | 95+ years | 0         | Socio-demographic Index                |
| Hypertensive heart disease     | Female | 28-364 days | 95+ years | -1        | Healthcare access and quality index    |
| Cardiomyopathy and myocarditis | Male   | 0-6 days    | 95+ years | 0         | Alcohol (liters per capita)            |
| Cardiomyopathy and myocarditis | Male   | 0-6 days    | 95+ years | 0         | LDI (I\$ per capita)                   |
| Cardiomyopathy and myocarditis | Male   | 0-6 days    | 95+ years | 1         | Mean BMI                               |
| Cardiomyopathy and myocarditis | Male   | 0-6 days    | 95+ years | 1         | Systolic Blood Pressure (mmHg)         |
| Cardiomyopathy and myocarditis | Male   | 0-6 days    | 95+ years | 1         | Smoking Prevalence                     |
| Cardiomyopathy and myocarditis | Male   | 0-6 days    | 95+ years | 1         | Log-transformed SEV scalar: CMP        |
| Cardiomyopathy and myocarditis | Male   | 0-6 days    | 95+ years | 0         | Socio-demographic Index                |
| Cardiomyopathy and myocarditis | Male   | 0-6 days    | 95+ years | -1        | Healthcare access and quality index    |
| Cardiomyopathy and myocarditis | Female | 0-6 days    | 95+ years | 0         | Alcohol (liters per capita)            |
| Cardiomyopathy and myocarditis | Female | 0-6 days    | 95+ years | 0         | LDI (I\$ per capita)                   |
| Cardiomyopathy and myocarditis | Female | 0-6 days    | 95+ years | 1         | Mean BMI                               |
| Cardiomyopathy and myocarditis | Female | 0-6 days    | 95+ years | 1         | Systolic Blood Pressure (mmHg)         |
| Cardiomyopathy and myocarditis | Female | 0-6 days    | 95+ years | 1         | Smoking Prevalence                     |
| Cardiomyopathy and myocarditis | Female | 0-6 days    | 95+ years | 1         | Log-transformed SEV scalar: CMP        |
| Cardiomyopathy and myocarditis | Female | 0-6 days    | 95+ years | 0         | Socio-demographic Index                |
| Cardiomyopathy and myocarditis | Female | 0-6 days    | 95+ years | -1        | Healthcare access and quality index    |
| Aortic aneurysm                | Male   | 15-19 years | 95+ years | 0         | Alcohol (liters per capita)            |
| Aortic aneurysm                | Male   | 15-19 years | 95+ years | 1         | Cumulative Cigarettes (10 Years)       |
| Aortic aneurysm                | Male   | 15-19 years | 95+ years | -1        | LDI (I\$ per capita)                   |
| Aortic aneurysm                | Male   | 15-19 years | 95+ years | 1         | Mean BMI                               |
| Aortic aneurysm                | Male   | 15-19 years | 95+ years | 1         | Cholesterol (total, mean per capita)   |
| Aortic aneurysm                | Male   | 15-19 years | 95+ years | 1         | Systolic Blood Pressure (mmHg)         |
| Aortic aneurysm                | Male   | 15-19 years | 95+ years | 1         | Log-transformed SEV scalar: Aort An    |
| Aortic aneurysm                | Male   | 15-19 years | 95+ years | 0         | Socio-demographic Index                |
| Aortic aneurysm                | Male   | 15-19 years | 95+ years | -1        | omega 3 adjusted(g)                    |
| Aortic aneurysm                | Male   | 15-19 years | 95+ years | -1        | fruits adjusted(g)                     |
| Aortic aneurysm                | Male   | 15-19 years | 95+ years | -1        | nuts seeds adjusted(g)                 |
| Aortic aneurysm                | Male   | 15-19 years | 95+ years | -1        | pufa adjusted(percent)                 |
| Aortic aneurysm                | Male   | 15-19 years | 95+ years | 1         | pulses legumes adjusted(g)             |
| Aortic aneurysm                | Male   | 15-19 years | 95+ years | -1        | vegetables adjusted(g)                 |
| Aortic aneurysm                | Male   | 15-19 years | 95+ years | -1        | whole grains adjusted(g)               |
| Aortic aneurysm                | Male   | 15-19 years | 95+ years | -1        | Healthcare access and quality index    |
| Aortic aneurysm                | Female | 15-19 years | 95+ years | 0         | Alcohol (liters per capita)            |
| Aortic aneurysm                | Female | 15-19 years | 95+ years | 1         | Cumulative Cigarettes (10 Years)       |
| Aortic aneurysm                | Female | 15-19 years | 95+ years | -1        | LDI (I\$ per capita)                   |
| Aortic aneurysm                | Female | 15-19 years | 95+ years | 1         | Mean BMI                               |
| Aortic aneurysm                | Female | 15-19 years | 95+ years | 1         | Cholesterol (total, mean per capita)   |
| Aortic aneurysm                | Female | 15-19 years | 95+ years | 1         | Systolic Blood Pressure (mmHg)         |
| Aortic aneurysm                | Female | 15-19 years | 95+ years | 1         | Log-transformed SEV scalar: Aort An    |
| Aortic aneurysm                | Female | 15-19 years | 95+ years | 0         | Socio-demographic Index                |
| Aortic aneurysm                | Female | 15-19 years | 95+ years | -1        | omega 3 adjusted(g)                    |
| Aortic aneurysm                | Female | 15-19 years | 95+ years | -1        | fruits adjusted(g)                     |
| Aortic aneurysm                | Female | 15-19 years | 95+ years | -1        | nuts seeds adjusted(g)                 |
| Aortic aneurysm                | Female | 15-19 years | 95+ years | -1        | pufa adjusted(percent)                 |
| Aortic aneurysm                | Female | 15-19 years | 95+ years | 1         | pulses legumes adjusted(g)             |
| Aortic aneurysm                | Female | 15-19 years | 95+ years | -1        | vegetables adjusted(g)                 |
| Aortic aneurysm                | Female | 15-19 years | 95+ years | -1        | whole grains adjusted(g)               |
| Aortic aneurysm                | Female | 15-19 years | 95+ years | -1        | Healthcare access and quality index    |
| Peripheral artery disease      | Male   | 40-44 years | 95+ years | 0         | Alcohol (liters per capita)            |
| Peripheral artery disease      | Male   | 40-44 years | 95+ years | -1        | LDI (I\$ per capita)                   |
| Peripheral artery disease      | Male   | 40-44 years | 95+ years | 1         | Mean BMI                               |
| Peripheral artery disease      | Male   | 40-44 years | 95+ years | 1         | Cholesterol (total, mean per capita)   |
| Peripheral artery disease      | Male   | 40-44 years | 95+ years | 1         | Systolic Blood Pressure (mmHg)         |
| Peripheral artery disease      | Male   | 40-44 years | 95+ years | 1         | Smoking Prevalence                     |
| Peripheral artery disease      | Male   | 40-44 years | 95+ years | 1         | Log-transformed SEV scalar: PVD        |
| Peripheral artery disease      | Male   | 40-44 years | 95+ years | 0         | Socio-demographic Index                |
| Peripheral artery disease      | Male   | 40-44 years | 95+ years | -1        | omega 3 adjusted(g)                    |
| Peripheral artery disease      | Male   | 40-44 years | 95+ years | -1        | fruits adjusted(g)                     |
| Peripheral artery disease      | Male   | 40-44 years | 95+ years | -1        | nuts seeds adjusted(g)                 |
| Peripheral artery disease      | Male   | 40-44 years | 95+ years | -1        | pufa adjusted(percent)                 |
| Peripheral artery disease      | Male   | 40-44 years | 95+ years | -1        | pulses legumes adjusted(g)             |
| Peripheral artery disease      | Male   | 40-44 years | 95+ years | -1        | vegetables adjusted(g)                 |
| Peripheral artery disease      | Male   | 40-44 years | 95+ years | -1        | whole grains adjusted(g)               |
| Peripheral artery disease      | Male   | 40-44 years | 95+ years | -1        | Healthcare access and quality index    |

| Cause                                         | Sex    | Age start   | Age end   | Direction | Covariate                                           |
|-----------------------------------------------|--------|-------------|-----------|-----------|-----------------------------------------------------|
| Peripheral artery disease                     | Female | 40-44 years | 95+ years | 0         | Alcohol (liters per capita)                         |
| Peripheral artery disease                     | Female | 40-44 years | 95+ years | -1        | LDI (I\$ per capita)                                |
| Peripheral artery disease                     | Female | 40-44 years | 95+ years | 1         | Mean BMI                                            |
| Peripheral artery disease                     | Female | 40-44 years | 95+ years | 1         | Cholesterol (total, mean per capita)                |
| Peripheral artery disease                     | Female | 40-44 years | 95+ years | 1         | Systolic Blood Pressure (mmHg)                      |
| Peripheral artery disease                     | Female | 40-44 years | 95+ years | 1         | Smoking Prevalence                                  |
| Peripheral artery disease                     | Female | 40-44 years | 95+ years | 1         | Log-transformed SEV scalar: PVD                     |
| Peripheral artery disease                     | Female | 40-44 years | 95+ years | 0         | Socio-demographic Index                             |
| Peripheral artery disease                     | Female | 40-44 years | 95+ years | -1        | omega 3 adjusted(g)                                 |
| Peripheral artery disease                     | Female | 40-44 years | 95+ years | -1        | fruits adjusted(g)                                  |
| Peripheral artery disease                     | Female | 40-44 years | 95+ years | -1        | nuts seeds adjusted(g)                              |
| Peripheral artery disease                     | Female | 40-44 years | 95+ years | -1        | pufa adjusted(percent)                              |
| Peripheral artery disease                     | Female | 40-44 years | 95+ years | -1        | pulses legumes adjusted(g)                          |
| Peripheral artery disease                     | Female | 40-44 years | 95+ years | -1        | vegetables adjusted(g)                              |
| Peripheral artery disease                     | Female | 40-44 years | 95+ years | -1        | whole grains adjusted(g)                            |
| Peripheral artery disease                     | Female | 40-44 years | 95+ years | -1        | Healthcare access and quality index                 |
| Endocarditis                                  | Female | 0-6 days    | 95+ years | -1        | LDI (I\$ per capita)                                |
| Endocarditis                                  | Female | 0-6 days    | 95+ years | -1        | Sanitation (proportion with access)                 |
| Endocarditis                                  | Female | 0-6 days    | 95+ years | -1        | Improved Water Source (proportion with access)      |
| Endocarditis                                  | Female | 0-6 days    | 95+ years | 1         | Log-transformed SEV scalar: Endocar                 |
| Endocarditis                                  | Female | 0-6 days    | 95+ years | 0         | Socio-demographic Index                             |
| Endocarditis                                  | Female | 0-6 days    | 95+ years | -1        | Healthcare access and quality index                 |
| Endocarditis                                  | Male   | 0-6 days    | 95+ years | -1        | LDI (I\$ per capita)                                |
| Endocarditis                                  | Male   | 0-6 days    | 95+ years | -1        | Sanitation (proportion with access)                 |
| Endocarditis                                  | Male   | 0-6 days    | 95+ years | -1        | Improved Water Source (proportion with access)      |
| Endocarditis                                  | Male   | 0-6 days    | 95+ years | 1         | Log-transformed SEV scalar: Endocar                 |
| Endocarditis                                  | Male   | 0-6 days    | 95+ years | 0         | Socio-demographic Index                             |
| Endocarditis                                  | Male   | 0-6 days    | 95+ years | -1        | Healthcare access and quality index                 |
| Other cardiovascular and circulatory diseases | Male   | 0-6 days    | 95+ years | 0         | Alcohol (liters per capita)                         |
| Other cardiovascular and circulatory diseases | Male   | 0-6 days    | 95+ years | 1         | Diabetes Fasting Plasma Glucose (mmol/L)            |
| Other cardiovascular and circulatory diseases | Male   | 0-6 days    | 95+ years | -1        | LDI (I\$ per capita)                                |
| Other cardiovascular and circulatory diseases | Male   | 0-6 days    | 95+ years | 1         | Mean BMI                                            |
| Other cardiovascular and circulatory diseases | Male   | 0-6 days    | 95+ years | 1         | Cholesterol (total, mean per capita)                |
| Other cardiovascular and circulatory diseases | Male   | 0-6 days    | 95+ years | 1         | Systolic Blood Pressure (mmHg)                      |
| Other cardiovascular and circulatory diseases | Male   | 0-6 days    | 95+ years | 1         | Indoor Air Pollution (All Cooking Fuels)            |
| Other cardiovascular and circulatory diseases | Male   | 0-6 days    | 95+ years | 1         | Outdoor Air Pollution (PM2.5)                       |
| Other cardiovascular and circulatory diseases | Male   | 0-6 days    | 95+ years | -1        | Elevation Over 1500m (proportion)                   |
| Other cardiovascular and circulatory diseases | Male   | 0-6 days    | 95+ years | 1         | Smoking Prevalence                                  |
| Other cardiovascular and circulatory diseases | Male   | 0-6 days    | 95+ years | 1         | Log-transformed SEV scalar: Oth Cardio              |
| Other cardiovascular and circulatory diseases | Male   | 0-6 days    | 95+ years | 0         | Socio-demographic Index                             |
| Other cardiovascular and circulatory diseases | Male   | 0-6 days    | 95+ years | -1        | omega 3 adjusted(g)                                 |
| Other cardiovascular and circulatory diseases | Male   | 0-6 days    | 95+ years | -1        | fruits adjusted(g)                                  |
| Other cardiovascular and circulatory diseases | Male   | 0-6 days    | 95+ years | -1        | nuts seeds adjusted(g)                              |
| Other cardiovascular and circulatory diseases | Male   | 0-6 days    | 95+ years | -1        | pufa adjusted(percent)                              |
| Other cardiovascular and circulatory diseases | Male   | 0-6 days    | 95+ years | -1        | pulses legumes adjusted(g)                          |
| Other cardiovascular and circulatory diseases | Male   | 0-6 days    | 95+ years | -1        | vegetables adjusted(g)                              |
| Other cardiovascular and circulatory diseases | Male   | 0-6 days    | 95+ years | -1        | whole grains adjusted(g)                            |
| Other cardiovascular and circulatory diseases | Male   | 0-6 days    | 95+ years | -1        | Healthcare access and quality index                 |
| Other cardiovascular and circulatory diseases | Female | 0-6 days    | 95+ years | 0         | Alcohol (liters per capita)                         |
| Other cardiovascular and circulatory diseases | Female | 0-6 days    | 95+ years | 1         | Diabetes Fasting Plasma Glucose (mmol/L)            |
| Other cardiovascular and circulatory diseases | Female | 0-6 days    | 95+ years | -1        | LDI (I\$ per capita)                                |
| Other cardiovascular and circulatory diseases | Female | 0-6 days    | 95+ years | 1         | Mean BMI                                            |
| Other cardiovascular and circulatory diseases | Female | 0-6 days    | 95+ years | 1         | Cholesterol (total, mean per capita)                |
| Other cardiovascular and circulatory diseases | Female | 0-6 days    | 95+ years | 1         | Systolic Blood Pressure (mmHg)                      |
| Other cardiovascular and circulatory diseases | Female | 0-6 days    | 95+ years | 1         | Indoor Air Pollution (All Cooking Fuels)            |
| Other cardiovascular and circulatory diseases | Female | 0-6 days    | 95+ years | 1         | Outdoor Air Pollution (PM2.5)                       |
| Other cardiovascular and circulatory diseases | Female | 0-6 days    | 95+ years | -1        | Elevation Over 1500m (proportion)                   |
| Other cardiovascular and circulatory diseases | Female | 0-6 days    | 95+ years | 1         | Smoking Prevalence                                  |
| Other cardiovascular and circulatory diseases | Female | 0-6 days    | 95+ years | 1         | Log-transformed SEV scalar: Oth Cardio              |
| Other cardiovascular and circulatory diseases | Female | 0-6 days    | 95+ years | 0         | Socio-demographic Index                             |
| Other cardiovascular and circulatory diseases | Female | 0-6 days    | 95+ years | -1        | omega 3 adjusted(g)                                 |
| Other cardiovascular and circulatory diseases | Female | 0-6 days    | 95+ years | -1        | fruits adjusted(g)                                  |
| Other cardiovascular and circulatory diseases | Female | 0-6 days    | 95+ years | -1        | nuts seeds adjusted(g)                              |
| Other cardiovascular and circulatory diseases | Female | 0-6 days    | 95+ years | -1        | pufa adjusted(percent)                              |
| Other cardiovascular and circulatory diseases | Female | 0-6 days    | 95+ years | -1        | pulses legumes adjusted(g)                          |
| Other cardiovascular and circulatory diseases | Female | 0-6 days    | 95+ years | -1        | vegetables adjusted(g)                              |
| Other cardiovascular and circulatory diseases | Female | 0-6 days    | 95+ years | -1        | whole grains adjusted(g)                            |
| Other cardiovascular and circulatory diseases | Female | 0-6 days    | 95+ years | -1        | Healthcare access and quality index                 |
| Chronic respiratory diseases                  | Male   | 1-4 years   | 95+ years | 1         | Cumulative Cigarettes (10 Years)                    |
| Chronic respiratory diseases                  | Male   | 1-4 years   | 95+ years | 1         | Cumulative Cigarettes (5 Years)                     |
| Chronic respiratory diseases                  | Male   | 1-4 years   | 95+ years | -1        | Education (years per capita)                        |
| Chronic respiratory diseases                  | Male   | 1-4 years   | 95+ years | -1        | LDI (I\$ per capita)                                |
| Chronic respiratory diseases                  | Male   | 1-4 years   | 95+ years | 1         | Indoor Air Pollution (All Cooking Fuels)            |
| Chronic respiratory diseases                  | Male   | 1-4 years   | 95+ years | 1         | Outdoor Air Pollution (PM2.5)                       |
| Chronic respiratory diseases                  | Male   | 1-4 years   | 95+ years | 1         | Elevation Over 1500m (proportion)                   |
| Chronic respiratory diseases                  | Male   | 1-4 years   | 95+ years | 1         | Elevation 500 to 1500m (proportion)                 |
| Chronic respiratory diseases                  | Male   | 1-4 years   | 95+ years | 1         | Population Density (over 1000 ppl/sqkm, proportion) |
| Chronic respiratory diseases                  | Male   | 1-4 years   | 95+ years | 1         | Smoking Prevalence                                  |
| Chronic respiratory diseases                  | Male   | 1-4 years   | 95+ years | 0         | Socio-demographic Index                             |
| Chronic respiratory diseases                  | Male   | 1-4 years   | 95+ years | 1         | Log-transformed SEV scalar: Chr Resp                |
| Chronic respiratory diseases                  | Male   | 1-4 years   | 95+ years | -1        | Healthcare access and quality index                 |
| Chronic respiratory diseases                  | Female | 1-4 years   | 95+ years | 1         | Cumulative Cigarettes (10 Years)                    |
| Chronic respiratory diseases                  | Female | 1-4 years   | 95+ years | 1         | Cumulative Cigarettes (5 Years)                     |
| Chronic respiratory diseases                  | Female | 1-4 years   | 95+ years | -1        | Education (years per capita)                        |
| Chronic respiratory diseases                  | Female | 1-4 years   | 95+ years | -1        | LDI (I\$ per capita)                                |
| Chronic respiratory diseases                  | Female | 1-4 years   | 95+ years | 1         | Indoor Air Pollution (All Cooking Fuels)            |
| Chronic respiratory diseases                  | Female | 1-4 years   | 95+ years | 1         | Outdoor Air Pollution (PM2.5)                       |
| Chronic respiratory diseases                  | Female | 1-4 years   | 95+ years | 1         | Elevation Over 1500m (proportion)                   |
| Chronic respiratory diseases                  | Female | 1-4 years   | 95+ years | 1         | Elevation 500 to 1500m (proportion)                 |
| Chronic respiratory diseases                  | Female | 1-4 years   | 95+ years | 1         | Population Density (over 1000 ppl/sqkm, proportion) |
| Chronic respiratory diseases                  | Female | 1-4 years   | 95+ years | 1         | Smoking Prevalence                                  |
| Chronic respiratory diseases                  | Female | 1-4 years   | 95+ years | 0         | Socio-demographic Index                             |

| Cause                                 | Sex    | Age start | Age end   | Direction | Covariate                                              |
|---------------------------------------|--------|-----------|-----------|-----------|--------------------------------------------------------|
| Chronic respiratory diseases          | Female | 1-4 years | 95+ years | 1         | Log-transformed SEV scalar: Chr Resp                   |
| Chronic respiratory diseases          | Female | 1-4 years | 95+ years | 1         | Healthcare access and quality index                    |
| Chronic obstructive pulmonary disease | Male   | 1-4 years | 95+ years | 1         | Cumulative Cigarettes (10 Years)                       |
| Chronic obstructive pulmonary disease | Male   | 1-4 years | 95+ years | 1         | Cumulative Cigarettes (20 Years)                       |
| Chronic obstructive pulmonary disease | Male   | 1-4 years | 95+ years | 1         | Cumulative Cigarettes (5 Years)                        |
| Chronic obstructive pulmonary disease | Male   | 1-4 years | 95+ years | -1        | Education (years per capita)                           |
| Chronic obstructive pulmonary disease | Male   | 1-4 years | 95+ years | -1        | LDI (IS per capita)                                    |
| Chronic obstructive pulmonary disease | Male   | 1-4 years | 95+ years | 1         | Indoor Air Pollution (All Cooking Fuels)               |
| Chronic obstructive pulmonary disease | Male   | 1-4 years | 95+ years | 1         | Outdoor Air Pollution (PM2.5)                          |
| Chronic obstructive pulmonary disease | Male   | 1-4 years | 95+ years | 1         | Elevation Over 1500m (proportion)                      |
| Chronic obstructive pulmonary disease | Male   | 1-4 years | 95+ years | 1         | Smoking Prevalence                                     |
| Chronic obstructive pulmonary disease | Male   | 1-4 years | 95+ years | 1         | Log-transformed SEV scalar: COPD                       |
| Chronic obstructive pulmonary disease | Male   | 1-4 years | 95+ years | 0         | Socio-demographic Index                                |
| Chronic obstructive pulmonary disease | Male   | 1-4 years | 95+ years | -1        | Healthcare access and quality index                    |
| Chronic obstructive pulmonary disease | Female | 1-4 years | 95+ years | 1         | Cumulative Cigarettes (10 Years)                       |
| Chronic obstructive pulmonary disease | Female | 1-4 years | 95+ years | 1         | Cumulative Cigarettes (5 Years)                        |
| Chronic obstructive pulmonary disease | Female | 1-4 years | 95+ years | -1        | Education (years per capita)                           |
| Chronic obstructive pulmonary disease | Female | 1-4 years | 95+ years | -1        | LDI (IS per capita)                                    |
| Chronic obstructive pulmonary disease | Female | 1-4 years | 95+ years | 1         | Indoor Air Pollution (All Cooking Fuels)               |
| Chronic obstructive pulmonary disease | Female | 1-4 years | 95+ years | 1         | Outdoor Air Pollution (PM2.5)                          |
| Chronic obstructive pulmonary disease | Female | 1-4 years | 95+ years | 1         | Elevation Over 1500m (proportion)                      |
| Chronic obstructive pulmonary disease | Female | 1-4 years | 95+ years | 1         | Smoking Prevalence                                     |
| Chronic obstructive pulmonary disease | Female | 1-4 years | 95+ years | 1         | Log-transformed SEV scalar: COPD                       |
| Chronic obstructive pulmonary disease | Female | 1-4 years | 95+ years | 0         | Socio-demographic Index                                |
| Chronic obstructive pulmonary disease | Female | 1-4 years | 95+ years | 1         | Healthcare access and quality index                    |
| Pneumoconiosis                        | Female | 1-4 years | 95+ years | 1         | Coal Production (per capita)                           |
| Pneumoconiosis                        | Female | 1-4 years | 95+ years | 1         | Cumulative Cigarettes (5 Years)                        |
| Pneumoconiosis                        | Female | 1-4 years | 95+ years | -1        | Education (years per capita)                           |
| Pneumoconiosis                        | Female | 1-4 years | 95+ years | 1         | Gold production (kg) per capita                        |
| Pneumoconiosis                        | Female | 1-4 years | 95+ years | -1        | LDI (IS per capita)                                    |
| Pneumoconiosis                        | Female | 1-4 years | 95+ years | 1         | Indoor Air Pollution (All Cooking Fuels)               |
| Pneumoconiosis                        | Female | 1-4 years | 95+ years | 1         | Elevation Over 1500m (proportion)                      |
| Pneumoconiosis                        | Female | 1-4 years | 95+ years | 1         | Elevation 500 to 1500m (proportion)                    |
| Pneumoconiosis                        | Female | 1-4 years | 95+ years | 1         | Smoking Prevalence                                     |
| Pneumoconiosis                        | Female | 1-4 years | 95+ years | 1         | Log-transformed SEV scalar: Pneumocon                  |
| Pneumoconiosis                        | Female | 1-4 years | 95+ years | -1        | Socio-demographic Index                                |
| Pneumoconiosis                        | Female | 1-4 years | 95+ years | -1        | Healthcare access and quality index                    |
| Pneumoconiosis                        | Female | 1-4 years | 95+ years | 1         | Asbestos consumption (metric tons per year per capita) |
| Pneumoconiosis                        | Male   | 1-4 years | 95+ years | 1         | Coal Production (per capita)                           |
| Pneumoconiosis                        | Male   | 1-4 years | 95+ years | 1         | Cumulative Cigarettes (5 Years)                        |
| Pneumoconiosis                        | Male   | 1-4 years | 95+ years | -1        | Education (years per capita)                           |
| Pneumoconiosis                        | Male   | 1-4 years | 95+ years | 1         | Gold production (kg) per capita                        |
| Pneumoconiosis                        | Male   | 1-4 years | 95+ years | -1        | LDI (IS per capita)                                    |
| Pneumoconiosis                        | Male   | 1-4 years | 95+ years | 1         | Indoor Air Pollution (All Cooking Fuels)               |
| Pneumoconiosis                        | Male   | 1-4 years | 95+ years | 1         | Elevation Over 1500m (proportion)                      |
| Pneumoconiosis                        | Male   | 1-4 years | 95+ years | 1         | Elevation 500 to 1500m (proportion)                    |
| Pneumoconiosis                        | Male   | 1-4 years | 95+ years | 1         | Smoking Prevalence                                     |
| Pneumoconiosis                        | Male   | 1-4 years | 95+ years | 1         | Log-transformed SEV scalar: Pneumocon                  |
| Pneumoconiosis                        | Male   | 1-4 years | 95+ years | -1        | Socio-demographic Index                                |
| Pneumoconiosis                        | Male   | 1-4 years | 95+ years | -1        | Healthcare access and quality index                    |
| Pneumoconiosis                        | Male   | 1-4 years | 95+ years | 1         | Asbestos consumption (metric tons per year per capita) |
| Silicosis                             | Female | 1-4 years | 95+ years | 1         | Cumulative Cigarettes (5 Years)                        |
| Silicosis                             | Female | 1-4 years | 95+ years | -1        | Education (years per capita)                           |
| Silicosis                             | Female | 1-4 years | 95+ years | 1         | Gold production (kg) per capita                        |
| Silicosis                             | Female | 1-4 years | 95+ years | -1        | LDI (IS per capita)                                    |
| Silicosis                             | Female | 1-4 years | 95+ years | 1         | Indoor Air Pollution (All Cooking Fuels)               |
| Silicosis                             | Female | 1-4 years | 95+ years | 1         | Elevation Over 1500m (proportion)                      |
| Silicosis                             | Female | 1-4 years | 95+ years | 1         | Elevation 500 to 1500m (proportion)                    |
| Silicosis                             | Female | 1-4 years | 95+ years | 1         | Smoking Prevalence                                     |
| Silicosis                             | Female | 1-4 years | 95+ years | 1         | Log-transformed SEV scalar: Silicosis                  |
| Silicosis                             | Female | 1-4 years | 95+ years | -1        | Socio-demographic Index                                |
| Silicosis                             | Female | 1-4 years | 95+ years | -1        | Healthcare access and quality index                    |
| Silicosis                             | Male   | 1-4 years | 95+ years | 1         | Cumulative Cigarettes (5 Years)                        |
| Silicosis                             | Male   | 1-4 years | 95+ years | -1        | Education (years per capita)                           |
| Silicosis                             | Male   | 1-4 years | 95+ years | 1         | Gold production (kg) per capita                        |
| Silicosis                             | Male   | 1-4 years | 95+ years | -1        | LDI (IS per capita)                                    |
| Silicosis                             | Male   | 1-4 years | 95+ years | 1         | Indoor Air Pollution (All Cooking Fuels)               |
| Silicosis                             | Male   | 1-4 years | 95+ years | 1         | Elevation Over 1500m (proportion)                      |
| Silicosis                             | Male   | 1-4 years | 95+ years | 1         | Elevation 500 to 1500m (proportion)                    |
| Silicosis                             | Male   | 1-4 years | 95+ years | 1         | Smoking Prevalence                                     |
| Silicosis                             | Male   | 1-4 years | 95+ years | 1         | Log-transformed SEV scalar: Silicosis                  |
| Silicosis                             | Male   | 1-4 years | 95+ years | -1        | Socio-demographic Index                                |
| Silicosis                             | Male   | 1-4 years | 95+ years | -1        | Healthcare access and quality index                    |
| Asbestosis                            | Female | 1-4 years | 95+ years | 1         | Cumulative Cigarettes (5 Years)                        |
| Asbestosis                            | Female | 1-4 years | 95+ years | -1        | Education (years per capita)                           |
| Asbestosis                            | Female | 1-4 years | 95+ years | -1        | LDI (IS per capita)                                    |
| Asbestosis                            | Female | 1-4 years | 95+ years | 1         | Indoor Air Pollution (All Cooking Fuels)               |
| Asbestosis                            | Female | 1-4 years | 95+ years | 1         | Elevation Over 1500m (proportion)                      |
| Asbestosis                            | Female | 1-4 years | 95+ years | 1         | Elevation 500 to 1500m (proportion)                    |
| Asbestosis                            | Female | 1-4 years | 95+ years | 1         | Smoking Prevalence                                     |
| Asbestosis                            | Female | 1-4 years | 95+ years | 1         | Log-transformed SEV scalar: Asbestosis                 |
| Asbestosis                            | Female | 1-4 years | 95+ years | -1        | Socio-demographic Index                                |
| Asbestosis                            | Female | 1-4 years | 95+ years | -1        | Healthcare access and quality index                    |
| Asbestosis                            | Female | 1-4 years | 95+ years | 1         | Asbestos consumption (metric tons per year per capita) |
| Asbestosis                            | Male   | 1-4 years | 95+ years | 1         | Cumulative Cigarettes (5 Years)                        |
| Asbestosis                            | Male   | 1-4 years | 95+ years | -1        | Education (years per capita)                           |
| Asbestosis                            | Male   | 1-4 years | 95+ years | -1        | LDI (IS per capita)                                    |
| Asbestosis                            | Male   | 1-4 years | 95+ years | 1         | Indoor Air Pollution (All Cooking Fuels)               |
| Asbestosis                            | Male   | 1-4 years | 95+ years | 1         | Elevation Over 1500m (proportion)                      |
| Asbestosis                            | Male   | 1-4 years | 95+ years | 1         | Elevation 500 to 1500m (proportion)                    |
| Asbestosis                            | Male   | 1-4 years | 95+ years | 1         | Smoking Prevalence                                     |
| Asbestosis                            | Male   | 1-4 years | 95+ years | 1         | Log-transformed SEV scalar: Asbestosis                 |
| Asbestosis                            | Male   | 1-4 years | 95+ years | -1        | Socio-demographic Index                                |
| Asbestosis                            | Male   | 1-4 years | 95+ years | -1        | Healthcare access and quality index                    |
| Asbestosis                            | Male   | 1-4 years | 95+ years | 1         | Asbestos consumption (metric tons per year per capita) |
| Asbestosis                            | Male   | 1-4 years | 95+ years | 1         | Cumulative Cigarettes (5 Years)                        |
| Asbestosis                            | Male   | 1-4 years | 95+ years | -1        | Education (years per capita)                           |
| Asbestosis                            | Male   | 1-4 years | 95+ years | -1        | LDI (IS per capita)                                    |
| Asbestosis                            | Male   | 1-4 years | 95+ years | 1         | Indoor Air Pollution (All Cooking Fuels)               |
| Asbestosis                            | Male   | 1-4 years | 95+ years | 1         | Elevation Over 1500m (proportion)                      |
| Asbestosis                            | Male   | 1-4 years | 95+ years | 1         | Elevation 500 to 1500m (proportion)                    |
| Asbestosis                            | Male   | 1-4 years | 95+ years | 1         | Smoking Prevalence                                     |
| Asbestosis                            | Male   | 1-4 years | 95+ years | 1         | Log-transformed SEV scalar: Asbestosis                 |

| Cause                                               | Sex    | Age start | Age end   | Direction | Covariate                                              |
|-----------------------------------------------------|--------|-----------|-----------|-----------|--------------------------------------------------------|
| Asbestosis                                          | Male   | 1-4 years | 95+ years | -1        | Socio-demographic Index                                |
| Asbestosis                                          | Male   | 1-4 years | 95+ years | -1        | Healthcare access and quality index                    |
| Asbestosis                                          | Male   | 1-4 years | 95+ years | 1         | Asbestos consumption (metric tons per year per capita) |
| Asbestosis                                          | Male   | 1-4 years | 95+ years | 0         | Socio-demographic Index                                |
| Coal workers pneumoconiosis                         | Male   | 1-4 years | 95+ years | 1         | Coal Production (per capita)                           |
| Coal workers pneumoconiosis                         | Male   | 1-4 years | 95+ years | 1         | Cumulative Cigarettes (5 Years)                        |
| Coal workers pneumoconiosis                         | Male   | 1-4 years | 95+ years | -1        | Education (years per capita)                           |
| Coal workers pneumoconiosis                         | Male   | 1-4 years | 95+ years | -1        | LDI (I\$ per capita)                                   |
| Coal workers pneumoconiosis                         | Male   | 1-4 years | 95+ years | 1         | Indoor Air Pollution (All Cooking Fuels)               |
| Coal workers pneumoconiosis                         | Male   | 1-4 years | 95+ years | 1         | Elevation Over 1500m (proportion)                      |
| Coal workers pneumoconiosis                         | Male   | 1-4 years | 95+ years | 1         | Elevation 500 to 1500m (proportion)                    |
| Coal workers pneumoconiosis                         | Male   | 1-4 years | 95+ years | 1         | Smoking Prevalence                                     |
| Coal workers pneumoconiosis                         | Male   | 1-4 years | 95+ years | 1         | Log-transformed SEV scalar: Coal W                     |
| Coal workers pneumoconiosis                         | Male   | 1-4 years | 95+ years | -1        | Socio-demographic Index                                |
| Coal workers pneumoconiosis                         | Male   | 1-4 years | 95+ years | -1        | Healthcare access and quality index                    |
| Coal workers pneumoconiosis                         | Female | 1-4 years | 95+ years | 1         | Coal Production (per capita)                           |
| Coal workers pneumoconiosis                         | Female | 1-4 years | 95+ years | 1         | Cumulative Cigarettes (5 Years)                        |
| Coal workers pneumoconiosis                         | Female | 1-4 years | 95+ years | -1        | Education (years per capita)                           |
| Coal workers pneumoconiosis                         | Female | 1-4 years | 95+ years | -1        | LDI (I\$ per capita)                                   |
| Coal workers pneumoconiosis                         | Female | 1-4 years | 95+ years | 1         | Indoor Air Pollution (All Cooking Fuels)               |
| Coal workers pneumoconiosis                         | Female | 1-4 years | 95+ years | 1         | Elevation Over 1500m (proportion)                      |
| Coal workers pneumoconiosis                         | Female | 1-4 years | 95+ years | 1         | Elevation 500 to 1500m (proportion)                    |
| Coal workers pneumoconiosis                         | Female | 1-4 years | 95+ years | 1         | Smoking Prevalence                                     |
| Coal workers pneumoconiosis                         | Female | 1-4 years | 95+ years | 1         | Log-transformed SEV scalar: Coal W                     |
| Coal workers pneumoconiosis                         | Female | 1-4 years | 95+ years | -1        | Socio-demographic Index                                |
| Coal workers pneumoconiosis                         | Female | 1-4 years | 95+ years | -1        | Healthcare access and quality index                    |
| Other pneumoconiosis                                | Male   | 1-4 years | 95+ years | 1         | Cumulative Cigarettes (5 Years)                        |
| Other pneumoconiosis                                | Male   | 1-4 years | 95+ years | -1        | Education (years per capita)                           |
| Other pneumoconiosis                                | Male   | 1-4 years | 95+ years | -1        | LDI (I\$ per capita)                                   |
| Other pneumoconiosis                                | Male   | 1-4 years | 95+ years | 1         | Indoor Air Pollution (All Cooking Fuels)               |
| Other pneumoconiosis                                | Male   | 1-4 years | 95+ years | 1         | Elevation Over 1500m (proportion)                      |
| Other pneumoconiosis                                | Male   | 1-4 years | 95+ years | 1         | Elevation 500 to 1500m (proportion)                    |
| Other pneumoconiosis                                | Male   | 1-4 years | 95+ years | 1         | Smoking Prevalence                                     |
| Other pneumoconiosis                                | Male   | 1-4 years | 95+ years | 1         | Log-transformed SEV scalar: Oth Pneum                  |
| Other pneumoconiosis                                | Male   | 1-4 years | 95+ years | -1        | Socio-demographic Index                                |
| Other pneumoconiosis                                | Male   | 1-4 years | 95+ years | -1        | Healthcare access and quality index                    |
| Other pneumoconiosis                                | Female | 1-4 years | 95+ years | 1         | Cumulative Cigarettes (5 Years)                        |
| Other pneumoconiosis                                | Female | 1-4 years | 95+ years | -1        | Education (years per capita)                           |
| Other pneumoconiosis                                | Female | 1-4 years | 95+ years | -1        | LDI (I\$ per capita)                                   |
| Other pneumoconiosis                                | Female | 1-4 years | 95+ years | 1         | Indoor Air Pollution (All Cooking Fuels)               |
| Other pneumoconiosis                                | Female | 1-4 years | 95+ years | 1         | Elevation Over 1500m (proportion)                      |
| Other pneumoconiosis                                | Female | 1-4 years | 95+ years | 1         | Elevation 500 to 1500m (proportion)                    |
| Other pneumoconiosis                                | Female | 1-4 years | 95+ years | 1         | Smoking Prevalence                                     |
| Other pneumoconiosis                                | Female | 1-4 years | 95+ years | 1         | Log-transformed SEV scalar: Oth Pneum                  |
| Other pneumoconiosis                                | Female | 1-4 years | 95+ years | -1        | Socio-demographic Index                                |
| Other pneumoconiosis                                | Female | 1-4 years | 95+ years | -1        | Healthcare access and quality index                    |
| Asthma                                              | Female | 1-4 years | 95+ years | 1         | Cumulative Cigarettes (10 Years)                       |
| Asthma                                              | Female | 1-4 years | 95+ years | 1         | Cumulative Cigarettes (5 Years)                        |
| Asthma                                              | Female | 1-4 years | 95+ years | -1        | Education (years per capita)                           |
| Asthma                                              | Female | 1-4 years | 95+ years | -1        | LDI (I\$ per capita)                                   |
| Asthma                                              | Female | 1-4 years | 95+ years | 1         | Indoor Air Pollution (All Cooking Fuels)               |
| Asthma                                              | Female | 1-4 years | 95+ years | 1         | Outdoor Air Pollution (PM2.5)                          |
| Asthma                                              | Female | 1-4 years | 95+ years | 1         | Smoking Prevalence                                     |
| Asthma                                              | Female | 1-4 years | 95+ years | 1         | Log-transformed SEV scalar: Asthma                     |
| Asthma                                              | Female | 1-4 years | 95+ years | -1        | Socio-demographic Index                                |
| Asthma                                              | Female | 1-4 years | 95+ years | -1        | Healthcare access and quality index                    |
| Asthma                                              | Male   | 1-4 years | 95+ years | 1         | Cumulative Cigarettes (10 Years)                       |
| Asthma                                              | Male   | 1-4 years | 95+ years | 1         | Cumulative Cigarettes (5 Years)                        |
| Asthma                                              | Male   | 1-4 years | 95+ years | -1        | Education (years per capita)                           |
| Asthma                                              | Male   | 1-4 years | 95+ years | -1        | LDI (I\$ per capita)                                   |
| Asthma                                              | Male   | 1-4 years | 95+ years | 1         | Indoor Air Pollution (All Cooking Fuels)               |
| Asthma                                              | Male   | 1-4 years | 95+ years | 1         | Outdoor Air Pollution (PM2.5)                          |
| Asthma                                              | Male   | 1-4 years | 95+ years | 1         | Smoking Prevalence                                     |
| Asthma                                              | Male   | 1-4 years | 95+ years | 1         | Log-transformed SEV scalar: Asthma                     |
| Asthma                                              | Male   | 1-4 years | 95+ years | -1        | Socio-demographic Index                                |
| Asthma                                              | Male   | 1-4 years | 95+ years | -1        | Healthcare access and quality index                    |
| Interstitial lung disease and pulmonary sarcoidosis | Female | 1-4 years | 95+ years | 1         | Cumulative Cigarettes (5 Years)                        |
| Interstitial lung disease and pulmonary sarcoidosis | Female | 1-4 years | 95+ years | -1        | Education (years per capita)                           |
| Interstitial lung disease and pulmonary sarcoidosis | Female | 1-4 years | 95+ years | -1        | LDI (I\$ per capita)                                   |
| Interstitial lung disease and pulmonary sarcoidosis | Female | 1-4 years | 95+ years | 1         | Indoor Air Pollution (All Cooking Fuels)               |
| Interstitial lung disease and pulmonary sarcoidosis | Female | 1-4 years | 95+ years | 1         | Outdoor Air Pollution (PM2.5)                          |
| Interstitial lung disease and pulmonary sarcoidosis | Female | 1-4 years | 95+ years | 1         | Elevation Over 1500m (proportion)                      |
| Interstitial lung disease and pulmonary sarcoidosis | Female | 1-4 years | 95+ years | 1         | Elevation 500 to 1500m (proportion)                    |
| Interstitial lung disease and pulmonary sarcoidosis | Female | 1-4 years | 95+ years | 1         | Population Density (over 1000 ppl/sqkm, proportion)    |
| Interstitial lung disease and pulmonary sarcoidosis | Female | 1-4 years | 95+ years | 1         | Smoking Prevalence                                     |
| Interstitial lung disease and pulmonary sarcoidosis | Female | 1-4 years | 95+ years | 1         | Log-transformed SEV scalar: ILD                        |
| Interstitial lung disease and pulmonary sarcoidosis | Female | 1-4 years | 95+ years | 0         | Socio-demographic Index                                |
| Interstitial lung disease and pulmonary sarcoidosis | Female | 1-4 years | 95+ years | -1        | Healthcare access and quality index                    |
| Interstitial lung disease and pulmonary sarcoidosis | Male   | 1-4 years | 95+ years | 1         | Cumulative Cigarettes (5 Years)                        |
| Interstitial lung disease and pulmonary sarcoidosis | Male   | 1-4 years | 95+ years | -1        | Education (years per capita)                           |
| Interstitial lung disease and pulmonary sarcoidosis | Male   | 1-4 years | 95+ years | -1        | LDI (I\$ per capita)                                   |
| Interstitial lung disease and pulmonary sarcoidosis | Male   | 1-4 years | 95+ years | 1         | Indoor Air Pollution (All Cooking Fuels)               |
| Interstitial lung disease and pulmonary sarcoidosis | Male   | 1-4 years | 95+ years | 1         | Outdoor Air Pollution (PM2.5)                          |
| Interstitial lung disease and pulmonary sarcoidosis | Male   | 1-4 years | 95+ years | 1         | Elevation Over 1500m (proportion)                      |
| Interstitial lung disease and pulmonary sarcoidosis | Male   | 1-4 years | 95+ years | 1         | Elevation 500 to 1500m (proportion)                    |
| Interstitial lung disease and pulmonary sarcoidosis | Male   | 1-4 years | 95+ years | 1         | Population Density (over 1000 ppl/sqkm, proportion)    |
| Interstitial lung disease and pulmonary sarcoidosis | Male   | 1-4 years | 95+ years | 1         | Smoking Prevalence                                     |
| Interstitial lung disease and pulmonary sarcoidosis | Male   | 1-4 years | 95+ years | 1         | Log-transformed SEV scalar: ILD                        |
| Interstitial lung disease and pulmonary sarcoidosis | Male   | 1-4 years | 95+ years | 0         | Socio-demographic Index                                |
| Interstitial lung disease and pulmonary sarcoidosis | Male   | 1-4 years | 95+ years | -1        | Healthcare access and quality index                    |
| Other chronic respiratory diseases                  | Female | 1-4 years | 95+ years | 1         | Cumulative Cigarettes (5 Years)                        |
| Other chronic respiratory diseases                  | Female | 1-4 years | 95+ years | -1        | Education (years per capita)                           |

| Cause                                      | Sex    | Age start | Age end   | Direction | Covariate                                           |
|--------------------------------------------|--------|-----------|-----------|-----------|-----------------------------------------------------|
| Other chronic respiratory diseases         | Female | 1-4 years | 95+ years | -1        | LDI (IS per capita)                                 |
| Other chronic respiratory diseases         | Female | 1-4 years | 95+ years | 1         | Indoor Air Pollution (All Cooking Fuels)            |
| Other chronic respiratory diseases         | Female | 1-4 years | 95+ years | 1         | Outdoor Air Pollution (PM2.5)                       |
| Other chronic respiratory diseases         | Female | 1-4 years | 95+ years | 1         | Elevation Over 1500m (proportion)                   |
| Other chronic respiratory diseases         | Female | 1-4 years | 95+ years | 1         | Elevation 500 to 1500m (proportion)                 |
| Other chronic respiratory diseases         | Female | 1-4 years | 95+ years | 1         | Population Density (over 1000 ppl/sqkm, proportion) |
| Other chronic respiratory diseases         | Female | 1-4 years | 95+ years | 1         | Smoking Prevalence                                  |
| Other chronic respiratory diseases         | Female | 1-4 years | 95+ years | 1         | Log-transformed SEV scalar: Oth Resp                |
| Other chronic respiratory diseases         | Female | 1-4 years | 95+ years | -1        | Socio-demographic Index                             |
| Other chronic respiratory diseases         | Female | 1-4 years | 95+ years | -1        | Healthcare access and quality index                 |
| Other chronic respiratory diseases         | Male   | 1-4 years | 95+ years | 1         | Cumulative Cigarettes (5 Years)                     |
| Other chronic respiratory diseases         | Male   | 1-4 years | 95+ years | -1        | Education (years per capita)                        |
| Other chronic respiratory diseases         | Male   | 1-4 years | 95+ years | -1        | LDI (IS per capita)                                 |
| Other chronic respiratory diseases         | Male   | 1-4 years | 95+ years | 1         | Indoor Air Pollution (All Cooking Fuels)            |
| Other chronic respiratory diseases         | Male   | 1-4 years | 95+ years | 1         | Outdoor Air Pollution (PM2.5)                       |
| Other chronic respiratory diseases         | Male   | 1-4 years | 95+ years | 1         | Elevation Over 1500m (proportion)                   |
| Other chronic respiratory diseases         | Male   | 1-4 years | 95+ years | 1         | Elevation 500 to 1500m (proportion)                 |
| Other chronic respiratory diseases         | Male   | 1-4 years | 95+ years | 1         | Population Density (over 1000 ppl/sqkm, proportion) |
| Other chronic respiratory diseases         | Male   | 1-4 years | 95+ years | 1         | Smoking Prevalence                                  |
| Other chronic respiratory diseases         | Male   | 1-4 years | 95+ years | 1         | Log-transformed SEV scalar: Oth Resp                |
| Other chronic respiratory diseases         | Male   | 1-4 years | 95+ years | -1        | Socio-demographic Index                             |
| Other chronic respiratory diseases         | Male   | 1-4 years | 95+ years | -1        | Healthcare access and quality index                 |
| Cirrhosis and other chronic liver diseases | Male   | 1-4 years | 95+ years | 1         | Alcohol (liters per capita)                         |
| Cirrhosis and other chronic liver diseases | Male   | 1-4 years | 95+ years | 1         | Diabetes Age-Standardized Prevalence (proportion)   |
| Cirrhosis and other chronic liver diseases | Male   | 1-4 years | 95+ years | -1        | Education (years per capita)                        |
| Cirrhosis and other chronic liver diseases | Male   | 1-4 years | 95+ years | -1        | Health System Access 2 (unitless)                   |
| Cirrhosis and other chronic liver diseases | Male   | 1-4 years | 95+ years | -1        | LDI (IS per capita)                                 |
| Cirrhosis and other chronic liver diseases | Male   | 1-4 years | 95+ years | 1         | Mean BMI                                            |
| Cirrhosis and other chronic liver diseases | Male   | 1-4 years | 95+ years | 1         | Schistosomiasis Prevalence (proportion)             |
| Cirrhosis and other chronic liver diseases | Male   | 1-4 years | 95+ years | 0         | Socio-demographic Index                             |
| Cirrhosis and other chronic liver diseases | Male   | 1-4 years | 95+ years | 1         | Hepatitis B (HBsAg) Seroprevalence                  |
| Cirrhosis and other chronic liver diseases | Male   | 1-4 years | 95+ years | 1         | Hepatitis C (IgG) Seroprevalence                    |
| Cirrhosis and other chronic liver diseases | Male   | 1-4 years | 95+ years | -1        | Healthcare access and quality index                 |
| Cirrhosis and other chronic liver diseases | Female | 1-4 years | 95+ years | 1         | Alcohol (liters per capita)                         |
| Cirrhosis and other chronic liver diseases | Female | 1-4 years | 95+ years | 1         | Diabetes Age-Standardized Prevalence (proportion)   |
| Cirrhosis and other chronic liver diseases | Female | 1-4 years | 95+ years | -1        | Education (years per capita)                        |
| Cirrhosis and other chronic liver diseases | Female | 1-4 years | 95+ years | -1        | Health System Access 2 (unitless)                   |
| Cirrhosis and other chronic liver diseases | Female | 1-4 years | 95+ years | -1        | LDI (IS per capita)                                 |
| Cirrhosis and other chronic liver diseases | Female | 1-4 years | 95+ years | 1         | Mean BMI                                            |
| Cirrhosis and other chronic liver diseases | Female | 1-4 years | 95+ years | 1         | Schistosomiasis Prevalence (proportion)             |
| Cirrhosis and other chronic liver diseases | Female | 1-4 years | 95+ years | 0         | Socio-demographic Index                             |
| Cirrhosis and other chronic liver diseases | Female | 1-4 years | 95+ years | 1         | Hepatitis B (HBsAg) Seroprevalence                  |
| Cirrhosis and other chronic liver diseases | Female | 1-4 years | 95+ years | 1         | Hepatitis C (IgG) Seroprevalence                    |
| Cirrhosis and other chronic liver diseases | Female | 1-4 years | 95+ years | -1        | Healthcare access and quality index                 |
| Digestive diseases                         | Female | 0-6 days  | 95+ years | 1         | Alcohol (liters per capita)                         |
| Digestive diseases                         | Female | 0-6 days  | 95+ years | 1         | Cumulative Cigarettes (5 Years)                     |
| Digestive diseases                         | Female | 0-6 days  | 95+ years | -1        | Education (years per capita)                        |
| Digestive diseases                         | Female | 0-6 days  | 95+ years | -1        | LDI (IS per capita)                                 |
| Digestive diseases                         | Female | 0-6 days  | 95+ years | -1        | Sanitation (proportion with access)                 |
| Digestive diseases                         | Female | 0-6 days  | 95+ years | -1        | Socio-demographic Index                             |
| Digestive diseases                         | Female | 0-6 days  | 95+ years | -1        | fruits adjusted(g)                                  |
| Digestive diseases                         | Female | 0-6 days  | 95+ years | 1         | red meats adjusted(g)                               |
| Digestive diseases                         | Female | 0-6 days  | 95+ years | -1        | Healthcare access and quality index                 |
| Digestive diseases                         | Male   | 0-6 days  | 95+ years | 1         | Alcohol (liters per capita)                         |
| Digestive diseases                         | Male   | 0-6 days  | 95+ years | 1         | Cumulative Cigarettes (5 Years)                     |
| Digestive diseases                         | Male   | 0-6 days  | 95+ years | -1        | Education (years per capita)                        |
| Digestive diseases                         | Male   | 0-6 days  | 95+ years | -1        | LDI (IS per capita)                                 |
| Digestive diseases                         | Male   | 0-6 days  | 95+ years | -1        | Sanitation (proportion with access)                 |
| Digestive diseases                         | Male   | 0-6 days  | 95+ years | -1        | Socio-demographic Index                             |
| Digestive diseases                         | Male   | 0-6 days  | 95+ years | -1        | fruits adjusted(g)                                  |
| Digestive diseases                         | Male   | 0-6 days  | 95+ years | 1         | red meats adjusted(g)                               |
| Digestive diseases                         | Male   | 0-6 days  | 95+ years | -1        | Healthcare access and quality index                 |
| Peptic ulcer disease                       | Female | 1-4 years | 95+ years | 1         | Alcohol (liters per capita)                         |
| Peptic ulcer disease                       | Female | 1-4 years | 95+ years | 1         | Cumulative Cigarettes (10 Years)                    |
| Peptic ulcer disease                       | Female | 1-4 years | 95+ years | 1         | Cumulative Cigarettes (5 Years)                     |
| Peptic ulcer disease                       | Female | 1-4 years | 95+ years | -1        | LDI (IS per capita)                                 |
| Peptic ulcer disease                       | Female | 1-4 years | 95+ years | -1        | Sanitation (proportion with access)                 |
| Peptic ulcer disease                       | Female | 1-4 years | 95+ years | 1         | Smoking Prevalence                                  |
| Peptic ulcer disease                       | Female | 1-4 years | 95+ years | -1        | Maternal education (years per capita)               |
| Peptic ulcer disease                       | Female | 1-4 years | 95+ years | 1         | SEV unsafe water                                    |
| Peptic ulcer disease                       | Female | 1-4 years | 95+ years | -1        | Socio-demographic Index                             |
| Peptic ulcer disease                       | Female | 1-4 years | 95+ years | 0         | vegetables adjusted(g)                              |
| Peptic ulcer disease                       | Female | 1-4 years | 95+ years | -1        | Healthcare access and quality index                 |
| Peptic ulcer disease                       | Male   | 1-4 years | 95+ years | 1         | Alcohol (liters per capita)                         |
| Peptic ulcer disease                       | Male   | 1-4 years | 95+ years | 1         | Cumulative Cigarettes (10 Years)                    |
| Peptic ulcer disease                       | Male   | 1-4 years | 95+ years | 1         | Cumulative Cigarettes (5 Years)                     |
| Peptic ulcer disease                       | Male   | 1-4 years | 95+ years | -1        | LDI (IS per capita)                                 |
| Peptic ulcer disease                       | Male   | 1-4 years | 95+ years | -1        | Sanitation (proportion with access)                 |
| Peptic ulcer disease                       | Male   | 1-4 years | 95+ years | 1         | Smoking Prevalence                                  |
| Peptic ulcer disease                       | Male   | 1-4 years | 95+ years | -1        | Maternal education (years per capita)               |
| Peptic ulcer disease                       | Male   | 1-4 years | 95+ years | 1         | SEV unsafe water                                    |
| Peptic ulcer disease                       | Male   | 1-4 years | 95+ years | -1        | Socio-demographic Index                             |
| Peptic ulcer disease                       | Male   | 1-4 years | 95+ years | 0         | vegetables adjusted(g)                              |
| Peptic ulcer disease                       | Male   | 1-4 years | 95+ years | -1        | Healthcare access and quality index                 |
| Gastritis and duodenitis                   | Male   | 1-4 years | 95+ years | 1         | Alcohol (liters per capita)                         |
| Gastritis and duodenitis                   | Male   | 1-4 years | 95+ years | 1         | Cumulative Cigarettes (10 Years)                    |
| Gastritis and duodenitis                   | Male   | 1-4 years | 95+ years | 1         | Cumulative Cigarettes (5 Years)                     |
| Gastritis and duodenitis                   | Male   | 1-4 years | 95+ years | -1        | LDI (IS per capita)                                 |
| Gastritis and duodenitis                   | Male   | 1-4 years | 95+ years | -1        | Sanitation (proportion with access)                 |
| Gastritis and duodenitis                   | Male   | 1-4 years | 95+ years | 1         | Smoking Prevalence                                  |
| Gastritis and duodenitis                   | Male   | 1-4 years | 95+ years | 1         | SEV unsafe water                                    |

| Cause                                      | Sex    | Age start | Age end   | Direction | Covariate                                         |
|--------------------------------------------|--------|-----------|-----------|-----------|---------------------------------------------------|
| Gastritis and duodenitis                   | Male   | 1-4 years | 95+ years | -1        | Socio-demographic Index                           |
| Gastritis and duodenitis                   | Male   | 1-4 years | 95+ years | 0         | vegetables adjusted(g)                            |
| Gastritis and duodenitis                   | Male   | 1-4 years | 95+ years | -1        | Healthcare access and quality index               |
| Gastritis and duodenitis                   | Female | 1-4 years | 95+ years | 1         | Alcohol (liters per capita)                       |
| Gastritis and duodenitis                   | Female | 1-4 years | 95+ years | 1         | Cumulative Cigarettes (10 Years)                  |
| Gastritis and duodenitis                   | Female | 1-4 years | 95+ years | 1         | Cumulative Cigarettes (5 Years)                   |
| Gastritis and duodenitis                   | Female | 1-4 years | 95+ years | -1        | Education (years per capita)                      |
| Gastritis and duodenitis                   | Female | 1-4 years | 95+ years | -1        | LDI (I\$ per capita)                              |
| Gastritis and duodenitis                   | Female | 1-4 years | 95+ years | -1        | Sanitation (proportion with access)               |
| Gastritis and duodenitis                   | Female | 1-4 years | 95+ years | 1         | Smoking Prevalence                                |
| Gastritis and duodenitis                   | Female | 1-4 years | 95+ years | 1         | SEV unsafe water                                  |
| Gastritis and duodenitis                   | Female | 1-4 years | 95+ years | -1        | Socio-demographic Index                           |
| Gastritis and duodenitis                   | Female | 1-4 years | 95+ years | 0         | vegetables adjusted(g)                            |
| Gastritis and duodenitis                   | Female | 1-4 years | 95+ years | -1        | Healthcare access and quality index               |
| Appendicitis                               | Male   | 1-4 years | 95+ years | -1        | Education (years per capita)                      |
| Appendicitis                               | Male   | 1-4 years | 95+ years | -1        | LDI (I\$ per capita)                              |
| Appendicitis                               | Male   | 1-4 years | 95+ years | -1        | Health System Access (capped)                     |
| Appendicitis                               | Male   | 1-4 years | 95+ years | -1        | Socio-demographic Index                           |
| Appendicitis                               | Male   | 1-4 years | 95+ years | -1        | fruits adjusted(g)                                |
| Appendicitis                               | Male   | 1-4 years | 95+ years | -1        | vegetables adjusted(g)                            |
| Appendicitis                               | Male   | 1-4 years | 95+ years | -1        | Healthcare access and quality index               |
| Appendicitis                               | Female | 1-4 years | 95+ years | -1        | Education (years per capita)                      |
| Appendicitis                               | Female | 1-4 years | 95+ years | -1        | LDI (I\$ per capita)                              |
| Appendicitis                               | Female | 1-4 years | 95+ years | -1        | Health System Access (capped)                     |
| Appendicitis                               | Female | 1-4 years | 95+ years | -1        | Socio-demographic Index                           |
| Appendicitis                               | Female | 1-4 years | 95+ years | -1        | fruits adjusted(g)                                |
| Appendicitis                               | Female | 1-4 years | 95+ years | -1        | vegetables adjusted(g)                            |
| Appendicitis                               | Female | 1-4 years | 95+ years | -1        | Healthcare access and quality index               |
| Paralytic ileus and intestinal obstruction | Male   | 0-6 days  | 95+ years | -1        | Education (years per capita)                      |
| Paralytic ileus and intestinal obstruction | Male   | 0-6 days  | 95+ years | -1        | LDI (I\$ per capita)                              |
| Paralytic ileus and intestinal obstruction | Male   | 0-6 days  | 95+ years | -1        | Health System Access (capped)                     |
| Paralytic ileus and intestinal obstruction | Male   | 0-6 days  | 95+ years | -1        | Socio-demographic Index                           |
| Paralytic ileus and intestinal obstruction | Male   | 0-6 days  | 95+ years | -1        | fruits adjusted(g)                                |
| Paralytic ileus and intestinal obstruction | Male   | 0-6 days  | 95+ years | -1        | vegetables adjusted(g)                            |
| Paralytic ileus and intestinal obstruction | Male   | 0-6 days  | 95+ years | -1        | Healthcare access and quality index               |
| Paralytic ileus and intestinal obstruction | Female | 0-6 days  | 95+ years | -1        | Education (years per capita)                      |
| Paralytic ileus and intestinal obstruction | Female | 0-6 days  | 95+ years | -1        | LDI (I\$ per capita)                              |
| Paralytic ileus and intestinal obstruction | Female | 0-6 days  | 95+ years | -1        | Health System Access (capped)                     |
| Paralytic ileus and intestinal obstruction | Female | 0-6 days  | 95+ years | -1        | Socio-demographic Index                           |
| Paralytic ileus and intestinal obstruction | Female | 0-6 days  | 95+ years | -1        | fruits adjusted(g)                                |
| Paralytic ileus and intestinal obstruction | Female | 0-6 days  | 95+ years | -1        | vegetables adjusted(g)                            |
| Paralytic ileus and intestinal obstruction | Female | 0-6 days  | 95+ years | -1        | Healthcare access and quality index               |
| Inguinal, femoral, and abdominal hernia    | Female | 1-4 years | 95+ years | -1        | Education (years per capita)                      |
| Inguinal, femoral, and abdominal hernia    | Female | 1-4 years | 95+ years | -1        | LDI (I\$ per capita)                              |
| Inguinal, femoral, and abdominal hernia    | Female | 1-4 years | 95+ years | 0         | Socio-demographic Index                           |
| Inguinal, femoral, and abdominal hernia    | Female | 1-4 years | 95+ years | -1        | Healthcare access and quality index               |
| Inguinal, femoral, and abdominal hernia    | Male   | 1-4 years | 95+ years | -1        | Education (years per capita)                      |
| Inguinal, femoral, and abdominal hernia    | Male   | 1-4 years | 95+ years | -1        | LDI (I\$ per capita)                              |
| Inguinal, femoral, and abdominal hernia    | Male   | 1-4 years | 95+ years | 0         | Socio-demographic Index                           |
| Inguinal, femoral, and abdominal hernia    | Male   | 1-4 years | 95+ years | -1        | Healthcare access and quality index               |
| Inflammatory bowel disease                 | Male   | 1-4 years | 95+ years | -1        | Education (years per capita)                      |
| Inflammatory bowel disease                 | Male   | 1-4 years | 95+ years | 0         | LDI (I\$ per capita)                              |
| Inflammatory bowel disease                 | Male   | 1-4 years | 95+ years | -1        | Latitude 15 to 30 (proportion)                    |
| Inflammatory bowel disease                 | Male   | 1-4 years | 95+ years | 1         | Latitude 30 to 45 (proportion)                    |
| Inflammatory bowel disease                 | Male   | 1-4 years | 95+ years | 1         | Latitude Over 45 (proportion)                     |
| Inflammatory bowel disease                 | Male   | 1-4 years | 95+ years | 0         | Socio-demographic Index                           |
| Inflammatory bowel disease                 | Male   | 1-4 years | 95+ years | -1        | fruits adjusted(g)                                |
| Inflammatory bowel disease                 | Male   | 1-4 years | 95+ years | 1         | red meats adjusted(g)                             |
| Inflammatory bowel disease                 | Male   | 1-4 years | 95+ years | 1         | saturated fats adjusted(percent)                  |
| Inflammatory bowel disease                 | Male   | 1-4 years | 95+ years | -1        | vegetables adjusted(g)                            |
| Inflammatory bowel disease                 | Male   | 1-4 years | 95+ years | -1        | Healthcare access and quality index               |
| Inflammatory bowel disease                 | Female | 1-4 years | 95+ years | -1        | Education (years per capita)                      |
| Inflammatory bowel disease                 | Female | 1-4 years | 95+ years | 0         | LDI (I\$ per capita)                              |
| Inflammatory bowel disease                 | Female | 1-4 years | 95+ years | -1        | Latitude 15 to 30 (proportion)                    |
| Inflammatory bowel disease                 | Female | 1-4 years | 95+ years | 1         | Latitude 30 to 45 (proportion)                    |
| Inflammatory bowel disease                 | Female | 1-4 years | 95+ years | 1         | Latitude Over 45 (proportion)                     |
| Inflammatory bowel disease                 | Female | 1-4 years | 95+ years | 0         | Socio-demographic Index                           |
| Inflammatory bowel disease                 | Female | 1-4 years | 95+ years | -1        | fruits adjusted(g)                                |
| Inflammatory bowel disease                 | Female | 1-4 years | 95+ years | 1         | red meats adjusted(g)                             |
| Inflammatory bowel disease                 | Female | 1-4 years | 95+ years | 1         | saturated fats adjusted(percent)                  |
| Inflammatory bowel disease                 | Female | 1-4 years | 95+ years | -1        | vegetables adjusted(g)                            |
| Inflammatory bowel disease                 | Female | 1-4 years | 95+ years | -1        | Healthcare access and quality index               |
| Vascular intestinal disorders              | Female | 1-4 years | 95+ years | 1         | Alcohol (liters per capita)                       |
| Vascular intestinal disorders              | Female | 1-4 years | 95+ years | 1         | Diabetes Fasting Plasma Glucose (mmol/L)          |
| Vascular intestinal disorders              | Female | 1-4 years | 95+ years | 1         | Diabetes Age-Standardized Prevalence (proportion) |
| Vascular intestinal disorders              | Female | 1-4 years | 95+ years | -1        | Education (years per capita)                      |
| Vascular intestinal disorders              | Female | 1-4 years | 95+ years | -1        | LDI (I\$ per capita)                              |
| Vascular intestinal disorders              | Female | 1-4 years | 95+ years | 1         | Cholesterol (total, mean per capita)              |
| Vascular intestinal disorders              | Female | 1-4 years | 95+ years | 1         | Systolic Blood Pressure (mmHg)                    |
| Vascular intestinal disorders              | Female | 1-4 years | 95+ years | 1         | Latitude Over 45 (proportion)                     |
| Vascular intestinal disorders              | Female | 1-4 years | 95+ years | 0         | Socio-demographic Index                           |
| Vascular intestinal disorders              | Female | 1-4 years | 95+ years | -1        | fruits adjusted(g)                                |
| Vascular intestinal disorders              | Female | 1-4 years | 95+ years | 1         | saturated fats adjusted(percent)                  |
| Vascular intestinal disorders              | Female | 1-4 years | 95+ years | -1        | vegetables adjusted(g)                            |
| Vascular intestinal disorders              | Female | 1-4 years | 95+ years | -1        | Healthcare access and quality index               |
| Vascular intestinal disorders              | Male   | 1-4 years | 95+ years | 1         | Alcohol (liters per capita)                       |
| Vascular intestinal disorders              | Male   | 1-4 years | 95+ years | 1         | Diabetes Fasting Plasma Glucose (mmol/L)          |
| Vascular intestinal disorders              | Male   | 1-4 years | 95+ years | 1         | Diabetes Age-Standardized Prevalence (proportion) |
| Vascular intestinal disorders              | Male   | 1-4 years | 95+ years | -1        | Education (years per capita)                      |
| Vascular intestinal disorders              | Male   | 1-4 years | 95+ years | -1        | LDI (I\$ per capita)                              |
| Vascular intestinal disorders              | Male   | 1-4 years | 95+ years | 1         | Cholesterol (total, mean per capita)              |
| Vascular intestinal disorders              | Male   | 1-4 years | 95+ years | 1         | Systolic Blood Pressure (mmHg)                    |



| Cause                            | Sex    | Age start   | Age end   | Direction | Covariate                                         |
|----------------------------------|--------|-------------|-----------|-----------|---------------------------------------------------|
| Vascular intestinal disorders    | Male   | 1-4 years   | 95+ years | 1         | Latitude Over 45 (proportion)                     |
| Vascular intestinal disorders    | Male   | 1-4 years   | 95+ years | 0         | Socio-demographic Index                           |
| Vascular intestinal disorders    | Male   | 1-4 years   | 95+ years | -1        | fruits adjusted(g)                                |
| Vascular intestinal disorders    | Male   | 1-4 years   | 95+ years | 1         | saturated fats adjusted(percent)                  |
| Vascular intestinal disorders    | Male   | 1-4 years   | 95+ years | -1        | vegetables adjusted(g)                            |
| Vascular intestinal disorders    | Male   | 1-4 years   | 95+ years | -1        | Healthcare access and quality index               |
| Gallbladder and biliary diseases | Female | 1-4 years   | 95+ years | 1         | Alcohol (liters per capita)                       |
| Gallbladder and biliary diseases | Female | 1-4 years   | 95+ years | 0         | Education (years per capita)                      |
| Gallbladder and biliary diseases | Female | 1-4 years   | 95+ years | 0         | LDI (I\$ per capita)                              |
| Gallbladder and biliary diseases | Female | 1-4 years   | 95+ years | 1         | Mean BMI                                          |
| Gallbladder and biliary diseases | Female | 1-4 years   | 95+ years | 1         | Population Over 65 (proportion)                   |
| Gallbladder and biliary diseases | Female | 1-4 years   | 95+ years | 0         | Socio-demographic Index                           |
| Gallbladder and biliary diseases | Female | 1-4 years   | 95+ years | 1         | red meats adjusted(g)                             |
| Gallbladder and biliary diseases | Female | 1-4 years   | 95+ years | 1         | saturated fats adjusted(percent)                  |
| Gallbladder and biliary diseases | Female | 1-4 years   | 95+ years | -1        | Healthcare access and quality index               |
| Gallbladder and biliary diseases | Male   | 1-4 years   | 95+ years | 1         | Alcohol (liters per capita)                       |
| Gallbladder and biliary diseases | Male   | 1-4 years   | 95+ years | 0         | Education (years per capita)                      |
| Gallbladder and biliary diseases | Male   | 1-4 years   | 95+ years | 0         | LDI (I\$ per capita)                              |
| Gallbladder and biliary diseases | Male   | 1-4 years   | 95+ years | 1         | Mean BMI                                          |
| Gallbladder and biliary diseases | Male   | 1-4 years   | 95+ years | 1         | Population Over 65 (proportion)                   |
| Gallbladder and biliary diseases | Male   | 1-4 years   | 95+ years | 0         | Socio-demographic Index                           |
| Gallbladder and biliary diseases | Male   | 1-4 years   | 95+ years | 1         | red meats adjusted(g)                             |
| Gallbladder and biliary diseases | Male   | 1-4 years   | 95+ years | 1         | saturated fats adjusted(percent)                  |
| Gallbladder and biliary diseases | Male   | 1-4 years   | 95+ years | -1        | Healthcare access and quality index               |
| Gallbladder and biliary diseases | Male   | 1-4 years   | 95+ years | -1        | Health System Access (capped)                     |
| Pancreatitis                     | Female | 1-4 years   | 95+ years | 1         | Alcohol (liters per capita)                       |
| Pancreatitis                     | Female | 1-4 years   | 95+ years | -1        | Education (years per capita)                      |
| Pancreatitis                     | Female | 1-4 years   | 95+ years | 0         | LDI (I\$ per capita)                              |
| Pancreatitis                     | Female | 1-4 years   | 95+ years | 1         | Mean BMI                                          |
| Pancreatitis                     | Female | 1-4 years   | 95+ years | 1         | Log-transformed SEV scalar: Pancreatit            |
| Pancreatitis                     | Female | 1-4 years   | 95+ years | 0         | Socio-demographic Index                           |
| Pancreatitis                     | Female | 1-4 years   | 95+ years | -1        | Healthcare access and quality index               |
| Pancreatitis                     | Male   | 1-4 years   | 95+ years | 1         | Alcohol (liters per capita)                       |
| Pancreatitis                     | Male   | 1-4 years   | 95+ years | -1        | Education (years per capita)                      |
| Pancreatitis                     | Male   | 1-4 years   | 95+ years | 0         | LDI (I\$ per capita)                              |
| Pancreatitis                     | Male   | 1-4 years   | 95+ years | 1         | Mean BMI                                          |
| Pancreatitis                     | Male   | 1-4 years   | 95+ years | 1         | Log-transformed SEV scalar: Pancreatit            |
| Pancreatitis                     | Male   | 1-4 years   | 95+ years | 0         | Socio-demographic Index                           |
| Pancreatitis                     | Male   | 1-4 years   | 95+ years | -1        | Healthcare access and quality index               |
| Pancreatitis                     | Male   | 1-4 years   | 95+ years | -1        | Health System Access (capped)                     |
| Other digestive diseases         | Male   | 1-4 years   | 95+ years | 1         | Alcohol (liters per capita)                       |
| Other digestive diseases         | Male   | 1-4 years   | 95+ years | 1         | Cumulative Cigarettes (10 Years)                  |
| Other digestive diseases         | Male   | 1-4 years   | 95+ years | 1         | Cumulative Cigarettes (5 Years)                   |
| Other digestive diseases         | Male   | 1-4 years   | 95+ years | 1         | Diabetes Age-Standardized Prevalence (proportion) |
| Other digestive diseases         | Male   | 1-4 years   | 95+ years | -1        | Education (years per capita)                      |
| Other digestive diseases         | Male   | 1-4 years   | 95+ years | -1        | Health System Access 2 (unitless)                 |
| Other digestive diseases         | Male   | 1-4 years   | 95+ years | -1        | LDI (I\$ per capita)                              |
| Other digestive diseases         | Male   | 1-4 years   | 95+ years | 1         | Mean BMI                                          |
| Other digestive diseases         | Male   | 1-4 years   | 95+ years | -1        | Sanitation (proportion with access)               |
| Other digestive diseases         | Male   | 1-4 years   | 95+ years | 1         | Smoking Prevalence                                |
| Other digestive diseases         | Male   | 1-4 years   | 95+ years | -1        | Improved Water Source (proportion with access)    |
| Other digestive diseases         | Male   | 1-4 years   | 95+ years | 0         | Socio-demographic Index                           |
| Other digestive diseases         | Male   | 1-4 years   | 95+ years | -1        | fruits adjusted(g)                                |
| Other digestive diseases         | Male   | 1-4 years   | 95+ years | 1         | red meats adjusted(g)                             |
| Other digestive diseases         | Male   | 1-4 years   | 95+ years | 1         | saturated fats adjusted(percent)                  |
| Other digestive diseases         | Male   | 1-4 years   | 95+ years | 0         | vegetables adjusted(g)                            |
| Other digestive diseases         | Male   | 1-4 years   | 95+ years | -1        | Healthcare access and quality index               |
| Other digestive diseases         | Female | 1-4 years   | 95+ years | 1         | Alcohol (liters per capita)                       |
| Other digestive diseases         | Female | 1-4 years   | 95+ years | 1         | Cumulative Cigarettes (10 Years)                  |
| Other digestive diseases         | Female | 1-4 years   | 95+ years | 1         | Cumulative Cigarettes (5 Years)                   |
| Other digestive diseases         | Female | 1-4 years   | 95+ years | 1         | Diabetes Age-Standardized Prevalence (proportion) |
| Other digestive diseases         | Female | 1-4 years   | 95+ years | -1        | Education (years per capita)                      |
| Other digestive diseases         | Female | 1-4 years   | 95+ years | -1        | Health System Access 2 (unitless)                 |
| Other digestive diseases         | Female | 1-4 years   | 95+ years | -1        | LDI (I\$ per capita)                              |
| Other digestive diseases         | Female | 1-4 years   | 95+ years | 1         | Mean BMI                                          |
| Other digestive diseases         | Female | 1-4 years   | 95+ years | -1        | Sanitation (proportion with access)               |
| Other digestive diseases         | Female | 1-4 years   | 95+ years | 1         | Smoking Prevalence                                |
| Other digestive diseases         | Female | 1-4 years   | 95+ years | -1        | Improved Water Source (proportion with access)    |
| Other digestive diseases         | Female | 1-4 years   | 95+ years | 0         | Socio-demographic Index                           |
| Other digestive diseases         | Female | 1-4 years   | 95+ years | -1        | fruits adjusted(g)                                |
| Other digestive diseases         | Female | 1-4 years   | 95+ years | 1         | red meats adjusted(g)                             |
| Other digestive diseases         | Female | 1-4 years   | 95+ years | 1         | saturated fats adjusted(percent)                  |
| Other digestive diseases         | Female | 1-4 years   | 95+ years | 0         | vegetables adjusted(g)                            |
| Other digestive diseases         | Female | 1-4 years   | 95+ years | -1        | Healthcare access and quality index               |
| Epilepsy                         | Male   | 28-364 days | 95+ years | 1         | Cumulative Cigarettes (10 Years)                  |
| Epilepsy                         | Male   | 28-364 days | 95+ years | 1         | Cumulative Cigarettes (5 Years)                   |
| Epilepsy                         | Male   | 28-364 days | 95+ years | -1        | Education (years per capita)                      |
| Epilepsy                         | Male   | 28-364 days | 95+ years | -1        | LDI (I\$ per capita)                              |
| Epilepsy                         | Male   | 28-364 days | 95+ years | 1         | Mean BMI                                          |
| Epilepsy                         | Male   | 28-364 days | 95+ years | 1         | Cholesterol (total, mean per capita)              |
| Epilepsy                         | Male   | 28-364 days | 95+ years | 1         | Systolic Blood Pressure (mmHg)                    |
| Epilepsy                         | Male   | 28-364 days | 95+ years | 1         | Pig Meat (kg per capita)                          |
| Epilepsy                         | Male   | 28-364 days | 95+ years | 1         | Pigs (per capita)                                 |
| Epilepsy                         | Male   | 28-364 days | 95+ years | 1         | Log-transformed SEV scalar: Epilepsy              |
| Epilepsy                         | Male   | 28-364 days | 95+ years | -1        | Socio-demographic Index                           |
| Epilepsy                         | Male   | 28-364 days | 95+ years | -1        | Healthcare access and quality index               |
| Epilepsy                         | Female | 28-364 days | 95+ years | 1         | Cumulative Cigarettes (10 Years)                  |
| Epilepsy                         | Female | 28-364 days | 95+ years | 1         | Cumulative Cigarettes (5 Years)                   |
| Epilepsy                         | Female | 28-364 days | 95+ years | -1        | Education (years per capita)                      |
| Epilepsy                         | Female | 28-364 days | 95+ years | -1        | LDI (I\$ per capita)                              |
| Epilepsy                         | Female | 28-364 days | 95+ years | 1         | Mean BMI                                          |
| Epilepsy                         | Female | 28-364 days | 95+ years | 1         | Cholesterol (total, mean per capita)              |

| Cause                        | Sex    | Age start   | Age end   | Direction | Covariate                                              |
|------------------------------|--------|-------------|-----------|-----------|--------------------------------------------------------|
| Epilepsy                     | Female | 28-364 days | 95+ years | 1         | Systolic Blood Pressure (mmHg)                         |
| Epilepsy                     | Female | 28-364 days | 95+ years | 1         | Pig Meat (kg per capita)                               |
| Epilepsy                     | Female | 28-364 days | 95+ years | 1         | Pigs (per capita)                                      |
| Epilepsy                     | Female | 28-364 days | 95+ years | 1         | Log-transformed SEV scalar: Epilepsy                   |
| Epilepsy                     | Female | 28-364 days | 95+ years | -1        | Socio-demographic Index                                |
| Epilepsy                     | Female | 28-364 days | 95+ years | -1        | Healthcare access and quality index                    |
| Multiple sclerosis           | Female | 20-24 years | 95+ years | 1         | Absolute value of average latitude                     |
| Multiple sclerosis           | Female | 20-24 years | 95+ years | 1         | Cumulative Cigarettes (10 Years)                       |
| Multiple sclerosis           | Female | 20-24 years | 95+ years | 1         | Cumulative Cigarettes (5 Years)                        |
| Multiple sclerosis           | Female | 20-24 years | 95+ years | -1        | Education (years per capita)                           |
| Multiple sclerosis           | Female | 20-24 years | 95+ years | -1        | LDI (I\$ per capita)                                   |
| Multiple sclerosis           | Female | 20-24 years | 95+ years | 1         | Cholesterol (total, mean per capita)                   |
| Multiple sclerosis           | Female | 20-24 years | 95+ years | 1         | Smoking Prevalence                                     |
| Multiple sclerosis           | Female | 20-24 years | 95+ years | 1         | Socio-demographic Index                                |
| Multiple sclerosis           | Female | 20-24 years | 95+ years | -1        | Healthcare access and quality index                    |
| Multiple sclerosis           | Male   | 20-24 years | 95+ years | 1         | Absolute value of average latitude                     |
| Multiple sclerosis           | Male   | 20-24 years | 95+ years | 1         | Cumulative Cigarettes (10 Years)                       |
| Multiple sclerosis           | Male   | 20-24 years | 95+ years | 1         | Cumulative Cigarettes (5 Years)                        |
| Multiple sclerosis           | Male   | 20-24 years | 95+ years | -1        | Education (years per capita)                           |
| Multiple sclerosis           | Male   | 20-24 years | 95+ years | -1        | LDI (I\$ per capita)                                   |
| Multiple sclerosis           | Male   | 20-24 years | 95+ years | 1         | Cholesterol (total, mean per capita)                   |
| Multiple sclerosis           | Male   | 20-24 years | 95+ years | 1         | Smoking Prevalence                                     |
| Multiple sclerosis           | Male   | 20-24 years | 95+ years | 1         | Socio-demographic Index                                |
| Multiple sclerosis           | Male   | 20-24 years | 95+ years | -1        | Healthcare access and quality index                    |
| Motor neuron disease         | Male   | 0-6 days    | 95+ years | 1         | Absolute value of average latitude                     |
| Motor neuron disease         | Male   | 0-6 days    | 95+ years | 1         | Asbestos production (kg) per capita                    |
| Motor neuron disease         | Male   | 0-6 days    | 95+ years | 0         | Education (years per capita)                           |
| Motor neuron disease         | Male   | 0-6 days    | 95+ years | 0         | LDI (I\$ per capita)                                   |
| Motor neuron disease         | Male   | 0-6 days    | 95+ years | 0         | Cholesterol (total, mean per capita)                   |
| Motor neuron disease         | Male   | 0-6 days    | 95+ years | 0         | Sanitation (proportion with access)                    |
| Motor neuron disease         | Male   | 0-6 days    | 95+ years | 0         | Improved Water Source (proportion with access)         |
| Motor neuron disease         | Male   | 0-6 days    | 95+ years | 0         | Socio-demographic Index                                |
| Motor neuron disease         | Male   | 0-6 days    | 95+ years | 0         | fruits adjusted(g)                                     |
| Motor neuron disease         | Male   | 0-6 days    | 95+ years | -1        | Healthcare access and quality index                    |
| Motor neuron disease         | Female | 0-6 days    | 95+ years | 1         | Absolute value of average latitude                     |
| Motor neuron disease         | Female | 0-6 days    | 95+ years | 1         | Asbestos production (kg) per capita                    |
| Motor neuron disease         | Female | 0-6 days    | 95+ years | 0         | Education (years per capita)                           |
| Motor neuron disease         | Female | 0-6 days    | 95+ years | 0         | LDI (I\$ per capita)                                   |
| Motor neuron disease         | Female | 0-6 days    | 95+ years | 0         | Cholesterol (total, mean per capita)                   |
| Motor neuron disease         | Female | 0-6 days    | 95+ years | 0         | Sanitation (proportion with access)                    |
| Motor neuron disease         | Female | 0-6 days    | 95+ years | 0         | Improved Water Source (proportion with access)         |
| Motor neuron disease         | Female | 0-6 days    | 95+ years | 0         | Socio-demographic Index                                |
| Motor neuron disease         | Female | 0-6 days    | 95+ years | 0         | fruits adjusted(g)                                     |
| Motor neuron disease         | Female | 0-6 days    | 95+ years | -1        | Healthcare access and quality index                    |
| Other neurological disorders | Male   | 28-364 days | 95+ years | 1         | Alcohol (liters per capita)                            |
| Other neurological disorders | Male   | 28-364 days | 95+ years | 1         | Animal Fats (kcal per capita)                          |
| Other neurological disorders | Male   | 28-364 days | 95+ years | 1         | Cumulative Cigarettes (10 Years)                       |
| Other neurological disorders | Male   | 28-364 days | 95+ years | 1         | Cumulative Cigarettes (5 Years)                        |
| Other neurological disorders | Male   | 28-364 days | 95+ years | -1        | Education (years per capita)                           |
| Other neurological disorders | Male   | 28-364 days | 95+ years | -1        | LDI (I\$ per capita)                                   |
| Other neurological disorders | Male   | 28-364 days | 95+ years | 1         | Underweight (proportion <2SD weight for age, <5 years) |
| Other neurological disorders | Male   | 28-364 days | 95+ years | 1         | Mean BMI                                               |
| Other neurological disorders | Male   | 28-364 days | 95+ years | 1         | Cholesterol (total, mean per capita)                   |
| Other neurological disorders | Male   | 28-364 days | 95+ years | 1         | Systolic Blood Pressure (mmHg)                         |
| Other neurological disorders | Male   | 28-364 days | 95+ years | 1         | Pig Meat (kg per capita)                               |
| Other neurological disorders | Male   | 28-364 days | 95+ years | 1         | Population Density (over 1000 ppl/sqkm, proportion)    |
| Other neurological disorders | Male   | 28-364 days | 95+ years | 1         | Smoking Prevalence                                     |
| Other neurological disorders | Male   | 28-364 days | 95+ years | 0         | Socio-demographic Index                                |
| Other neurological disorders | Male   | 28-364 days | 95+ years | -1        | fruits adjusted(g)                                     |
| Other neurological disorders | Male   | 28-364 days | 95+ years | 1         | red meats adjusted(g)                                  |
| Other neurological disorders | Male   | 28-364 days | 95+ years | -1        | Healthcare access and quality index                    |
| Other neurological disorders | Female | 28-364 days | 95+ years | 1         | Alcohol (liters per capita)                            |
| Other neurological disorders | Female | 28-364 days | 95+ years | 1         | Animal Fats (kcal per capita)                          |
| Other neurological disorders | Female | 28-364 days | 95+ years | 1         | Cumulative Cigarettes (10 Years)                       |
| Other neurological disorders | Female | 28-364 days | 95+ years | 1         | Cumulative Cigarettes (5 Years)                        |
| Other neurological disorders | Female | 28-364 days | 95+ years | -1        | Education (years per capita)                           |
| Other neurological disorders | Female | 28-364 days | 95+ years | -1        | LDI (I\$ per capita)                                   |
| Other neurological disorders | Female | 28-364 days | 95+ years | 1         | Underweight (proportion <2SD weight for age, <5 years) |
| Other neurological disorders | Female | 28-364 days | 95+ years | 1         | Mean BMI                                               |
| Other neurological disorders | Female | 28-364 days | 95+ years | 1         | Cholesterol (total, mean per capita)                   |
| Other neurological disorders | Female | 28-364 days | 95+ years | 1         | Systolic Blood Pressure (mmHg)                         |
| Other neurological disorders | Female | 28-364 days | 95+ years | 1         | Pig Meat (kg per capita)                               |
| Other neurological disorders | Female | 28-364 days | 95+ years | 1         | Population Density (over 1000 ppl/sqkm, proportion)    |
| Other neurological disorders | Female | 28-364 days | 95+ years | 1         | Smoking Prevalence                                     |
| Other neurological disorders | Female | 28-364 days | 95+ years | 0         | Socio-demographic Index                                |
| Other neurological disorders | Female | 28-364 days | 95+ years | -1        | fruits adjusted(g)                                     |
| Other neurological disorders | Female | 28-364 days | 95+ years | 1         | red meats adjusted(g)                                  |
| Other neurological disorders | Female | 28-364 days | 95+ years | -1        | Healthcare access and quality index                    |
| Schizophrenia                | Male   | 25-29 years | 95+ years | 0         | Alcohol (liters per capita)                            |
| Schizophrenia                | Male   | 25-29 years | 95+ years | 0         | Cumulative Cigarettes (20 Years)                       |
| Schizophrenia                | Male   | 25-29 years | 95+ years | 0         | Education (years per capita)                           |
| Schizophrenia                | Male   | 25-29 years | 95+ years | 0         | Health System Access 2 (unitless)                      |
| Schizophrenia                | Male   | 25-29 years | 95+ years | 0         | LDI (I\$ per capita)                                   |
| Schizophrenia                | Male   | 25-29 years | 95+ years | 1         | Underweight (proportion <2SD weight for age, <5 years) |
| Schizophrenia                | Male   | 25-29 years | 95+ years | 0         | Smoking Prevalence                                     |
| Schizophrenia                | Male   | 25-29 years | 95+ years | 0         | Socio-demographic Index                                |
| Schizophrenia                | Female | 25-29 years | 95+ years | 0         | Alcohol (liters per capita)                            |
| Schizophrenia                | Female | 25-29 years | 95+ years | 0         | Cumulative Cigarettes (20 Years)                       |
| Schizophrenia                | Female | 25-29 years | 95+ years | 0         | Education (years per capita)                           |
| Schizophrenia                | Female | 25-29 years | 95+ years | 0         | Health System Access 2 (unitless)                      |
| Schizophrenia                | Female | 25-29 years | 95+ years | 0         | LDI (I\$ per capita)                                   |
| Schizophrenia                | Female | 25-29 years | 95+ years | 1         | Underweight (proportion <2SD weight for age, <5 years) |

| Cause                 | Sex    | Age start   | Age end   | Direction | Covariate                           |
|-----------------------|--------|-------------|-----------|-----------|-------------------------------------|
| Schizophrenia         | Female | 25-29 years | 95+ years | 0         | Smoking Prevalence                  |
| Schizophrenia         | Female | 25-29 years | 95+ years | 0         | Socio-demographic Index             |
| Alcohol use disorders | Male   | 15-19 years | 95+ years | 1         | Alcohol (liters per capita)         |
| Alcohol use disorders | Male   | 15-19 years | 95+ years | 0         | Cumulative Cigarettes (10 Years)    |
| Alcohol use disorders | Male   | 15-19 years | 95+ years | -1        | Education (years per capita)        |
| Alcohol use disorders | Male   | 15-19 years | 95+ years | -1        | Health System Access 2 (unitless)   |
| Alcohol use disorders | Male   | 15-19 years | 95+ years | -1        | LDI (I\$ per capita)                |
| Alcohol use disorders | Male   | 15-19 years | 95+ years | -1        | Religion (binary, >50% Muslim)      |
| Alcohol use disorders | Male   | 15-19 years | 95+ years | 0         | Smoking Prevalence                  |
| Alcohol use disorders | Male   | 15-19 years | 95+ years | 1         | Prevalence of binge drinking        |
| Alcohol use disorders | Male   | 15-19 years | 95+ years | 0         | Socio-demographic Index             |
| Alcohol use disorders | Male   | 15-19 years | 95+ years | -1        | Healthcare access and quality index |
| Alcohol use disorders | Female | 15-19 years | 95+ years | 1         | Alcohol (liters per capita)         |
| Alcohol use disorders | Female | 15-19 years | 95+ years | 0         | Cumulative Cigarettes (10 Years)    |
| Alcohol use disorders | Female | 15-19 years | 95+ years | -1        | Education (years per capita)        |
| Alcohol use disorders | Female | 15-19 years | 95+ years | -1        | Health System Access 2 (unitless)   |
| Alcohol use disorders | Female | 15-19 years | 95+ years | -1        | LDI (I\$ per capita)                |
| Alcohol use disorders | Female | 15-19 years | 95+ years | -1        | Religion (binary, >50% Muslim)      |
| Alcohol use disorders | Female | 15-19 years | 95+ years | 0         | Smoking Prevalence                  |
| Alcohol use disorders | Female | 15-19 years | 95+ years | 1         | Prevalence of binge drinking        |
| Alcohol use disorders | Female | 15-19 years | 95+ years | 0         | Socio-demographic Index             |
| Alcohol use disorders | Female | 15-19 years | 95+ years | -1        | Healthcare access and quality index |
| Drug use disorders    | Male   | 15-19 years | 95+ years | 1         | Alcohol (liters per capita)         |
| Drug use disorders    | Male   | 15-19 years | 95+ years | 1         | Cumulative Cigarettes (10 Years)    |
| Drug use disorders    | Male   | 15-19 years | 95+ years | 1         | Cumulative Cigarettes (5 Years)     |
| Drug use disorders    | Male   | 15-19 years | 95+ years | 0         | Education (years per capita)        |
| Drug use disorders    | Male   | 15-19 years | 95+ years | 0         | LDI (I\$ per capita)                |
| Drug use disorders    | Male   | 15-19 years | 95+ years | 1         | Opium Cultivation (binary)          |
| Drug use disorders    | Male   | 15-19 years | 95+ years | 1         | Smoking Prevalence                  |
| Drug use disorders    | Male   | 15-19 years | 95+ years | 0         | Socio-demographic Index             |
| Drug use disorders    | Male   | 15-19 years | 95+ years | -1        | Healthcare access and quality index |
| Drug use disorders    | Female | 15-19 years | 95+ years | 1         | Alcohol (liters per capita)         |
| Drug use disorders    | Female | 15-19 years | 95+ years | 1         | Cumulative Cigarettes (10 Years)    |
| Drug use disorders    | Female | 15-19 years | 95+ years | 1         | Cumulative Cigarettes (5 Years)     |
| Drug use disorders    | Female | 15-19 years | 95+ years | 0         | Education (years per capita)        |
| Drug use disorders    | Female | 15-19 years | 95+ years | 0         | LDI (I\$ per capita)                |
| Drug use disorders    | Female | 15-19 years | 95+ years | 1         | Opium Cultivation (binary)          |
| Drug use disorders    | Female | 15-19 years | 95+ years | 1         | Smoking Prevalence                  |
| Drug use disorders    | Female | 15-19 years | 95+ years | 0         | Socio-demographic Index             |
| Drug use disorders    | Female | 15-19 years | 95+ years | -1        | Healthcare access and quality index |
| Drug use disorders    | Male   | 0-6 days    | 7-27 days | 1         | Alcohol (liters per capita)         |
| Drug use disorders    | Male   | 0-6 days    | 7-27 days | 1         | Cumulative Cigarettes (10 Years)    |
| Drug use disorders    | Male   | 0-6 days    | 7-27 days | 1         | Cumulative Cigarettes (5 Years)     |
| Drug use disorders    | Male   | 0-6 days    | 7-27 days | 0         | Education (years per capita)        |
| Drug use disorders    | Male   | 0-6 days    | 7-27 days | 0         | Health System Access 2 (unitless)   |
| Drug use disorders    | Male   | 0-6 days    | 7-27 days | 0         | LDI (I\$ per capita)                |
| Drug use disorders    | Male   | 0-6 days    | 7-27 days | 1         | Opium Cultivation (binary)          |
| Drug use disorders    | Male   | 0-6 days    | 7-27 days | 1         | Smoking Prevalence                  |
| Drug use disorders    | Male   | 0-6 days    | 7-27 days | 0         | Socio-demographic Index             |
| Drug use disorders    | Male   | 0-6 days    | 7-27 days | -1        | Healthcare access and quality index |
| Drug use disorders    | Female | 0-6 days    | 7-27 days | 1         | Alcohol (liters per capita)         |
| Drug use disorders    | Female | 0-6 days    | 7-27 days | 1         | Cumulative Cigarettes (10 Years)    |
| Drug use disorders    | Female | 0-6 days    | 7-27 days | 1         | Cumulative Cigarettes (5 Years)     |
| Drug use disorders    | Female | 0-6 days    | 7-27 days | 0         | Education (years per capita)        |
| Drug use disorders    | Female | 0-6 days    | 7-27 days | 0         | Health System Access 2 (unitless)   |
| Drug use disorders    | Female | 0-6 days    | 7-27 days | 0         | LDI (I\$ per capita)                |
| Drug use disorders    | Female | 0-6 days    | 7-27 days | 1         | Opium Cultivation (binary)          |
| Drug use disorders    | Female | 0-6 days    | 7-27 days | 1         | Smoking Prevalence                  |
| Drug use disorders    | Female | 0-6 days    | 7-27 days | 0         | Socio-demographic Index             |
| Drug use disorders    | Female | 0-6 days    | 7-27 days | -1        | Healthcare access and quality index |
| Opioid use disorders  | Male   | 15-19 years | 95+ years | 1         | Alcohol (liters per capita)         |
| Opioid use disorders  | Male   | 15-19 years | 95+ years | 1         | Cumulative Cigarettes (10 Years)    |
| Opioid use disorders  | Male   | 15-19 years | 95+ years | 1         | Cumulative Cigarettes (5 Years)     |
| Opioid use disorders  | Male   | 15-19 years | 95+ years | 0         | Education (years per capita)        |
| Opioid use disorders  | Male   | 15-19 years | 95+ years | 0         | LDI (I\$ per capita)                |
| Opioid use disorders  | Male   | 15-19 years | 95+ years | 1         | Opium Cultivation (binary)          |
| Opioid use disorders  | Male   | 15-19 years | 95+ years | 1         | Smoking Prevalence                  |
| Opioid use disorders  | Male   | 15-19 years | 95+ years | 0         | Socio-demographic Index             |
| Opioid use disorders  | Male   | 15-19 years | 95+ years | -1        | Healthcare access and quality index |
| Opioid use disorders  | Female | 15-19 years | 95+ years | 1         | Alcohol (liters per capita)         |
| Opioid use disorders  | Female | 15-19 years | 95+ years | 1         | Cumulative Cigarettes (10 Years)    |
| Opioid use disorders  | Female | 15-19 years | 95+ years | 1         | Cumulative Cigarettes (5 Years)     |
| Opioid use disorders  | Female | 15-19 years | 95+ years | 0         | Education (years per capita)        |
| Opioid use disorders  | Female | 15-19 years | 95+ years | 0         | LDI (I\$ per capita)                |
| Opioid use disorders  | Female | 15-19 years | 95+ years | 1         | Opium Cultivation (binary)          |
| Opioid use disorders  | Female | 15-19 years | 95+ years | 1         | Smoking Prevalence                  |
| Opioid use disorders  | Female | 15-19 years | 95+ years | 0         | Socio-demographic Index             |
| Opioid use disorders  | Female | 15-19 years | 95+ years | -1        | Healthcare access and quality index |
| Opioid use disorders  | Male   | 0-6 days    | 7-27 days | 1         | Alcohol (liters per capita)         |
| Opioid use disorders  | Male   | 0-6 days    | 7-27 days | 1         | Cumulative Cigarettes (10 Years)    |
| Opioid use disorders  | Male   | 0-6 days    | 7-27 days | 1         | Cumulative Cigarettes (5 Years)     |
| Opioid use disorders  | Male   | 0-6 days    | 7-27 days | 0         | Education (years per capita)        |
| Opioid use disorders  | Male   | 0-6 days    | 7-27 days | 0         | LDI (I\$ per capita)                |
| Opioid use disorders  | Male   | 0-6 days    | 7-27 days | 1         | Opium Cultivation (binary)          |
| Opioid use disorders  | Male   | 0-6 days    | 7-27 days | 1         | Smoking Prevalence                  |
| Opioid use disorders  | Male   | 0-6 days    | 7-27 days | 0         | Socio-demographic Index             |
| Opioid use disorders  | Male   | 0-6 days    | 7-27 days | -1        | Healthcare access and quality index |
| Opioid use disorders  | Female | 0-6 days    | 7-27 days | 1         | Alcohol (liters per capita)         |
| Opioid use disorders  | Female | 0-6 days    | 7-27 days | 1         | Cumulative Cigarettes (10 Years)    |
| Opioid use disorders  | Female | 0-6 days    | 7-27 days | 1         | Cumulative Cigarettes (5 Years)     |
| Opioid use disorders  | Female | 0-6 days    | 7-27 days | 0         | Education (years per capita)        |
| Opioid use disorders  | Female | 0-6 days    | 7-27 days | 0         | LDI (I\$ per capita)                |

| Cause                     | Sex    | Age start   | Age end     | Direction | Covariate                                              |
|---------------------------|--------|-------------|-------------|-----------|--------------------------------------------------------|
| Opioid use disorders      | Female | 0-6 days    | 7-27 days   | 1         | Opium Cultivation (binary)                             |
| Opioid use disorders      | Female | 0-6 days    | 7-27 days   | 1         | Smoking Prevalence                                     |
| Opioid use disorders      | Female | 0-6 days    | 7-27 days   | 0         | Socio-demographic Index                                |
| Opioid use disorders      | Female | 0-6 days    | 7-27 days   | -1        | Healthcare access and quality index                    |
| Opioid use disorders      | Male   | 0-6 days    | 7-27 days   | 0         | Health System Access 2 (unitless)                      |
| Opioid use disorders      | Female | 0-6 days    | 7-27 days   | 0         | Health System Access 2 (unitless)                      |
| Cocaine use disorders     | Male   | 15-19 years | 95+ years   | 1         | Alcohol (liters per capita)                            |
| Cocaine use disorders     | Male   | 15-19 years | 95+ years   | 1         | Cumulative Cigarettes (10 Years)                       |
| Cocaine use disorders     | Male   | 15-19 years | 95+ years   | 1         | Cumulative Cigarettes (5 Years)                        |
| Cocaine use disorders     | Male   | 15-19 years | 95+ years   | 0         | Education (years per capita)                           |
| Cocaine use disorders     | Male   | 15-19 years | 95+ years   | 0         | LDI (I\$ per capita)                                   |
| Cocaine use disorders     | Male   | 15-19 years | 95+ years   | 1         | Smoking Prevalence                                     |
| Cocaine use disorders     | Male   | 15-19 years | 95+ years   | 1         | Socio-demographic Index                                |
| Cocaine use disorders     | Male   | 15-19 years | 95+ years   | -1        | Healthcare access and quality index                    |
| Cocaine use disorders     | Female | 15-19 years | 95+ years   | 1         | Alcohol (liters per capita)                            |
| Cocaine use disorders     | Female | 15-19 years | 95+ years   | 1         | Cumulative Cigarettes (10 Years)                       |
| Cocaine use disorders     | Female | 15-19 years | 95+ years   | 1         | Cumulative Cigarettes (5 Years)                        |
| Cocaine use disorders     | Female | 15-19 years | 95+ years   | 0         | Education (years per capita)                           |
| Cocaine use disorders     | Female | 15-19 years | 95+ years   | 0         | LDI (I\$ per capita)                                   |
| Cocaine use disorders     | Female | 15-19 years | 95+ years   | 1         | Smoking Prevalence                                     |
| Cocaine use disorders     | Female | 15-19 years | 95+ years   | 1         | Socio-demographic Index                                |
| Cocaine use disorders     | Female | 15-19 years | 95+ years   | -1        | Healthcare access and quality index                    |
| Amphetamine use disorders | Male   | 15-19 years | 95+ years   | 1         | Alcohol (liters per capita)                            |
| Amphetamine use disorders | Male   | 15-19 years | 95+ years   | 1         | Cumulative Cigarettes (10 Years)                       |
| Amphetamine use disorders | Male   | 15-19 years | 95+ years   | 0         | Education (years per capita)                           |
| Amphetamine use disorders | Male   | 15-19 years | 95+ years   | 0         | LDI (I\$ per capita)                                   |
| Amphetamine use disorders | Male   | 15-19 years | 95+ years   | 1         | Smoking Prevalence                                     |
| Amphetamine use disorders | Male   | 15-19 years | 95+ years   | 1         | Socio-demographic Index                                |
| Amphetamine use disorders | Male   | 15-19 years | 95+ years   | -1        | Healthcare access and quality index                    |
| Amphetamine use disorders | Female | 15-19 years | 95+ years   | 1         | Alcohol (liters per capita)                            |
| Amphetamine use disorders | Female | 15-19 years | 95+ years   | 1         | Cumulative Cigarettes (10 Years)                       |
| Amphetamine use disorders | Female | 15-19 years | 95+ years   | 1         | Cumulative Cigarettes (5 Years)                        |
| Amphetamine use disorders | Female | 15-19 years | 95+ years   | 0         | Education (years per capita)                           |
| Amphetamine use disorders | Female | 15-19 years | 95+ years   | 0         | LDI (I\$ per capita)                                   |
| Amphetamine use disorders | Female | 15-19 years | 95+ years   | 1         | Smoking Prevalence                                     |
| Amphetamine use disorders | Female | 15-19 years | 95+ years   | 1         | Socio-demographic Index                                |
| Amphetamine use disorders | Female | 15-19 years | 95+ years   | -1        | Healthcare access and quality index                    |
| Other drug use disorders  | Male   | 15-19 years | 95+ years   | 1         | Alcohol (liters per capita)                            |
| Other drug use disorders  | Male   | 15-19 years | 95+ years   | 1         | Cumulative Cigarettes (10 Years)                       |
| Other drug use disorders  | Male   | 15-19 years | 95+ years   | 1         | Cumulative Cigarettes (5 Years)                        |
| Other drug use disorders  | Male   | 15-19 years | 95+ years   | 0         | Education (years per capita)                           |
| Other drug use disorders  | Male   | 15-19 years | 95+ years   | 0         | LDI (I\$ per capita)                                   |
| Other drug use disorders  | Male   | 15-19 years | 95+ years   | 1         | Smoking Prevalence                                     |
| Other drug use disorders  | Male   | 15-19 years | 95+ years   | 0         | Socio-demographic Index                                |
| Other drug use disorders  | Male   | 15-19 years | 95+ years   | -1        | Healthcare access and quality index                    |
| Other drug use disorders  | Female | 15-19 years | 95+ years   | 1         | Alcohol (liters per capita)                            |
| Other drug use disorders  | Female | 15-19 years | 95+ years   | 1         | Cumulative Cigarettes (10 Years)                       |
| Other drug use disorders  | Female | 15-19 years | 95+ years   | 1         | Cumulative Cigarettes (5 Years)                        |
| Other drug use disorders  | Female | 15-19 years | 95+ years   | 0         | Education (years per capita)                           |
| Other drug use disorders  | Female | 15-19 years | 95+ years   | 0         | LDI (I\$ per capita)                                   |
| Other drug use disorders  | Female | 15-19 years | 95+ years   | 1         | Smoking Prevalence                                     |
| Other drug use disorders  | Female | 15-19 years | 95+ years   | 0         | Socio-demographic Index                                |
| Other drug use disorders  | Female | 15-19 years | 95+ years   | -1        | Healthcare access and quality index                    |
| Eating disorders          | Male   | 5-9 years   | 45-49 years | 1         | Education (years per capita)                           |
| Eating disorders          | Male   | 5-9 years   | 45-49 years | 1         | LDI (I\$ per capita)                                   |
| Eating disorders          | Male   | 5-9 years   | 45-49 years | -1        | Underweight (proportion <2SD weight for age, <5 years) |
| Eating disorders          | Male   | 5-9 years   | 45-49 years | 1         | Sanitation (proportion with access)                    |
| Eating disorders          | Male   | 5-9 years   | 45-49 years | 1         | Maternal education (years per capita)                  |
| Eating disorders          | Male   | 5-9 years   | 45-49 years | 1         | Socio-demographic Index                                |
| Eating disorders          | Male   | 5-9 years   | 45-49 years | -1        | Healthcare access and quality index                    |
| Eating disorders          | Female | 5-9 years   | 45-49 years | 1         | Education (years per capita)                           |
| Eating disorders          | Female | 5-9 years   | 45-49 years | 1         | LDI (I\$ per capita)                                   |
| Eating disorders          | Female | 5-9 years   | 45-49 years | -1        | Underweight (proportion <2SD weight for age, <5 years) |
| Eating disorders          | Female | 5-9 years   | 45-49 years | 1         | Sanitation (proportion with access)                    |
| Eating disorders          | Female | 5-9 years   | 45-49 years | 1         | Maternal education (years per capita)                  |
| Eating disorders          | Female | 5-9 years   | 45-49 years | 1         | Socio-demographic Index                                |
| Eating disorders          | Female | 5-9 years   | 45-49 years | -1        | Healthcare access and quality index                    |
| Anorexia nervosa          | Male   | 5-9 years   | 45-49 years | 1         | Education (years per capita)                           |
| Anorexia nervosa          | Male   | 5-9 years   | 45-49 years | 1         | LDI (I\$ per capita)                                   |
| Anorexia nervosa          | Male   | 5-9 years   | 45-49 years | -1        | Underweight (proportion <2SD weight for age, <5 years) |
| Anorexia nervosa          | Male   | 5-9 years   | 45-49 years | 1         | Sanitation (proportion with access)                    |
| Anorexia nervosa          | Male   | 5-9 years   | 45-49 years | 1         | Maternal education (years per capita)                  |
| Anorexia nervosa          | Male   | 5-9 years   | 45-49 years | 1         | Socio-demographic Index                                |
| Anorexia nervosa          | Male   | 5-9 years   | 45-49 years | -1        | Healthcare access and quality index                    |
| Anorexia nervosa          | Female | 5-9 years   | 45-49 years | 1         | Education (years per capita)                           |
| Anorexia nervosa          | Female | 5-9 years   | 45-49 years | 1         | LDI (I\$ per capita)                                   |
| Anorexia nervosa          | Female | 5-9 years   | 45-49 years | -1        | Underweight (proportion <2SD weight for age, <5 years) |
| Anorexia nervosa          | Female | 5-9 years   | 45-49 years | 1         | Sanitation (proportion with access)                    |
| Anorexia nervosa          | Female | 5-9 years   | 45-49 years | 1         | Maternal education (years per capita)                  |
| Anorexia nervosa          | Female | 5-9 years   | 45-49 years | 1         | Socio-demographic Index                                |
| Anorexia nervosa          | Female | 5-9 years   | 45-49 years | -1        | Healthcare access and quality index                    |
| Bulimia nervosa           | Male   | 5-9 years   | 45-49 years | 1         | Education (years per capita)                           |
| Bulimia nervosa           | Male   | 5-9 years   | 45-49 years | 1         | LDI (I\$ per capita)                                   |
| Bulimia nervosa           | Male   | 5-9 years   | 45-49 years | -1        | Underweight (proportion <2SD weight for age, <5 years) |
| Bulimia nervosa           | Male   | 5-9 years   | 45-49 years | 1         | Sanitation (proportion with access)                    |
| Bulimia nervosa           | Male   | 5-9 years   | 45-49 years | 1         | Maternal education (years per capita)                  |
| Bulimia nervosa           | Male   | 5-9 years   | 45-49 years | 1         | Socio-demographic Index                                |
| Bulimia nervosa           | Male   | 5-9 years   | 45-49 years | -1        | Healthcare access and quality index                    |
| Bulimia nervosa           | Female | 5-9 years   | 45-49 years | 1         | Education (years per capita)                           |
| Bulimia nervosa           | Female | 5-9 years   | 45-49 years | 1         | LDI (I\$ per capita)                                   |
| Bulimia nervosa           | Female | 5-9 years   | 45-49 years | -1        | Underweight (proportion <2SD weight for age, <5 years) |

| Cause                    | Sex    | Age start   | Age end     | Direction | Covariate                                         |
|--------------------------|--------|-------------|-------------|-----------|---------------------------------------------------|
| Bulimia nervosa          | Female | 5-9 years   | 45-49 years | 1         | Sanitation (proportion with access)               |
| Bulimia nervosa          | Female | 5-9 years   | 45-49 years | 1         | Maternal education (years per capita)             |
| Bulimia nervosa          | Female | 5-9 years   | 45-49 years | 1         | Socio-demographic Index                           |
| Bulimia nervosa          | Female | 5-9 years   | 45-49 years | -1        | Healthcare access and quality index               |
| Diabetes mellitus        | Female | 0-6 days    | 20-24 years | 0         | Animal Fats (kcal per capita)                     |
| Diabetes mellitus        | Female | 0-6 days    | 20-24 years | 1         | Diabetes Fasting Plasma Glucose (mmol/L)          |
| Diabetes mellitus        | Female | 0-6 days    | 20-24 years | 1         | Diabetes Age-Standardized Prevalence (proportion) |
| Diabetes mellitus        | Female | 0-6 days    | 20-24 years | 0         | Education (years per capita)                      |
| Diabetes mellitus        | Female | 0-6 days    | 20-24 years | 0         | LDI (IS per capita)                               |
| Diabetes mellitus        | Female | 0-6 days    | 20-24 years | 0         | Mean BMI                                          |
| Diabetes mellitus        | Female | 0-6 days    | 20-24 years | 0         | Cholesterol (total, mean per capita)              |
| Diabetes mellitus        | Female | 0-6 days    | 20-24 years | 0         | Systolic Blood Pressure (mmHg)                    |
| Diabetes mellitus        | Female | 0-6 days    | 20-24 years | 0         | fruits adjusted(g)                                |
| Diabetes mellitus        | Female | 0-6 days    | 20-24 years | 0         | vegetables adjusted(g)                            |
| Diabetes mellitus        | Female | 0-6 days    | 20-24 years | 0         | whole grains adjusted(g)                          |
| Diabetes mellitus        | Female | 0-6 days    | 20-24 years | 0         | energy unadjusted(kcal)                           |
| Diabetes mellitus        | Female | 0-6 days    | 20-24 years | 0         | Healthcare access and quality index               |
| Diabetes mellitus        | Male   | 0-6 days    | 20-24 years | 0         | Animal Fats (kcal per capita)                     |
| Diabetes mellitus        | Male   | 0-6 days    | 20-24 years | 1         | Diabetes Fasting Plasma Glucose (mmol/L)          |
| Diabetes mellitus        | Male   | 0-6 days    | 20-24 years | 1         | Diabetes Age-Standardized Prevalence (proportion) |
| Diabetes mellitus        | Male   | 0-6 days    | 20-24 years | 0         | Education (years per capita)                      |
| Diabetes mellitus        | Male   | 0-6 days    | 20-24 years | 0         | LDI (IS per capita)                               |
| Diabetes mellitus        | Male   | 0-6 days    | 20-24 years | 0         | Mean BMI                                          |
| Diabetes mellitus        | Male   | 0-6 days    | 20-24 years | 0         | Cholesterol (total, mean per capita)              |
| Diabetes mellitus        | Male   | 0-6 days    | 20-24 years | 0         | Systolic Blood Pressure (mmHg)                    |
| Diabetes mellitus        | Male   | 0-6 days    | 20-24 years | 0         | fruits adjusted(g)                                |
| Diabetes mellitus        | Male   | 0-6 days    | 20-24 years | 0         | vegetables adjusted(g)                            |
| Diabetes mellitus        | Male   | 0-6 days    | 20-24 years | 0         | whole grains adjusted(g)                          |
| Diabetes mellitus        | Male   | 0-6 days    | 20-24 years | 0         | energy unadjusted(kcal)                           |
| Diabetes mellitus        | Male   | 0-6 days    | 20-24 years | 0         | Healthcare access and quality index               |
| Diabetes mellitus        | Male   | 25-29 years | 95+ years   | 0         | Animal Fats (kcal per capita)                     |
| Diabetes mellitus        | Male   | 25-29 years | 95+ years   | 1         | Diabetes Fasting Plasma Glucose (mmol/L)          |
| Diabetes mellitus        | Male   | 25-29 years | 95+ years   | 1         | Diabetes Age-Standardized Prevalence (proportion) |
| Diabetes mellitus        | Male   | 25-29 years | 95+ years   | 0         | Education (years per capita)                      |
| Diabetes mellitus        | Male   | 25-29 years | 95+ years   | 0         | LDI (IS per capita)                               |
| Diabetes mellitus        | Male   | 25-29 years | 95+ years   | 0         | Mean BMI                                          |
| Diabetes mellitus        | Male   | 25-29 years | 95+ years   | 0         | Cholesterol (total, mean per capita)              |
| Diabetes mellitus        | Male   | 25-29 years | 95+ years   | 0         | Systolic Blood Pressure (mmHg)                    |
| Diabetes mellitus        | Male   | 25-29 years | 95+ years   | 0         | fruits adjusted(g)                                |
| Diabetes mellitus        | Male   | 25-29 years | 95+ years   | 0         | vegetables adjusted(g)                            |
| Diabetes mellitus        | Male   | 25-29 years | 95+ years   | 0         | whole grains adjusted(g)                          |
| Diabetes mellitus        | Male   | 25-29 years | 95+ years   | 0         | energy unadjusted(kcal)                           |
| Diabetes mellitus        | Male   | 25-29 years | 95+ years   | 0         | Healthcare access and quality index               |
| Diabetes mellitus        | Female | 25-29 years | 95+ years   | 0         | Animal Fats (kcal per capita)                     |
| Diabetes mellitus        | Female | 25-29 years | 95+ years   | 1         | Diabetes Fasting Plasma Glucose (mmol/L)          |
| Diabetes mellitus        | Female | 25-29 years | 95+ years   | 1         | Diabetes Age-Standardized Prevalence (proportion) |
| Diabetes mellitus        | Female | 25-29 years | 95+ years   | 0         | Education (years per capita)                      |
| Diabetes mellitus        | Female | 25-29 years | 95+ years   | 0         | LDI (IS per capita)                               |
| Diabetes mellitus        | Female | 25-29 years | 95+ years   | 0         | Mean BMI                                          |
| Diabetes mellitus        | Female | 25-29 years | 95+ years   | 0         | Cholesterol (total, mean per capita)              |
| Diabetes mellitus        | Female | 25-29 years | 95+ years   | 0         | Systolic Blood Pressure (mmHg)                    |
| Diabetes mellitus        | Female | 25-29 years | 95+ years   | 0         | fruits adjusted(g)                                |
| Diabetes mellitus        | Female | 25-29 years | 95+ years   | 0         | vegetables adjusted(g)                            |
| Diabetes mellitus        | Female | 25-29 years | 95+ years   | 0         | whole grains adjusted(g)                          |
| Diabetes mellitus        | Female | 25-29 years | 95+ years   | 0         | energy unadjusted(kcal)                           |
| Diabetes mellitus        | Female | 25-29 years | 95+ years   | 0         | Healthcare access and quality index               |
| Acute glomerulonephritis | Female | 28-364 days | 95+ years   | 1         | Diabetes Age-Standardized Prevalence (proportion) |
| Acute glomerulonephritis | Female | 28-364 days | 95+ years   | -1        | Education (years per capita)                      |
| Acute glomerulonephritis | Female | 28-364 days | 95+ years   | -1        | LDI (IS per capita)                               |
| Acute glomerulonephritis | Female | 28-364 days | 95+ years   | 1         | Systolic Blood Pressure (mmHg)                    |
| Acute glomerulonephritis | Female | 28-364 days | 95+ years   | -1        | Sanitation (proportion with access)               |
| Acute glomerulonephritis | Female | 28-364 days | 95+ years   | -1        | Improved Water Source (proportion with access)    |
| Acute glomerulonephritis | Female | 28-364 days | 95+ years   | -1        | Socio-demographic Index                           |
| Acute glomerulonephritis | Female | 28-364 days | 95+ years   | -1        | Healthcare access and quality index               |
| Acute glomerulonephritis | Male   | 28-364 days | 95+ years   | 1         | Diabetes Age-Standardized Prevalence (proportion) |
| Acute glomerulonephritis | Male   | 28-364 days | 95+ years   | -1        | Education (years per capita)                      |
| Acute glomerulonephritis | Male   | 28-364 days | 95+ years   | -1        | LDI (IS per capita)                               |
| Acute glomerulonephritis | Male   | 28-364 days | 95+ years   | 1         | Systolic Blood Pressure (mmHg)                    |
| Acute glomerulonephritis | Male   | 28-364 days | 95+ years   | -1        | Sanitation (proportion with access)               |
| Acute glomerulonephritis | Male   | 28-364 days | 95+ years   | -1        | Improved Water Source (proportion with access)    |
| Acute glomerulonephritis | Male   | 28-364 days | 95+ years   | -1        | Socio-demographic Index                           |
| Acute glomerulonephritis | Male   | 28-364 days | 95+ years   | -1        | Healthcare access and quality index               |
| Chronic kidney disease   | Female | 28-364 days | 95+ years   | 1         | Diabetes Fasting Plasma Glucose (mmol/L)          |
| Chronic kidney disease   | Female | 28-364 days | 95+ years   | 1         | Diabetes Age-Standardized Prevalence (proportion) |
| Chronic kidney disease   | Female | 28-364 days | 95+ years   | -1        | Education (years per capita)                      |
| Chronic kidney disease   | Female | 28-364 days | 95+ years   | -1        | LDI (IS per capita)                               |
| Chronic kidney disease   | Female | 28-364 days | 95+ years   | 1         | Mean BMI                                          |
| Chronic kidney disease   | Female | 28-364 days | 95+ years   | 1         | Cholesterol (total, mean per capita)              |
| Chronic kidney disease   | Female | 28-364 days | 95+ years   | 1         | Systolic Blood Pressure (mmHg)                    |
| Chronic kidney disease   | Female | 28-364 days | 95+ years   | 0         | Socio-demographic Index                           |
| Chronic kidney disease   | Female | 28-364 days | 95+ years   | 0         | red meats adjusted(g)                             |
| Chronic kidney disease   | Female | 28-364 days | 95+ years   | 0         | whole grains adjusted(g)                          |
| Chronic kidney disease   | Female | 28-364 days | 95+ years   | 1         | energy unadjusted(kcal)                           |
| Chronic kidney disease   | Female | 28-364 days | 95+ years   | -1        | Healthcare access and quality index               |
| Chronic kidney disease   | Male   | 28-364 days | 95+ years   | 1         | Diabetes Fasting Plasma Glucose (mmol/L)          |
| Chronic kidney disease   | Male   | 28-364 days | 95+ years   | 1         | Diabetes Age-Standardized Prevalence (proportion) |
| Chronic kidney disease   | Male   | 28-364 days | 95+ years   | -1        | Education (years per capita)                      |
| Chronic kidney disease   | Male   | 28-364 days | 95+ years   | -1        | LDI (IS per capita)                               |
| Chronic kidney disease   | Male   | 28-364 days | 95+ years   | 1         | Mean BMI                                          |
| Chronic kidney disease   | Male   | 28-364 days | 95+ years   | 1         | Cholesterol (total, mean per capita)              |
| Chronic kidney disease   | Male   | 28-364 days | 95+ years   | 1         | Systolic Blood Pressure (mmHg)                    |
| Chronic kidney disease   | Male   | 28-364 days | 95+ years   | 0         | Socio-demographic Index                           |

| Cause                                               | Sex    | Age start   | Age end     | Direction | Covariate                                                       |
|-----------------------------------------------------|--------|-------------|-------------|-----------|-----------------------------------------------------------------|
| Chronic kidney disease                              | Male   | 28-364 days | 95+ years   | 0         | red meats adjusted(g)                                           |
| Chronic kidney disease                              | Male   | 28-364 days | 95+ years   | 0         | whole grains adjusted(g)                                        |
| Chronic kidney disease                              | Male   | 28-364 days | 95+ years   | 1         | energy unadjusted(kcal)                                         |
| Chronic kidney disease                              | Male   | 28-364 days | 95+ years   | -1        | Healthcare access and quality index                             |
| Urinary diseases and male infertility               | Male   | 0-6 days    | 95+ years   | -1        | Education (years per capita)                                    |
| Urinary diseases and male infertility               | Male   | 0-6 days    | 95+ years   | -1        | LDI (I\$ per capita)                                            |
| Urinary diseases and male infertility               | Male   | 0-6 days    | 95+ years   | 1         | Mean BMI                                                        |
| Urinary diseases and male infertility               | Male   | 0-6 days    | 95+ years   | 0         | Latitude Under 15 (proportion)                                  |
| Urinary diseases and male infertility               | Male   | 0-6 days    | 95+ years   | 0         | Latitude 15 to 30 (proportion)                                  |
| Urinary diseases and male infertility               | Male   | 0-6 days    | 95+ years   | 0         | Latitude 30 to 45 (proportion)                                  |
| Urinary diseases and male infertility               | Male   | 0-6 days    | 95+ years   | 0         | Latitude Over 45 (proportion)                                   |
| Urinary diseases and male infertility               | Male   | 0-6 days    | 95+ years   | 0         | Socio-demographic Index                                         |
| Urinary diseases and male infertility               | Male   | 0-6 days    | 95+ years   | -1        | Healthcare access and quality index                             |
| Urinary diseases and male infertility               | Female | 0-6 days    | 95+ years   | -1        | Education (years per capita)                                    |
| Urinary diseases and male infertility               | Female | 0-6 days    | 95+ years   | -1        | LDI (I\$ per capita)                                            |
| Urinary diseases and male infertility               | Female | 0-6 days    | 95+ years   | 1         | Mean BMI                                                        |
| Urinary diseases and male infertility               | Female | 0-6 days    | 95+ years   | 0         | Latitude Under 15 (proportion)                                  |
| Urinary diseases and male infertility               | Female | 0-6 days    | 95+ years   | 0         | Latitude 15 to 30 (proportion)                                  |
| Urinary diseases and male infertility               | Female | 0-6 days    | 95+ years   | 0         | Latitude 30 to 45 (proportion)                                  |
| Urinary diseases and male infertility               | Female | 0-6 days    | 95+ years   | 0         | Latitude Over 45 (proportion)                                   |
| Urinary diseases and male infertility               | Female | 0-6 days    | 95+ years   | 0         | Socio-demographic Index                                         |
| Urinary diseases and male infertility               | Female | 0-6 days    | 95+ years   | -1        | Healthcare access and quality index                             |
| Interstitial nephritis and urinary tract infections | Female | 0-6 days    | 95+ years   | -1        | Education (years per capita)                                    |
| Interstitial nephritis and urinary tract infections | Female | 0-6 days    | 95+ years   | -1        | LDI (I\$ per capita)                                            |
| Interstitial nephritis and urinary tract infections | Female | 0-6 days    | 95+ years   | 1         | Sanitation (proportion with access)                             |
| Interstitial nephritis and urinary tract infections | Female | 0-6 days    | 95+ years   | 0         | Socio-demographic Index                                         |
| Interstitial nephritis and urinary tract infections | Female | 0-6 days    | 95+ years   | -1        | Healthcare access and quality index                             |
| Interstitial nephritis and urinary tract infections | Male   | 0-6 days    | 95+ years   | -1        | Education (years per capita)                                    |
| Interstitial nephritis and urinary tract infections | Male   | 0-6 days    | 95+ years   | -1        | LDI (I\$ per capita)                                            |
| Interstitial nephritis and urinary tract infections | Male   | 0-6 days    | 95+ years   | 1         | Sanitation (proportion with access)                             |
| Interstitial nephritis and urinary tract infections | Male   | 0-6 days    | 95+ years   | -1        | Health System Access (capped)                                   |
| Interstitial nephritis and urinary tract infections | Male   | 0-6 days    | 95+ years   | 0         | Socio-demographic Index                                         |
| Interstitial nephritis and urinary tract infections | Male   | 0-6 days    | 95+ years   | -1        | Healthcare access and quality index                             |
| Urolithiasis                                        | Female | 5-9 years   | 95+ years   | -1        | Education (years per capita)                                    |
| Urolithiasis                                        | Female | 5-9 years   | 95+ years   | -1        | LDI (I\$ per capita)                                            |
| Urolithiasis                                        | Female | 5-9 years   | 95+ years   | 1         | 90th percentile climatic temperature in the given country-year. |
| Urolithiasis                                        | Female | 5-9 years   | 95+ years   | 0         | Socio-demographic Index                                         |
| Urolithiasis                                        | Female | 5-9 years   | 95+ years   | -1        | fruits adjusted(g)                                              |
| Urolithiasis                                        | Female | 5-9 years   | 95+ years   | 1         | red meats adjusted(g)                                           |
| Urolithiasis                                        | Female | 5-9 years   | 95+ years   | -1        | vegetables adjusted(g)                                          |
| Urolithiasis                                        | Female | 5-9 years   | 95+ years   | 1         | Healthcare access and quality index                             |
| Urolithiasis                                        | Male   | 5-9 years   | 95+ years   | -1        | Education (years per capita)                                    |
| Urolithiasis                                        | Male   | 5-9 years   | 95+ years   | -1        | LDI (I\$ per capita)                                            |
| Urolithiasis                                        | Male   | 5-9 years   | 95+ years   | 1         | 90th percentile climatic temperature in the given country-year. |
| Urolithiasis                                        | Male   | 5-9 years   | 95+ years   | 0         | Socio-demographic Index                                         |
| Urolithiasis                                        | Male   | 5-9 years   | 95+ years   | -1        | fruits adjusted(g)                                              |
| Urolithiasis                                        | Male   | 5-9 years   | 95+ years   | 1         | red meats adjusted(g)                                           |
| Urolithiasis                                        | Male   | 5-9 years   | 95+ years   | -1        | vegetables adjusted(g)                                          |
| Urolithiasis                                        | Male   | 5-9 years   | 95+ years   | -1        | Healthcare access and quality index                             |
| Other urinary diseases                              | Male   | 0-6 days    | 95+ years   | -1        | Education (years per capita)                                    |
| Other urinary diseases                              | Male   | 0-6 days    | 95+ years   | -1        | LDI (I\$ per capita)                                            |
| Other urinary diseases                              | Male   | 0-6 days    | 95+ years   | 1         | Mean BMI                                                        |
| Other urinary diseases                              | Male   | 0-6 days    | 95+ years   | 0         | Socio-demographic Index                                         |
| Other urinary diseases                              | Male   | 0-6 days    | 95+ years   | -1        | Healthcare access and quality index                             |
| Other urinary diseases                              | Female | 0-6 days    | 95+ years   | 1         | Education (years per capita)                                    |
| Other urinary diseases                              | Female | 0-6 days    | 95+ years   | 1         | LDI (I\$ per capita)                                            |
| Other urinary diseases                              | Female | 0-6 days    | 95+ years   | 1         | Mean BMI                                                        |
| Other urinary diseases                              | Female | 0-6 days    | 95+ years   | 0         | Socio-demographic Index                                         |
| Other urinary diseases                              | Female | 0-6 days    | 95+ years   | -1        | Healthcare access and quality index                             |
| Gynecological diseases                              | Female | 15-19 years | 95+ years   | -1        | Education (years per capita)                                    |
| Gynecological diseases                              | Female | 15-19 years | 95+ years   | -1        | LDI (I\$ per capita)                                            |
| Gynecological diseases                              | Female | 15-19 years | 95+ years   | 1         | Live Births 35+ (proportion)                                    |
| Gynecological diseases                              | Female | 15-19 years | 95+ years   | -1        | Skilled Birth Attendance (proportion)                           |
| Gynecological diseases                              | Female | 15-19 years | 95+ years   | 0         | Smoking Prevalence                                              |
| Gynecological diseases                              | Female | 15-19 years | 95+ years   | 1         | Total Fertility Rate                                            |
| Gynecological diseases                              | Female | 15-19 years | 95+ years   | -1        | Health System Access (capped)                                   |
| Gynecological diseases                              | Female | 15-19 years | 95+ years   | -1        | Socio-demographic Index                                         |
| Gynecological diseases                              | Female | 15-19 years | 95+ years   | -1        | Healthcare access and quality index                             |
| Uterine fibroids                                    | Female | 15-19 years | 95+ years   | -1        | Education (years per capita)                                    |
| Uterine fibroids                                    | Female | 15-19 years | 95+ years   | -1        | LDI (I\$ per capita)                                            |
| Uterine fibroids                                    | Female | 15-19 years | 95+ years   | 1         | Live Births 35+ (proportion)                                    |
| Uterine fibroids                                    | Female | 15-19 years | 95+ years   | -1        | Skilled Birth Attendance (proportion)                           |
| Uterine fibroids                                    | Female | 15-19 years | 95+ years   | 0         | Smoking Prevalence                                              |
| Uterine fibroids                                    | Female | 15-19 years | 95+ years   | 1         | Total Fertility Rate                                            |
| Uterine fibroids                                    | Female | 15-19 years | 95+ years   | -1        | Health System Access (capped)                                   |
| Uterine fibroids                                    | Female | 15-19 years | 95+ years   | -1        | Socio-demographic Index                                         |
| Uterine fibroids                                    | Female | 15-19 years | 95+ years   | -1        | Healthcare access and quality index                             |
| Polycystic ovarian syndrome                         | Female | 15-19 years | 50-54 years | -1        | Education (years per capita)                                    |
| Polycystic ovarian syndrome                         | Female | 15-19 years | 50-54 years | -1        | LDI (I\$ per capita)                                            |
| Polycystic ovarian syndrome                         | Female | 15-19 years | 50-54 years | 1         | Live Births 35+ (proportion)                                    |
| Polycystic ovarian syndrome                         | Female | 15-19 years | 50-54 years | -1        | Skilled Birth Attendance (proportion)                           |
| Polycystic ovarian syndrome                         | Female | 15-19 years | 50-54 years | 0         | Smoking Prevalence                                              |
| Polycystic ovarian syndrome                         | Female | 15-19 years | 50-54 years | 1         | Total Fertility Rate                                            |
| Polycystic ovarian syndrome                         | Female | 15-19 years | 50-54 years | -1        | Health System Access (capped)                                   |
| Polycystic ovarian syndrome                         | Female | 15-19 years | 50-54 years | -1        | Socio-demographic Index                                         |
| Polycystic ovarian syndrome                         | Female | 15-19 years | 50-54 years | -1        | Healthcare access and quality index                             |
| Endometriosis                                       | Female | 15-19 years | 50-54 years | -1        | Education (years per capita)                                    |
| Endometriosis                                       | Female | 15-19 years | 50-54 years | -1        | LDI (I\$ per capita)                                            |
| Endometriosis                                       | Female | 15-19 years | 50-54 years | 1         | Live Births 35+ (proportion)                                    |
| Endometriosis                                       | Female | 15-19 years | 50-54 years | -1        | Skilled Birth Attendance (proportion)                           |
| Endometriosis                                       | Female | 15-19 years | 50-54 years | 0         | Smoking Prevalence                                              |
| Endometriosis                                       | Female | 15-19 years | 50-54 years | 1         | Total Fertility Rate                                            |

| Cause                                             | Sex    | Age start   | Age end     | Direction | Covariate                                                                    |
|---------------------------------------------------|--------|-------------|-------------|-----------|------------------------------------------------------------------------------|
| Endometriosis                                     | Female | 15-19 years | 50-54 years | -1        | Health System Access (capped)                                                |
| Endometriosis                                     | Female | 15-19 years | 50-54 years | -1        | Socio-demographic Index                                                      |
| Endometriosis                                     | Female | 15-19 years | 50-54 years | -1        | Healthcare access and quality index                                          |
| Genital prolapse                                  | Female | 15-19 years | 95+ years   | -1        | Education (years per capita)                                                 |
| Genital prolapse                                  | Female | 15-19 years | 95+ years   | -1        | LDI (IS per capita)                                                          |
| Genital prolapse                                  | Female | 15-19 years | 95+ years   | 1         | Live Births 35+ (proportion)                                                 |
| Genital prolapse                                  | Female | 15-19 years | 95+ years   | -1        | Skilled Birth Attendance (proportion)                                        |
| Genital prolapse                                  | Female | 15-19 years | 95+ years   | 0         | Smoking Prevalence                                                           |
| Genital prolapse                                  | Female | 15-19 years | 95+ years   | 1         | Total Fertility Rate                                                         |
| Genital prolapse                                  | Female | 15-19 years | 95+ years   | -1        | Health System Access (capped)                                                |
| Genital prolapse                                  | Female | 15-19 years | 95+ years   | -1        | Socio-demographic Index                                                      |
| Genital prolapse                                  | Female | 15-19 years | 95+ years   | -1        | Healthcare access and quality index                                          |
| Other gynecological diseases                      | Female | 15-19 years | 95+ years   | -1        | Education (years per capita)                                                 |
| Other gynecological diseases                      | Female | 15-19 years | 95+ years   | -1        | LDI (IS per capita)                                                          |
| Other gynecological diseases                      | Female | 15-19 years | 95+ years   | 1         | Live Births 35+ (proportion)                                                 |
| Other gynecological diseases                      | Female | 15-19 years | 95+ years   | -1        | Skilled Birth Attendance (proportion)                                        |
| Other gynecological diseases                      | Female | 15-19 years | 95+ years   | 0         | Smoking Prevalence                                                           |
| Other gynecological diseases                      | Female | 15-19 years | 95+ years   | 1         | Total Fertility Rate                                                         |
| Other gynecological diseases                      | Female | 15-19 years | 95+ years   | -1        | Health System Access (capped)                                                |
| Other gynecological diseases                      | Female | 15-19 years | 95+ years   | -1        | Socio-demographic Index                                                      |
| Other gynecological diseases                      | Female | 15-19 years | 95+ years   | -1        | Healthcare access and quality index                                          |
| Hemoglobinopathies and hemolytic anemias          | Male   | 0-6 days    | 5-9 years   | -1        | Education (years per capita)                                                 |
| Hemoglobinopathies and hemolytic anemias          | Male   | 0-6 days    | 5-9 years   | -1        | LDI (IS per capita)                                                          |
| Hemoglobinopathies and hemolytic anemias          | Male   | 0-6 days    | 5-9 years   | 1         | Latitude Under 15 (proportion)                                               |
| Hemoglobinopathies and hemolytic anemias          | Male   | 0-6 days    | 5-9 years   | 1         | Latitude 15 to 30 (proportion)                                               |
| Hemoglobinopathies and hemolytic anemias          | Male   | 0-6 days    | 5-9 years   | 0         | Latitude 30 to 45 (proportion)                                               |
| Hemoglobinopathies and hemolytic anemias          | Male   | 0-6 days    | 5-9 years   | -1        | Latitude Over 45 (proportion)                                                |
| Hemoglobinopathies and hemolytic anemias          | Male   | 0-6 days    | 5-9 years   | 1         | Malaria Lysenko PFPR 1 (Holoendemic)                                         |
| Hemoglobinopathies and hemolytic anemias          | Male   | 0-6 days    | 5-9 years   | 1         | Hemoglobinopathies Prevalence x Excess Mortality                             |
| Hemoglobinopathies and hemolytic anemias          | Male   | 0-6 days    | 5-9 years   | -1        | Health System Access (capped)                                                |
| Hemoglobinopathies and hemolytic anemias          | Male   | 0-6 days    | 5-9 years   | 1         | Hemoglobinopathies Prevalence x Excess Mortality (excluding G6PD deficiency) |
| Hemoglobinopathies and hemolytic anemias          | Male   | 0-6 days    | 5-9 years   | -1        | Socio-demographic Index                                                      |
| Hemoglobinopathies and hemolytic anemias          | Male   | 0-6 days    | 5-9 years   | -1        | Healthcare access and quality index                                          |
| Hemoglobinopathies and hemolytic anemias          | Female | 0-6 days    | 5-9 years   | -1        | Education (years per capita)                                                 |
| Hemoglobinopathies and hemolytic anemias          | Female | 0-6 days    | 5-9 years   | -1        | LDI (IS per capita)                                                          |
| Hemoglobinopathies and hemolytic anemias          | Female | 0-6 days    | 5-9 years   | 1         | Latitude Under 15 (proportion)                                               |
| Hemoglobinopathies and hemolytic anemias          | Female | 0-6 days    | 5-9 years   | 1         | Latitude 15 to 30 (proportion)                                               |
| Hemoglobinopathies and hemolytic anemias          | Female | 0-6 days    | 5-9 years   | 0         | Latitude 30 to 45 (proportion)                                               |
| Hemoglobinopathies and hemolytic anemias          | Female | 0-6 days    | 5-9 years   | -1        | Latitude Over 45 (proportion)                                                |
| Hemoglobinopathies and hemolytic anemias          | Female | 0-6 days    | 5-9 years   | 1         | Malaria Lysenko PFPR 1 (Holoendemic)                                         |
| Hemoglobinopathies and hemolytic anemias          | Female | 0-6 days    | 5-9 years   | 1         | Hemoglobinopathies Prevalence x Excess Mortality                             |
| Hemoglobinopathies and hemolytic anemias          | Female | 0-6 days    | 5-9 years   | -1        | Health System Access (capped)                                                |
| Hemoglobinopathies and hemolytic anemias          | Female | 0-6 days    | 5-9 years   | 1         | Hemoglobinopathies Prevalence x Excess Mortality (excluding G6PD deficiency) |
| Hemoglobinopathies and hemolytic anemias          | Female | 0-6 days    | 5-9 years   | -1        | Socio-demographic Index                                                      |
| Hemoglobinopathies and hemolytic anemias          | Female | 0-6 days    | 5-9 years   | -1        | Healthcare access and quality index                                          |
| Hemoglobinopathies and hemolytic anemias          | Male   | 10-14 years | 95+ years   | -1        | Education (years per capita)                                                 |
| Hemoglobinopathies and hemolytic anemias          | Male   | 10-14 years | 95+ years   | -1        | LDI (IS per capita)                                                          |
| Hemoglobinopathies and hemolytic anemias          | Male   | 10-14 years | 95+ years   | 1         | Latitude Under 15 (proportion)                                               |
| Hemoglobinopathies and hemolytic anemias          | Male   | 10-14 years | 95+ years   | 1         | Latitude 15 to 30 (proportion)                                               |
| Hemoglobinopathies and hemolytic anemias          | Male   | 10-14 years | 95+ years   | 0         | Latitude 30 to 45 (proportion)                                               |
| Hemoglobinopathies and hemolytic anemias          | Male   | 10-14 years | 95+ years   | -1        | Latitude Over 45 (proportion)                                                |
| Hemoglobinopathies and hemolytic anemias          | Male   | 10-14 years | 95+ years   | 1         | Malaria Lysenko PFPR 1 (Holoendemic)                                         |
| Hemoglobinopathies and hemolytic anemias          | Male   | 10-14 years | 95+ years   | 1         | Hemoglobinopathies Prevalence x Excess Mortality                             |
| Hemoglobinopathies and hemolytic anemias          | Male   | 10-14 years | 95+ years   | -1        | Health System Access (capped)                                                |
| Hemoglobinopathies and hemolytic anemias          | Male   | 10-14 years | 95+ years   | 1         | Hemoglobinopathies Prevalence x Excess Mortality (excluding G6PD deficiency) |
| Hemoglobinopathies and hemolytic anemias          | Male   | 10-14 years | 95+ years   | -1        | Socio-demographic Index                                                      |
| Hemoglobinopathies and hemolytic anemias          | Male   | 10-14 years | 95+ years   | -1        | Healthcare access and quality index                                          |
| Hemoglobinopathies and hemolytic anemias          | Female | 10-14 years | 95+ years   | -1        | Education (years per capita)                                                 |
| Hemoglobinopathies and hemolytic anemias          | Female | 10-14 years | 95+ years   | -1        | LDI (IS per capita)                                                          |
| Hemoglobinopathies and hemolytic anemias          | Female | 10-14 years | 95+ years   | 1         | Latitude Under 15 (proportion)                                               |
| Hemoglobinopathies and hemolytic anemias          | Female | 10-14 years | 95+ years   | 1         | Latitude 15 to 30 (proportion)                                               |
| Hemoglobinopathies and hemolytic anemias          | Female | 10-14 years | 95+ years   | 0         | Latitude 30 to 45 (proportion)                                               |
| Hemoglobinopathies and hemolytic anemias          | Female | 10-14 years | 95+ years   | -1        | Latitude Over 45 (proportion)                                                |
| Hemoglobinopathies and hemolytic anemias          | Female | 10-14 years | 95+ years   | 1         | Malaria Lysenko PFPR 1 (Holoendemic)                                         |
| Hemoglobinopathies and hemolytic anemias          | Female | 10-14 years | 95+ years   | 1         | Hemoglobinopathies Prevalence x Excess Mortality                             |
| Hemoglobinopathies and hemolytic anemias          | Female | 10-14 years | 95+ years   | -1        | Health System Access (capped)                                                |
| Hemoglobinopathies and hemolytic anemias          | Female | 10-14 years | 95+ years   | 1         | Hemoglobinopathies Prevalence x Excess Mortality (excluding G6PD deficiency) |
| Hemoglobinopathies and hemolytic anemias          | Female | 10-14 years | 95+ years   | -1        | Socio-demographic Index                                                      |
| Hemoglobinopathies and hemolytic anemias          | Female | 10-14 years | 95+ years   | -1        | Healthcare access and quality index                                          |
| Endocrine, metabolic, blood, and immune disorders | Female | 0-6 days    | 95+ years   | 1         | Alcohol (liters per capita)                                                  |
| Endocrine, metabolic, blood, and immune disorders | Female | 0-6 days    | 95+ years   | 1         | Animal Fats (kcal per capita)                                                |
| Endocrine, metabolic, blood, and immune disorders | Female | 0-6 days    | 95+ years   | -1        | Education (years per capita)                                                 |
| Endocrine, metabolic, blood, and immune disorders | Female | 0-6 days    | 95+ years   | -1        | LDI (IS per capita)                                                          |
| Endocrine, metabolic, blood, and immune disorders | Female | 0-6 days    | 95+ years   | 1         | Mean BMI                                                                     |
| Endocrine, metabolic, blood, and immune disorders | Female | 0-6 days    | 95+ years   | 1         | Cholesterol (total, mean per capita)                                         |
| Endocrine, metabolic, blood, and immune disorders | Female | 0-6 days    | 95+ years   | 1         | Total Calories (kcal per capita)                                             |
| Endocrine, metabolic, blood, and immune disorders | Female | 0-6 days    | 95+ years   | 0         | Socio-demographic Index                                                      |
| Endocrine, metabolic, blood, and immune disorders | Female | 0-6 days    | 95+ years   | -1        | Healthcare access and quality index                                          |
| Endocrine, metabolic, blood, and immune disorders | Male   | 0-6 days    | 95+ years   | 1         | Alcohol (liters per capita)                                                  |
| Endocrine, metabolic, blood, and immune disorders | Male   | 0-6 days    | 95+ years   | 1         | Animal Fats (kcal per capita)                                                |
| Endocrine, metabolic, blood, and immune disorders | Male   | 0-6 days    | 95+ years   | -1        | Education (years per capita)                                                 |
| Endocrine, metabolic, blood, and immune disorders | Male   | 0-6 days    | 95+ years   | -1        | LDI (IS per capita)                                                          |
| Endocrine, metabolic, blood, and immune disorders | Male   | 0-6 days    | 95+ years   | 1         | Mean BMI                                                                     |
| Endocrine, metabolic, blood, and immune disorders | Male   | 0-6 days    | 95+ years   | 1         | Cholesterol (total, mean per capita)                                         |
| Endocrine, metabolic, blood, and immune disorders | Male   | 0-6 days    | 95+ years   | 1         | Total Calories (kcal per capita)                                             |
| Endocrine, metabolic, blood, and immune disorders | Male   | 0-6 days    | 95+ years   | 0         | Socio-demographic Index                                                      |
| Endocrine, metabolic, blood, and immune disorders | Male   | 0-6 days    | 95+ years   | -1        | Healthcare access and quality index                                          |
| Musculoskeletal disorders                         | Male   | 5-9 years   | 95+ years   | 1         | Alcohol (liters per capita)                                                  |
| Musculoskeletal disorders                         | Male   | 5-9 years   | 95+ years   | 1         | Cumulative Cigarettes (10 Years)                                             |
| Musculoskeletal disorders                         | Male   | 5-9 years   | 95+ years   | 1         | Cumulative Cigarettes (5 Years)                                              |
| Musculoskeletal disorders                         | Male   | 5-9 years   | 95+ years   | 0         | Education (years per capita)                                                 |
| Musculoskeletal disorders                         | Male   | 5-9 years   | 95+ years   | 0         | LDI (IS per capita)                                                          |

| Cause                           | Sex    | Age start | Age end     | Direction | Covariate                                                  |
|---------------------------------|--------|-----------|-------------|-----------|------------------------------------------------------------|
| Musculoskeletal disorders       | Male   | 5-9 years | 95+ years   | 1         | Mean BMI                                                   |
| Musculoskeletal disorders       | Male   | 5-9 years | 95+ years   | 1         | Cholesterol (total, mean per capita)                       |
| Musculoskeletal disorders       | Male   | 5-9 years | 95+ years   | 1         | Smoking Prevalence                                         |
| Musculoskeletal disorders       | Male   | 5-9 years | 95+ years   | 0         | Socio-demographic Index                                    |
| Musculoskeletal disorders       | Male   | 5-9 years | 95+ years   | 0         | vegetables adjusted(g)                                     |
| Musculoskeletal disorders       | Male   | 5-9 years | 95+ years   | -1        | Healthcare access and quality index                        |
| Musculoskeletal disorders       | Female | 5-9 years | 95+ years   | 1         | Alcohol (liters per capita)                                |
| Musculoskeletal disorders       | Female | 5-9 years | 95+ years   | 1         | Cumulative Cigarettes (10 Years)                           |
| Musculoskeletal disorders       | Female | 5-9 years | 95+ years   | 1         | Cumulative Cigarettes (5 Years)                            |
| Musculoskeletal disorders       | Female | 5-9 years | 95+ years   | 0         | Education (years per capita)                               |
| Musculoskeletal disorders       | Female | 5-9 years | 95+ years   | 0         | LDI (I\$ per capita)                                       |
| Musculoskeletal disorders       | Female | 5-9 years | 95+ years   | 1         | Mean BMI                                                   |
| Musculoskeletal disorders       | Female | 5-9 years | 95+ years   | 1         | Cholesterol (total, mean per capita)                       |
| Musculoskeletal disorders       | Female | 5-9 years | 95+ years   | 1         | Smoking Prevalence                                         |
| Musculoskeletal disorders       | Female | 5-9 years | 95+ years   | 0         | Socio-demographic Index                                    |
| Musculoskeletal disorders       | Female | 5-9 years | 95+ years   | 0         | vegetables adjusted(g)                                     |
| Musculoskeletal disorders       | Female | 5-9 years | 95+ years   | -1        | Healthcare access and quality index                        |
| Rheumatoid arthritis            | Female | 5-9 years | 95+ years   | 1         | Alcohol (liters per capita)                                |
| Rheumatoid arthritis            | Female | 5-9 years | 95+ years   | 1         | Cumulative Cigarettes (10 Years)                           |
| Rheumatoid arthritis            | Female | 5-9 years | 95+ years   | 1         | Cumulative Cigarettes (5 Years)                            |
| Rheumatoid arthritis            | Female | 5-9 years | 95+ years   | -1        | Education (years per capita)                               |
| Rheumatoid arthritis            | Female | 5-9 years | 95+ years   | -1        | LDI (I\$ per capita)                                       |
| Rheumatoid arthritis            | Female | 5-9 years | 95+ years   | 1         | Mean BMI                                                   |
| Rheumatoid arthritis            | Female | 5-9 years | 95+ years   | 1         | Cholesterol (total, mean per capita)                       |
| Rheumatoid arthritis            | Female | 5-9 years | 95+ years   | 1         | Smoking Prevalence                                         |
| Rheumatoid arthritis            | Female | 5-9 years | 95+ years   | 0         | Socio-demographic Index                                    |
| Rheumatoid arthritis            | Female | 5-9 years | 95+ years   | 0         | vegetables adjusted(g)                                     |
| Rheumatoid arthritis            | Female | 5-9 years | 95+ years   | -1        | Healthcare access and quality index                        |
| Rheumatoid arthritis            | Male   | 5-9 years | 95+ years   | 1         | Alcohol (liters per capita)                                |
| Rheumatoid arthritis            | Male   | 5-9 years | 95+ years   | 1         | Cumulative Cigarettes (10 Years)                           |
| Rheumatoid arthritis            | Male   | 5-9 years | 95+ years   | 1         | Cumulative Cigarettes (5 Years)                            |
| Rheumatoid arthritis            | Male   | 5-9 years | 95+ years   | -1        | Education (years per capita)                               |
| Rheumatoid arthritis            | Male   | 5-9 years | 95+ years   | -1        | LDI (I\$ per capita)                                       |
| Rheumatoid arthritis            | Male   | 5-9 years | 95+ years   | 1         | Mean BMI                                                   |
| Rheumatoid arthritis            | Male   | 5-9 years | 95+ years   | 1         | Cholesterol (total, mean per capita)                       |
| Rheumatoid arthritis            | Male   | 5-9 years | 95+ years   | 1         | Smoking Prevalence                                         |
| Rheumatoid arthritis            | Male   | 5-9 years | 95+ years   | 0         | Socio-demographic Index                                    |
| Rheumatoid arthritis            | Male   | 5-9 years | 95+ years   | 0         | vegetables adjusted(g)                                     |
| Rheumatoid arthritis            | Male   | 5-9 years | 95+ years   | -1        | Healthcare access and quality index                        |
| Other musculoskeletal disorders | Male   | 5-9 years | 95+ years   | 1         | Alcohol (liters per capita)                                |
| Other musculoskeletal disorders | Male   | 5-9 years | 95+ years   | 1         | Cumulative Cigarettes (10 Years)                           |
| Other musculoskeletal disorders | Male   | 5-9 years | 95+ years   | 1         | Cumulative Cigarettes (5 Years)                            |
| Other musculoskeletal disorders | Male   | 5-9 years | 95+ years   | 0         | Education (years per capita)                               |
| Other musculoskeletal disorders | Male   | 5-9 years | 95+ years   | 0         | LDI (I\$ per capita)                                       |
| Other musculoskeletal disorders | Male   | 5-9 years | 95+ years   | 1         | Mean BMI                                                   |
| Other musculoskeletal disorders | Male   | 5-9 years | 95+ years   | 1         | Cholesterol (total, mean per capita)                       |
| Other musculoskeletal disorders | Male   | 5-9 years | 95+ years   | 1         | Smoking Prevalence                                         |
| Other musculoskeletal disorders | Male   | 5-9 years | 95+ years   | 0         | Socio-demographic Index                                    |
| Other musculoskeletal disorders | Male   | 5-9 years | 95+ years   | 0         | vegetables adjusted(g)                                     |
| Other musculoskeletal disorders | Male   | 5-9 years | 95+ years   | -1        | Healthcare access and quality index                        |
| Other musculoskeletal disorders | Female | 5-9 years | 95+ years   | 1         | Alcohol (liters per capita)                                |
| Other musculoskeletal disorders | Female | 5-9 years | 95+ years   | 1         | Cumulative Cigarettes (10 Years)                           |
| Other musculoskeletal disorders | Female | 5-9 years | 95+ years   | 1         | Cumulative Cigarettes (5 Years)                            |
| Other musculoskeletal disorders | Female | 5-9 years | 95+ years   | 0         | Education (years per capita)                               |
| Other musculoskeletal disorders | Female | 5-9 years | 95+ years   | 0         | LDI (I\$ per capita)                                       |
| Other musculoskeletal disorders | Female | 5-9 years | 95+ years   | 1         | Mean BMI                                                   |
| Other musculoskeletal disorders | Female | 5-9 years | 95+ years   | 1         | Cholesterol (total, mean per capita)                       |
| Other musculoskeletal disorders | Female | 5-9 years | 95+ years   | 1         | Smoking Prevalence                                         |
| Other musculoskeletal disorders | Female | 5-9 years | 95+ years   | 0         | Socio-demographic Index                                    |
| Other musculoskeletal disorders | Female | 5-9 years | 95+ years   | 0         | vegetables adjusted(g)                                     |
| Other musculoskeletal disorders | Female | 5-9 years | 95+ years   | -1        | Healthcare access and quality index                        |
| Congenital birth defects        | Male   | 0-6 days  | 65-69 years | -1        | Legality of Abortion                                       |
| Congenital birth defects        | Male   | 0-6 days  | 65-69 years | 1         | Alcohol (liters per capita)                                |
| Congenital birth defects        | Male   | 0-6 days  | 65-69 years | 0         | Antenatal Care (1 visit) Coverage (proportion)             |
| Congenital birth defects        | Male   | 0-6 days  | 65-69 years | -1        | Antenatal Care (4 visits) Coverage (proportion)            |
| Congenital birth defects        | Male   | 0-6 days  | 65-69 years | -1        | Education (years per capita)                               |
| Congenital birth defects        | Male   | 0-6 days  | 65-69 years | -1        | In-Facility Delivery (proportion)                          |
| Congenital birth defects        | Male   | 0-6 days  | 65-69 years | 1         | Live Births (proportion)                                   |
| Congenital birth defects        | Male   | 0-6 days  | 65-69 years | 1         | Indoor Air Pollution (All Cooking Fuels)                   |
| Congenital birth defects        | Male   | 0-6 days  | 65-69 years | 1         | Outdoor Air Pollution (PM2.5)                              |
| Congenital birth defects        | Male   | 0-6 days  | 65-69 years | 1         | Smoking Prevalence (Reproductive Age Standardized)         |
| Congenital birth defects        | Male   | 0-6 days  | 65-69 years | -1        | Socio-demographic Index                                    |
| Congenital birth defects        | Male   | 0-6 days  | 65-69 years | 1         | fruits unadjusted(g)                                       |
| Congenital birth defects        | Male   | 0-6 days  | 65-69 years | 1         | vegetables unadjusted(g)                                   |
| Congenital birth defects        | Male   | 0-6 days  | 65-69 years | 1         | Maternal alcohol consumption during pregnancy (proportion) |
| Congenital birth defects        | Male   | 0-6 days  | 65-69 years | -1        | Healthcare access and quality index                        |
| Congenital birth defects        | Male   | 0-6 days  | 65-69 years | -1        | Folic acid unadjusted (ug)                                 |
| Congenital birth defects        | Female | 0-6 days  | 65-69 years | -1        | Legality of Abortion                                       |
| Congenital birth defects        | Female | 0-6 days  | 65-69 years | 1         | Alcohol (liters per capita)                                |
| Congenital birth defects        | Female | 0-6 days  | 65-69 years | 0         | Antenatal Care (1 visit) Coverage (proportion)             |
| Congenital birth defects        | Female | 0-6 days  | 65-69 years | -1        | Antenatal Care (4 visits) Coverage (proportion)            |
| Congenital birth defects        | Female | 0-6 days  | 65-69 years | -1        | Education (years per capita)                               |
| Congenital birth defects        | Female | 0-6 days  | 65-69 years | -1        | In-Facility Delivery (proportion)                          |
| Congenital birth defects        | Female | 0-6 days  | 65-69 years | 1         | Live Births 35+ (proportion)                               |
| Congenital birth defects        | Female | 0-6 days  | 65-69 years | 1         | Indoor Air Pollution (All Cooking Fuels)                   |
| Congenital birth defects        | Female | 0-6 days  | 65-69 years | 1         | Outdoor Air Pollution (PM2.5)                              |
| Congenital birth defects        | Female | 0-6 days  | 65-69 years | 1         | Smoking Prevalence (Reproductive Age Standardized)         |
| Congenital birth defects        | Female | 0-6 days  | 65-69 years | -1        | Socio-demographic Index                                    |
| Congenital birth defects        | Female | 0-6 days  | 65-69 years | 1         | fruits unadjusted(g)                                       |
| Congenital birth defects        | Female | 0-6 days  | 65-69 years | 1         | vegetables unadjusted(g)                                   |
| Congenital birth defects        | Female | 0-6 days  | 65-69 years | 1         | Maternal alcohol consumption during pregnancy (proportion) |
| Congenital birth defects        | Female | 0-6 days  | 65-69 years | -1        | Healthcare access and quality index                        |



| Cause                      | Sex    | Age start | Age end     | Direction | Covariate                                                  |
|----------------------------|--------|-----------|-------------|-----------|------------------------------------------------------------|
| Congenital birth defects   | Female | 0-6 days  | 65-69 years | -1        | Folic acid unadjusted (ug)                                 |
| Neural tube defects        | Male   | 0-6 days  | 65-69 years | -1        | Legality of Abortion                                       |
| Neural tube defects        | Male   | 0-6 days  | 65-69 years | -1        | Antenatal Care (1 visit) Coverage (proportion)             |
| Neural tube defects        | Male   | 0-6 days  | 65-69 years | -1        | Antenatal Care (4 visits) Coverage (proportion)            |
| Neural tube defects        | Male   | 0-6 days  | 65-69 years | 1         | Diabetes Age-Standardized Prevalence (proportion)          |
| Neural tube defects        | Male   | 0-6 days  | 65-69 years | -1        | Education (years per capita)                               |
| Neural tube defects        | Male   | 0-6 days  | 65-69 years | -1        | In-Facility Delivery (proportion)                          |
| Neural tube defects        | Male   | 0-6 days  | 65-69 years | 1         | Indoor Air Pollution (All Cooking Fuels)                   |
| Neural tube defects        | Male   | 0-6 days  | 65-69 years | 1         | Outdoor Air Pollution (PM2.5)                              |
| Neural tube defects        | Male   | 0-6 days  | 65-69 years | 1         | Smoking Prevalence (Reproductive Age Standardized)         |
| Neural tube defects        | Male   | 0-6 days  | 65-69 years | -1        | Socio-demographic Index                                    |
| Neural tube defects        | Male   | 0-6 days  | 65-69 years | 0         | fruits unadjusted(g)                                       |
| Neural tube defects        | Male   | 0-6 days  | 65-69 years | -1        | vegetables unadjusted(g)                                   |
| Neural tube defects        | Male   | 0-6 days  | 65-69 years | 1         | Maternal alcohol consumption during pregnancy (proportion) |
| Neural tube defects        | Male   | 0-6 days  | 65-69 years | -1        | Healthcare access and quality index                        |
| Neural tube defects        | Male   | 0-6 days  | 65-69 years | -1        | Folic acid unadjusted (ug)                                 |
| Neural tube defects        | Female | 0-6 days  | 65-69 years | -1        | Legality of Abortion                                       |
| Neural tube defects        | Female | 0-6 days  | 65-69 years | -1        | Antenatal Care (1 visit) Coverage (proportion)             |
| Neural tube defects        | Female | 0-6 days  | 65-69 years | -1        | Antenatal Care (4 visits) Coverage (proportion)            |
| Neural tube defects        | Female | 0-6 days  | 65-69 years | 1         | Diabetes Age-Standardized Prevalence (proportion)          |
| Neural tube defects        | Female | 0-6 days  | 65-69 years | -1        | Education (years per capita)                               |
| Neural tube defects        | Female | 0-6 days  | 65-69 years | -1        | In-Facility Delivery (proportion)                          |
| Neural tube defects        | Female | 0-6 days  | 65-69 years | 1         | Indoor Air Pollution (All Cooking Fuels)                   |
| Neural tube defects        | Female | 0-6 days  | 65-69 years | 1         | Outdoor Air Pollution (PM2.5)                              |
| Neural tube defects        | Female | 0-6 days  | 65-69 years | 1         | Smoking Prevalence (Reproductive Age Standardized)         |
| Neural tube defects        | Female | 0-6 days  | 65-69 years | -1        | Socio-demographic Index                                    |
| Neural tube defects        | Female | 0-6 days  | 65-69 years | 0         | fruits unadjusted(g)                                       |
| Neural tube defects        | Female | 0-6 days  | 65-69 years | -1        | vegetables unadjusted(g)                                   |
| Neural tube defects        | Female | 0-6 days  | 65-69 years | 1         | Maternal alcohol consumption during pregnancy (proportion) |
| Neural tube defects        | Female | 0-6 days  | 65-69 years | -1        | Healthcare access and quality index                        |
| Neural tube defects        | Female | 0-6 days  | 65-69 years | -1        | Folic acid unadjusted (ug)                                 |
| Congenital heart anomalies | Male   | 0-6 days  | 65-69 years | -1        | Legality of Abortion                                       |
| Congenital heart anomalies | Male   | 0-6 days  | 65-69 years | 1         | Alcohol (liters per capita)                                |
| Congenital heart anomalies | Male   | 0-6 days  | 65-69 years | -1        | Antenatal Care (1 visit) Coverage (proportion)             |
| Congenital heart anomalies | Male   | 0-6 days  | 65-69 years | -1        | Antenatal Care (4 visits) Coverage (proportion)            |
| Congenital heart anomalies | Male   | 0-6 days  | 65-69 years | 1         | Diabetes Age-Standardized Prevalence (proportion)          |
| Congenital heart anomalies | Male   | 0-6 days  | 65-69 years | -1        | Education (years per capita)                               |
| Congenital heart anomalies | Male   | 0-6 days  | 65-69 years | -1        | In-Facility Delivery (proportion)                          |
| Congenital heart anomalies | Male   | 0-6 days  | 65-69 years | 1         | Live Births 35+ (proportion)                               |
| Congenital heart anomalies | Male   | 0-6 days  | 65-69 years | -1        | Skilled Birth Attendance (proportion)                      |
| Congenital heart anomalies | Male   | 0-6 days  | 65-69 years | 1         | Smoking Prevalence (Reproductive Age Standardized)         |
| Congenital heart anomalies | Male   | 0-6 days  | 65-69 years | -1        | Socio-demographic Index                                    |
| Congenital heart anomalies | Male   | 0-6 days  | 65-69 years | 1         | Maternal alcohol consumption during pregnancy (proportion) |
| Congenital heart anomalies | Male   | 0-6 days  | 65-69 years | -1        | Healthcare access and quality index                        |
| Congenital heart anomalies | Female | 0-6 days  | 65-69 years | -1        | Legality of Abortion                                       |
| Congenital heart anomalies | Female | 0-6 days  | 65-69 years | 1         | Alcohol (liters per capita)                                |
| Congenital heart anomalies | Female | 0-6 days  | 65-69 years | -1        | Antenatal Care (1 visit) Coverage (proportion)             |
| Congenital heart anomalies | Female | 0-6 days  | 65-69 years | -1        | Antenatal Care (4 visits) Coverage (proportion)            |
| Congenital heart anomalies | Female | 0-6 days  | 65-69 years | 1         | Diabetes Age-Standardized Prevalence (proportion)          |
| Congenital heart anomalies | Female | 0-6 days  | 65-69 years | -1        | Education (years per capita)                               |
| Congenital heart anomalies | Female | 0-6 days  | 65-69 years | -1        | In-Facility Delivery (proportion)                          |
| Congenital heart anomalies | Female | 0-6 days  | 65-69 years | 1         | Live Births 35+ (proportion)                               |
| Congenital heart anomalies | Female | 0-6 days  | 65-69 years | -1        | Skilled Birth Attendance (proportion)                      |
| Congenital heart anomalies | Female | 0-6 days  | 65-69 years | 1         | Smoking Prevalence (Reproductive Age Standardized)         |
| Congenital heart anomalies | Female | 0-6 days  | 65-69 years | -1        | Socio-demographic Index                                    |
| Congenital heart anomalies | Female | 0-6 days  | 65-69 years | 1         | Maternal alcohol consumption during pregnancy (proportion) |
| Congenital heart anomalies | Female | 0-6 days  | 65-69 years | -1        | Healthcare access and quality index                        |
| Orofacial clefts           | Male   | 0-6 days  | 1-4 years   | -1        | Legality of Abortion                                       |
| Orofacial clefts           | Male   | 0-6 days  | 1-4 years   | 1         | Alcohol (liters per capita)                                |
| Orofacial clefts           | Male   | 0-6 days  | 1-4 years   | -1        | Antenatal Care (1 visit) Coverage (proportion)             |
| Orofacial clefts           | Male   | 0-6 days  | 1-4 years   | -1        | Antenatal Care (4 visits) Coverage (proportion)            |
| Orofacial clefts           | Male   | 0-6 days  | 1-4 years   | 1         | Diabetes Age-Standardized Prevalence (proportion)          |
| Orofacial clefts           | Male   | 0-6 days  | 1-4 years   | -1        | Education (years per capita)                               |
| Orofacial clefts           | Male   | 0-6 days  | 1-4 years   | 1         | Indoor Air Pollution (All Cooking Fuels)                   |
| Orofacial clefts           | Male   | 0-6 days  | 1-4 years   | 1         | Outdoor Air Pollution (PM2.5)                              |
| Orofacial clefts           | Male   | 0-6 days  | 1-4 years   | -1        | Skilled Birth Attendance (proportion)                      |
| Orofacial clefts           | Male   | 0-6 days  | 1-4 years   | 1         | Smoking Prevalence (Reproductive Age Standardized)         |
| Orofacial clefts           | Male   | 0-6 days  | 1-4 years   | -1        | Socio-demographic Index                                    |
| Orofacial clefts           | Male   | 0-6 days  | 1-4 years   | 0         | fruits unadjusted(g)                                       |
| Orofacial clefts           | Male   | 0-6 days  | 1-4 years   | 0         | vegetables unadjusted(g)                                   |
| Orofacial clefts           | Male   | 0-6 days  | 1-4 years   | 1         | Maternal alcohol consumption during pregnancy (proportion) |
| Orofacial clefts           | Male   | 0-6 days  | 1-4 years   | -1        | Healthcare access and quality index                        |
| Orofacial clefts           | Male   | 0-6 days  | 1-4 years   | -1        | Folic acid unadjusted (ug)                                 |
| Orofacial clefts           | Female | 0-6 days  | 1-4 years   | -1        | Legality of Abortion                                       |
| Orofacial clefts           | Female | 0-6 days  | 1-4 years   | 1         | Alcohol (liters per capita)                                |
| Orofacial clefts           | Female | 0-6 days  | 1-4 years   | -1        | Antenatal Care (1 visit) Coverage (proportion)             |
| Orofacial clefts           | Female | 0-6 days  | 1-4 years   | -1        | Antenatal Care (4 visits) Coverage (proportion)            |
| Orofacial clefts           | Female | 0-6 days  | 1-4 years   | 1         | Diabetes Age-Standardized Prevalence (proportion)          |
| Orofacial clefts           | Female | 0-6 days  | 1-4 years   | -1        | Education (years per capita)                               |
| Orofacial clefts           | Female | 0-6 days  | 1-4 years   | 1         | Indoor Air Pollution (All Cooking Fuels)                   |
| Orofacial clefts           | Female | 0-6 days  | 1-4 years   | 1         | Outdoor Air Pollution (PM2.5)                              |
| Orofacial clefts           | Female | 0-6 days  | 1-4 years   | -1        | Skilled Birth Attendance (proportion)                      |
| Orofacial clefts           | Female | 0-6 days  | 1-4 years   | 1         | Smoking Prevalence (Reproductive Age Standardized)         |
| Orofacial clefts           | Female | 0-6 days  | 1-4 years   | -1        | Socio-demographic Index                                    |
| Orofacial clefts           | Female | 0-6 days  | 1-4 years   | 0         | fruits unadjusted(g)                                       |
| Orofacial clefts           | Female | 0-6 days  | 1-4 years   | 0         | vegetables unadjusted(g)                                   |
| Orofacial clefts           | Female | 0-6 days  | 1-4 years   | 1         | Maternal alcohol consumption during pregnancy (proportion) |
| Orofacial clefts           | Female | 0-6 days  | 1-4 years   | -1        | Healthcare access and quality index                        |
| Down syndrome              | Male   | 0-6 days  | 65-69 years | -1        | Legality of Abortion                                       |
| Down syndrome              | Male   | 0-6 days  | 65-69 years | -1        | Antenatal Care (1 visit) Coverage (proportion)             |
| Down syndrome              | Male   | 0-6 days  | 65-69 years | -1        | Antenatal Care (4 visits) Coverage (proportion)            |
| Down syndrome              | Male   | 0-6 days  | 65-69 years | -1        | Education (years per capita)                               |

| Cause                                         | Sex    | Age start | Age end     | Direction | Covariate                                                  |
|-----------------------------------------------|--------|-----------|-------------|-----------|------------------------------------------------------------|
| Down syndrome                                 | Male   | 0-6 days  | 65-69 years | -1        | In-Facility Delivery (proportion)                          |
| Down syndrome                                 | Male   | 0-6 days  | 65-69 years | -1        | LDI (IS per capita)                                        |
| Down syndrome                                 | Male   | 0-6 days  | 65-69 years | 1         | Live Births 35+ (proportion)                               |
| Down syndrome                                 | Male   | 0-6 days  | 65-69 years | 1         | Live Births 40+ (proportion)                               |
| Down syndrome                                 | Male   | 0-6 days  | 65-69 years | 1         | Indoor Air Pollution (All Cooking Fuels)                   |
| Down syndrome                                 | Male   | 0-6 days  | 65-69 years | 1         | Smoking Prevalence (Reproductive Age Standardized)         |
| Down syndrome                                 | Male   | 0-6 days  | 65-69 years | -1        | Socio-demographic Index                                    |
| Down syndrome                                 | Male   | 0-6 days  | 65-69 years | -1        | vegetables unadjusted(g)                                   |
| Down syndrome                                 | Male   | 0-6 days  | 65-69 years | 1         | Maternal alcohol consumption during pregnancy (proportion) |
| Down syndrome                                 | Male   | 0-6 days  | 65-69 years | -1        | Healthcare access and quality index                        |
| Down syndrome                                 | Female | 0-6 days  | 65-69 years | -1        | Legality of Abortion                                       |
| Down syndrome                                 | Female | 0-6 days  | 65-69 years | -1        | Antenatal Care (1 visit) Coverage (proportion)             |
| Down syndrome                                 | Female | 0-6 days  | 65-69 years | -1        | Antenatal Care (4 visits) Coverage (proportion)            |
| Down syndrome                                 | Female | 0-6 days  | 65-69 years | -1        | Education (years per capita)                               |
| Down syndrome                                 | Female | 0-6 days  | 65-69 years | -1        | In-Facility Delivery (proportion)                          |
| Down syndrome                                 | Female | 0-6 days  | 65-69 years | -1        | LDI (IS per capita)                                        |
| Down syndrome                                 | Female | 0-6 days  | 65-69 years | 1         | Live Births 35+ (proportion)                               |
| Down syndrome                                 | Female | 0-6 days  | 65-69 years | 1         | Live Births 40+ (proportion)                               |
| Down syndrome                                 | Female | 0-6 days  | 65-69 years | 1         | Indoor Air Pollution (All Cooking Fuels)                   |
| Down syndrome                                 | Female | 0-6 days  | 65-69 years | 1         | Smoking Prevalence (Reproductive Age Standardized)         |
| Down syndrome                                 | Female | 0-6 days  | 65-69 years | -1        | Socio-demographic Index                                    |
| Down syndrome                                 | Female | 0-6 days  | 65-69 years | -1        | vegetables unadjusted(g)                                   |
| Down syndrome                                 | Female | 0-6 days  | 65-69 years | 1         | Maternal alcohol consumption during pregnancy (proportion) |
| Down syndrome                                 | Female | 0-6 days  | 65-69 years | -1        | Healthcare access and quality index                        |
| Other chromosomal abnormalities               | Male   | 0-6 days  | 65-69 years | -1        | Legality of Abortion                                       |
| Other chromosomal abnormalities               | Male   | 0-6 days  | 65-69 years | 1         | Alcohol (liters per capita)                                |
| Other chromosomal abnormalities               | Male   | 0-6 days  | 65-69 years | -1        | Antenatal Care (1 visit) Coverage (proportion)             |
| Other chromosomal abnormalities               | Male   | 0-6 days  | 65-69 years | -1        | Antenatal Care (4 visits) Coverage (proportion)            |
| Other chromosomal abnormalities               | Male   | 0-6 days  | 65-69 years | -1        | Education (years per capita)                               |
| Other chromosomal abnormalities               | Male   | 0-6 days  | 65-69 years | -1        | In-Facility Delivery (proportion)                          |
| Other chromosomal abnormalities               | Male   | 0-6 days  | 65-69 years | -1        | LDI (IS per capita)                                        |
| Other chromosomal abnormalities               | Male   | 0-6 days  | 65-69 years | 1         | Live Births 35+ (proportion)                               |
| Other chromosomal abnormalities               | Male   | 0-6 days  | 65-69 years | 1         | Live Births 40+ (proportion)                               |
| Other chromosomal abnormalities               | Male   | 0-6 days  | 65-69 years | 1         | Indoor Air Pollution (All Cooking Fuels)                   |
| Other chromosomal abnormalities               | Male   | 0-6 days  | 65-69 years | -1        | Skilled Birth Attendance (proportion)                      |
| Other chromosomal abnormalities               | Male   | 0-6 days  | 65-69 years | 1         | Smoking Prevalence (Reproductive Age Standardized)         |
| Other chromosomal abnormalities               | Male   | 0-6 days  | 65-69 years | 0         | Socio-demographic Index                                    |
| Other chromosomal abnormalities               | Male   | 0-6 days  | 65-69 years | 1         | Maternal alcohol consumption during pregnancy (proportion) |
| Other chromosomal abnormalities               | Male   | 0-6 days  | 65-69 years | -1        | Healthcare access and quality index                        |
| Other chromosomal abnormalities               | Female | 0-6 days  | 65-69 years | -1        | Legality of Abortion                                       |
| Other chromosomal abnormalities               | Female | 0-6 days  | 65-69 years | 1         | Alcohol (liters per capita)                                |
| Other chromosomal abnormalities               | Female | 0-6 days  | 65-69 years | -1        | Antenatal Care (1 visit) Coverage (proportion)             |
| Other chromosomal abnormalities               | Female | 0-6 days  | 65-69 years | -1        | Antenatal Care (4 visits) Coverage (proportion)            |
| Other chromosomal abnormalities               | Female | 0-6 days  | 65-69 years | -1        | Education (years per capita)                               |
| Other chromosomal abnormalities               | Female | 0-6 days  | 65-69 years | -1        | In-Facility Delivery (proportion)                          |
| Other chromosomal abnormalities               | Female | 0-6 days  | 65-69 years | -1        | LDI (IS per capita)                                        |
| Other chromosomal abnormalities               | Female | 0-6 days  | 65-69 years | 1         | Live Births 35+ (proportion)                               |
| Other chromosomal abnormalities               | Female | 0-6 days  | 65-69 years | 1         | Live Births 40+ (proportion)                               |
| Other chromosomal abnormalities               | Female | 0-6 days  | 65-69 years | 1         | Indoor Air Pollution (All Cooking Fuels)                   |
| Other chromosomal abnormalities               | Female | 0-6 days  | 65-69 years | -1        | Skilled Birth Attendance (proportion)                      |
| Other chromosomal abnormalities               | Female | 0-6 days  | 65-69 years | 1         | Smoking Prevalence (Reproductive Age Standardized)         |
| Other chromosomal abnormalities               | Female | 0-6 days  | 65-69 years | 0         | Socio-demographic Index                                    |
| Other chromosomal abnormalities               | Female | 0-6 days  | 65-69 years | 1         | Maternal alcohol consumption during pregnancy (proportion) |
| Other chromosomal abnormalities               | Female | 0-6 days  | 65-69 years | -1        | Healthcare access and quality index                        |
| Congenital musculoskeletal and limb anomalies | Male   | 0-6 days  | 65-69 years | -1        | Legality of Abortion                                       |
| Congenital musculoskeletal and limb anomalies | Male   | 0-6 days  | 65-69 years | 1         | Alcohol (liters per capita)                                |
| Congenital musculoskeletal and limb anomalies | Male   | 0-6 days  | 65-69 years | -1        | Antenatal Care (1 visit) Coverage (proportion)             |
| Congenital musculoskeletal and limb anomalies | Male   | 0-6 days  | 65-69 years | -1        | Antenatal Care (4 visits) Coverage (proportion)            |
| Congenital musculoskeletal and limb anomalies | Male   | 0-6 days  | 65-69 years | 1         | Diabetes Age-Standardized Prevalence (proportion)          |
| Congenital musculoskeletal and limb anomalies | Male   | 0-6 days  | 65-69 years | -1        | Education (years per capita)                               |
| Congenital musculoskeletal and limb anomalies | Male   | 0-6 days  | 65-69 years | -1        | In-Facility Delivery (proportion)                          |
| Congenital musculoskeletal and limb anomalies | Male   | 0-6 days  | 65-69 years | -1        | LDI (IS per capita)                                        |
| Congenital musculoskeletal and limb anomalies | Male   | 0-6 days  | 65-69 years | 1         | Indoor Air Pollution (All Cooking Fuels)                   |
| Congenital musculoskeletal and limb anomalies | Male   | 0-6 days  | 65-69 years | 1         | Smoking Prevalence (Reproductive Age Standardized)         |
| Congenital musculoskeletal and limb anomalies | Male   | 0-6 days  | 65-69 years | -1        | Socio-demographic Index                                    |
| Congenital musculoskeletal and limb anomalies | Male   | 0-6 days  | 65-69 years | 0         | fruits unadjusted(g)                                       |
| Congenital musculoskeletal and limb anomalies | Male   | 0-6 days  | 65-69 years | 0         | vegetables unadjusted(g)                                   |
| Congenital musculoskeletal and limb anomalies | Male   | 0-6 days  | 65-69 years | 1         | Maternal alcohol consumption during pregnancy (proportion) |
| Congenital musculoskeletal and limb anomalies | Male   | 0-6 days  | 65-69 years | -1        | Healthcare access and quality index                        |
| Congenital musculoskeletal and limb anomalies | Female | 0-6 days  | 65-69 years | -1        | Legality of Abortion                                       |
| Congenital musculoskeletal and limb anomalies | Female | 0-6 days  | 65-69 years | 1         | Alcohol (liters per capita)                                |
| Congenital musculoskeletal and limb anomalies | Female | 0-6 days  | 65-69 years | -1        | Antenatal Care (1 visit) Coverage (proportion)             |
| Congenital musculoskeletal and limb anomalies | Female | 0-6 days  | 65-69 years | -1        | Antenatal Care (4 visits) Coverage (proportion)            |
| Congenital musculoskeletal and limb anomalies | Female | 0-6 days  | 65-69 years | 1         | Diabetes Age-Standardized Prevalence (proportion)          |
| Congenital musculoskeletal and limb anomalies | Female | 0-6 days  | 65-69 years | -1        | Education (years per capita)                               |
| Congenital musculoskeletal and limb anomalies | Female | 0-6 days  | 65-69 years | -1        | In-Facility Delivery (proportion)                          |
| Congenital musculoskeletal and limb anomalies | Female | 0-6 days  | 65-69 years | -1        | LDI (IS per capita)                                        |
| Congenital musculoskeletal and limb anomalies | Female | 0-6 days  | 65-69 years | 1         | Indoor Air Pollution (All Cooking Fuels)                   |
| Congenital musculoskeletal and limb anomalies | Female | 0-6 days  | 65-69 years | 1         | Smoking Prevalence (Reproductive Age Standardized)         |
| Congenital musculoskeletal and limb anomalies | Female | 0-6 days  | 65-69 years | -1        | Socio-demographic Index                                    |
| Congenital musculoskeletal and limb anomalies | Female | 0-6 days  | 65-69 years | 0         | fruits unadjusted(g)                                       |
| Congenital musculoskeletal and limb anomalies | Female | 0-6 days  | 65-69 years | 0         | vegetables unadjusted(g)                                   |
| Congenital musculoskeletal and limb anomalies | Female | 0-6 days  | 65-69 years | 1         | Maternal alcohol consumption during pregnancy (proportion) |
| Congenital musculoskeletal and limb anomalies | Female | 0-6 days  | 65-69 years | -1        | Healthcare access and quality index                        |
| Urogenital congenital anomalies               | Male   | 0-6 days  | 65-69 years | 1         | Alcohol (liters per capita)                                |
| Urogenital congenital anomalies               | Male   | 0-6 days  | 65-69 years | -1        | Antenatal Care (1 visit) Coverage (proportion)             |
| Urogenital congenital anomalies               | Male   | 0-6 days  | 65-69 years | -1        | Antenatal Care (4 visits) Coverage (proportion)            |
| Urogenital congenital anomalies               | Male   | 0-6 days  | 65-69 years | 1         | Diabetes Age-Standardized Prevalence (proportion)          |
| Urogenital congenital anomalies               | Male   | 0-6 days  | 65-69 years | -1        | Education (years per capita)                               |
| Urogenital congenital anomalies               | Male   | 0-6 days  | 65-69 years | -1        | In-Facility Delivery (proportion)                          |
| Urogenital congenital anomalies               | Male   | 0-6 days  | 65-69 years | -1        | LDI (IS per capita)                                        |
| Urogenital congenital anomalies               | Male   | 0-6 days  | 65-69 years | 1         | Indoor Air Pollution (All Cooking Fuels)                   |

| Cause                           | Sex    | Age start   | Age end     | Direction | Covariate                                                  |
|---------------------------------|--------|-------------|-------------|-----------|------------------------------------------------------------|
| Urogenital congenital anomalies | Male   | 0-6 days    | 65-69 years | 1         | Outdoor Air Pollution (PM2.5)                              |
| Urogenital congenital anomalies | Male   | 0-6 days    | 65-69 years | 1         | Smoking Prevalence (Reproductive Age Standardized)         |
| Urogenital congenital anomalies | Male   | 0-6 days    | 65-69 years | -1        | Socio-demographic Index                                    |
| Urogenital congenital anomalies | Male   | 0-6 days    | 65-69 years | 1         | Maternal alcohol consumption during pregnancy (proportion) |
| Urogenital congenital anomalies | Male   | 0-6 days    | 65-69 years | -1        | Healthcare access and quality index                        |
| Urogenital congenital anomalies | Female | 0-6 days    | 65-69 years | 1         | Alcohol (liters per capita)                                |
| Urogenital congenital anomalies | Female | 0-6 days    | 65-69 years | -1        | Antenatal Care (1 visit) Coverage (proportion)             |
| Urogenital congenital anomalies | Female | 0-6 days    | 65-69 years | -1        | Antenatal Care (4 visits) Coverage (proportion)            |
| Urogenital congenital anomalies | Female | 0-6 days    | 65-69 years | 1         | Diabetes Age-Standardized Prevalence (proportion)          |
| Urogenital congenital anomalies | Female | 0-6 days    | 65-69 years | -1        | Education (years per capita)                               |
| Urogenital congenital anomalies | Female | 0-6 days    | 65-69 years | -1        | In-Facility Delivery (proportion)                          |
| Urogenital congenital anomalies | Female | 0-6 days    | 65-69 years | -1        | LDI (IS per capita)                                        |
| Urogenital congenital anomalies | Female | 0-6 days    | 65-69 years | 1         | Indoor Air Pollution (All Cooking Fuels)                   |
| Urogenital congenital anomalies | Female | 0-6 days    | 65-69 years | 1         | Outdoor Air Pollution (PM2.5)                              |
| Urogenital congenital anomalies | Female | 0-6 days    | 65-69 years | 1         | Smoking Prevalence (Reproductive Age Standardized)         |
| Urogenital congenital anomalies | Female | 0-6 days    | 65-69 years | -1        | Socio-demographic Index                                    |
| Urogenital congenital anomalies | Female | 0-6 days    | 65-69 years | 1         | Maternal alcohol consumption during pregnancy (proportion) |
| Urogenital congenital anomalies | Female | 0-6 days    | 65-69 years | -1        | Healthcare access and quality index                        |
| Digestive congenital anomalies  | Female | 0-6 days    | 65-69 years | 1         | Alcohol (liters per capita)                                |
| Digestive congenital anomalies  | Female | 0-6 days    | 65-69 years | -1        | Antenatal Care (1 visit) Coverage (proportion)             |
| Digestive congenital anomalies  | Female | 0-6 days    | 65-69 years | -1        | Antenatal Care (4 visits) Coverage (proportion)            |
| Digestive congenital anomalies  | Female | 0-6 days    | 65-69 years | 1         | Diabetes Age-Standardized Prevalence (proportion)          |
| Digestive congenital anomalies  | Female | 0-6 days    | 65-69 years | -1        | Education (years per capita)                               |
| Digestive congenital anomalies  | Female | 0-6 days    | 65-69 years | -1        | In-Facility Delivery (proportion)                          |
| Digestive congenital anomalies  | Female | 0-6 days    | 65-69 years | -1        | LDI (IS per capita)                                        |
| Digestive congenital anomalies  | Female | 0-6 days    | 65-69 years | 1         | Indoor Air Pollution (All Cooking Fuels)                   |
| Digestive congenital anomalies  | Female | 0-6 days    | 65-69 years | 1         | Smoking Prevalence (Reproductive Age Standardized)         |
| Digestive congenital anomalies  | Female | 0-6 days    | 65-69 years | -1        | Health System Access (capped)                              |
| Digestive congenital anomalies  | Female | 0-6 days    | 65-69 years | 1         | Prevalence of obesity (age-standardized)                   |
| Digestive congenital anomalies  | Female | 0-6 days    | 65-69 years | -1        | Socio-demographic Index                                    |
| Digestive congenital anomalies  | Female | 0-6 days    | 65-69 years | 0         | fruits unadjusted(g)                                       |
| Digestive congenital anomalies  | Female | 0-6 days    | 65-69 years | 0         | vegetables unadjusted(g)                                   |
| Digestive congenital anomalies  | Female | 0-6 days    | 65-69 years | 1         | Maternal alcohol consumption during pregnancy (proportion) |
| Digestive congenital anomalies  | Female | 0-6 days    | 65-69 years | -1        | Healthcare access and quality index                        |
| Digestive congenital anomalies  | Male   | 0-6 days    | 65-69 years | 1         | Alcohol (liters per capita)                                |
| Digestive congenital anomalies  | Male   | 0-6 days    | 65-69 years | -1        | Antenatal Care (1 visit) Coverage (proportion)             |
| Digestive congenital anomalies  | Male   | 0-6 days    | 65-69 years | -1        | Antenatal Care (4 visits) Coverage (proportion)            |
| Digestive congenital anomalies  | Male   | 0-6 days    | 65-69 years | 1         | Diabetes Age-Standardized Prevalence (proportion)          |
| Digestive congenital anomalies  | Male   | 0-6 days    | 65-69 years | -1        | Education (years per capita)                               |
| Digestive congenital anomalies  | Male   | 0-6 days    | 65-69 years | -1        | In-Facility Delivery (proportion)                          |
| Digestive congenital anomalies  | Male   | 0-6 days    | 65-69 years | -1        | LDI (IS per capita)                                        |
| Digestive congenital anomalies  | Male   | 0-6 days    | 65-69 years | 1         | Indoor Air Pollution (All Cooking Fuels)                   |
| Digestive congenital anomalies  | Male   | 0-6 days    | 65-69 years | 1         | Smoking Prevalence (Reproductive Age Standardized)         |
| Digestive congenital anomalies  | Male   | 0-6 days    | 65-69 years | -1        | Health System Access (capped)                              |
| Digestive congenital anomalies  | Male   | 0-6 days    | 65-69 years | 1         | Prevalence of obesity (age-standardized)                   |
| Digestive congenital anomalies  | Male   | 0-6 days    | 65-69 years | -1        | Socio-demographic Index                                    |
| Digestive congenital anomalies  | Male   | 0-6 days    | 65-69 years | 0         | fruits unadjusted(g)                                       |
| Digestive congenital anomalies  | Male   | 0-6 days    | 65-69 years | 0         | vegetables unadjusted(g)                                   |
| Digestive congenital anomalies  | Male   | 0-6 days    | 65-69 years | 1         | Maternal alcohol consumption during pregnancy (proportion) |
| Digestive congenital anomalies  | Male   | 0-6 days    | 65-69 years | -1        | Healthcare access and quality index                        |
| Other congenital birth defects  | Female | 0-6 days    | 65-69 years | -1        | Legality of Abortion                                       |
| Other congenital birth defects  | Female | 0-6 days    | 65-69 years | 1         | Alcohol (liters per capita)                                |
| Other congenital birth defects  | Female | 0-6 days    | 65-69 years | -1        | Antenatal Care (1 visit) Coverage (proportion)             |
| Other congenital birth defects  | Female | 0-6 days    | 65-69 years | -1        | Antenatal Care (4 visits) Coverage (proportion)            |
| Other congenital birth defects  | Female | 0-6 days    | 65-69 years | 1         | Diabetes Age-Standardized Prevalence (proportion)          |
| Other congenital birth defects  | Female | 0-6 days    | 65-69 years | -1        | Education (years per capita)                               |
| Other congenital birth defects  | Female | 0-6 days    | 65-69 years | -1        | In-Facility Delivery (proportion)                          |
| Other congenital birth defects  | Female | 0-6 days    | 65-69 years | -1        | LDI (IS per capita)                                        |
| Other congenital birth defects  | Female | 0-6 days    | 65-69 years | 1         | Live Births 35+ (proportion)                               |
| Other congenital birth defects  | Female | 0-6 days    | 65-69 years | 1         | Indoor Air Pollution (All Cooking Fuels)                   |
| Other congenital birth defects  | Female | 0-6 days    | 65-69 years | 1         | Smoking Prevalence (Reproductive Age Standardized)         |
| Other congenital birth defects  | Female | 0-6 days    | 65-69 years | -1        | Socio-demographic Index                                    |
| Other congenital birth defects  | Female | 0-6 days    | 65-69 years | 1         | Maternal alcohol consumption during pregnancy (proportion) |
| Other congenital birth defects  | Female | 0-6 days    | 65-69 years | -1        | Healthcare access and quality index                        |
| Other congenital birth defects  | Male   | 0-6 days    | 65-69 years | -1        | Legality of Abortion                                       |
| Other congenital birth defects  | Male   | 0-6 days    | 65-69 years | 1         | Alcohol (liters per capita)                                |
| Other congenital birth defects  | Male   | 0-6 days    | 65-69 years | -1        | Antenatal Care (1 visit) Coverage (proportion)             |
| Other congenital birth defects  | Male   | 0-6 days    | 65-69 years | -1        | Antenatal Care (4 visits) Coverage (proportion)            |
| Other congenital birth defects  | Male   | 0-6 days    | 65-69 years | 1         | Diabetes Age-Standardized Prevalence (proportion)          |
| Other congenital birth defects  | Male   | 0-6 days    | 65-69 years | -1        | Education (years per capita)                               |
| Other congenital birth defects  | Male   | 0-6 days    | 65-69 years | -1        | In-Facility Delivery (proportion)                          |
| Other congenital birth defects  | Male   | 0-6 days    | 65-69 years | -1        | LDI (IS per capita)                                        |
| Other congenital birth defects  | Male   | 0-6 days    | 65-69 years | 1         | Live Births 35+ (proportion)                               |
| Other congenital birth defects  | Male   | 0-6 days    | 65-69 years | 1         | Indoor Air Pollution (All Cooking Fuels)                   |
| Other congenital birth defects  | Male   | 0-6 days    | 65-69 years | 1         | Smoking Prevalence (Reproductive Age Standardized)         |
| Other congenital birth defects  | Male   | 0-6 days    | 65-69 years | -1        | Socio-demographic Index                                    |
| Other congenital birth defects  | Male   | 0-6 days    | 65-69 years | 1         | Maternal alcohol consumption during pregnancy (proportion) |
| Other congenital birth defects  | Male   | 0-6 days    | 65-69 years | -1        | Healthcare access and quality index                        |
| Skin and subcutaneous diseases  | Male   | 28-364 days | 95+ years   | 1         | Alcohol (liters per capita)                                |
| Skin and subcutaneous diseases  | Male   | 28-364 days | 95+ years   | 1         | Cumulative Cigarettes (10 Years)                           |
| Skin and subcutaneous diseases  | Male   | 28-364 days | 95+ years   | 1         | Cumulative Cigarettes (5 Years)                            |
| Skin and subcutaneous diseases  | Male   | 28-364 days | 95+ years   | -1        | Education (years per capita)                               |
| Skin and subcutaneous diseases  | Male   | 28-364 days | 95+ years   | -1        | LDI (IS per capita)                                        |
| Skin and subcutaneous diseases  | Male   | 28-364 days | 95+ years   | 1         | Smoking Prevalence                                         |
| Skin and subcutaneous diseases  | Male   | 28-364 days | 95+ years   | -1        | Improved Water Source (proportion with access)             |
| Skin and subcutaneous diseases  | Male   | 28-364 days | 95+ years   | 1         | SEV unsafe sanitation                                      |
| Skin and subcutaneous diseases  | Male   | 28-364 days | 95+ years   | 0         | Socio-demographic Index                                    |
| Skin and subcutaneous diseases  | Male   | 28-364 days | 95+ years   | -1        | Healthcare access and quality index                        |
| Skin and subcutaneous diseases  | Female | 28-364 days | 95+ years   | 1         | Alcohol (liters per capita)                                |
| Skin and subcutaneous diseases  | Female | 28-364 days | 95+ years   | 1         | Cumulative Cigarettes (10 Years)                           |
| Skin and subcutaneous diseases  | Female | 28-364 days | 95+ years   | 1         | Cumulative Cigarettes (5 Years)                            |
| Skin and subcutaneous diseases  | Female | 28-364 days | 95+ years   | -1        | Education (years per capita)                               |

| Cause                                | Sex    | Age start   | Age end     | Direction | Covariate                                              |
|--------------------------------------|--------|-------------|-------------|-----------|--------------------------------------------------------|
| Skin and subcutaneous diseases       | Female | 28-364 days | 95+ years   | -1        | LDI (I\$ per capita)                                   |
| Skin and subcutaneous diseases       | Female | 28-364 days | 95+ years   | 1         | Smoking Prevalence                                     |
| Skin and subcutaneous diseases       | Female | 28-364 days | 95+ years   | -1        | Improved Water Source (proportion with access)         |
| Skin and subcutaneous diseases       | Female | 28-364 days | 95+ years   | 1         | SEV unsafe sanitation                                  |
| Skin and subcutaneous diseases       | Female | 28-364 days | 95+ years   | 0         | Socio-demographic Index                                |
| Skin and subcutaneous diseases       | Female | 28-364 days | 95+ years   | -1        | Healthcare access and quality index                    |
| Cellulitis                           | Male   | 28-364 days | 95+ years   | 0         | Education (years per capita)                           |
| Cellulitis                           | Male   | 28-364 days | 95+ years   | 0         | LDI (I\$ per capita)                                   |
| Cellulitis                           | Male   | 28-364 days | 95+ years   | -1        | Healthcare access and quality index                    |
| Cellulitis                           | Female | 28-364 days | 95+ years   | 0         | Education (years per capita)                           |
| Cellulitis                           | Female | 28-364 days | 95+ years   | 0         | LDI (I\$ per capita)                                   |
| Cellulitis                           | Female | 28-364 days | 95+ years   | -1        | Healthcare access and quality index                    |
| Pyoderma                             | Female | 0-6 days    | 95+ years   | 1         | Alcohol (liters per capita)                            |
| Pyoderma                             | Female | 0-6 days    | 95+ years   | 1         | Cumulative Cigarettes (10 Years)                       |
| Pyoderma                             | Female | 0-6 days    | 95+ years   | 1         | Cumulative Cigarettes (5 Years)                        |
| Pyoderma                             | Female | 0-6 days    | 95+ years   | -1        | Education (years per capita)                           |
| Pyoderma                             | Female | 0-6 days    | 95+ years   | -1        | LDI (I\$ per capita)                                   |
| Pyoderma                             | Female | 0-6 days    | 95+ years   | 1         | Smoking Prevalence                                     |
| Pyoderma                             | Female | 0-6 days    | 95+ years   | -1        | Improved Water Source (proportion with access)         |
| Pyoderma                             | Female | 0-6 days    | 95+ years   | 1         | SEV unsafe sanitation                                  |
| Pyoderma                             | Female | 0-6 days    | 95+ years   | 0         | Socio-demographic Index                                |
| Pyoderma                             | Female | 0-6 days    | 95+ years   | -1        | Healthcare access and quality index                    |
| Pyoderma                             | Male   | 0-6 days    | 95+ years   | 1         | Alcohol (liters per capita)                            |
| Pyoderma                             | Male   | 0-6 days    | 95+ years   | 1         | Cumulative Cigarettes (10 Years)                       |
| Pyoderma                             | Male   | 0-6 days    | 95+ years   | 1         | Cumulative Cigarettes (5 Years)                        |
| Pyoderma                             | Male   | 0-6 days    | 95+ years   | -1        | Education (years per capita)                           |
| Pyoderma                             | Male   | 0-6 days    | 95+ years   | -1        | LDI (I\$ per capita)                                   |
| Pyoderma                             | Male   | 0-6 days    | 95+ years   | 1         | Smoking Prevalence                                     |
| Pyoderma                             | Male   | 0-6 days    | 95+ years   | -1        | Improved Water Source (proportion with access)         |
| Pyoderma                             | Male   | 0-6 days    | 95+ years   | 1         | SEV unsafe sanitation                                  |
| Pyoderma                             | Male   | 0-6 days    | 95+ years   | 0         | Socio-demographic Index                                |
| Pyoderma                             | Male   | 0-6 days    | 95+ years   | -1        | Healthcare access and quality index                    |
| Decubitus ulcer                      | Male   | 1-4 years   | 95+ years   | 1         | Alcohol (liters per capita)                            |
| Decubitus ulcer                      | Male   | 1-4 years   | 95+ years   | 1         | Cumulative Cigarettes (10 Years)                       |
| Decubitus ulcer                      | Male   | 1-4 years   | 95+ years   | 1         | Cumulative Cigarettes (5 Years)                        |
| Decubitus ulcer                      | Male   | 1-4 years   | 95+ years   | 1         | Diabetes Fasting Plasma Glucose (mmol/L)               |
| Decubitus ulcer                      | Male   | 1-4 years   | 95+ years   | -1        | Education (years per capita)                           |
| Decubitus ulcer                      | Male   | 1-4 years   | 95+ years   | -1        | Health System Access 2 (unitless)                      |
| Decubitus ulcer                      | Male   | 1-4 years   | 95+ years   | -1        | LDI (I\$ per capita)                                   |
| Decubitus ulcer                      | Male   | 1-4 years   | 95+ years   | 1         | Smoking Prevalence                                     |
| Decubitus ulcer                      | Male   | 1-4 years   | 95+ years   | -1        | Improved Water Source (proportion with access)         |
| Decubitus ulcer                      | Male   | 1-4 years   | 95+ years   | 1         | Prevalence of obesity                                  |
| Decubitus ulcer                      | Male   | 1-4 years   | 95+ years   | 1         | SEV unsafe sanitation                                  |
| Decubitus ulcer                      | Male   | 1-4 years   | 95+ years   | 0         | Socio-demographic Index                                |
| Decubitus ulcer                      | Male   | 1-4 years   | 95+ years   | -1        | Healthcare access and quality index                    |
| Decubitus ulcer                      | Female | 1-4 years   | 95+ years   | 1         | Alcohol (liters per capita)                            |
| Decubitus ulcer                      | Female | 1-4 years   | 95+ years   | 1         | Cumulative Cigarettes (10 Years)                       |
| Decubitus ulcer                      | Female | 1-4 years   | 95+ years   | 1         | Cumulative Cigarettes (5 Years)                        |
| Decubitus ulcer                      | Female | 1-4 years   | 95+ years   | 1         | Diabetes Fasting Plasma Glucose (mmol/L)               |
| Decubitus ulcer                      | Female | 1-4 years   | 95+ years   | -1        | Education (years per capita)                           |
| Decubitus ulcer                      | Female | 1-4 years   | 95+ years   | -1        | Health System Access 2 (unitless)                      |
| Decubitus ulcer                      | Female | 1-4 years   | 95+ years   | -1        | LDI (I\$ per capita)                                   |
| Decubitus ulcer                      | Female | 1-4 years   | 95+ years   | 1         | Smoking Prevalence                                     |
| Decubitus ulcer                      | Female | 1-4 years   | 95+ years   | -1        | Improved Water Source (proportion with access)         |
| Decubitus ulcer                      | Female | 1-4 years   | 95+ years   | 1         | Prevalence of obesity                                  |
| Decubitus ulcer                      | Female | 1-4 years   | 95+ years   | 1         | SEV unsafe sanitation                                  |
| Decubitus ulcer                      | Female | 1-4 years   | 95+ years   | 0         | Socio-demographic Index                                |
| Decubitus ulcer                      | Female | 1-4 years   | 95+ years   | -1        | Healthcare access and quality index                    |
| Other skin and subcutaneous diseases | Male   | 28-364 days | 95+ years   | 1         | Alcohol (liters per capita)                            |
| Other skin and subcutaneous diseases | Male   | 28-364 days | 95+ years   | 1         | Cumulative Cigarettes (10 Years)                       |
| Other skin and subcutaneous diseases | Male   | 28-364 days | 95+ years   | 1         | Cumulative Cigarettes (5 Years)                        |
| Other skin and subcutaneous diseases | Male   | 28-364 days | 95+ years   | -1        | Education (years per capita)                           |
| Other skin and subcutaneous diseases | Male   | 28-364 days | 95+ years   | -1        | Health System Access 2 (unitless)                      |
| Other skin and subcutaneous diseases | Male   | 28-364 days | 95+ years   | -1        | LDI (I\$ per capita)                                   |
| Other skin and subcutaneous diseases | Male   | 28-364 days | 95+ years   | 1         | Underweight (proportion <2SD weight for age, <5 years) |
| Other skin and subcutaneous diseases | Male   | 28-364 days | 95+ years   | 1         | Smoking Prevalence                                     |
| Other skin and subcutaneous diseases | Male   | 28-364 days | 95+ years   | -1        | Improved Water Source (proportion with access)         |
| Other skin and subcutaneous diseases | Male   | 28-364 days | 95+ years   | 1         | SEV unsafe sanitation                                  |
| Other skin and subcutaneous diseases | Male   | 28-364 days | 95+ years   | 0         | Socio-demographic Index                                |
| Other skin and subcutaneous diseases | Male   | 28-364 days | 95+ years   | -1        | Healthcare access and quality index                    |
| Other skin and subcutaneous diseases | Female | 28-364 days | 95+ years   | 1         | Alcohol (liters per capita)                            |
| Other skin and subcutaneous diseases | Female | 28-364 days | 95+ years   | 1         | Cumulative Cigarettes (10 Years)                       |
| Other skin and subcutaneous diseases | Female | 28-364 days | 95+ years   | 1         | Cumulative Cigarettes (5 Years)                        |
| Other skin and subcutaneous diseases | Female | 28-364 days | 95+ years   | -1        | Education (years per capita)                           |
| Other skin and subcutaneous diseases | Female | 28-364 days | 95+ years   | -1        | Health System Access 2 (unitless)                      |
| Other skin and subcutaneous diseases | Female | 28-364 days | 95+ years   | -1        | LDI (I\$ per capita)                                   |
| Other skin and subcutaneous diseases | Female | 28-364 days | 95+ years   | 1         | Underweight (proportion <2SD weight for age, <5 years) |
| Other skin and subcutaneous diseases | Female | 28-364 days | 95+ years   | 1         | Smoking Prevalence                                     |
| Other skin and subcutaneous diseases | Female | 28-364 days | 95+ years   | -1        | Improved Water Source (proportion with access)         |
| Other skin and subcutaneous diseases | Female | 28-364 days | 95+ years   | 1         | SEV unsafe sanitation                                  |
| Other skin and subcutaneous diseases | Female | 28-364 days | 95+ years   | 0         | Socio-demographic Index                                |
| Other skin and subcutaneous diseases | Female | 28-364 days | 95+ years   | -1        | Healthcare access and quality index                    |
| Sudden infant death syndrome         | Male   | 7-27 days   | 28-364 days | -1        | Education (years per capita)                           |
| Sudden infant death syndrome         | Male   | 7-27 days   | 28-364 days | -1        | In-Facility Delivery (proportion)                      |
| Sudden infant death syndrome         | Male   | 7-27 days   | 28-364 days | 0         | LDI (I\$ per capita)                                   |
| Sudden infant death syndrome         | Male   | 7-27 days   | 28-364 days | 1         | Underweight (proportion <2SD weight for age, <5 years) |
| Sudden infant death syndrome         | Male   | 7-27 days   | 28-364 days | 1         | Indoor Air Pollution (All Cooking Fuels)               |
| Sudden infant death syndrome         | Male   | 7-27 days   | 28-364 days | -1        | Skilled Birth Attendance (proportion)                  |
| Sudden infant death syndrome         | Male   | 7-27 days   | 28-364 days | 1         | Smoking Prevalence (Reproductive Age Standardized)     |
| Sudden infant death syndrome         | Male   | 7-27 days   | 28-364 days | 1         | Total Fertility Rate                                   |
| Sudden infant death syndrome         | Male   | 7-27 days   | 28-364 days | -1        | Health System Access (capped)                          |
| Sudden infant death syndrome         | Male   | 7-27 days   | 28-364 days | 0         | Socio-demographic Index                                |

| Cause                        | Sex    | Age start | Age end     | Direction | Covariate                                              |
|------------------------------|--------|-----------|-------------|-----------|--------------------------------------------------------|
| Sudden infant death syndrome | Male   | 7-27 days | 28-364 days | -1        | Healthcare access and quality index                    |
| Sudden infant death syndrome | Female | 7-27 days | 28-364 days | -1        | Education (years per capita)                           |
| Sudden infant death syndrome | Female | 7-27 days | 28-364 days | -1        | In-Facility Delivery (proportion)                      |
| Sudden infant death syndrome | Female | 7-27 days | 28-364 days | 0         | LDI (\$ per capita)                                    |
| Sudden infant death syndrome | Female | 7-27 days | 28-364 days | 1         | Underweight (proportion <2SD weight for age, <5 years) |
| Sudden infant death syndrome | Female | 7-27 days | 28-364 days | 1         | Indoor Air Pollution (All Cooking Fuels)               |
| Sudden infant death syndrome | Female | 7-27 days | 28-364 days | -1        | Skilled Birth Attendance (proportion)                  |
| Sudden infant death syndrome | Female | 7-27 days | 28-364 days | 1         | Smoking Prevalence (Reproductive Age Standardized)     |
| Sudden infant death syndrome | Female | 7-27 days | 28-364 days | 1         | Total Fertility Rate                                   |
| Sudden infant death syndrome | Female | 7-27 days | 28-364 days | 0         | Socio-demographic Index                                |
| Transport injuries           | Female | 0-6 days  | 95+ years   | 1         | Alcohol (liters per capita)                            |
| Transport injuries           | Female | 0-6 days  | 95+ years   | -1        | Education (years per capita)                           |
| Transport injuries           | Female | 0-6 days  | 95+ years   | 0         | LDI (\$ per capita)                                    |
| Transport injuries           | Female | 0-6 days  | 95+ years   | 0         | Population Density (300-500 ppl/sqkm, proportion)      |
| Transport injuries           | Female | 0-6 days  | 95+ years   | 0         | Population Density (500-1000 ppl/sqkm, proportion)     |
| Transport injuries           | Female | 0-6 days  | 95+ years   | 1         | Rainfall Quintile 5 (proportion)                       |
| Transport injuries           | Female | 0-6 days  | 95+ years   | 1         | Vehicles - 2+4 wheels (per capita)                     |
| Transport injuries           | Female | 0-6 days  | 95+ years   | 1         | Vehicles - 2 wheels fraction (proportion)              |
| Transport injuries           | Female | 0-6 days  | 95+ years   | -1        | Socio-demographic Index                                |
| Transport injuries           | Female | 0-6 days  | 95+ years   | -1        | Healthcare access and quality index                    |
| Transport injuries           | Male   | 0-6 days  | 95+ years   | 1         | Alcohol (liters per capita)                            |
| Transport injuries           | Male   | 0-6 days  | 95+ years   | -1        | Education (years per capita)                           |
| Transport injuries           | Male   | 0-6 days  | 95+ years   | 0         | LDI (\$ per capita)                                    |
| Transport injuries           | Male   | 0-6 days  | 95+ years   | 0         | Population Density (300-500 ppl/sqkm, proportion)      |
| Transport injuries           | Male   | 0-6 days  | 95+ years   | 0         | Population Density (500-1000 ppl/sqkm, proportion)     |
| Transport injuries           | Male   | 0-6 days  | 95+ years   | 1         | Rainfall Quintile 5 (proportion)                       |
| Transport injuries           | Male   | 0-6 days  | 95+ years   | 1         | Vehicles - 2+4 wheels (per capita)                     |
| Transport injuries           | Male   | 0-6 days  | 95+ years   | 1         | Vehicles - 2 wheels fraction (proportion)              |
| Transport injuries           | Male   | 0-6 days  | 95+ years   | -1        | Socio-demographic Index                                |
| Transport injuries           | Male   | 0-6 days  | 95+ years   | -1        | Healthcare access and quality index                    |
| Road injuries                | Male   | 0-6 days  | 95+ years   | 1         | Alcohol (liters per capita)                            |
| Road injuries                | Male   | 0-6 days  | 95+ years   | -1        | Education (years per capita)                           |
| Road injuries                | Male   | 0-6 days  | 95+ years   | 0         | LDI (\$ per capita)                                    |
| Road injuries                | Male   | 0-6 days  | 95+ years   | 1         | Population 15 to 30 (proportion)                       |
| Road injuries                | Male   | 0-6 days  | 95+ years   | 0         | Population Density (300-500 ppl/sqkm, proportion)      |
| Road injuries                | Male   | 0-6 days  | 95+ years   | 0         | Population Density (500-1000 ppl/sqkm, proportion)     |
| Road injuries                | Male   | 0-6 days  | 95+ years   | 1         | Vehicles - 2+4 wheels (per capita)                     |
| Road injuries                | Male   | 0-6 days  | 95+ years   | 1         | Vehicles - 2 wheels (per capita)                       |
| Road injuries                | Male   | 0-6 days  | 95+ years   | 1         | Vehicles - 4 wheels (per capita)                       |
| Road injuries                | Male   | 0-6 days  | 95+ years   | 1         | Vehicles - 2 wheels fraction (proportion)              |
| Road injuries                | Male   | 0-6 days  | 95+ years   | 1         | Log-transformed SEV scalar: Road Inj                   |
| Road injuries                | Male   | 0-6 days  | 95+ years   | -1        | Socio-demographic Index                                |
| Road injuries                | Male   | 0-6 days  | 95+ years   | -1        | Healthcare access and quality index                    |
| Road injuries                | Female | 0-6 days  | 95+ years   | 1         | Alcohol (liters per capita)                            |
| Road injuries                | Female | 0-6 days  | 95+ years   | -1        | Education (years per capita)                           |
| Road injuries                | Female | 0-6 days  | 95+ years   | 0         | LDI (\$ per capita)                                    |
| Road injuries                | Female | 0-6 days  | 95+ years   | 1         | Population 15 to 30 (proportion)                       |
| Road injuries                | Female | 0-6 days  | 95+ years   | 0         | Population Density (300-500 ppl/sqkm, proportion)      |
| Road injuries                | Female | 0-6 days  | 95+ years   | 0         | Population Density (500-1000 ppl/sqkm, proportion)     |
| Road injuries                | Female | 0-6 days  | 95+ years   | 1         | Vehicles - 2+4 wheels (per capita)                     |
| Road injuries                | Female | 0-6 days  | 95+ years   | 1         | Vehicles - 2 wheels (per capita)                       |
| Road injuries                | Female | 0-6 days  | 95+ years   | 1         | Vehicles - 4 wheels (per capita)                       |
| Road injuries                | Female | 0-6 days  | 95+ years   | 1         | Vehicles - 2 wheels fraction (proportion)              |
| Road injuries                | Female | 0-6 days  | 95+ years   | 1         | Log-transformed SEV scalar: Road Inj                   |
| Road injuries                | Female | 0-6 days  | 95+ years   | -1        | Socio-demographic Index                                |
| Road injuries                | Female | 0-6 days  | 95+ years   | -1        | Healthcare access and quality index                    |
| Pedestrian road injuries     | Female | 0-6 days  | 95+ years   | 1         | Alcohol (liters per capita)                            |
| Pedestrian road injuries     | Female | 0-6 days  | 95+ years   | -1        | Education (years per capita)                           |
| Pedestrian road injuries     | Female | 0-6 days  | 95+ years   | 0         | LDI (\$ per capita)                                    |
| Pedestrian road injuries     | Female | 0-6 days  | 95+ years   | 0         | Population Density (300-500 ppl/sqkm, proportion)      |
| Pedestrian road injuries     | Female | 0-6 days  | 95+ years   | 0         | Population Density (500-1000 ppl/sqkm, proportion)     |
| Pedestrian road injuries     | Female | 0-6 days  | 95+ years   | 1         | Rainfall Quintile 5 (proportion)                       |
| Pedestrian road injuries     | Female | 0-6 days  | 95+ years   | 1         | Vehicles - 2+4 wheels (per capita)                     |
| Pedestrian road injuries     | Female | 0-6 days  | 95+ years   | 1         | Vehicles - 2 wheels fraction (proportion)              |
| Pedestrian road injuries     | Female | 0-6 days  | 95+ years   | 1         | Log-transformed SEV scalar: Pedest                     |
| Pedestrian road injuries     | Female | 0-6 days  | 95+ years   | -1        | Socio-demographic Index                                |
| Pedestrian road injuries     | Female | 0-6 days  | 95+ years   | -1        | Healthcare access and quality index                    |
| Pedestrian road injuries     | Male   | 0-6 days  | 95+ years   | 1         | Alcohol (liters per capita)                            |
| Pedestrian road injuries     | Male   | 0-6 days  | 95+ years   | -1        | Education (years per capita)                           |
| Pedestrian road injuries     | Male   | 0-6 days  | 95+ years   | 0         | LDI (\$ per capita)                                    |
| Pedestrian road injuries     | Male   | 0-6 days  | 95+ years   | 0         | Population Density (300-500 ppl/sqkm, proportion)      |
| Pedestrian road injuries     | Male   | 0-6 days  | 95+ years   | 0         | Population Density (500-1000 ppl/sqkm, proportion)     |
| Pedestrian road injuries     | Male   | 0-6 days  | 95+ years   | 1         | Rainfall Quintile 5 (proportion)                       |
| Pedestrian road injuries     | Male   | 0-6 days  | 95+ years   | 1         | Vehicles - 2+4 wheels (per capita)                     |
| Pedestrian road injuries     | Male   | 0-6 days  | 95+ years   | 1         | Vehicles - 2 wheels fraction (proportion)              |
| Pedestrian road injuries     | Male   | 0-6 days  | 95+ years   | 1         | Log-transformed SEV scalar: Pedest                     |
| Pedestrian road injuries     | Male   | 0-6 days  | 95+ years   | -1        | Socio-demographic Index                                |
| Pedestrian road injuries     | Male   | 0-6 days  | 95+ years   | -1        | Healthcare access and quality index                    |
| Cyclist road injuries        | Female | 1-4 years | 95+ years   | 1         | Alcohol (liters per capita)                            |
| Cyclist road injuries        | Female | 1-4 years | 95+ years   | -1        | Education (years per capita)                           |
| Cyclist road injuries        | Female | 1-4 years | 95+ years   | 0         | LDI (\$ per capita)                                    |
| Cyclist road injuries        | Female | 1-4 years | 95+ years   | 0         | Population Density (300-500 ppl/sqkm, proportion)      |
| Cyclist road injuries        | Female | 1-4 years | 95+ years   | 0         | Population Density (500-1000 ppl/sqkm, proportion)     |
| Cyclist road injuries        | Female | 1-4 years | 95+ years   | 1         | Vehicles - 2+4 wheels (per capita)                     |
| Cyclist road injuries        | Female | 1-4 years | 95+ years   | 1         | Vehicles - 2 wheels fraction (proportion)              |
| Cyclist road injuries        | Female | 1-4 years | 95+ years   | 1         | Log-transformed SEV scalar: Cyclist                    |
| Cyclist road injuries        | Female | 1-4 years | 95+ years   | 0         | Socio-demographic Index                                |
| Cyclist road injuries        | Female | 1-4 years | 95+ years   | -1        | Healthcare access and quality index                    |
| Cyclist road injuries        | Male   | 1-4 years | 95+ years   | 1         | Alcohol (liters per capita)                            |
| Cyclist road injuries        | Male   | 1-4 years | 95+ years   | -1        | Education (years per capita)                           |
| Cyclist road injuries        | Male   | 1-4 years | 95+ years   | 0         | LDI (\$ per capita)                                    |
| Cyclist road injuries        | Male   | 1-4 years | 95+ years   | 0         | Population Density (300-500 ppl/sqkm, proportion)      |

| Cause                       | Sex    | Age start   | Age end   | Direction | Covariate                                              |
|-----------------------------|--------|-------------|-----------|-----------|--------------------------------------------------------|
| Cyclist road injuries       | Male   | 1-4 years   | 95+ years | 0         | Population Density (500-1000 ppl/sqkm, proportion)     |
| Cyclist road injuries       | Male   | 1-4 years   | 95+ years | 1         | Vehicles - 2+4 wheels (per capita)                     |
| Cyclist road injuries       | Male   | 1-4 years   | 95+ years | 1         | Vehicles - 2 wheels fraction (proportion)              |
| Cyclist road injuries       | Male   | 1-4 years   | 95+ years | 1         | Log-transformed SEV scalar: Cyclist                    |
| Cyclist road injuries       | Male   | 1-4 years   | 95+ years | 0         | Socio-demographic Index                                |
| Cyclist road injuries       | Male   | 1-4 years   | 95+ years | -1        | Healthcare access and quality index                    |
| Motorcyclist road injuries  | Female | 0-6 days    | 95+ years | 1         | Alcohol (liters per capita)                            |
| Motorcyclist road injuries  | Female | 0-6 days    | 95+ years | -1        | Education (years per capita)                           |
| Motorcyclist road injuries  | Female | 0-6 days    | 95+ years | 0         | LDI (I\$ per capita)                                   |
| Motorcyclist road injuries  | Female | 0-6 days    | 95+ years | 0         | Population Density (300-500 ppl/sqkm, proportion)      |
| Motorcyclist road injuries  | Female | 0-6 days    | 95+ years | 0         | Population Density (500-1000 ppl/sqkm, proportion)     |
| Motorcyclist road injuries  | Female | 0-6 days    | 95+ years | 1         | Rainfall Quintile 5 (proportion)                       |
| Motorcyclist road injuries  | Female | 0-6 days    | 95+ years | 1         | Vehicles - 2 wheels (per capita)                       |
| Motorcyclist road injuries  | Female | 0-6 days    | 95+ years | 1         | Log-transformed SEV scalar: Mot Cyc                    |
| Motorcyclist road injuries  | Female | 0-6 days    | 95+ years | 0         | Socio-demographic Index                                |
| Motorcyclist road injuries  | Female | 0-6 days    | 95+ years | -1        | Healthcare access and quality index                    |
| Motorcyclist road injuries  | Male   | 0-6 days    | 95+ years | 1         | Alcohol (liters per capita)                            |
| Motorcyclist road injuries  | Male   | 0-6 days    | 95+ years | -1        | Education (years per capita)                           |
| Motorcyclist road injuries  | Male   | 0-6 days    | 95+ years | 0         | LDI (I\$ per capita)                                   |
| Motorcyclist road injuries  | Male   | 0-6 days    | 95+ years | 0         | Population Density (300-500 ppl/sqkm, proportion)      |
| Motorcyclist road injuries  | Male   | 0-6 days    | 95+ years | 0         | Population Density (500-1000 ppl/sqkm, proportion)     |
| Motorcyclist road injuries  | Male   | 0-6 days    | 95+ years | 1         | Rainfall Quintile 5 (proportion)                       |
| Motorcyclist road injuries  | Male   | 0-6 days    | 95+ years | 1         | Vehicles - 2 wheels (per capita)                       |
| Motorcyclist road injuries  | Male   | 0-6 days    | 95+ years | 1         | Log-transformed SEV scalar: Mot Cyc                    |
| Motorcyclist road injuries  | Male   | 0-6 days    | 95+ years | 0         | Socio-demographic Index                                |
| Motorcyclist road injuries  | Male   | 0-6 days    | 95+ years | -1        | Healthcare access and quality index                    |
| Motor vehicle road injuries | Female | 0-6 days    | 95+ years | 1         | Alcohol (liters per capita)                            |
| Motor vehicle road injuries | Female | 0-6 days    | 95+ years | 0         | Education (years per capita)                           |
| Motor vehicle road injuries | Female | 0-6 days    | 95+ years | 0         | LDI (I\$ per capita)                                   |
| Motor vehicle road injuries | Female | 0-6 days    | 95+ years | 0         | Population Density (300-500 ppl/sqkm, proportion)      |
| Motor vehicle road injuries | Female | 0-6 days    | 95+ years | 0         | Population Density (500-1000 ppl/sqkm, proportion)     |
| Motor vehicle road injuries | Female | 0-6 days    | 95+ years | 1         | Rainfall Quintile 5 (proportion)                       |
| Motor vehicle road injuries | Female | 0-6 days    | 95+ years | 1         | Vehicles - 4 wheels (per capita)                       |
| Motor vehicle road injuries | Female | 0-6 days    | 95+ years | 1         | Log-transformed SEV scalar: Mot Veh                    |
| Motor vehicle road injuries | Female | 0-6 days    | 95+ years | 0         | Socio-demographic Index                                |
| Motor vehicle road injuries | Female | 0-6 days    | 95+ years | -1        | Healthcare access and quality index                    |
| Motor vehicle road injuries | Male   | 0-6 days    | 95+ years | 1         | Alcohol (liters per capita)                            |
| Motor vehicle road injuries | Male   | 0-6 days    | 95+ years | 0         | Education (years per capita)                           |
| Motor vehicle road injuries | Male   | 0-6 days    | 95+ years | 0         | LDI (I\$ per capita)                                   |
| Motor vehicle road injuries | Male   | 0-6 days    | 95+ years | 0         | Population Density (300-500 ppl/sqkm, proportion)      |
| Motor vehicle road injuries | Male   | 0-6 days    | 95+ years | 0         | Population Density (500-1000 ppl/sqkm, proportion)     |
| Motor vehicle road injuries | Male   | 0-6 days    | 95+ years | 1         | Rainfall Quintile 5 (proportion)                       |
| Motor vehicle road injuries | Male   | 0-6 days    | 95+ years | 1         | Vehicles - 4 wheels (per capita)                       |
| Motor vehicle road injuries | Male   | 0-6 days    | 95+ years | 1         | Log-transformed SEV scalar: Mot Veh                    |
| Motor vehicle road injuries | Male   | 0-6 days    | 95+ years | 0         | Socio-demographic Index                                |
| Motor vehicle road injuries | Male   | 0-6 days    | 95+ years | -1        | Healthcare access and quality index                    |
| Other road injuries         | Female | 0-6 days    | 95+ years | 1         | Alcohol (liters per capita)                            |
| Other road injuries         | Female | 0-6 days    | 95+ years | 0         | LDI (I\$ per capita)                                   |
| Other road injuries         | Female | 0-6 days    | 95+ years | 1         | Rainfall Quintile 5 (proportion)                       |
| Other road injuries         | Female | 0-6 days    | 95+ years | 1         | Vehicles - 2+4 wheels (per capita)                     |
| Other road injuries         | Female | 0-6 days    | 95+ years | 1         | Vehicles - 2 wheels fraction (proportion)              |
| Other road injuries         | Female | 0-6 days    | 95+ years | 1         | Log-transformed SEV scalar: Oth Road                   |
| Other road injuries         | Female | 0-6 days    | 95+ years | -1        | Socio-demographic Index                                |
| Other road injuries         | Female | 0-6 days    | 95+ years | -1        | Healthcare access and quality index                    |
| Other road injuries         | Male   | 0-6 days    | 95+ years | 1         | Alcohol (liters per capita)                            |
| Other road injuries         | Male   | 0-6 days    | 95+ years | 0         | LDI (I\$ per capita)                                   |
| Other road injuries         | Male   | 0-6 days    | 95+ years | 1         | Rainfall Quintile 5 (proportion)                       |
| Other road injuries         | Male   | 0-6 days    | 95+ years | 1         | Vehicles - 2+4 wheels (per capita)                     |
| Other road injuries         | Male   | 0-6 days    | 95+ years | 1         | Vehicles - 2 wheels fraction (proportion)              |
| Other road injuries         | Male   | 0-6 days    | 95+ years | 1         | Log-transformed SEV scalar: Oth Road                   |
| Other road injuries         | Male   | 0-6 days    | 95+ years | -1        | Socio-demographic Index                                |
| Other road injuries         | Male   | 0-6 days    | 95+ years | -1        | Healthcare access and quality index                    |
| Other transport injuries    | Female | 0-6 days    | 95+ years | 1         | Alcohol (liters per capita)                            |
| Other transport injuries    | Female | 0-6 days    | 95+ years | 0         | Education (years per capita)                           |
| Other transport injuries    | Female | 0-6 days    | 95+ years | 0         | LDI (I\$ per capita)                                   |
| Other transport injuries    | Female | 0-6 days    | 95+ years | 0         | Population Density (300-500 ppl/sqkm, proportion)      |
| Other transport injuries    | Female | 0-6 days    | 95+ years | 0         | Population Density (500-1000 ppl/sqkm, proportion)     |
| Other transport injuries    | Female | 0-6 days    | 95+ years | 1         | Rainfall Quintile 5 (proportion)                       |
| Other transport injuries    | Female | 0-6 days    | 95+ years | 1         | Vehicles - 2+4 wheels (per capita)                     |
| Other transport injuries    | Female | 0-6 days    | 95+ years | 1         | Vehicles - 2 wheels fraction (proportion)              |
| Other transport injuries    | Female | 0-6 days    | 95+ years | 1         | Log-transformed SEV scalar: Oth Trans                  |
| Other transport injuries    | Female | 0-6 days    | 95+ years | 0         | Socio-demographic Index                                |
| Other transport injuries    | Female | 0-6 days    | 95+ years | -1        | Healthcare access and quality index                    |
| Other transport injuries    | Male   | 0-6 days    | 95+ years | 1         | Alcohol (liters per capita)                            |
| Other transport injuries    | Male   | 0-6 days    | 95+ years | 0         | Education (years per capita)                           |
| Other transport injuries    | Male   | 0-6 days    | 95+ years | 1         | LDI (I\$ per capita)                                   |
| Other transport injuries    | Male   | 0-6 days    | 95+ years | 0         | Population Density (300-500 ppl/sqkm, proportion)      |
| Other transport injuries    | Male   | 0-6 days    | 95+ years | 0         | Population Density (500-1000 ppl/sqkm, proportion)     |
| Other transport injuries    | Male   | 0-6 days    | 95+ years | 1         | Rainfall Quintile 5 (proportion)                       |
| Other transport injuries    | Male   | 0-6 days    | 95+ years | 1         | Vehicles - 2+4 wheels (per capita)                     |
| Other transport injuries    | Male   | 0-6 days    | 95+ years | 1         | Vehicles - 2 wheels fraction (proportion)              |
| Other transport injuries    | Male   | 0-6 days    | 95+ years | 1         | Log-transformed SEV scalar: Oth Trans                  |
| Other transport injuries    | Male   | 0-6 days    | 95+ years | 0         | Socio-demographic Index                                |
| Other transport injuries    | Male   | 0-6 days    | 95+ years | -1        | Healthcare access and quality index                    |
| Unintentional injuries      | Female | 28-364 days | 95+ years | 1         | Alcohol (liters per capita)                            |
| Unintentional injuries      | Female | 28-364 days | 95+ years | 1         | Cumulative Cigarettes (5 Years)                        |
| Unintentional injuries      | Female | 28-364 days | 95+ years | 1         | Diabetes Fasting Plasma Glucose (mmol/L)               |
| Unintentional injuries      | Female | 28-364 days | 95+ years | -1        | Education (years per capita)                           |
| Unintentional injuries      | Female | 28-364 days | 95+ years | -1        | Health System Access 2 (unitless)                      |
| Unintentional injuries      | Female | 28-364 days | 95+ years | -1        | LDI (I\$ per capita)                                   |
| Unintentional injuries      | Female | 28-364 days | 95+ years | 1         | Underweight (proportion <2SD weight for age, <5 years) |
| Unintentional injuries      | Female | 28-364 days | 95+ years | 1         | Indoor Air Pollution (All Cooking Fuels)               |

| Cause                          | Sex    | Age start   | Age end   | Direction | Covariate                                              |
|--------------------------------|--------|-------------|-----------|-----------|--------------------------------------------------------|
| Unintentional injuries         | Female | 28-364 days | 95+ years | 1         | Population Density (500-1000 ppl/sqkm, proportion)     |
| Unintentional injuries         | Female | 28-364 days | 95+ years | 1         | Population Density (over 1000 ppl/sqkm, proportion)    |
| Unintentional injuries         | Female | 28-364 days | 95+ years | 1         | Smoking Prevalence                                     |
| Unintentional injuries         | Male   | 28-364 days | 95+ years | 1         | Alcohol (liters per capita)                            |
| Unintentional injuries         | Male   | 28-364 days | 95+ years | 1         | Cumulative Cigarettes (5 Years)                        |
| Unintentional injuries         | Male   | 28-364 days | 95+ years | 1         | Diabetes Fasting Plasma Glucose (mmol/L)               |
| Unintentional injuries         | Male   | 28-364 days | 95+ years | -1        | Education (years per capita)                           |
| Unintentional injuries         | Male   | 28-364 days | 95+ years | -1        | Health System Access 2 (unitless)                      |
| Unintentional injuries         | Male   | 28-364 days | 95+ years | -1        | LDI (I\$ per capita)                                   |
| Unintentional injuries         | Male   | 28-364 days | 95+ years | 1         | Underweight (proportion <2SD weight for age, <5 years) |
| Unintentional injuries         | Male   | 28-364 days | 95+ years | 1         | Indoor Air Pollution (All Cooking Fuels)               |
| Unintentional injuries         | Male   | 28-364 days | 95+ years | 1         | Population Density (500-1000 ppl/sqkm, proportion)     |
| Unintentional injuries         | Male   | 28-364 days | 95+ years | 1         | Population Density (over 1000 ppl/sqkm, proportion)    |
| Unintentional injuries         | Male   | 28-364 days | 95+ years | 1         | Smoking Prevalence                                     |
| Falls                          | Female | 0-6 days    | 95+ years | 1         | Alcohol (liters per capita)                            |
| Falls                          | Female | 0-6 days    | 95+ years | 0         | LDI (I\$ per capita)                                   |
| Falls                          | Female | 0-6 days    | 95+ years | -1        | In-Milk (kcal per capita)                              |
| Falls                          | Female | 0-6 days    | 95+ years | 1         | Elevation Over 1500m (proportion)                      |
| Falls                          | Female | 0-6 days    | 95+ years | 1         | Log-transformed SEV scalar: Falls                      |
| Falls                          | Female | 0-6 days    | 95+ years | 0         | Socio-demographic Index                                |
| Falls                          | Female | 0-6 days    | 95+ years | -1        | Healthcare access and quality index                    |
| Falls                          | Male   | 0-6 days    | 95+ years | 1         | Alcohol (liters per capita)                            |
| Falls                          | Male   | 0-6 days    | 95+ years | 0         | LDI (I\$ per capita)                                   |
| Falls                          | Male   | 0-6 days    | 95+ years | -1        | In-Milk (kcal per capita)                              |
| Falls                          | Male   | 0-6 days    | 95+ years | 1         | Elevation Over 1500m (proportion)                      |
| Falls                          | Male   | 0-6 days    | 95+ years | 1         | Log-transformed SEV scalar: Falls                      |
| Falls                          | Male   | 0-6 days    | 95+ years | 0         | Socio-demographic Index                                |
| Falls                          | Male   | 0-6 days    | 95+ years | -1        | Healthcare access and quality index                    |
| Drowning                       | Female | 0-6 days    | 95+ years | 1         | Alcohol (liters per capita)                            |
| Drowning                       | Female | 0-6 days    | 95+ years | 1         | Coastal Population within 10km (proportion)            |
| Drowning                       | Female | 0-6 days    | 95+ years | -1        | Education (years per capita)                           |
| Drowning                       | Female | 0-6 days    | 95+ years | -1        | Landlocked Nation (binary)                             |
| Drowning                       | Female | 0-6 days    | 95+ years | 0         | LDI (I\$ per capita)                                   |
| Drowning                       | Female | 0-6 days    | 95+ years | 1         | Elevation Under 100m (proportion)                      |
| Drowning                       | Female | 0-6 days    | 95+ years | -1        | Rainfall Quintile 1 (proportion)                       |
| Drowning                       | Female | 0-6 days    | 95+ years | 1         | Rainfall Quintile 5 (proportion)                       |
| Drowning                       | Female | 0-6 days    | 95+ years | 1         | Log-transformed SEV scalar: Drown                      |
| Drowning                       | Female | 0-6 days    | 95+ years | -1        | Socio-demographic Index                                |
| Drowning                       | Male   | 0-6 days    | 95+ years | 1         | Alcohol (liters per capita)                            |
| Drowning                       | Male   | 0-6 days    | 95+ years | 1         | Coastal Population within 10km (proportion)            |
| Drowning                       | Male   | 0-6 days    | 95+ years | -1        | Education (years per capita)                           |
| Drowning                       | Male   | 0-6 days    | 95+ years | -1        | Landlocked Nation (binary)                             |
| Drowning                       | Male   | 0-6 days    | 95+ years | 0         | LDI (I\$ per capita)                                   |
| Drowning                       | Male   | 0-6 days    | 95+ years | 1         | Elevation Under 100m (proportion)                      |
| Drowning                       | Male   | 0-6 days    | 95+ years | -1        | Rainfall Quintile 1 (proportion)                       |
| Drowning                       | Male   | 0-6 days    | 95+ years | 1         | Rainfall Quintile 5 (proportion)                       |
| Drowning                       | Male   | 0-6 days    | 95+ years | 1         | Log-transformed SEV scalar: Drown                      |
| Drowning                       | Male   | 0-6 days    | 95+ years | -1        | Socio-demographic Index                                |
| Fire, heat, and hot substances | Female | 0-6 days    | 95+ years | 1         | Alcohol (liters per capita)                            |
| Fire, heat, and hot substances | Female | 0-6 days    | 95+ years | 1         | Tobacco (cigarettes per capita)                        |
| Fire, heat, and hot substances | Female | 0-6 days    | 95+ years | -1        | Education (years per capita)                           |
| Fire, heat, and hot substances | Female | 0-6 days    | 95+ years | 0         | LDI (I\$ per capita)                                   |
| Fire, heat, and hot substances | Female | 0-6 days    | 95+ years | 1         | Indoor Air Pollution (Biomass Cooking)                 |
| Fire, heat, and hot substances | Female | 0-6 days    | 95+ years | 0         | Population Density (over 1000 ppl/sqkm, proportion)    |
| Fire, heat, and hot substances | Female | 0-6 days    | 95+ years | 1         | Log-transformed SEV scalar: Fire                       |
| Fire, heat, and hot substances | Female | 0-6 days    | 95+ years | -1        | Socio-demographic Index                                |
| Fire, heat, and hot substances | Female | 0-6 days    | 95+ years | -1        | Healthcare access and quality index                    |
| Fire, heat, and hot substances | Male   | 0-6 days    | 95+ years | 1         | Alcohol (liters per capita)                            |
| Fire, heat, and hot substances | Male   | 0-6 days    | 95+ years | 1         | Tobacco (cigarettes per capita)                        |
| Fire, heat, and hot substances | Male   | 0-6 days    | 95+ years | -1        | Education (years per capita)                           |
| Fire, heat, and hot substances | Male   | 0-6 days    | 95+ years | 0         | LDI (I\$ per capita)                                   |
| Fire, heat, and hot substances | Male   | 0-6 days    | 95+ years | 1         | Indoor Air Pollution (Biomass Cooking)                 |
| Fire, heat, and hot substances | Male   | 0-6 days    | 95+ years | 0         | Population Density (over 1000 ppl/sqkm, proportion)    |
| Fire, heat, and hot substances | Male   | 0-6 days    | 95+ years | 1         | Log-transformed SEV scalar: Fire                       |
| Fire, heat, and hot substances | Male   | 0-6 days    | 95+ years | -1        | Socio-demographic Index                                |
| Fire, heat, and hot substances | Male   | 0-6 days    | 95+ years | -1        | Healthcare access and quality index                    |
| Poisonings                     | Female | 0-6 days    | 95+ years | -1        | Education (years per capita)                           |
| Poisonings                     | Female | 0-6 days    | 95+ years | 0         | LDI (I\$ per capita)                                   |
| Poisonings                     | Female | 0-6 days    | 95+ years | 1         | Opium Cultivation (binary)                             |
| Poisonings                     | Female | 0-6 days    | 95+ years | 0         | Population Density (over 1000 ppl/sqkm, proportion)    |
| Poisonings                     | Female | 0-6 days    | 95+ years | 0         | Population Density (under 150 ppl/sqkm, proportion)    |
| Poisonings                     | Female | 0-6 days    | 95+ years | 1         | Log-transformed SEV scalar: Poison                     |
| Poisonings                     | Female | 0-6 days    | 95+ years | -1        | Socio-demographic Index                                |
| Poisonings                     | Female | 0-6 days    | 95+ years | -1        | Healthcare access and quality index                    |
| Poisonings                     | Male   | 0-6 days    | 95+ years | -1        | Education (years per capita)                           |
| Poisonings                     | Male   | 0-6 days    | 95+ years | 0         | LDI (I\$ per capita)                                   |
| Poisonings                     | Male   | 0-6 days    | 95+ years | 1         | Opium Cultivation (binary)                             |
| Poisonings                     | Male   | 0-6 days    | 95+ years | 0         | Population Density (over 1000 ppl/sqkm, proportion)    |
| Poisonings                     | Male   | 0-6 days    | 95+ years | 0         | Population Density (under 150 ppl/sqkm, proportion)    |
| Poisonings                     | Male   | 0-6 days    | 95+ years | 1         | Log-transformed SEV scalar: Poison                     |
| Poisonings                     | Male   | 0-6 days    | 95+ years | -1        | Socio-demographic Index                                |
| Poisonings                     | Male   | 0-6 days    | 95+ years | -1        | Healthcare access and quality index                    |
| Exposure to mechanical forces  | Female | 0-6 days    | 95+ years | 1         | Alcohol (liters per capita)                            |
| Exposure to mechanical forces  | Female | 0-6 days    | 95+ years | -1        | Education (years per capita)                           |
| Exposure to mechanical forces  | Female | 0-6 days    | 95+ years | 0         | LDI (I\$ per capita)                                   |
| Exposure to mechanical forces  | Female | 0-6 days    | 95+ years | 0         | Population Density (over 1000 ppl/sqkm, proportion)    |
| Exposure to mechanical forces  | Female | 0-6 days    | 95+ years | 0         | Population Density (under 150 ppl/sqkm, proportion)    |
| Exposure to mechanical forces  | Female | 0-6 days    | 95+ years | -1        | Socio-demographic Index                                |
| Exposure to mechanical forces  | Female | 0-6 days    | 95+ years | -1        | Healthcare access and quality index                    |
| Exposure to mechanical forces  | Male   | 0-6 days    | 95+ years | 1         | Alcohol (liters per capita)                            |
| Exposure to mechanical forces  | Male   | 0-6 days    | 95+ years | -1        | Education (years per capita)                           |
| Exposure to mechanical forces  | Male   | 0-6 days    | 95+ years | 0         | LDI (I\$ per capita)                                   |





| Cause                                           | Sex    | Age start | Age end   | Direction | Covariate                                           |
|-------------------------------------------------|--------|-----------|-----------|-----------|-----------------------------------------------------|
| Venomous animal contact                         | Female | 0-6 days  | 95+ years | -1        | Socio-demographic Index                             |
| Venomous animal contact                         | Female | 0-6 days  | 95+ years | -1        | Healthcare access and quality index                 |
| Venomous animal contact                         | Male   | 0-6 days  | 95+ years | 1         | Alcohol (liters per capita)                         |
| Venomous animal contact                         | Male   | 0-6 days  | 95+ years | -1        | Education (years per capita)                        |
| Venomous animal contact                         | Male   | 0-6 days  | 95+ years | 0         | LDI (I\$ per capita)                                |
| Venomous animal contact                         | Male   | 0-6 days  | 95+ years | 0         | Elevation Over 1500m (proportion)                   |
| Venomous animal contact                         | Male   | 0-6 days  | 95+ years | 0         | Population Density (over 1000 ppl/sqkm, proportion) |
| Venomous animal contact                         | Male   | 0-6 days  | 95+ years | 0         | Population Density (under 150 ppl/sqkm, proportion) |
| Venomous animal contact                         | Male   | 0-6 days  | 95+ years | 0         | Elevation Under 100m (proportion)                   |
| Venomous animal contact                         | Male   | 0-6 days  | 95+ years | 1         | Log-transformed SEV scalar: Venom                   |
| Venomous animal contact                         | Male   | 0-6 days  | 95+ years | -1        | Socio-demographic Index                             |
| Venomous animal contact                         | Male   | 0-6 days  | 95+ years | -1        | Healthcare access and quality index                 |
| Non-venomous animal contact                     | Female | 0-6 days  | 95+ years | 1         | Alcohol (liters per capita)                         |
| Non-venomous animal contact                     | Female | 0-6 days  | 95+ years | -1        | Education (years per capita)                        |
| Non-venomous animal contact                     | Female | 0-6 days  | 95+ years | 0         | LDI (I\$ per capita)                                |
| Non-venomous animal contact                     | Female | 0-6 days  | 95+ years | 0         | Elevation Over 1500m (proportion)                   |
| Non-venomous animal contact                     | Female | 0-6 days  | 95+ years | 0         | Population Density (over 1000 ppl/sqkm, proportion) |
| Non-venomous animal contact                     | Female | 0-6 days  | 95+ years | 0         | Population Density (under 150 ppl/sqkm, proportion) |
| Non-venomous animal contact                     | Female | 0-6 days  | 95+ years | 0         | Elevation Under 100m (proportion)                   |
| Non-venomous animal contact                     | Female | 0-6 days  | 95+ years | 1         | Log-transformed SEV scalar: Non Ven                 |
| Non-venomous animal contact                     | Female | 0-6 days  | 95+ years | -1        | Socio-demographic Index                             |
| Non-venomous animal contact                     | Female | 0-6 days  | 95+ years | -1        | Healthcare access and quality index                 |
| Non-venomous animal contact                     | Male   | 0-6 days  | 95+ years | 1         | Alcohol (liters per capita)                         |
| Non-venomous animal contact                     | Male   | 0-6 days  | 95+ years | -1        | Education (years per capita)                        |
| Non-venomous animal contact                     | Male   | 0-6 days  | 95+ years | 0         | LDI (I\$ per capita)                                |
| Non-venomous animal contact                     | Male   | 0-6 days  | 95+ years | 0         | Elevation Over 1500m (proportion)                   |
| Non-venomous animal contact                     | Male   | 0-6 days  | 95+ years | 0         | Population Density (over 1000 ppl/sqkm, proportion) |
| Non-venomous animal contact                     | Male   | 0-6 days  | 95+ years | 0         | Population Density (under 150 ppl/sqkm, proportion) |
| Non-venomous animal contact                     | Male   | 0-6 days  | 95+ years | 0         | Elevation Under 100m (proportion)                   |
| Non-venomous animal contact                     | Male   | 0-6 days  | 95+ years | 1         | Log-transformed SEV scalar: Non Ven                 |
| Non-venomous animal contact                     | Male   | 0-6 days  | 95+ years | -1        | Socio-demographic Index                             |
| Non-venomous animal contact                     | Male   | 0-6 days  | 95+ years | -1        | Healthcare access and quality index                 |
| Foreign body                                    | Female | 0-6 days  | 95+ years | 1         | Education (years per capita)                        |
| Foreign body                                    | Female | 0-6 days  | 95+ years | 1         | LDI (I\$ per capita)                                |
| Foreign body                                    | Female | 0-6 days  | 95+ years | 1         | Indoor Air Pollution (Coal Cooking)                 |
| Foreign body                                    | Female | 0-6 days  | 95+ years | 1         | Population Density (over 1000 ppl/sqkm, proportion) |
| Foreign body                                    | Female | 0-6 days  | 95+ years | 1         | Population Over 65 (proportion)                     |
| Foreign body                                    | Female | 0-6 days  | 95+ years | 0         | Socio-demographic Index                             |
| Foreign body                                    | Female | 0-6 days  | 95+ years | -1        | Healthcare access and quality index                 |
| Foreign body                                    | Male   | 0-6 days  | 95+ years | 1         | Education (years per capita)                        |
| Foreign body                                    | Male   | 0-6 days  | 95+ years | 1         | LDI (I\$ per capita)                                |
| Foreign body                                    | Male   | 0-6 days  | 95+ years | 1         | Indoor Air Pollution (Coal Cooking)                 |
| Foreign body                                    | Male   | 0-6 days  | 95+ years | 1         | Population Density (over 1000 ppl/sqkm, proportion) |
| Foreign body                                    | Male   | 0-6 days  | 95+ years | 1         | Population Over 65 (proportion)                     |
| Foreign body                                    | Male   | 0-6 days  | 95+ years | 0         | Socio-demographic Index                             |
| Foreign body                                    | Male   | 0-6 days  | 95+ years | -1        | Healthcare access and quality index                 |
| Pulmonary aspiration and foreign body in airway | Female | 0-6 days  | 95+ years | 1         | Alcohol (liters per capita)                         |
| Pulmonary aspiration and foreign body in airway | Female | 0-6 days  | 95+ years | 0         | LDI (I\$ per capita)                                |
| Pulmonary aspiration and foreign body in airway | Female | 0-6 days  | 95+ years | 1         | Mean BMI                                            |
| Pulmonary aspiration and foreign body in airway | Female | 0-6 days  | 95+ years | 1         | Log-transformed SEV scalar: F Body Asp              |
| Pulmonary aspiration and foreign body in airway | Female | 0-6 days  | 95+ years | 0         | Socio-demographic Index                             |
| Pulmonary aspiration and foreign body in airway | Female | 0-6 days  | 95+ years | -1        | Healthcare access and quality index                 |
| Pulmonary aspiration and foreign body in airway | Male   | 0-6 days  | 95+ years | 1         | Alcohol (liters per capita)                         |
| Pulmonary aspiration and foreign body in airway | Male   | 0-6 days  | 95+ years | 0         | LDI (I\$ per capita)                                |
| Pulmonary aspiration and foreign body in airway | Male   | 0-6 days  | 95+ years | 1         | Mean BMI                                            |
| Pulmonary aspiration and foreign body in airway | Male   | 0-6 days  | 95+ years | 1         | Log-transformed SEV scalar: F Body Asp              |
| Pulmonary aspiration and foreign body in airway | Male   | 0-6 days  | 95+ years | 0         | Socio-demographic Index                             |
| Pulmonary aspiration and foreign body in airway | Male   | 0-6 days  | 95+ years | -1        | Healthcare access and quality index                 |
| Foreign body in other body part                 | Female | 0-6 days  | 95+ years | 1         | Alcohol (liters per capita)                         |
| Foreign body in other body part                 | Female | 0-6 days  | 95+ years | -1        | Education (years per capita)                        |
| Foreign body in other body part                 | Female | 0-6 days  | 95+ years | 0         | LDI (I\$ per capita)                                |
| Foreign body in other body part                 | Female | 0-6 days  | 95+ years | 0         | Elevation Over 1500m (proportion)                   |
| Foreign body in other body part                 | Female | 0-6 days  | 95+ years | 0         | Population Density (over 1000 ppl/sqkm, proportion) |
| Foreign body in other body part                 | Female | 0-6 days  | 95+ years | 0         | Population Density (under 150 ppl/sqkm, proportion) |
| Foreign body in other body part                 | Female | 0-6 days  | 95+ years | 0         | Elevation Under 100m (proportion)                   |
| Foreign body in other body part                 | Female | 0-6 days  | 95+ years | 1         | Log-transformed SEV scalar: Oth F Body              |
| Foreign body in other body part                 | Female | 0-6 days  | 95+ years | -1        | Socio-demographic Index                             |
| Foreign body in other body part                 | Female | 0-6 days  | 95+ years | -1        | Healthcare access and quality index                 |
| Foreign body in other body part                 | Male   | 0-6 days  | 95+ years | 1         | Alcohol (liters per capita)                         |
| Foreign body in other body part                 | Male   | 0-6 days  | 95+ years | -1        | Education (years per capita)                        |
| Foreign body in other body part                 | Male   | 0-6 days  | 95+ years | 0         | LDI (I\$ per capita)                                |
| Foreign body in other body part                 | Male   | 0-6 days  | 95+ years | 0         | Elevation Over 1500m (proportion)                   |
| Foreign body in other body part                 | Male   | 0-6 days  | 95+ years | 0         | Population Density (over 1000 ppl/sqkm, proportion) |
| Foreign body in other body part                 | Male   | 0-6 days  | 95+ years | 0         | Population Density (under 150 ppl/sqkm, proportion) |
| Foreign body in other body part                 | Male   | 0-6 days  | 95+ years | 0         | Elevation Under 100m (proportion)                   |
| Foreign body in other body part                 | Male   | 0-6 days  | 95+ years | 1         | Log-transformed SEV scalar: Oth F Body              |
| Foreign body in other body part                 | Male   | 0-6 days  | 95+ years | -1        | Socio-demographic Index                             |
| Foreign body in other body part                 | Male   | 0-6 days  | 95+ years | -1        | Healthcare access and quality index                 |
| Other unintentional injuries                    | Female | 0-6 days  | 95+ years | 1         | Alcohol (liters per capita)                         |
| Other unintentional injuries                    | Female | 0-6 days  | 95+ years | -1        | Education (years per capita)                        |
| Other unintentional injuries                    | Female | 0-6 days  | 95+ years | 0         | LDI (I\$ per capita)                                |
| Other unintentional injuries                    | Female | 0-6 days  | 95+ years | 0         | Elevation Over 1500m (proportion)                   |
| Other unintentional injuries                    | Female | 0-6 days  | 95+ years | 0         | Population Density (over 1000 ppl/sqkm, proportion) |
| Other unintentional injuries                    | Female | 0-6 days  | 95+ years | 0         | Population Density (under 150 ppl/sqkm, proportion) |
| Other unintentional injuries                    | Female | 0-6 days  | 95+ years | 0         | Elevation Under 100m (proportion)                   |
| Other unintentional injuries                    | Female | 0-6 days  | 95+ years | 1         | Vehicles - 2 wheels (per capita)                    |
| Other unintentional injuries                    | Female | 0-6 days  | 95+ years | 0         | Vehicles - 4 wheels (per capita)                    |
| Other unintentional injuries                    | Female | 0-6 days  | 95+ years | 1         | Log-transformed SEV scalar: Oth Unint               |
| Other unintentional injuries                    | Female | 0-6 days  | 95+ years | 0         | Socio-demographic Index                             |
| Other unintentional injuries                    | Female | 0-6 days  | 95+ years | -1        | Healthcare access and quality index                 |
| Other unintentional injuries                    | Male   | 0-6 days  | 95+ years | 1         | Alcohol (liters per capita)                         |
| Other unintentional injuries                    | Male   | 0-6 days  | 95+ years | -1        | Education (years per capita)                        |



| Cause                                | Sex    | Age start   | Age end   | Direction | Covariate                                                       |
|--------------------------------------|--------|-------------|-----------|-----------|-----------------------------------------------------------------|
| Self-harm by other specified means   | Male   | 10-14 years | 95+ years | 0         | Education (years per capita)                                    |
| Self-harm by other specified means   | Male   | 10-14 years | 95+ years | 0         | LDI (I\$ per capita)                                            |
| Self-harm by other specified means   | Male   | 10-14 years | 95+ years | 0         | Population Density (150-300 ppl/sqkm, proportion)               |
| Self-harm by other specified means   | Male   | 10-14 years | 95+ years | 0         | Population Density (300-500 ppl/sqkm, proportion)               |
| Self-harm by other specified means   | Male   | 10-14 years | 95+ years | 0         | Population Density (500-1000 ppl/sqkm, proportion)              |
| Self-harm by other specified means   | Male   | 10-14 years | 95+ years | 0         | Population Density (over 1000 ppl/sqkm, proportion)             |
| Self-harm by other specified means   | Male   | 10-14 years | 95+ years | 0         | Population Density (under 150 ppl/sqkm, proportion)             |
| Self-harm by other specified means   | Male   | 10-14 years | 95+ years | -1        | Religion (binary, >50% Muslim)                                  |
| Self-harm by other specified means   | Male   | 10-14 years | 95+ years | 1         | Log-transformed SEV scalar: Self Harm                           |
| Self-harm by other specified means   | Male   | 10-14 years | 95+ years | 0         | Socio-demographic Index                                         |
| Self-harm by other specified means   | Male   | 10-14 years | 95+ years | 1         | Major depressive disorder                                       |
| Self-harm by other specified means   | Male   | 10-14 years | 95+ years | -1        | Healthcare access and quality index                             |
| Interpersonal violence               | Female | 0-6 days    | 95+ years | 1         | Alcohol (liters per capita)                                     |
| Interpersonal violence               | Female | 0-6 days    | 95+ years | 0         | Education (years per capita)                                    |
| Interpersonal violence               | Female | 0-6 days    | 95+ years | 0         | LDI (I\$ per capita)                                            |
| Interpersonal violence               | Female | 0-6 days    | 95+ years | 1         | Opium Cultivation (binary)                                      |
| Interpersonal violence               | Female | 0-6 days    | 95+ years | 1         | Population Density (over 1000 ppl/sqkm, proportion)             |
| Interpersonal violence               | Female | 0-6 days    | 95+ years | 1         | Log-transformed SEV scalar: Violence                            |
| Interpersonal violence               | Female | 0-6 days    | 95+ years | 0         | Socio-demographic Index                                         |
| Interpersonal violence               | Female | 0-6 days    | 95+ years | -1        | Healthcare access and quality index                             |
| Interpersonal violence               | Male   | 0-6 days    | 95+ years | 1         | Alcohol (liters per capita)                                     |
| Interpersonal violence               | Male   | 0-6 days    | 95+ years | 0         | Education (years per capita)                                    |
| Interpersonal violence               | Male   | 0-6 days    | 95+ years | 0         | LDI (I\$ per capita)                                            |
| Interpersonal violence               | Male   | 0-6 days    | 95+ years | 1         | Opium Cultivation (binary)                                      |
| Interpersonal violence               | Male   | 0-6 days    | 95+ years | 1         | Population Density (over 1000 ppl/sqkm, proportion)             |
| Interpersonal violence               | Male   | 0-6 days    | 95+ years | 1         | Log-transformed SEV scalar: Violence                            |
| Interpersonal violence               | Male   | 0-6 days    | 95+ years | 0         | Socio-demographic Index                                         |
| Interpersonal violence               | Male   | 0-6 days    | 95+ years | -1        | Healthcare access and quality index                             |
| Physical violence by firearm         | Female | 0-6 days    | 95+ years | 1         | Alcohol (liters per capita)                                     |
| Physical violence by firearm         | Female | 0-6 days    | 95+ years | 0         | Education (years per capita)                                    |
| Physical violence by firearm         | Female | 0-6 days    | 95+ years | 0         | LDI (I\$ per capita)                                            |
| Physical violence by firearm         | Female | 0-6 days    | 95+ years | 1         | Opium Cultivation (binary)                                      |
| Physical violence by firearm         | Female | 0-6 days    | 95+ years | 1         | Population Density (over 1000 ppl/sqkm, proportion)             |
| Physical violence by firearm         | Female | 0-6 days    | 95+ years | 1         | Log-transformed SEV scalar: Viol Gun                            |
| Physical violence by firearm         | Female | 0-6 days    | 95+ years | 0         | Socio-demographic Index                                         |
| Physical violence by firearm         | Female | 0-6 days    | 95+ years | -1        | Healthcare access and quality index                             |
| Physical violence by firearm         | Male   | 0-6 days    | 95+ years | 1         | Alcohol (liters per capita)                                     |
| Physical violence by firearm         | Male   | 0-6 days    | 95+ years | 0         | Education (years per capita)                                    |
| Physical violence by firearm         | Male   | 0-6 days    | 95+ years | 0         | LDI (I\$ per capita)                                            |
| Physical violence by firearm         | Male   | 0-6 days    | 95+ years | 1         | Opium Cultivation (binary)                                      |
| Physical violence by firearm         | Male   | 0-6 days    | 95+ years | 1         | Population Density (over 1000 ppl/sqkm, proportion)             |
| Physical violence by firearm         | Male   | 0-6 days    | 95+ years | 1         | Log-transformed SEV scalar: Viol Gun                            |
| Physical violence by firearm         | Male   | 0-6 days    | 95+ years | 0         | Socio-demographic Index                                         |
| Physical violence by firearm         | Male   | 0-6 days    | 95+ years | -1        | Healthcare access and quality index                             |
| Physical violence by sharp object    | Female | 0-6 days    | 95+ years | 1         | Alcohol (liters per capita)                                     |
| Physical violence by sharp object    | Female | 0-6 days    | 95+ years | 0         | Education (years per capita)                                    |
| Physical violence by sharp object    | Female | 0-6 days    | 95+ years | 0         | LDI (I\$ per capita)                                            |
| Physical violence by sharp object    | Female | 0-6 days    | 95+ years | 1         | Opium Cultivation (binary)                                      |
| Physical violence by sharp object    | Female | 0-6 days    | 95+ years | 1         | Population Density (over 1000 ppl/sqkm, proportion)             |
| Physical violence by sharp object    | Female | 0-6 days    | 95+ years | 1         | Log-transformed SEV scalar: Viol Knife                          |
| Physical violence by sharp object    | Female | 0-6 days    | 95+ years | 0         | Socio-demographic Index                                         |
| Physical violence by sharp object    | Female | 0-6 days    | 95+ years | -1        | Healthcare access and quality index                             |
| Physical violence by sharp object    | Male   | 0-6 days    | 95+ years | 1         | Alcohol (liters per capita)                                     |
| Physical violence by sharp object    | Male   | 0-6 days    | 95+ years | 0         | Education (years per capita)                                    |
| Physical violence by sharp object    | Male   | 0-6 days    | 95+ years | 0         | LDI (I\$ per capita)                                            |
| Physical violence by sharp object    | Male   | 0-6 days    | 95+ years | 1         | Opium Cultivation (binary)                                      |
| Physical violence by sharp object    | Male   | 0-6 days    | 95+ years | 1         | Population Density (over 1000 ppl/sqkm, proportion)             |
| Physical violence by sharp object    | Male   | 0-6 days    | 95+ years | 1         | Log-transformed SEV scalar: Viol Knife                          |
| Physical violence by sharp object    | Male   | 0-6 days    | 95+ years | 0         | Socio-demographic Index                                         |
| Physical violence by sharp object    | Male   | 0-6 days    | 95+ years | -1        | Healthcare access and quality index                             |
| Physical violence by other means     | Female | 0-6 days    | 95+ years | 1         | Alcohol (liters per capita)                                     |
| Physical violence by other means     | Female | 0-6 days    | 95+ years | 0         | Education (years per capita)                                    |
| Physical violence by other means     | Female | 0-6 days    | 95+ years | 0         | LDI (I\$ per capita)                                            |
| Physical violence by other means     | Female | 0-6 days    | 95+ years | 1         | Opium Cultivation (binary)                                      |
| Physical violence by other means     | Female | 0-6 days    | 95+ years | 1         | Population Density (over 1000 ppl/sqkm, proportion)             |
| Physical violence by other means     | Female | 0-6 days    | 95+ years | 1         | Log-transformed SEV scalar: Oth Viol                            |
| Physical violence by other means     | Female | 0-6 days    | 95+ years | 0         | Socio-demographic Index                                         |
| Physical violence by other means     | Female | 0-6 days    | 95+ years | -1        | Healthcare access and quality index                             |
| Physical violence by other means     | Male   | 0-6 days    | 95+ years | 1         | Alcohol (liters per capita)                                     |
| Physical violence by other means     | Male   | 0-6 days    | 95+ years | 0         | Education (years per capita)                                    |
| Physical violence by other means     | Male   | 0-6 days    | 95+ years | 0         | LDI (I\$ per capita)                                            |
| Physical violence by other means     | Male   | 0-6 days    | 95+ years | 1         | Opium Cultivation (binary)                                      |
| Physical violence by other means     | Male   | 0-6 days    | 95+ years | 1         | Population Density (over 1000 ppl/sqkm, proportion)             |
| Physical violence by other means     | Male   | 0-6 days    | 95+ years | 1         | Log-transformed SEV scalar: Oth Viol                            |
| Physical violence by other means     | Male   | 0-6 days    | 95+ years | 0         | Socio-demographic Index                                         |
| Physical violence by other means     | Male   | 0-6 days    | 95+ years | -1        | Healthcare access and quality index                             |
| Environmental heat and cold exposure | Female | 0-6 days    | 95+ years | -1        | Education (years per capita)                                    |
| Environmental heat and cold exposure | Female | 0-6 days    | 95+ years | 0         | LDI (I\$ per capita)                                            |
| Environmental heat and cold exposure | Female | 0-6 days    | 95+ years | 0         | Population-weighted mean temperature                            |
| Environmental heat and cold exposure | Female | 0-6 days    | 95+ years | 0         | Elevation Over 1500m (proportion)                               |
| Environmental heat and cold exposure | Female | 0-6 days    | 95+ years | 0         | Elevation 500 to 1500m (proportion)                             |
| Environmental heat and cold exposure | Female | 0-6 days    | 95+ years | 0         | Population Density (150-300 ppl/sqkm, proportion)               |
| Environmental heat and cold exposure | Female | 0-6 days    | 95+ years | 0         | Rainfall (Quintiles 4-5)                                        |
| Environmental heat and cold exposure | Female | 0-6 days    | 95+ years | 0         | Sanitation (proportion with access)                             |
| Environmental heat and cold exposure | Female | 0-6 days    | 95+ years | 0         | 90th percentile climatic temperature in the given country-year. |
| Environmental heat and cold exposure | Female | 0-6 days    | 95+ years | -1        | Socio-demographic Index                                         |
| Environmental heat and cold exposure | Female | 0-6 days    | 95+ years | -1        | Healthcare access and quality index                             |
| Environmental heat and cold exposure | Male   | 0-6 days    | 95+ years | -1        | Education (years per capita)                                    |
| Environmental heat and cold exposure | Male   | 0-6 days    | 95+ years | 0         | LDI (I\$ per capita)                                            |
| Environmental heat and cold exposure | Male   | 0-6 days    | 95+ years | 0         | Population-weighted mean temperature                            |
| Environmental heat and cold exposure | Male   | 0-6 days    | 95+ years | 0         | Elevation Over 1500m (proportion)                               |
| Environmental heat and cold exposure | Male   | 0-6 days    | 95+ years | 0         | Elevation 500 to 1500m (proportion)                             |

| Cause                                | Sex    | Age start   | Age end   | Direction | Covariate                                                       |
|--------------------------------------|--------|-------------|-----------|-----------|-----------------------------------------------------------------|
| Environmental heat and cold exposure | Male   | 0-6 days    | 95+ years | 0         | Population Density (150-300 ppl/sqkm, proportion)               |
| Environmental heat and cold exposure | Male   | 0-6 days    | 95+ years | 0         | Rainfall (Quintiles 4-5)                                        |
| Environmental heat and cold exposure | Male   | 0-6 days    | 95+ years | 0         | Sanitation (proportion with access)                             |
| Environmental heat and cold exposure | Male   | 0-6 days    | 95+ years | 0         | 90th percentile climatic temperature in the given country-year. |
| Environmental heat and cold exposure | Male   | 0-6 days    | 95+ years | -1        | Socio-demographic Index                                         |
| Environmental heat and cold exposure | Male   | 0-6 days    | 95+ years | -1        | Healthcare access and quality index                             |
| Acute lymphoid leukemia              | Female | 0-6 days    | 95+ years | 1         | Alcohol (liters per capita)                                     |
| Acute lymphoid leukemia              | Female | 0-6 days    | 95+ years | 1         | Tobacco (cigarettes per capita)                                 |
| Acute lymphoid leukemia              | Female | 0-6 days    | 95+ years | 1         | Cumulative Cigarettes (10 Years)                                |
| Acute lymphoid leukemia              | Female | 0-6 days    | 95+ years | 1         | Cumulative Cigarettes (15 Years)                                |
| Acute lymphoid leukemia              | Female | 0-6 days    | 95+ years | 1         | Cumulative Cigarettes (20 Years)                                |
| Acute lymphoid leukemia              | Female | 0-6 days    | 95+ years | 1         | Cumulative Cigarettes (5 Years)                                 |
| Acute lymphoid leukemia              | Female | 0-6 days    | 95+ years | -1        | Education (years per capita)                                    |
| Acute lymphoid leukemia              | Female | 0-6 days    | 95+ years | -1        | Health System Access 2 (unitless)                               |
| Acute lymphoid leukemia              | Female | 0-6 days    | 95+ years | 0         | LDI (I\$ per capita)                                            |
| Acute lymphoid leukemia              | Female | 0-6 days    | 95+ years | 1         | Smoking Prevalence                                              |
| Acute lymphoid leukemia              | Female | 0-6 days    | 95+ years | 1         | Log-transformed SEV scalar: Leukemia                            |
| Acute lymphoid leukemia              | Female | 0-6 days    | 95+ years | 1         | Log-transformed age-standardized SEV scalar: Leukemia           |
| Acute lymphoid leukemia              | Female | 0-6 days    | 95+ years | 0         | Socio-demographic Index                                         |
| Acute lymphoid leukemia              | Male   | 0-6 days    | 95+ years | 1         | Alcohol (liters per capita)                                     |
| Acute lymphoid leukemia              | Male   | 0-6 days    | 95+ years | 1         | Tobacco (cigarettes per capita)                                 |
| Acute lymphoid leukemia              | Male   | 0-6 days    | 95+ years | 1         | Cumulative Cigarettes (10 Years)                                |
| Acute lymphoid leukemia              | Male   | 0-6 days    | 95+ years | 1         | Cumulative Cigarettes (15 Years)                                |
| Acute lymphoid leukemia              | Male   | 0-6 days    | 95+ years | 1         | Cumulative Cigarettes (20 Years)                                |
| Acute lymphoid leukemia              | Male   | 0-6 days    | 95+ years | 1         | Cumulative Cigarettes (5 Years)                                 |
| Acute lymphoid leukemia              | Male   | 0-6 days    | 95+ years | -1        | Education (years per capita)                                    |
| Acute lymphoid leukemia              | Male   | 0-6 days    | 95+ years | -1        | Health System Access 2 (unitless)                               |
| Acute lymphoid leukemia              | Male   | 0-6 days    | 95+ years | 0         | LDI (I\$ per capita)                                            |
| Acute lymphoid leukemia              | Male   | 0-6 days    | 95+ years | 1         | Smoking Prevalence                                              |
| Acute lymphoid leukemia              | Male   | 0-6 days    | 95+ years | 1         | Log-transformed SEV scalar: Leukemia                            |
| Acute lymphoid leukemia              | Male   | 0-6 days    | 95+ years | 1         | Log-transformed age-standardized SEV scalar: Leukemia           |
| Acute lymphoid leukemia              | Male   | 0-6 days    | 95+ years | 0         | Socio-demographic Index                                         |
| Chronic lymphoid leukemia            | Male   | 15-19 years | 95+ years | 1         | Alcohol (liters per capita)                                     |
| Chronic lymphoid leukemia            | Male   | 15-19 years | 95+ years | 1         | Tobacco (cigarettes per capita)                                 |
| Chronic lymphoid leukemia            | Male   | 15-19 years | 95+ years | 1         | Cumulative Cigarettes (10 Years)                                |
| Chronic lymphoid leukemia            | Male   | 15-19 years | 95+ years | 1         | Cumulative Cigarettes (15 Years)                                |
| Chronic lymphoid leukemia            | Male   | 15-19 years | 95+ years | 1         | Cumulative Cigarettes (20 Years)                                |
| Chronic lymphoid leukemia            | Male   | 15-19 years | 95+ years | 1         | Cumulative Cigarettes (5 Years)                                 |
| Chronic lymphoid leukemia            | Male   | 15-19 years | 95+ years | -1        | Education (years per capita)                                    |
| Chronic lymphoid leukemia            | Male   | 15-19 years | 95+ years | -1        | Health System Access 2 (unitless)                               |
| Chronic lymphoid leukemia            | Male   | 15-19 years | 95+ years | 0         | LDI (I\$ per capita)                                            |
| Chronic lymphoid leukemia            | Male   | 15-19 years | 95+ years | 1         | Smoking Prevalence                                              |
| Chronic lymphoid leukemia            | Male   | 15-19 years | 95+ years | 1         | Log-transformed SEV scalar: Leukemia                            |
| Chronic lymphoid leukemia            | Male   | 15-19 years | 95+ years | 1         | Log-transformed age-standardized SEV scalar: Leukemia           |
| Chronic lymphoid leukemia            | Male   | 15-19 years | 95+ years | 0         | Socio-demographic Index                                         |
| Chronic lymphoid leukemia            | Female | 15-19 years | 95+ years | 1         | Alcohol (liters per capita)                                     |
| Chronic lymphoid leukemia            | Female | 15-19 years | 95+ years | 1         | Tobacco (cigarettes per capita)                                 |
| Chronic lymphoid leukemia            | Female | 15-19 years | 95+ years | 1         | Cumulative Cigarettes (10 Years)                                |
| Chronic lymphoid leukemia            | Female | 15-19 years | 95+ years | 1         | Cumulative Cigarettes (15 Years)                                |
| Chronic lymphoid leukemia            | Female | 15-19 years | 95+ years | 1         | Cumulative Cigarettes (20 Years)                                |
| Chronic lymphoid leukemia            | Female | 15-19 years | 95+ years | 1         | Cumulative Cigarettes (5 Years)                                 |
| Chronic lymphoid leukemia            | Female | 15-19 years | 95+ years | -1        | Education (years per capita)                                    |
| Chronic lymphoid leukemia            | Female | 15-19 years | 95+ years | -1        | Health System Access 2 (unitless)                               |
| Chronic lymphoid leukemia            | Female | 15-19 years | 95+ years | 0         | LDI (I\$ per capita)                                            |
| Chronic lymphoid leukemia            | Female | 15-19 years | 95+ years | 1         | Smoking Prevalence                                              |
| Chronic lymphoid leukemia            | Female | 15-19 years | 95+ years | 1         | Log-transformed SEV scalar: Leukemia                            |
| Chronic lymphoid leukemia            | Female | 15-19 years | 95+ years | 1         | Log-transformed age-standardized SEV scalar: Leukemia           |
| Chronic lymphoid leukemia            | Female | 15-19 years | 95+ years | 0         | Socio-demographic Index                                         |
| Acute myeloid leukemia               | Female | 0-6 days    | 95+ years | 1         | Alcohol (liters per capita)                                     |
| Acute myeloid leukemia               | Female | 0-6 days    | 95+ years | 1         | Tobacco (cigarettes per capita)                                 |
| Acute myeloid leukemia               | Female | 0-6 days    | 95+ years | 1         | Cumulative Cigarettes (10 Years)                                |
| Acute myeloid leukemia               | Female | 0-6 days    | 95+ years | 1         | Cumulative Cigarettes (15 Years)                                |
| Acute myeloid leukemia               | Female | 0-6 days    | 95+ years | 1         | Cumulative Cigarettes (20 Years)                                |
| Acute myeloid leukemia               | Female | 0-6 days    | 95+ years | 1         | Cumulative Cigarettes (5 Years)                                 |
| Acute myeloid leukemia               | Female | 0-6 days    | 95+ years | -1        | Education (years per capita)                                    |
| Acute myeloid leukemia               | Female | 0-6 days    | 95+ years | -1        | Health System Access 2 (unitless)                               |
| Acute myeloid leukemia               | Female | 0-6 days    | 95+ years | 0         | LDI (I\$ per capita)                                            |
| Acute myeloid leukemia               | Female | 0-6 days    | 95+ years | 1         | Smoking Prevalence                                              |
| Acute myeloid leukemia               | Female | 0-6 days    | 95+ years | 1         | Log-transformed SEV scalar: Leukemia                            |
| Acute myeloid leukemia               | Female | 0-6 days    | 95+ years | 1         | Log-transformed age-standardized SEV scalar: Leukemia           |
| Acute myeloid leukemia               | Female | 0-6 days    | 95+ years | 0         | Socio-demographic Index                                         |
| Acute myeloid leukemia               | Male   | 0-6 days    | 95+ years | 1         | Alcohol (liters per capita)                                     |
| Acute myeloid leukemia               | Male   | 0-6 days    | 95+ years | 1         | Tobacco (cigarettes per capita)                                 |
| Acute myeloid leukemia               | Male   | 0-6 days    | 95+ years | 1         | Cumulative Cigarettes (10 Years)                                |
| Acute myeloid leukemia               | Male   | 0-6 days    | 95+ years | 1         | Cumulative Cigarettes (15 Years)                                |
| Acute myeloid leukemia               | Male   | 0-6 days    | 95+ years | 1         | Cumulative Cigarettes (20 Years)                                |
| Acute myeloid leukemia               | Male   | 0-6 days    | 95+ years | 1         | Cumulative Cigarettes (5 Years)                                 |
| Acute myeloid leukemia               | Male   | 0-6 days    | 95+ years | -1        | Education (years per capita)                                    |
| Acute myeloid leukemia               | Male   | 0-6 days    | 95+ years | -1        | Health System Access 2 (unitless)                               |
| Acute myeloid leukemia               | Male   | 0-6 days    | 95+ years | 0         | LDI (I\$ per capita)                                            |
| Acute myeloid leukemia               | Male   | 0-6 days    | 95+ years | 1         | Smoking Prevalence                                              |
| Acute myeloid leukemia               | Male   | 0-6 days    | 95+ years | 1         | Log-transformed SEV scalar: Leukemia                            |
| Acute myeloid leukemia               | Male   | 0-6 days    | 95+ years | 1         | Log-transformed age-standardized SEV scalar: Leukemia           |
| Acute myeloid leukemia               | Male   | 0-6 days    | 95+ years | 0         | Socio-demographic Index                                         |
| Acute myeloid leukemia               | Male   | 0-6 days    | 95+ years | -1        | Health System Access (capped)                                   |
| Acute myeloid leukemia               | Male   | 0-6 days    | 95+ years | -1        | Healthcare access and quality index                             |
| Chronic myeloid leukemia             | Female | 28-364 days | 95+ years | 1         | Alcohol (liters per capita)                                     |
| Chronic myeloid leukemia             | Female | 28-364 days | 95+ years | 1         | Tobacco (cigarettes per capita)                                 |
| Chronic myeloid leukemia             | Female | 28-364 days | 95+ years | 1         | Cumulative Cigarettes (10 Years)                                |
| Chronic myeloid leukemia             | Female | 28-364 days | 95+ years | 1         | Cumulative Cigarettes (15 Years)                                |
| Chronic myeloid leukemia             | Female | 28-364 days | 95+ years | 1         | Cumulative Cigarettes (20 Years)                                |
| Chronic myeloid leukemia             | Female | 28-364 days | 95+ years | 1         | Cumulative Cigarettes (5 Years)                                 |

| Cause                                              | Sex    | Age start   | Age end   | Direction | Covariate                                             |
|----------------------------------------------------|--------|-------------|-----------|-----------|-------------------------------------------------------|
| Chronic myeloid leukemia                           | Female | 28-364 days | 95+ years | -1        | Education (years per capita)                          |
| Chronic myeloid leukemia                           | Female | 28-364 days | 95+ years | 1         | Health System Access 2 (unitless)                     |
| Chronic myeloid leukemia                           | Female | 28-364 days | 95+ years | 0         | LDI (IS per capita)                                   |
| Chronic myeloid leukemia                           | Female | 28-364 days | 95+ years | 1         | Smoking Prevalence                                    |
| Chronic myeloid leukemia                           | Female | 28-364 days | 95+ years | 1         | Log-transformed age-standardized SEV scalar: Leukemia |
| Chronic myeloid leukemia                           | Female | 28-364 days | 95+ years | 0         | Socio-demographic Index                               |
| Chronic myeloid leukemia                           | Female | 28-364 days | 95+ years | -1        | Healthcare access and quality index                   |
| Chronic myeloid leukemia                           | Female | 28-364 days | 95+ years | -1        | Health System Access 2 (unitless)                     |
| Chronic myeloid leukemia                           | Male   | 28-364 days | 95+ years | 1         | Alcohol (liters per capita)                           |
| Chronic myeloid leukemia                           | Male   | 28-364 days | 95+ years | 1         | Tobacco (cigarettes per capita)                       |
| Chronic myeloid leukemia                           | Male   | 28-364 days | 95+ years | 1         | Cumulative Cigarettes (10 Years)                      |
| Chronic myeloid leukemia                           | Male   | 28-364 days | 95+ years | 1         | Cumulative Cigarettes (15 Years)                      |
| Chronic myeloid leukemia                           | Male   | 28-364 days | 95+ years | 1         | Cumulative Cigarettes (20 Years)                      |
| Chronic myeloid leukemia                           | Male   | 28-364 days | 95+ years | 1         | Cumulative Cigarettes (5 Years)                       |
| Chronic myeloid leukemia                           | Male   | 28-364 days | 95+ years | -1        | Education (years per capita)                          |
| Chronic myeloid leukemia                           | Male   | 28-364 days | 95+ years | 1         | Health System Access 2 (unitless)                     |
| Chronic myeloid leukemia                           | Male   | 28-364 days | 95+ years | 0         | LDI (IS per capita)                                   |
| Chronic myeloid leukemia                           | Male   | 28-364 days | 95+ years | 1         | Smoking Prevalence                                    |
| Chronic myeloid leukemia                           | Male   | 28-364 days | 95+ years | 1         | Log-transformed age-standardized SEV scalar: Leukemia |
| Chronic myeloid leukemia                           | Male   | 28-364 days | 95+ years | 0         | Socio-demographic Index                               |
| Chronic myeloid leukemia                           | Male   | 28-364 days | 95+ years | -1        | Healthcare access and quality index                   |
| Non-melanoma skin cancer (squamous-cell carcinoma) | Male   | 28-364 days | 95+ years | 1         | Cumulative Cigarettes (10 Years)                      |
| Non-melanoma skin cancer (squamous-cell carcinoma) | Male   | 28-364 days | 95+ years | 1         | Cumulative Cigarettes (15 Years)                      |
| Non-melanoma skin cancer (squamous-cell carcinoma) | Male   | 28-364 days | 95+ years | 1         | Cumulative Cigarettes (5 Years)                       |
| Non-melanoma skin cancer (squamous-cell carcinoma) | Male   | 28-364 days | 95+ years | -1        | Education (years per capita)                          |
| Non-melanoma skin cancer (squamous-cell carcinoma) | Male   | 28-364 days | 95+ years | 0         | Average latitude                                      |
| Non-melanoma skin cancer (squamous-cell carcinoma) | Male   | 28-364 days | 95+ years | 0         | LDI (IS per capita)                                   |
| Non-melanoma skin cancer (squamous-cell carcinoma) | Male   | 28-364 days | 95+ years | 1         | Smoking Prevalence                                    |
| Non-melanoma skin cancer (squamous-cell carcinoma) | Male   | 28-364 days | 95+ years | 0         | Socio-demographic Index                               |
| Non-melanoma skin cancer (squamous-cell carcinoma) | Male   | 28-364 days | 95+ years | -1        | Healthcare access and quality index                   |
| Non-melanoma skin cancer (squamous-cell carcinoma) | Male   | 28-364 days | 95+ years | -1        | Health System Access (capped)                         |
| Non-melanoma skin cancer (squamous-cell carcinoma) | Female | 28-364 days | 95+ years | 1         | Cumulative Cigarettes (10 Years)                      |
| Non-melanoma skin cancer (squamous-cell carcinoma) | Female | 28-364 days | 95+ years | 1         | Cumulative Cigarettes (15 Years)                      |
| Non-melanoma skin cancer (squamous-cell carcinoma) | Female | 28-364 days | 95+ years | 1         | Cumulative Cigarettes (5 Years)                       |
| Non-melanoma skin cancer (squamous-cell carcinoma) | Female | 28-364 days | 95+ years | -1        | Education (years per capita)                          |
| Non-melanoma skin cancer (squamous-cell carcinoma) | Female | 28-364 days | 95+ years | 0         | Average latitude                                      |
| Non-melanoma skin cancer (squamous-cell carcinoma) | Female | 28-364 days | 95+ years | 0         | LDI (IS per capita)                                   |
| Non-melanoma skin cancer (squamous-cell carcinoma) | Female | 28-364 days | 95+ years | 1         | Smoking Prevalence                                    |
| Non-melanoma skin cancer (squamous-cell carcinoma) | Female | 28-364 days | 95+ years | 0         | Socio-demographic Index                               |
| Non-melanoma skin cancer (squamous-cell carcinoma) | Female | 28-364 days | 95+ years | -1        | Healthcare access and quality index                   |
| Non-melanoma skin cancer (squamous-cell carcinoma) | Female | 28-364 days | 95+ years | -1        | Health System Access (capped)                         |
| Executions and police conflict                     | Female | 28-364 days | 95+ years | 1         | Alcohol (liters per capita)                           |
| Executions and police conflict                     | Female | 28-364 days | 95+ years | 1         | Education (years per capita)                          |
| Executions and police conflict                     | Female | 28-364 days | 95+ years | 0         | LDI (IS per capita)                                   |
| Executions and police conflict                     | Female | 28-364 days | 95+ years | 1         | Population Density (over 1000 ppl/sqkm, proportion)   |
| Executions and police conflict                     | Female | 28-364 days | 95+ years | 0         | Socio-demographic Index                               |
| Executions and police conflict                     | Female | 28-364 days | 95+ years | -1        | Healthcare access and quality index                   |
| Executions and police conflict                     | Male   | 28-364 days | 95+ years | 1         | Alcohol (liters per capita)                           |
| Executions and police conflict                     | Male   | 28-364 days | 95+ years | 1         | Education (years per capita)                          |
| Executions and police conflict                     | Male   | 28-364 days | 95+ years | 0         | LDI (IS per capita)                                   |
| Executions and police conflict                     | Male   | 28-364 days | 95+ years | 1         | Population Density (over 1000 ppl/sqkm, proportion)   |
| Executions and police conflict                     | Male   | 28-364 days | 95+ years | 0         | Socio-demographic Index                               |
| Executions and police conflict                     | Male   | 28-364 days | 95+ years | -1        | Healthcare access and quality index                   |
| Alcoholic cardiomyopathy                           | Male   | 15-19 years | 95+ years | 1         | Alcohol (liters per capita)                           |
| Alcoholic cardiomyopathy                           | Male   | 15-19 years | 95+ years | -1        | LDI (IS per capita)                                   |
| Alcoholic cardiomyopathy                           | Male   | 15-19 years | 95+ years | 1         | Smoking Prevalence                                    |
| Alcoholic cardiomyopathy                           | Male   | 15-19 years | 95+ years | 1         | Log-transformed SEV scalar: CMP                       |
| Alcoholic cardiomyopathy                           | Male   | 15-19 years | 95+ years | 0         | Socio-demographic Index                               |
| Alcoholic cardiomyopathy                           | Male   | 15-19 years | 95+ years | -1        | Healthcare access and quality index                   |
| Alcoholic cardiomyopathy                           | Female | 15-19 years | 95+ years | 1         | Alcohol (liters per capita)                           |
| Alcoholic cardiomyopathy                           | Female | 15-19 years | 95+ years | -1        | LDI (IS per capita)                                   |
| Alcoholic cardiomyopathy                           | Female | 15-19 years | 95+ years | 1         | Smoking Prevalence                                    |
| Alcoholic cardiomyopathy                           | Female | 15-19 years | 95+ years | 1         | Log-transformed SEV scalar: CMP                       |
| Alcoholic cardiomyopathy                           | Female | 15-19 years | 95+ years | 0         | Socio-demographic Index                               |
| Alcoholic cardiomyopathy                           | Female | 15-19 years | 95+ years | -1        | Healthcare access and quality index                   |
| Myocarditis                                        | Male   | 0-6 days    | 95+ years | -1        | LDI (IS per capita)                                   |
| Myocarditis                                        | Male   | 0-6 days    | 95+ years | 1         | Systolic Blood Pressure (mmHg)                        |
| Myocarditis                                        | Male   | 0-6 days    | 95+ years | 1         | Log-transformed SEV scalar: CMP                       |
| Myocarditis                                        | Male   | 0-6 days    | 95+ years | 0         | Socio-demographic Index                               |
| Myocarditis                                        | Male   | 0-6 days    | 95+ years | -1        | Healthcare access and quality index                   |
| Myocarditis                                        | Female | 0-6 days    | 95+ years | -1        | LDI (IS per capita)                                   |
| Myocarditis                                        | Female | 0-6 days    | 95+ years | 1         | Systolic Blood Pressure (mmHg)                        |
| Myocarditis                                        | Female | 0-6 days    | 95+ years | 1         | Log-transformed SEV scalar: CMP                       |
| Myocarditis                                        | Female | 0-6 days    | 95+ years | 0         | Socio-demographic Index                               |
| Myocarditis                                        | Female | 0-6 days    | 95+ years | -1        | Healthcare access and quality index                   |
| Other leukemia                                     | Female | 0-6 days    | 95+ years | 1         | Alcohol (liters per capita)                           |
| Other leukemia                                     | Female | 0-6 days    | 95+ years | 1         | Tobacco (cigarettes per capita)                       |
| Other leukemia                                     | Female | 0-6 days    | 95+ years | 1         | Cumulative Cigarettes (10 Years)                      |
| Other leukemia                                     | Female | 0-6 days    | 95+ years | 1         | Cumulative Cigarettes (15 Years)                      |
| Other leukemia                                     | Female | 0-6 days    | 95+ years | 1         | Cumulative Cigarettes (20 Years)                      |
| Other leukemia                                     | Female | 0-6 days    | 95+ years | 1         | Cumulative Cigarettes (5 Years)                       |
| Other leukemia                                     | Female | 0-6 days    | 95+ years | -1        | Education (years per capita)                          |
| Other leukemia                                     | Female | 0-6 days    | 95+ years | -1        | Health System Access 2 (unitless)                     |
| Other leukemia                                     | Female | 0-6 days    | 95+ years | 0         | LDI (IS per capita)                                   |
| Other leukemia                                     | Female | 0-6 days    | 95+ years | 1         | Smoking Prevalence                                    |
| Other leukemia                                     | Female | 0-6 days    | 95+ years | 1         | Log-transformed SEV scalar: Leukemia                  |
| Other leukemia                                     | Female | 0-6 days    | 95+ years | 0         | Socio-demographic Index                               |
| Other leukemia                                     | Male   | 0-6 days    | 95+ years | 1         | Alcohol (liters per capita)                           |
| Other leukemia                                     | Male   | 0-6 days    | 95+ years | 1         | Tobacco (cigarettes per capita)                       |
| Other leukemia                                     | Male   | 0-6 days    | 95+ years | 1         | Cumulative Cigarettes (10 Years)                      |
| Other leukemia                                     | Male   | 0-6 days    | 95+ years | 1         | Cumulative Cigarettes (15 Years)                      |
| Other leukemia                                     | Male   | 0-6 days    | 95+ years | 1         | Cumulative Cigarettes (20 Years)                      |

| Cause                | Sex    | Age start | Age end   | Direction | Covariate                            |
|----------------------|--------|-----------|-----------|-----------|--------------------------------------|
| Other leukemia       | Male   | 0-6 days  | 95+ years | 1         | Cumulative Cigarettes (5 Years)      |
| Other leukemia       | Male   | 0-6 days  | 95+ years | -1        | Education (years per capita)         |
| Other leukemia       | Male   | 0-6 days  | 95+ years | -1        | Health System Access 2 (unitless)    |
| Other leukemia       | Male   | 0-6 days  | 95+ years | 0         | LDI (\$ per capita)                  |
| Other leukemia       | Male   | 0-6 days  | 95+ years | 1         | Smoking Prevalence                   |
| Other leukemia       | Male   | 0-6 days  | 95+ years | 1         | Log-transformed SEV scalar: Leukemia |
| Other leukemia       | Male   | 0-6 days  | 95+ years | 0         | Socio-demographic Index              |
| Other cardiomyopathy | Male   | 0-6 days  | 95+ years | 0         | LDI (\$ per capita)                  |
| Other cardiomyopathy | Male   | 0-6 days  | 95+ years | 1         | Mean BMI                             |
| Other cardiomyopathy | Male   | 0-6 days  | 95+ years | 1         | Systolic Blood Pressure (mmHg)       |
| Other cardiomyopathy | Male   | 0-6 days  | 95+ years | 1         | Smoking Prevalence                   |
| Other cardiomyopathy | Male   | 0-6 days  | 95+ years | 1         | Log-transformed SEV scalar: CMP      |
| Other cardiomyopathy | Male   | 0-6 days  | 95+ years | 0         | Socio-demographic Index              |
| Other cardiomyopathy | Male   | 0-6 days  | 95+ years | -1        | Healthcare access and quality index  |
| Other cardiomyopathy | Female | 0-6 days  | 95+ years | 0         | LDI (\$ per capita)                  |
| Other cardiomyopathy | Female | 0-6 days  | 95+ years | 1         | Mean BMI                             |
| Other cardiomyopathy | Female | 0-6 days  | 95+ years | 1         | Systolic Blood Pressure (mmHg)       |
| Other cardiomyopathy | Female | 0-6 days  | 95+ years | 1         | Smoking Prevalence                   |
| Other cardiomyopathy | Female | 0-6 days  | 95+ years | 1         | Log-transformed SEV scalar: CMP      |
| Other cardiomyopathy | Female | 0-6 days  | 95+ years | 0         | Socio-demographic Index              |
| Other cardiomyopathy | Female | 0-6 days  | 95+ years | -1        | Healthcare access and quality index  |

Note: Only causes modeled in CODEm are included in this table.

| Appendix Table 7: CODEm predictive validity results by cause, model type, sex and age |        |             |             |                     |          |          |           |             |              |
|---------------------------------------------------------------------------------------|--------|-------------|-------------|---------------------|----------|----------|-----------|-------------|--------------|
| Cause                                                                                 | Sex    | Age start   | Age end     | Predictive validity |          |          |           |             |              |
|                                                                                       |        |             |             | RMSE in             | RMSE out | Trend in | Trend out | Coverage in | Coverage out |
| Tuberculosis [Data Rich]                                                              | Male   | 28-364 days | 95+ years   | 0.215               | 0.290663 | 0.158269 | 0.19286   | 0.998172    | 0.997832     |
| Tuberculosis [Data Rich]                                                              | Female | 28-364 days | 95+ years   | 0.227834            | 0.304096 | 0.171612 | 0.190148  | 0.999074    | 0.998916     |
| Tuberculosis [Global]                                                                 | Male   | 28-364 days | 95+ years   | 0.266763            | 0.554971 | 0.182005 | 0.189306  | 0.997872    | 0.984566     |
| Tuberculosis [Global]                                                                 | Female | 28-364 days | 95+ years   | 0.293493            | 0.562544 | 0.206357 | 0.218106  | 0.998348    | 0.989498     |
| Diarrheal diseases [Data Rich]                                                        | Male   | 5-9 years   | 95+ years   | 0.260188            | 0.412346 | 0.178844 | 0.22131   | 0.998746    | 0.998187     |
| Diarrheal diseases [Data Rich]                                                        | Female | 5-9 years   | 95+ years   | 0.263644            | 0.430796 | 0.173641 | 0.217233  | 0.999102    | 0.997645     |
| Diarrheal diseases [Data Rich]                                                        | Male   | 0-6 days    | 1-4 years   | 0.291264            | 0.399911 | 0.202778 | 0.237484  | 0.999247    | 0.997926     |
| Diarrheal diseases [Data Rich]                                                        | Female | 0-6 days    | 1-4 years   | 0.310597            | 0.447646 | 0.214774 | 0.269036  | 0.999718    | 0.998627     |
| Diarrheal diseases [Global]                                                           | Male   | 0-6 days    | 1-4 years   | 0.434522            | 0.744318 | 0.395664 | 0.335957  | 0.996876    | 0.979921     |
| Diarrheal diseases [Global]                                                           | Female | 0-6 days    | 1-4 years   | 0.609676            | 0.885548 | 0.615259 | 0.595206  | 0.987641    | 0.969406     |
| Diarrheal diseases [Global]                                                           | Male   | 5-9 years   | 95+ years   | 0.593177            | 0.820709 | 0.221108 | 0.230704  | 0.998677    | 0.992382     |
| Diarrheal diseases [Global]                                                           | Female | 5-9 years   | 95+ years   | 0.702521            | 0.909839 | 0.224528 | 0.225686  | 0.99859     | 0.990582     |
| Lower respiratory infections [Data Rich]                                              | Male   | 5-9 years   | 95+ years   | 0.234029            | 0.269537 | 0.162368 | 0.177752  | 0.999581    | 0.998811     |
| Lower respiratory infections [Data Rich]                                              | Female | 5-9 years   | 95+ years   | 0.220305            | 0.262284 | 0.153727 | 0.173579  | 0.999538    | 0.998862     |
| Lower respiratory infections [Data Rich]                                              | Male   | 0-6 days    | 1-4 years   | 0.227551            | 0.285988 | 0.165418 | 0.177683  | 0.999445    | 0.998995     |
| Lower respiratory infections [Data Rich]                                              | Female | 0-6 days    | 1-4 years   | 0.209089            | 0.258665 | 0.157661 | 0.168262  | 0.999497    | 0.999122     |
| Lower respiratory infections [Global]                                                 | Male   | 5-9 years   | 95+ years   | 0.260677            | 0.387475 | 0.170636 | 0.177396  | 0.99941     | 0.982564     |
| Lower respiratory infections [Global]                                                 | Female | 5-9 years   | 95+ years   | 0.250004            | 0.373532 | 0.165361 | 0.168838  | 0.999414    | 0.984828     |
| Lower respiratory infections [Global]                                                 | Male   | 0-6 days    | 1-4 years   | 0.302338            | 0.421668 | 0.237586 | 0.240214  | 0.999266    | 0.996159     |
| Lower respiratory infections [Global]                                                 | Female | 0-6 days    | 1-4 years   | 0.509912            | 0.604757 | 0.524133 | 0.538764  | 0.989438    | 0.99011      |
| Otitis media [Data Rich]                                                              | Male   | 0-6 days    | 95+ years   | 0.80783             | 1.27793  | 0.656615 | 0.751022  | 0.98036     | 0.96598      |
| Otitis media [Data Rich]                                                              | Female | 0-6 days    | 95+ years   | 0.954315            | 1.4309   | 0.781543 | 0.887359  | 0.977749    | 0.966411     |
| Otitis media [Global]                                                                 | Male   | 0-6 days    | 95+ years   | 0.978189            | 1.9251   | 0.744172 | 0.770198  | 0.984208    | 0.940004     |
| Otitis media [Global]                                                                 | Female | 0-6 days    | 95+ years   | 1.08283             | 2.09452  | 0.886791 | 0.912335  | 0.979917    | 0.943021     |
| Meningitis [Data Rich]                                                                | Female | 0-6 days    | 1-4 years   | 0.227251            | 0.286452 | 0.168505 | 0.179066  | 0.99994     | 0.999792     |
| Meningitis [Data Rich]                                                                | Male   | 0-6 days    | 1-4 years   | 0.217133            | 0.293263 | 0.165997 | 0.186117  | 0.999742    | 0.999392     |
| Meningitis [Data Rich]                                                                | Male   | 5-9 years   | 95+ years   | 0.221134            | 0.274598 | 0.155961 | 0.181331  | 0.999782    | 0.999751     |
| Meningitis [Data Rich]                                                                | Female | 5-9 years   | 95+ years   | 0.203069            | 0.264481 | 0.15643  | 0.177261  | 0.999846    | 0.999717     |
| Meningitis [Global]                                                                   | Male   | 0-6 days    | 1-4 years   | 0.453445            | 0.592801 | 0.456659 | 0.436136  | 0.997884    | 0.995251     |
| Meningitis [Global]                                                                   | Male   | 5-9 years   | 95+ years   | 0.356454            | 0.521145 | 0.195612 | 0.192864  | 0.999168    | 0.991943     |
| Meningitis [Global]                                                                   | Female | 5-9 years   | 95+ years   | 0.284985            | 0.451238 | 0.20056  | 0.199594  | 0.999381    | 0.993424     |
| Meningitis [Global]                                                                   | Female | 0-6 days    | 1-4 years   | 0.479021            | 0.626508 | 0.411725 | 0.410701  | 0.998549    | 0.996621     |
| Encephalitis [Data Rich]                                                              | Male   | 0-6 days    | 95+ years   | 0.338783            | 0.402217 | 0.192527 | 0.208962  | 0.999402    | 0.999068     |
| Encephalitis [Data Rich]                                                              | Female | 0-6 days    | 95+ years   | 0.330985            | 0.411304 | 0.202173 | 0.219034  | 0.999328    | 0.998734     |
| Encephalitis [Global]                                                                 | Female | 0-6 days    | 95+ years   | 0.401236            | 0.574391 | 0.237659 | 0.237301  | 0.998179    | 0.991936     |
| Encephalitis [Global]                                                                 | Male   | 0-6 days    | 95+ years   | 0.382378            | 0.586235 | 0.233583 | 0.239432  | 0.998333    | 0.993793     |
| Tetanus [Data Rich]                                                                   | Male   | 0-6 days    | 28-364 days | 0.262789            | 0.398543 | 0.176924 | 0.190741  | 0.998514    | 0.997497     |
| Tetanus [Data Rich]                                                                   | Male   | 1-4 years   | 95+ years   | 0.462905            | 0.662019 | 0.342756 | 0.462735  | 0.993155    | 0.990457     |
| Tetanus [Data Rich]                                                                   | Female | 0-6 days    | 28-364 days | 0.26901             | 0.36596  | 0.199243 | 0.216329  | 0.997234    | 0.995847     |
| Tetanus [Data Rich]                                                                   | Female | 1-4 years   | 95+ years   | 0.615402            | 0.905134 | 0.497505 | 0.694547  | 0.990264    | 0.98442      |
| Tetanus [Global]                                                                      | Male   | 1-4 years   | 95+ years   | 0.791375            | 1.33448  | 0.427707 | 0.433831  | 0.876308    | 0.861525     |
| Tetanus [Global]                                                                      | Female | 1-4 years   | 95+ years   | 0.941868            | 1.66892  | 0.569802 | 0.603951  | 0.803236    | 0.786193     |
| Tetanus [Global]                                                                      | Male   | 0-6 days    | 28-364 days | 0.763632            | 1.11789  | 0.792085 | 0.816737  | 0.989984    | 0.981245     |
| Tetanus [Global]                                                                      | Female | 0-6 days    | 28-364 days | 0.476031            | 0.796513 | 0.359683 | 0.352221  | 0.995943    | 0.986366     |
| Dengue [Data Rich]                                                                    | Male   | 28-364 days | 95+ years   | 0.792214            | 1.43589  | 0.631339 | 0.712322  | 0.98911     | 0.974209     |
| Dengue [Data Rich]                                                                    | Female | 28-364 days | 95+ years   | 0.858796            | 1.47929  | 0.666952 | 0.707776  | 0.986963    | 0.971324     |
| Dengue [Global]                                                                       | Male   | 28-364 days | 95+ years   | 0.966394            | 1.67507  | 0.716596 | 0.733445  | 0.991796    | 0.963767     |
| Dengue [Global]                                                                       | Female | 28-364 days | 95+ years   | 1.10131             | 1.72147  | 0.757119 | 0.765851  | 0.989802    | 0.961986     |
| Rabies [Data Rich]                                                                    | Male   | 28-364 days | 95+ years   | 0.699144            | 1.25076  | 0.538206 | 0.612419  | 0.987567    | 0.979502     |
| Rabies [Data Rich]                                                                    | Female | 28-364 days | 95+ years   | 0.808708            | 1.29669  | 0.652356 | 0.736316  | 0.98552     | 0.975258     |
| Rabies [Global]                                                                       | Male   | 28-364 days | 95+ years   | 0.871281            | 1.56847  | 0.622116 | 0.65464   | 0.987114    | 0.943583     |
| Rabies [Global]                                                                       | Female | 28-364 days | 95+ years   | 0.997179            | 1.74661  | 0.744593 | 0.760267  | 0.986128    | 0.94132      |
| Other neglected tropical diseases [Data Rich]                                         | Male   | 0-6 days    | 95+ years   | 0.730435            | 1.01929  | 0.50383  | 0.607178  | 0.763046    | 0.75864      |
| Other neglected tropical diseases [Data Rich]                                         | Female | 0-6 days    | 95+ years   | 0.889485            | 1.22512  | 0.560578 | 0.713816  | 0.754629    | 0.748807     |
| Other neglected tropical diseases [Global]                                            | Male   | 0-6 days    | 95+ years   | 0.725231            | 1.45248  | 0.538638 | 0.572286  | 0.800666    | 0.773569     |
| Other neglected tropical diseases [Global]                                            | Female | 0-6 days    | 95+ years   | 0.903404            | 1.50944  | 0.593172 | 0.607687  | 0.792532    | 0.77471      |
| Neonatal disorders [Global]                                                           | Male   | 0-6 days    | 1-4 years   | 0.251735            | 0.393248 | 0.188497 | 0.187199  | 0.998926    | 0.996798     |
| Neonatal disorders [Data Rich]                                                        | Male   | 0-6 days    | 1-4 years   | 0.187097            | 0.268444 | 0.13252  | 0.171404  | 0.998844    | 0.99836      |
| Neonatal disorders [Global]                                                           | Female | 0-6 days    | 1-4 years   | 0.253708            | 0.403142 | 0.195319 | 0.200811  | 0.998746    | 0.995669     |
| Neonatal disorders [Data Rich]                                                        | Female | 0-6 days    | 1-4 years   | 0.197921            | 0.281678 | 0.144814 | 0.191145  | 0.998989    | 0.998673     |
| Neonatal preterm birth complications [Global]                                         | Male   | 0-6 days    | 1-4 years   | 0.282625            | 0.452417 | 0.214695 | 0.217553  | 0.999035    | 0.993238     |
| Neonatal preterm birth complications [Data Rich]                                      | Male   | 0-6 days    | 1-4 years   | 0.214052            | 0.409643 | 0.150158 | 0.193849  | 0.999149    | 0.997901     |
| Neonatal preterm birth complications [Global]                                         | Female | 0-6 days    | 1-4 years   | 0.287359            | 0.447133 | 0.222089 | 0.227474  | 0.998968    | 0.994749     |
| Neonatal preterm birth complications [Data Rich]                                      | Female | 0-6 days    | 1-4 years   | 0.21014             | 0.385184 | 0.148401 | 0.182017  | 0.999568    | 0.998899     |
| Neonatal encephalopathy due to birth asphyxia and trauma [Global]                     | Male   | 0-6 days    | 1-4 years   | 0.304664            | 0.505542 | 0.236226 | 0.239528  | 0.998957    | 0.993741     |
| Neonatal encephalopathy due to birth asphyxia and trauma [Data Rich]                  | Male   | 0-6 days    | 1-4 years   | 0.227063            | 0.398435 | 0.166646 | 0.201266  | 0.999359    | 0.998783     |
| Neonatal encephalopathy due to birth asphyxia and trauma [Global]                     | Female | 0-6 days    | 1-4 years   | 0.346123            | 0.504788 | 0.319674 | 0.309837  | 0.998797    | 0.997005     |
| Neonatal encephalopathy due to birth asphyxia and trauma [Data Rich]                  | Female | 0-6 days    | 1-4 years   | 0.228414            | 0.387198 | 0.168209 | 0.212277  | 0.999393    | 0.998642     |
| Neonatal sepsis and other neonatal infections [Global]                                | Male   | 0-6 days    | 1-4 years   | 0.532539            | 1.23454  | 0.294492 | 0.311711  | 0.892151    | 0.896508     |
| Neonatal sepsis and other neonatal infections [Global]                                | Female | 0-6 days    | 1-4 years   | 0.669042            | 1.42104  | 0.383821 | 0.394836  | 0.870375    | 0.852562     |
| Neonatal sepsis and other neonatal infections [Data Rich]                             | Male   | 0-6 days    | 1-4 years   | 0.447373            | 0.876858 | 0.277257 | 0.319579  | 0.857269    | 0.856019     |
| Neonatal sepsis and other neonatal infections [Data Rich]                             | Female | 0-6 days    | 1-4 years   | 0.628724            | 1.20107  | 0.365662 | 0.447297  | 0.834308    | 0.829203     |
| Hemolytic disease and other neonatal jaundice [Global]                                | Male   | 0-6 days    | 1-4 years   | 0.726108            | 1.52314  | 0.573364 | 0.606741  | 0.856138    | 0.817497     |
| Hemolytic disease and other neonatal jaundice [Global]                                | Female | 0-6 days    | 1-4 years   | 1.09727             | 1.8017   | 0.922907 | 0.952495  | 0.949447    | 0.88901      |
| Hemolytic disease and other neonatal jaundice [Data Rich]                             | Male   | 0-6 days    | 1-4 years   | 0.690351            | 1.1874   | 0.549088 | 0.614396  | 0.84053     | 0.843519     |
| Hemolytic disease and other neonatal jaundice [Data Rich]                             | Female | 0-6 days    | 1-4 years   | 1.13302             | 1.84559  | 0.894736 | 1.08171   | 0.916511    | 0.915447     |
| Other neonatal disorders [Global]                                                     | Male   | 0-6 days    | 1-4 years   | 0.323398            | 0.54171  | 0.219666 | 0.241994  | 0.999443    | 0.998945     |
| Other neonatal disorders [Data Rich]                                                  | Male   | 0-6 days    | 1-4 years   | 0.285551            | 0.531978 | 0.194984 | 0.261102  | 0.999445    | 0.998329     |
| Other neonatal disorders [Data Rich]                                                  | Female | 0-6 days    | 1-4 years   | 0.310883            | 0.552746 | 0.217544 | 0.29129   | 0.999502    | 0.998131     |

| Cause                                                   | Sex    | Age start   | Age end   | Predictive validity               |          |          |           |             |              |
|---------------------------------------------------------|--------|-------------|-----------|-----------------------------------|----------|----------|-----------|-------------|--------------|
|                                                         |        |             |           | RMSE in                           | RMSE out | Trend in | Trend out | Coverage in | Coverage out |
|                                                         |        |             |           | Other neonatal disorders [Global] | Female   | 0-6 days | 1-4 years | 0.36519     | 0.599204     |
| Nutritional deficiencies [Data Rich]                    | Male   | 28-364 days | 95+ years | 0.28739                           | 0.407494 | 0.211942 | 0.290737  | 0.992712    | 0.991782     |
| Nutritional deficiencies [Data Rich]                    | Female | 28-364 days | 95+ years | 0.31077                           | 0.451309 | 0.229425 | 0.328584  | 0.992692    | 0.992032     |
| Nutritional deficiencies [Global]                       | Male   | 28-364 days | 95+ years | 0.409342                          | 0.729816 | 0.367633 | 0.361245  | 0.991799    | 0.970887     |
| Nutritional deficiencies [Global]                       | Female | 28-364 days | 95+ years | 0.395379                          | 0.701908 | 0.325345 | 0.344961  | 0.992996    | 0.972574     |
| Protein-energy malnutrition [Data Rich]                 | Male   | 5-9 years   | 95+ years | 0.57212                           | 0.836607 | 0.31749  | 0.457325  | 0.949678    | 0.95218      |
| Protein-energy malnutrition [Data Rich]                 | Male   | 28-364 days | 1-4 years | 0.26374                           | 0.389118 | 0.201965 | 0.217493  | 0.998186    | 0.995996     |
| Protein-energy malnutrition [Data Rich]                 | Female | 28-364 days | 1-4 years | 0.358163                          | 0.531938 | 0.267771 | 0.317653  | 0.996928    | 0.993492     |
| Protein-energy malnutrition [Data Rich]                 | Female | 5-9 years   | 95+ years | 0.575876                          | 0.82491  | 0.317591 | 0.459951  | 0.937556    | 0.941932     |
| Protein-energy malnutrition [Global]                    | Male   | 28-364 days | 1-4 years | 0.345688                          | 0.749728 | 0.260672 | 0.276509  | 0.995837    | 0.967912     |
| Protein-energy malnutrition [Global]                    | Female | 28-364 days | 1-4 years | 0.415796                          | 0.754333 | 0.303049 | 0.307893  | 0.995262    | 0.972418     |
| Protein-energy malnutrition [Global]                    | Female | 5-9 years   | 95+ years | 0.472788                          | 0.95306  | 0.338641 | 0.362599  | 0.944598    | 0.918248     |
| Protein-energy malnutrition [Global]                    | Male   | 5-9 years   | 95+ years | 0.476147                          | 0.965199 | 0.345501 | 0.360691  | 0.954718    | 0.931593     |
| Iron-deficiency anemia [Data Rich]                      | Male   | 28-364 days | 95+ years | 1.17192                           | 1.94642  | 0.391732 | 0.47263   | 0.552362    | 0.555995     |
| Iron-deficiency anemia [Data Rich]                      | Female | 28-364 days | 95+ years | 1.42962                           | 2.32066  | 0.519641 | 0.649806  | 0.461096    | 0.457159     |
| Iron-deficiency anemia [Global]                         | Male   | 28-364 days | 95+ years | 0.789979                          | 1.97513  | 0.487322 | 0.501456  | 0.605681    | 0.623655     |
| Iron-deficiency anemia [Global]                         | Female | 28-364 days | 95+ years | 0.940939                          | 2.32384  | 0.691811 | 0.7491    | 0.565307    | 0.584283     |
| Other nutritional deficiencies [Data Rich]              | Female | 28-364 days | 95+ years | 0.380559                          | 0.628123 | 0.283098 | 0.379927  | 0.96161     | 0.962371     |
| Other nutritional deficiencies [Data Rich]              | Male   | 28-364 days | 95+ years | 0.373415                          | 0.564897 | 0.265085 | 0.322379  | 0.935165    | 0.936115     |
| Other nutritional deficiencies [Global]                 | Female | 28-364 days | 95+ years | 0.451049                          | 0.797499 | 0.317317 | 0.325292  | 0.966734    | 0.954653     |
| Other nutritional deficiencies [Global]                 | Male   | 28-364 days | 95+ years | 0.440019                          | 0.786416 | 0.297718 | 0.303868  | 0.944318    | 0.931872     |
| Sexually transmitted diseases excluding HIV [Data Rich] | Male   | 10-14 years | 95+ years | 0.592869                          | 0.766912 | 0.466048 | 0.57587   | 0.990302    | 0.984586     |
| Sexually transmitted diseases excluding HIV [Data Rich] | Female | 10-14 years | 95+ years | 0.353387                          | 0.551968 | 0.26404  | 0.376584  | 0.982085    | 0.983247     |
| Sexually transmitted diseases excluding HIV [Global]    | Male   | 10-14 years | 95+ years | 0.783455                          | 1.35215  | 0.58237  | 0.605353  | 0.896837    | 0.873158     |
| Sexually transmitted diseases excluding HIV [Global]    | Female | 10-14 years | 95+ years | 0.48871                           | 0.767613 | 0.403017 | 0.385015  | 0.983025    | 0.9708       |
| Hepatitis [Data Rich]                                   | Female | 28-364 days | 95+ years | 0.347159                          | 0.513666 | 0.246796 | 0.284031  | 0.999045    | 0.998112     |
| Hepatitis [Global]                                      | Female | 28-364 days | 95+ years | 0.399657                          | 0.785077 | 0.28208  | 0.300865  | 0.998931    | 0.978401     |
| Hepatitis [Data Rich]                                   | Male   | 28-364 days | 95+ years | 0.343624                          | 0.479052 | 0.248477 | 0.29235   | 0.999118    | 0.998335     |
| Hepatitis [Global]                                      | Male   | 28-364 days | 95+ years | 0.397275                          | 0.770546 | 0.290714 | 0.293805  | 0.998418    | 0.982748     |
| Other infectious diseases [Data Rich]                   | Male   | 0-6 days    | 95+ years | 0.257632                          | 0.378812 | 0.194259 | 0.229884  | 0.998943    | 0.99817      |
| Other infectious diseases [Global]                      | Male   | 0-6 days    | 95+ years | 0.388113                          | 0.605983 | 0.326699 | 0.331726  | 0.998603    | 0.991416     |
| Other infectious diseases [Data Rich]                   | Female | 0-6 days    | 95+ years | 0.353856                          | 0.471172 | 0.257697 | 0.301628  | 0.998184    | 0.99719      |
| Other infectious diseases [Global]                      | Female | 0-6 days    | 95+ years | 0.44921                           | 0.62668  | 0.382637 | 0.368739  | 0.997717    | 0.9911       |
| Esophageal cancer [Data Rich]                           | Male   | 15-19 years | 95+ years | 0.198433                          | 0.245255 | 0.161804 | 0.185832  | 0.998919    | 0.997968     |
| Esophageal cancer [Data Rich]                           | Female | 15-19 years | 95+ years | 0.215283                          | 0.268253 | 0.179366 | 0.206173  | 0.998593    | 0.997497     |
| Esophageal cancer [Global]                              | Female | 15-19 years | 95+ years | 0.272331                          | 0.449786 | 0.211737 | 0.217784  | 0.997501    | 0.980359     |
| Esophageal cancer [Global]                              | Male   | 15-19 years | 95+ years | 0.238675                          | 0.413533 | 0.185874 | 0.189452  | 0.997966    | 0.980274     |
| Stomach cancer [Data Rich]                              | Male   | 15-19 years | 95+ years | 0.168624                          | 0.204856 | 0.135969 | 0.153663  | 0.998632    | 0.997638     |
| Stomach cancer [Data Rich]                              | Female | 15-19 years | 95+ years | 0.174226                          | 0.211966 | 0.142399 | 0.164469  | 0.998495    | 0.99713      |
| Stomach cancer [Global]                                 | Female | 15-19 years | 95+ years | 0.204713                          | 0.321435 | 0.162978 | 0.160719  | 0.99867     | 0.984612     |
| Stomach cancer [Global]                                 | Male   | 15-19 years | 95+ years | 0.196924                          | 0.307854 | 0.153815 | 0.152673  | 0.998643    | 0.980242     |
| Liver cancer [Global]                                   | Male   | 5-9 years   | 95+ years | 0.269051                          | 0.454562 | 0.209164 | 0.210674  | 0.998031    | 0.986505     |
| Liver cancer [Data Rich]                                | Male   | 5-9 years   | 95+ years | 0.2413                            | 0.325407 | 0.191496 | 0.224282  | 0.998065    | 0.996981     |
| Liver cancer [Global]                                   | Female | 5-9 years   | 95+ years | 0.277507                          | 0.413467 | 0.216708 | 0.218733  | 0.998803    | 0.991523     |
| Liver cancer [Data Rich]                                | Female | 5-9 years   | 95+ years | 0.232587                          | 0.30673  | 0.193079 | 0.226226  | 0.998381    | 0.997116     |
| Larynx cancer [Data Rich]                               | Male   | 15-19 years | 95+ years | 0.200641                          | 0.252556 | 0.161284 | 0.192664  | 0.997858    | 0.997282     |
| Larynx cancer [Data Rich]                               | Female | 15-19 years | 95+ years | 0.30673                           | 0.388496 | 0.253812 | 0.302646  | 0.975795    | 0.977395     |
| Larynx cancer [Global]                                  | Male   | 15-19 years | 95+ years | 0.234619                          | 0.374157 | 0.181438 | 0.191236  | 0.998393    | 0.986868     |
| Larynx cancer [Global]                                  | Female | 15-19 years | 95+ years | 0.356904                          | 0.5464   | 0.283167 | 0.287904  | 0.98139     | 0.973441     |
| Tracheal, bronchus, and lung cancer [Data Rich]         | Female | 15-19 years | 95+ years | 0.188871                          | 0.231498 | 0.154034 | 0.189452  | 0.998449    | 0.997224     |
| Tracheal, bronchus, and lung cancer [Data Rich]         | Male   | 15-19 years | 95+ years | 0.181641                          | 0.221799 | 0.146639 | 0.164353  | 0.99861     | 0.997327     |
| Tracheal, bronchus, and lung cancer [Global]            | Female | 15-19 years | 95+ years | 0.225478                          | 0.304297 | 0.174547 | 0.175022  | 0.998643    | 0.995915     |
| Tracheal, bronchus, and lung cancer [Global]            | Male   | 15-19 years | 95+ years | 0.212545                          | 0.307851 | 0.166159 | 0.169413  | 0.998557    | 0.990068     |
| Breast cancer [Data Rich]                               | Male   | 15-19 years | 95+ years | 0.339918                          | 0.42271  | 0.265862 | 0.31327   | 0.97947     | 0.976519     |
| Breast cancer [Data Rich]                               | Female | 15-19 years | 95+ years | 0.192908                          | 0.233432 | 0.155652 | 0.179595  | 0.996331    | 0.993547     |
| Breast cancer [Global]                                  | Female | 15-19 years | 95+ years | 0.211224                          | 0.287481 | 0.162086 | 0.167525  | 0.997149    | 0.990481     |
| Breast cancer [Global]                                  | Male   | 15-19 years | 95+ years | 0.423524                          | 0.594604 | 0.313547 | 0.315621  | 0.979072    | 0.968179     |
| Cervical cancer [Data Rich]                             | Female | 15-19 years | 95+ years | 0.193564                          | 0.239786 | 0.156019 | 0.182773  | 0.998702    | 0.997568     |
| Cervical cancer [Global]                                | Female | 15-19 years | 95+ years | 0.244551                          | 0.350403 | 0.188472 | 0.186523  | 0.999189    | 0.990516     |
| Uterine cancer [Global]                                 | Female | 15-19 years | 95+ years | 0.26113                           | 0.405926 | 0.203732 | 0.230708  | 0.999474    | 0.993606     |
| Uterine cancer [Data Rich]                              | Female | 15-19 years | 95+ years | 0.215364                          | 0.272806 | 0.172502 | 0.20594   | 0.999534    | 0.998942     |
| Prostate cancer [Data Rich]                             | Male   | 15-19 years | 95+ years | 0.25085                           | 0.303217 | 0.204423 | 0.237726  | 0.996921    | 0.994794     |
| Prostate cancer [Global]                                | Male   | 15-19 years | 95+ years | 0.29197                           | 0.370344 | 0.218901 | 0.21368   | 0.996743    | 0.986557     |
| Colon and rectum cancer [Data Rich]                     | Male   | 15-19 years | 95+ years | 0.185598                          | 0.224739 | 0.152051 | 0.172096  | 0.998745    | 0.997677     |
| Colon and rectum cancer [Data Rich]                     | Female | 15-19 years | 95+ years | 0.195509                          | 0.240842 | 0.161929 | 0.192825  | 0.998011    | 0.996491     |
| Colon and rectum cancer [Global]                        | Male   | 15-19 years | 95+ years | 0.208621                          | 0.291093 | 0.166006 | 0.167229  | 0.999046    | 0.991509     |
| Colon and rectum cancer [Global]                        | Female | 15-19 years | 95+ years | 0.215863                          | 0.294113 | 0.171992 | 0.168904  | 0.998465    | 0.990486     |
| Lip and oral cavity cancer [Data Rich]                  | Male   | 15-19 years | 95+ years | 0.207908                          | 0.252841 | 0.168893 | 0.183409  | 0.999097    | 0.998219     |
| Lip and oral cavity cancer [Data Rich]                  | Female | 15-19 years | 95+ years | 0.217054                          | 0.273426 | 0.177172 | 0.204022  | 0.999549    | 0.999077     |
| Lip and oral cavity cancer [Global]                     | Male   | 15-19 years | 95+ years | 0.252937                          | 0.355882 | 0.20016  | 0.196201  | 0.998305    | 0.991385     |
| Lip and oral cavity cancer [Global]                     | Female | 15-19 years | 95+ years | 0.252204                          | 0.349135 | 0.192715 | 0.197068  | 0.999507    | 0.995154     |
| Nasopharynx cancer [Data Rich]                          | Female | 5-9 years   | 95+ years | 0.305983                          | 0.418084 | 0.256857 | 0.342077  | 0.991357    | 0.991272     |
| Nasopharynx cancer [Data Rich]                          | Male   | 5-9 years   | 95+ years | 0.256041                          | 0.343061 | 0.207344 | 0.249863  | 0.998424    | 0.997617     |
| Nasopharynx cancer [Global]                             | Female | 5-9 years   | 95+ years | 0.361818                          | 0.574134 | 0.287872 | 0.294643  | 0.990987    | 0.982361     |
| Nasopharynx cancer [Global]                             | Male   | 5-9 years   | 95+ years | 0.303468                          | 0.507949 | 0.238899 | 0.243384  | 0.998489    | 0.987144     |
| Other pharynx cancer [Data Rich]                        | Male   | 15-19 years | 95+ years | 0.243933                          | 0.316171 | 0.196356 | 0.221139  | 0.99611     | 0.995076     |
| Other pharynx cancer [Data Rich]                        | Female | 15-19 years | 95+ years | 0.257668                          | 0.327035 | 0.210857 | 0.248682  | 0.994188    | 0.993541     |
| Other pharynx cancer [Global]                           | Male   | 15-19 years | 95+ years | 0.287334                          | 0.46305  | 0.218922 | 0.209273  | 0.996444    | 0.987678     |
| Other pharynx cancer [Global]                           | Female | 15-19 years | 95+ years | 0.319571                          | 0.475567 | 0.248676 | 0.243749  | 0.994634    | 0.987119     |
| Gallbladder and biliary tract cancer [Data Rich]        | Female | 15-19 years | 95+ years | 0.203972                          | 0.267017 | 0.165798 | 0.189961  | 0.995926    | 0.994112     |
| Gallbladder and biliary tract cancer [Data Rich]        | Male   | 15-19 years | 95+ years | 0.200502                          | 0.247264 | 0.162741 | 0.182337  | 0.997554    | 0.996224     |
| Gallbladder and biliary tract cancer [Global]           | Female | 15-19 years | 95+ years | 0.24119                           | 0.382075 | 0.18688  | 0.183792  | 0.99678     | 0.982529     |
| Gallbladder and biliary tract cancer [Global]           | Male   | 15-19 years | 95+ years | 0.261043                          | 0.375592 | 0.187773 | 0.184805  | 0.998613    | 0.998089     |
| Pancreatic cancer [Data Rich]                           | Male   | 15-19 years | 95+ years | 0.173161                          | 0.212802 | 0.140106 | 0.151654  | 0.998714    | 0.997757     |
| Pancreatic cancer [Data Rich]                           | Female | 15-19 years | 95+ years | 0.19234                           | 0.240872 | 0.158471 | 0.180492  | 0.997995    | 0.996599     |
| Pancreatic cancer [Global]                              | Male   | 15-19 years | 95+ years | 0.198254                          | 0.284044 | 0.152835 | 0.151022  | 0.998854    | 0.995525     |
| Pancreatic cancer [Global]                              | Female | 15-19 years | 95+ years | 0.209814                          | 0.286474 | 0.168889 | 0.166741  | 0.998889    | 0.996591     |
| Malignant skin melanoma [Data Rich]                     | Male   | 15-19 years | 95+ years | 0.258707                          | 0.324742 | 0.207811 | 0.237785  | 0.999191    | 0.998467     |
| Malignant skin melanoma [Data Rich]                     | Female | 15-19 years | 95+ years | 0.256129                          | 0.301867 | 0.200431 | 0.216407  | 0.998728    | 0.997828     |



| Cause                                       | Sex    | Age start   | Age end   | Predictive validity |          |          |           |             |              |
|---------------------------------------------|--------|-------------|-----------|---------------------|----------|----------|-----------|-------------|--------------|
|                                             |        |             |           | RMSE in             | RMSE out | Trend in | Trend out | Coverage in | Coverage out |
|                                             |        |             |           |                     |          |          |           |             |              |
| Malignant skin melanoma [Global]            | Male   | 15-19 years | 95+ years | 0.296332            | 0.434735 | 0.225174 | 0.226407  | 0.998842    | 0.994037     |
| Malignant skin melanoma [Global]            | Female | 15-19 years | 95+ years | 0.292432            | 0.42973  | 0.222704 | 0.226799  | 0.998281    | 0.991761     |
| Non-melanoma skin cancer [Data Rich]        | Male   | 15-19 years | 95+ years | 0.155711            | 0.239935 | 0.112916 | 0.133783  | 0.99981     | 0.999603     |
| Non-melanoma skin cancer [Data Rich]        | Female | 15-19 years | 95+ years | 0.214155            | 0.309436 | 0.159857 | 0.183713  | 0.997395    | 0.997199     |
| Non-melanoma skin cancer [Global]           | Female | 15-19 years | 95+ years | 0.291672            | 0.489846 | 0.209023 | 0.217962  | 0.994887    | 0.985998     |
| Non-melanoma skin cancer [Global]           | Male   | 15-19 years | 95+ years | 0.192737            | 0.330459 | 0.136252 | 0.14092   | 0.999232    | 0.995604     |
| Ovarian cancer [Data Rich]                  | Female | 15-19 years | 95+ years | 0.195794            | 0.246041 | 0.157071 | 0.173662  | 0.998842    | 0.997833     |
| Ovarian cancer [Global]                     | Female | 15-19 years | 95+ years | 0.218013            | 0.313157 | 0.166727 | 0.167835  | 0.999174    | 0.994091     |
| Testicular cancer [Global]                  | Male   | 15-19 years | 95+ years | 0.328371            | 0.529164 | 0.255669 | 0.25659   | 0.999375    | 0.995125     |
| Testicular cancer [Data Rich]               | Male   | 15-19 years | 95+ years | 0.283022            | 0.371326 | 0.232189 | 0.243099  | 0.999645    | 0.999282     |
| Kidney cancer [Data Rich]                   | Male   | 0-6 days    | 95+ years | 0.241409            | 0.355526 | 0.19905  | 0.233492  | 0.999066    | 0.998706     |
| Kidney cancer [Data Rich]                   | Female | 0-6 days    | 95+ years | 0.269859            | 0.399459 | 0.223989 | 0.265876  | 0.998886    | 0.997983     |
| Kidney cancer [Global]                      | Male   | 0-6 days    | 95+ years | 0.280428            | 0.40437  | 0.224896 | 0.23264   | 0.999225    | 0.994304     |
| Kidney cancer [Global]                      | Female | 0-6 days    | 95+ years | 0.309672            | 0.434952 | 0.251863 | 0.260629  | 0.999065    | 0.992195     |
| Bladder cancer [Data Rich]                  | Male   | 15-19 years | 95+ years | 0.238162            | 0.289199 | 0.193221 | 0.21405   | 0.998893    | 0.9979       |
| Bladder cancer [Global]                     | Male   | 15-19 years | 95+ years | 0.259512            | 0.358356 | 0.20438  | 0.211875  | 0.998849    | 0.993972     |
| Bladder cancer [Global]                     | Female | 15-19 years | 95+ years | 0.279362            | 0.406151 | 0.217047 | 0.218843  | 0.995797    | 0.992228     |
| Bladder cancer [Data Rich]                  | Female | 15-19 years | 95+ years | 0.241778            | 0.308128 | 0.197425 | 0.236098  | 0.995139    | 0.99458      |
| Brain and nervous system cancer [Data Rich] | Female | 0-6 days    | 95+ years | 0.233403            | 0.3046   | 0.177532 | 0.189069  | 0.998845    | 0.997948     |
| Brain and nervous system cancer [Global]    | Female | 0-6 days    | 95+ years | 0.302238            | 0.394989 | 0.217704 | 0.215738  | 0.998871    | 0.995489     |
| Brain and nervous system cancer [Data Rich] | Male   | 0-6 days    | 95+ years | 0.216468            | 0.277928 | 0.168084 | 0.183155  | 0.998868    | 0.997924     |
| Brain and nervous system cancer [Global]    | Male   | 0-6 days    | 95+ years | 0.27435             | 0.374644 | 0.204471 | 0.20185   | 0.998951    | 0.996187     |
| Thyroid cancer [Data Rich]                  | Female | 10-14 years | 95+ years | 0.428862            | 0.514646 | 0.348096 | 0.339467  | 0.988448    | 0.986206     |
| Thyroid cancer [Data Rich]                  | Male   | 10-14 years | 95+ years | 0.325439            | 0.400471 | 0.258836 | 0.251195  | 0.990913    | 0.991523     |
| Thyroid cancer [Global]                     | Female | 10-14 years | 95+ years | 0.452233            | 0.57687  | 0.360692 | 0.356627  | 0.990555    | 0.981127     |
| Thyroid cancer [Global]                     | Male   | 10-14 years | 95+ years | 0.365192            | 0.48212  | 0.280751 | 0.28231   | 0.992984    | 0.989187     |
| Mesothelioma [Data Rich]                    | Female | 15-19 years | 95+ years | 0.196941            | 0.304164 | 0.152258 | 0.219033  | 0.998746    | 0.998454     |
| Mesothelioma [Data Rich]                    | Male   | 15-19 years | 95+ years | 0.172967            | 0.285052 | 0.128708 | 0.171164  | 0.999971    | 0.999797     |
| Mesothelioma [Global]                       | Male   | 15-19 years | 95+ years | 0.241276            | 0.464505 | 0.185143 | 0.181593  | 0.999543    | 0.989174     |
| Mesothelioma [Global]                       | Female | 15-19 years | 95+ years | 0.260519            | 0.427073 | 0.202264 | 0.205672  | 0.998568    | 0.995729     |
| Hodgkin lymphoma [Data Rich]                | Male   | 0-6 days    | 95+ years | 0.350903            | 0.46589  | 0.27357  | 0.318263  | 0.99713     | 0.947085     |
| Hodgkin lymphoma [Data Rich]                | Female | 0-6 days    | 95+ years | 0.446449            | 0.618172 | 0.339263 | 0.421206  | 0.960309    | 0.961281     |
| Hodgkin lymphoma [Global]                   | Male   | 0-6 days    | 95+ years | 0.418144            | 0.544918 | 0.308703 | 0.308167  | 0.998369    | 0.99283      |
| Hodgkin lymphoma [Global]                   | Female | 0-6 days    | 95+ years | 0.590103            | 0.786115 | 0.402028 | 0.406353  | 0.972256    | 0.963972     |
| Non-Hodgkin lymphoma [Data Rich]            | Male   | 0-6 days    | 95+ years | 0.257262            | 0.319446 | 0.198048 | 0.224728  | 0.998985    | 0.998708     |
| Non-Hodgkin lymphoma [Data Rich]            | Female | 0-6 days    | 95+ years | 0.267228            | 0.346181 | 0.210521 | 0.242819  | 0.998808    | 0.998423     |
| Non-Hodgkin lymphoma [Global]               | Male   | 0-6 days    | 95+ years | 0.294371            | 0.40601  | 0.217911 | 0.227594  | 0.998919    | 0.992808     |
| Non-Hodgkin lymphoma [Global]               | Female | 0-6 days    | 95+ years | 0.300954            | 0.416656 | 0.228722 | 0.233181  | 0.998752    | 0.993317     |
| Multiple myeloma [Data Rich]                | Male   | 15-19 years | 95+ years | 0.229224            | 0.274483 | 0.181391 | 0.198275  | 0.999263    | 0.998586     |
| Multiple myeloma [Data Rich]                | Female | 15-19 years | 95+ years | 0.239102            | 0.290048 | 0.187379 | 0.216489  | 0.999277    | 0.998797     |
| Multiple myeloma [Global]                   | Male   | 15-19 years | 95+ years | 0.273879            | 0.3742   | 0.206672 | 0.211225  | 0.999194    | 0.994302     |
| Multiple myeloma [Global]                   | Female | 15-19 years | 95+ years | 0.277053            | 0.38199  | 0.206454 | 0.209223  | 0.999174    | 0.996651     |
| Leukemia [Data Rich]                        | Female | 0-6 days    | 95+ years | 0.232168            | 0.285674 | 0.190505 | 0.222964  | 0.997925    | 0.996086     |
| Leukemia [Data Rich]                        | Male   | 0-6 days    | 95+ years | 0.218797            | 0.271475 | 0.178922 | 0.207808  | 0.998391    | 0.99703      |
| Leukemia [Global]                           | Female | 0-6 days    | 95+ years | 0.283536            | 0.361995 | 0.242014 | 0.242573  | 0.99865     | 0.993203     |
| Leukemia [Global]                           | Male   | 0-6 days    | 95+ years | 0.294539            | 0.379    | 0.275613 | 0.270439  | 0.997571    | 0.992988     |
| Other neoplasms [Data Rich]                 | Male   | 0-6 days    | 95+ years | 0.256396            | 0.315719 | 0.217052 | 0.239815  | 0.993394    | 0.988905     |
| Other neoplasms [Data Rich]                 | Female | 0-6 days    | 95+ years | 0.266244            | 0.330966 | 0.224429 | 0.255028  | 0.993927    | 0.989754     |
| Other neoplasms [Global]                    | Female | 0-6 days    | 95+ years | 0.287964            | 0.370172 | 0.237436 | 0.240632  | 0.995797    | 0.992799     |
| Other neoplasms [Global]                    | Male   | 0-6 days    | 95+ years | 0.277797            | 0.363343 | 0.227826 | 0.234498  | 0.995245    | 0.992186     |
| Cardiovascular diseases [Data Rich]         | Female | 0-6 days    | 95+ years | 0.192262            | 0.238497 | 0.150738 | 0.173122  | 0.999286    | 0.998329     |
| Cardiovascular diseases [Data Rich]         | Male   | 0-6 days    | 95+ years | 0.131495            | 0.168958 | 0.09984  | 0.120649  | 0.999795    | 0.999232     |
| Cardiovascular diseases [Global]            | Male   | 0-6 days    | 95+ years | 0.163566            | 0.260481 | 0.122215 | 0.124031  | 0.999285    | 0.98696      |
| Cardiovascular diseases [Global]            | Female | 0-6 days    | 95+ years | 0.214127            | 0.304249 | 0.162144 | 0.165641  | 0.998835    | 0.988171     |
| Rheumatic heart disease [Data Rich]         | Male   | 1-4 years   | 95+ years | 0.152516            | 0.209445 | 0.109275 | 0.12886   | 0.999808    | 0.999469     |
| Rheumatic heart disease [Data Rich]         | Female | 1-4 years   | 95+ years | 0.163047            | 0.226524 | 0.121144 | 0.14047   | 0.999571    | 0.99907      |
| Rheumatic heart disease [Global]            | Female | 1-4 years   | 95+ years | 0.204952            | 0.414423 | 0.149091 | 0.152743  | 0.999276    | 0.987263     |
| Rheumatic heart disease [Global]            | Male   | 1-4 years   | 95+ years | 0.197282            | 0.396283 | 0.1435   | 0.147303  | 0.999326    | 0.984977     |
| Ischemic heart disease [Data Rich]          | Male   | 28-364 days | 95+ years | 0.165865            | 0.239331 | 0.118904 | 0.150065  | 0.998745    | 0.998481     |
| Ischemic heart disease [Data Rich]          | Female | 28-364 days | 95+ years | 0.169733            | 0.252884 | 0.121072 | 0.15727   | 0.996695    | 0.996303     |
| Ischemic heart disease [Global]             | Male   | 28-364 days | 95+ years | 0.21286             | 0.387879 | 0.162392 | 0.171877  | 0.998807    | 0.997858     |
| Ischemic heart disease [Global]             | Female | 28-364 days | 95+ years | 0.211418            | 0.421587 | 0.155088 | 0.161408  | 0.997979    | 0.977638     |
| Cerebrovascular disease [Data Rich]         | Male   | 0-6 days    | 95+ years | 0.184441            | 0.24818  | 0.138406 | 0.184836  | 0.999384    | 0.999074     |
| Cerebrovascular disease [Data Rich]         | Female | 0-6 days    | 95+ years | 0.160676            | 0.205385 | 0.121533 | 0.14436   | 0.999828    | 0.999483     |
| Cerebrovascular disease [Global]            | Male   | 0-6 days    | 95+ years | 0.216271            | 0.347364 | 0.157729 | 0.163709  | 0.999062    | 0.989017     |
| Cerebrovascular disease [Global]            | Female | 0-6 days    | 95+ years | 0.197338            | 0.333525 | 0.142096 | 0.149473  | 0.999346    | 0.989472     |
| Ischemic stroke [Data Rich]                 | Male   | 28-364 days | 95+ years | 0.177626            | 0.244707 | 0.136694 | 0.160955  | 0.999549    | 0.999322     |
| Ischemic stroke [Data Rich]                 | Female | 28-364 days | 95+ years | 0.157877            | 0.22556  | 0.119754 | 0.147035  | 0.999776    | 0.9996       |
| Ischemic stroke [Global]                    | Male   | 28-364 days | 95+ years | 0.204502            | 0.34158  | 0.150227 | 0.156071  | 0.999351    | 0.98046      |
| Ischemic stroke [Global]                    | Female | 28-364 days | 95+ years | 0.18313             | 0.32224  | 0.131296 | 0.137648  | 0.999679    | 0.984224     |
| Hemorrhagic stroke [Data Rich]              | Male   | 0-6 days    | 95+ years | 0.175211            | 0.247264 | 0.131987 | 0.171769  | 0.999348    | 0.998892     |
| Hemorrhagic stroke [Data Rich]              | Female | 0-6 days    | 95+ years | 0.154144            | 0.205856 | 0.11795  | 0.139364  | 0.999767    | 0.999408     |
| Hemorrhagic stroke [Global]                 | Male   | 0-6 days    | 95+ years | 0.207524            | 0.338293 | 0.153924 | 0.156106  | 0.998913    | 0.984318     |
| Hemorrhagic stroke [Global]                 | Female | 0-6 days    | 95+ years | 0.187471            | 0.314977 | 0.141525 | 0.144897  | 0.99938     | 0.986289     |
| Hypertensive heart disease [Data Rich]      | Male   | 28-364 days | 95+ years | 0.375853            | 0.515546 | 0.121205 | 0.131312  | 0.941321    | 0.944951     |
| Hypertensive heart disease [Data Rich]      | Female | 28-364 days | 95+ years | 0.378198            | 0.513771 | 0.114166 | 0.128987  | 0.948335    | 0.954071     |
| Hypertensive heart disease [Global]         | Male   | 28-364 days | 95+ years | 0.336247            | 0.665951 | 0.16303  | 0.173066  | 0.955092    | 0.920006     |
| Hypertensive heart disease [Global]         | Female | 28-364 days | 95+ years | 0.367106            | 0.612234 | 0.168515 | 0.17818   | 0.957197    | 0.924734     |
| Cardiomyopathy and myocarditis [Data Rich]  | Male   | 0-6 days    | 95+ years | 0.220269            | 0.306222 | 0.137843 | 0.169414  | 0.999808    | 0.999501     |
| Cardiomyopathy and myocarditis [Data Rich]  | Female | 0-6 days    | 95+ years | 0.29012             | 0.386485 | 0.185449 | 0.210994  | 0.998975    | 0.998244     |
| Cardiomyopathy and myocarditis [Global]     | Male   | 0-6 days    | 95+ years | 0.266398            | 0.452529 | 0.165167 | 0.169165  | 0.999422    | 0.981828     |
| Cardiomyopathy and myocarditis [Global]     | Female | 0-6 days    | 95+ years | 0.31616             | 0.532369 | 0.209694 | 0.213072  | 0.998865    | 0.983376     |
| Aortic aneurysm [Data Rich]                 | Male   | 15-19 years | 95+ years | 0.153024            | 0.242023 | 0.118267 | 0.130831  | 0.999821    | 0.999626     |
| Aortic aneurysm [Data Rich]                 | Female | 15-19 years | 95+ years | 0.164886            | 0.24291  | 0.127439 | 0.136764  | 0.99982     | 0.999588     |
| Aortic aneurysm [Global]                    | Male   | 15-19 years | 95+ years | 0.179833            | 0.326754 | 0.134775 | 0.136077  | 0.999841    | 0.990644     |
| Aortic aneurysm [Global]                    | Female | 15-19 years | 95+ years | 0.20074             | 0.361639 | 0.150479 | 0.149563  | 0.999756    | 0.993171     |
| Peripheral artery disease [Data Rich]       | Male   | 40-44 years | 95+ years | 0.369178            | 0.661617 | 0.196514 | 0.240344  | 0.998799    | 0.997877     |
| Peripheral artery disease [Data Rich]       | Female | 40-44 years | 95+ years | 0.40606             | 0.671306 | 0.209077 | 0.249727  | 0.997914    | 0.997001     |
| Peripheral artery disease [Global]          | Male   | 40-44 years | 95+ years | 0.367119            | 0.706275 | 0.21604  | 0.225123  | 0.998154    | 0.980256     |

| Cause                                                           | Sex    | Age start   | Age end   | Predictive validity |          |          |           |             |              |
|-----------------------------------------------------------------|--------|-------------|-----------|---------------------|----------|----------|-----------|-------------|--------------|
|                                                                 |        |             |           | RMSE in             | RMSE out | Trend in | Trend out | Coverage in | Coverage out |
|                                                                 |        |             |           |                     |          |          |           |             |              |
| Peripheral artery disease [Global]                              | Female | 40-44 years | 95+ years | 0.375448            | 0.690754 | 0.232678 | 0.247308  | 0.996876    | 0.979057     |
| Endocarditis [Data Rich]                                        | Female | 0-6 days    | 95+ years | 0.306661            | 0.443574 | 0.147608 | 0.178623  | 0.999581    | 0.999381     |
| Endocarditis [Data Rich]                                        | Male   | 0-6 days    | 95+ years | 0.271783            | 0.419623 | 0.155299 | 0.175676  | 0.999884    | 0.999767     |
| Endocarditis [Global]                                           | Female | 0-6 days    | 95+ years | 0.254591            | 0.465498 | 0.162758 | 0.172122  | 0.999477    | 0.993651     |
| Endocarditis [Global]                                           | Male   | 0-6 days    | 95+ years | 0.341863            | 0.50083  | 0.173558 | 0.177394  | 0.999753    | 0.995051     |
| Other cardiovascular and circulatory diseases [Data Rich]       | Male   | 0-6 days    | 95+ years | 0.213776            | 0.281449 | 0.155893 | 0.179796  | 0.998382    | 0.997111     |
| Other cardiovascular and circulatory diseases [Data Rich]       | Female | 0-6 days    | 95+ years | 0.203074            | 0.266679 | 0.147133 | 0.164076  | 0.99867     | 0.997542     |
| Other cardiovascular and circulatory diseases [Global]          | Male   | 0-6 days    | 95+ years | 0.295104            | 0.443714 | 0.192381 | 0.200649  | 0.998318    | 0.986363     |
| Other cardiovascular and circulatory diseases [Global]          | Female | 0-6 days    | 95+ years | 0.285593            | 0.459561 | 0.190186 | 0.19816   | 0.998704    | 0.986935     |
| Chronic respiratory diseases [Global]                           | Male   | 1-4 years   | 95+ years | 0.214738            | 0.363049 | 0.181231 | 0.18      | 0.998948    | 0.981183     |
| Chronic respiratory diseases [Data Rich]                        | Male   | 1-4 years   | 95+ years | 0.151269            | 0.196474 | 0.119361 | 0.139347  | 0.99982     | 0.999296     |
| Chronic respiratory diseases [Global]                           | Female | 1-4 years   | 95+ years | 0.213751            | 0.366215 | 0.148876 | 0.154955  | 0.999488    | 0.985731     |
| Chronic respiratory diseases [Data Rich]                        | Female | 1-4 years   | 95+ years | 0.157007            | 0.20946  | 0.12241  | 0.145705  | 0.999901    | 0.999331     |
| Chronic obstructive pulmonary disease [Data Rich]               | Male   | 1-4 years   | 95+ years | 0.154402            | 0.236138 | 0.122112 | 0.141295  | 0.9999      | 0.999401     |
| Chronic obstructive pulmonary disease [Global]                  | Male   | 1-4 years   | 95+ years | 0.185562            | 0.320172 | 0.140978 | 0.144131  | 0.999801    | 0.990405     |
| Chronic obstructive pulmonary disease [Data Rich]               | Female | 1-4 years   | 95+ years | 0.161715            | 0.277006 | 0.12516  | 0.139416  | 0.999949    | 0.999607     |
| Chronic obstructive pulmonary disease [Global]                  | Female | 1-4 years   | 95+ years | 0.196875            | 0.343943 | 0.141256 | 0.143174  | 0.99993     | 0.991945     |
| Pneumoconiosis [Global]                                         | Female | 1-4 years   | 95+ years | 0.374414            | 0.856432 | 0.275237 | 0.28672   | 0.998451    | 0.976312     |
| Pneumoconiosis [Data Rich]                                      | Female | 1-4 years   | 95+ years | 0.311531            | 0.598142 | 0.233498 | 0.276232  | 0.999204    | 0.997774     |
| Pneumoconiosis [Global]                                         | Male   | 1-4 years   | 95+ years | 0.270107            | 0.723686 | 0.19162  | 0.19355   | 0.999369    | 0.980403     |
| Pneumoconiosis [Data Rich]                                      | Male   | 1-4 years   | 95+ years | 0.215051            | 0.377244 | 0.156683 | 0.153744  | 0.999676    | 0.999072     |
| Silicosis [Global]                                              | Female | 1-4 years   | 95+ years | 0.733623            | 1.24629  | 0.551239 | 0.572099  | 0.982359    | 0.949326     |
| Silicosis [Data Rich]                                           | Female | 1-4 years   | 95+ years | 0.641745            | 0.95793  | 0.501452 | 0.565322  | 0.979636    | 0.974802     |
| Silicosis [Global]                                              | Male   | 1-4 years   | 95+ years | 0.464767            | 1.12932  | 0.330122 | 0.322285  | 0.983176    | 0.936495     |
| Silicosis [Data Rich]                                           | Male   | 1-4 years   | 95+ years | 0.38962             | 0.664319 | 0.283152 | 0.256956  | 0.983172    | 0.981028     |
| Asbestosis [Global]                                             | Female | 1-4 years   | 95+ years | 1.1665              | 1.85842  | 0.711671 | 0.749178  | 0.708166    | 0.667294     |
| Asbestosis [Data Rich]                                          | Female | 1-4 years   | 95+ years | 1.01215             | 1.43052  | 0.664919 | 0.763103  | 0.655933    | 0.65262      |
| Asbestosis [Global]                                             | Male   | 1-4 years   | 95+ years | 1.11945             | 1.49636  | 0.429074 | 0.433138  | 0.778045    | 0.771509     |
| Asbestosis [Data Rich]                                          | Male   | 1-4 years   | 95+ years | 0.691529            | 0.932549 | 0.349991 | 0.339131  | 0.753847    | 0.754577     |
| Coal workers pneumoconiosis [Data Rich]                         | Male   | 1-4 years   | 95+ years | 0.476701            | 0.692153 | 0.336023 | 0.287121  | 0.966318    | 0.962163     |
| Coal workers pneumoconiosis [Global]                            | Male   | 1-4 years   | 95+ years | 0.583664            | 1.44197  | 0.417538 | 0.401023  | 0.965902    | 0.919421     |
| Coal workers pneumoconiosis [Data Rich]                         | Female | 1-4 years   | 95+ years | 0.686195            | 1.07185  | 0.535712 | 0.65237   | 0.928186    | 0.921679     |
| Coal workers pneumoconiosis [Global]                            | Female | 1-4 years   | 95+ years | 0.81925             | 1.36011  | 0.615975 | 0.644494  | 0.941823    | 0.940531     |
| Other pneumoconiosis [Global]                                   | Male   | 1-4 years   | 95+ years | 0.312932            | 0.662782 | 0.211254 | 0.218186  | 0.921217    | 0.925185     |
| Other pneumoconiosis [Data Rich]                                | Male   | 1-4 years   | 95+ years | 0.248766            | 0.476134 | 0.169182 | 0.174756  | 0.999502    | 0.99887      |
| Other pneumoconiosis [Global]                                   | Female | 1-4 years   | 95+ years | 0.559101            | 1.05284  | 0.338025 | 0.357781  | 0.75868     | 0.746502     |
| Other pneumoconiosis [Data Rich]                                | Female | 1-4 years   | 95+ years | 0.414989            | 0.824373 | 0.290625 | 0.365377  | 0.997939    | 0.995488     |
| Asthma [Global]                                                 | Female | 1-4 years   | 95+ years | 0.233546            | 0.462602 | 0.164998 | 0.167501  | 0.999755    | 0.99175      |
| Asthma [Data Rich]                                              | Female | 1-4 years   | 95+ years | 0.197137            | 0.33993  | 0.143896 | 0.165311  | 0.999789    | 0.99967      |
| Asthma [Global]                                                 | Male   | 1-4 years   | 95+ years | 0.235747            | 0.494414 | 0.162522 | 0.164543  | 0.999806    | 0.988722     |
| Asthma [Data Rich]                                              | Male   | 1-4 years   | 95+ years | 0.211385            | 0.370967 | 0.144466 | 0.158342  | 0.999858    | 0.999804     |
| Interstitial lung disease and pulmonary sarcoidosis [Global]    | Female | 1-4 years   | 95+ years | 0.302765            | 0.511513 | 0.181156 | 0.187252  | 0.999355    | 0.991799     |
| Interstitial lung disease and pulmonary sarcoidosis [Data Rich] | Female | 1-4 years   | 95+ years | 0.25481             | 0.434681 | 0.161626 | 0.183933  | 0.999577    | 0.999425     |
| Interstitial lung disease and pulmonary sarcoidosis [Global]    | Male   | 1-4 years   | 95+ years | 0.307647            | 0.492826 | 0.175552 | 0.180107  | 0.999549    | 0.991899     |
| Interstitial lung disease and pulmonary sarcoidosis [Data Rich] | Male   | 1-4 years   | 95+ years | 0.269701            | 0.408546 | 0.162959 | 0.173591  | 0.99965     | 0.99946      |
| Other chronic respiratory diseases [Global]                     | Female | 1-4 years   | 95+ years | 0.477259            | 0.687179 | 0.289427 | 0.283232  | 0.99796     | 0.98908      |
| Other chronic respiratory diseases [Data Rich]                  | Female | 1-4 years   | 95+ years | 0.345243            | 0.468642 | 0.219455 | 0.234483  | 0.999172    | 0.998265     |
| Other chronic respiratory diseases [Global]                     | Male   | 1-4 years   | 95+ years | 0.405874            | 0.641769 | 0.241063 | 0.241372  | 0.999212    | 0.991323     |
| Other chronic respiratory diseases [Data Rich]                  | Male   | 1-4 years   | 95+ years | 0.35057             | 0.439912 | 0.188925 | 0.198379  | 0.999737    | 0.999245     |
| Cirrhosis and other chronic liver diseases [Data Rich]          | Male   | 1-4 years   | 95+ years | 0.179209            | 0.262346 | 0.134376 | 0.177788  | 0.999412    | 0.999075     |
| Cirrhosis and other chronic liver diseases [Data Rich]          | Female | 1-4 years   | 95+ years | 0.204421            | 0.304245 | 0.155018 | 0.221822  | 0.998591    | 0.99815      |
| Cirrhosis and other chronic liver diseases [Global]             | Female | 1-4 years   | 95+ years | 0.230628            | 0.422164 | 0.168036 | 0.173688  | 0.998633    | 0.983339     |
| Cirrhosis and other chronic liver diseases [Global]             | Male   | 1-4 years   | 95+ years | 0.216882            | 0.4316   | 0.14994  | 0.158475  | 0.999356    | 0.982177     |
| Digestive diseases [Global]                                     | Female | 0-6 days    | 95+ years | 0.270455            | 0.359254 | 0.259676 | 0.265122  | 0.999384    | 0.995712     |
| Digestive diseases [Data Rich]                                  | Female | 0-6 days    | 95+ years | 0.163941            | 0.210831 | 0.125319 | 0.149704  | 0.999776    | 0.999546     |
| Digestive diseases [Global]                                     | Male   | 0-6 days    | 95+ years | 0.267873            | 0.357645 | 0.252092 | 0.231238  | 0.999159    | 0.99466      |
| Digestive diseases [Data Rich]                                  | Male   | 0-6 days    | 95+ years | 0.178265            | 0.225295 | 0.130579 | 0.152707  | 0.999837    | 0.999605     |
| Peptic ulcer disease [Data Rich]                                | Female | 1-4 years   | 95+ years | 0.255805            | 0.394632 | 0.187573 | 0.288663  | 0.997477    | 0.996982     |
| Peptic ulcer disease [Data Rich]                                | Male   | 1-4 years   | 95+ years | 0.242307            | 0.369968 | 0.179312 | 0.270947  | 0.991071    | 0.991741     |
| Peptic ulcer disease [Global]                                   | Female | 1-4 years   | 95+ years | 0.284239            | 0.469943 | 0.198721 | 0.206417  | 0.998008    | 0.988173     |
| Peptic ulcer disease [Global]                                   | Male   | 1-4 years   | 95+ years | 0.269341            | 0.441943 | 0.188717 | 0.19908   | 0.992949    | 0.983866     |
| Gastritis and duodenitis [Data Rich]                            | Male   | 1-4 years   | 95+ years | 0.330813            | 0.676853 | 0.238248 | 0.292961  | 0.994144    | 0.992533     |
| Gastritis and duodenitis [Data Rich]                            | Female | 1-4 years   | 95+ years | 0.462701            | 0.875334 | 0.319025 | 0.42543   | 0.982053    | 0.978797     |
| Gastritis and duodenitis [Global]                               | Male   | 1-4 years   | 95+ years | 0.387565            | 0.788525 | 0.278512 | 0.288003  | 0.99535     | 0.974564     |
| Gastritis and duodenitis [Global]                               | Female | 1-4 years   | 95+ years | 0.5028              | 0.902224 | 0.352124 | 0.375143  | 0.987908    | 0.962366     |
| Appendicitis [Data Rich]                                        | Male   | 1-4 years   | 95+ years | 0.222178            | 0.291123 | 0.163131 | 0.19261   | 0.999855    | 0.999616     |
| Appendicitis [Data Rich]                                        | Female | 1-4 years   | 95+ years | 0.275251            | 0.350678 | 0.181891 | 0.214117  | 0.999793    | 0.999535     |
| Appendicitis [Global]                                           | Male   | 1-4 years   | 95+ years | 0.263703            | 0.442064 | 0.185635 | 0.188683  | 0.999691    | 0.994425     |
| Appendicitis [Global]                                           | Female | 1-4 years   | 95+ years | 0.286902            | 0.473703 | 0.201799 | 0.199287  | 0.999666    | 0.994854     |
| Paralytic ileus and intestinal obstruction [Data Rich]          | Male   | 0-6 days    | 95+ years | 0.270214            | 0.339601 | 0.159736 | 0.178805  | 0.999655    | 0.999233     |
| Paralytic ileus and intestinal obstruction [Data Rich]          | Female | 0-6 days    | 95+ years | 0.270521            | 0.345787 | 0.162546 | 0.183923  | 0.999687    | 0.999551     |
| Paralytic ileus and intestinal obstruction [Global]             | Male   | 0-6 days    | 95+ years | 0.279203            | 0.430488 | 0.172827 | 0.177438  | 0.999504    | 0.994849     |
| Paralytic ileus and intestinal obstruction [Global]             | Female | 0-6 days    | 95+ years | 0.281562            | 0.41762  | 0.173685 | 0.182219  | 0.999494    | 0.995381     |
| Inguinal, femoral, and abdominal hernia [Data Rich]             | Female | 1-4 years   | 95+ years | 0.383014            | 0.560535 | 0.256237 | 0.352187  | 0.999604    | 0.995472     |
| Inguinal, femoral, and abdominal hernia [Data Rich]             | Male   | 1-4 years   | 95+ years | 0.355087            | 0.524619 | 0.24561  | 0.337298  | 0.996855    | 0.996805     |
| Inguinal, femoral, and abdominal hernia [Global]                | Female | 1-4 years   | 95+ years | 0.536159            | 0.713911 | 0.278552 | 0.288185  | 0.955189    | 0.945162     |
| Inguinal, femoral, and abdominal hernia [Global]                | Male   | 1-4 years   | 95+ years | 0.446523            | 0.652866 | 0.259804 | 0.275091  | 0.971336    | 0.965397     |
| Inflammatory bowel disease [Data Rich]                          | Male   | 1-4 years   | 95+ years | 0.282424            | 0.459781 | 0.19247  | 0.239465  | 0.999144    | 0.998811     |
| Inflammatory bowel disease [Data Rich]                          | Female | 1-4 years   | 95+ years | 0.270773            | 0.445533 | 0.186982 | 0.225011  | 0.999074    | 0.998683     |
| Inflammatory bowel disease [Global]                             | Male   | 1-4 years   | 95+ years | 0.329204            | 0.513562 | 0.215507 | 0.223708  | 0.99899     | 0.99392      |
| Inflammatory bowel disease [Global]                             | Female | 1-4 years   | 95+ years | 0.318483            | 0.558503 | 0.216553 | 0.224204  | 0.998926    | 0.98921      |
| Vascular intestinal disorders [Data Rich]                       | Female | 1-4 years   | 95+ years | 0.316032            | 0.527497 | 0.238404 | 0.335475  | 0.99726     | 0.996937     |
| Vascular intestinal disorders [Data Rich]                       | Male   | 1-4 years   | 95+ years | 0.25634             | 0.388341 | 0.178126 | 0.231957  | 0.999089    | 0.999053     |
| Vascular intestinal disorders [Global]                          | Female | 1-4 years   | 95+ years | 0.355948            | 0.575886 | 0.251798 | 0.265648  | 0.997737    | 0.986443     |
| Vascular intestinal disorders [Global]                          | Male   | 1-4 years   | 95+ years | 0.289547            | 0.482381 | 0.192213 | 0.202417  | 0.999028    | 0.989822     |
| Gallbladder and biliary diseases [Data Rich]                    | Female | 1-4 years   | 95+ years | 0.283105            | 0.442693 | 0.207388 | 0.333082  | 0.998065    | 0.997484     |
| Gallbladder and biliary diseases [Data Rich]                    | Male   | 1-4 years   | 95+ years | 0.307799            | 0.457515 | 0.227021 | 0.344195  | 0.996702    | 0.995422     |
| Gallbladder and biliary diseases [Global]                       | Male   | 1-4 years   | 95+ years | 0.369789            | 0.532326 | 0.249481 | 0.261085  | 0.99601     | 0.988713     |
| Gallbladder and biliary diseases [Global]                       | Female | 1-4 years   | 95+ years | 0.350359            | 0.528094 | 0.233628 | 0.245633  | 0.99749     | 0.986886     |

| Cause                                             | Sex    | Age start   | Age end     | Predictive validity |          |           |           |             |              |
|---------------------------------------------------|--------|-------------|-------------|---------------------|----------|-----------|-----------|-------------|--------------|
|                                                   |        |             |             | RMSE in             | RMSE out | Trend in  | Trend out | Coverage in | Coverage out |
|                                                   |        |             |             |                     |          |           |           |             |              |
| Pancreatitis [Data Rich]                          | Female | 1-4 years   | 95+ years   | 0.352905            | 0.538338 | 0.255964  | 0.327749  | 0.996168    | 0.994666     |
| Pancreatitis [Data Rich]                          | Male   | 1-4 years   | 95+ years   | 0.289483            | 0.423679 | 0.193218  | 0.236442  | 0.998269    | 0.998093     |
| Pancreatitis [Global]                             | Female | 1-4 years   | 95+ years   | 0.417096            | 0.565887 | 0.272015  | 0.283672  | 0.996165    | 0.988841     |
| Pancreatitis [Global]                             | Male   | 1-4 years   | 95+ years   | 0.32127             | 0.480724 | 0.205372  | 0.211816  | 0.998284    | 0.989827     |
| Other digestive diseases [Global]                 | Male   | 1-4 years   | 95+ years   | 0.219971            | 0.348122 | 0.156307  | 0.159797  | 0.999581    | 0.997556     |
| Other digestive diseases [Global]                 | Female | 1-4 years   | 95+ years   | 0.22718             | 0.378123 | 0.160941  | 0.167021  | 0.999463    | 0.995181     |
| Other digestive diseases [Data Rich]              | Male   | 1-4 years   | 95+ years   | 0.200581            | 0.274113 | 0.13394   | 0.15551   | 0.999987    | 0.999901     |
| Other digestive diseases [Data Rich]              | Female | 1-4 years   | 95+ years   | 0.183726            | 0.292664 | 0.134883  | 0.159469  | 0.999997    | 0.999786     |
| Epilepsy [Data Rich]                              | Male   | 28-364 days | 95+ years   | 0.175607            | 0.233043 | 0.132644  | 0.158228  | 0.999936    | 0.999746     |
| Epilepsy [Data Rich]                              | Female | 28-364 days | 95+ years   | 0.193337            | 0.263355 | 0.147808  | 0.17834   | 0.999924    | 0.999846     |
| Epilepsy [Global]                                 | Male   | 28-364 days | 95+ years   | 0.210141            | 0.396411 | 0.154449  | 0.156602  | 0.999772    | 0.991091     |
| Epilepsy [Global]                                 | Female | 28-364 days | 95+ years   | 0.246304            | 0.411789 | 0.171275  | 0.178661  | 0.999766    | 0.995518     |
| Multiple sclerosis [Data Rich]                    | Female | 20-24 years | 95+ years   | 0.241721            | 0.323895 | 0.163912  | 0.179077  | 0.999726    | 0.999219     |
| Multiple sclerosis [Data Rich]                    | Male   | 20-24 years | 95+ years   | 0.234028            | 0.299417 | 0.160696  | 0.176833  | 0.999798    | 0.999523     |
| Multiple sclerosis [Global]                       | Female | 20-24 years | 95+ years   | 0.280482            | 0.454581 | 0.183879  | 0.184912  | 0.999277    | 0.994767     |
| Multiple sclerosis [Global]                       | Male   | 20-24 years | 95+ years   | 0.278237            | 0.450868 | 0.175818  | 0.179983  | 0.999577    | 0.995136     |
| Motor neuron disease [Data Rich]                  | Male   | 0-6 days    | 95+ years   | 0.316902            | 0.534013 | 0.211079  | 0.253568  | 0.99864     | 0.997388     |
| Motor neuron disease [Data Rich]                  | Female | 0-6 days    | 95+ years   | 0.293987            | 0.553224 | 0.20948   | 0.246723  | 0.998849    | 0.998185     |
| Motor neuron disease [Global]                     | Female | 0-6 days    | 95+ years   | 0.347205            | 0.658949 | 0.231288  | 0.23211   | 0.998472    | 0.989795     |
| Motor neuron disease [Global]                     | Male   | 0-6 days    | 95+ years   | 0.356241            | 0.611361 | 0.228359  | 0.234157  | 0.998503    | 0.989532     |
| Other neurological disorders [Data Rich]          | Male   | 28-364 days | 95+ years   | 0.191645            | 0.299067 | 0.143077  | 0.15757   | 0.999964    | 0.999748     |
| Other neurological disorders [Data Rich]          | Female | 28-364 days | 95+ years   | 0.197697            | 0.293511 | 0.152053  | 0.165734  | 0.999838    | 0.999649     |
| Other neurological disorders [Global]             | Male   | 28-364 days | 95+ years   | 0.225943            | 0.372312 | 0.163735  | 0.169604  | 0.999668    | 0.997502     |
| Other neurological disorders [Global]             | Female | 28-364 days | 95+ years   | 0.236573            | 0.36677  | 0.177541  | 0.174769  | 0.999484    | 0.997309     |
| Schizophrenia [Global]                            | Male   | 25-29 years | 95+ years   | 0.407179            | 0.818692 | 0.272956  | 0.292129  | 0.998606    | 0.982159     |
| Schizophrenia [Global]                            | Female | 25-29 years | 95+ years   | 0.399354            | 0.777819 | 0.284951  | 0.29287   | 0.998241    | 0.977864     |
| Schizophrenia [Data Rich]                         | Male   | 25-29 years | 95+ years   | 0.319514            | 0.536367 | 0.224978  | 0.320717  | 0.999539    | 0.99884      |
| Schizophrenia [Data Rich]                         | Female | 25-29 years | 95+ years   | 0.313456            | 0.5209   | 0.224708  | 0.29294   | 0.999345    | 0.993188     |
| Alcohol use disorders [Data Rich]                 | Male   | 15-19 years | 95+ years   | 0.17929             | 0.304548 | 0.130117  | 0.151662  | 0.999536    | 0.998886     |
| Alcohol use disorders [Data Rich]                 | Female | 15-19 years | 95+ years   | 0.203259            | 0.347821 | 0.151562  | 0.170722  | 0.999545    | 0.999214     |
| Alcohol use disorders [Global]                    | Male   | 15-19 years | 95+ years   | 0.269213            | 0.544551 | 0.157835  | 0.162962  | 0.999564    | 0.981681     |
| Alcohol use disorders [Global]                    | Female | 15-19 years | 95+ years   | 0.255953            | 0.611777 | 0.181912  | 0.186394  | 0.99926     | 0.979885     |
| Drug use disorders [Data Rich]                    | Male   | 15-19 years | 95+ years   | 0.247873            | 0.439854 | 0.171793  | 0.215707  | 0.999431    | 0.99837      |
| Drug use disorders [Data Rich]                    | Female | 15-19 years | 95+ years   | 0.236468            | 0.3908   | 0.171429  | 0.202846  | 0.999614    | 0.999074     |
| Drug use disorders [Data Rich]                    | Male   | 0-6 days    | 7-27 days   | 0.122912            | 0.197423 | 0.0592236 | 0.0817335 | 1           | 0.99992      |
| Drug use disorders [Data Rich]                    | Female | 0-6 days    | 7-27 days   | 0.175547            | 0.362237 | 0.0540063 | 0.0695225 | 1           | 0.999987     |
| Drug use disorders [Global]                       | Male   | 15-19 years | 95+ years   | 0.348551            | 0.692177 | 0.202837  | 0.217289  | 0.999215    | 0.974714     |
| Drug use disorders [Global]                       | Female | 15-19 years | 95+ years   | 0.314591            | 0.630735 | 0.204251  | 0.219663  | 0.999483    | 0.986834     |
| Drug use disorders [Global]                       | Male   | 0-6 days    | 7-27 days   | 0.252102            | 0.373197 | 0.155948  | 0.131023  | 0.998833    | 0.996251     |
| Drug use disorders [Global]                       | Female | 0-6 days    | 7-27 days   | 0.27611             | 0.478993 | 0.129182  | 0.0617594 | 0.998962    | 0.998016     |
| Opioid use disorders [Data Rich]                  | Male   | 15-19 years | 95+ years   | 0.279015            | 0.658101 | 0.156333  | 0.209697  | 0.999874    | 0.999659     |
| Opioid use disorders [Data Rich]                  | Female | 15-19 years | 95+ years   | 0.296893            | 0.575847 | 0.17329   | 0.210736  | 0.999956    | 0.999832     |
| Opioid use disorders [Data Rich]                  | Male   | 0-6 days    | 7-27 days   | 0.292308            | 0.783713 | 0.144181  | 0.21418   | 1           | 0.999765     |
| Opioid use disorders [Data Rich]                  | Female | 0-6 days    | 7-27 days   | 0.186804            | 0.499195 | 0.0555796 | 0.0798256 | 1           | 0.999986     |
| Opioid use disorders [Global]                     | Male   | 15-19 years | 95+ years   | 0.362253            | 0.781112 | 0.184474  | 0.198405  | 0.999429    | 0.981013     |
| Opioid use disorders [Global]                     | Female | 15-19 years | 95+ years   | 0.395472            | 0.731917 | 0.201174  | 0.212926  | 0.999812    | 0.991786     |
| Opioid use disorders [Global]                     | Male   | 0-6 days    | 7-27 days   | 0.319164            | 0.760471 | 0.167792  | 0.185988  | 0.999964    | 0.990763     |
| Opioid use disorders [Global]                     | Female | 0-6 days    | 7-27 days   | 0.208513            | 0.462801 | 0.0618939 | 0.0699246 | 1           | 0.999227     |
| Cocaine use disorders [Data Rich]                 | Male   | 15-19 years | 95+ years   | 0.500763            | 1.06769  | 0.375561  | 0.459082  | 0.994537    | 0.991288     |
| Cocaine use disorders [Data Rich]                 | Female | 15-19 years | 95+ years   | 0.499633            | 0.879049 | 0.375111  | 0.46816   | 0.995815    | 0.993677     |
| Cocaine use disorders [Global]                    | Male   | 15-19 years | 95+ years   | 0.666778            | 1.1883   | 0.390092  | 0.423225  | 0.994992    | 0.950469     |
| Cocaine use disorders [Global]                    | Female | 15-19 years | 95+ years   | 0.627812            | 1.0855   | 0.402242  | 0.435652  | 0.995377    | 0.969407     |
| Amphetamine use disorders [Data Rich]             | Male   | 15-19 years | 95+ years   | 0.569818            | 1.00642  | 0.441065  | 0.552117  | 0.99071     | 0.985854     |
| Amphetamine use disorders [Data Rich]             | Female | 15-19 years | 95+ years   | 0.48318             | 0.859142 | 0.349707  | 0.411377  | 0.995519    | 0.993432     |
| Amphetamine use disorders [Global]                | Male   | 15-19 years | 95+ years   | 0.7498              | 1.33032  | 0.454585  | 0.466483  | 0.991593    | 0.939045     |
| Amphetamine use disorders [Global]                | Female | 15-19 years | 95+ years   | 0.57807             | 1.05534  | 0.371049  | 0.38526   | 0.995634    | 0.966477     |
| Other drug use disorders [Data Rich]              | Male   | 15-19 years | 95+ years   | 0.302313            | 0.671706 | 0.206537  | 0.280499  | 0.999343    | 0.998393     |
| Other drug use disorders [Data Rich]              | Female | 15-19 years | 95+ years   | 0.305278            | 0.627427 | 0.211411  | 0.272263  | 0.999727    | 0.99923      |
| Other drug use disorders [Global]                 | Male   | 15-19 years | 95+ years   | 0.414794            | 0.878074 | 0.234226  | 0.256882  | 0.999026    | 0.97341      |
| Other drug use disorders [Global]                 | Female | 15-19 years | 95+ years   | 0.439288            | 0.781377 | 0.239331  | 0.251182  | 0.999491    | 0.983455     |
| Eating disorders [Data Rich]                      | Male   | 5-9 years   | 45-49 years | 0.508235            | 0.835798 | 0.409724  | 0.462264  | 0.992722    | 0.984897     |
| Eating disorders [Data Rich]                      | Female | 5-9 years   | 45-49 years | 0.535142            | 0.846057 | 0.431419  | 0.453248  | 0.9922      | 0.98541      |
| Eating disorders [Global]                         | Male   | 5-9 years   | 45-49 years | 0.572931            | 1.01616  | 0.453483  | 0.461891  | 0.9932      | 0.96358      |
| Eating disorders [Global]                         | Female | 5-9 years   | 45-49 years | 0.681655            | 1.23087  | 0.514815  | 0.525792  | 0.993354    | 0.95878      |
| Anorexia nervosa [Data Rich]                      | Male   | 5-9 years   | 45-49 years | 0.524883            | 0.878268 | 0.419212  | 0.508777  | 0.992536    | 0.984427     |
| Anorexia nervosa [Data Rich]                      | Female | 5-9 years   | 45-49 years | 0.554614            | 0.864159 | 0.437744  | 0.467461  | 0.992817    | 0.985946     |
| Anorexia nervosa [Global]                         | Male   | 5-9 years   | 45-49 years | 0.6378              | 1.0624   | 0.468241  | 0.465125  | 0.993775    | 0.96001      |
| Anorexia nervosa [Global]                         | Female | 5-9 years   | 45-49 years | 0.675183            | 1.23176  | 0.517061  | 0.525529  | 0.993283    | 0.951051     |
| Bulimia nervosa [Data Rich]                       | Male   | 5-9 years   | 45-49 years | 0.76311             | 1.0535   | 0.638808  | 0.602952  | 0.970107    | 0.957693     |
| Bulimia nervosa [Data Rich]                       | Female | 5-9 years   | 45-49 years | 0.943347            | 1.56089  | 0.795534  | 0.815436  | 0.956266    | 0.934965     |
| Bulimia nervosa [Global]                          | Male   | 5-9 years   | 45-49 years | 0.885898            | 1.24254  | 0.734903  | 0.71786   | 0.733219    | 0.701785     |
| Bulimia nervosa [Global]                          | Female | 5-9 years   | 45-49 years | 1.05396             | 1.78616  | 0.894882  | 0.907138  | 0.727466    | 0.663275     |
| Diabetes mellitus [Global]                        | Female | 0-6 days    | 20-24 years | 0.242454            | 0.480836 | 0.139685  | 0.142978  | 0.999675    | 0.996435     |
| Diabetes mellitus [Global]                        | Male   | 0-6 days    | 20-24 years | 0.329888            | 0.502708 | 0.232143  | 0.242337  | 0.99727     | 0.994199     |
| Diabetes mellitus [Data Rich]                     | Female | 0-6 days    | 20-24 years | 0.193579            | 0.283924 | 0.117672  | 0.146056  | 0.99999     | 0.999931     |
| Diabetes mellitus [Data Rich]                     | Male   | 0-6 days    | 20-24 years | 0.301135            | 0.410406 | 0.224001  | 0.301424  | 0.997173    | 0.99657      |
| Diabetes mellitus [Data Rich]                     | Male   | 25-29 years | 95+ years   | 0.166848            | 0.213468 | 0.126697  | 0.146121  | 0.999758    | 0.999137     |
| Diabetes mellitus [Data Rich]                     | Female | 25-29 years | 95+ years   | 0.176545            | 0.231843 | 0.132234  | 0.155994  | 0.999681    | 0.998812     |
| Diabetes mellitus [Global]                        | Male   | 25-29 years | 95+ years   | 0.195934            | 0.340288 | 0.14455   | 0.150474  | 0.999624    | 0.985024     |
| Diabetes mellitus [Global]                        | Female | 25-29 years | 95+ years   | 0.207287            | 0.356249 | 0.151212  | 0.157425  | 0.999492    | 0.984314     |
| Acute glomerulonephritis [Data Rich]              | Female | 28-364 days | 95+ years   | 0.792455            | 1.28781  | 0.61919   | 0.819368  | 0.803237    | 0.798877     |
| Acute glomerulonephritis [Data Rich]              | Male   | 28-364 days | 95+ years   | 0.723751            | 1.18477  | 0.54651   | 0.677276  | 0.829223    | 0.824467     |
| Acute glomerulonephritis [Global]                 | Female | 28-364 days | 95+ years   | 0.84856             | 1.65301  | 0.642553  | 0.686654  | 0.829502    | 0.808659     |
| Acute glomerulonephritis [Global]                 | Male   | 28-364 days | 95+ years   | 0.782474            | 1.68243  | 0.573639  | 0.596198  | 0.848428    | 0.806596     |
| Chronic kidney disease [Data Rich]                | Female | 28-364 days | 95+ years   | 0.185228            | 0.246711 | 0.136501  | 0.163456  | 0.999554    | 0.99884      |
| Chronic kidney disease [Data Rich]                | Male   | 28-364 days | 95+ years   | 0.17932             | 0.232099 | 0.136321  | 0.156455  | 0.999858    | 0.999312     |
| Chronic kidney disease [Global]                   | Female | 28-364 days | 95+ years   | 0.219249            | 0.373522 | 0.153203  | 0.159798  | 0.999262    | 0.98255      |
| Chronic kidney disease [Global]                   | Male   | 28-364 days | 95+ years   | 0.212661            | 0.345633 | 0.149419  | 0.153892  | 0.999595    | 0.986844     |
| Urinary diseases and male infertility [Data Rich] | Male   | 0-6 days    | 95+ years   | 0.250428            | 0.351144 | 0.177758  | 0.228228  | 0.998982    | 0.998195     |

| Cause                                                           | Sex    | Age start   | Age end     | Predictive validity                               |          |          |           |             |              |
|-----------------------------------------------------------------|--------|-------------|-------------|---------------------------------------------------|----------|----------|-----------|-------------|--------------|
|                                                                 |        |             |             | RMSE in                                           | RMSE out | Trend in | Trend out | Coverage in | Coverage out |
|                                                                 |        |             |             | Urinary diseases and male infertility [Data Rich] | Female   | 0-6 days | 95+ years | 0.222735    | 0.293697     |
| Urinary diseases and male infertility [Global]                  | Male   | 0-6 days    | 95+ years   | 0.28778                                           | 0.520065 | 0.19603  | 0.203661  | 0.998814    | 0.987936     |
| Urinary diseases and male infertility [Global]                  | Female | 0-6 days    | 95+ years   | 0.268818                                          | 0.505346 | 0.177372 | 0.183334  | 0.998919    | 0.988395     |
| Interstitial nephritis and urinary tract infections [Data Rich] | Female | 0-6 days    | 95+ years   | 0.326256                                          | 0.386483 | 0.171078 | 0.194525  | 0.999355    | 0.998778     |
| Interstitial nephritis and urinary tract infections [Data Rich] | Male   | 0-6 days    | 95+ years   | 0.357067                                          | 0.443525 | 0.18872  | 0.242126  | 0.998863    | 0.998294     |
| Interstitial nephritis and urinary tract infections [Global]    | Female | 0-6 days    | 95+ years   | 0.374528                                          | 0.548774 | 0.187308 | 0.192103  | 0.999374    | 0.988412     |
| Interstitial nephritis and urinary tract infections [Global]    | Male   | 0-6 days    | 95+ years   | 0.40746                                           | 0.622427 | 0.207561 | 0.215229  | 0.998957    | 0.986777     |
| Urolithiasis [Data Rich]                                        | Female | 5-9 years   | 95+ years   | 0.619467                                          | 0.888695 | 0.371183 | 0.492202  | 0.918249    | 0.922618     |
| Urolithiasis [Global]                                           | Male   | 5-9 years   | 95+ years   | 0.604745                                          | 1.05492  | 0.37646  | 0.397448  | 0.936221    | 0.91731      |
| Urolithiasis [Global]                                           | Female | 5-9 years   | 95+ years   | 0.633857                                          | 1.10156  | 0.395251 | 0.418754  | 0.928722    | 0.906192     |
| Urolithiasis [Data Rich]                                        | Male   | 5-9 years   | 95+ years   | 0.440095                                          | 0.725416 | 0.335799 | 0.457612  | 0.929454    | 0.930176     |
| Other urinary diseases [Data Rich]                              | Male   | 0-6 days    | 95+ years   | 0.331331                                          | 0.585632 | 0.219476 | 0.283436  | 0.976736    | 0.978299     |
| Other urinary diseases [Data Rich]                              | Female | 0-6 days    | 95+ years   | 0.510095                                          | 0.83564  | 0.273753 | 0.324016  | 0.978805    | 0.978816     |
| Other urinary diseases [Global]                                 | Female | 0-6 days    | 95+ years   | 0.623407                                          | 0.952645 | 0.35546  | 0.373652  | 0.979225    | 0.957914     |
| Other urinary diseases [Global]                                 | Male   | 0-6 days    | 95+ years   | 0.438613                                          | 0.715258 | 0.264672 | 0.277757  | 0.982053    | 0.97306      |
| Gynecological diseases [Data Rich]                              | Female | 15-19 years | 95+ years   | 0.389237                                          | 0.478005 | 0.290432 | 0.323182  | 0.996891    | 0.994365     |
| Gynecological diseases [Global]                                 | Female | 15-19 years | 95+ years   | 0.453469                                          | 0.800731 | 0.334038 | 0.336087  | 0.995176    | 0.970261     |
| Uterine fibroids [Data Rich]                                    | Female | 15-19 years | 95+ years   | 0.657055                                          | 0.999418 | 0.527788 | 0.514294  | 0.789723    | 0.788412     |
| Uterine fibroids [Global]                                       | Female | 15-19 years | 95+ years   | 0.749265                                          | 1.52289  | 0.58874  | 0.593656  | 0.932599    | 0.875057     |
| Polycystic ovarian syndrome [Data Rich]                         | Female | 15-19 years | 50-54 years | 0.369152                                          | 0.753118 | 0.268576 | 0.272653  | 0.997608    | 0.988782     |
| Polycystic ovarian syndrome [Global]                            | Female | 15-19 years | 50-54 years | 0.422703                                          | 0.775957 | 0.29793  | 0.304533  | 0.998345    | 0.993092     |
| Endometriosis [Data Rich]                                       | Female | 15-19 years | 50-54 years | 1.29095                                           | 1.85165  | 1.09805  | 1.18791   | 0.939392    | 0.873998     |
| Endometriosis [Global]                                          | Female | 15-19 years | 50-54 years | 1.42378                                           | 2.14531  | 1.21102  | 1.28172   | 0.980148    | 0.952155     |
| Genital prolapse [Data Rich]                                    | Female | 15-19 years | 95+ years   | 0.724768                                          | 1.12523  | 0.584496 | 0.629083  | 0.948294    | 0.94115      |
| Genital prolapse [Global]                                       | Female | 15-19 years | 95+ years   | 0.856787                                          | 1.55145  | 0.692829 | 0.660015  | 0.950204    | 0.910664     |
| Other gynecological diseases [Data Rich]                        | Female | 15-19 years | 95+ years   | 0.410418                                          | 0.569712 | 0.322516 | 0.32659   | 0.996204    | 0.992537     |
| Other gynecological diseases [Global]                           | Female | 15-19 years | 95+ years   | 0.517627                                          | 0.935619 | 0.376766 | 0.368315  | 0.994708    | 0.956519     |
| Hemoglobinopathies and hemolytic anemias [Data Rich]            | Male   | 0-6 days    | 5-9 years   | 0.236806                                          | 0.329948 | 0.1842   | 0.207962  | 0.99882     | 0.997989     |
| Hemoglobinopathies and hemolytic anemias [Data Rich]            | Female | 0-6 days    | 5-9 years   | 0.204503                                          | 0.288166 | 0.151575 | 0.155291  | 0.99944     | 0.999365     |
| Hemoglobinopathies and hemolytic anemias [Data Rich]            | Male   | 10-14 years | 95+ years   | 0.16513                                           | 0.244019 | 0.126773 | 0.1494    | 0.999958    | 0.999922     |
| Hemoglobinopathies and hemolytic anemias [Data Rich]            | Female | 10-14 years | 95+ years   | 0.209186                                          | 0.329281 | 0.127559 | 0.154175  | 0.999989    | 0.999953     |
| Hemoglobinopathies and hemolytic anemias [Global]               | Male   | 0-6 days    | 5-9 years   | 0.287723                                          | 0.457527 | 0.186143 | 0.186355  | 0.99949     | 0.995269     |
| Hemoglobinopathies and hemolytic anemias [Global]               | Female | 0-6 days    | 5-9 years   | 0.278753                                          | 0.453452 | 0.164557 | 0.172615  | 0.999798    | 0.99666      |
| Hemoglobinopathies and hemolytic anemias [Global]               | Male   | 10-14 years | 95+ years   | 0.26492                                           | 0.437046 | 0.165127 | 0.155548  | 0.999583    | 0.992692     |
| Hemoglobinopathies and hemolytic anemias [Global]               | Female | 10-14 years | 95+ years   | 0.236803                                          | 0.413363 | 0.157181 | 0.161496  | 0.999655    | 0.992728     |
| Endocrine, metabolic, blood, and immune disorders [Data Rich]   | Female | 0-6 days    | 95+ years   | 0.265866                                          | 0.331011 | 0.193388 | 0.211396  | 0.999638    | 0.998794     |
| Endocrine, metabolic, blood, and immune disorders [Data Rich]   | Male   | 0-6 days    | 95+ years   | 0.218761                                          | 0.280283 | 0.151892 | 0.173689  | 0.999625    | 0.999057     |
| Endocrine, metabolic, blood, and immune disorders [Global]      | Female | 0-6 days    | 95+ years   | 0.311592                                          | 0.493551 | 0.220735 | 0.222346  | 0.999352    | 0.989911     |
| Endocrine, metabolic, blood, and immune disorders [Global]      | Male   | 0-6 days    | 95+ years   | 0.288038                                          | 0.467568 | 0.189101 | 0.192024  | 0.999174    | 0.989914     |
| Musculoskeletal disorders [Data Rich]                           | Male   | 5-9 years   | 95+ years   | 0.202388                                          | 0.303974 | 0.150613 | 0.174564  | 0.999892    | 0.999696     |
| Musculoskeletal disorders [Data Rich]                           | Female | 5-9 years   | 95+ years   | 0.191089                                          | 0.320391 | 0.140109 | 0.160872  | 0.999756    | 0.999483     |
| Musculoskeletal disorders [Global]                              | Male   | 5-9 years   | 95+ years   | 0.24754                                           | 0.427225 | 0.171935 | 0.174746  | 0.999809    | 0.993792     |
| Musculoskeletal disorders [Global]                              | Female | 5-9 years   | 95+ years   | 0.24877                                           | 0.463854 | 0.162844 | 0.168315  | 0.999586    | 0.987188     |
| Rheumatoid arthritis [Data Rich]                                | Female | 5-9 years   | 95+ years   | 0.267372                                          | 0.461031 | 0.192862 | 0.255179  | 0.995251    | 0.994492     |
| Rheumatoid arthritis [Data Rich]                                | Male   | 5-9 years   | 95+ years   | 0.313475                                          | 0.524108 | 0.232578 | 0.303335  | 0.982688    | 0.982442     |
| Rheumatoid arthritis [Global]                                   | Male   | 5-9 years   | 95+ years   | 0.3743                                            | 0.74528  | 0.262444 | 0.277418  | 0.985151    | 0.970339     |
| Rheumatoid arthritis [Global]                                   | Female | 5-9 years   | 95+ years   | 0.325777                                          | 0.651975 | 0.222855 | 0.231085  | 0.994997    | 0.975822     |
| Other musculoskeletal disorders [Data Rich]                     | Male   | 5-9 years   | 95+ years   | 0.247842                                          | 0.359328 | 0.163094 | 0.18294   | 0.99991     | 0.999818     |
| Other musculoskeletal disorders [Data Rich]                     | Female | 5-9 years   | 95+ years   | 0.239884                                          | 0.419361 | 0.157167 | 0.181308  | 0.999799    | 0.99946      |
| Other musculoskeletal disorders [Global]                        | Male   | 5-9 years   | 95+ years   | 0.276621                                          | 0.477127 | 0.181974 | 0.186252  | 0.999824    | 0.996815     |
| Other musculoskeletal disorders [Global]                        | Female | 5-9 years   | 95+ years   | 0.297846                                          | 0.544271 | 0.179636 | 0.182208  | 0.999612    | 0.990339     |
| Congenital birth defects [Data Rich]                            | Male   | 0-6 days    | 65-69 years | 0.187728                                          | 0.307926 | 0.130594 | 0.142968  | 0.999768    | 0.999494     |
| Congenital birth defects [Data Rich]                            | Female | 0-6 days    | 65-69 years | 0.202998                                          | 0.317523 | 0.149479 | 0.154752  | 0.999295    | 0.999153     |
| Congenital birth defects [Global]                               | Male   | 0-6 days    | 65-69 years | 0.213557                                          | 0.366744 | 0.14413  | 0.145106  | 0.999656    | 0.994776     |
| Congenital birth defects [Global]                               | Female | 0-6 days    | 65-69 years | 0.222667                                          | 0.386215 | 0.16262  | 0.169763  | 0.999273    | 0.99608      |
| Neural tube defects [Data Rich]                                 | Male   | 0-6 days    | 65-69 years | 0.511074                                          | 0.684196 | 0.410569 | 0.436517  | 0.991879    | 0.98864      |
| Neural tube defects [Data Rich]                                 | Female | 0-6 days    | 65-69 years | 0.562295                                          | 0.769694 | 0.450508 | 0.476537  | 0.844016    | 0.833556     |
| Neural tube defects [Global]                                    | Male   | 0-6 days    | 65-69 years | 0.614659                                          | 1.27809  | 0.487802 | 0.499774  | 0.894512    | 0.870196     |
| Neural tube defects [Global]                                    | Female | 0-6 days    | 65-69 years | 0.664811                                          | 1.30712  | 0.547394 | 0.527378  | 0.860297    | 0.84598      |
| Congenital heart anomalies [Data Rich]                          | Male   | 0-6 days    | 65-69 years | 0.253161                                          | 0.344211 | 0.14564  | 0.160504  | 0.999748    | 0.999547     |
| Congenital heart anomalies [Data Rich]                          | Female | 0-6 days    | 65-69 years | 0.263302                                          | 0.350342 | 0.17974  | 0.183229  | 0.998945    | 0.998806     |
| Congenital heart anomalies [Global]                             | Male   | 0-6 days    | 65-69 years | 0.264809                                          | 0.450742 | 0.161561 | 0.164973  | 0.999714    | 0.99575      |
| Congenital heart anomalies [Global]                             | Female | 0-6 days    | 65-69 years | 0.278649                                          | 0.521451 | 0.200541 | 0.205942  | 0.999056    | 0.996225     |
| Orofacial clefts [Data Rich]                                    | Male   | 0-6 days    | 1-4 years   | 1.01661                                           | 1.45521  | 0.748075 | 0.806207  | 0.985239    | 0.941838     |
| Orofacial clefts [Global]                                       | Male   | 0-6 days    | 1-4 years   | 1.03288                                           | 1.59048  | 0.799884 | 0.829625  | 0.986131    | 0.975288     |
| Orofacial clefts [Data Rich]                                    | Female | 0-6 days    | 1-4 years   | 0.976068                                          | 1.38873  | 0.739238 | 0.798592  | 0.981561    | 0.936877     |
| Orofacial clefts [Global]                                       | Female | 0-6 days    | 1-4 years   | 1.08986                                           | 1.63418  | 0.862421 | 0.867461  | 0.9067      | 0.88513      |
| Down syndrome [Data Rich]                                       | Male   | 0-6 days    | 65-69 years | 0.369496                                          | 0.591935 | 0.234815 | 0.246582  | 0.998316    | 0.997758     |
| Down syndrome [Data Rich]                                       | Female | 0-6 days    | 65-69 years | 0.428531                                          | 0.652201 | 0.285806 | 0.293699  | 0.996402    | 0.995455     |
| Down syndrome [Global]                                          | Male   | 0-6 days    | 65-69 years | 0.408147                                          | 0.655466 | 0.248661 | 0.251603  | 0.998333    | 0.990867     |
| Down syndrome [Global]                                          | Female | 0-6 days    | 65-69 years | 0.445675                                          | 0.744969 | 0.294358 | 0.302952  | 0.996369    | 0.98883      |
| Other chromosomal abnormalities [Data Rich]                     | Male   | 0-6 days    | 65-69 years | 0.76776                                           | 1.16236  | 0.524335 | 0.543793  | 0.989423    | 0.986424     |
| Other chromosomal abnormalities [Data Rich]                     | Female | 0-6 days    | 65-69 years | 0.617539                                          | 1.0535   | 0.454229 | 0.517257  | 0.984023    | 0.97961      |
| Other chromosomal abnormalities [Global]                        | Male   | 0-6 days    | 65-69 years | 0.857035                                          | 1.88052  | 0.561501 | 0.549064  | 0.989145    | 0.87986      |
| Other chromosomal abnormalities [Global]                        | Female | 0-6 days    | 65-69 years | 0.690025                                          | 1.89563  | 0.513512 | 0.535652  | 0.982535    | 0.848516     |
| Congenital musculoskeletal and limb anomalies [Data Rich]       | Male   | 0-6 days    | 65-69 years | 0.399572                                          | 0.555865 | 0.297401 | 0.290005  | 0.996788    | 0.995107     |
| Congenital musculoskeletal and limb anomalies [Data Rich]       | Female | 0-6 days    | 65-69 years | 0.444637                                          | 0.607148 | 0.318311 | 0.320391  | 0.996207    | 0.993821     |
| Congenital musculoskeletal and limb anomalies [Global]          | Male   | 0-6 days    | 65-69 years | 0.444923                                          | 1.09036  | 0.329353 | 0.341175  | 0.996363    | 0.95561      |
| Congenital musculoskeletal and limb anomalies [Global]          | Female | 0-6 days    | 65-69 years | 0.482248                                          | 1.10349  | 0.355963 | 0.358807  | 0.995572    | 0.948531     |
| Urogenital congenital anomalies [Data Rich]                     | Male   | 0-6 days    | 65-69 years | 0.498322                                          | 0.695814 | 0.239192 | 0.197908  | 0.958274    | 0.945843     |
| Urogenital congenital anomalies [Data Rich]                     | Female | 0-6 days    | 65-69 years | 0.499657                                          | 0.624048 | 0.308999 | 0.263407  | 0.91315     | 0.930308     |
| Urogenital congenital anomalies [Global]                        | Female | 0-6 days    | 65-69 years | 0.484296                                          | 0.731713 | 0.319216 | 0.305618  | 0.932251    | 0.921341     |
| Urogenital congenital anomalies [Global]                        | Male   | 0-6 days    | 65-69 years | 0.396764                                          | 0.729879 | 0.255343 | 0.251628  | 0.96717     | 0.952729     |
| Digestive congenital anomalies [Data Rich]                      | Female | 0-6 days    | 65-69 years | 0.389235                                          | 0.555576 | 0.294019 | 0.309746  | 0.8883      | 0.883438     |
| Digestive congenital anomalies [Data Rich]                      | Male   | 0-6 days    | 65-69 years | 0.430175                                          | 0.556295 | 0.272384 | 0.282597  | 0.913896    | 0.909876     |
| Digestive congenital anomalies [Global]                         | Male   | 0-6 days    | 65-69 years | 0.438261                                          | 1.15703  | 0.311106 | 0.32333   | 0.996643    | 0.93733      |
| Digestive congenital anomalies [Global]                         | Female | 0-6 days    | 65-69 years | 0.467432                                          | 1.08748  | 0.348916 | 0.349403  | 0.995626    | 0.948371     |
| Other congenital birth defects [Data Rich]                      | Female | 0-6 days    | 65-69 years | 0.294219                                          | 0.393813 | 0.206031 | 0.22779   | 0.997847    | 0.997521     |
| Other congenital birth defects [Data Rich]                      | Male   | 0-6 days    | 65-69 years | 0.269838                                          | 0.376572 | 0.193135 | 0.226166  | 0.99818     | 0.997833     |

| Cause                                            | Sex    | Age start   | Age end     | Predictive validity |          |          |           |             |              |
|--------------------------------------------------|--------|-------------|-------------|---------------------|----------|----------|-----------|-------------|--------------|
|                                                  |        |             |             | RMSE in             | RMSE out | Trend in | Trend out | Coverage in | Coverage out |
| Other congenital birth defects [Global]          | Male   | 0-6 days    | 65-69 years | 0.285221            | 0.511445 | 0.201802 | 0.205283  | 0.998218    | 0.992513     |
| Other congenital birth defects [Global]          | Female | 0-6 days    | 65-69 years | 0.317722            | 0.537403 | 0.212073 | 0.21541   | 0.997938    | 0.991635     |
| Skin and subcutaneous diseases [Global]          | Male   | 28-364 days | 95+ years   | 0.3672              | 0.650491 | 0.184491 | 0.193184  | 0.998991    | 0.981999     |
| Skin and subcutaneous diseases [Data Rich]       | Male   | 28-364 days | 95+ years   | 0.266632            | 0.375883 | 0.150205 | 0.168012  | 0.999584    | 0.999295     |
| Skin and subcutaneous diseases [Global]          | Female | 28-364 days | 95+ years   | 0.415095            | 0.673493 | 0.189984 | 0.20069   | 0.997971    | 0.979738     |
| Skin and subcutaneous diseases [Data Rich]       | Female | 28-364 days | 95+ years   | 0.33827             | 0.449693 | 0.161021 | 0.173859  | 0.998784    | 0.998457     |
| Cellulitis [Data Rich]                           | Male   | 28-364 days | 95+ years   | 0.753763            | 1.0827   | 0.33351  | 0.397886  | 0.931212    | 0.935022     |
| Cellulitis [Data Rich]                           | Female | 28-364 days | 95+ years   | 0.788799            | 1.15588  | 0.354573 | 0.455775  | 0.931552    | 0.936892     |
| Cellulitis [Global]                              | Male   | 28-364 days | 95+ years   | 0.790628            | 1.11121  | 0.364602 | 0.379862  | 0.936772    | 0.920542     |
| Cellulitis [Global]                              | Female | 28-364 days | 95+ years   | 0.776284            | 1.1262   | 0.387978 | 0.407421  | 0.932359    | 0.91306      |
| Pyoderma [Data Rich]                             | Female | 0-6 days    | 95+ years   | 0.336027            | 0.663116 | 0.156225 | 0.177377  | 0.997513    | 0.98434      |
| Pyoderma [Data Rich]                             | Male   | 0-6 days    | 95+ years   | 0.290649            | 0.614129 | 0.151013 | 0.180725  | 0.998859    | 0.998974     |
| Pyoderma [Global]                                | Male   | 0-6 days    | 95+ years   | 0.273788            | 0.624938 | 0.180327 | 0.197251  | 0.998866    | 0.988581     |
| Pyoderma [Global]                                | Female | 0-6 days    | 95+ years   | 0.33107             | 0.69326  | 0.181422 | 0.191996  | 0.997678    | 0.982623     |
| Decubitus ulcer [Global]                         | Male   | 1-4 years   | 95+ years   | 0.50257             | 0.941445 | 0.345863 | 0.357162  | 0.880411    | 0.865533     |
| Decubitus ulcer [Global]                         | Female | 1-4 years   | 95+ years   | 0.581897            | 1.02705  | 0.361056 | 0.370252  | 0.860832    | 0.857385     |
| Decubitus ulcer [Data Rich]                      | Male   | 1-4 years   | 95+ years   | 0.413522            | 0.71087  | 0.299495 | 0.38014   | 0.865576    | 0.869143     |
| Decubitus ulcer [Data Rich]                      | Female | 1-4 years   | 95+ years   | 0.433093            | 0.770629 | 0.306077 | 0.421206  | 0.848806    | 0.856264     |
| Other skin and subcutaneous diseases [Data Rich] | Male   | 28-364 days | 95+ years   | 0.513794            | 0.699422 | 0.320919 | 0.360791  | 0.907632    | 0.909962     |
| Other skin and subcutaneous diseases [Data Rich] | Female | 28-364 days | 95+ years   | 0.448461            | 0.719114 | 0.33847  | 0.425333  | 0.927983    | 0.931747     |
| Other skin and subcutaneous diseases [Global]    | Male   | 28-364 days | 95+ years   | 0.478767            | 0.829998 | 0.356372 | 0.461161  | 0.914516    | 0.905996     |
| Other skin and subcutaneous diseases [Global]    | Female | 28-364 days | 95+ years   | 0.522311            | 0.855571 | 0.376522 | 0.395195  | 0.933857    | 0.92236      |
| Sudden infant death syndrome [Global]            | Male   | 7-27 days   | 28-364 days | 0.339839            | 0.601128 | 0.244098 | 0.260482  | 0.999345    | 0.978879     |
| Sudden infant death syndrome [Data Rich]         | Male   | 7-27 days   | 28-364 days | 0.300618            | 0.552031 | 0.217784 | 0.270153  | 0.999511    | 0.996211     |
| Sudden infant death syndrome [Global]            | Female | 7-27 days   | 28-364 days | 0.441559            | 0.691189 | 0.325347 | 0.345983  | 0.996276    | 0.980519     |
| Sudden infant death syndrome [Data Rich]         | Female | 7-27 days   | 28-364 days | 0.396941            | 0.649331 | 0.29697  | 0.380264  | 0.996363    | 0.992083     |
| Transport injuries [Data Rich]                   | Female | 0-6 days    | 95+ years   | 0.178093            | 0.228732 | 0.13385  | 0.155904  | 0.999531    | 0.999029     |
| Transport injuries [Data Rich]                   | Male   | 0-6 days    | 95+ years   | 0.16665             | 0.212812 | 0.125194 | 0.145828  | 0.999288    | 0.998489     |
| Transport injuries [Global]                      | Male   | 0-6 days    | 95+ years   | 0.266235            | 0.369045 | 0.257365 | 0.245403  | 0.998807    | 0.988513     |
| Transport injuries [Global]                      | Female | 0-6 days    | 95+ years   | 0.23338             | 0.356729 | 0.191041 | 0.192905  | 0.999187    | 0.990441     |
| Road injuries [Global]                           | Male   | 0-6 days    | 95+ years   | 0.202111            | 0.324708 | 0.142595 | 0.145277  | 0.99922     | 0.989124     |
| Road injuries [Data Rich]                        | Male   | 0-6 days    | 95+ years   | 0.170057            | 0.221353 | 0.127909 | 0.149485  | 0.999297    | 0.998695     |
| Road injuries [Global]                           | Female | 0-6 days    | 95+ years   | 0.225393            | 0.348102 | 0.155683 | 0.161219  | 0.999258    | 0.992833     |
| Road injuries [Data Rich]                        | Female | 0-6 days    | 95+ years   | 0.181397            | 0.235701 | 0.138397 | 0.151993  | 0.999462    | 0.998812     |
| Pedestrian road injuries [Global]                | Female | 0-6 days    | 95+ years   | 0.2531              | 0.417919 | 0.186479 | 0.193764  | 0.99872     | 0.98956      |
| Pedestrian road injuries [Data Rich]             | Female | 0-6 days    | 95+ years   | 0.221123            | 0.338561 | 0.167257 | 0.195877  | 0.998953    | 0.998112     |
| Pedestrian road injuries [Global]                | Male   | 0-6 days    | 95+ years   | 0.217427            | 0.36672  | 0.154149 | 0.153652  | 0.998606    | 0.988732     |
| Pedestrian road injuries [Data Rich]             | Male   | 0-6 days    | 95+ years   | 0.190473            | 0.286592 | 0.132116 | 0.154124  | 0.999445    | 0.998841     |
| Cyclist road injuries [Data Rich]                | Female | 1-4 years   | 95+ years   | 0.338506            | 0.568756 | 0.24029  | 0.30528   | 0.997842    | 0.99679      |
| Cyclist road injuries [Global]                   | Male   | 1-4 years   | 95+ years   | 0.256014            | 0.519827 | 0.175462 | 0.186021  | 0.999878    | 0.992249     |
| Cyclist road injuries [Data Rich]                | Male   | 1-4 years   | 95+ years   | 0.221866            | 0.393751 | 0.159234 | 0.196157  | 0.999958    | 0.999839     |
| Cyclist road injuries [Global]                   | Female | 1-4 years   | 95+ years   | 0.355166            | 0.635939 | 0.25048  | 0.267805  | 0.99803     | 0.988668     |
| Motorcyclist road injuries [Data Rich]           | Female | 0-6 days    | 95+ years   | 0.304692            | 0.544763 | 0.191574 | 0.228659  | 0.999427    | 0.99887      |
| Motorcyclist road injuries [Global]              | Male   | 0-6 days    | 95+ years   | 0.276041            | 0.523365 | 0.174247 | 0.181648  | 0.999735    | 0.991251     |
| Motorcyclist road injuries [Data Rich]           | Male   | 0-6 days    | 95+ years   | 0.217226            | 0.423942 | 0.147619 | 0.187707  | 0.999862    | 0.999352     |
| Motorcyclist road injuries [Global]              | Female | 0-6 days    | 95+ years   | 0.31903             | 0.633083 | 0.214623 | 0.224927  | 0.999124    | 0.992317     |
| Motor vehicle road injuries [Global]             | Female | 0-6 days    | 95+ years   | 0.248079            | 0.382929 | 0.166578 | 0.1664    | 0.998962    | 0.992992     |
| Motor vehicle road injuries [Data Rich]          | Female | 0-6 days    | 95+ years   | 0.22088             | 0.308966 | 0.153298 | 0.166921  | 0.999075    | 0.998435     |
| Motor vehicle road injuries [Global]             | Male   | 0-6 days    | 95+ years   | 0.255246            | 0.372221 | 0.151574 | 0.156652  | 0.999219    | 0.991422     |
| Motor vehicle road injuries [Data Rich]          | Male   | 0-6 days    | 95+ years   | 0.213548            | 0.306557 | 0.139843 | 0.160713  | 0.999358    | 0.998911     |
| Other road injuries [Data Rich]                  | Female | 0-6 days    | 95+ years   | 0.657277            | 0.957272 | 0.387137 | 0.525825  | 0.985101    | 0.976001     |
| Other road injuries [Global]                     | Male   | 0-6 days    | 95+ years   | 0.611513            | 0.955473 | 0.367719 | 0.430569  | 0.981604    | 0.94532      |
| Other road injuries [Data Rich]                  | Male   | 0-6 days    | 95+ years   | 0.596521            | 1.05509  | 0.351374 | 0.544563  | 0.984379    | 0.964251     |
| Other road injuries [Global]                     | Female | 0-6 days    | 95+ years   | 0.641589            | 0.956742 | 0.395337 | 0.449469  | 0.98882     | 0.97059      |
| Other transport injuries [Global]                | Female | 0-6 days    | 95+ years   | 0.304012            | 0.578958 | 0.230219 | 0.250652  | 0.999029    | 0.991105     |
| Other transport injuries [Data Rich]             | Female | 0-6 days    | 95+ years   | 0.268641            | 0.405742 | 0.211648 | 0.265306  | 0.999102    | 0.998299     |
| Other transport injuries [Data Rich]             | Male   | 0-6 days    | 95+ years   | 0.257986            | 0.432871 | 0.186003 | 0.239068  | 0.998787    | 0.998015     |
| Other transport injuries [Global]                | Male   | 0-6 days    | 95+ years   | 0.285111            | 0.541896 | 0.201088 | 0.217991  | 0.9987      | 0.987271     |
| Unintentional injuries [Global]                  | Female | 28-364 days | 95+ years   | 0.265627            | 0.429182 | 0.221478 | 0.2393    | 0.996437    | 0.985499     |
| Unintentional injuries [Global]                  | Male   | 28-364 days | 95+ years   | 0.247703            | 0.361333 | 0.201256 | 0.204671  | 0.996857    | 0.986923     |
| Unintentional injuries [Data Rich]               | Male   | 28-364 days | 95+ years   | 0.14174             | 0.182504 | 0.112684 | 0.147915  | 0.999221    | 0.998382     |
| Unintentional injuries [Data Rich]               | Female | 28-364 days | 95+ years   | 0.151602            | 0.197651 | 0.119897 | 0.159946  | 0.999399    | 0.998939     |
| Falls [Global]                                   | Female | 0-6 days    | 95+ years   | 0.342582            | 0.51199  | 0.326434 | 0.32064   | 0.998223    | 0.990573     |
| Falls [Data Rich]                                | Female | 0-6 days    | 95+ years   | 0.222813            | 0.273661 | 0.153781 | 0.175941  | 0.999324    | 0.998706     |
| Falls [Global]                                   | Male   | 0-6 days    | 95+ years   | 0.315218            | 0.435895 | 0.293162 | 0.291023  | 0.998106    | 0.989895     |
| Falls [Data Rich]                                | Male   | 0-6 days    | 95+ years   | 0.214642            | 0.263607 | 0.152777 | 0.176564  | 0.999271    | 0.998738     |
| Drowning [Global]                                | Female | 0-6 days    | 95+ years   | 0.265501            | 0.46815  | 0.188149 | 0.192566  | 0.999434    | 0.993099     |
| Drowning [Data Rich]                             | Female | 0-6 days    | 95+ years   | 0.197504            | 0.270896 | 0.148256 | 0.179391  | 0.999593    | 0.999243     |
| Drowning [Global]                                | Male   | 0-6 days    | 95+ years   | 0.256468            | 0.411489 | 0.202912 | 0.206242  | 0.999117    | 0.991675     |
| Drowning [Data Rich]                             | Male   | 0-6 days    | 95+ years   | 0.192032            | 0.245323 | 0.146852 | 0.173137  | 0.999226    | 0.998719     |
| Fire, heat, and hot substances [Global]          | Female | 0-6 days    | 95+ years   | 0.278539            | 0.427835 | 0.178517 | 0.177412  | 0.999424    | 0.99497      |
| Fire, heat, and hot substances [Data Rich]       | Female | 0-6 days    | 95+ years   | 0.211045            | 0.261382 | 0.148898 | 0.174291  | 0.999762    | 0.999425     |
| Fire, heat, and hot substances [Global]          | Male   | 0-6 days    | 95+ years   | 0.265391            | 0.400118 | 0.168573 | 0.169865  | 0.999414    | 0.99661      |
| Fire, heat, and hot substances [Data Rich]       | Male   | 0-6 days    | 95+ years   | 0.180817            | 0.225133 | 0.134313 | 0.15739   | 0.999809    | 0.999587     |
| Poisonings [Global]                              | Female | 0-6 days    | 95+ years   | 0.363913            | 0.558864 | 0.325653 | 0.319755  | 0.998704    | 0.99503      |
| Poisonings [Data Rich]                           | Female | 0-6 days    | 95+ years   | 0.248195            | 0.339242 | 0.159465 | 0.195041  | 0.99973     | 0.999611     |
| Poisonings [Global]                              | Male   | 0-6 days    | 95+ years   | 0.38743             | 0.586584 | 0.345665 | 0.328941  | 0.998811    | 0.993562     |
| Poisonings [Data Rich]                           | Male   | 0-6 days    | 95+ years   | 0.23173             | 0.32102  | 0.153026 | 0.176181  | 0.999896    | 0.99965      |
| Exposure to mechanical forces [Global]           | Female | 0-6 days    | 95+ years   | 0.277305            | 0.485834 | 0.200585 | 0.200931  | 0.998376    | 0.992949     |
| Exposure to mechanical forces [Data Rich]        | Female | 0-6 days    | 95+ years   | 0.237379            | 0.350666 | 0.176189 | 0.202397  | 0.998436    | 0.997593     |
| Exposure to mechanical forces [Global]           | Male   | 0-6 days    | 95+ years   | 0.26981             | 0.482224 | 0.197341 | 0.20494   | 0.998815    | 0.987415     |
| Exposure to mechanical forces [Data Rich]        | Male   | 0-6 days    | 95+ years   | 0.230706            | 0.324934 | 0.173637 | 0.196758  | 0.999055    | 0.997666     |
| Unintentional firearm injuries [Global]          | Female | 0-6 days    | 95+ years   | 0.330253            | 0.585059 | 0.223999 | 0.238007  | 0.997656    | 0.991053     |
| Unintentional firearm injuries [Data Rich]       | Female | 0-6 days    | 95+ years   | 0.287536            | 0.425876 | 0.197302 | 0.26113   | 0.99814     | 0.997585     |
| Unintentional firearm injuries [Global]          | Male   | 0-6 days    | 95+ years   | 0.350046            | 0.62231  | 0.223178 | 0.240928  | 0.998172    | 0.988233     |
| Unintentional firearm injuries [Data Rich]       | Male   | 0-6 days    | 95+ years   | 0.271991            | 0.391207 | 0.18968  | 0.222404  | 0.998608    | 0.997554     |
| Unintentional suffocation [Global]               | Female | 0-6 days    | 95+ years   | 0.666771            | 1.11923  | 0.503752 | 0.490551  | 0.941473    | 0.938713     |
| Unintentional suffocation [Data Rich]            | Female | 0-6 days    | 95+ years   | 0.562645            | 0.95589  | 0.362665 | 0.332349  | 0.929299    | 0.928815     |
| Unintentional suffocation [Global]               | Male   | 0-6 days    | 95+ years   | 0.536916            | 0.840867 | 0.353135 | 0.336339  | 0.986825    | 0.976978     |

| Cause                                                       | Sex    | Age start   | Age end   | Predictive validity |          |          |           |             |              |
|-------------------------------------------------------------|--------|-------------|-----------|---------------------|----------|----------|-----------|-------------|--------------|
|                                                             |        |             |           | RMSE in             | RMSE out | Trend in | Trend out | Coverage in | Coverage out |
| Unintentional suffocation [Data Rich]                       | Male   | 0-6 days    | 95+ years | 0.485744            | 0.616624 | 0.269508 | 0.296729  | 0.990117    | 0.988359     |
| Other exposure to mechanical forces [Global]                | Female | 0-6 days    | 95+ years | 0.310983            | 0.52893  | 0.195088 | 0.206481  | 0.999236    | 0.994664     |
| Other exposure to mechanical forces [Data Rich]             | Female | 0-6 days    | 95+ years | 0.272069            | 0.350792 | 0.168325 | 0.190263  | 0.9993      | 0.998881     |
| Other exposure to mechanical forces [Global]                | Male   | 0-6 days    | 95+ years | 0.27564             | 0.459333 | 0.19024  | 0.192902  | 0.999035    | 0.993449     |
| Other exposure to mechanical forces [Data Rich]             | Male   | 0-6 days    | 95+ years | 0.236078            | 0.305896 | 0.165067 | 0.180858  | 0.999273    | 0.998735     |
| Adverse effects of medical treatment [Global]               | Female | 0-6 days    | 95+ years | 0.277804            | 0.422352 | 0.170211 | 0.175682  | 0.99914     | 0.991971     |
| Adverse effects of medical treatment [Data Rich]            | Female | 0-6 days    | 95+ years | 0.25697             | 0.310226 | 0.151931 | 0.166847  | 0.999284    | 0.998475     |
| Adverse effects of medical treatment [Global]               | Male   | 0-6 days    | 95+ years | 0.284293            | 0.448456 | 0.170906 | 0.179479  | 0.998995    | 0.99214      |
| Adverse effects of medical treatment [Data Rich]            | Male   | 0-6 days    | 95+ years | 0.270953            | 0.339952 | 0.156556 | 0.169666  | 0.999153    | 0.998578     |
| Animal contact [Global]                                     | Female | 0-6 days    | 95+ years | 0.45516             | 0.727816 | 0.291208 | 0.311011  | 0.997197    | 0.988248     |
| Animal contact [Data Rich]                                  | Female | 0-6 days    | 95+ years | 0.369492            | 0.530666 | 0.267072 | 0.346026  | 0.99729     | 0.996424     |
| Animal contact [Global]                                     | Male   | 0-6 days    | 95+ years | 0.324399            | 0.659801 | 0.230414 | 0.240986  | 0.998432    | 0.991142     |
| Animal contact [Data Rich]                                  | Male   | 0-6 days    | 95+ years | 0.335072            | 0.436601 | 0.204842 | 0.246205  | 0.998691    | 0.998418     |
| Venomous animal contact [Global]                            | Female | 0-6 days    | 95+ years | 0.697947            | 1.04033  | 0.396417 | 0.427921  | 0.955388    | 0.934704     |
| Venomous animal contact [Data Rich]                         | Female | 0-6 days    | 95+ years | 0.580129            | 0.856224 | 0.376524 | 0.476426  | 0.945998    | 0.948084     |
| Venomous animal contact [Global]                            | Male   | 0-6 days    | 95+ years | 0.516482            | 0.951022 | 0.382786 | 0.393778  | 0.967797    | 0.951414     |
| Venomous animal contact [Data Rich]                         | Male   | 0-6 days    | 95+ years | 0.615749            | 0.884281 | 0.358758 | 0.462012  | 0.961706    | 0.963653     |
| Non-venomous animal contact [Global]                        | Female | 0-6 days    | 95+ years | 0.40422             | 0.696076 | 0.295515 | 0.310348  | 0.996634    | 0.990183     |
| Non-venomous animal contact [Data Rich]                     | Female | 0-6 days    | 95+ years | 0.403473            | 0.583058 | 0.275472 | 0.339343  | 0.996799    | 0.995931     |
| Non-venomous animal contact [Global]                        | Male   | 0-6 days    | 95+ years | 0.326049            | 0.660361 | 0.23192  | 0.237603  | 0.998455    | 0.993782     |
| Non-venomous animal contact [Data Rich]                     | Male   | 0-6 days    | 95+ years | 0.28393             | 0.435882 | 0.21254  | 0.240679  | 0.998475    | 0.997935     |
| Foreign body [Global]                                       | Female | 0-6 days    | 95+ years | 0.246435            | 0.437991 | 0.170271 | 0.173202  | 0.999156    | 0.989383     |
| Foreign body [Data Rich]                                    | Female | 0-6 days    | 95+ years | 0.200456            | 0.301515 | 0.147047 | 0.175785  | 0.999796    | 0.999281     |
| Foreign body [Global]                                       | Male   | 0-6 days    | 95+ years | 0.242082            | 0.430659 | 0.158778 | 0.161405  | 0.999432    | 0.98959      |
| Foreign body [Data Rich]                                    | Male   | 0-6 days    | 95+ years | 0.183536            | 0.272549 | 0.134847 | 0.156308  | 0.999771    | 0.999405     |
| Pulmonary aspiration and foreign body in airway [Global]    | Female | 0-6 days    | 95+ years | 0.303461            | 0.476433 | 0.177523 | 0.178453  | 0.999589    | 0.992601     |
| Pulmonary aspiration and foreign body in airway [Data Rich] | Female | 0-6 days    | 95+ years | 0.264922            | 0.389206 | 0.163327 | 0.181083  | 0.999647    | 0.999303     |
| Pulmonary aspiration and foreign body in airway [Global]    | Male   | 0-6 days    | 95+ years | 0.264978            | 0.439347 | 0.155873 | 0.15951   | 0.999831    | 0.992246     |
| Pulmonary aspiration and foreign body in airway [Data Rich] | Male   | 0-6 days    | 95+ years | 0.245738            | 0.342596 | 0.143368 | 0.155372  | 0.99992     | 0.999766     |
| Foreign body in other body part [Global]                    | Female | 0-6 days    | 95+ years | 0.516905            | 0.847357 | 0.329246 | 0.340228  | 0.976911    | 0.962962     |
| Foreign body in other body part [Data Rich]                 | Female | 0-6 days    | 95+ years | 0.532832            | 0.771815 | 0.2963   | 0.374276  | 0.973181    | 0.975492     |
| Foreign body in other body part [Global]                    | Male   | 0-6 days    | 95+ years | 0.455273            | 0.801863 | 0.263772 | 0.276564  | 0.988795    | 0.97621      |
| Foreign body in other body part [Data Rich]                 | Male   | 0-6 days    | 95+ years | 0.347543            | 0.57796  | 0.233789 | 0.280881  | 0.986257    | 0.986669     |
| Other unintentional injuries [Data Rich]                    | Female | 0-6 days    | 95+ years | 0.282628            | 0.405062 | 0.208497 | 0.243197  | 0.999075    | 0.998181     |
| Other unintentional injuries [Global]                       | Male   | 0-6 days    | 95+ years | 0.333847            | 0.600764 | 0.226617 | 0.238384  | 0.99712     | 0.98506      |
| Other unintentional injuries [Data Rich]                    | Male   | 0-6 days    | 95+ years | 0.24534             | 0.367449 | 0.178495 | 0.227869  | 0.999152    | 0.998461     |
| Other unintentional injuries [Global]                       | Female | 0-6 days    | 95+ years | 0.404994            | 0.681078 | 0.255582 | 0.253189  | 0.99704     | 0.984534     |
| Self-harm and interpersonal violence [Global]               | Female | 0-6 days    | 95+ years | 0.235051            | 0.401327 | 0.170803 | 0.17549   | 0.999207    | 0.990475     |
| Self-harm and interpersonal violence [Data Rich]            | Female | 0-6 days    | 95+ years | 0.187094            | 0.240753 | 0.142445 | 0.169281  | 0.999232    | 0.998628     |
| Self-harm and interpersonal violence [Global]               | Male   | 0-6 days    | 95+ years | 0.25566             | 0.378724 | 0.1656   | 0.167687  | 0.998779    | 0.985871     |
| Self-harm and interpersonal violence [Data Rich]            | Male   | 0-6 days    | 95+ years | 0.210671            | 0.250648 | 0.145579 | 0.165786  | 0.998972    | 0.998037     |
| Self-harm [Global]                                          | Female | 10-14 years | 95+ years | 0.217656            | 0.397101 | 0.157745 | 0.162568  | 0.999368    | 0.990863     |
| Self-harm [Data Rich]                                       | Female | 10-14 years | 95+ years | 0.17629             | 0.239874 | 0.132643 | 0.164204  | 0.999455    | 0.998917     |
| Self-harm [Global]                                          | Male   | 10-14 years | 95+ years | 0.208467            | 0.349662 | 0.155916 | 0.155504  | 0.999331    | 0.985926     |
| Self-harm [Data Rich]                                       | Male   | 10-14 years | 95+ years | 0.177784            | 0.217925 | 0.125122 | 0.144276  | 0.999538    | 0.999159     |
| Self-harm by firearm [Global]                               | Female | 10-14 years | 95+ years | 0.268421            | 0.602681 | 0.188694 | 0.185632  | 0.995432    | 0.983562     |
| Self-harm by firearm [Data Rich]                            | Female | 10-14 years | 95+ years | 0.216662            | 0.397634 | 0.162961 | 0.178553  | 0.995318    | 0.995558     |
| Self-harm by firearm [Global]                               | Male   | 10-14 years | 95+ years | 0.264012            | 0.583163 | 0.162403 | 0.16445   | 0.999093    | 0.973501     |
| Self-harm by firearm [Data Rich]                            | Male   | 10-14 years | 95+ years | 0.215023            | 0.384896 | 0.151941 | 0.179177  | 0.998654    | 0.998623     |
| Self-harm by other specified means [Global]                 | Female | 10-14 years | 95+ years | 0.203918            | 0.401623 | 0.149391 | 0.153881  | 0.999643    | 0.990736     |
| Self-harm by other specified means [Data Rich]              | Female | 10-14 years | 95+ years | 0.177384            | 0.302742 | 0.131997 | 0.158796  | 0.999652    | 0.999218     |
| Self-harm by other specified means [Global]                 | Male   | 10-14 years | 95+ years | 0.185924            | 0.353671 | 0.138638 | 0.142126  | 0.999613    | 0.990342     |
| Self-harm by other specified means [Data Rich]              | Male   | 10-14 years | 95+ years | 0.167454            | 0.253534 | 0.124347 | 0.141101  | 0.999743    | 0.999384     |
| Interpersonal violence [Global]                             | Female | 0-6 days    | 95+ years | 0.315554            | 0.461772 | 0.22912  | 0.226349  | 0.998981    | 0.99146      |
| Interpersonal violence [Data Rich]                          | Female | 0-6 days    | 95+ years | 0.24386             | 0.29461  | 0.18662  | 0.233847  | 0.999756    | 0.999333     |
| Interpersonal violence [Global]                             | Male   | 0-6 days    | 95+ years | 0.311602            | 0.514929 | 0.223365 | 0.22344   | 0.998122    | 0.984774     |
| Interpersonal violence [Data Rich]                          | Male   | 0-6 days    | 95+ years | 0.293886            | 0.330614 | 0.181077 | 0.223183  | 0.999468    | 0.998711     |
| Physical violence by firearm [Global]                       | Female | 0-6 days    | 95+ years | 0.4281              | 0.657151 | 0.26517  | 0.269069  | 0.996552    | 0.987641     |
| Physical violence by firearm [Data Rich]                    | Female | 0-6 days    | 95+ years | 0.377312            | 0.527261 | 0.241881 | 0.301523  | 0.99741     | 0.996764     |
| Physical violence by firearm [Global]                       | Male   | 0-6 days    | 95+ years | 0.449719            | 0.754667 | 0.234939 | 0.228238  | 0.996239    | 0.978307     |
| Physical violence by firearm [Data Rich]                    | Male   | 0-6 days    | 95+ years | 0.356808            | 0.542516 | 0.197151 | 0.220232  | 0.997013    | 0.996687     |
| Physical violence by sharp object [Global]                  | Female | 0-6 days    | 95+ years | 0.316043            | 0.510877 | 0.200604 | 0.199832  | 0.999321    | 0.99571      |
| Physical violence by sharp object [Data Rich]               | Female | 0-6 days    | 95+ years | 0.253748            | 0.369849 | 0.166455 | 0.195789  | 0.99975     | 0.99952      |
| Physical violence by sharp object [Global]                  | Male   | 0-6 days    | 95+ years | 0.303462            | 0.521764 | 0.190015 | 0.193157  | 0.999227    | 0.992199     |
| Physical violence by sharp object [Data Rich]               | Male   | 0-6 days    | 95+ years | 0.24852             | 0.358879 | 0.159806 | 0.188557  | 0.999699    | 0.999539     |
| Physical violence by other means [Global]                   | Female | 0-6 days    | 95+ years | 0.256265            | 0.420103 | 0.169572 | 0.174644  | 0.999652    | 0.999665     |
| Physical violence by other means [Data Rich]                | Female | 0-6 days    | 95+ years | 0.207867            | 0.300267 | 0.148057 | 0.176236  | 0.999915    | 0.999815     |
| Physical violence by other means [Global]                   | Male   | 0-6 days    | 95+ years | 0.254297            | 0.472236 | 0.163508 | 0.172898  | 0.999602    | 0.992736     |
| Physical violence by other means [Data Rich]                | Male   | 0-6 days    | 95+ years | 0.309159            | 0.39638  | 0.151173 | 0.179453  | 0.999909    | 0.999774     |
| Environmental heat and cold exposure [Global]               | Female | 0-6 days    | 95+ years | 0.400289            | 0.702947 | 0.239279 | 0.236565  | 0.997876    | 0.988749     |
| Environmental heat and cold exposure [Data Rich]            | Female | 0-6 days    | 95+ years | 0.312333            | 0.43617  | 0.196866 | 0.223056  | 0.998932    | 0.998339     |
| Environmental heat and cold exposure [Global]               | Male   | 0-6 days    | 95+ years | 0.342831            | 0.606037 | 0.221734 | 0.22563   | 0.998592    | 0.990347     |
| Environmental heat and cold exposure [Data Rich]            | Male   | 0-6 days    | 95+ years | 0.322236            | 0.405577 | 0.192466 | 0.225036  | 0.998935    | 0.998271     |
| Acute lymphoid leukemia [Data Rich]                         | Female | 0-6 days    | 95+ years | 0.245042            | 0.343861 | 0.199697 | 0.196121  | 0.999735    | 0.998677     |
| Acute lymphoid leukemia [Data Rich]                         | Male   | 0-6 days    | 95+ years | 0.232196            | 0.322463 | 0.192678 | 0.180934  | 0.999027    | 0.997797     |
| Acute lymphoid leukemia [Global]                            | Female | 0-6 days    | 95+ years | 0.292299            | 0.430489 | 0.219397 | 0.219718  | 0.999584    | 0.995845     |
| Acute lymphoid leukemia [Global]                            | Male   | 0-6 days    | 95+ years | 0.258168            | 0.380972 | 0.20477  | 0.202271  | 0.999191    | 0.996156     |
| Chronic lymphoid leukemia [Data Rich]                       | Male   | 15-19 years | 95+ years | 0.264066            | 0.422453 | 0.205004 | 0.200284  | 0.999068    | 0.99624      |
| Chronic lymphoid leukemia [Data Rich]                       | Female | 15-19 years | 95+ years | 0.229014            | 0.365306 | 0.185879 | 0.188733  | 0.997496    | 0.995669     |
| Chronic lymphoid leukemia [Global]                          | Male   | 15-19 years | 95+ years | 0.281442            | 0.49744  | 0.21614  | 0.218752  | 0.997518    | 0.992235     |
| Chronic lymphoid leukemia [Global]                          | Female | 15-19 years | 95+ years | 0.268922            | 0.428058 | 0.20953  | 0.209509  | 0.997841    | 0.991753     |
| Acute myeloid leukemia [Data Rich]                          | Female | 0-6 days    | 95+ years | 0.243902            | 0.359063 | 0.198629 | 0.202072  | 0.999145    | 0.99819      |
| Acute myeloid leukemia [Data Rich]                          | Male   | 0-6 days    | 95+ years | 0.232648            | 0.331949 | 0.175921 | 0.178595  | 0.999717    | 0.999322     |
| Acute myeloid leukemia [Global]                             | Male   | 0-6 days    | 95+ years | 0.265031            | 0.360267 | 0.184561 | 0.180444  | 0.99956     | 0.995375     |
| Acute myeloid leukemia [Global]                             | Female | 0-6 days    | 95+ years | 0.281417            | 0.410413 | 0.213481 | 0.218102  | 0.999242    | 0.994128     |
| Chronic myeloid leukemia [Data Rich]                        | Female | 28-364 days | 95+ years | 0.252758            | 0.362538 | 0.219213 | 0.209664  | 0.999697    | 0.998442     |
| Chronic myeloid leukemia [Data Rich]                        | Female | 28-364 days | 95+ years | 0.295483            | 0.439364 | 0.230637 | 0.214173  | 0.99951     | 0.996227     |
| Chronic myeloid leukemia [Global]                           | Male   | 28-364 days | 95+ years | 0.27712             | 0.436653 | 0.219288 | 0.215423  | 0.999912    | 0.997674     |
| Chronic myeloid leukemia [Data Rich]                        | Male   | 28-364 days | 95+ years | 0.247795            | 0.36944  | 0.21216  | 0.201106  | 0.999952    | 0.999142     |

| Cause                                                          | Sex    | Age start   | Age end   | Predictive validity |          |          |           |             |              |
|----------------------------------------------------------------|--------|-------------|-----------|---------------------|----------|----------|-----------|-------------|--------------|
|                                                                |        |             |           | RMSE in             | RMSE out | Trend in | Trend out | Coverage in | Coverage out |
| Non-melanoma skin cancer (squamous-cell carcinoma) [Data Rich] | Male   | 28-364 days | 95+ years | 0.154952            | 0.235392 | 0.111747 | 0.134674  | 0.999782    | 0.999627     |
| Non-melanoma skin cancer (squamous-cell carcinoma) [Data Rich] | Female | 28-364 days | 95+ years | 0.21458             | 0.296797 | 0.160927 | 0.184583  | 0.997336    | 0.997268     |
| Non-melanoma skin cancer (squamous-cell carcinoma) [Global]    | Male   | 28-364 days | 95+ years | 0.186211            | 0.307069 | 0.133081 | 0.13346   | 0.999225    | 0.993893     |
| Non-melanoma skin cancer (squamous-cell carcinoma) [Global]    | Female | 28-364 days | 95+ years | 0.27535             | 0.449328 | 0.203049 | 0.202074  | 0.996456    | 0.987022     |
| Executions and police conflict [Data Rich]                     | Female | 28-364 days | 95+ years | 1.02223             | 1.8106   | 0.751817 | 0.849982  | 0.492976    | 0.491353     |
| Executions and police conflict [Data Rich]                     | Male   | 28-364 days | 95+ years | 0.956151            | 1.53927  | 0.733321 | 0.763561  | 0.542338    | 0.533615     |
| Executions and police conflict [Global]                        | Female | 28-364 days | 95+ years | 1.26666             | 2.24823  | 0.868605 | 0.899107  | 0.579692    | 0.567374     |
| Executions and police conflict [Global]                        | Male   | 28-364 days | 95+ years | 1.08137             | 2.00266  | 0.782974 | 0.803373  | 0.617898    | 0.614573     |
| Alcoholic cardiomyopathy [Data Rich]                           | Male   | 15-19 years | 95+ years | 0.409553            | 0.488649 | 0.31186  | 0.187192  | 0.992843    | 0.990469     |
| Alcoholic cardiomyopathy [Data Rich]                           | Female | 15-19 years | 95+ years | 0.354647            | 0.473835 | 0.279984 | 0.192157  | 0.995654    | 0.9947       |
| Alcoholic cardiomyopathy [Global]                              | Male   | 15-19 years | 95+ years | 0.451007            | 0.658827 | 0.333662 | 0.305105  | 0.993453    | 0.975137     |
| Alcoholic cardiomyopathy [Global]                              | Female | 15-19 years | 95+ years | 0.386369            | 0.712305 | 0.302125 | 0.293367  | 0.995187    | 0.976786     |
| Myocarditis [Data Rich]                                        | Male   | 0-6 days    | 95+ years | 0.383562            | 0.516893 | 0.207055 | 0.236706  | 0.999619    | 0.999248     |
| Myocarditis [Data Rich]                                        | Female | 0-6 days    | 95+ years | 0.417659            | 0.571804 | 0.258073 | 0.259341  | 0.998574    | 0.997488     |
| Myocarditis [Global]                                           | Male   | 0-6 days    | 95+ years | 0.419899            | 0.640487 | 0.231553 | 0.238295  | 0.99946     | 0.989799     |
| Myocarditis [Global]                                           | Female | 0-6 days    | 95+ years | 0.483087            | 0.743786 | 0.281852 | 0.28418   | 0.998558    | 0.985813     |
| Other leukemia [Data Rich]                                     | Female | 0-6 days    | 95+ years | 0.3508              | 0.490285 | 0.278612 | 0.300191  | 0.996341    | 0.993081     |
| Other leukemia [Data Rich]                                     | Male   | 0-6 days    | 95+ years | 0.282754            | 0.349516 | 0.239149 | 0.221327  | 0.998039    | 0.995322     |
| Other leukemia [Global]                                        | Female | 0-6 days    | 95+ years | 0.413955            | 0.570583 | 0.311448 | 0.31415   | 0.997038    | 0.983931     |
| Other leukemia [Global]                                        | Male   | 0-6 days    | 95+ years | 0.34794             | 0.480636 | 0.275768 | 0.263252  | 0.998417    | 0.987829     |
| Other cardiomyopathy [Data Rich]                               | Male   | 0-6 days    | 95+ years | 0.321704            | 0.433377 | 0.236585 | 0.223511  | 0.996093    | 0.993778     |
| Other cardiomyopathy [Data Rich]                               | Female | 0-6 days    | 95+ years | 0.300694            | 0.424815 | 0.211684 | 0.226584  | 0.998302    | 0.997317     |
| Other cardiomyopathy [Global]                                  | Male   | 0-6 days    | 95+ years | 0.357059            | 0.574903 | 0.257105 | 0.256145  | 0.996198    | 0.975796     |
| Other cardiomyopathy [Global]                                  | Female | 0-6 days    | 95+ years | 0.354721            | 0.592673 | 0.236575 | 0.240023  | 0.998311    | 0.981594     |

Note: Only causes modeled in CODEm are included in this table.

Appendix Table 8: Comparison of GBD 2015 and GBD 2016 covariates and level of covariates in cause of death modeling

| Cause                        | Sex    | Covariate                                              | GBD 2015 |         |         | GBD 2016 |         |         |
|------------------------------|--------|--------------------------------------------------------|----------|---------|---------|----------|---------|---------|
|                              |        |                                                        | Level 1  | Level 2 | Level 3 | Level 1  | Level 2 | Level 3 |
| Tuberculosis                 | Male   | Alcohol (liters per capita)                            |          | X       |         | X        |         |         |
| Tuberculosis                 | Male   | Diabetes Fasting Plasma Glucose (mmol/L)               | X        |         |         | X        |         |         |
| Tuberculosis                 | Male   | Diabetes Fasting Plasma Glucose (mmol/L)               |          | X       |         | X        |         |         |
| Tuberculosis                 | Male   | Education (years per capita)                           |          |         | X       |          |         | X       |
| Tuberculosis                 | Male   | LDI (\$ per capita)                                    |          |         | X       |          |         | X       |
| Tuberculosis                 | Male   | Indoor Air Pollution (All Cooking Fuels)               | X        |         |         |          | X       |         |
| Tuberculosis                 | Male   | Indoor Air Pollution (All Cooking Fuels)               |          | X       |         |          | X       |         |
| Tuberculosis                 | Male   | Population Density (500-1000 ppl/sqkm, proportion)     |          | X       |         |          | X       |         |
| Tuberculosis                 | Male   | Population Density (over 1000 ppl/sqkm, proportion)    |          | X       |         |          | X       |         |
| Tuberculosis                 | Male   | Smoking Prevalence                                     | X        |         |         | X        |         |         |
| Tuberculosis                 | Male   | Smoking Prevalence                                     |          | X       |         | X        |         |         |
| Tuberculosis                 | Male   | Log-transformed SEV scalar: TB                         | X        |         |         | X        |         |         |
| Tuberculosis                 | Male   | Socio-demographic Index                                |          |         | X       |          |         | X       |
| Tuberculosis                 | Female | Alcohol (liters per capita)                            |          | X       |         | X        |         |         |
| Tuberculosis                 | Female | Diabetes Fasting Plasma Glucose (mmol/L)               | X        |         |         | X        |         |         |
| Tuberculosis                 | Female | Diabetes Fasting Plasma Glucose (mmol/L)               |          | X       |         | X        |         |         |
| Tuberculosis                 | Female | Education (years per capita)                           |          |         | X       |          |         | X       |
| Tuberculosis                 | Female | LDI (\$ per capita)                                    |          |         | X       |          |         | X       |
| Tuberculosis                 | Female | Indoor Air Pollution (All Cooking Fuels)               | X        |         |         |          | X       |         |
| Tuberculosis                 | Female | Indoor Air Pollution (All Cooking Fuels)               |          | X       |         |          | X       |         |
| Tuberculosis                 | Female | Population Density (500-1000 ppl/sqkm, proportion)     |          | X       |         |          | X       |         |
| Tuberculosis                 | Female | Population Density (over 1000 ppl/sqkm, proportion)    |          | X       |         |          | X       |         |
| Tuberculosis                 | Female | Smoking Prevalence                                     | X        |         |         | X        |         |         |
| Tuberculosis                 | Female | Smoking Prevalence                                     |          | X       |         | X        |         |         |
| Tuberculosis                 | Female | Log-transformed SEV scalar: TB                         | X        |         |         | X        |         |         |
| Tuberculosis                 | Female | Socio-demographic Index                                |          |         | X       |          |         | X       |
| Diarrheal diseases           | Male   | Education (years per capita)                           |          |         | X       |          |         | X       |
| Diarrheal diseases           | Male   | LDI (\$ per capita)                                    |          |         | X       |          |         | X       |
| Diarrheal diseases           | Male   | Underweight (proportion <2SD weight for age, <5 years) |          | X       |         | X        |         |         |
| Diarrheal diseases           | Male   | Population Density (over 1000 ppl/sqkm, proportion)    |          |         | X       |          |         | X       |
| Diarrheal diseases           | Male   | Population Density (under 150 ppl/sqkm, proportion)    |          |         | X       |          |         | X       |
| Diarrheal diseases           | Male   | Sanitation (proportion with access)                    | X        |         |         | X        |         |         |
| Diarrheal diseases           | Male   | Improved Water Source (proportion with access)         | X        |         |         | X        |         |         |
| Diarrheal diseases           | Male   | Log-transformed SEV scalar: Diarrhea                   | X        |         |         | X        |         |         |
| Diarrheal diseases           | Male   | SEV unsafe water                                       | X        |         |         | X        |         |         |
| Diarrheal diseases           | Male   | SEV unsafe sanitation                                  | X        |         |         | X        |         |         |
| Diarrheal diseases           | Male   | Socio-demographic Index                                |          |         | X       |          |         | X       |
| Diarrheal diseases           | Male   | Rotavirus coverage (proportion)                        | X        |         |         |          | X       |         |
| Diarrheal diseases           | Male   | Rotavirus coverage (proportion)                        | X        |         |         |          | X       |         |
| Diarrheal diseases           | Female | Education (years per capita)                           |          |         | X       |          |         | X       |
| Diarrheal diseases           | Female | LDI (\$ per capita)                                    |          |         | X       |          |         | X       |
| Diarrheal diseases           | Female | Underweight (proportion <2SD weight for age, <5 years) |          | X       |         | X        |         |         |
| Diarrheal diseases           | Female | Population Density (over 1000 ppl/sqkm, proportion)    |          |         | X       |          |         | X       |
| Diarrheal diseases           | Female | Population Density (under 150 ppl/sqkm, proportion)    |          |         | X       |          |         | X       |
| Diarrheal diseases           | Female | Sanitation (proportion with access)                    | X        |         |         | X        |         |         |
| Diarrheal diseases           | Female | Improved Water Source (proportion with access)         | X        |         |         | X        |         |         |
| Diarrheal diseases           | Female | Log-transformed SEV scalar: Diarrhea                   | X        |         |         | X        |         |         |
| Diarrheal diseases           | Female | SEV unsafe water                                       | X        |         |         | X        |         |         |
| Diarrheal diseases           | Female | SEV unsafe sanitation                                  | X        |         |         | X        |         |         |
| Diarrheal diseases           | Female | Socio-demographic Index                                |          |         | X       |          |         | X       |
| Diarrheal diseases           | Female | Rotavirus coverage (proportion)                        | X        |         |         |          | X       |         |
| Diarrheal diseases           | Female | Rotavirus coverage (proportion)                        | X        |         |         |          | X       |         |
| Lower respiratory infections | Male   | DTP3 Coverage (proportion)                             |          | X       |         |          | X       |         |
| Lower respiratory infections | Male   | Education (years per capita)                           |          |         | X       |          |         | X       |
| Lower respiratory infections | Male   | Hib3 Vaccine Coverage (proportion)                     | X        |         |         | X        |         |         |
| Lower respiratory infections | Male   | LDI (\$ per capita)                                    |          |         | X       |          |         | X       |
| Lower respiratory infections | Male   | Underweight (proportion <2SD weight for age, <5 years) | X        |         |         | X        |         |         |
| Lower respiratory infections | Male   | Indoor Air Pollution (All Cooking Fuels)               | X        |         |         | X        |         |         |
| Lower respiratory infections | Male   | Outdoor Air Pollution (PM2.5)                          |          |         | X       | X        |         |         |
| Lower respiratory infections | Male   | Outdoor Air Pollution (PM2.5)                          |          |         | X       |          | X       |         |
| Lower respiratory infections | Male   | Smoking Prevalence                                     | X        |         |         | X        |         |         |
| Lower respiratory infections | Male   | PCV3 Coverage (proportion)                             | X        |         |         | X        |         |         |
| Lower respiratory infections | Male   | PCV3 Coverage (proportion)                             | X        |         |         |          | X       |         |
| Lower respiratory infections | Male   | PCV3 Coverage (proportion)                             |          | X       |         | X        |         |         |
| Lower respiratory infections | Male   | PCV3 Coverage (proportion)                             |          | X       |         |          | X       |         |
| Lower respiratory infections | Male   | Log-transformed SEV scalar: LRI                        | X        |         |         | X        |         |         |
| Lower respiratory infections | Male   | SEV unsafe sanitation                                  |          |         | X       |          |         | X       |
| Lower respiratory infections | Male   | Socio-demographic Index                                |          |         | X       |          |         | X       |
| Lower respiratory infections | Female | DTP3 Coverage (proportion)                             |          | X       |         |          | X       |         |
| Lower respiratory infections | Female | Education (years per capita)                           |          |         | X       |          |         | X       |
| Lower respiratory infections | Female | Hib3 Vaccine Coverage (proportion)                     | X        |         |         | X        |         |         |
| Lower respiratory infections | Female | LDI (\$ per capita)                                    |          |         | X       |          |         | X       |
| Lower respiratory infections | Female | Underweight (proportion <2SD weight for age, <5 years) | X        |         |         | X        |         |         |
| Lower respiratory infections | Female | Indoor Air Pollution (All Cooking Fuels)               | X        |         |         | X        |         |         |
| Lower respiratory infections | Female | Outdoor Air Pollution (PM2.5)                          |          |         | X       | X        |         |         |
| Lower respiratory infections | Female | Outdoor Air Pollution (PM2.5)                          |          |         | X       |          | X       |         |
| Lower respiratory infections | Female | Smoking Prevalence                                     | X        |         |         | X        |         |         |
| Lower respiratory infections | Female | PCV3 Coverage (proportion)                             | X        |         |         | X        |         |         |
| Lower respiratory infections | Female | PCV3 Coverage (proportion)                             | X        |         |         |          | X       |         |
| Lower respiratory infections | Female | PCV3 Coverage (proportion)                             |          | X       |         | X        |         |         |
| Lower respiratory infections | Female | PCV3 Coverage (proportion)                             |          | X       |         |          | X       |         |
| Lower respiratory infections | Female | Log-transformed SEV scalar: LRI                        | X        |         |         | X        |         |         |
| Lower respiratory infections | Female | SEV unsafe sanitation                                  |          |         | X       |          |         | X       |
| Lower respiratory infections | Female | Socio-demographic Index                                |          |         | X       |          |         | X       |



| Cause        | Sex    | Covariate                                                                                                  | GBD 2015 |         |         | GBD 2016 |         |         |
|--------------|--------|------------------------------------------------------------------------------------------------------------|----------|---------|---------|----------|---------|---------|
|              |        |                                                                                                            | Level 1  | Level 2 | Level 3 | Level 1  | Level 2 | Level 3 |
| Otitis media | Male   | Socio-demographic Index                                                                                    |          |         | X       |          |         | X       |
| Otitis media | Male   | Smoking Prevalence                                                                                         | X        |         |         | X        |         |         |
| Otitis media | Male   | Education (years per capita)                                                                               |          |         | X       |          |         | X       |
| Otitis media | Male   | LDI (I\$ per capita)                                                                                       |          |         | X       |          |         | X       |
| Otitis media | Male   | Outdoor Air Pollution (PM2.5)                                                                              | X        |         |         |          | X       |         |
| Otitis media | Male   | Indoor Air Pollution (All Cooking Fuels)                                                                   | X        |         |         |          | X       |         |
| Otitis media | Male   | Log-transformed SEV scalar: Otitis                                                                         | X        |         |         | X        |         |         |
| Otitis media | Female | Socio-demographic Index                                                                                    |          |         | X       |          |         | X       |
| Otitis media | Female | Smoking Prevalence                                                                                         | X        |         |         | X        |         |         |
| Otitis media | Female | Education (years per capita)                                                                               |          |         | X       |          |         | X       |
| Otitis media | Female | LDI (I\$ per capita)                                                                                       |          |         | X       |          |         | X       |
| Otitis media | Female | Outdoor Air Pollution (PM2.5)                                                                              | X        |         |         |          | X       |         |
| Otitis media | Female | Indoor Air Pollution (All Cooking Fuels)                                                                   | X        |         |         |          | X       |         |
| Otitis media | Female | Log-transformed SEV scalar: Otitis                                                                         | X        |         |         | X        |         |         |
| Meningitis   | Female | DTP3 Coverage (proportion)                                                                                 |          |         | X       |          |         | X       |
| Meningitis   | Female | LDI (I\$ per capita)                                                                                       |          |         | X       |          |         | X       |
| Meningitis   | Female | Underweight (proportion <2SD weight for age, <5 years)                                                     |          | X       |         |          | X       |         |
| Meningitis   | Female | Sanitation (proportion with access)                                                                        |          |         | X       |          |         | X       |
| Meningitis   | Female | Improved Water Source (proportion with access)                                                             |          | X       |         |          | X       |         |
| Meningitis   | Female | Maternal education (years per capita)                                                                      |          |         | X       |          |         | X       |
| Meningitis   | Female | meningitis belt (proportion)                                                                               | X        |         |         | X        |         |         |
| Meningitis   | Female | Socio-demographic Index                                                                                    |          |         | X       |          |         | X       |
| Meningitis   | Female | Proportion of total population covered by menafriavac initiative (meningitis meningococcal type A vaccine) |          |         | X       |          |         | X       |
| Meningitis   | Male   | DTP3 Coverage (proportion)                                                                                 |          |         | X       |          |         | X       |
| Meningitis   | Male   | LDI (I\$ per capita)                                                                                       |          |         | X       |          |         | X       |
| Meningitis   | Male   | Underweight (proportion <2SD weight for age, <5 years)                                                     |          | X       |         |          | X       |         |
| Meningitis   | Male   | Sanitation (proportion with access)                                                                        |          |         | X       |          |         | X       |
| Meningitis   | Male   | Improved Water Source (proportion with access)                                                             |          | X       |         |          | X       |         |
| Meningitis   | Male   | Maternal education (years per capita)                                                                      |          |         | X       |          |         | X       |
| Meningitis   | Male   | meningitis belt (proportion)                                                                               | X        |         |         | X        |         |         |
| Meningitis   | Male   | Socio-demographic Index                                                                                    |          |         | X       |          |         | X       |
| Meningitis   | Male   | Proportion of total population covered by menafriavac initiative (meningitis meningococcal type A vaccine) |          |         | X       |          |         | X       |
| Encephalitis | Female | In-Facility Delivery (proportion)                                                                          |          |         | X       |          |         | X       |
| Encephalitis | Female | LDI (I\$ per capita)                                                                                       |          | X       |         |          | X       |         |
| Encephalitis | Female | Underweight (proportion <2SD weight for age, <5 years)                                                     | X        |         |         | X        |         |         |
| Encephalitis | Female | Sanitation (proportion with access)                                                                        |          |         | X       |          |         | X       |
| Encephalitis | Female | Improved Water Source (proportion with access)                                                             |          |         | X       |          |         | X       |
| Encephalitis | Female | Maternal education (years per capita)                                                                      |          |         | X       |          |         | X       |
| Encephalitis | Female | Socio-demographic Index                                                                                    |          |         | X       |          |         | X       |
| Encephalitis | Female | Japanese encephalitis endemic area (binary)                                                                | X        |         |         | X        |         |         |
| Encephalitis | Male   | In-Facility Delivery (proportion)                                                                          |          |         | X       |          |         | X       |
| Encephalitis | Male   | LDI (I\$ per capita)                                                                                       |          | X       |         |          | X       |         |
| Encephalitis | Male   | Underweight (proportion <2SD weight for age, <5 years)                                                     | X        |         |         | X        |         |         |
| Encephalitis | Male   | Sanitation (proportion with access)                                                                        |          |         | X       |          |         | X       |
| Encephalitis | Male   | Improved Water Source (proportion with access)                                                             |          |         | X       |          |         | X       |
| Encephalitis | Male   | Maternal education (years per capita)                                                                      |          |         | X       |          |         | X       |
| Encephalitis | Male   | Socio-demographic Index                                                                                    |          |         | X       |          |         | X       |
| Encephalitis | Male   | Japanese encephalitis endemic area (binary)                                                                | X        |         |         | X        |         |         |
| Tetanus      | Male   | Socio-demographic Index                                                                                    |          |         | X       |          |         | X       |
| Tetanus      | Male   | Sanitation (proportion with access)                                                                        |          |         | X       |          |         | X       |
| Tetanus      | Male   | Education (years per capita)                                                                               |          |         | X       |          |         | X       |
| Tetanus      | Male   | DTP3 Coverage (proportion)                                                                                 | X        |         |         | X        |         |         |
| Tetanus      | Male   | LDI (I\$ per capita)                                                                                       |          |         | X       |          |         | X       |
| Tetanus      | Female | Socio-demographic Index                                                                                    |          |         | X       |          |         | X       |
| Tetanus      | Female | Sanitation (proportion with access)                                                                        |          |         | X       |          |         | X       |
| Tetanus      | Female | Education (years per capita)                                                                               |          |         | X       |          |         | X       |
| Tetanus      | Female | DTP3 Coverage (proportion)                                                                                 | X        |         |         | X        |         |         |
| Tetanus      | Female | LDI (I\$ per capita)                                                                                       |          |         | X       |          |         | X       |
| Tetanus      | Male   | Skilled Birth Attendance (proportion)                                                                      |          | X       |         |          | X       |         |
| Tetanus      | Male   | In-Facility Delivery (proportion)                                                                          |          | X       |         |          | X       |         |
| Tetanus      | Male   | Tetanus Toxoid Coverage Smooth (proportion)                                                                | X        |         |         | X        |         |         |
| Tetanus      | Female | Skilled Birth Attendance (proportion)                                                                      |          | X       |         |          | X       |         |
| Tetanus      | Female | In-Facility Delivery (proportion)                                                                          |          | X       |         |          | X       |         |
| Tetanus      | Female | Tetanus Toxoid Coverage Smooth (proportion)                                                                | X        |         |         | X        |         |         |
| Dengue       | Female | Education (years per capita)                                                                               |          |         | X       |          |         | X       |
| Dengue       | Female | Health System Access (unitless)                                                                            |          | X       |         |          | X       |         |
| Dengue       | Female | LDI (I\$ per capita)                                                                                       |          |         | X       |          |         | X       |
| Dengue       | Female | Latitude Under 15 (proportion)                                                                             |          | X       |         |          | X       |         |
| Dengue       | Female | Population Density (over 1000 ppl/sqkm, proportion)                                                        | X        |         |         | X        |         |         |
| Dengue       | Female | Elevation Under 100m (proportion)                                                                          |          | X       |         |          | X       |         |
| Dengue       | Female | Rainfall Quintile 4 (proportion)                                                                           |          | X       |         |          | X       |         |
| Dengue       | Female | Rainfall Quintile 5 (proportion)                                                                           |          | X       |         |          | X       |         |
| Dengue       | Female | Population weighted probability of dengue transmission                                                     | X        |         |         | X        |         |         |
| Dengue       | Female | Dengue outbreaks (binary)                                                                                  |          | X       |         |          | X       |         |
| Dengue       | Female | Dengue anomalies (deviation from mean dengue incidence rate)                                               |          | X       |         |          | X       |         |
| Dengue       | Female | Dengue anomalies (deviation from mean dengue incidence rate)                                               |          | X       |         | X        |         |         |
| Dengue       | Female | Socio-demographic Index                                                                                    |          |         | X       |          |         | X       |
| Dengue       | Male   | Education (years per capita)                                                                               |          |         | X       |          |         | X       |
| Dengue       | Male   | Health System Access (unitless)                                                                            |          | X       |         |          | X       |         |
| Dengue       | Male   | LDI (I\$ per capita)                                                                                       |          |         | X       |          |         | X       |
| Dengue       | Male   | Latitude Under 15 (proportion)                                                                             |          | X       |         |          | X       |         |
| Dengue       | Male   | Population Density (over 1000 ppl/sqkm, proportion)                                                        | X        |         |         | X        |         |         |
| Dengue       | Male   | Elevation Under 100m (proportion)                                                                          |          | X       |         |          | X       |         |
| Dengue       | Male   | Rainfall Quintile 4 (proportion)                                                                           |          | X       |         |          | X       |         |

| Cause                                                    | Sex    | Covariate                                                    | GBD 2015 |         |         | GBD 2016 |         |         |
|----------------------------------------------------------|--------|--------------------------------------------------------------|----------|---------|---------|----------|---------|---------|
|                                                          |        |                                                              | Level 1  | Level 2 | Level 3 | Level 1  | Level 2 | Level 3 |
| Dengue                                                   | Male   | Rainfall Quintile 5 (proportion)                             |          | X       |         |          | X       |         |
| Dengue                                                   | Male   | Population weighted probability of dengue transmission       | X        |         |         | X        |         |         |
| Dengue                                                   | Male   | Dengue outbreaks (binary)                                    |          | X       |         |          | X       |         |
| Dengue                                                   | Male   | Dengue anomalies (deviation from mean dengue incidence rate) |          | X       |         |          | X       |         |
| Dengue                                                   | Male   | Dengue anomalies (deviation from mean dengue incidence rate) |          | X       |         | X        |         |         |
| Dengue                                                   | Male   | Socio-demographic Index                                      |          |         | X       |          |         | X       |
| Rabies                                                   | Male   | Antenatal Care (4 visits) Coverage (proportion)              | X        |         |         | X        |         |         |
| Rabies                                                   | Male   | Health System Access (unitless)                              | X        |         |         | X        |         |         |
| Rabies                                                   | Male   | Health System Access (unitless)                              | X        |         |         |          | X       |         |
| Rabies                                                   | Male   | In-Facility Delivery (proportion)                            | X        |         |         | X        |         |         |
| Rabies                                                   | Male   | Population Density (500-1000 ppl/sqkm, proportion)           |          |         | X       |          |         | X       |
| Rabies                                                   | Male   | Population Density (under 150 ppl/sqkm, proportion)          |          |         | X       |          |         | X       |
| Rabies                                                   | Male   | Skilled Birth Attendance (proportion)                        |          | X       |         |          | X       |         |
| Rabies                                                   | Male   | Socio-demographic Index                                      |          |         | X       |          |         | X       |
| Rabies                                                   | Female | Antenatal Care (4 visits) Coverage (proportion)              | X        |         |         | X        |         |         |
| Rabies                                                   | Female | Health System Access (unitless)                              | X        |         |         | X        |         |         |
| Rabies                                                   | Female | Health System Access (unitless)                              | X        |         |         |          | X       |         |
| Rabies                                                   | Female | In-Facility Delivery (proportion)                            | X        |         |         | X        |         |         |
| Rabies                                                   | Female | Population Density (500-1000 ppl/sqkm, proportion)           |          |         | X       |          |         | X       |
| Rabies                                                   | Female | Population Density (under 150 ppl/sqkm, proportion)          |          |         | X       |          |         | X       |
| Rabies                                                   | Female | Skilled Birth Attendance (proportion)                        |          | X       |         |          | X       |         |
| Rabies                                                   | Female | Socio-demographic Index                                      |          |         | X       |          |         | X       |
| Other neglected tropical diseases                        | Male   | Socio-demographic Index                                      |          |         | X       |          |         | X       |
| Other neglected tropical diseases                        | Male   | Sanitation (proportion with access)                          |          | X       |         |          | X       |         |
| Other neglected tropical diseases                        | Male   | Education (years per capita)                                 |          |         | X       |          |         | X       |
| Other neglected tropical diseases                        | Male   | LDI (US\$ per capita)                                        |          |         | X       |          |         | X       |
| Other neglected tropical diseases                        | Male   | Rainfall Quintile 5 (proportion)                             |          | X       |         |          | X       |         |
| Other neglected tropical diseases                        | Male   | Latitude Under 15 (proportion)                               | X        |         |         | X        |         |         |
| Other neglected tropical diseases                        | Female | Socio-demographic Index                                      |          |         | X       |          |         | X       |
| Other neglected tropical diseases                        | Female | Sanitation (proportion with access)                          |          | X       |         |          | X       |         |
| Other neglected tropical diseases                        | Female | Education (years per capita)                                 |          |         | X       |          |         | X       |
| Other neglected tropical diseases                        | Female | LDI (US\$ per capita)                                        |          |         | X       |          |         | X       |
| Other neglected tropical diseases                        | Female | Rainfall Quintile 5 (proportion)                             |          | X       |         |          | X       |         |
| Other neglected tropical diseases                        | Female | Latitude Under 15 (proportion)                               | X        |         |         | X        |         |         |
| Neonatal disorders                                       | Female | Education (years per capita)                                 |          | X       |         |          |         | X       |
| Neonatal disorders                                       | Female | In-Facility Delivery (proportion)                            |          | X       |         |          | X       |         |
| Neonatal disorders                                       | Female | LDI (US\$ per capita)                                        |          | X       |         |          |         | X       |
| Neonatal disorders                                       | Female | Underweight (proportion <2SD weight for age, <5 years)       |          | X       |         |          | X       |         |
| Neonatal disorders                                       | Female | Indoor Air Pollution (All Cooking Fuels)                     | X        |         |         | X        |         |         |
| Neonatal disorders                                       | Female | Smoking Prevalence (Reproductive Age Standardized)           | X        |         |         | X        |         |         |
| Neonatal disorders                                       | Female | Total Fertility Rate                                         |          |         | X       |          |         | X       |
| Neonatal disorders                                       | Female | Socio-demographic Index                                      |          |         | X       |          |         | X       |
| Neonatal disorders                                       | Male   | Education (years per capita)                                 |          | X       |         |          |         | X       |
| Neonatal disorders                                       | Male   | In-Facility Delivery (proportion)                            |          | X       |         |          | X       |         |
| Neonatal disorders                                       | Male   | LDI (US\$ per capita)                                        |          | X       |         |          |         | X       |
| Neonatal disorders                                       | Male   | Underweight (proportion <2SD weight for age, <5 years)       |          | X       |         |          | X       |         |
| Neonatal disorders                                       | Male   | Indoor Air Pollution (All Cooking Fuels)                     | X        |         |         | X        |         |         |
| Neonatal disorders                                       | Male   | Smoking Prevalence (Reproductive Age Standardized)           | X        |         |         | X        |         |         |
| Neonatal disorders                                       | Male   | Total Fertility Rate                                         |          |         | X       |          |         | X       |
| Neonatal disorders                                       | Male   | Socio-demographic Index                                      |          |         | X       |          |         | X       |
| Neonatal preterm birth complications                     | Male   | Education (years per capita)                                 |          |         | X       |          |         | X       |
| Neonatal preterm birth complications                     | Male   | In-Facility Delivery (proportion)                            |          | X       |         |          | X       |         |
| Neonatal preterm birth complications                     | Male   | In-Facility Delivery (proportion)                            | X        |         |         |          | X       |         |
| Neonatal preterm birth complications                     | Male   | LDI (US\$ per capita)                                        |          |         | X       |          |         | X       |
| Neonatal preterm birth complications                     | Male   | Underweight (proportion <2SD weight for age, <5 years)       |          | X       |         |          | X       |         |
| Neonatal preterm birth complications                     | Male   | Live Births 35+ (proportion)                                 |          | X       |         |          | X       |         |
| Neonatal preterm birth complications                     | Male   | Indoor Air Pollution (All Cooking Fuels)                     | X        |         |         | X        |         |         |
| Neonatal preterm birth complications                     | Male   | Smoking Prevalence (Reproductive Age Standardized)           | X        |         |         | X        |         |         |
| Neonatal preterm birth complications                     | Male   | Total Fertility Rate                                         |          |         | X       |          |         | X       |
| Neonatal preterm birth complications                     | Male   | Socio-demographic Index                                      |          |         | X       |          |         | X       |
| Neonatal preterm birth complications                     | Female | Education (years per capita)                                 |          |         | X       |          |         | X       |
| Neonatal preterm birth complications                     | Female | In-Facility Delivery (proportion)                            |          | X       |         |          | X       |         |
| Neonatal preterm birth complications                     | Female | LDI (US\$ per capita)                                        |          |         | X       |          |         | X       |
| Neonatal preterm birth complications                     | Female | Underweight (proportion <2SD weight for age, <5 years)       |          | X       |         |          | X       |         |
| Neonatal preterm birth complications                     | Female | Live Births 35+ (proportion)                                 |          | X       |         |          | X       |         |
| Neonatal preterm birth complications                     | Female | Indoor Air Pollution (All Cooking Fuels)                     | X        |         |         | X        |         |         |
| Neonatal preterm birth complications                     | Female | Smoking Prevalence (Reproductive Age Standardized)           | X        |         |         | X        |         |         |
| Neonatal preterm birth complications                     | Female | Total Fertility Rate                                         |          |         | X       |          |         | X       |
| Neonatal preterm birth complications                     | Female | Socio-demographic Index                                      |          |         | X       |          |         | X       |
| Neonatal encephalopathy due to birth asphyxia and trauma | Male   | Education (years per capita)                                 |          |         | X       |          |         | X       |
| Neonatal encephalopathy due to birth asphyxia and trauma | Male   | In-Facility Delivery (proportion)                            |          | X       |         |          | X       |         |
| Neonatal encephalopathy due to birth asphyxia and trauma | Male   | LDI (US\$ per capita)                                        |          |         | X       |          |         | X       |
| Neonatal encephalopathy due to birth asphyxia and trauma | Male   | Underweight (proportion <2SD weight for age, <5 years)       |          | X       |         |          | X       |         |
| Neonatal encephalopathy due to birth asphyxia and trauma | Male   | Indoor Air Pollution (All Cooking Fuels)                     | X        |         |         | X        |         |         |
| Neonatal encephalopathy due to birth asphyxia and trauma | Male   | Smoking Prevalence (Reproductive Age Standardized)           | X        |         |         | X        |         |         |
| Neonatal encephalopathy due to birth asphyxia and trauma | Male   | Total Fertility Rate                                         |          |         | X       |          |         | X       |
| Neonatal encephalopathy due to birth asphyxia and trauma | Male   | Socio-demographic Index                                      |          |         | X       |          |         | X       |
| Neonatal encephalopathy due to birth asphyxia and trauma | Female | Education (years per capita)                                 |          |         | X       |          |         | X       |
| Neonatal encephalopathy due to birth asphyxia and trauma | Female | In-Facility Delivery (proportion)                            |          | X       |         |          | X       |         |
| Neonatal encephalopathy due to birth asphyxia and trauma | Female | LDI (US\$ per capita)                                        |          |         | X       |          |         | X       |
| Neonatal encephalopathy due to birth asphyxia and trauma | Female | Underweight (proportion <2SD weight for age, <5 years)       |          | X       |         |          | X       |         |
| Neonatal encephalopathy due to birth asphyxia and trauma | Female | Indoor Air Pollution (All Cooking Fuels)                     | X        |         |         | X        |         |         |
| Neonatal encephalopathy due to birth asphyxia and trauma | Female | Smoking Prevalence (Reproductive Age Standardized)           | X        |         |         | X        |         |         |
| Neonatal encephalopathy due to birth asphyxia and trauma | Female | Total Fertility Rate                                         |          |         | X       |          |         | X       |
| Neonatal encephalopathy due to birth asphyxia and trauma | Female | Socio-demographic Index                                      |          |         | X       |          |         | X       |

| Cause                                         | Sex    | Covariate                                              | GBD 2015 |         |         | GBD 2016 |         |         |
|-----------------------------------------------|--------|--------------------------------------------------------|----------|---------|---------|----------|---------|---------|
|                                               |        |                                                        | Level 1  | Level 2 | Level 3 | Level 1  | Level 2 | Level 3 |
| Neonatal sepsis and other neonatal infections | Male   | Education (years per capita)                           |          |         | X       |          |         | X       |
| Neonatal sepsis and other neonatal infections | Male   | In-Facility Delivery (proportion)                      |          | X       |         |          | X       |         |
| Neonatal sepsis and other neonatal infections | Male   | LDI (IS per capita)                                    |          |         | X       |          |         | X       |
| Neonatal sepsis and other neonatal infections | Male   | Underweight (proportion <2SD weight for age, <5 years) |          | X       |         |          | X       |         |
| Neonatal sepsis and other neonatal infections | Male   | Indoor Air Pollution (All Cooking Fuels)               | X        |         |         | X        |         |         |
| Neonatal sepsis and other neonatal infections | Male   | Smoking Prevalence (Reproductive Age Standardized)     | X        |         |         | X        |         |         |
| Neonatal sepsis and other neonatal infections | Male   | Total Fertility Rate                                   |          |         | X       |          |         | X       |
| Neonatal sepsis and other neonatal infections | Male   | Socio-demographic Index                                |          |         | X       |          |         | X       |
| Neonatal sepsis and other neonatal infections | Female | Education (years per capita)                           |          |         | X       |          |         | X       |
| Neonatal sepsis and other neonatal infections | Female | In-Facility Delivery (proportion)                      |          | X       |         |          | X       |         |
| Neonatal sepsis and other neonatal infections | Female | LDI (IS per capita)                                    |          |         | X       |          |         | X       |
| Neonatal sepsis and other neonatal infections | Female | Underweight (proportion <2SD weight for age, <5 years) |          | X       |         |          | X       |         |
| Neonatal sepsis and other neonatal infections | Female | Indoor Air Pollution (All Cooking Fuels)               | X        |         |         | X        |         |         |
| Neonatal sepsis and other neonatal infections | Female | Smoking Prevalence (Reproductive Age Standardized)     | X        |         |         | X        |         |         |
| Neonatal sepsis and other neonatal infections | Female | Total Fertility Rate                                   |          |         | X       |          |         | X       |
| Neonatal sepsis and other neonatal infections | Female | Socio-demographic Index                                |          |         | X       |          |         | X       |
| Hemolytic disease and other neonatal jaundice | Male   | Antenatal Care (4 visits) Coverage (proportion)        |          | X       |         |          | X       |         |
| Hemolytic disease and other neonatal jaundice | Male   | Education (years per capita)                           |          |         | X       |          |         | X       |
| Hemolytic disease and other neonatal jaundice | Male   | In-Facility Delivery (proportion)                      |          | X       |         |          | X       |         |
| Hemolytic disease and other neonatal jaundice | Male   | LDI (IS per capita)                                    |          |         | X       |          |         | X       |
| Hemolytic disease and other neonatal jaundice | Male   | Skilled Birth Attendance (proportion)                  |          | X       |         |          | X       |         |
| Hemolytic disease and other neonatal jaundice | Male   | Total Fertility Rate                                   |          | X       |         |          |         | X       |
| Hemolytic disease and other neonatal jaundice | Male   | Socio-demographic Index                                |          |         | X       |          |         | X       |
| Hemolytic disease and other neonatal jaundice | Female | Antenatal Care (4 visits) Coverage (proportion)        |          | X       |         |          | X       |         |
| Hemolytic disease and other neonatal jaundice | Female | Education (years per capita)                           |          |         | X       |          |         | X       |
| Hemolytic disease and other neonatal jaundice | Female | In-Facility Delivery (proportion)                      |          | X       |         |          | X       |         |
| Hemolytic disease and other neonatal jaundice | Female | LDI (IS per capita)                                    |          |         | X       |          |         | X       |
| Hemolytic disease and other neonatal jaundice | Female | Skilled Birth Attendance (proportion)                  |          | X       |         |          | X       |         |
| Hemolytic disease and other neonatal jaundice | Female | Total Fertility Rate                                   |          | X       |         |          |         | X       |
| Hemolytic disease and other neonatal jaundice | Female | Socio-demographic Index                                |          |         | X       |          |         | X       |
| Other neonatal disorders                      | Female | Education (years per capita)                           |          |         | X       |          |         | X       |
| Other neonatal disorders                      | Female | LDI (IS per capita)                                    |          |         | X       |          |         | X       |
| Other neonatal disorders                      | Female | Underweight (proportion <2SD weight for age, <5 years) |          | X       |         |          | X       |         |
| Other neonatal disorders                      | Female | Indoor Air Pollution (All Cooking Fuels)               | X        |         |         | X        |         |         |
| Other neonatal disorders                      | Female | Skilled Birth Attendance (proportion)                  |          | X       |         |          | X       |         |
| Other neonatal disorders                      | Female | Smoking Prevalence (Reproductive Age Standardized)     | X        |         |         | X        |         |         |
| Other neonatal disorders                      | Female | Total Fertility Rate                                   |          |         | X       |          |         | X       |
| Other neonatal disorders                      | Female | Socio-demographic Index                                |          |         | X       |          |         | X       |
| Other neonatal disorders                      | Male   | Education (years per capita)                           |          |         | X       |          |         | X       |
| Other neonatal disorders                      | Male   | LDI (IS per capita)                                    |          |         | X       |          |         | X       |
| Other neonatal disorders                      | Male   | Underweight (proportion <2SD weight for age, <5 years) |          | X       |         |          | X       |         |
| Other neonatal disorders                      | Male   | Indoor Air Pollution (All Cooking Fuels)               | X        |         |         | X        |         |         |
| Other neonatal disorders                      | Male   | Skilled Birth Attendance (proportion)                  |          | X       |         |          | X       |         |
| Other neonatal disorders                      | Male   | Smoking Prevalence (Reproductive Age Standardized)     | X        |         |         | X        |         |         |
| Other neonatal disorders                      | Male   | Total Fertility Rate                                   |          |         | X       |          |         | X       |
| Other neonatal disorders                      | Male   | Socio-demographic Index                                |          |         | X       |          |         | X       |
| Nutritional deficiencies                      | Male   | Education (years per capita)                           |          |         | X       |          |         | X       |
| Nutritional deficiencies                      | Male   | LDI (IS per capita)                                    |          |         | X       |          |         | X       |
| Nutritional deficiencies                      | Male   | Underweight (proportion <2SD weight for age, <5 years) | X        |         |         | X        |         |         |
| Nutritional deficiencies                      | Male   | Rainfall Quintile 1 (proportion)                       |          | X       |         |          | X       |         |
| Nutritional deficiencies                      | Male   | Rainfall Quintile 2 (proportion)                       |          | X       |         |          | X       |         |
| Nutritional deficiencies                      | Male   | Sanitation (proportion with access)                    |          | X       |         |          | X       |         |
| Nutritional deficiencies                      | Male   | Mortality Rate Due to War Shocks (per 1 person)        |          | X       |         |          | X       |         |
| Nutritional deficiencies                      | Male   | Improved Water Source (proportion with access)         |          | X       |         |          | X       |         |
| Nutritional deficiencies                      | Male   | Age-Standardize Prevalence of Severe Anemia            | X        |         |         | X        |         |         |
| Nutritional deficiencies                      | Male   | Socio-demographic Index                                |          |         | X       |          |         | X       |
| Nutritional deficiencies                      | Female | Education (years per capita)                           |          |         | X       |          |         | X       |
| Nutritional deficiencies                      | Female | LDI (IS per capita)                                    |          |         | X       |          |         | X       |
| Nutritional deficiencies                      | Female | Underweight (proportion <2SD weight for age, <5 years) | X        |         |         | X        |         |         |
| Nutritional deficiencies                      | Female | Rainfall Quintile 1 (proportion)                       |          | X       |         |          | X       |         |
| Nutritional deficiencies                      | Female | Rainfall Quintile 2 (proportion)                       |          | X       |         |          | X       |         |
| Nutritional deficiencies                      | Female | Sanitation (proportion with access)                    |          | X       |         |          | X       |         |
| Nutritional deficiencies                      | Female | Mortality Rate Due to War Shocks (per 1 person)        |          | X       |         |          | X       |         |
| Nutritional deficiencies                      | Female | Improved Water Source (proportion with access)         |          | X       |         |          | X       |         |
| Nutritional deficiencies                      | Female | Age-Standardize Prevalence of Severe Anemia            | X        |         |         | X        |         |         |
| Nutritional deficiencies                      | Female | Socio-demographic Index                                |          |         | X       |          |         | X       |
| Protein-energy malnutrition                   | Male   | Education (years per capita)                           |          |         | X       |          |         | X       |
| Protein-energy malnutrition                   | Male   | LDI (IS per capita)                                    |          |         | X       |          |         | X       |
| Protein-energy malnutrition                   | Male   | Rainfall Quintile 1 (proportion)                       |          | X       |         |          | X       |         |
| Protein-energy malnutrition                   | Male   | Rainfall Quintile 2 (proportion)                       |          | X       |         |          | X       |         |
| Protein-energy malnutrition                   | Male   | Sanitation (proportion with access)                    |          | X       |         |          | X       |         |
| Protein-energy malnutrition                   | Male   | Mortality Rate Due to War Shocks (per 1 person)        |          | X       |         |          | X       |         |
| Protein-energy malnutrition                   | Male   | Improved Water Source (proportion with access)         |          | X       |         |          | X       |         |
| Protein-energy malnutrition                   | Male   | Age-Standardize Prevalence of Severe Anemia            | X        |         |         | X        |         |         |
| Protein-energy malnutrition                   | Male   | Socio-demographic Index                                |          |         | X       |          |         | X       |
| Protein-energy malnutrition                   | Female | Education (years per capita)                           |          |         | X       |          |         | X       |
| Protein-energy malnutrition                   | Female | LDI (IS per capita)                                    |          |         | X       |          |         | X       |
| Protein-energy malnutrition                   | Female | Rainfall Quintile 1 (proportion)                       |          | X       |         |          | X       |         |
| Protein-energy malnutrition                   | Female | Rainfall Quintile 2 (proportion)                       |          | X       |         |          | X       |         |
| Protein-energy malnutrition                   | Female | Sanitation (proportion with access)                    |          | X       |         |          | X       |         |
| Protein-energy malnutrition                   | Female | Mortality Rate Due to War Shocks (per 1 person)        |          | X       |         |          | X       |         |
| Protein-energy malnutrition                   | Female | Improved Water Source (proportion with access)         |          | X       |         |          | X       |         |
| Protein-energy malnutrition                   | Female | Age-Standardize Prevalence of Severe Anemia            | X        |         |         | X        |         |         |
| Protein-energy malnutrition                   | Female | Socio-demographic Index                                |          |         | X       |          |         | X       |
| Iron-deficiency anemia                        | Male   | Education (years per capita)                           |          |         | X       |          |         | X       |

| Cause                                       | Sex    | Covariate                                              | GBD 2015 |         |         | GBD 2016 |         |         |
|---------------------------------------------|--------|--------------------------------------------------------|----------|---------|---------|----------|---------|---------|
|                                             |        |                                                        | Level 1  | Level 2 | Level 3 | Level 1  | Level 2 | Level 3 |
| Iron-deficiency anemia                      | Male   | Health System Access 2 (unitless)                      | X        |         |         |          | X       |         |
| Iron-deficiency anemia                      | Male   | LDI (1\$ per capita)                                   |          |         | X       |          |         | X       |
| Iron-deficiency anemia                      | Male   | Underweight (proportion <2SD weight for age, <5 years) | X        |         |         | X        |         |         |
| Iron-deficiency anemia                      | Male   | Rainfall Quintile 1 (proportion)                       |          | X       |         |          | X       |         |
| Iron-deficiency anemia                      | Male   | Rainfall Quintile 2 (proportion)                       |          | X       |         |          | X       |         |
| Iron-deficiency anemia                      | Male   | Sanitation (proportion with access)                    |          | X       |         |          | X       |         |
| Iron-deficiency anemia                      | Male   | Total Calories (kcal per capita)                       |          | X       |         |          | X       |         |
| Iron-deficiency anemia                      | Male   | Improved Water Source (proportion with access)         |          | X       |         |          | X       |         |
| Iron-deficiency anemia                      | Male   | Age-Standardize Prevalence of Severe Anemia            | X        |         |         | X        |         |         |
| Iron-deficiency anemia                      | Male   | Socio-demographic Index                                |          |         | X       |          |         | X       |
| Iron-deficiency anemia                      | Female | Education (years per capita)                           |          |         | X       |          |         | X       |
| Iron-deficiency anemia                      | Female | Health System Access 2 (unitless)                      | X        |         |         |          | X       |         |
| Iron-deficiency anemia                      | Female | LDI (1\$ per capita)                                   |          |         | X       |          |         | X       |
| Iron-deficiency anemia                      | Female | Underweight (proportion <2SD weight for age, <5 years) | X        |         |         | X        |         |         |
| Iron-deficiency anemia                      | Female | Rainfall Quintile 1 (proportion)                       |          | X       |         |          | X       |         |
| Iron-deficiency anemia                      | Female | Rainfall Quintile 2 (proportion)                       |          | X       |         |          | X       |         |
| Iron-deficiency anemia                      | Female | Sanitation (proportion with access)                    |          | X       |         |          | X       |         |
| Iron-deficiency anemia                      | Female | Total Calories (kcal per capita)                       |          | X       |         |          | X       |         |
| Iron-deficiency anemia                      | Female | Improved Water Source (proportion with access)         |          | X       |         |          | X       |         |
| Iron-deficiency anemia                      | Female | Age-Standardize Prevalence of Severe Anemia            | X        |         |         | X        |         |         |
| Iron-deficiency anemia                      | Female | Socio-demographic Index                                |          |         | X       |          |         | X       |
| Other nutritional deficiencies              | Male   | Education (years per capita)                           |          |         | X       |          |         | X       |
| Other nutritional deficiencies              | Male   | LDI (1\$ per capita)                                   |          |         | X       |          |         | X       |
| Other nutritional deficiencies              | Male   | Underweight (proportion <2SD weight for age, <5 years) | X        |         |         | X        |         |         |
| Other nutritional deficiencies              | Male   | Rainfall Quintile 1 (proportion)                       |          | X       |         |          | X       |         |
| Other nutritional deficiencies              | Male   | Rainfall Quintile 2 (proportion)                       |          | X       |         |          | X       |         |
| Other nutritional deficiencies              | Male   | Sanitation (proportion with access)                    |          | X       |         |          | X       |         |
| Other nutritional deficiencies              | Male   | Mortality Rate Due to War Shocks (per 1 person)        |          | X       |         |          | X       |         |
| Other nutritional deficiencies              | Male   | Improved Water Source (proportion with access)         |          | X       |         |          | X       |         |
| Other nutritional deficiencies              | Male   | Age-Standardize Prevalence of Severe Anemia            | X        |         |         | X        |         |         |
| Other nutritional deficiencies              | Male   | Socio-demographic Index                                |          |         | X       |          |         | X       |
| Other nutritional deficiencies              | Female | Education (years per capita)                           |          |         | X       |          |         | X       |
| Other nutritional deficiencies              | Female | LDI (1\$ per capita)                                   |          |         | X       |          |         | X       |
| Other nutritional deficiencies              | Female | Underweight (proportion <2SD weight for age, <5 years) | X        |         |         | X        |         |         |
| Other nutritional deficiencies              | Female | Rainfall Quintile 1 (proportion)                       |          | X       |         |          | X       |         |
| Other nutritional deficiencies              | Female | Rainfall Quintile 2 (proportion)                       |          | X       |         |          | X       |         |
| Other nutritional deficiencies              | Female | Sanitation (proportion with access)                    |          | X       |         |          | X       |         |
| Other nutritional deficiencies              | Female | Mortality Rate Due to War Shocks (per 1 person)        |          | X       |         |          | X       |         |
| Other nutritional deficiencies              | Female | Improved Water Source (proportion with access)         |          | X       |         |          | X       |         |
| Other nutritional deficiencies              | Female | Age-Standardize Prevalence of Severe Anemia            | X        |         |         | X        |         |         |
| Other nutritional deficiencies              | Female | Socio-demographic Index                                |          |         | X       |          |         | X       |
| Sexually transmitted diseases excluding HIV | Female | Legality of Abortion                                   |          | X       |         |          | X       |         |
| Sexually transmitted diseases excluding HIV | Female | Antenatal Care (1 visit) Coverage (proportion)         |          |         | X       |          |         | X       |
| Sexually transmitted diseases excluding HIV | Female | Antenatal Care (4 visits) Coverage (proportion)        |          |         | X       |          |         | X       |
| Sexually transmitted diseases excluding HIV | Female | Age-Specific Fertility Rate                            |          | X       |         |          | X       |         |
| Sexually transmitted diseases excluding HIV | Female | Education (years per capita)                           |          | X       |         |          | X       |         |
| Sexually transmitted diseases excluding HIV | Female | LDI (1\$ per capita)                                   |          |         | X       |          |         | X       |
| Sexually transmitted diseases excluding HIV | Female | Total Fertility Rate                                   |          | X       |         |          | X       |         |
| Sexually transmitted diseases excluding HIV | Female | Health System Access (capped)                          |          | X       |         |          | X       |         |
| Sexually transmitted diseases excluding HIV | Female | Syphilis prevalence (proportion)                       | X        |         |         | X        |         |         |
| Sexually transmitted diseases excluding HIV | Male   | Legality of Abortion                                   |          | X       |         |          | X       |         |
| Sexually transmitted diseases excluding HIV | Male   | Antenatal Care (1 visit) Coverage (proportion)         |          |         | X       |          |         | X       |
| Sexually transmitted diseases excluding HIV | Male   | Antenatal Care (4 visits) Coverage (proportion)        |          |         | X       |          |         | X       |
| Sexually transmitted diseases excluding HIV | Male   | Age-Specific Fertility Rate                            |          | X       |         |          | X       |         |
| Sexually transmitted diseases excluding HIV | Male   | Education (years per capita)                           |          | X       |         |          | X       |         |
| Sexually transmitted diseases excluding HIV | Male   | LDI (1\$ per capita)                                   |          |         | X       |          |         | X       |
| Sexually transmitted diseases excluding HIV | Male   | Total Fertility Rate                                   |          | X       |         |          | X       |         |
| Sexually transmitted diseases excluding HIV | Male   | Health System Access (capped)                          |          | X       |         |          | X       |         |
| Sexually transmitted diseases excluding HIV | Male   | Syphilis prevalence (proportion)                       | X        |         |         | X        |         |         |
| Hepatitis                                   | Male   | Education (years per capita)                           |          |         | X       |          |         | X       |
| Hepatitis                                   | Male   | Health System Access 2 (unitless)                      |          | X       |         |          | X       |         |
| Hepatitis                                   | Male   | LDI (1\$ per capita)                                   |          | X       |         |          | X       |         |
| Hepatitis                                   | Male   | Sanitation (proportion with access)                    |          | X       |         |          | X       |         |
| Hepatitis                                   | Male   | Improved Water Source (proportion with access)         |          | X       |         |          | X       |         |
| Hepatitis                                   | Male   | Log-transformed SEV scalar: Hep                        | X        |         |         | X        |         |         |
| Hepatitis                                   | Male   | Socio-demographic Index                                |          |         | X       |          |         | X       |
| Hepatitis                                   | Male   | Hepatitis B (HBsAg) Seroprevalence                     | X        |         |         | X        |         |         |
| Hepatitis                                   | Male   | Hepatitis C (IgG) Seroprevalence                       | X        |         |         | X        |         |         |
| Hepatitis                                   | Male   | Seroprevalence of anti-HAV (IgG)                       | X        |         |         | X        |         |         |
| Hepatitis                                   | Male   | Seroprevalence of anti-HEV (IgG)                       | X        |         |         | X        |         |         |
| Hepatitis                                   | Female | Education (years per capita)                           |          |         | X       |          |         | X       |
| Hepatitis                                   | Female | Health System Access 2 (unitless)                      |          | X       |         |          | X       |         |
| Hepatitis                                   | Female | LDI (1\$ per capita)                                   |          | X       |         |          | X       |         |
| Hepatitis                                   | Female | Sanitation (proportion with access)                    |          | X       |         |          | X       |         |
| Hepatitis                                   | Female | Improved Water Source (proportion with access)         |          | X       |         |          | X       |         |
| Hepatitis                                   | Female | Log-transformed SEV scalar: Hep                        | X        |         |         | X        |         |         |
| Hepatitis                                   | Female | Socio-demographic Index                                |          |         | X       |          |         | X       |
| Hepatitis                                   | Female | Hepatitis B (HBsAg) Seroprevalence                     | X        |         |         | X        |         |         |
| Hepatitis                                   | Female | Hepatitis C (IgG) Seroprevalence                       | X        |         |         | X        |         |         |
| Hepatitis                                   | Female | Seroprevalence of anti-HAV (IgG)                       | X        |         |         | X        |         |         |
| Hepatitis                                   | Female | Seroprevalence of anti-HEV (IgG)                       | X        |         |         | X        |         |         |
| Other infectious diseases                   | Male   | Underweight (proportion <2SD weight for age, <5 years) |          | X       |         |          | X       |         |
| Other infectious diseases                   | Male   | Underweight (proportion <2SD weight for age, <5 years) |          | X       |         |          | X       |         |
| Other infectious diseases                   | Male   | Underweight (proportion <2SD weight for age, <5 years) | X        |         |         |          | X       |         |
| Other infectious diseases                   | Male   | Underweight (proportion <2SD weight for age, <5 years) | X        |         |         |          | X       |         |

| Cause                     | Sex    | Covariate                                              | GBD 2015 |         |         | GBD 2016 |         |         |
|---------------------------|--------|--------------------------------------------------------|----------|---------|---------|----------|---------|---------|
|                           |        |                                                        | Level 1  | Level 2 | Level 3 | Level 1  | Level 2 | Level 3 |
| Other infectious diseases | Male   | Sanitation (proportion with access)                    |          | X       |         |          | X       |         |
| Other infectious diseases | Male   | Rainfall Quintile 5 (proportion)                       |          | X       |         |          | X       |         |
| Other infectious diseases | Male   | Education (years per capita)                           |          |         | X       |          |         | X       |
| Other infectious diseases | Male   | DTP3 Coverage (proportion)                             | X        |         |         | X        |         |         |
| Other infectious diseases | Male   | DTP3 Coverage (proportion)                             | X        |         |         |          |         | X       |
| Other infectious diseases | Male   | DTP3 Coverage (proportion)                             |          |         | X       | X        |         |         |
| Other infectious diseases | Male   | DTP3 Coverage (proportion)                             |          |         | X       |          |         | X       |
| Other infectious diseases | Male   | Health System Access (unitless)                        | X        |         |         | X        |         |         |
| Other infectious diseases | Male   | Latitude 30 to 45 (proportion)                         |          | X       |         |          | X       |         |
| Other infectious diseases | Male   | Latitude 30 to 45 (proportion)                         |          | X       |         |          |         | X       |
| Other infectious diseases | Male   | Latitude 30 to 45 (proportion)                         |          |         | X       |          | X       |         |
| Other infectious diseases | Male   | Latitude 30 to 45 (proportion)                         |          |         | X       |          |         | X       |
| Other infectious diseases | Male   | Measles Vaccine Coverage (proportion)                  | X        |         |         | X        |         |         |
| Other infectious diseases | Male   | Latitude Over 45 (proportion)                          |          | X       |         |          | X       |         |
| Other infectious diseases | Male   | Rainfall Quintile 3 (proportion)                       |          | X       |         |          | X       |         |
| Other infectious diseases | Male   | Rainfall Quintile 2 (proportion)                       |          | X       |         |          | X       |         |
| Other infectious diseases | Male   | Rainfall Quintile 1 (proportion)                       |          | X       |         |          | X       |         |
| Other infectious diseases | Male   | LDI (US\$ per capita)                                  |          |         | X       |          |         | X       |
| Other infectious diseases | Male   | Latitude 15 to 30 (proportion)                         |          | X       |         |          | X       |         |
| Other infectious diseases | Male   | Latitude 15 to 30 (proportion)                         |          | X       |         |          |         | X       |
| Other infectious diseases | Male   | Latitude 15 to 30 (proportion)                         |          |         | X       |          | X       |         |
| Other infectious diseases | Male   | Latitude 15 to 30 (proportion)                         |          |         | X       |          |         | X       |
| Other infectious diseases | Male   | Antenatal Care (1 visit) Coverage (proportion)         |          | X       |         |          | X       |         |
| Other infectious diseases | Male   | Antenatal Care (1 visit) Coverage (proportion)         |          | X       |         | X        |         |         |
| Other infectious diseases | Male   | Antenatal Care (1 visit) Coverage (proportion)         | X        |         |         |          | X       |         |
| Other infectious diseases | Male   | Antenatal Care (1 visit) Coverage (proportion)         | X        |         |         | X        |         |         |
| Other infectious diseases | Male   | Rainfall Quintile 4 (proportion)                       |          | X       |         |          | X       |         |
| Other infectious diseases | Male   | Improved Water Source (proportion with access)         |          | X       |         |          | X       |         |
| Other infectious diseases | Male   | Latitude Under 15 (proportion)                         |          | X       |         |          | X       |         |
| Other infectious diseases | Male   | Latitude Under 15 (proportion)                         |          | X       |         |          |         | X       |
| Other infectious diseases | Male   | Latitude Under 15 (proportion)                         |          |         | X       |          | X       |         |
| Other infectious diseases | Male   | Latitude Under 15 (proportion)                         |          |         | X       |          |         | X       |
| Other infectious diseases | Male   | Socio-demographic Index                                |          | X       |         |          |         | X       |
| Other infectious diseases | Female | Underweight (proportion <2SD weight for age, <5 years) |          | X       |         |          | X       |         |
| Other infectious diseases | Female | Underweight (proportion <2SD weight for age, <5 years) |          | X       |         | X        |         |         |
| Other infectious diseases | Female | Underweight (proportion <2SD weight for age, <5 years) | X        |         |         |          | X       |         |
| Other infectious diseases | Female | Underweight (proportion <2SD weight for age, <5 years) | X        |         |         | X        |         |         |
| Other infectious diseases | Female | Sanitation (proportion with access)                    |          | X       |         |          | X       |         |
| Other infectious diseases | Female | Rainfall Quintile 5 (proportion)                       |          | X       |         |          | X       |         |
| Other infectious diseases | Female | Education (years per capita)                           |          |         | X       |          |         | X       |
| Other infectious diseases | Female | DTP3 Coverage (proportion)                             | X        |         |         | X        |         |         |
| Other infectious diseases | Female | DTP3 Coverage (proportion)                             | X        |         |         |          |         | X       |
| Other infectious diseases | Female | DTP3 Coverage (proportion)                             |          |         | X       | X        |         |         |
| Other infectious diseases | Female | DTP3 Coverage (proportion)                             |          |         | X       |          |         | X       |
| Other infectious diseases | Female | Health System Access (unitless)                        | X        |         |         | X        |         |         |
| Other infectious diseases | Female | Latitude 30 to 45 (proportion)                         |          | X       |         |          | X       |         |
| Other infectious diseases | Female | Latitude 30 to 45 (proportion)                         |          | X       |         |          |         | X       |
| Other infectious diseases | Female | Latitude 30 to 45 (proportion)                         |          |         | X       |          | X       |         |
| Other infectious diseases | Female | Latitude 30 to 45 (proportion)                         |          |         | X       |          |         | X       |
| Other infectious diseases | Female | Measles Vaccine Coverage (proportion)                  | X        |         |         | X        |         |         |
| Other infectious diseases | Female | Latitude Over 45 (proportion)                          |          | X       |         |          | X       |         |
| Other infectious diseases | Female | Rainfall Quintile 3 (proportion)                       |          | X       |         |          | X       |         |
| Other infectious diseases | Female | Rainfall Quintile 2 (proportion)                       |          | X       |         |          | X       |         |
| Other infectious diseases | Female | Rainfall Quintile 1 (proportion)                       |          | X       |         |          | X       |         |
| Other infectious diseases | Female | LDI (US\$ per capita)                                  |          |         | X       |          |         | X       |
| Other infectious diseases | Female | Latitude 15 to 30 (proportion)                         |          | X       |         |          | X       |         |
| Other infectious diseases | Female | Latitude 15 to 30 (proportion)                         |          | X       |         |          |         | X       |
| Other infectious diseases | Female | Latitude 15 to 30 (proportion)                         |          |         | X       |          | X       |         |
| Other infectious diseases | Female | Latitude 15 to 30 (proportion)                         |          |         | X       |          |         | X       |
| Other infectious diseases | Female | Antenatal Care (1 visit) Coverage (proportion)         |          | X       |         |          | X       |         |
| Other infectious diseases | Female | Antenatal Care (1 visit) Coverage (proportion)         |          | X       |         | X        |         |         |
| Other infectious diseases | Female | Antenatal Care (1 visit) Coverage (proportion)         | X        |         |         |          | X       |         |
| Other infectious diseases | Female | Antenatal Care (1 visit) Coverage (proportion)         | X        |         |         | X        |         |         |
| Other infectious diseases | Female | Rainfall Quintile 4 (proportion)                       |          | X       |         |          | X       |         |
| Other infectious diseases | Female | Improved Water Source (proportion with access)         |          | X       |         |          | X       |         |
| Other infectious diseases | Female | Latitude Under 15 (proportion)                         |          | X       |         |          | X       |         |
| Other infectious diseases | Female | Latitude Under 15 (proportion)                         |          | X       |         |          |         | X       |
| Other infectious diseases | Female | Latitude Under 15 (proportion)                         |          |         | X       |          | X       |         |
| Other infectious diseases | Female | Latitude Under 15 (proportion)                         |          |         | X       |          |         | X       |
| Other infectious diseases | Female | Socio-demographic Index                                |          | X       |         |          |         | X       |
| Esophageal cancer         | Male   | Alcohol (liters per capita)                            | X        |         |         | X        |         |         |
| Esophageal cancer         | Male   | Tobacco (cigarettes per capita)                        | X        |         |         | X        |         |         |
| Esophageal cancer         | Male   | Education (years per capita)                           |          |         | X       |          |         | X       |
| Esophageal cancer         | Male   | Fruits (kcal per capita)                               | X        |         |         | X        |         |         |
| Esophageal cancer         | Male   | LDI (US\$ per capita)                                  |          |         | X       |          |         | X       |
| Esophageal cancer         | Male   | Mean BMI                                               | X        |         |         | X        |         |         |
| Esophageal cancer         | Male   | Indoor Air Pollution (All Cooking Fuels)               |          | X       |         |          | X       |         |
| Esophageal cancer         | Male   | Sanitation (proportion with access)                    |          | X       |         |          | X       |         |
| Esophageal cancer         | Male   | Smoking Prevalence                                     | X        |         |         | X        |         |         |
| Esophageal cancer         | Male   | Vegetables (kcal per capita)                           |          | X       |         |          | X       |         |
| Esophageal cancer         | Male   | Improved Water Source (proportion with access)         |          | X       |         |          | X       |         |
| Esophageal cancer         | Male   | Socio-demographic Index                                |          |         | X       |          | X       |         |
| Esophageal cancer         | Female | Alcohol (liters per capita)                            | X        |         |         | X        |         |         |
| Esophageal cancer         | Female | Tobacco (cigarettes per capita)                        | X        |         |         | X        |         |         |
| Esophageal cancer         | Female | Education (years per capita)                           |          |         | X       |          |         | X       |

| Cause                               | Sex    | Covariate                                           | GBD 2015 |         |         | GBD 2016 |         |         |
|-------------------------------------|--------|-----------------------------------------------------|----------|---------|---------|----------|---------|---------|
|                                     |        |                                                     | Level 1  | Level 2 | Level 3 | Level 1  | Level 2 | Level 3 |
| Esophageal cancer                   | Female | Fruits (kcal per capita)                            | X        |         |         | X        |         |         |
| Esophageal cancer                   | Female | LDI (I\$ per capita)                                |          |         | X       |          |         | X       |
| Esophageal cancer                   | Female | Mean BMI                                            | X        |         |         | X        |         |         |
| Esophageal cancer                   | Female | Indoor Air Pollution (All Cooking Fuels)            |          | X       |         |          | X       |         |
| Esophageal cancer                   | Female | Sanitation (proportion with access)                 |          | X       |         |          | X       |         |
| Esophageal cancer                   | Female | Smoking Prevalence                                  | X        |         |         | X        |         |         |
| Esophageal cancer                   | Female | Vegetables (kcal per capita)                        |          | X       |         |          | X       |         |
| Esophageal cancer                   | Female | Improved Water Source (proportion with access)      |          | X       |         |          | X       |         |
| Esophageal cancer                   | Female | Socio-demographic Index                             |          |         | X       |          |         | X       |
| Esophageal cancer                   | Female | Socio-demographic Index                             |          |         | X       |          | X       |         |
| Stomach cancer                      | Male   | Alcohol (liters per capita)                         | X        |         |         | X        |         |         |
| Stomach cancer                      | Male   | Tobacco (cigarettes per capita)                     | X        |         |         | X        |         |         |
| Stomach cancer                      | Male   | Cumulative Cigarettes (10 Years)                    | X        |         |         | X        |         |         |
| Stomach cancer                      | Male   | Cumulative Cigarettes (15 Years)                    | X        |         |         | X        |         |         |
| Stomach cancer                      | Male   | LDI (I\$ per capita)                                |          |         | X       |          |         | X       |
| Stomach cancer                      | Male   | Mean BMI                                            |          | X       |         |          | X       |         |
| Stomach cancer                      | Male   | Indoor Air Pollution (All Cooking Fuels)            |          | X       |         |          | X       |         |
| Stomach cancer                      | Male   | Outdoor Air Pollution (PM2.5)                       |          | X       |         |          | X       |         |
| Stomach cancer                      | Male   | Sanitation (proportion with access)                 |          | X       |         |          | X       |         |
| Stomach cancer                      | Male   | Smoking Prevalence                                  | X        |         |         | X        |         |         |
| Stomach cancer                      | Male   | Improved Water Source (proportion with access)      |          | X       |         |          | X       |         |
| Stomach cancer                      | Male   | Log-transformed SEV scalar: Stomach C               | X        |         |         | X        |         |         |
| Stomach cancer                      | Male   | Socio-demographic Index                             |          |         | X       |          |         | X       |
| Stomach cancer                      | Female | Alcohol (liters per capita)                         | X        |         |         | X        |         |         |
| Stomach cancer                      | Female | Tobacco (cigarettes per capita)                     | X        |         |         | X        |         |         |
| Stomach cancer                      | Female | Cumulative Cigarettes (10 Years)                    | X        |         |         | X        |         |         |
| Stomach cancer                      | Female | Education (years per capita)                        |          |         | X       |          |         | X       |
| Stomach cancer                      | Female | LDI (I\$ per capita)                                |          |         | X       |          |         | X       |
| Stomach cancer                      | Female | Mean BMI                                            |          | X       |         |          | X       |         |
| Stomach cancer                      | Female | Indoor Air Pollution (All Cooking Fuels)            |          | X       |         |          | X       |         |
| Stomach cancer                      | Female | Outdoor Air Pollution (PM2.5)                       |          | X       |         |          | X       |         |
| Stomach cancer                      | Female | Sanitation (proportion with access)                 |          | X       |         |          | X       |         |
| Stomach cancer                      | Female | Smoking Prevalence                                  | X        |         |         | X        |         |         |
| Stomach cancer                      | Female | Improved Water Source (proportion with access)      |          | X       |         |          | X       |         |
| Stomach cancer                      | Female | Log-transformed SEV scalar: Stomach C               | X        |         |         | X        |         |         |
| Stomach cancer                      | Female | Socio-demographic Index                             |          |         | X       |          |         | X       |
| Liver cancer                        | Male   | Cumulative Cigarettes (15 Years)                    | X        |         |         | X        |         |         |
| Liver cancer                        | Male   | Tobacco (cigarettes per capita)                     | X        |         |         | X        |         |         |
| Liver cancer                        | Male   | Education (years per capita)                        |          |         | X       |          |         | X       |
| Liver cancer                        | Male   | LDI (I\$ per capita)                                |          |         | X       |          |         | X       |
| Liver cancer                        | Male   | Cumulative Cigarettes (20 Years)                    | X        |         |         | X        |         |         |
| Liver cancer                        | Male   | Diabetes Age-Standardized Prevalence (proportion)   |          | X       |         |          | X       |         |
| Liver cancer                        | Male   | Mean BMI                                            |          | X       |         |          | X       |         |
| Liver cancer                        | Male   | Alcohol (liters per capita)                         | X        |         |         | X        |         |         |
| Liver cancer                        | Male   | Log-transformed SEV scalar: Liver C                 | X        |         |         | X        |         |         |
| Liver cancer                        | Male   | Socio-demographic Index                             |          |         | X       |          |         | X       |
| Liver cancer                        | Female | Cumulative Cigarettes (15 Years)                    | X        |         |         | X        |         |         |
| Liver cancer                        | Female | Tobacco (cigarettes per capita)                     | X        |         |         | X        |         |         |
| Liver cancer                        | Female | Education (years per capita)                        |          |         | X       |          |         | X       |
| Liver cancer                        | Female | LDI (I\$ per capita)                                |          |         | X       |          |         | X       |
| Liver cancer                        | Female | Cumulative Cigarettes (20 Years)                    | X        |         |         | X        |         |         |
| Liver cancer                        | Female | Diabetes Age-Standardized Prevalence (proportion)   |          | X       |         |          | X       |         |
| Liver cancer                        | Female | Mean BMI                                            |          | X       |         |          | X       |         |
| Liver cancer                        | Female | Alcohol (liters per capita)                         | X        |         |         | X        |         |         |
| Liver cancer                        | Female | Log-transformed SEV scalar: Liver C                 | X        |         |         | X        |         |         |
| Liver cancer                        | Female | Socio-demographic Index                             |          |         | X       |          |         | X       |
| Larynx cancer                       | Male   | Cumulative Cigarettes (10 Years)                    |          | X       |         |          | X       |         |
| Larynx cancer                       | Male   | Cumulative Cigarettes (15 Years)                    |          | X       |         |          | X       |         |
| Larynx cancer                       | Male   | Cumulative Cigarettes (20 Years)                    |          | X       |         |          | X       |         |
| Larynx cancer                       | Male   | Cumulative Cigarettes (5 Years)                     |          | X       |         |          | X       |         |
| Larynx cancer                       | Male   | Tobacco (cigarettes per capita)                     |          | X       |         |          | X       |         |
| Larynx cancer                       | Male   | Education (years per capita)                        |          |         | X       |          |         | X       |
| Larynx cancer                       | Male   | Log-transformed SEV scalar: Larynx C                | X        |         |         | X        |         |         |
| Larynx cancer                       | Male   | LDI (I\$ per capita)                                |          |         | X       |          |         | X       |
| Larynx cancer                       | Male   | Smoking Prevalence                                  |          | X       |         |          | X       |         |
| Larynx cancer                       | Male   | Alcohol (liters per capita)                         | X        |         |         | X        |         |         |
| Larynx cancer                       | Male   | Population Density (under 150 ppl/sqkm, proportion) |          | X       |         |          | X       |         |
| Larynx cancer                       | Male   | Population Density (over 1000 ppl/sqkm, proportion) |          | X       |         |          | X       |         |
| Larynx cancer                       | Male   | Socio-demographic Index                             |          |         | X       |          |         | X       |
| Larynx cancer                       | Female | Cumulative Cigarettes (10 Years)                    |          | X       |         |          | X       |         |
| Larynx cancer                       | Female | Cumulative Cigarettes (15 Years)                    |          | X       |         |          | X       |         |
| Larynx cancer                       | Female | Cumulative Cigarettes (20 Years)                    |          | X       |         |          | X       |         |
| Larynx cancer                       | Female | Cumulative Cigarettes (5 Years)                     |          | X       |         |          | X       |         |
| Larynx cancer                       | Female | Tobacco (cigarettes per capita)                     |          | X       |         |          | X       |         |
| Larynx cancer                       | Female | Education (years per capita)                        |          |         | X       |          |         | X       |
| Larynx cancer                       | Female | Log-transformed SEV scalar: Larynx C                | X        |         |         | X        |         |         |
| Larynx cancer                       | Female | LDI (I\$ per capita)                                |          |         | X       |          |         | X       |
| Larynx cancer                       | Female | Smoking Prevalence                                  |          | X       |         |          | X       |         |
| Larynx cancer                       | Female | Alcohol (liters per capita)                         | X        |         |         | X        |         |         |
| Larynx cancer                       | Female | Population Density (under 150 ppl/sqkm, proportion) |          | X       |         |          | X       |         |
| Larynx cancer                       | Female | Population Density (over 1000 ppl/sqkm, proportion) |          | X       |         |          | X       |         |
| Larynx cancer                       | Female | Socio-demographic Index                             |          |         | X       |          |         | X       |
| Tracheal, bronchus, and lung cancer | Male   | Tobacco (cigarettes per capita)                     | X        |         |         | X        |         |         |
| Tracheal, bronchus, and lung cancer | Male   | Cumulative Cigarettes (10 Years)                    | X        |         |         | X        |         |         |
| Tracheal, bronchus, and lung cancer | Male   | Cumulative Cigarettes (15 Years)                    | X        |         |         | X        |         |         |

| Cause                               | Sex    | Covariate                                         | GBD 2015 |         |         | GBD 2016 |         |         |
|-------------------------------------|--------|---------------------------------------------------|----------|---------|---------|----------|---------|---------|
|                                     |        |                                                   | Level 1  | Level 2 | Level 3 | Level 1  | Level 2 | Level 3 |
| Tracheal, bronchus, and lung cancer | Male   | Cumulative Cigarettes (20 Years)                  | X        |         |         | X        |         |         |
| Tracheal, bronchus, and lung cancer | Male   | Cumulative Cigarettes (5 Years)                   | X        |         |         | X        |         |         |
| Tracheal, bronchus, and lung cancer | Male   | Education (years per capita)                      |          |         | X       |          |         | X       |
| Tracheal, bronchus, and lung cancer | Male   | LDI (I\$ per capita)                              |          |         | X       |          |         | X       |
| Tracheal, bronchus, and lung cancer | Male   | Indoor Air Pollution (All Cooking Fuels)          |          | X       |         |          | X       |         |
| Tracheal, bronchus, and lung cancer | Male   | Outdoor Air Pollution (PM2.5)                     |          | X       |         |          | X       |         |
| Tracheal, bronchus, and lung cancer | Male   | Smoking Prevalence                                | X        |         |         | X        |         |         |
| Tracheal, bronchus, and lung cancer | Male   | Socio-demographic Index                           |          |         | X       |          |         | X       |
| Tracheal, bronchus, and lung cancer | Female | Tobacco (cigarettes per capita)                   | X        |         |         | X        |         |         |
| Tracheal, bronchus, and lung cancer | Female | Cumulative Cigarettes (10 Years)                  | X        |         |         | X        |         |         |
| Tracheal, bronchus, and lung cancer | Female | Cumulative Cigarettes (15 Years)                  | X        |         |         | X        |         |         |
| Tracheal, bronchus, and lung cancer | Female | Cumulative Cigarettes (20 Years)                  | X        |         |         | X        |         |         |
| Tracheal, bronchus, and lung cancer | Female | Cumulative Cigarettes (5 Years)                   | X        |         |         | X        |         |         |
| Tracheal, bronchus, and lung cancer | Female | Education (years per capita)                      |          |         | X       |          |         | X       |
| Tracheal, bronchus, and lung cancer | Female | LDI (I\$ per capita)                              |          |         | X       |          |         | X       |
| Tracheal, bronchus, and lung cancer | Female | Indoor Air Pollution (All Cooking Fuels)          |          | X       |         |          | X       |         |
| Tracheal, bronchus, and lung cancer | Female | Outdoor Air Pollution (PM2.5)                     |          | X       |         |          | X       |         |
| Tracheal, bronchus, and lung cancer | Female | Smoking Prevalence                                | X        |         |         | X        |         |         |
| Tracheal, bronchus, and lung cancer | Female | Socio-demographic Index                           |          |         | X       |          |         | X       |
| Breast cancer                       | Male   | Cumulative Cigarettes (10 Years)                  |          | X       |         |          | X       |         |
| Breast cancer                       | Male   | Alcohol (liters per capita)                       | X        |         |         | X        |         |         |
| Breast cancer                       | Male   | Education (years per capita)                      |          |         | X       |          |         | X       |
| Breast cancer                       | Male   | LDI (I\$ per capita)                              |          |         | X       |          |         | X       |
| Breast cancer                       | Male   | Log-transformed SEV scalar: Breast C              | X        |         |         | X        |         |         |
| Breast cancer                       | Male   | Socio-demographic Index                           |          |         | X       |          |         | X       |
| Breast cancer                       | Male   | Mean BMI                                          | X        |         |         | X        |         |         |
| Breast cancer                       | Female | Cumulative Cigarettes (10 Years)                  |          | X       |         |          | X       |         |
| Breast cancer                       | Female | Alcohol (liters per capita)                       | X        |         |         | X        |         |         |
| Breast cancer                       | Female | Education (years per capita)                      |          |         | X       |          |         | X       |
| Breast cancer                       | Female | LDI (I\$ per capita)                              |          |         | X       |          |         | X       |
| Breast cancer                       | Female | Log-transformed SEV scalar: Breast C              | X        |         |         | X        |         |         |
| Breast cancer                       | Female | Socio-demographic Index                           |          |         | X       |          |         | X       |
| Breast cancer                       | Female | Mean BMI                                          | X        |         |         | X        |         |         |
| Breast cancer                       | Female | Total Fertility Rate                              |          | X       |         |          | X       |         |
| Cervical cancer                     | Female | Abortion On-Demand Illegal (binary)               | X        |         |         | X        |         |         |
| Cervical cancer                     | Female | Cumulative Cigarettes (10 Years)                  | X        |         |         | X        |         |         |
| Cervical cancer                     | Female | Cumulative Cigarettes (15 Years)                  | X        |         |         | X        |         |         |
| Cervical cancer                     | Female | Cumulative Cigarettes (5 Years)                   | X        |         |         | X        |         |         |
| Cervical cancer                     | Female | Education (years per capita)                      |          |         | X       |          |         | X       |
| Cervical cancer                     | Female | Health System Access 2 (unitless)                 |          | X       |         |          | X       |         |
| Cervical cancer                     | Female | LDI (I\$ per capita)                              |          |         | X       |          |         | X       |
| Cervical cancer                     | Female | Smoking Prevalence                                |          | X       |         |          | X       |         |
| Cervical cancer                     | Female | Total Fertility Rate                              |          | X       |         |          | X       |         |
| Cervical cancer                     | Female | Socio-demographic Index                           |          |         | X       |          |         | X       |
| Cervical cancer                     | Female | HIV age-standardized prevalence                   | X        |         |         | X        |         |         |
| Uterine cancer                      | Female | Cumulative Cigarettes (10 Years)                  |          | X       |         |          | X       |         |
| Uterine cancer                      | Female | Cumulative Cigarettes (5 Years)                   |          | X       |         |          | X       |         |
| Uterine cancer                      | Female | Tobacco (cigarettes per capita)                   |          | X       |         |          | X       |         |
| Uterine cancer                      | Female | Education (years per capita)                      |          |         | X       |          |         | X       |
| Uterine cancer                      | Female | Health System Access (unitless)                   |          | X       |         |          | X       |         |
| Uterine cancer                      | Female | Diabetes Age-Standardized Prevalence (proportion) |          | X       |         |          | X       |         |
| Uterine cancer                      | Female | Smoking Prevalence                                |          | X       |         |          | X       |         |
| Uterine cancer                      | Female | Mean BMI                                          | X        |         |         | X        |         |         |
| Uterine cancer                      | Female | Total Fertility Rate                              |          | X       |         |          | X       |         |
| Uterine cancer                      | Female | Socio-demographic Index                           |          |         | X       |          |         | X       |
| Uterine cancer                      | Female | LDI (I\$ per capita)                              |          |         | X       |          |         | X       |
| Uterine cancer                      | Female | Log-transformed SEV scalar: Uterus C              | X        |         |         | X        |         |         |
| Prostate cancer                     | Male   | Socio-demographic Index                           |          |         | X       |          |         | X       |
| Prostate cancer                     | Male   | Log-transformed SEV scalar: Prostate C            | X        |         |         | X        |         |         |
| Prostate cancer                     | Male   | Education (years per capita)                      |          |         | X       |          |         | X       |
| Prostate cancer                     | Male   | LDI (I\$ per capita)                              |          |         | X       |          |         | X       |
| Colon and rectum cancer             | Male   | Alcohol (liters per capita)                       | X        |         |         | X        |         |         |
| Colon and rectum cancer             | Male   | Tobacco (cigarettes per capita)                   | X        |         |         | X        |         |         |
| Colon and rectum cancer             | Male   | Diabetes Age-Standardized Prevalence (proportion) |          | X       |         |          | X       |         |
| Colon and rectum cancer             | Male   | Education (years per capita)                      |          |         | X       |          |         | X       |
| Colon and rectum cancer             | Male   | Health System Access 2 (unitless)                 |          | X       |         |          | X       |         |
| Colon and rectum cancer             | Male   | LDI (I\$ per capita)                              |          |         | X       |          |         | X       |
| Colon and rectum cancer             | Male   | Mean BMI                                          | X        |         |         | X        |         |         |
| Colon and rectum cancer             | Male   | Smoking Prevalence                                | X        |         |         | X        |         |         |
| Colon and rectum cancer             | Male   | Log-transformed SEV scalar: Colorect C            | X        |         |         | X        |         |         |
| Colon and rectum cancer             | Male   | Socio-demographic Index                           |          |         | X       |          |         | X       |
| Colon and rectum cancer             | Female | Alcohol (liters per capita)                       | X        |         |         | X        |         |         |
| Colon and rectum cancer             | Female | Tobacco (cigarettes per capita)                   |          | X       |         |          | X       |         |
| Colon and rectum cancer             | Female | Diabetes Age-Standardized Prevalence (proportion) |          | X       |         |          | X       |         |
| Colon and rectum cancer             | Female | Education (years per capita)                      |          |         | X       |          |         | X       |
| Colon and rectum cancer             | Female | Health System Access 2 (unitless)                 |          | X       |         |          | X       |         |
| Colon and rectum cancer             | Female | LDI (I\$ per capita)                              |          |         | X       |          |         | X       |
| Colon and rectum cancer             | Female | Mean BMI                                          | X        |         |         | X        |         |         |
| Colon and rectum cancer             | Female | Smoking Prevalence                                |          | X       |         |          | X       |         |
| Colon and rectum cancer             | Female | Log-transformed SEV scalar: Colorect C            | X        |         |         | X        |         |         |
| Colon and rectum cancer             | Female | Socio-demographic Index                           |          |         | X       |          |         | X       |
| Lip and oral cavity cancer          | Male   | Alcohol (liters per capita)                       | X        |         |         | X        |         |         |
| Lip and oral cavity cancer          | Male   | Cumulative Cigarettes (10 Years)                  | X        |         |         | X        |         |         |
| Lip and oral cavity cancer          | Male   | Cumulative Cigarettes (20 Years)                  | X        |         |         | X        |         |         |
| Lip and oral cavity cancer          | Male   | Education (years per capita)                      |          |         | X       |          |         | X       |

| Cause                                | Sex    | Covariate                                           | GBD 2015 |         |         | GBD 2016 |         |         |
|--------------------------------------|--------|-----------------------------------------------------|----------|---------|---------|----------|---------|---------|
|                                      |        |                                                     | Level 1  | Level 2 | Level 3 | Level 1  | Level 2 | Level 3 |
| Lip and oral cavity cancer           | Male   | Health System Access 2 (unitless)                   |          | X       |         |          | X       |         |
| Lip and oral cavity cancer           | Male   | LDI (I\$ per capita)                                |          |         | X       |          |         | X       |
| Lip and oral cavity cancer           | Male   | Smoking Prevalence                                  | X        |         |         | X        |         |         |
| Lip and oral cavity cancer           | Male   | Log-transformed SEV scalar: Mouth C                 | X        |         |         | X        |         |         |
| Lip and oral cavity cancer           | Male   | Socio-demographic Index                             |          |         | X       |          |         | X       |
| Lip and oral cavity cancer           | Female | Alcohol (liters per capita)                         | X        |         |         | X        |         |         |
| Lip and oral cavity cancer           | Female | Cumulative Cigarettes (10 Years)                    | X        |         |         | X        |         |         |
| Lip and oral cavity cancer           | Female | Cumulative Cigarettes (20 Years)                    | X        |         |         | X        |         |         |
| Lip and oral cavity cancer           | Female | Education (years per capita)                        |          |         | X       |          |         | X       |
| Lip and oral cavity cancer           | Female | Fruits (kcal per capita)                            |          | X       |         |          | X       |         |
| Lip and oral cavity cancer           | Female | Health System Access 2 (unitless)                   |          | X       |         |          | X       |         |
| Lip and oral cavity cancer           | Female | LDI (I\$ per capita)                                |          |         | X       |          |         | X       |
| Lip and oral cavity cancer           | Female | Red Meat (kcal per capita)                          |          | X       |         |          | X       |         |
| Lip and oral cavity cancer           | Female | Smoking Prevalence                                  | X        |         |         | X        |         |         |
| Lip and oral cavity cancer           | Female | Vegetables (kcal per capita)                        | X        |         |         | X        |         |         |
| Lip and oral cavity cancer           | Female | Socio-demographic Index                             |          |         | X       |          |         | X       |
| Nasopharynx cancer                   | Male   | Alcohol (liters per capita)                         | X        |         |         | X        |         |         |
| Nasopharynx cancer                   | Male   | Education (years per capita)                        |          |         | X       |          |         | X       |
| Nasopharynx cancer                   | Male   | Health System Access 2 (unitless)                   |          | X       |         |          | X       |         |
| Nasopharynx cancer                   | Male   | LDI (I\$ per capita)                                |          |         | X       |          |         | X       |
| Nasopharynx cancer                   | Male   | Population Density (over 1000 ppl/sqkm, proportion) |          | X       |         |          | X       |         |
| Nasopharynx cancer                   | Male   | Population Density (under 150 ppl/sqkm, proportion) |          | X       |         |          | X       |         |
| Nasopharynx cancer                   | Male   | Log-transformed SEV scalar: Nasoph C                | X        |         |         | X        |         |         |
| Nasopharynx cancer                   | Male   | Socio-demographic Index                             |          |         | X       |          |         | X       |
| Nasopharynx cancer                   | Female | Alcohol (liters per capita)                         | X        |         |         | X        |         |         |
| Nasopharynx cancer                   | Female | Education (years per capita)                        |          |         | X       |          |         | X       |
| Nasopharynx cancer                   | Female | Health System Access 2 (unitless)                   |          | X       |         |          | X       |         |
| Nasopharynx cancer                   | Female | LDI (I\$ per capita)                                |          |         | X       |          |         | X       |
| Nasopharynx cancer                   | Female | Population Density (over 1000 ppl/sqkm, proportion) |          | X       |         |          | X       |         |
| Nasopharynx cancer                   | Female | Population Density (under 150 ppl/sqkm, proportion) |          | X       |         |          | X       |         |
| Nasopharynx cancer                   | Female | Log-transformed SEV scalar: Nasoph C                | X        |         |         | X        |         |         |
| Nasopharynx cancer                   | Female | Socio-demographic Index                             |          |         | X       |          |         | X       |
| Other pharynx cancer                 | Male   | Alcohol (liters per capita)                         | X        |         |         | X        |         |         |
| Other pharynx cancer                 | Male   | Cumulative Cigarettes (5 Years)                     |          | X       |         |          | X       |         |
| Other pharynx cancer                 | Male   | Education (years per capita)                        |          |         | X       |          |         | X       |
| Other pharynx cancer                 | Male   | LDI (I\$ per capita)                                |          |         | X       |          |         | X       |
| Other pharynx cancer                 | Male   | Population Density (over 1000 ppl/sqkm, proportion) |          | X       |         |          | X       |         |
| Other pharynx cancer                 | Male   | Population Density (under 150 ppl/sqkm, proportion) |          | X       |         |          | X       |         |
| Other pharynx cancer                 | Male   | Smoking Prevalence                                  | X        |         |         | X        |         |         |
| Other pharynx cancer                 | Male   | Health System Access (capped)                       |          | X       |         |          | X       |         |
| Other pharynx cancer                 | Male   | Log-transformed SEV scalar: Oth Phar C              | X        |         |         | X        |         |         |
| Other pharynx cancer                 | Male   | Socio-demographic Index                             |          |         | X       |          |         | X       |
| Other pharynx cancer                 | Female | Alcohol (liters per capita)                         | X        |         |         | X        |         |         |
| Other pharynx cancer                 | Female | Cumulative Cigarettes (5 Years)                     |          | X       |         |          | X       |         |
| Other pharynx cancer                 | Female | Education (years per capita)                        |          |         | X       |          |         | X       |
| Other pharynx cancer                 | Female | LDI (I\$ per capita)                                |          |         | X       |          |         | X       |
| Other pharynx cancer                 | Female | Population Density (over 1000 ppl/sqkm, proportion) |          | X       |         |          | X       |         |
| Other pharynx cancer                 | Female | Population Density (under 150 ppl/sqkm, proportion) |          | X       |         |          | X       |         |
| Other pharynx cancer                 | Female | Smoking Prevalence                                  | X        |         |         | X        |         |         |
| Other pharynx cancer                 | Female | Health System Access (capped)                       |          | X       |         |          | X       |         |
| Other pharynx cancer                 | Female | Log-transformed SEV scalar: Oth Phar C              | X        |         |         | X        |         |         |
| Other pharynx cancer                 | Female | Socio-demographic Index                             |          |         | X       |          |         | X       |
| Gallbladder and biliary tract cancer | Female | Cumulative Cigarettes (10 Years)                    |          | X       |         |          | X       |         |
| Gallbladder and biliary tract cancer | Female | Cumulative Cigarettes (5 Years)                     |          | X       |         |          | X       |         |
| Gallbladder and biliary tract cancer | Female | Tobacco (cigarettes per capita)                     |          | X       |         |          | X       |         |
| Gallbladder and biliary tract cancer | Female | Education (years per capita)                        |          |         | X       |          |         | X       |
| Gallbladder and biliary tract cancer | Female | Health System Access (capped)                       |          | X       |         |          | X       |         |
| Gallbladder and biliary tract cancer | Female | LDI (I\$ per capita)                                |          |         | X       |          |         | X       |
| Gallbladder and biliary tract cancer | Female | Log-transformed SEV scalar: Gallblad C              | X        |         |         | X        |         |         |
| Gallbladder and biliary tract cancer | Female | Diabetes Age-Standardized Prevalence (proportion)   |          | X       |         |          | X       |         |
| Gallbladder and biliary tract cancer | Female | Smoking Prevalence                                  |          | X       |         |          | X       |         |
| Gallbladder and biliary tract cancer | Female | Alcohol (liters per capita)                         |          | X       |         |          | X       |         |
| Gallbladder and biliary tract cancer | Female | Mean BMI                                            | X        |         |         | X        |         |         |
| Gallbladder and biliary tract cancer | Female | Socio-demographic Index                             |          |         | X       |          |         | X       |
| Gallbladder and biliary tract cancer | Male   | Cumulative Cigarettes (10 Years)                    |          | X       |         |          | X       |         |
| Gallbladder and biliary tract cancer | Male   | Cumulative Cigarettes (5 Years)                     |          | X       |         |          | X       |         |
| Gallbladder and biliary tract cancer | Male   | Tobacco (cigarettes per capita)                     |          | X       |         |          | X       |         |
| Gallbladder and biliary tract cancer | Male   | Education (years per capita)                        |          |         | X       |          |         | X       |
| Gallbladder and biliary tract cancer | Male   | Health System Access (capped)                       |          | X       |         |          | X       |         |
| Gallbladder and biliary tract cancer | Male   | LDI (I\$ per capita)                                |          |         | X       |          |         | X       |
| Gallbladder and biliary tract cancer | Male   | Log-transformed SEV scalar: Gallblad C              | X        |         |         | X        |         |         |
| Gallbladder and biliary tract cancer | Male   | Diabetes Age-Standardized Prevalence (proportion)   |          | X       |         |          | X       |         |
| Gallbladder and biliary tract cancer | Male   | Smoking Prevalence                                  |          | X       |         |          | X       |         |
| Gallbladder and biliary tract cancer | Male   | Alcohol (liters per capita)                         |          | X       |         |          | X       |         |
| Gallbladder and biliary tract cancer | Male   | Mean BMI                                            | X        |         |         | X        |         |         |
| Gallbladder and biliary tract cancer | Male   | Socio-demographic Index                             |          |         | X       |          |         | X       |
| Pancreatic cancer                    | Male   | Cumulative Cigarettes (10 Years)                    | X        |         |         | X        |         |         |
| Pancreatic cancer                    | Male   | Total Calories (kcal per capita)                    |          | X       |         |          | X       |         |
| Pancreatic cancer                    | Male   | Cumulative Cigarettes (20 Years)                    | X        |         |         | X        |         |         |
| Pancreatic cancer                    | Male   | Cumulative Cigarettes (5 Years)                     |          | X       |         |          | X       |         |
| Pancreatic cancer                    | Male   | Tobacco (cigarettes per capita)                     | X        |         |         | X        |         |         |
| Pancreatic cancer                    | Male   | Education (years per capita)                        |          |         | X       |          |         | X       |
| Pancreatic cancer                    | Male   | Log-transformed SEV scalar: Pancreas C              | X        |         |         | X        |         |         |
| Pancreatic cancer                    | Male   | Diabetes Age-Standardized Prevalence (proportion)   |          | X       |         |          | X       |         |
| Pancreatic cancer                    | Male   | Smoking Prevalence                                  | X        |         |         | X        |         |         |



| Cause                    | Sex    | Covariate                                         | GBD 2015 |         |         | GBD 2016 |         |         |
|--------------------------|--------|---------------------------------------------------|----------|---------|---------|----------|---------|---------|
|                          |        |                                                   | Level 1  | Level 2 | Level 3 | Level 1  | Level 2 | Level 3 |
| Pancreatic cancer        | Male   | Alcohol (liters per capita)                       | X        |         |         | X        |         |         |
| Pancreatic cancer        | Male   | Mean BMI                                          | X        |         |         | X        |         |         |
| Pancreatic cancer        | Male   | Socio-demographic Index                           |          |         |         |          |         | X       |
| Pancreatic cancer        | Male   | LDI (I\$ per capita)                              |          |         | X       |          |         | X       |
| Pancreatic cancer        | Female | Cumulative Cigarettes (10 Years)                  | X        |         |         | X        |         |         |
| Pancreatic cancer        | Female | Cumulative Cigarettes (20 Years)                  | X        |         |         | X        |         |         |
| Pancreatic cancer        | Female | Cumulative Cigarettes (5 Years)                   | X        |         |         | X        |         |         |
| Pancreatic cancer        | Female | Tobacco (cigarettes per capita)                   | X        |         |         | X        |         |         |
| Pancreatic cancer        | Female | Education (years per capita)                      |          |         | X       |          |         | X       |
| Pancreatic cancer        | Female | Log-transformed SEV scalar: Pancreas C            | X        |         |         | X        |         |         |
| Pancreatic cancer        | Female | Diabetes Age-Standardized Prevalence (proportion) |          | X       |         |          | X       |         |
| Pancreatic cancer        | Female | Smoking Prevalence                                | X        |         |         | X        |         |         |
| Pancreatic cancer        | Female | Alcohol (liters per capita)                       |          | X       |         |          | X       |         |
| Pancreatic cancer        | Female | Mean BMI                                          | X        |         |         | X        |         |         |
| Pancreatic cancer        | Female | Socio-demographic Index                           |          |         |         | X        |         | X       |
| Pancreatic cancer        | Female | LDI (I\$ per capita)                              |          |         |         | X        |         | X       |
| Malignant skin melanoma  | Male   | Education (years per capita)                      |          |         |         | X        |         | X       |
| Malignant skin melanoma  | Male   | LDI (I\$ per capita)                              |          |         |         | X        |         | X       |
| Malignant skin melanoma  | Male   | Alcohol (liters per capita)                       | X        |         |         |          | X       |         |
| Malignant skin melanoma  | Male   | Alcohol (liters per capita)                       | X        |         |         | X        |         |         |
| Malignant skin melanoma  | Male   | Latitude 15 to 30 (proportion)                    |          | X       |         |          | X       |         |
| Malignant skin melanoma  | Male   | Latitude Over 45 (proportion)                     |          | X       |         |          | X       |         |
| Malignant skin melanoma  | Male   | Latitude 30 to 45 (proportion)                    |          | X       |         |          | X       |         |
| Malignant skin melanoma  | Male   | Socio-demographic Index                           |          |         |         | X        |         | X       |
| Malignant skin melanoma  | Female | Education (years per capita)                      |          |         |         | X        |         | X       |
| Malignant skin melanoma  | Female | LDI (I\$ per capita)                              |          |         |         | X        |         | X       |
| Malignant skin melanoma  | Female | Alcohol (liters per capita)                       | X        |         |         | X        |         |         |
| Malignant skin melanoma  | Female | Latitude 15 to 30 (proportion)                    |          | X       |         |          | X       |         |
| Malignant skin melanoma  | Female | Latitude Over 45 (proportion)                     |          | X       |         |          | X       |         |
| Malignant skin melanoma  | Female | Latitude 30 to 45 (proportion)                    |          | X       |         |          | X       |         |
| Malignant skin melanoma  | Female | Socio-demographic Index                           |          |         |         | X        |         | X       |
| Non-melanoma skin cancer | Female | Cumulative Cigarettes (10 Years)                  | X        |         |         | X        |         |         |
| Non-melanoma skin cancer | Female | Cumulative Cigarettes (15 Years)                  | X        |         |         | X        |         |         |
| Non-melanoma skin cancer | Female | Socio-demographic Index                           |          |         |         | X        |         | X       |
| Non-melanoma skin cancer | Female | Cumulative Cigarettes (5 Years)                   | X        |         |         | X        |         |         |
| Non-melanoma skin cancer | Female | Education (years per capita)                      |          |         | X       |          |         | X       |
| Non-melanoma skin cancer | Female | Health System Access (capped)                     | X        |         |         |          | X       |         |
| Non-melanoma skin cancer | Female | LDI (I\$ per capita)                              |          |         |         | X        |         | X       |
| Non-melanoma skin cancer | Female | Average latitude                                  |          | X       |         |          | X       |         |
| Non-melanoma skin cancer | Female | Smoking Prevalence                                | X        |         |         | X        |         |         |
| Non-melanoma skin cancer | Male   | Cumulative Cigarettes (10 Years)                  | X        |         |         | X        |         |         |
| Non-melanoma skin cancer | Male   | Cumulative Cigarettes (15 Years)                  | X        |         |         | X        |         |         |
| Non-melanoma skin cancer | Male   | Socio-demographic Index                           |          |         |         | X        |         | X       |
| Non-melanoma skin cancer | Male   | Cumulative Cigarettes (5 Years)                   | X        |         |         | X        |         |         |
| Non-melanoma skin cancer | Male   | Education (years per capita)                      |          |         | X       |          |         | X       |
| Non-melanoma skin cancer | Male   | Health System Access (capped)                     | X        |         |         |          | X       |         |
| Non-melanoma skin cancer | Male   | LDI (I\$ per capita)                              |          |         |         | X        |         | X       |
| Non-melanoma skin cancer | Male   | Average latitude                                  |          | X       |         |          | X       |         |
| Non-melanoma skin cancer | Male   | Smoking Prevalence                                | X        |         |         | X        |         |         |
| Ovarian cancer           | Female | Cumulative Cigarettes (20 Years)                  | X        |         |         | X        |         |         |
| Ovarian cancer           | Female | Smoking Prevalence                                |          | X       |         |          | X       |         |
| Ovarian cancer           | Female | Tobacco (cigarettes per capita)                   | X        |         |         | X        |         |         |
| Ovarian cancer           | Female | Contraception (Modern) Prevalence (proportion)    | X        |         |         | X        |         |         |
| Ovarian cancer           | Female | LDI (I\$ per capita)                              |          |         |         | X        |         | X       |
| Ovarian cancer           | Female | Alcohol (liters per capita)                       | X        |         |         | X        |         |         |
| Ovarian cancer           | Female | Diabetes Age-Standardized Prevalence (proportion) |          | X       |         |          | X       |         |
| Ovarian cancer           | Female | Log-transformed SEV scalar: Ovary C               | X        |         |         | X        |         |         |
| Ovarian cancer           | Female | Education (years per capita)                      |          |         |         | X        |         | X       |
| Ovarian cancer           | Female | Mean BMI                                          |          | X       |         |          | X       |         |
| Ovarian cancer           | Female | Total Fertility Rate                              |          | X       |         |          | X       |         |
| Ovarian cancer           | Female | Socio-demographic Index                           |          |         |         | X        |         | X       |
| Testicular cancer        | Male   | Cumulative Cigarettes (10 Years)                  |          | X       |         |          | X       |         |
| Testicular cancer        | Male   | Cumulative Cigarettes (15 Years)                  |          | X       |         |          | X       |         |
| Testicular cancer        | Male   | Cumulative Cigarettes (5 Years)                   |          | X       |         |          | X       |         |
| Testicular cancer        | Male   | Education (years per capita)                      |          |         | X       |          |         | X       |
| Testicular cancer        | Male   | Fruits (kcal per capita)                          |          | X       |         |          | X       |         |
| Testicular cancer        | Male   | Health System Access 2 (unitless)                 |          | X       |         |          | X       |         |
| Testicular cancer        | Male   | LDI (I\$ per capita)                              |          |         |         | X        |         | X       |
| Testicular cancer        | Male   | Vegetables (kcal per capita)                      |          | X       |         |          | X       |         |
| Testicular cancer        | Male   | Socio-demographic Index                           |          |         |         | X        |         | X       |
| Kidney cancer            | Male   | Cumulative Cigarettes (10 Years)                  | X        |         |         | X        |         |         |
| Kidney cancer            | Male   | Cumulative Cigarettes (15 Years)                  | X        |         |         | X        |         |         |
| Kidney cancer            | Male   | Socio-demographic Index                           |          |         |         | X        |         | X       |
| Kidney cancer            | Male   | Cumulative Cigarettes (5 Years)                   | X        |         |         | X        |         |         |
| Kidney cancer            | Male   | Alcohol (liters per capita)                       |          | X       |         |          | X       |         |
| Kidney cancer            | Male   | Education (years per capita)                      |          |         | X       |          |         | X       |
| Kidney cancer            | Male   | LDI (I\$ per capita)                              |          |         |         | X        |         | X       |
| Kidney cancer            | Male   | Health System Access 2 (unitless)                 |          | X       |         |          | X       |         |
| Kidney cancer            | Male   | Diabetes Age-Standardized Prevalence (proportion) |          | X       |         |          | X       |         |
| Kidney cancer            | Male   | Smoking Prevalence                                |          | X       |         |          | X       |         |
| Kidney cancer            | Male   | Systolic Blood Pressure (mmHg)                    |          | X       |         |          | X       |         |
| Kidney cancer            | Male   | Mean BMI                                          | X        |         |         | X        |         |         |
| Kidney cancer            | Male   | Log-transformed SEV scalar: Kidney C              | X        |         |         | X        |         |         |
| Kidney cancer            | Female | Cumulative Cigarettes (10 Years)                  | X        |         |         | X        |         |         |
| Kidney cancer            | Female | Cumulative Cigarettes (15 Years)                  | X        |         |         | X        |         |         |

| Cause                           | Sex    | Covariate                                           | GBD 2015 |         |         | GBD 2016 |         |         |
|---------------------------------|--------|-----------------------------------------------------|----------|---------|---------|----------|---------|---------|
|                                 |        |                                                     | Level 1  | Level 2 | Level 3 | Level 1  | Level 2 | Level 3 |
| Kidney cancer                   | Female | Socio-demographic Index                             |          |         | X       |          |         | X       |
| Kidney cancer                   | Female | Cumulative Cigarettes (5 Years)                     | X        |         |         | X        |         |         |
| Kidney cancer                   | Female | Alcohol (liters per capita)                         |          | X       |         |          | X       |         |
| Kidney cancer                   | Female | Total Calories (kcal per capita)                    |          | X       |         |          | X       |         |
| Kidney cancer                   | Female | Education (years per capita)                        |          |         | X       |          |         | X       |
| Kidney cancer                   | Female | LDI (I\$ per capita)                                |          |         | X       |          |         | X       |
| Kidney cancer                   | Female | Health System Access 2 (unitless)                   |          | X       |         |          | X       |         |
| Kidney cancer                   | Female | Diabetes Age-Standardized Prevalence (proportion)   |          | X       |         |          | X       |         |
| Kidney cancer                   | Female | Total Fertility Rate                                |          |         | X       |          |         | X       |
| Kidney cancer                   | Female | Smoking Prevalence                                  |          | X       |         |          | X       |         |
| Kidney cancer                   | Female | Systolic Blood Pressure (mmHg)                      |          | X       |         |          | X       |         |
| Kidney cancer                   | Female | Mean BMI                                            | X        |         |         | X        |         |         |
| Kidney cancer                   | Female | Log-transformed SEV scalar: Kidney C                | X        |         |         | X        |         |         |
| Bladder cancer                  | Male   | Cumulative Cigarettes (10 Years)                    | X        |         |         | X        |         |         |
| Bladder cancer                  | Male   | Cumulative Cigarettes (15 Years)                    | X        |         |         | X        |         |         |
| Bladder cancer                  | Male   | Cumulative Cigarettes (5 Years)                     | X        |         |         | X        |         |         |
| Bladder cancer                  | Male   | Education (years per capita)                        |          |         | X       |          |         | X       |
| Bladder cancer                  | Male   | LDI (I\$ per capita)                                |          |         | X       |          |         | X       |
| Bladder cancer                  | Male   | Socio-demographic Index                             |          |         | X       |          |         | X       |
| Bladder cancer                  | Male   | Smoking Prevalence                                  | X        |         |         | X        |         |         |
| Bladder cancer                  | Male   | Alcohol (liters per capita)                         |          | X       |         |          | X       |         |
| Bladder cancer                  | Male   | Log-transformed SEV scalar: Bladder C               | X        |         |         | X        |         |         |
| Bladder cancer                  | Male   | Population Density (under 150 ppl/sqkm, proportion) |          | X       |         |          | X       |         |
| Bladder cancer                  | Male   | Population Density (over 1000 ppl/sqkm, proportion) |          | X       |         |          | X       |         |
| Bladder cancer                  | Female | Cumulative Cigarettes (10 Years)                    | X        |         |         | X        |         |         |
| Bladder cancer                  | Female | Cumulative Cigarettes (15 Years)                    | X        |         |         | X        |         |         |
| Bladder cancer                  | Female | Cumulative Cigarettes (5 Years)                     | X        |         |         | X        |         |         |
| Bladder cancer                  | Female | Education (years per capita)                        |          |         | X       |          |         | X       |
| Bladder cancer                  | Female | LDI (I\$ per capita)                                |          |         | X       |          |         | X       |
| Bladder cancer                  | Female | Socio-demographic Index                             |          |         | X       |          |         | X       |
| Bladder cancer                  | Female | Smoking Prevalence                                  | X        |         |         | X        |         |         |
| Bladder cancer                  | Female | Alcohol (liters per capita)                         |          | X       |         |          | X       |         |
| Bladder cancer                  | Female | Log-transformed SEV scalar: Bladder C               | X        |         |         | X        |         |         |
| Bladder cancer                  | Female | Population Density (under 150 ppl/sqkm, proportion) |          | X       |         |          | X       |         |
| Bladder cancer                  | Female | Population Density (over 1000 ppl/sqkm, proportion) |          | X       |         |          | X       |         |
| Brain and nervous system cancer | Male   | Cumulative Cigarettes (10 Years)                    | X        |         |         | X        |         |         |
| Brain and nervous system cancer | Male   | Cumulative Cigarettes (15 Years)                    | X        |         |         | X        |         |         |
| Brain and nervous system cancer | Male   | Vegetables (kcal per capita)                        |          | X       |         |          | X       |         |
| Brain and nervous system cancer | Male   | Smoking Prevalence                                  | X        |         |         | X        |         |         |
| Brain and nervous system cancer | Male   | Education (years per capita)                        |          |         | X       |          |         | X       |
| Brain and nervous system cancer | Male   | LDI (I\$ per capita)                                |          |         | X       |          |         | X       |
| Brain and nervous system cancer | Male   | Alcohol (liters per capita)                         | X        |         |         | X        |         |         |
| Brain and nervous system cancer | Male   | Systolic Blood Pressure (mmHg)                      |          | X       |         |          | X       |         |
| Brain and nervous system cancer | Male   | Cholesterol (total, mean per capita)                |          | X       |         |          | X       |         |
| Brain and nervous system cancer | Male   | Socio-demographic Index                             |          |         | X       |          |         | X       |
| Brain and nervous system cancer | Female | Cumulative Cigarettes (10 Years)                    | X        |         |         | X        |         |         |
| Brain and nervous system cancer | Female | Cumulative Cigarettes (15 Years)                    | X        |         |         | X        |         |         |
| Brain and nervous system cancer | Female | Smoking Prevalence                                  | X        |         |         | X        |         |         |
| Brain and nervous system cancer | Female | Education (years per capita)                        |          |         | X       |          |         | X       |
| Brain and nervous system cancer | Female | LDI (I\$ per capita)                                |          |         | X       |          |         | X       |
| Brain and nervous system cancer | Female | Alcohol (liters per capita)                         | X        |         |         | X        |         |         |
| Brain and nervous system cancer | Female | Systolic Blood Pressure (mmHg)                      |          | X       |         |          | X       |         |
| Brain and nervous system cancer | Female | Cholesterol (total, mean per capita)                |          | X       |         |          | X       |         |
| Brain and nervous system cancer | Female | Socio-demographic Index                             |          |         | X       |          |         | X       |
| Thyroid cancer                  | Male   | Smoking Prevalence                                  | X        |         |         | X        |         |         |
| Thyroid cancer                  | Male   | Smoking Prevalence                                  | X        |         |         | X        |         |         |
| Thyroid cancer                  | Male   | Sanitation (proportion with access)                 |          | X       |         |          | X       |         |
| Thyroid cancer                  | Male   | Tobacco (cigarettes per capita)                     | X        |         |         |          | X       |         |
| Thyroid cancer                  | Male   | Education (years per capita)                        |          |         | X       |          |         | X       |
| Thyroid cancer                  | Male   | Log-transformed SEV scalar: Thyroid C               | X        |         |         | X        |         |         |
| Thyroid cancer                  | Male   | LDI (I\$ per capita)                                |          |         | X       |          |         | X       |
| Thyroid cancer                  | Male   | Socio-demographic Index                             |          |         | X       |          |         | X       |
| Thyroid cancer                  | Male   | Alcohol (liters per capita)                         | X        |         |         | X        |         |         |
| Thyroid cancer                  | Male   | Mean BMI                                            |          | X       |         |          | X       |         |
| Thyroid cancer                  | Male   | Improved Water Source (proportion with access)      |          | X       |         |          | X       |         |
| Thyroid cancer                  | Female | Smoking Prevalence                                  | X        |         |         |          | X       |         |
| Thyroid cancer                  | Female | Sanitation (proportion with access)                 |          | X       |         |          | X       |         |
| Thyroid cancer                  | Female | Tobacco (cigarettes per capita)                     | X        |         |         |          | X       |         |
| Thyroid cancer                  | Female | Education (years per capita)                        |          |         | X       |          |         | X       |
| Thyroid cancer                  | Female | Log-transformed SEV scalar: Thyroid C               | X        |         |         | X        |         |         |
| Thyroid cancer                  | Female | LDI (I\$ per capita)                                |          |         | X       |          |         | X       |
| Thyroid cancer                  | Female | Socio-demographic Index                             |          |         | X       |          |         | X       |
| Thyroid cancer                  | Female | Alcohol (liters per capita)                         | X        |         |         | X        |         |         |
| Thyroid cancer                  | Female | Mean BMI                                            |          | X       |         |          | X       |         |
| Thyroid cancer                  | Female | Improved Water Source (proportion with access)      |          | X       |         |          | X       |         |
| Mesothelioma                    | Male   | Cumulative Cigarettes (5 Years)                     | X        |         |         | X        |         |         |
| Mesothelioma                    | Male   | Education (years per capita)                        |          |         | X       |          |         | X       |
| Mesothelioma                    | Male   | Gold production (binary)                            |          | X       |         |          | X       |         |
| Mesothelioma                    | Male   | Gold production (kg) per capita                     |          | X       |         |          | X       |         |
| Mesothelioma                    | Male   | LDI (I\$ per capita)                                |          |         | X       |          |         | X       |
| Mesothelioma                    | Male   | Elevation Over 1500m (proportion)                   |          | X       |         |          | X       |         |
| Mesothelioma                    | Male   | Elevation 500 to 1500m (proportion)                 |          | X       |         |          | X       |         |
| Mesothelioma                    | Male   | Population Density (over 1000 ppl/sqkm, proportion) |          | X       |         |          | X       |         |
| Mesothelioma                    | Male   | Population Over 65 (proportion)                     |          | X       |         |          | X       |         |
| Mesothelioma                    | Male   | Smoking Prevalence                                  | X        |         |         | X        |         |         |

| Cause                | Sex    | Covariate                                           | GBD 2015 |         |         | GBD 2016 |         |         |
|----------------------|--------|-----------------------------------------------------|----------|---------|---------|----------|---------|---------|
|                      |        |                                                     | Level 1  | Level 2 | Level 3 | Level 1  | Level 2 | Level 3 |
| Mesothelioma         | Male   | Socio-demographic Index                             |          |         | X       |          |         | X       |
| Mesothelioma         | Female | Asbestos production (binary)                        | X        |         |         | X        |         |         |
| Mesothelioma         | Female | Asbestos production (kg) per capita                 |          | X       |         |          | X       |         |
| Mesothelioma         | Female | Cumulative Cigarettes (5 Years)                     | X        |         |         | X        |         |         |
| Mesothelioma         | Female | Education (years per capita)                        |          |         | X       |          |         | X       |
| Mesothelioma         | Female | Gold production (binary)                            |          | X       |         |          | X       |         |
| Mesothelioma         | Female | Gold production (kg) per capita                     |          | X       |         |          | X       |         |
| Mesothelioma         | Female | LDI (US per capita)                                 |          |         | X       |          |         | X       |
| Mesothelioma         | Female | Elevation Over 1500m (proportion)                   |          | X       |         |          | X       |         |
| Mesothelioma         | Female | Elevation 500 to 1500m (proportion)                 |          | X       |         |          | X       |         |
| Mesothelioma         | Female | Population Density (over 1000 ppl/sqkm, proportion) |          | X       |         |          | X       |         |
| Mesothelioma         | Female | Population Over 65 (proportion)                     |          | X       |         |          | X       |         |
| Mesothelioma         | Female | Smoking Prevalence                                  | X        |         |         | X        |         |         |
| Mesothelioma         | Female | Log-transformed SEV scalar: Mesothel                | X        |         |         | X        |         |         |
| Mesothelioma         | Female | Socio-demographic Index                             |          |         | X       |          |         | X       |
| Hodgkin lymphoma     | Male   | Education (years per capita)                        |          |         | X       |          |         | X       |
| Hodgkin lymphoma     | Male   | LDI (US per capita)                                 |          |         | X       |          |         | X       |
| Hodgkin lymphoma     | Male   | Socio-demographic Index                             |          |         | X       |          |         | X       |
| Hodgkin lymphoma     | Female | Education (years per capita)                        |          |         | X       |          |         | X       |
| Hodgkin lymphoma     | Female | LDI (US per capita)                                 |          |         | X       |          |         | X       |
| Hodgkin lymphoma     | Female | Socio-demographic Index                             |          |         | X       |          |         | X       |
| Non-Hodgkin lymphoma | Female | Cumulative Cigarettes (10 Years)                    |          | X       |         |          | X       |         |
| Non-Hodgkin lymphoma | Female | Socio-demographic Index                             |          |         | X       |          |         | X       |
| Non-Hodgkin lymphoma | Female | Smoking Prevalence                                  |          | X       |         |          | X       |         |
| Non-Hodgkin lymphoma | Female | LDI (US per capita)                                 |          |         | X       |          |         | X       |
| Non-Hodgkin lymphoma | Female | Health System Access 2 (unitless)                   | X        |         |         |          | X       |         |
| Non-Hodgkin lymphoma | Female | Total Fertility Rate                                |          |         | X       |          |         | X       |
| Non-Hodgkin lymphoma | Female | Alcohol (liters per capita)                         |          | X       |         |          | X       |         |
| Non-Hodgkin lymphoma | Male   | Cumulative Cigarettes (10 Years)                    |          | X       |         |          | X       |         |
| Non-Hodgkin lymphoma | Male   | Socio-demographic Index                             |          |         | X       |          |         | X       |
| Non-Hodgkin lymphoma | Male   | Smoking Prevalence                                  |          | X       |         |          | X       |         |
| Non-Hodgkin lymphoma | Male   | LDI (US per capita)                                 |          |         | X       |          |         | X       |
| Non-Hodgkin lymphoma | Male   | Health System Access 2 (unitless)                   | X        |         |         | X        |         |         |
| Non-Hodgkin lymphoma | Male   | Alcohol (liters per capita)                         |          | X       |         |          | X       |         |
| Multiple myeloma     | Female | Smoking Prevalence                                  | X        |         |         | X        |         |         |
| Multiple myeloma     | Female | Sanitation (proportion with access)                 |          | X       |         |          | X       |         |
| Multiple myeloma     | Female | Tobacco (cigarettes per capita)                     | X        |         |         | X        |         |         |
| Multiple myeloma     | Female | Education (years per capita)                        |          |         | X       |          |         | X       |
| Multiple myeloma     | Female | LDI (US per capita)                                 |          |         | X       |          |         | X       |
| Multiple myeloma     | Female | Socio-demographic Index                             |          |         | X       |          |         | X       |
| Multiple myeloma     | Female | Alcohol (liters per capita)                         | X        |         |         | X        |         |         |
| Multiple myeloma     | Female | Mean BMI                                            |          | X       |         |          | X       |         |
| Multiple myeloma     | Female | Improved Water Source (proportion with access)      |          | X       |         |          | X       |         |
| Multiple myeloma     | Male   | Smoking Prevalence                                  | X        |         |         | X        |         |         |
| Multiple myeloma     | Male   | Sanitation (proportion with access)                 |          | X       |         |          | X       |         |
| Multiple myeloma     | Male   | Tobacco (cigarettes per capita)                     | X        |         |         | X        |         |         |
| Multiple myeloma     | Male   | Education (years per capita)                        |          |         | X       |          |         | X       |
| Multiple myeloma     | Male   | LDI (US per capita)                                 |          |         | X       |          |         | X       |
| Multiple myeloma     | Male   | Socio-demographic Index                             |          |         | X       |          |         | X       |
| Multiple myeloma     | Male   | Alcohol (liters per capita)                         | X        |         |         | X        |         |         |
| Multiple myeloma     | Male   | Mean BMI                                            |          | X       |         |          | X       |         |
| Multiple myeloma     | Male   | Improved Water Source (proportion with access)      |          | X       |         |          | X       |         |
| Leukemia             | Male   | Cumulative Cigarettes (10 Years)                    | X        |         |         |          | X       |         |
| Leukemia             | Male   | Cumulative Cigarettes (15 Years)                    | X        |         |         |          | X       |         |
| Leukemia             | Male   | Socio-demographic Index                             |          |         | X       |          |         | X       |
| Leukemia             | Male   | Cumulative Cigarettes (5 Years)                     | X        |         |         |          | X       |         |
| Leukemia             | Male   | Education (years per capita)                        |          |         | X       |          |         | X       |
| Leukemia             | Male   | LDI (US per capita)                                 |          |         | X       |          |         | X       |
| Leukemia             | Male   | Health System Access 2 (unitless)                   | X        |         |         |          | X       |         |
| Leukemia             | Male   | Log-transformed SEV scalar: Leukemia                | X        |         |         | X        |         |         |
| Leukemia             | Male   | Smoking Prevalence                                  | X        |         |         |          | X       |         |
| Leukemia             | Male   | Alcohol (liters per capita)                         |          | X       |         |          | X       |         |
| Leukemia             | Female | Alcohol (liters per capita)                         |          | X       |         |          | X       |         |
| Leukemia             | Female | Cumulative Cigarettes (10 Years)                    | X        |         |         |          | X       |         |
| Leukemia             | Female | Cumulative Cigarettes (15 Years)                    | X        |         |         |          | X       |         |
| Leukemia             | Female | Education (years per capita)                        |          |         | X       |          |         | X       |
| Leukemia             | Female | Health System Access 2 (unitless)                   | X        |         |         |          | X       |         |
| Leukemia             | Female | Health System Access 2 (unitless)                   | X        |         |         | X        |         |         |
| Leukemia             | Female | LDI (US per capita)                                 |          |         | X       |          |         | X       |
| Leukemia             | Female | Smoking Prevalence                                  | X        |         |         |          | X       |         |
| Leukemia             | Female | Log-transformed SEV scalar: Leukemia                | X        |         |         | X        |         |         |
| Leukemia             | Female | Socio-demographic Index                             |          |         | X       |          |         | X       |
| Other neoplasms      | Male   | Tobacco (cigarettes per capita)                     | X        |         |         | X        |         |         |
| Other neoplasms      | Male   | Education (years per capita)                        |          |         | X       |          |         | X       |
| Other neoplasms      | Male   | Health System Access 2 (unitless)                   |          | X       |         |          | X       |         |
| Other neoplasms      | Male   | LDI (US per capita)                                 |          |         | X       |          |         | X       |
| Other neoplasms      | Male   | Nuts & Seeds (kcal per capita)                      |          | X       |         |          | X       |         |
| Other neoplasms      | Male   | Smoking Prevalence                                  | X        |         |         | X        |         |         |
| Other neoplasms      | Male   | Socio-demographic Index                             |          |         | X       |          |         | X       |
| Other neoplasms      | Female | Tobacco (cigarettes per capita)                     | X        |         |         | X        |         |         |
| Other neoplasms      | Female | Education (years per capita)                        |          |         | X       |          |         | X       |
| Other neoplasms      | Female | Health System Access 2 (unitless)                   |          | X       |         |          | X       |         |
| Other neoplasms      | Female | LDI (US per capita)                                 |          |         | X       |          |         | X       |
| Other neoplasms      | Female | Smoking Prevalence                                  | X        |         |         | X        |         |         |
| Other neoplasms      | Female | Socio-demographic Index                             |          |         | X       |          |         | X       |

| Cause                   | Sex    | Covariate                                              | GBD 2015 |         |         | GBD 2016 |         |         |
|-------------------------|--------|--------------------------------------------------------|----------|---------|---------|----------|---------|---------|
|                         |        |                                                        | Level 1  | Level 2 | Level 3 | Level 1  | Level 2 | Level 3 |
| Cardiovascular diseases | Male   | Alcohol (liters per capita)                            |          | X       |         |          |         | X       |
| Cardiovascular diseases | Male   | LDI (I\$ per capita)                                   |          |         | X       |          |         | X       |
| Cardiovascular diseases | Male   | Cholesterol (total, mean per capita)                   | X        |         |         | X        |         |         |
| Cardiovascular diseases | Male   | Smoking Prevalence                                     | X        |         |         | X        |         |         |
| Cardiovascular diseases | Male   | Socio-demographic Index                                |          |         | X       |          |         | X       |
| Cardiovascular diseases | Male   | omega 3 adjusted(g)                                    |          | X       |         |          |         | X       |
| Cardiovascular diseases | Male   | vegetables adjusted(g)                                 |          | X       |         |          |         | X       |
| Cardiovascular diseases | Female | Alcohol (liters per capita)                            |          | X       |         |          |         | X       |
| Cardiovascular diseases | Female | LDI (I\$ per capita)                                   |          |         | X       |          |         | X       |
| Cardiovascular diseases | Female | Cholesterol (total, mean per capita)                   | X        |         |         | X        |         |         |
| Cardiovascular diseases | Female | Smoking Prevalence                                     | X        |         |         | X        |         |         |
| Cardiovascular diseases | Female | Socio-demographic Index                                |          |         | X       |          |         | X       |
| Cardiovascular diseases | Female | omega 3 adjusted(g)                                    |          | X       |         |          |         | X       |
| Cardiovascular diseases | Female | vegetables adjusted(g)                                 |          | X       |         |          |         | X       |
| Rheumatic heart disease | Male   | Log-transformed SEV scalar: RHD                        | X        |         |         | X        |         |         |
| Rheumatic heart disease | Male   | Sanitation (proportion with access)                    | X        |         |         | X        |         |         |
| Rheumatic heart disease | Male   | Education (years per capita)                           |          |         | X       |          |         | X       |
| Rheumatic heart disease | Male   | LDI (I\$ per capita)                                   |          |         | X       |          |         | X       |
| Rheumatic heart disease | Male   | Socio-demographic Index                                |          |         | X       |          |         | X       |
| Rheumatic heart disease | Male   | Underweight (proportion <2SD weight for age, <5 years) | X        |         |         | X        |         |         |
| Rheumatic heart disease | Male   | Improved Water Source (proportion with access)         | X        |         |         | X        |         |         |
| Rheumatic heart disease | Female | Log-transformed SEV scalar: RHD                        | X        |         |         | X        |         |         |
| Rheumatic heart disease | Female | Sanitation (proportion with access)                    | X        |         |         | X        |         |         |
| Rheumatic heart disease | Female | Education (years per capita)                           |          |         | X       |          |         | X       |
| Rheumatic heart disease | Female | LDI (I\$ per capita)                                   |          |         | X       |          |         | X       |
| Rheumatic heart disease | Female | Socio-demographic Index                                |          |         | X       |          |         | X       |
| Rheumatic heart disease | Female | Underweight (proportion <2SD weight for age, <5 years) | X        |         |         | X        |         |         |
| Rheumatic heart disease | Female | Improved Water Source (proportion with access)         | X        |         |         | X        |         |         |
| Ischemic heart disease  | Male   | Alcohol (liters per capita)                            |          | X       |         |          |         | X       |
| Ischemic heart disease  | Male   | LDI (I\$ per capita)                                   |          |         | X       |          |         | X       |
| Ischemic heart disease  | Male   | Cholesterol (total, mean per capita)                   | X        |         |         | X        |         |         |
| Ischemic heart disease  | Male   | Smoking Prevalence                                     | X        |         |         | X        |         |         |
| Ischemic heart disease  | Male   | Log-transformed SEV scalar: IHD                        | X        |         |         | X        |         |         |
| Ischemic heart disease  | Male   | Socio-demographic Index                                |          |         | X       |          |         | X       |
| Ischemic heart disease  | Male   | omega 3 adjusted(g)                                    |          | X       |         |          |         | X       |
| Ischemic heart disease  | Male   | pulses legumes adjusted(g)                             |          | X       |         |          |         | X       |
| Ischemic heart disease  | Male   | vegetables adjusted(g)                                 |          | X       |         |          |         | X       |
| Ischemic heart disease  | Female | Alcohol (liters per capita)                            |          | X       |         |          |         | X       |
| Ischemic heart disease  | Female | LDI (I\$ per capita)                                   |          |         | X       |          |         | X       |
| Ischemic heart disease  | Female | Cholesterol (total, mean per capita)                   | X        |         |         | X        |         |         |
| Ischemic heart disease  | Female | Smoking Prevalence                                     | X        |         |         | X        |         |         |
| Ischemic heart disease  | Female | Log-transformed SEV scalar: IHD                        | X        |         |         | X        |         |         |
| Ischemic heart disease  | Female | Socio-demographic Index                                |          |         | X       |          |         | X       |
| Ischemic heart disease  | Female | omega 3 adjusted(g)                                    |          | X       |         |          |         | X       |
| Ischemic heart disease  | Female | pulses legumes adjusted(g)                             |          | X       |         |          |         | X       |
| Ischemic heart disease  | Female | vegetables adjusted(g)                                 |          | X       |         |          |         | X       |
| Cerebrovascular disease | Male   | Alcohol (liters per capita)                            |          | X       |         |          |         | X       |
| Cerebrovascular disease | Male   | LDI (I\$ per capita)                                   |          |         | X       |          |         | X       |
| Cerebrovascular disease | Male   | Mean BMI                                               | X        |         |         |          | X       |         |
| Cerebrovascular disease | Male   | Cholesterol (total, mean per capita)                   | X        |         |         | X        |         |         |
| Cerebrovascular disease | Male   | Systolic Blood Pressure (mmHg)                         | X        |         |         | X        |         |         |
| Cerebrovascular disease | Male   | Log-transformed SEV scalar: Stroke                     | X        |         |         | X        |         |         |
| Cerebrovascular disease | Male   | Socio-demographic Index                                |          |         | X       |          |         | X       |
| Cerebrovascular disease | Male   | fruits adjusted(g)                                     |          | X       |         |          | X       |         |
| Cerebrovascular disease | Male   | vegetables adjusted(g)                                 |          | X       |         |          | X       |         |
| Cerebrovascular disease | Male   | whole grains adjusted(g)                               |          | X       |         |          |         | X       |
| Cerebrovascular disease | Female | Alcohol (liters per capita)                            |          | X       |         |          |         | X       |
| Cerebrovascular disease | Female | LDI (I\$ per capita)                                   |          |         | X       |          |         | X       |
| Cerebrovascular disease | Female | Mean BMI                                               | X        |         |         |          | X       |         |
| Cerebrovascular disease | Female | Cholesterol (total, mean per capita)                   | X        |         |         | X        |         |         |
| Cerebrovascular disease | Female | Systolic Blood Pressure (mmHg)                         | X        |         |         | X        |         |         |
| Cerebrovascular disease | Female | Log-transformed SEV scalar: Stroke                     | X        |         |         | X        |         |         |
| Cerebrovascular disease | Female | Socio-demographic Index                                |          |         | X       |          |         | X       |
| Cerebrovascular disease | Female | fruits adjusted(g)                                     |          | X       |         |          | X       |         |
| Cerebrovascular disease | Female | vegetables adjusted(g)                                 |          | X       |         |          | X       |         |
| Cerebrovascular disease | Female | whole grains adjusted(g)                               |          | X       |         |          |         | X       |
| Ischemic stroke         | Male   | Alcohol (liters per capita)                            |          | X       |         |          |         | X       |
| Ischemic stroke         | Male   | LDI (I\$ per capita)                                   |          |         | X       |          |         | X       |
| Ischemic stroke         | Male   | Cholesterol (total, mean per capita)                   | X        |         |         | X        |         |         |
| Ischemic stroke         | Male   | Smoking Prevalence                                     | X        |         |         | X        |         |         |
| Ischemic stroke         | Male   | Log-transformed SEV scalar: Isch Stroke                | X        |         |         | X        |         |         |
| Ischemic stroke         | Male   | Socio-demographic Index                                |          |         | X       |          |         | X       |
| Ischemic stroke         | Male   | omega 3 adjusted(g)                                    |          | X       |         |          |         | X       |
| Ischemic stroke         | Male   | fruits adjusted(g)                                     |          | X       |         |          |         | X       |
| Ischemic stroke         | Male   | nuts seeds adjusted(g)                                 |          | X       |         |          |         | X       |
| Ischemic stroke         | Male   | pulses legumes adjusted(g)                             |          | X       |         |          |         | X       |
| Ischemic stroke         | Male   | vegetables adjusted(g)                                 |          | X       |         |          |         | X       |
| Ischemic stroke         | Female | Alcohol (liters per capita)                            |          | X       |         |          |         | X       |
| Ischemic stroke         | Female | LDI (I\$ per capita)                                   |          |         | X       |          |         | X       |
| Ischemic stroke         | Female | Cholesterol (total, mean per capita)                   | X        |         |         | X        |         |         |
| Ischemic stroke         | Female | Smoking Prevalence                                     | X        |         |         | X        |         |         |
| Ischemic stroke         | Female | Log-transformed SEV scalar: Isch Stroke                | X        |         |         | X        |         |         |
| Ischemic stroke         | Female | Socio-demographic Index                                |          |         | X       |          |         | X       |
| Ischemic stroke         | Female | omega 3 adjusted(g)                                    |          | X       |         |          |         | X       |
| Ischemic stroke         | Female | fruits adjusted(g)                                     |          | X       |         |          |         | X       |

| Cause                          | Sex    | Covariate                              | GBD 2015 |         |         | GBD 2016 |         |         |
|--------------------------------|--------|----------------------------------------|----------|---------|---------|----------|---------|---------|
|                                |        |                                        | Level 1  | Level 2 | Level 3 | Level 1  | Level 2 | Level 3 |
| Ischemic stroke                | Female | nuts seeds adjusted(g)                 |          | X       |         |          |         | X       |
| Ischemic stroke                | Female | pulses legumes adjusted(g)             |          | X       |         |          |         | X       |
| Ischemic stroke                | Female | vegetables adjusted(g)                 |          | X       |         |          |         | X       |
| Hemorrhagic stroke             | Male   | Alcohol (liters per capita)            |          | X       |         |          |         | X       |
| Hemorrhagic stroke             | Male   | LDI (I\$ per capita)                   |          |         | X       |          |         | X       |
| Hemorrhagic stroke             | Male   | Smoking Prevalence                     | X        |         |         | X        |         |         |
| Hemorrhagic stroke             | Male   | Log-transformed SEV scalar: Hem Stroke | X        |         |         | X        |         |         |
| Hemorrhagic stroke             | Male   | Socio-demographic Index                |          |         | X       |          |         | X       |
| Hemorrhagic stroke             | Male   | omega 3 adjusted(g)                    |          | X       |         |          |         | X       |
| Hemorrhagic stroke             | Male   | nuts seeds adjusted(g)                 |          | X       |         |          |         | X       |
| Hemorrhagic stroke             | Male   | pufa adjusted(percent)                 |          | X       |         |          |         | X       |
| Hemorrhagic stroke             | Male   | pulses legumes adjusted(g)             |          | X       |         |          |         | X       |
| Hemorrhagic stroke             | Male   | vegetables adjusted(g)                 |          | X       |         |          |         | X       |
| Hemorrhagic stroke             | Female | Alcohol (liters per capita)            |          | X       |         |          |         | X       |
| Hemorrhagic stroke             | Female | LDI (I\$ per capita)                   |          |         | X       |          |         | X       |
| Hemorrhagic stroke             | Female | Smoking Prevalence                     | X        |         |         | X        |         |         |
| Hemorrhagic stroke             | Female | Log-transformed SEV scalar: Hem Stroke | X        |         |         | X        |         |         |
| Hemorrhagic stroke             | Female | Socio-demographic Index                |          |         | X       |          |         | X       |
| Hemorrhagic stroke             | Female | omega 3 adjusted(g)                    |          | X       |         |          |         | X       |
| Hemorrhagic stroke             | Female | nuts seeds adjusted(g)                 |          | X       |         |          |         | X       |
| Hemorrhagic stroke             | Female | pufa adjusted(percent)                 |          | X       |         |          |         | X       |
| Hemorrhagic stroke             | Female | pulses legumes adjusted(g)             |          | X       |         |          |         | X       |
| Hemorrhagic stroke             | Female | vegetables adjusted(g)                 |          | X       |         |          |         | X       |
| Hypertensive heart disease     | Male   | LDI (I\$ per capita)                   |          |         | X       |          |         | X       |
| Hypertensive heart disease     | Male   | Systolic Blood Pressure (mmHg)         | X        |         |         | X        |         |         |
| Hypertensive heart disease     | Male   | Socio-demographic Index                |          |         | X       |          |         | X       |
| Hypertensive heart disease     | Female | LDI (I\$ per capita)                   |          |         | X       |          |         | X       |
| Hypertensive heart disease     | Female | Systolic Blood Pressure (mmHg)         | X        |         |         | X        |         |         |
| Hypertensive heart disease     | Female | Socio-demographic Index                |          |         | X       |          |         | X       |
| Cardiomyopathy and myocarditis | Male   | Log-transformed SEV scalar: CMP        | X        |         |         | X        |         |         |
| Cardiomyopathy and myocarditis | Male   | LDI (I\$ per capita)                   |          |         | X       |          |         | X       |
| Cardiomyopathy and myocarditis | Male   | Systolic Blood Pressure (mmHg)         | X        |         |         | X        |         |         |
| Cardiomyopathy and myocarditis | Male   | Alcohol (liters per capita)            |          | X       |         |          |         | X       |
| Cardiomyopathy and myocarditis | Male   | Socio-demographic Index                |          |         | X       |          |         | X       |
| Cardiomyopathy and myocarditis | Female | Log-transformed SEV scalar: CMP        | X        |         |         | X        |         |         |
| Cardiomyopathy and myocarditis | Female | LDI (I\$ per capita)                   |          |         | X       |          |         | X       |
| Cardiomyopathy and myocarditis | Female | Systolic Blood Pressure (mmHg)         | X        |         |         | X        |         |         |
| Cardiomyopathy and myocarditis | Female | Alcohol (liters per capita)            |          | X       |         |          |         | X       |
| Cardiomyopathy and myocarditis | Female | Socio-demographic Index                |          |         | X       |          |         | X       |
| Aortic aneurysm                | Male   | Alcohol (liters per capita)            |          | X       |         |          |         | X       |
| Aortic aneurysm                | Male   | LDI (I\$ per capita)                   |          |         | X       |          |         | X       |
| Aortic aneurysm                | Male   | Mean BMI                               | X        |         |         |          | X       |         |
| Aortic aneurysm                | Male   | Cholesterol (total, mean per capita)   | X        |         |         | X        |         |         |
| Aortic aneurysm                | Male   | Systolic Blood Pressure (mmHg)         | X        |         |         | X        |         |         |
| Aortic aneurysm                | Male   | Log-transformed SEV scalar: Aort An    | X        |         |         | X        |         |         |
| Aortic aneurysm                | Male   | Socio-demographic Index                |          |         | X       |          |         | X       |
| Aortic aneurysm                | Male   | fruits adjusted(g)                     |          | X       |         |          |         | X       |
| Aortic aneurysm                | Male   | vegetables adjusted(g)                 |          | X       |         |          |         | X       |
| Aortic aneurysm                | Male   | whole grains adjusted(g)               |          | X       |         |          |         | X       |
| Aortic aneurysm                | Female | Alcohol (liters per capita)            |          | X       |         |          |         | X       |
| Aortic aneurysm                | Female | LDI (I\$ per capita)                   |          |         | X       |          |         | X       |
| Aortic aneurysm                | Female | Mean BMI                               | X        |         |         |          | X       |         |
| Aortic aneurysm                | Female | Cholesterol (total, mean per capita)   | X        |         |         | X        |         |         |
| Aortic aneurysm                | Female | Systolic Blood Pressure (mmHg)         | X        |         |         | X        |         |         |
| Aortic aneurysm                | Female | Log-transformed SEV scalar: Aort An    | X        |         |         | X        |         |         |
| Aortic aneurysm                | Female | Socio-demographic Index                |          |         | X       |          |         | X       |
| Aortic aneurysm                | Female | fruits adjusted(g)                     |          | X       |         |          |         | X       |
| Aortic aneurysm                | Female | vegetables adjusted(g)                 |          | X       |         |          |         | X       |
| Aortic aneurysm                | Female | whole grains adjusted(g)               |          | X       |         |          |         | X       |
| Peripheral artery disease      | Male   | Alcohol (liters per capita)            |          | X       |         |          |         | X       |
| Peripheral artery disease      | Male   | LDI (I\$ per capita)                   |          |         | X       |          |         | X       |
| Peripheral artery disease      | Male   | Mean BMI                               | X        |         |         |          | X       |         |
| Peripheral artery disease      | Male   | Cholesterol (total, mean per capita)   | X        |         |         | X        |         |         |
| Peripheral artery disease      | Male   | Systolic Blood Pressure (mmHg)         | X        |         |         | X        |         |         |
| Peripheral artery disease      | Male   | Smoking Prevalence                     |          | X       |         | X        |         |         |
| Peripheral artery disease      | Male   | Log-transformed SEV scalar: PVD        | X        |         |         | X        |         |         |
| Peripheral artery disease      | Male   | Socio-demographic Index                |          |         | X       |          |         | X       |
| Peripheral artery disease      | Male   | omega 3 adjusted(g)                    |          | X       |         |          |         | X       |
| Peripheral artery disease      | Male   | fruits adjusted(g)                     |          | X       |         |          |         | X       |
| Peripheral artery disease      | Male   | nuts seeds adjusted(g)                 |          | X       |         |          |         | X       |
| Peripheral artery disease      | Male   | pufa adjusted(percent)                 |          | X       |         |          |         | X       |
| Peripheral artery disease      | Male   | pulses legumes adjusted(g)             |          | X       |         |          |         | X       |
| Peripheral artery disease      | Male   | vegetables adjusted(g)                 |          | X       |         |          |         | X       |
| Peripheral artery disease      | Male   | whole grains adjusted(g)               |          | X       |         |          |         | X       |
| Peripheral artery disease      | Female | Alcohol (liters per capita)            |          | X       |         |          |         | X       |
| Peripheral artery disease      | Female | LDI (I\$ per capita)                   |          |         | X       |          |         | X       |
| Peripheral artery disease      | Female | Mean BMI                               | X        |         |         |          | X       |         |
| Peripheral artery disease      | Female | Cholesterol (total, mean per capita)   | X        |         |         | X        |         |         |
| Peripheral artery disease      | Female | Systolic Blood Pressure (mmHg)         | X        |         |         | X        |         |         |
| Peripheral artery disease      | Female | Smoking Prevalence                     |          | X       |         | X        |         |         |
| Peripheral artery disease      | Female | Log-transformed SEV scalar: PVD        | X        |         |         | X        |         |         |
| Peripheral artery disease      | Female | Socio-demographic Index                |          |         | X       |          |         | X       |
| Peripheral artery disease      | Female | omega 3 adjusted(g)                    |          | X       |         |          |         | X       |
| Peripheral artery disease      | Female | fruits adjusted(g)                     |          | X       |         |          |         | X       |
| Peripheral artery disease      | Female | nuts seeds adjusted(g)                 |          | X       |         |          |         | X       |

| Cause                                         | Sex    | Covariate                                           | GBD 2015 |         |         | GBD 2016 |         |         |
|-----------------------------------------------|--------|-----------------------------------------------------|----------|---------|---------|----------|---------|---------|
|                                               |        |                                                     | Level 1  | Level 2 | Level 3 | Level 1  | Level 2 | Level 3 |
| Peripheral artery disease                     | Female | pufa adjusted(percent)                              |          | X       |         |          |         | X       |
| Peripheral artery disease                     | Female | pulses legumes adjusted(g)                          |          | X       |         |          |         | X       |
| Peripheral artery disease                     | Female | vegetables adjusted(g)                              |          | X       |         |          |         | X       |
| Peripheral artery disease                     | Female | whole grains adjusted(g)                            |          | X       |         |          |         | X       |
| Endocarditis                                  | Male   | LDI (I\$ per capita)                                |          |         | X       |          |         | X       |
| Endocarditis                                  | Male   | Sanitation (proportion with access)                 | X        |         |         | X        |         |         |
| Endocarditis                                  | Male   | Improved Water Source (proportion with access)      | X        |         |         | X        |         |         |
| Endocarditis                                  | Male   | Log-transformed SEV scalar: Endocar                 | X        |         |         | X        |         |         |
| Endocarditis                                  | Male   | Socio-demographic Index                             |          |         | X       |          |         | X       |
| Endocarditis                                  | Female | LDI (I\$ per capita)                                |          |         | X       |          |         | X       |
| Endocarditis                                  | Female | Sanitation (proportion with access)                 | X        |         |         | X        |         |         |
| Endocarditis                                  | Female | Improved Water Source (proportion with access)      | X        |         |         | X        |         |         |
| Endocarditis                                  | Female | Log-transformed SEV scalar: Endocar                 | X        |         |         | X        |         |         |
| Endocarditis                                  | Female | Socio-demographic Index                             |          |         | X       |          |         | X       |
| Other cardiovascular and circulatory diseases | Male   | Alcohol (liters per capita)                         |          | X       |         |          |         | X       |
| Other cardiovascular and circulatory diseases | Male   | LDI (I\$ per capita)                                |          |         | X       |          |         | X       |
| Other cardiovascular and circulatory diseases | Male   | Mean BMI                                            | X        |         |         |          | X       |         |
| Other cardiovascular and circulatory diseases | Male   | Cholesterol (total, mean per capita)                | X        |         |         | X        |         |         |
| Other cardiovascular and circulatory diseases | Male   | Systolic Blood Pressure (mmHg)                      | X        |         |         | X        |         |         |
| Other cardiovascular and circulatory diseases | Male   | Indoor Air Pollution (All Cooking Fuels)            |          | X       |         |          | X       |         |
| Other cardiovascular and circulatory diseases | Male   | Outdoor Air Pollution (PM2.5)                       |          | X       |         |          | X       |         |
| Other cardiovascular and circulatory diseases | Male   | Smoking Prevalence                                  |          | X       |         | X        |         |         |
| Other cardiovascular and circulatory diseases | Male   | Log-transformed SEV scalar: Oth Cardio              | X        |         |         | X        |         |         |
| Other cardiovascular and circulatory diseases | Male   | Socio-demographic Index                             |          |         | X       |          |         | X       |
| Other cardiovascular and circulatory diseases | Male   | omega 3 adjusted(g)                                 |          | X       |         |          |         | X       |
| Other cardiovascular and circulatory diseases | Male   | fruits adjusted(g)                                  |          | X       |         |          |         | X       |
| Other cardiovascular and circulatory diseases | Male   | nuts seeds adjusted(g)                              |          | X       |         |          |         | X       |
| Other cardiovascular and circulatory diseases | Male   | pufa adjusted(percent)                              |          | X       |         |          |         | X       |
| Other cardiovascular and circulatory diseases | Male   | pulses legumes adjusted(g)                          |          | X       |         |          |         | X       |
| Other cardiovascular and circulatory diseases | Male   | vegetables adjusted(g)                              |          | X       |         |          |         | X       |
| Other cardiovascular and circulatory diseases | Male   | whole grains adjusted(g)                            |          | X       |         |          |         | X       |
| Other cardiovascular and circulatory diseases | Female | Alcohol (liters per capita)                         |          | X       |         |          |         | X       |
| Other cardiovascular and circulatory diseases | Female | LDI (I\$ per capita)                                |          |         | X       |          |         | X       |
| Other cardiovascular and circulatory diseases | Female | Mean BMI                                            | X        |         |         |          | X       |         |
| Other cardiovascular and circulatory diseases | Female | Cholesterol (total, mean per capita)                | X        |         |         | X        |         |         |
| Other cardiovascular and circulatory diseases | Female | Systolic Blood Pressure (mmHg)                      | X        |         |         | X        |         |         |
| Other cardiovascular and circulatory diseases | Female | Indoor Air Pollution (All Cooking Fuels)            |          | X       |         |          | X       |         |
| Other cardiovascular and circulatory diseases | Female | Outdoor Air Pollution (PM2.5)                       |          | X       |         |          | X       |         |
| Other cardiovascular and circulatory diseases | Female | Smoking Prevalence                                  |          | X       |         | X        |         |         |
| Other cardiovascular and circulatory diseases | Female | Log-transformed SEV scalar: Oth Cardio              | X        |         |         | X        |         |         |
| Other cardiovascular and circulatory diseases | Female | Socio-demographic Index                             |          |         | X       |          |         | X       |
| Other cardiovascular and circulatory diseases | Female | omega 3 adjusted(g)                                 |          | X       |         |          |         | X       |
| Other cardiovascular and circulatory diseases | Female | fruits adjusted(g)                                  |          | X       |         |          |         | X       |
| Other cardiovascular and circulatory diseases | Female | nuts seeds adjusted(g)                              |          | X       |         |          |         | X       |
| Other cardiovascular and circulatory diseases | Female | pufa adjusted(percent)                              |          | X       |         |          |         | X       |
| Other cardiovascular and circulatory diseases | Female | pulses legumes adjusted(g)                          |          | X       |         |          |         | X       |
| Other cardiovascular and circulatory diseases | Female | vegetables adjusted(g)                              |          | X       |         |          |         | X       |
| Other cardiovascular and circulatory diseases | Female | whole grains adjusted(g)                            |          | X       |         |          |         | X       |
| Chronic respiratory diseases                  | Male   | Socio-demographic Index                             |          |         | X       |          |         | X       |
| Chronic respiratory diseases                  | Male   | Cumulative Cigarettes (5 Years)                     |          | X       |         | X        |         |         |
| Chronic respiratory diseases                  | Male   | Cumulative Cigarettes (5 Years)                     | X        |         |         | X        |         |         |
| Chronic respiratory diseases                  | Male   | Elevation Over 1500m (proportion)                   |          | X       |         |          | X       |         |
| Chronic respiratory diseases                  | Male   | Education (years per capita)                        |          |         | X       |          |         | X       |
| Chronic respiratory diseases                  | Male   | LDI (I\$ per capita)                                |          |         | X       |          |         | X       |
| Chronic respiratory diseases                  | Male   | Elevation 500 to 1500m (proportion)                 |          |         | X       |          |         | X       |
| Chronic respiratory diseases                  | Male   | Smoking Prevalence                                  | X        |         |         | X        |         |         |
| Chronic respiratory diseases                  | Male   | Smoking Prevalence                                  | X        |         |         |          | X       |         |
| Chronic respiratory diseases                  | Male   | Smoking Prevalence                                  |          | X       |         | X        |         |         |
| Chronic respiratory diseases                  | Male   | Smoking Prevalence                                  |          | X       |         |          | X       |         |
| Chronic respiratory diseases                  | Male   | Outdoor Air Pollution (PM2.5)                       |          | X       |         |          | X       |         |
| Chronic respiratory diseases                  | Male   | Population Density (over 1000 ppl/sqkm, proportion) |          |         | X       |          |         | X       |
| Chronic respiratory diseases                  | Female | Cumulative Cigarettes (10 Years)                    | X        |         |         | X        |         |         |
| Chronic respiratory diseases                  | Female | Cumulative Cigarettes (5 Years)                     | X        |         |         | X        |         |         |
| Chronic respiratory diseases                  | Female | Education (years per capita)                        |          |         | X       |          |         | X       |
| Chronic respiratory diseases                  | Female | LDI (I\$ per capita)                                |          |         | X       |          |         | X       |
| Chronic respiratory diseases                  | Female | Outdoor Air Pollution (PM2.5)                       |          | X       |         |          | X       |         |
| Chronic respiratory diseases                  | Female | Elevation Over 1500m (proportion)                   |          | X       |         |          | X       |         |
| Chronic respiratory diseases                  | Female | Elevation 500 to 1500m (proportion)                 |          |         | X       |          |         | X       |
| Chronic respiratory diseases                  | Female | Population Density (over 1000 ppl/sqkm, proportion) |          |         | X       |          |         | X       |
| Chronic respiratory diseases                  | Female | Smoking Prevalence                                  |          | X       |         |          | X       |         |
| Chronic respiratory diseases                  | Female | Socio-demographic Index                             |          |         | X       |          |         | X       |
| Chronic respiratory diseases                  | Female | Log-transformed SEV scalar: Chr Resp                | X        |         |         | X        |         |         |
| Chronic respiratory diseases                  | Male   | Cumulative Cigarettes (10 Years)                    | X        |         |         | X        |         |         |
| Chronic respiratory diseases                  | Male   | Log-transformed SEV scalar: Chr Resp                | X        |         |         | X        |         |         |
| Chronic obstructive pulmonary disease         | Female | Cumulative Cigarettes (10 Years)                    | X        |         |         | X        |         |         |
| Chronic obstructive pulmonary disease         | Female | Cumulative Cigarettes (5 Years)                     | X        |         |         | X        |         |         |
| Chronic obstructive pulmonary disease         | Female | Education (years per capita)                        |          |         | X       |          |         | X       |
| Chronic obstructive pulmonary disease         | Female | LDI (I\$ per capita)                                |          |         | X       |          |         | X       |
| Chronic obstructive pulmonary disease         | Female | Outdoor Air Pollution (PM2.5)                       |          | X       |         |          | X       |         |
| Chronic obstructive pulmonary disease         | Female | Elevation Over 1500m (proportion)                   | X        |         |         | X        |         |         |
| Chronic obstructive pulmonary disease         | Female | Smoking Prevalence                                  |          | X       |         |          | X       |         |
| Chronic obstructive pulmonary disease         | Female | Socio-demographic Index                             |          |         | X       |          |         | X       |
| Chronic obstructive pulmonary disease         | Male   | Cumulative Cigarettes (10 Years)                    | X        |         |         | X        |         |         |
| Chronic obstructive pulmonary disease         | Male   | Cumulative Cigarettes (5 Years)                     | X        |         |         | X        |         |         |
| Chronic obstructive pulmonary disease         | Male   | Education (years per capita)                        |          |         | X       |          |         | X       |

| Cause                                 | Sex    | Covariate                              | GBD 2015 |         |         | GBD 2016 |         |         |
|---------------------------------------|--------|----------------------------------------|----------|---------|---------|----------|---------|---------|
|                                       |        |                                        | Level 1  | Level 2 | Level 3 | Level 1  | Level 2 | Level 3 |
| Chronic obstructive pulmonary disease | Male   | LDI (I\$ per capita)                   |          |         | X       |          |         | X       |
| Chronic obstructive pulmonary disease | Male   | Outdoor Air Pollution (PM2.5)          |          | X       |         |          | X       |         |
| Chronic obstructive pulmonary disease | Male   | Elevation Over 1500m (proportion)      | X        |         |         | X        |         |         |
| Chronic obstructive pulmonary disease | Male   | Smoking Prevalence                     |          | X       |         |          | X       |         |
| Chronic obstructive pulmonary disease | Male   | Socio-demographic Index                |          |         | X       |          |         | X       |
| Pneumoconiosis                        | Male   | Log-transformed SEV scalar: Pneumocon  | X        |         |         | X        |         |         |
| Pneumoconiosis                        | Male   | Socio-demographic Index                |          |         | X       |          |         | X       |
| Pneumoconiosis                        | Male   | Cumulative Cigarettes (5 Years)        |          | X       |         |          | X       |         |
| Pneumoconiosis                        | Male   | Coal Production (per capita)           | X        |         |         | X        |         |         |
| Pneumoconiosis                        | Male   | Education (years per capita)           |          |         | X       |          |         | X       |
| Pneumoconiosis                        | Male   | LDI (I\$ per capita)                   |          |         | X       |          |         | X       |
| Pneumoconiosis                        | Male   | Gold production (kg) per capita        | X        |         |         | X        |         |         |
| Pneumoconiosis                        | Male   | Smoking Prevalence                     |          | X       |         |          | X       |         |
| Pneumoconiosis                        | Male   | Elevation 500 to 1500m (proportion)    |          | X       |         |          | X       |         |
| Pneumoconiosis                        | Male   | Elevation Over 1500m (proportion)      |          | X       |         |          | X       |         |
| Pneumoconiosis                        | Female | Log-transformed SEV scalar: Pneumocon  | X        |         |         | X        |         |         |
| Pneumoconiosis                        | Female | Socio-demographic Index                |          |         | X       |          |         | X       |
| Pneumoconiosis                        | Female | Cumulative Cigarettes (5 Years)        |          | X       |         |          | X       |         |
| Pneumoconiosis                        | Female | Coal Production (per capita)           | X        |         |         | X        |         |         |
| Pneumoconiosis                        | Female | Education (years per capita)           |          |         | X       |          |         | X       |
| Pneumoconiosis                        | Female | LDI (I\$ per capita)                   |          |         | X       |          |         | X       |
| Pneumoconiosis                        | Female | Gold production (kg) per capita        | X        |         |         | X        |         |         |
| Pneumoconiosis                        | Female | Smoking Prevalence                     |          | X       |         |          | X       |         |
| Pneumoconiosis                        | Female | Elevation 500 to 1500m (proportion)    |          | X       |         |          | X       |         |
| Pneumoconiosis                        | Female | Elevation Over 1500m (proportion)      |          | X       |         |          | X       |         |
| Silicosis                             | Female | Socio-demographic Index                |          |         | X       |          |         | X       |
| Silicosis                             | Female | Cumulative Cigarettes (5 Years)        | X        |         |         |          | X       |         |
| Silicosis                             | Female | Elevation Over 1500m (proportion)      |          | X       |         |          | X       |         |
| Silicosis                             | Female | Education (years per capita)           |          |         | X       |          |         | X       |
| Silicosis                             | Female | LDI (I\$ per capita)                   |          |         | X       |          |         | X       |
| Silicosis                             | Female | Gold production (kg) per capita        |          | X       |         |          |         |         |
| Silicosis                             | Female | Smoking Prevalence                     | X        |         |         |          | X       |         |
| Silicosis                             | Female | Elevation 500 to 1500m (proportion)    |          | X       |         |          | X       |         |
| Silicosis                             | Female | Log-transformed SEV scalar: Silicosis  | X        |         |         | X        |         |         |
| Silicosis                             | Male   | Socio-demographic Index                |          |         | X       |          |         | X       |
| Silicosis                             | Male   | Cumulative Cigarettes (5 Years)        | X        |         |         |          | X       |         |
| Silicosis                             | Male   | Elevation Over 1500m (proportion)      |          | X       |         |          | X       |         |
| Silicosis                             | Male   | Education (years per capita)           |          |         | X       |          |         | X       |
| Silicosis                             | Male   | LDI (I\$ per capita)                   |          |         | X       |          |         | X       |
| Silicosis                             | Male   | Gold production (kg) per capita        |          | X       |         |          |         |         |
| Silicosis                             | Male   | Smoking Prevalence                     | X        |         |         |          | X       |         |
| Silicosis                             | Male   | Elevation 500 to 1500m (proportion)    |          | X       |         |          | X       |         |
| Silicosis                             | Male   | Log-transformed SEV scalar: Silicosis  | X        |         |         | X        |         |         |
| Asbestosis                            | Male   | Log-transformed SEV scalar: Asbestosis | X        |         |         | X        |         |         |
| Asbestosis                            | Male   | Cumulative Cigarettes (5 Years)        | X        |         |         |          | X       |         |
| Asbestosis                            | Male   | Education (years per capita)           |          |         | X       |          |         | X       |
| Asbestosis                            | Male   | LDI (I\$ per capita)                   |          |         | X       |          |         | X       |
| Asbestosis                            | Male   | Smoking Prevalence                     | X        |         |         |          | X       |         |
| Asbestosis                            | Male   | Smoking Prevalence                     | X        |         |         |          | X       |         |
| Asbestosis                            | Male   | Elevation 500 to 1500m (proportion)    |          | X       |         |          | X       |         |
| Asbestosis                            | Male   | Elevation Over 1500m (proportion)      |          | X       |         |          | X       |         |
| Asbestosis                            | Male   | Socio-demographic Index                |          |         | X       |          |         | X       |
| Asbestosis                            | Female | Log-transformed SEV scalar: Asbestosis | X        |         |         | X        |         |         |
| Asbestosis                            | Female | Cumulative Cigarettes (5 Years)        | X        |         |         |          | X       |         |
| Asbestosis                            | Female | Education (years per capita)           |          |         | X       |          |         | X       |
| Asbestosis                            | Female | LDI (I\$ per capita)                   |          |         | X       |          |         | X       |
| Asbestosis                            | Female | Smoking Prevalence                     | X        |         |         |          | X       |         |
| Asbestosis                            | Female | Elevation 500 to 1500m (proportion)    |          | X       |         |          | X       |         |
| Asbestosis                            | Female | Elevation Over 1500m (proportion)      |          | X       |         |          | X       |         |
| Asbestosis                            | Female | Socio-demographic Index                |          |         | X       |          |         | X       |
| Coal workers pneumoconiosis           | Female | Socio-demographic Index                |          |         | X       |          |         | X       |
| Coal workers pneumoconiosis           | Female | Cumulative Cigarettes (5 Years)        | X        |         |         |          | X       |         |
| Coal workers pneumoconiosis           | Female | Log-transformed SEV scalar: Coal W     | X        |         |         | X        |         |         |
| Coal workers pneumoconiosis           | Female | Education (years per capita)           |          |         | X       |          |         | X       |
| Coal workers pneumoconiosis           | Female | LDI (I\$ per capita)                   |          |         | X       |          |         | X       |
| Coal workers pneumoconiosis           | Female | Smoking Prevalence                     | X        |         |         |          | X       |         |
| Coal workers pneumoconiosis           | Female | Elevation 500 to 1500m (proportion)    |          | X       |         |          | X       |         |
| Coal workers pneumoconiosis           | Female | Elevation Over 1500m (proportion)      |          | X       |         |          | X       |         |
| Coal workers pneumoconiosis           | Male   | Socio-demographic Index                |          |         | X       |          |         | X       |
| Coal workers pneumoconiosis           | Male   | Cumulative Cigarettes (5 Years)        | X        |         |         |          | X       |         |
| Coal workers pneumoconiosis           | Male   | Log-transformed SEV scalar: Coal W     | X        |         |         | X        |         |         |
| Coal workers pneumoconiosis           | Male   | Education (years per capita)           |          |         | X       |          |         | X       |
| Coal workers pneumoconiosis           | Male   | LDI (I\$ per capita)                   |          |         | X       |          |         | X       |
| Coal workers pneumoconiosis           | Male   | Smoking Prevalence                     | X        |         |         |          | X       |         |
| Coal workers pneumoconiosis           | Male   | Elevation 500 to 1500m (proportion)    |          | X       |         |          | X       |         |
| Coal workers pneumoconiosis           | Male   | Elevation Over 1500m (proportion)      |          | X       |         |          | X       |         |
| Other pneumoconiosis                  | Male   | Socio-demographic Index                |          |         | X       |          |         | X       |
| Other pneumoconiosis                  | Male   | Cumulative Cigarettes (5 Years)        | X        |         |         |          | X       |         |
| Other pneumoconiosis                  | Male   | Log-transformed SEV scalar: Oth Pneum  | X        |         |         | X        |         |         |
| Other pneumoconiosis                  | Male   | Education (years per capita)           |          |         | X       |          |         | X       |
| Other pneumoconiosis                  | Male   | LDI (I\$ per capita)                   |          |         | X       |          |         | X       |
| Other pneumoconiosis                  | Male   | Smoking Prevalence                     | X        |         |         |          | X       |         |
| Other pneumoconiosis                  | Male   | Elevation 500 to 1500m (proportion)    |          | X       |         |          | X       |         |
| Other pneumoconiosis                  | Male   | Elevation Over 1500m (proportion)      |          | X       |         |          | X       |         |
| Other pneumoconiosis                  | Female | Socio-demographic Index                |          |         | X       |          |         | X       |

| Cause                                               | Sex    | Covariate                                           | GBD 2015 |         |         | GBD 2016 |         |         |
|-----------------------------------------------------|--------|-----------------------------------------------------|----------|---------|---------|----------|---------|---------|
|                                                     |        |                                                     | Level 1  | Level 2 | Level 3 | Level 1  | Level 2 | Level 3 |
| Other pneumoconiosis                                | Female | Cumulative Cigarettes (5 Years)                     | X        |         |         |          | X       |         |
| Other pneumoconiosis                                | Female | Log-transformed SEV scalar: Oth Pneum               | X        |         |         | X        |         |         |
| Other pneumoconiosis                                | Female | Education (years per capita)                        |          |         | X       |          |         | X       |
| Other pneumoconiosis                                | Female | LDI (IS per capita)                                 |          |         | X       |          |         | X       |
| Other pneumoconiosis                                | Female | Smoking Prevalence                                  | X        |         |         |          | X       |         |
| Other pneumoconiosis                                | Female | Elevation 500 to 1500m (proportion)                 |          | X       |         |          | X       |         |
| Other pneumoconiosis                                | Female | Elevation Over 1500m (proportion)                   |          | X       |         |          | X       |         |
| Asthma                                              | Male   | Cumulative Cigarettes (10 Years)                    | X        |         |         | X        |         |         |
| Asthma                                              | Male   | Cumulative Cigarettes (5 Years)                     | X        |         |         | X        |         |         |
| Asthma                                              | Male   | Education (years per capita)                        |          |         | X       |          |         | X       |
| Asthma                                              | Male   | LDI (IS per capita)                                 |          |         | X       |          |         | X       |
| Asthma                                              | Male   | Outdoor Air Pollution (PM2.5)                       |          | X       |         |          | X       |         |
| Asthma                                              | Male   | Smoking Prevalence                                  |          | X       |         |          | X       |         |
| Asthma                                              | Male   | Log-transformed SEV scalar: Asthma                  | X        |         |         | X        |         |         |
| Asthma                                              | Male   | Socio-demographic Index                             |          |         | X       |          |         | X       |
| Asthma                                              | Female | Cumulative Cigarettes (10 Years)                    | X        |         |         | X        |         |         |
| Asthma                                              | Female | Cumulative Cigarettes (5 Years)                     | X        |         |         | X        |         |         |
| Asthma                                              | Female | Education (years per capita)                        |          |         | X       |          |         | X       |
| Asthma                                              | Female | LDI (IS per capita)                                 |          |         | X       |          |         | X       |
| Asthma                                              | Female | Outdoor Air Pollution (PM2.5)                       |          | X       |         |          | X       |         |
| Asthma                                              | Female | Smoking Prevalence                                  |          | X       |         |          | X       |         |
| Asthma                                              | Female | Log-transformed SEV scalar: Asthma                  | X        |         |         | X        |         |         |
| Asthma                                              | Female | Socio-demographic Index                             |          |         | X       |          |         | X       |
| Interstitial lung disease and pulmonary sarcoidosis | Female | Socio-demographic Index                             |          |         | X       |          |         | X       |
| Interstitial lung disease and pulmonary sarcoidosis | Female | Smoking Prevalence                                  | X        |         |         | X        |         |         |
| Interstitial lung disease and pulmonary sarcoidosis | Female | Log-transformed SEV scalar: ILD                     | X        |         |         | X        |         |         |
| Interstitial lung disease and pulmonary sarcoidosis | Female | Education (years per capita)                        |          |         | X       |          |         | X       |
| Interstitial lung disease and pulmonary sarcoidosis | Female | LDI (IS per capita)                                 |          |         | X       |          |         | X       |
| Interstitial lung disease and pulmonary sarcoidosis | Female | Elevation Over 1500m (proportion)                   |          | X       |         |          | X       |         |
| Interstitial lung disease and pulmonary sarcoidosis | Female | Elevation 500 to 1500m (proportion)                 |          | X       |         |          | X       |         |
| Interstitial lung disease and pulmonary sarcoidosis | Female | Cumulative Cigarettes (5 Years)                     | X        |         |         | X        |         |         |
| Interstitial lung disease and pulmonary sarcoidosis | Female | Outdoor Air Pollution (PM2.5)                       | X        |         |         | X        |         |         |
| Interstitial lung disease and pulmonary sarcoidosis | Female | Outdoor Air Pollution (PM2.5)                       | X        |         |         | X        |         |         |
| Interstitial lung disease and pulmonary sarcoidosis | Female | Outdoor Air Pollution (PM2.5)                       |          | X       |         |          | X       |         |
| Interstitial lung disease and pulmonary sarcoidosis | Female | Outdoor Air Pollution (PM2.5)                       |          | X       |         |          | X       |         |
| Interstitial lung disease and pulmonary sarcoidosis | Female | Population Density (over 1000 ppl/sqkm, proportion) |          | X       |         |          | X       |         |
| Interstitial lung disease and pulmonary sarcoidosis | Male   | Socio-demographic Index                             |          |         | X       |          |         | X       |
| Interstitial lung disease and pulmonary sarcoidosis | Male   | Smoking Prevalence                                  | X        |         |         | X        |         |         |
| Interstitial lung disease and pulmonary sarcoidosis | Male   | Log-transformed SEV scalar: ILD                     | X        |         |         | X        |         |         |
| Interstitial lung disease and pulmonary sarcoidosis | Male   | Education (years per capita)                        |          |         | X       |          |         | X       |
| Interstitial lung disease and pulmonary sarcoidosis | Male   | LDI (IS per capita)                                 |          |         | X       |          |         | X       |
| Interstitial lung disease and pulmonary sarcoidosis | Male   | Elevation Over 1500m (proportion)                   |          | X       |         |          | X       |         |
| Interstitial lung disease and pulmonary sarcoidosis | Male   | Elevation 500 to 1500m (proportion)                 |          | X       |         |          | X       |         |
| Interstitial lung disease and pulmonary sarcoidosis | Male   | Cumulative Cigarettes (5 Years)                     | X        |         |         | X        |         |         |
| Interstitial lung disease and pulmonary sarcoidosis | Male   | Outdoor Air Pollution (PM2.5)                       |          | X       |         |          | X       |         |
| Interstitial lung disease and pulmonary sarcoidosis | Male   | Population Density (over 1000 ppl/sqkm, proportion) |          | X       |         |          | X       |         |
| Other chronic respiratory diseases                  | Female | Socio-demographic Index                             |          |         | X       |          |         | X       |
| Other chronic respiratory diseases                  | Female | Cumulative Cigarettes (5 Years)                     | X        |         |         | X        |         |         |
| Other chronic respiratory diseases                  | Female | Elevation Over 1500m (proportion)                   |          | X       |         |          | X       |         |
| Other chronic respiratory diseases                  | Female | Education (years per capita)                        |          |         | X       |          |         | X       |
| Other chronic respiratory diseases                  | Female | Log-transformed SEV scalar: Oth Resp                | X        |         |         | X        |         |         |
| Other chronic respiratory diseases                  | Female | LDI (IS per capita)                                 |          |         | X       |          |         | X       |
| Other chronic respiratory diseases                  | Female | Elevation 500 to 1500m (proportion)                 |          | X       |         |          | X       |         |
| Other chronic respiratory diseases                  | Female | Smoking Prevalence                                  | X        |         |         | X        |         |         |
| Other chronic respiratory diseases                  | Female | Outdoor Air Pollution (PM2.5)                       | X        |         |         | X        |         |         |
| Other chronic respiratory diseases                  | Female | Population Density (over 1000 ppl/sqkm, proportion) |          | X       |         |          | X       |         |
| Other chronic respiratory diseases                  | Male   | Socio-demographic Index                             |          |         | X       |          |         | X       |
| Other chronic respiratory diseases                  | Male   | Cumulative Cigarettes (5 Years)                     | X        |         |         | X        |         |         |
| Other chronic respiratory diseases                  | Male   | Elevation Over 1500m (proportion)                   |          | X       |         |          | X       |         |
| Other chronic respiratory diseases                  | Male   | Education (years per capita)                        |          |         | X       |          |         | X       |
| Other chronic respiratory diseases                  | Male   | Log-transformed SEV scalar: Oth Resp                | X        |         |         | X        |         |         |
| Other chronic respiratory diseases                  | Male   | LDI (IS per capita)                                 |          |         | X       |          |         | X       |
| Other chronic respiratory diseases                  | Male   | Elevation 500 to 1500m (proportion)                 |          | X       |         |          | X       |         |
| Other chronic respiratory diseases                  | Male   | Smoking Prevalence                                  | X        |         |         | X        |         |         |
| Other chronic respiratory diseases                  | Male   | Outdoor Air Pollution (PM2.5)                       | X        |         |         | X        |         |         |
| Other chronic respiratory diseases                  | Male   | Population Density (over 1000 ppl/sqkm, proportion) |          | X       |         |          | X       |         |
| Cirrhosis and other chronic liver diseases          | Male   | Alcohol (liters per capita)                         | X        |         |         | X        |         |         |
| Cirrhosis and other chronic liver diseases          | Male   | Diabetes Age-Standardized Prevalence (proportion)   |          | X       |         |          | X       |         |
| Cirrhosis and other chronic liver diseases          | Male   | Education (years per capita)                        |          |         | X       |          |         | X       |
| Cirrhosis and other chronic liver diseases          | Male   | Health System Access 2 (unitless)                   | X        |         |         |          |         | X       |
| Cirrhosis and other chronic liver diseases          | Male   | LDI (IS per capita)                                 |          |         | X       |          |         | X       |
| Cirrhosis and other chronic liver diseases          | Male   | Mean BMI                                            |          | X       |         |          | X       |         |
| Cirrhosis and other chronic liver diseases          | Male   | Schistosomiasis Prevalence (proportion)             | X        |         |         | X        |         |         |
| Cirrhosis and other chronic liver diseases          | Male   | Socio-demographic Index                             |          |         | X       |          |         | X       |
| Cirrhosis and other chronic liver diseases          | Male   | Hepatitis B (HBsAg) Seroprevalence                  | X        |         |         | X        |         |         |
| Cirrhosis and other chronic liver diseases          | Male   | Hepatitis C (IgG) Seroprevalence                    | X        |         |         | X        |         |         |
| Cirrhosis and other chronic liver diseases          | Female | Alcohol (liters per capita)                         | X        |         |         | X        |         |         |
| Cirrhosis and other chronic liver diseases          | Female | Diabetes Age-Standardized Prevalence (proportion)   |          | X       |         |          | X       |         |
| Cirrhosis and other chronic liver diseases          | Female | Education (years per capita)                        |          |         | X       |          |         | X       |
| Cirrhosis and other chronic liver diseases          | Female | Health System Access 2 (unitless)                   | X        |         |         |          |         | X       |
| Cirrhosis and other chronic liver diseases          | Female | LDI (IS per capita)                                 |          |         | X       |          |         | X       |
| Cirrhosis and other chronic liver diseases          | Female | Mean BMI                                            |          | X       |         |          | X       |         |
| Cirrhosis and other chronic liver diseases          | Female | Schistosomiasis Prevalence (proportion)             | X        |         |         | X        |         |         |
| Cirrhosis and other chronic liver diseases          | Female | Socio-demographic Index                             |          |         | X       |          |         | X       |
| Cirrhosis and other chronic liver diseases          | Female | Hepatitis B (HBsAg) Seroprevalence                  | X        |         |         | X        |         |         |



| Cause                                      | Sex    | Covariate                             | GBD 2015 |         |         | GBD 2016 |         |         |
|--------------------------------------------|--------|---------------------------------------|----------|---------|---------|----------|---------|---------|
|                                            |        |                                       | Level 1  | Level 2 | Level 3 | Level 1  | Level 2 | Level 3 |
| Cirrhosis and other chronic liver diseases | Female | Hepatitis C (IgG) Seroprevalence      | X        |         |         | X        |         |         |
| Digestive diseases                         | Female | Alcohol (liters per capita)           | X        |         |         | X        |         |         |
| Digestive diseases                         | Female | Cumulative Cigarettes (5 Years)       | X        |         |         | X        |         |         |
| Digestive diseases                         | Female | Education (years per capita)          |          |         | X       |          |         | X       |
| Digestive diseases                         | Female | LDI (I\$ per capita)                  |          |         | X       |          |         | X       |
| Digestive diseases                         | Female | Sanitation (proportion with access)   | X        |         |         | X        |         |         |
| Digestive diseases                         | Female | Socio-demographic Index               |          |         | X       |          |         | X       |
| Digestive diseases                         | Female | fruits adjusted(g)                    |          | X       |         |          | X       |         |
| Digestive diseases                         | Female | red meats adjusted(g)                 |          | X       |         |          | X       |         |
| Digestive diseases                         | Male   | Alcohol (liters per capita)           | X        |         |         | X        |         |         |
| Digestive diseases                         | Male   | Cumulative Cigarettes (5 Years)       | X        |         |         | X        |         |         |
| Digestive diseases                         | Male   | Education (years per capita)          |          |         | X       |          |         | X       |
| Digestive diseases                         | Male   | LDI (I\$ per capita)                  |          |         | X       |          |         | X       |
| Digestive diseases                         | Male   | Sanitation (proportion with access)   | X        |         |         | X        |         |         |
| Digestive diseases                         | Male   | Socio-demographic Index               |          |         | X       |          |         | X       |
| Digestive diseases                         | Male   | fruits adjusted(g)                    |          | X       |         |          | X       |         |
| Digestive diseases                         | Male   | red meats adjusted(g)                 |          | X       |         |          | X       |         |
| Peptic ulcer disease                       | Female | Alcohol (liters per capita)           | X        |         |         | X        |         |         |
| Peptic ulcer disease                       | Female | Cumulative Cigarettes (10 Years)      | X        |         |         | X        |         |         |
| Peptic ulcer disease                       | Female | Cumulative Cigarettes (5 Years)       | X        |         |         | X        |         |         |
| Peptic ulcer disease                       | Female | LDI (I\$ per capita)                  |          |         | X       |          |         | X       |
| Peptic ulcer disease                       | Female | Sanitation (proportion with access)   |          | X       |         |          | X       |         |
| Peptic ulcer disease                       | Female | Smoking Prevalence                    | X        |         |         | X        |         |         |
| Peptic ulcer disease                       | Female | Maternal education (years per capita) |          |         | X       |          |         | X       |
| Peptic ulcer disease                       | Female | Socio-demographic Index               |          |         | X       |          |         | X       |
| Peptic ulcer disease                       | Female | vegetables adjusted(g)                |          | X       |         |          | X       |         |
| Peptic ulcer disease                       | Male   | Alcohol (liters per capita)           | X        |         |         | X        |         |         |
| Peptic ulcer disease                       | Male   | Cumulative Cigarettes (10 Years)      | X        |         |         | X        |         |         |
| Peptic ulcer disease                       | Male   | Cumulative Cigarettes (5 Years)       | X        |         |         | X        |         |         |
| Peptic ulcer disease                       | Male   | LDI (I\$ per capita)                  |          |         | X       |          |         | X       |
| Peptic ulcer disease                       | Male   | Sanitation (proportion with access)   |          | X       |         |          | X       |         |
| Peptic ulcer disease                       | Male   | Smoking Prevalence                    | X        |         |         | X        |         |         |
| Peptic ulcer disease                       | Male   | Maternal education (years per capita) |          |         | X       |          |         | X       |
| Peptic ulcer disease                       | Male   | Socio-demographic Index               |          |         | X       |          |         | X       |
| Peptic ulcer disease                       | Male   | vegetables adjusted(g)                |          | X       |         |          | X       |         |
| Gastritis and duodenitis                   | Male   | Alcohol (liters per capita)           | X        |         |         | X        |         |         |
| Gastritis and duodenitis                   | Male   | Cumulative Cigarettes (10 Years)      | X        |         |         | X        |         |         |
| Gastritis and duodenitis                   | Male   | Cumulative Cigarettes (5 Years)       | X        |         |         | X        |         |         |
| Gastritis and duodenitis                   | Male   | Education (years per capita)          |          |         | X       |          |         | X       |
| Gastritis and duodenitis                   | Male   | LDI (I\$ per capita)                  |          |         | X       |          |         | X       |
| Gastritis and duodenitis                   | Male   | Sanitation (proportion with access)   |          | X       |         |          | X       |         |
| Gastritis and duodenitis                   | Male   | Smoking Prevalence                    | X        |         |         | X        |         |         |
| Gastritis and duodenitis                   | Male   | Socio-demographic Index               |          |         | X       |          |         | X       |
| Gastritis and duodenitis                   | Male   | vegetables adjusted(g)                |          | X       |         |          | X       |         |
| Gastritis and duodenitis                   | Female | Alcohol (liters per capita)           | X        |         |         | X        |         |         |
| Gastritis and duodenitis                   | Female | Cumulative Cigarettes (10 Years)      | X        |         |         | X        |         |         |
| Gastritis and duodenitis                   | Female | Cumulative Cigarettes (5 Years)       | X        |         |         | X        |         |         |
| Gastritis and duodenitis                   | Female | Education (years per capita)          |          |         | X       |          |         | X       |
| Gastritis and duodenitis                   | Female | LDI (I\$ per capita)                  |          |         | X       |          |         | X       |
| Gastritis and duodenitis                   | Female | Sanitation (proportion with access)   |          | X       |         |          | X       |         |
| Gastritis and duodenitis                   | Female | Smoking Prevalence                    | X        |         |         | X        |         |         |
| Gastritis and duodenitis                   | Female | Socio-demographic Index               |          |         | X       |          |         | X       |
| Gastritis and duodenitis                   | Female | vegetables adjusted(g)                |          | X       |         |          | X       |         |
| Appendicitis                               | Female | Education (years per capita)          |          |         | X       |          |         | X       |
| Appendicitis                               | Female | LDI (I\$ per capita)                  |          |         | X       |          |         | X       |
| Appendicitis                               | Female | Health System Access (capped)         |          | X       |         |          |         | X       |
| Appendicitis                               | Female | Socio-demographic Index               |          |         | X       |          |         | X       |
| Appendicitis                               | Female | fruits adjusted(g)                    |          | X       |         |          | X       |         |
| Appendicitis                               | Female | vegetables adjusted(g)                |          | X       |         |          | X       |         |
| Appendicitis                               | Male   | Education (years per capita)          |          |         | X       |          |         | X       |
| Appendicitis                               | Male   | LDI (I\$ per capita)                  |          |         | X       |          |         | X       |
| Appendicitis                               | Male   | Health System Access (capped)         |          | X       |         |          |         | X       |
| Appendicitis                               | Male   | Socio-demographic Index               |          |         | X       |          |         | X       |
| Appendicitis                               | Male   | fruits adjusted(g)                    |          | X       |         |          | X       |         |
| Appendicitis                               | Male   | vegetables adjusted(g)                |          | X       |         |          | X       |         |
| Paralytic ileus and intestinal obstruction | Female | Education (years per capita)          |          |         | X       |          |         | X       |
| Paralytic ileus and intestinal obstruction | Female | LDI (I\$ per capita)                  |          |         | X       |          |         | X       |
| Paralytic ileus and intestinal obstruction | Female | Health System Access (capped)         | X        |         |         |          |         | X       |
| Paralytic ileus and intestinal obstruction | Female | Socio-demographic Index               |          |         | X       |          |         | X       |
| Paralytic ileus and intestinal obstruction | Female | fruits adjusted(g)                    |          | X       |         |          | X       |         |
| Paralytic ileus and intestinal obstruction | Female | vegetables adjusted(g)                |          | X       |         |          | X       |         |
| Paralytic ileus and intestinal obstruction | Male   | Education (years per capita)          |          |         | X       |          |         | X       |
| Paralytic ileus and intestinal obstruction | Male   | LDI (I\$ per capita)                  |          |         | X       |          |         | X       |
| Paralytic ileus and intestinal obstruction | Male   | Health System Access (capped)         | X        |         |         |          |         | X       |
| Paralytic ileus and intestinal obstruction | Male   | Socio-demographic Index               |          |         | X       |          |         | X       |
| Paralytic ileus and intestinal obstruction | Male   | fruits adjusted(g)                    |          | X       |         |          | X       |         |
| Paralytic ileus and intestinal obstruction | Male   | vegetables adjusted(g)                |          | X       |         |          | X       |         |
| Inguinal, femoral, and abdominal hernia    | Female | Education (years per capita)          |          |         | X       |          |         | X       |
| Inguinal, femoral, and abdominal hernia    | Female | LDI (I\$ per capita)                  |          |         | X       |          |         | X       |
| Inguinal, femoral, and abdominal hernia    | Female | Socio-demographic Index               |          |         | X       |          |         | X       |
| Inguinal, femoral, and abdominal hernia    | Male   | Education (years per capita)          |          |         | X       |          |         | X       |
| Inguinal, femoral, and abdominal hernia    | Male   | LDI (I\$ per capita)                  |          |         | X       |          |         | X       |
| Inguinal, femoral, and abdominal hernia    | Male   | Socio-demographic Index               |          |         | X       |          |         | X       |
| Inflammatory bowel disease                 | Male   | Education (years per capita)          |          |         | X       |          |         | X       |
| Inflammatory bowel disease                 | Male   | LDI (I\$ per capita)                  |          |         | X       |          |         | X       |

| Cause                            | Sex    | Covariate                                         | GBD 2015 |         |         | GBD 2016 |         |         |
|----------------------------------|--------|---------------------------------------------------|----------|---------|---------|----------|---------|---------|
|                                  |        |                                                   | Level 1  | Level 2 | Level 3 | Level 1  | Level 2 | Level 3 |
| Inflammatory bowel disease       | Male   | Latitude 15 to 30 (proportion)                    |          | X       |         |          | X       |         |
| Inflammatory bowel disease       | Male   | Latitude 30 to 45 (proportion)                    |          | X       |         |          | X       |         |
| Inflammatory bowel disease       | Male   | Latitude Over 45 (proportion)                     |          | X       |         |          | X       |         |
| Inflammatory bowel disease       | Male   | Socio-demographic Index                           |          |         | X       |          |         | X       |
| Inflammatory bowel disease       | Male   | fruits adjusted(g)                                | X        |         |         | X        |         |         |
| Inflammatory bowel disease       | Male   | red meats adjusted(g)                             | X        |         |         | X        |         |         |
| Inflammatory bowel disease       | Male   | vegetables adjusted(g)                            | X        |         |         | X        |         |         |
| Inflammatory bowel disease       | Female | Education (years per capita)                      |          |         | X       |          |         | X       |
| Inflammatory bowel disease       | Female | LDI (I\$ per capita)                              |          |         | X       |          |         | X       |
| Inflammatory bowel disease       | Female | Latitude 15 to 30 (proportion)                    |          | X       |         |          | X       |         |
| Inflammatory bowel disease       | Female | Latitude 30 to 45 (proportion)                    |          | X       |         |          | X       |         |
| Inflammatory bowel disease       | Female | Latitude Over 45 (proportion)                     |          | X       |         |          | X       |         |
| Inflammatory bowel disease       | Female | Socio-demographic Index                           |          |         | X       |          |         | X       |
| Inflammatory bowel disease       | Female | fruits adjusted(g)                                | X        |         |         | X        |         |         |
| Inflammatory bowel disease       | Female | red meats adjusted(g)                             | X        |         |         | X        |         |         |
| Inflammatory bowel disease       | Female | vegetables adjusted(g)                            | X        |         |         | X        |         |         |
| Vascular intestinal disorders    | Male   | Alcohol (liters per capita)                       |          | X       |         |          | X       |         |
| Vascular intestinal disorders    | Male   | Diabetes Fasting Plasma Glucose (mmol/L)          | X        |         |         | X        |         |         |
| Vascular intestinal disorders    | Male   | Diabetes Age-Standardized Prevalence (proportion) | X        |         |         | X        |         |         |
| Vascular intestinal disorders    | Male   | Education (years per capita)                      |          |         | X       |          |         | X       |
| Vascular intestinal disorders    | Male   | LDI (I\$ per capita)                              |          |         | X       |          |         | X       |
| Vascular intestinal disorders    | Male   | Cholesterol (total, mean per capita)              | X        |         |         | X        |         |         |
| Vascular intestinal disorders    | Male   | Systolic Blood Pressure (mmHg)                    | X        |         |         | X        |         |         |
| Vascular intestinal disorders    | Male   | Latitude Over 45 (proportion)                     |          |         | X       |          |         | X       |
| Vascular intestinal disorders    | Male   | Socio-demographic Index                           |          |         | X       |          |         | X       |
| Vascular intestinal disorders    | Male   | fruits adjusted(g)                                |          | X       |         |          | X       |         |
| Vascular intestinal disorders    | Male   | vegetables adjusted(g)                            |          | X       |         |          | X       |         |
| Vascular intestinal disorders    | Female | Alcohol (liters per capita)                       |          | X       |         |          | X       |         |
| Vascular intestinal disorders    | Female | Diabetes Fasting Plasma Glucose (mmol/L)          | X        |         |         | X        |         |         |
| Vascular intestinal disorders    | Female | Diabetes Age-Standardized Prevalence (proportion) | X        |         |         | X        |         |         |
| Vascular intestinal disorders    | Female | Education (years per capita)                      |          |         | X       |          |         | X       |
| Vascular intestinal disorders    | Female | LDI (I\$ per capita)                              |          |         | X       |          |         | X       |
| Vascular intestinal disorders    | Female | Cholesterol (total, mean per capita)              | X        |         |         | X        |         |         |
| Vascular intestinal disorders    | Female | Systolic Blood Pressure (mmHg)                    | X        |         |         | X        |         |         |
| Vascular intestinal disorders    | Female | Latitude Over 45 (proportion)                     |          |         | X       |          |         | X       |
| Vascular intestinal disorders    | Female | Socio-demographic Index                           |          |         | X       |          |         | X       |
| Vascular intestinal disorders    | Female | fruits adjusted(g)                                |          | X       |         |          | X       |         |
| Vascular intestinal disorders    | Female | vegetables adjusted(g)                            |          | X       |         |          | X       |         |
| Gallbladder and biliary diseases | Female | Alcohol (liters per capita)                       |          | X       |         |          | X       |         |
| Gallbladder and biliary diseases | Female | Education (years per capita)                      |          |         | X       |          |         | X       |
| Gallbladder and biliary diseases | Female | LDI (I\$ per capita)                              |          |         | X       |          |         | X       |
| Gallbladder and biliary diseases | Female | Mean BMI                                          | X        |         |         | X        |         |         |
| Gallbladder and biliary diseases | Female | Population Over 65 (proportion)                   |          | X       |         |          | X       |         |
| Gallbladder and biliary diseases | Female | Socio-demographic Index                           |          |         | X       |          |         | X       |
| Gallbladder and biliary diseases | Female | red meats adjusted(g)                             |          | X       |         |          | X       |         |
| Gallbladder and biliary diseases | Male   | Alcohol (liters per capita)                       |          | X       |         |          | X       |         |
| Gallbladder and biliary diseases | Male   | Education (years per capita)                      |          |         | X       |          |         | X       |
| Gallbladder and biliary diseases | Male   | LDI (I\$ per capita)                              |          |         | X       |          |         | X       |
| Gallbladder and biliary diseases | Male   | Mean BMI                                          | X        |         |         | X        |         |         |
| Gallbladder and biliary diseases | Male   | Population Over 65 (proportion)                   |          | X       |         |          | X       |         |
| Gallbladder and biliary diseases | Male   | Health System Access (capped)                     | X        |         |         |          | X       |         |
| Gallbladder and biliary diseases | Male   | Socio-demographic Index                           |          |         | X       |          |         | X       |
| Gallbladder and biliary diseases | Male   | red meats adjusted(g)                             |          | X       |         |          | X       |         |
| Pancreatitis                     | Male   | Alcohol (liters per capita)                       | X        |         |         | X        |         |         |
| Pancreatitis                     | Male   | Education (years per capita)                      |          |         | X       |          |         | X       |
| Pancreatitis                     | Male   | LDI (I\$ per capita)                              |          |         | X       |          |         | X       |
| Pancreatitis                     | Male   | Mean BMI                                          |          | X       |         |          | X       |         |
| Pancreatitis                     | Male   | Health System Access (capped)                     |          | X       |         |          | X       |         |
| Pancreatitis                     | Male   | Log-transformed SEV scalar: Pancreatit            | X        |         |         | X        |         |         |
| Pancreatitis                     | Male   | Socio-demographic Index                           |          |         | X       |          |         | X       |
| Pancreatitis                     | Female | Alcohol (liters per capita)                       | X        |         |         | X        |         |         |
| Pancreatitis                     | Female | Education (years per capita)                      |          |         | X       |          |         | X       |
| Pancreatitis                     | Female | LDI (I\$ per capita)                              |          |         | X       |          |         | X       |
| Pancreatitis                     | Female | Mean BMI                                          |          | X       |         |          | X       |         |
| Pancreatitis                     | Female | Log-transformed SEV scalar: Pancreatit            | X        |         |         | X        |         |         |
| Pancreatitis                     | Female | Socio-demographic Index                           |          |         | X       |          |         | X       |
| Other digestive diseases         | Female | Alcohol (liters per capita)                       |          | X       |         |          | X       |         |
| Other digestive diseases         | Female | Cumulative Cigarettes (10 Years)                  | X        |         |         |          | X       |         |
| Other digestive diseases         | Female | Cumulative Cigarettes (5 Years)                   | X        |         |         |          | X       |         |
| Other digestive diseases         | Female | Diabetes Age-Standardized Prevalence (proportion) |          | X       |         |          | X       |         |
| Other digestive diseases         | Female | Education (years per capita)                      |          |         | X       |          |         | X       |
| Other digestive diseases         | Female | Health System Access 2 (unifless)                 |          | X       |         |          |         | X       |
| Other digestive diseases         | Female | LDI (I\$ per capita)                              |          |         | X       |          |         | X       |
| Other digestive diseases         | Female | Mean BMI                                          |          | X       |         |          | X       |         |
| Other digestive diseases         | Female | Sanitation (proportion with access)               |          | X       |         |          | X       |         |
| Other digestive diseases         | Female | Smoking Prevalence                                | X        |         |         | X        |         |         |
| Other digestive diseases         | Female | Improved Water Source (proportion with access)    |          | X       |         |          | X       |         |
| Other digestive diseases         | Female | Socio-demographic Index                           |          |         | X       |          |         | X       |
| Other digestive diseases         | Female | fruits adjusted(g)                                |          | X       |         |          | X       |         |
| Other digestive diseases         | Female | red meats adjusted(g)                             |          | X       |         |          | X       |         |
| Other digestive diseases         | Female | vegetables adjusted(g)                            |          | X       |         |          | X       |         |
| Other digestive diseases         | Male   | Alcohol (liters per capita)                       | X        |         |         | X        |         |         |
| Other digestive diseases         | Male   | Cumulative Cigarettes (10 Years)                  | X        |         |         | X        |         |         |
| Other digestive diseases         | Male   | Cumulative Cigarettes (5 Years)                   | X        |         |         | X        |         |         |
| Other digestive diseases         | Male   | Diabetes Age-Standardized Prevalence (proportion) |          | X       |         |          | X       |         |

| Cause                        | Sex    | Covariate                                              | GBD 2015 |         |         | GBD 2016 |         |         |
|------------------------------|--------|--------------------------------------------------------|----------|---------|---------|----------|---------|---------|
|                              |        |                                                        | Level 1  | Level 2 | Level 3 | Level 1  | Level 2 | Level 3 |
| Other digestive diseases     | Male   | Education (years per capita)                           |          |         | X       |          |         | X       |
| Other digestive diseases     | Male   | Health System Access 2 (unitless)                      |          | X       |         |          |         | X       |
| Other digestive diseases     | Male   | LDI (US\$ per capita)                                  |          |         | X       |          |         | X       |
| Other digestive diseases     | Male   | Mean BMI                                               |          | X       |         |          | X       |         |
| Other digestive diseases     | Male   | Sanitation (proportion with access)                    |          | X       |         |          | X       |         |
| Other digestive diseases     | Male   | Smoking Prevalence                                     | X        |         |         | X        |         |         |
| Other digestive diseases     | Male   | Improved Water Source (proportion with access)         |          | X       |         |          | X       |         |
| Other digestive diseases     | Male   | Socio-demographic Index                                |          |         | X       |          |         | X       |
| Other digestive diseases     | Male   | fruits adjusted(g)                                     |          | X       |         |          | X       |         |
| Other digestive diseases     | Male   | red meats adjusted(g)                                  |          | X       |         |          | X       |         |
| Other digestive diseases     | Male   | vegetables adjusted(g)                                 |          | X       |         |          | X       |         |
| Epilepsy                     | Female | Cumulative Cigarettes (10 Years)                       |          |         | X       |          |         | X       |
| Epilepsy                     | Female | Socio-demographic Index                                |          |         | X       |          |         | X       |
| Epilepsy                     | Female | Cumulative Cigarettes (5 Years)                        |          |         | X       |          |         | X       |
| Epilepsy                     | Female | Education (years per capita)                           |          |         | X       |          |         | X       |
| Epilepsy                     | Female | LDI (US\$ per capita)                                  |          |         | X       |          |         | X       |
| Epilepsy                     | Female | Log-transformed SEV scalar: Epilepsy                   | X        |         |         | X        |         |         |
| Epilepsy                     | Female | Pig Meat (kg per capita)                               | X        |         |         | X        |         |         |
| Epilepsy                     | Female | Systolic Blood Pressure (mmHg)                         | X        |         |         | X        |         |         |
| Epilepsy                     | Female | Mean BMI                                               |          | X       |         |          | X       |         |
| Epilepsy                     | Female | Cholesterol (total, mean per capita)                   |          | X       |         |          | X       |         |
| Epilepsy                     | Female | Pigs (per capita)                                      | X        |         |         | X        |         |         |
| Epilepsy                     | Male   | Cumulative Cigarettes (10 Years)                       |          |         | X       |          |         | X       |
| Epilepsy                     | Male   | Socio-demographic Index                                |          |         | X       |          |         | X       |
| Epilepsy                     | Male   | Cumulative Cigarettes (5 Years)                        |          |         | X       |          |         | X       |
| Epilepsy                     | Male   | Education (years per capita)                           |          |         | X       |          |         | X       |
| Epilepsy                     | Male   | LDI (US\$ per capita)                                  |          |         | X       |          |         | X       |
| Epilepsy                     | Male   | Log-transformed SEV scalar: Epilepsy                   | X        |         |         | X        |         |         |
| Epilepsy                     | Male   | Pig Meat (kg per capita)                               | X        |         |         | X        |         |         |
| Epilepsy                     | Male   | Systolic Blood Pressure (mmHg)                         | X        |         |         | X        |         |         |
| Epilepsy                     | Male   | Mean BMI                                               |          | X       |         |          | X       |         |
| Epilepsy                     | Male   | Cholesterol (total, mean per capita)                   |          | X       |         |          | X       |         |
| Epilepsy                     | Male   | Pigs (per capita)                                      | X        |         |         | X        |         |         |
| Multiple sclerosis           | Male   | Cumulative Cigarettes (10 Years)                       |          |         | X       |          |         | X       |
| Multiple sclerosis           | Male   | Socio-demographic Index                                |          |         | X       |          |         | X       |
| Multiple sclerosis           | Male   | Cumulative Cigarettes (5 Years)                        |          |         | X       |          |         | X       |
| Multiple sclerosis           | Male   | Education (years per capita)                           |          |         | X       |          |         | X       |
| Multiple sclerosis           | Male   | LDI (US\$ per capita)                                  |          |         | X       |          |         | X       |
| Multiple sclerosis           | Male   | Absolute value of average latitude                     | X        |         |         | X        |         |         |
| Multiple sclerosis           | Male   | Smoking Prevalence                                     |          |         | X       |          |         | X       |
| Multiple sclerosis           | Male   | Cholesterol (total, mean per capita)                   |          | X       |         |          | X       |         |
| Multiple sclerosis           | Female | Cumulative Cigarettes (10 Years)                       |          |         | X       |          |         | X       |
| Multiple sclerosis           | Female | Socio-demographic Index                                |          |         | X       |          |         | X       |
| Multiple sclerosis           | Female | Cumulative Cigarettes (5 Years)                        |          |         | X       |          |         | X       |
| Multiple sclerosis           | Female | Education (years per capita)                           |          |         | X       |          |         | X       |
| Multiple sclerosis           | Female | LDI (US\$ per capita)                                  |          |         | X       |          |         | X       |
| Multiple sclerosis           | Female | Absolute value of average latitude                     | X        |         |         | X        |         |         |
| Multiple sclerosis           | Female | Smoking Prevalence                                     |          |         | X       |          |         | X       |
| Multiple sclerosis           | Female | Cholesterol (total, mean per capita)                   |          | X       |         |          | X       |         |
| Motor neuron disease         | Male   | Absolute value of average latitude                     |          | X       |         |          | X       |         |
| Motor neuron disease         | Male   | Asbestos production (kg) per capita                    | X        |         |         | X        |         |         |
| Motor neuron disease         | Male   | Education (years per capita)                           |          |         | X       |          |         | X       |
| Motor neuron disease         | Male   | LDI (US\$ per capita)                                  |          |         | X       |          |         | X       |
| Motor neuron disease         | Male   | Cholesterol (total, mean per capita)                   | X        |         |         | X        |         |         |
| Motor neuron disease         | Male   | Sanitation (proportion with access)                    |          | X       |         |          | X       |         |
| Motor neuron disease         | Male   | Improved Water Source (proportion with access)         |          | X       |         |          | X       |         |
| Motor neuron disease         | Male   | Socio-demographic Index                                |          |         | X       |          |         | X       |
| Motor neuron disease         | Female | Absolute value of average latitude                     |          | X       |         |          | X       |         |
| Motor neuron disease         | Female | Asbestos production (kg) per capita                    | X        |         |         | X        |         |         |
| Motor neuron disease         | Female | Education (years per capita)                           |          |         | X       |          |         | X       |
| Motor neuron disease         | Female | LDI (US\$ per capita)                                  |          |         | X       |          |         | X       |
| Motor neuron disease         | Female | Cholesterol (total, mean per capita)                   | X        |         |         | X        |         |         |
| Motor neuron disease         | Female | Sanitation (proportion with access)                    |          | X       |         |          | X       |         |
| Motor neuron disease         | Female | Improved Water Source (proportion with access)         |          | X       |         |          | X       |         |
| Motor neuron disease         | Female | Socio-demographic Index                                |          |         | X       |          |         | X       |
| Other neurological disorders | Male   | Cumulative Cigarettes (10 Years)                       |          |         | X       |          |         | X       |
| Other neurological disorders | Male   | Socio-demographic Index                                |          |         | X       |          |         | X       |
| Other neurological disorders | Male   | Cumulative Cigarettes (5 Years)                        |          |         | X       |          |         | X       |
| Other neurological disorders | Male   | Education (years per capita)                           |          |         | X       |          |         | X       |
| Other neurological disorders | Male   | LDI (US\$ per capita)                                  |          |         | X       |          |         | X       |
| Other neurological disorders | Male   | Pig Meat (kg per capita)                               | X        |         |         | X        |         |         |
| Other neurological disorders | Male   | Animal Fats (kcal per capita)                          |          | X       |         |          | X       |         |
| Other neurological disorders | Male   | Smoking Prevalence                                     |          |         | X       |          |         | X       |
| Other neurological disorders | Male   | Underweight (proportion <2SD weight for age, <5 years) | X        |         |         | X        |         |         |
| Other neurological disorders | Male   | Alcohol (liters per capita)                            |          | X       |         |          | X       |         |
| Other neurological disorders | Male   | Mean BMI                                               | X        |         |         | X        |         |         |
| Other neurological disorders | Male   | Cholesterol (total, mean per capita)                   | X        |         |         | X        |         |         |
| Other neurological disorders | Male   | Population Density (over 1000 ppl/sqkm, proportion)    |          | X       |         |          | X       |         |
| Other neurological disorders | Male   | Systolic Blood Pressure (mmHg)                         | X        |         |         | X        |         |         |
| Other neurological disorders | Female | Cumulative Cigarettes (10 Years)                       |          |         | X       |          |         | X       |
| Other neurological disorders | Female | Socio-demographic Index                                |          |         | X       |          |         | X       |
| Other neurological disorders | Female | Cumulative Cigarettes (5 Years)                        |          |         | X       |          |         | X       |
| Other neurological disorders | Female | Education (years per capita)                           |          |         | X       |          |         | X       |
| Other neurological disorders | Female | LDI (US\$ per capita)                                  |          |         | X       |          |         | X       |
| Other neurological disorders | Female | Pig Meat (kg per capita)                               | X        |         |         | X        |         |         |

| Cause                        | Sex    | Covariate                                              | GBD 2015 |         |         | GBD 2016 |         |         |
|------------------------------|--------|--------------------------------------------------------|----------|---------|---------|----------|---------|---------|
|                              |        |                                                        | Level 1  | Level 2 | Level 3 | Level 1  | Level 2 | Level 3 |
| Other neurological disorders | Female | Animal Fats (kcal per capita)                          |          | X       |         |          | X       |         |
| Other neurological disorders | Female | Smoking Prevalence                                     |          |         | X       |          |         | X       |
| Other neurological disorders | Female | Underweight (proportion <2SD weight for age, <5 years) | X        |         |         | X        |         |         |
| Other neurological disorders | Female | Alcohol (liters per capita)                            |          | X       |         |          | X       |         |
| Other neurological disorders | Female | Mean BMI                                               | X        |         |         | X        |         |         |
| Other neurological disorders | Female | Cholesterol (total, mean per capita)                   | X        |         |         | X        |         |         |
| Other neurological disorders | Female | Population Density (over 1000 ppl/sqkm, proportion)    |          | X       |         |          | X       |         |
| Other neurological disorders | Female | Systolic Blood Pressure (mmHg)                         | X        |         |         | X        |         |         |
| Schizophrenia                | Male   | Alcohol (liters per capita)                            |          | X       |         |          | X       |         |
| Schizophrenia                | Male   | Cumulative Cigarettes (20 Years)                       |          | X       |         |          | X       |         |
| Schizophrenia                | Male   | Education (years per capita)                           |          |         | X       |          |         | X       |
| Schizophrenia                | Male   | Health System Access 2 (unitless)                      | X        |         |         | X        |         |         |
| Schizophrenia                | Male   | LDI (1\$ per capita)                                   |          |         | X       |          |         | X       |
| Schizophrenia                | Male   | Underweight (proportion <2SD weight for age, <5 years) | X        |         |         | X        |         |         |
| Schizophrenia                | Male   | Smoking Prevalence                                     |          | X       |         |          | X       |         |
| Schizophrenia                | Male   | Socio-demographic Index                                |          |         | X       |          |         | X       |
| Schizophrenia                | Female | Alcohol (liters per capita)                            |          | X       |         |          | X       |         |
| Schizophrenia                | Female | Cumulative Cigarettes (20 Years)                       |          | X       |         |          | X       |         |
| Schizophrenia                | Female | Education (years per capita)                           |          |         | X       |          |         | X       |
| Schizophrenia                | Female | Health System Access 2 (unitless)                      | X        |         |         | X        |         |         |
| Schizophrenia                | Female | LDI (1\$ per capita)                                   |          |         | X       |          |         | X       |
| Schizophrenia                | Female | Underweight (proportion <2SD weight for age, <5 years) | X        |         |         | X        |         |         |
| Schizophrenia                | Female | Smoking Prevalence                                     |          | X       |         |          | X       |         |
| Schizophrenia                | Female | Socio-demographic Index                                |          |         | X       |          |         | X       |
| Alcohol use disorders        | Male   | Alcohol (liters per capita)                            | X        |         |         | X        |         |         |
| Alcohol use disorders        | Male   | Cumulative Cigarettes (10 Years)                       |          | X       |         |          | X       |         |
| Alcohol use disorders        | Male   | Education (years per capita)                           |          |         | X       |          |         | X       |
| Alcohol use disorders        | Male   | Health System Access 2 (unitless)                      |          | X       |         |          | X       |         |
| Alcohol use disorders        | Male   | LDI (1\$ per capita)                                   |          |         | X       |          |         | X       |
| Alcohol use disorders        | Male   | Religion (binary, >50% Muslim)                         |          | X       |         |          | X       |         |
| Alcohol use disorders        | Male   | Smoking Prevalence                                     |          | X       |         |          | X       |         |
| Alcohol use disorders        | Male   | Prevalence of binge drinking                           | X        |         |         | X        |         |         |
| Alcohol use disorders        | Male   | Socio-demographic Index                                |          |         | X       |          |         | X       |
| Alcohol use disorders        | Female | Alcohol (liters per capita)                            | X        |         |         | X        |         |         |
| Alcohol use disorders        | Female | Cumulative Cigarettes (10 Years)                       |          | X       |         |          | X       |         |
| Alcohol use disorders        | Female | Education (years per capita)                           |          |         | X       |          |         | X       |
| Alcohol use disorders        | Female | Health System Access 2 (unitless)                      |          | X       |         |          | X       |         |
| Alcohol use disorders        | Female | LDI (1\$ per capita)                                   |          |         | X       |          |         | X       |
| Alcohol use disorders        | Female | Religion (binary, >50% Muslim)                         |          | X       |         |          | X       |         |
| Alcohol use disorders        | Female | Smoking Prevalence                                     |          | X       |         |          | X       |         |
| Alcohol use disorders        | Female | Prevalence of binge drinking                           | X        |         |         | X        |         |         |
| Alcohol use disorders        | Female | Socio-demographic Index                                |          |         | X       |          |         | X       |
| Drug use disorders           | Male   | Alcohol (liters per capita)                            | X        |         |         | X        |         |         |
| Drug use disorders           | Male   | Cumulative Cigarettes (10 Years)                       | X        |         |         | X        |         |         |
| Drug use disorders           | Male   | Cumulative Cigarettes (5 Years)                        | X        |         |         | X        |         |         |
| Drug use disorders           | Male   | Education (years per capita)                           |          |         | X       |          |         | X       |
| Drug use disorders           | Male   | Health System Access 2 (unitless)                      | X        |         |         | X        |         |         |
| Drug use disorders           | Male   | LDI (1\$ per capita)                                   |          |         | X       |          |         | X       |
| Drug use disorders           | Male   | Opium Cultivation (binary)                             | X        |         |         | X        |         |         |
| Drug use disorders           | Male   | Smoking Prevalence                                     | X        |         |         | X        |         |         |
| Drug use disorders           | Male   | Socio-demographic Index                                |          |         | X       |          |         | X       |
| Drug use disorders           | Female | Alcohol (liters per capita)                            | X        |         |         | X        |         |         |
| Drug use disorders           | Female | Cumulative Cigarettes (10 Years)                       | X        |         |         | X        |         |         |
| Drug use disorders           | Female | Cumulative Cigarettes (5 Years)                        | X        |         |         | X        |         |         |
| Drug use disorders           | Female | Education (years per capita)                           |          |         | X       |          |         | X       |
| Drug use disorders           | Female | Health System Access 2 (unitless)                      | X        |         |         | X        |         |         |
| Drug use disorders           | Female | LDI (1\$ per capita)                                   |          |         | X       |          |         | X       |
| Drug use disorders           | Female | Opium Cultivation (binary)                             | X        |         |         | X        |         |         |
| Drug use disorders           | Female | Smoking Prevalence                                     | X        |         |         | X        |         |         |
| Drug use disorders           | Female | Socio-demographic Index                                |          |         | X       |          |         | X       |
| Opium use disorders          | Male   | Alcohol (liters per capita)                            | X        |         |         | X        |         |         |
| Opium use disorders          | Male   | Cumulative Cigarettes (10 Years)                       | X        |         |         | X        |         |         |
| Opium use disorders          | Male   | Cumulative Cigarettes (5 Years)                        | X        |         |         | X        |         |         |
| Opium use disorders          | Male   | Education (years per capita)                           |          |         | X       |          |         | X       |
| Opium use disorders          | Male   | Health System Access 2 (unitless)                      | X        |         |         | X        |         |         |
| Opium use disorders          | Male   | LDI (1\$ per capita)                                   |          |         | X       |          |         | X       |
| Opium use disorders          | Male   | Opium Cultivation (binary)                             | X        |         |         | X        |         |         |
| Opium use disorders          | Male   | Smoking Prevalence                                     | X        |         |         | X        |         |         |
| Opium use disorders          | Male   | Socio-demographic Index                                |          |         | X       |          |         | X       |
| Opium use disorders          | Female | Alcohol (liters per capita)                            | X        |         |         | X        |         |         |
| Opium use disorders          | Female | Cumulative Cigarettes (10 Years)                       | X        |         |         | X        |         |         |
| Opium use disorders          | Female | Cumulative Cigarettes (5 Years)                        | X        |         |         | X        |         |         |
| Opium use disorders          | Female | Education (years per capita)                           |          |         | X       |          |         | X       |
| Opium use disorders          | Female | Health System Access 2 (unitless)                      | X        |         |         | X        |         |         |
| Opium use disorders          | Female | LDI (1\$ per capita)                                   |          |         | X       |          |         | X       |
| Opium use disorders          | Female | Opium Cultivation (binary)                             | X        |         |         | X        |         |         |
| Opium use disorders          | Female | Smoking Prevalence                                     | X        |         |         | X        |         |         |
| Opium use disorders          | Female | Socio-demographic Index                                |          |         | X       |          |         | X       |
| Cocaine use disorders        | Male   | Alcohol (liters per capita)                            | X        |         |         | X        |         |         |
| Cocaine use disorders        | Male   | Cumulative Cigarettes (10 Years)                       | X        |         |         | X        |         |         |
| Cocaine use disorders        | Male   | Cumulative Cigarettes (5 Years)                        | X        |         |         | X        |         |         |
| Cocaine use disorders        | Male   | Education (years per capita)                           |          |         | X       |          |         | X       |
| Cocaine use disorders        | Male   | LDI (1\$ per capita)                                   |          |         | X       |          |         | X       |
| Cocaine use disorders        | Male   | Smoking Prevalence                                     | X        |         |         | X        |         |         |
| Cocaine use disorders        | Male   | Socio-demographic Index                                |          |         | X       |          |         | X       |

| Cause                     | Sex    | Covariate                                         | GBD 2015 |         |         | GBD 2016 |         |         |
|---------------------------|--------|---------------------------------------------------|----------|---------|---------|----------|---------|---------|
|                           |        |                                                   | Level 1  | Level 2 | Level 3 | Level 1  | Level 2 | Level 3 |
| Cocaine use disorders     | Female | Alcohol (liters per capita)                       | X        |         |         | X        |         |         |
| Cocaine use disorders     | Female | Cumulative Cigarettes (10 Years)                  | X        |         |         | X        |         |         |
| Cocaine use disorders     | Female | Cumulative Cigarettes (5 Years)                   | X        |         |         | X        |         |         |
| Cocaine use disorders     | Female | Education (years per capita)                      |          |         | X       |          |         | X       |
| Cocaine use disorders     | Female | LDI (I\$ per capita)                              |          |         | X       |          |         | X       |
| Cocaine use disorders     | Female | Smoking Prevalence                                | X        |         |         | X        |         |         |
| Cocaine use disorders     | Female | Socio-demographic Index                           |          |         | X       |          |         | X       |
| Amphetamine use disorders | Male   | Alcohol (liters per capita)                       | X        |         |         | X        |         |         |
| Amphetamine use disorders | Male   | Cumulative Cigarettes (10 Years)                  | X        |         |         | X        |         |         |
| Amphetamine use disorders | Male   | Cumulative Cigarettes (5 Years)                   | X        |         |         | X        |         |         |
| Amphetamine use disorders | Male   | Education (years per capita)                      |          |         | X       |          |         | X       |
| Amphetamine use disorders | Male   | LDI (I\$ per capita)                              |          |         | X       |          |         | X       |
| Amphetamine use disorders | Male   | Smoking Prevalence                                | X        |         |         | X        |         |         |
| Amphetamine use disorders | Male   | Socio-demographic Index                           |          |         | X       |          |         | X       |
| Amphetamine use disorders | Female | Alcohol (liters per capita)                       | X        |         |         | X        |         |         |
| Amphetamine use disorders | Female | Cumulative Cigarettes (10 Years)                  | X        |         |         | X        |         |         |
| Amphetamine use disorders | Female | Cumulative Cigarettes (5 Years)                   | X        |         |         | X        |         |         |
| Amphetamine use disorders | Female | Education (years per capita)                      |          |         | X       |          |         | X       |
| Amphetamine use disorders | Female | LDI (I\$ per capita)                              |          |         | X       |          |         | X       |
| Amphetamine use disorders | Female | Smoking Prevalence                                | X        |         |         | X        |         |         |
| Amphetamine use disorders | Female | Socio-demographic Index                           |          |         | X       |          |         | X       |
| Other drug use disorders  | Male   | Alcohol (liters per capita)                       | X        |         |         | X        |         |         |
| Other drug use disorders  | Male   | Cumulative Cigarettes (10 Years)                  | X        |         |         | X        |         |         |
| Other drug use disorders  | Male   | Cumulative Cigarettes (5 Years)                   | X        |         |         | X        |         |         |
| Other drug use disorders  | Male   | Education (years per capita)                      |          |         | X       |          |         | X       |
| Other drug use disorders  | Male   | LDI (I\$ per capita)                              |          |         | X       |          |         | X       |
| Other drug use disorders  | Male   | Smoking Prevalence                                | X        |         |         | X        |         |         |
| Other drug use disorders  | Male   | Socio-demographic Index                           |          |         | X       |          |         | X       |
| Other drug use disorders  | Female | Alcohol (liters per capita)                       | X        |         |         | X        |         |         |
| Other drug use disorders  | Female | Cumulative Cigarettes (10 Years)                  | X        |         |         | X        |         |         |
| Other drug use disorders  | Female | Cumulative Cigarettes (5 Years)                   | X        |         |         | X        |         |         |
| Other drug use disorders  | Female | Education (years per capita)                      |          |         | X       |          |         | X       |
| Other drug use disorders  | Female | LDI (I\$ per capita)                              |          |         | X       |          |         | X       |
| Other drug use disorders  | Female | Smoking Prevalence                                | X        |         |         | X        |         |         |
| Eating disorders          | Male   | Socio-demographic Index                           |          |         | X       |          |         | X       |
| Eating disorders          | Female | Socio-demographic Index                           |          |         | X       |          |         | X       |
| Anorexia nervosa          | Male   | Socio-demographic Index                           |          |         | X       |          |         | X       |
| Anorexia nervosa          | Female | Socio-demographic Index                           |          |         | X       |          |         | X       |
| Bulimia nervosa           | Male   | Socio-demographic Index                           |          |         | X       |          |         | X       |
| Bulimia nervosa           | Female | Socio-demographic Index                           |          |         | X       |          |         | X       |
| Diabetes mellitus         | Male   | Education (years per capita)                      | X        |         |         |          | X       |         |
| Diabetes mellitus         | Male   | Education (years per capita)                      |          |         | X       |          | X       |         |
| Diabetes mellitus         | Male   | LDI (I\$ per capita)                              | X        |         |         |          | X       |         |
| Diabetes mellitus         | Male   | LDI (I\$ per capita)                              |          |         | X       |          | X       |         |
| Diabetes mellitus         | Female | Education (years per capita)                      | X        |         |         |          | X       |         |
| Diabetes mellitus         | Female | Education (years per capita)                      |          |         | X       |          | X       |         |
| Diabetes mellitus         | Female | LDI (I\$ per capita)                              | X        |         |         |          | X       |         |
| Diabetes mellitus         | Female | LDI (I\$ per capita)                              |          |         | X       |          | X       |         |
| Diabetes mellitus         | Male   | Animal Fats (kcal per capita)                     |          | X       |         |          | X       |         |
| Diabetes mellitus         | Male   | Diabetes Fasting Plasma Glucose (mmol/L)          | X        |         |         |          | X       |         |
| Diabetes mellitus         | Male   | Diabetes Age-Standardized Prevalence (proportion) | X        |         |         |          | X       |         |
| Diabetes mellitus         | Male   | Mean BMI                                          | X        |         |         |          | X       |         |
| Diabetes mellitus         | Male   | Cholesterol (total, mean per capita)              | X        |         |         |          | X       |         |
| Diabetes mellitus         | Male   | Systolic Blood Pressure (mmHg)                    | X        |         |         |          | X       |         |
| Diabetes mellitus         | Male   | fruits adjusted(g)                                |          | X       |         |          | X       |         |
| Diabetes mellitus         | Male   | vegetables adjusted(g)                            |          | X       |         |          | X       |         |
| Diabetes mellitus         | Male   | whole grains adjusted(g)                          |          | X       |         |          | X       |         |
| Diabetes mellitus         | Male   | energy unadjusted(kcal)                           |          | X       |         |          | X       |         |
| Diabetes mellitus         | Female | Animal Fats (kcal per capita)                     |          | X       |         |          | X       |         |
| Diabetes mellitus         | Female | Diabetes Fasting Plasma Glucose (mmol/L)          | X        |         |         |          | X       |         |
| Diabetes mellitus         | Female | Diabetes Age-Standardized Prevalence (proportion) | X        |         |         |          | X       |         |
| Diabetes mellitus         | Female | Mean BMI                                          | X        |         |         |          | X       |         |
| Diabetes mellitus         | Female | Cholesterol (total, mean per capita)              | X        |         |         |          | X       |         |
| Diabetes mellitus         | Female | Systolic Blood Pressure (mmHg)                    | X        |         |         |          | X       |         |
| Diabetes mellitus         | Female | fruits adjusted(g)                                |          | X       |         |          | X       |         |
| Diabetes mellitus         | Female | vegetables adjusted(g)                            |          | X       |         |          | X       |         |
| Diabetes mellitus         | Female | whole grains adjusted(g)                          |          | X       |         |          | X       |         |
| Diabetes mellitus         | Female | energy unadjusted(kcal)                           |          | X       |         |          | X       |         |
| Acute glomerulonephritis  | Male   | Socio-demographic Index                           |          |         | X       |          |         | X       |
| Acute glomerulonephritis  | Male   | Sanitation (proportion with access)               |          | X       |         |          | X       |         |
| Acute glomerulonephritis  | Male   | Education (years per capita)                      |          |         | X       |          |         | X       |
| Acute glomerulonephritis  | Male   | Diabetes Age-Standardized Prevalence (proportion) |          | X       |         |          | X       |         |
| Acute glomerulonephritis  | Male   | Systolic Blood Pressure (mmHg)                    |          | X       |         |          | X       |         |
| Acute glomerulonephritis  | Male   | Improved Water Source (proportion with access)    |          | X       |         |          | X       |         |
| Acute glomerulonephritis  | Male   | LDI (I\$ per capita)                              |          |         | X       |          |         | X       |
| Acute glomerulonephritis  | Female | Socio-demographic Index                           |          |         | X       |          |         | X       |
| Acute glomerulonephritis  | Female | Sanitation (proportion with access)               |          | X       |         |          | X       |         |
| Acute glomerulonephritis  | Female | Education (years per capita)                      |          |         | X       |          |         | X       |
| Acute glomerulonephritis  | Female | Diabetes Age-Standardized Prevalence (proportion) |          | X       |         |          | X       |         |
| Acute glomerulonephritis  | Female | Systolic Blood Pressure (mmHg)                    |          | X       |         |          | X       |         |
| Acute glomerulonephritis  | Female | Improved Water Source (proportion with access)    |          | X       |         |          | X       |         |
| Acute glomerulonephritis  | Female | LDI (I\$ per capita)                              |          |         | X       |          |         | X       |
| Chronic kidney disease    | Female | Diabetes Fasting Plasma Glucose (mmol/L)          | X        |         |         |          | X       |         |
| Chronic kidney disease    | Female | Diabetes Age-Standardized Prevalence (proportion) | X        |         |         |          | X       |         |

| Cause                                               | Sex    | Covariate                                                       | GBD 2015 |         |         | GBD 2016 |         |         |
|-----------------------------------------------------|--------|-----------------------------------------------------------------|----------|---------|---------|----------|---------|---------|
|                                                     |        |                                                                 | Level 1  | Level 2 | Level 3 | Level 1  | Level 2 | Level 3 |
| Chronic kidney disease                              | Female | Education (years per capita)                                    |          |         | X       |          |         | X       |
| Chronic kidney disease                              | Female | LDI (I\$ per capita)                                            |          |         | X       |          |         | X       |
| Chronic kidney disease                              | Female | Mean BMI                                                        | X        |         |         | X        |         |         |
| Chronic kidney disease                              | Female | Cholesterol (total, mean per capita)                            |          | X       |         |          | X       |         |
| Chronic kidney disease                              | Female | Systolic Blood Pressure (mmHg)                                  | X        |         |         | X        |         |         |
| Chronic kidney disease                              | Female | Socio-demographic Index                                         |          |         | X       |          |         | X       |
| Chronic kidney disease                              | Male   | Diabetes Fasting Plasma Glucose (mmol/L)                        | X        |         |         | X        |         |         |
| Chronic kidney disease                              | Male   | Diabetes Age-Standardized Prevalence (proportion)               | X        |         |         | X        |         |         |
| Chronic kidney disease                              | Male   | Education (years per capita)                                    |          |         | X       |          |         | X       |
| Chronic kidney disease                              | Male   | LDI (I\$ per capita)                                            |          |         | X       |          |         | X       |
| Chronic kidney disease                              | Male   | Mean BMI                                                        | X        |         |         | X        |         |         |
| Chronic kidney disease                              | Male   | Cholesterol (total, mean per capita)                            |          | X       |         |          | X       |         |
| Chronic kidney disease                              | Male   | Systolic Blood Pressure (mmHg)                                  | X        |         |         | X        |         |         |
| Chronic kidney disease                              | Male   | Socio-demographic Index                                         |          |         | X       |          |         | X       |
| Urinary diseases and male infertility               | Male   | Socio-demographic Index                                         |          |         | X       |          |         | X       |
| Urinary diseases and male infertility               | Male   | Education (years per capita)                                    |          |         | X       |          |         | X       |
| Urinary diseases and male infertility               | Male   | LDI (I\$ per capita)                                            |          |         | X       |          |         | X       |
| Urinary diseases and male infertility               | Male   | Latitude 15 to 30 (proportion)                                  |          | X       |         |          | X       |         |
| Urinary diseases and male infertility               | Male   | Latitude Over 45 (proportion)                                   |          | X       |         |          | X       |         |
| Urinary diseases and male infertility               | Male   | Latitude 30 to 45 (proportion)                                  |          | X       |         |          | X       |         |
| Urinary diseases and male infertility               | Male   | Mean BMI                                                        |          | X       |         |          | X       |         |
| Urinary diseases and male infertility               | Male   | Latitude Under 15 (proportion)                                  |          | X       |         |          | X       |         |
| Urinary diseases and male infertility               | Female | Socio-demographic Index                                         |          |         | X       |          |         | X       |
| Urinary diseases and male infertility               | Female | Education (years per capita)                                    |          |         | X       |          |         | X       |
| Urinary diseases and male infertility               | Female | LDI (I\$ per capita)                                            |          |         | X       |          |         | X       |
| Urinary diseases and male infertility               | Female | Latitude 15 to 30 (proportion)                                  |          | X       |         |          | X       |         |
| Urinary diseases and male infertility               | Female | Latitude Over 45 (proportion)                                   |          | X       |         |          | X       |         |
| Urinary diseases and male infertility               | Female | Latitude 30 to 45 (proportion)                                  |          | X       |         |          | X       |         |
| Urinary diseases and male infertility               | Female | Mean BMI                                                        |          | X       |         |          | X       |         |
| Urinary diseases and male infertility               | Female | Latitude Under 15 (proportion)                                  |          | X       |         |          | X       |         |
| Interstitial nephritis and urinary tract infections | Male   | Education (years per capita)                                    |          | X       |         |          | X       |         |
| Interstitial nephritis and urinary tract infections | Male   | LDI (I\$ per capita)                                            |          | X       |         |          | X       |         |
| Interstitial nephritis and urinary tract infections | Male   | Sanitation (proportion with access)                             | X        |         |         | X        |         |         |
| Interstitial nephritis and urinary tract infections | Male   | Socio-demographic Index                                         |          |         | X       |          |         | X       |
| Interstitial nephritis and urinary tract infections | Female | Education (years per capita)                                    |          | X       |         |          | X       |         |
| Interstitial nephritis and urinary tract infections | Female | LDI (I\$ per capita)                                            |          | X       |         |          | X       |         |
| Interstitial nephritis and urinary tract infections | Female | Sanitation (proportion with access)                             | X        |         |         | X        |         |         |
| Interstitial nephritis and urinary tract infections | Female | Socio-demographic Index                                         |          |         | X       |          |         | X       |
| Urolithiasis                                        | Male   | 90th percentile climatic temperature in the given country-year. | X        |         |         | X        |         |         |
| Urolithiasis                                        | Male   | Education (years per capita)                                    |          |         | X       |          |         | X       |
| Urolithiasis                                        | Male   | Socio-demographic Index                                         |          |         | X       |          |         | X       |
| Urolithiasis                                        | Male   | LDI (I\$ per capita)                                            |          |         | X       |          |         | X       |
| Urolithiasis                                        | Female | 90th percentile climatic temperature in the given country-year. | X        |         |         | X        |         |         |
| Urolithiasis                                        | Female | Education (years per capita)                                    |          |         | X       |          |         | X       |
| Urolithiasis                                        | Female | Socio-demographic Index                                         |          |         | X       |          |         | X       |
| Urolithiasis                                        | Female | LDI (I\$ per capita)                                            |          |         | X       |          |         | X       |
| Other urinary diseases                              | Female | Education (years per capita)                                    | X        |         |         | X        |         |         |
| Other urinary diseases                              | Female | Mean BMI                                                        | X        |         |         | X        |         |         |
| Other urinary diseases                              | Female | LDI (I\$ per capita)                                            | X        |         |         | X        |         |         |
| Other urinary diseases                              | Female | Socio-demographic Index                                         |          |         | X       |          |         | X       |
| Other urinary diseases                              | Male   | Education (years per capita)                                    |          | X       |         |          | X       |         |
| Other urinary diseases                              | Male   | Mean BMI                                                        | X        |         |         | X        |         |         |
| Other urinary diseases                              | Male   | LDI (I\$ per capita)                                            |          | X       |         |          | X       |         |
| Other urinary diseases                              | Male   | Socio-demographic Index                                         |          |         | X       |          |         | X       |
| Gynecological diseases                              | Female | Education (years per capita)                                    |          |         | X       |          |         | X       |
| Gynecological diseases                              | Female | LDI (I\$ per capita)                                            |          |         | X       |          |         | X       |
| Gynecological diseases                              | Female | Live Births 35+ (proportion)                                    |          | X       |         |          | X       |         |
| Gynecological diseases                              | Female | Skilled Birth Attendance (proportion)                           |          | X       |         |          | X       |         |
| Gynecological diseases                              | Female | Smoking Prevalence                                              | X        |         |         | X        |         |         |
| Gynecological diseases                              | Female | Total Fertility Rate                                            |          | X       |         |          | X       |         |
| Gynecological diseases                              | Female | Socio-demographic Index                                         |          |         | X       |          |         | X       |
| Uterine fibroids                                    | Female | Education (years per capita)                                    |          |         | X       |          |         | X       |
| Uterine fibroids                                    | Female | LDI (I\$ per capita)                                            |          |         | X       |          |         | X       |
| Uterine fibroids                                    | Female | Live Births 35+ (proportion)                                    |          | X       |         |          | X       |         |
| Uterine fibroids                                    | Female | Skilled Birth Attendance (proportion)                           |          | X       |         |          | X       |         |
| Uterine fibroids                                    | Female | Smoking Prevalence                                              | X        |         |         | X        |         |         |
| Uterine fibroids                                    | Female | Total Fertility Rate                                            |          | X       |         |          | X       |         |
| Uterine fibroids                                    | Female | Socio-demographic Index                                         |          |         | X       |          |         | X       |
| Polycystic ovarian syndrome                         | Female | Education (years per capita)                                    |          |         | X       |          |         | X       |
| Polycystic ovarian syndrome                         | Female | LDI (I\$ per capita)                                            |          |         | X       |          |         | X       |
| Polycystic ovarian syndrome                         | Female | Live Births 35+ (proportion)                                    |          | X       |         |          | X       |         |
| Polycystic ovarian syndrome                         | Female | Skilled Birth Attendance (proportion)                           |          | X       |         |          | X       |         |
| Polycystic ovarian syndrome                         | Female | Smoking Prevalence                                              | X        |         |         | X        |         |         |
| Polycystic ovarian syndrome                         | Female | Total Fertility Rate                                            |          | X       |         |          | X       |         |
| Polycystic ovarian syndrome                         | Female | Socio-demographic Index                                         |          |         | X       |          |         | X       |
| Endometriosis                                       | Female | Education (years per capita)                                    |          |         | X       |          |         | X       |
| Endometriosis                                       | Female | LDI (I\$ per capita)                                            |          |         | X       |          |         | X       |
| Endometriosis                                       | Female | Live Births 35+ (proportion)                                    |          | X       |         |          | X       |         |
| Endometriosis                                       | Female | Skilled Birth Attendance (proportion)                           |          | X       |         |          | X       |         |
| Endometriosis                                       | Female | Smoking Prevalence                                              | X        |         |         | X        |         |         |
| Endometriosis                                       | Female | Total Fertility Rate                                            |          | X       |         |          | X       |         |
| Endometriosis                                       | Female | Socio-demographic Index                                         |          |         | X       |          |         | X       |
| Genital prolapse                                    | Female | Education (years per capita)                                    |          |         | X       |          |         | X       |
| Genital prolapse                                    | Female | LDI (I\$ per capita)                                            |          |         | X       |          |         | X       |
| Genital prolapse                                    | Female | Live Births 35+ (proportion)                                    |          | X       |         |          | X       |         |

| Cause                                             | Sex    | Covariate                                                                    | GBD 2015 |         |         | GBD 2016 |         |         |
|---------------------------------------------------|--------|------------------------------------------------------------------------------|----------|---------|---------|----------|---------|---------|
|                                                   |        |                                                                              | Level 1  | Level 2 | Level 3 | Level 1  | Level 2 | Level 3 |
| Genital prolapse                                  | Female | Skilled Birth Attendance (proportion)                                        |          | X       |         |          | X       |         |
| Genital prolapse                                  | Female | Smoking Prevalence                                                           | X        |         |         | X        |         |         |
| Genital prolapse                                  | Female | Total Fertility Rate                                                         |          | X       |         | X        |         |         |
| Genital prolapse                                  | Female | Socio-demographic Index                                                      |          |         | X       |          |         | X       |
| Other gynecological diseases                      | Female | Education (years per capita)                                                 |          |         | X       |          |         | X       |
| Other gynecological diseases                      | Female | LDI (I\$ per capita)                                                         |          |         | X       |          |         | X       |
| Other gynecological diseases                      | Female | Live Births 35+ (proportion)                                                 |          | X       |         | X        |         |         |
| Other gynecological diseases                      | Female | Skilled Birth Attendance (proportion)                                        |          | X       |         | X        |         |         |
| Other gynecological diseases                      | Female | Smoking Prevalence                                                           | X        |         |         | X        |         |         |
| Other gynecological diseases                      | Female | Total Fertility Rate                                                         |          | X       |         | X        |         |         |
| Other gynecological diseases                      | Female | Socio-demographic Index                                                      |          |         | X       |          |         | X       |
| Hemoglobinopathies and hemolytic anemias          | Male   | Education (years per capita)                                                 |          |         | X       |          |         | X       |
| Hemoglobinopathies and hemolytic anemias          | Male   | LDI (I\$ per capita)                                                         |          |         | X       |          |         | X       |
| Hemoglobinopathies and hemolytic anemias          | Male   | Latitude Under 15 (proportion)                                               |          |         | X       |          |         | X       |
| Hemoglobinopathies and hemolytic anemias          | Male   | Latitude Under 15 (proportion)                                               |          | X       |         |          |         | X       |
| Hemoglobinopathies and hemolytic anemias          | Male   | Latitude 15 to 30 (proportion)                                               |          |         | X       |          |         | X       |
| Hemoglobinopathies and hemolytic anemias          | Male   | Latitude 15 to 30 (proportion)                                               |          | X       |         |          |         | X       |
| Hemoglobinopathies and hemolytic anemias          | Male   | Latitude 30 to 45 (proportion)                                               |          |         | X       |          |         | X       |
| Hemoglobinopathies and hemolytic anemias          | Male   | Latitude 30 to 45 (proportion)                                               |          | X       |         |          |         | X       |
| Hemoglobinopathies and hemolytic anemias          | Male   | Latitude Over 45 (proportion)                                                |          |         | X       |          |         | X       |
| Hemoglobinopathies and hemolytic anemias          | Male   | Latitude Over 45 (proportion)                                                |          | X       |         |          |         | X       |
| Hemoglobinopathies and hemolytic anemias          | Male   | Hemoglobinopathies Prevalence x Excess Mortality                             | X        |         |         | X        |         |         |
| Hemoglobinopathies and hemolytic anemias          | Male   | Health System Access (capped)                                                |          | X       |         | X        |         |         |
| Hemoglobinopathies and hemolytic anemias          | Male   | Hemoglobinopathies Prevalence x Excess Mortality (excluding G6PD deficiency) | X        |         |         | X        |         |         |
| Hemoglobinopathies and hemolytic anemias          | Male   | Socio-demographic Index                                                      |          |         | X       |          |         | X       |
| Hemoglobinopathies and hemolytic anemias          | Female | Education (years per capita)                                                 |          |         | X       |          |         | X       |
| Hemoglobinopathies and hemolytic anemias          | Female | LDI (I\$ per capita)                                                         |          |         | X       |          |         | X       |
| Hemoglobinopathies and hemolytic anemias          | Female | Latitude Under 15 (proportion)                                               |          |         | X       |          |         | X       |
| Hemoglobinopathies and hemolytic anemias          | Female | Latitude Under 15 (proportion)                                               |          | X       |         |          |         | X       |
| Hemoglobinopathies and hemolytic anemias          | Female | Latitude 15 to 30 (proportion)                                               |          |         | X       |          |         | X       |
| Hemoglobinopathies and hemolytic anemias          | Female | Latitude 15 to 30 (proportion)                                               |          | X       |         |          |         | X       |
| Hemoglobinopathies and hemolytic anemias          | Female | Latitude 30 to 45 (proportion)                                               |          |         | X       |          |         | X       |
| Hemoglobinopathies and hemolytic anemias          | Female | Latitude 30 to 45 (proportion)                                               |          | X       |         |          |         | X       |
| Hemoglobinopathies and hemolytic anemias          | Female | Latitude Over 45 (proportion)                                                |          |         | X       |          |         | X       |
| Hemoglobinopathies and hemolytic anemias          | Female | Latitude Over 45 (proportion)                                                |          | X       |         |          |         | X       |
| Hemoglobinopathies and hemolytic anemias          | Female | Hemoglobinopathies Prevalence x Excess Mortality                             | X        |         |         | X        |         |         |
| Hemoglobinopathies and hemolytic anemias          | Female | Health System Access (capped)                                                |          | X       |         | X        |         |         |
| Hemoglobinopathies and hemolytic anemias          | Female | Hemoglobinopathies Prevalence x Excess Mortality (excluding G6PD deficiency) | X        |         |         | X        |         |         |
| Hemoglobinopathies and hemolytic anemias          | Female | Socio-demographic Index                                                      |          |         | X       |          |         | X       |
| Endocrine, metabolic, blood, and immune disorders | Male   | Total Calories (kcal per capita)                                             |          | X       |         | X        |         |         |
| Endocrine, metabolic, blood, and immune disorders | Male   | Socio-demographic Index                                                      |          |         | X       |          |         | X       |
| Endocrine, metabolic, blood, and immune disorders | Male   | Education (years per capita)                                                 |          |         | X       |          |         | X       |
| Endocrine, metabolic, blood, and immune disorders | Male   | LDI (I\$ per capita)                                                         |          |         | X       |          |         | X       |
| Endocrine, metabolic, blood, and immune disorders | Male   | Animal Fats (kcal per capita)                                                |          | X       |         | X        |         |         |
| Endocrine, metabolic, blood, and immune disorders | Male   | Alcohol (liters per capita)                                                  |          | X       |         | X        |         |         |
| Endocrine, metabolic, blood, and immune disorders | Male   | Mean BMI                                                                     | X        |         |         | X        |         |         |
| Endocrine, metabolic, blood, and immune disorders | Male   | Cholesterol (total, mean per capita)                                         |          | X       |         | X        |         |         |
| Endocrine, metabolic, blood, and immune disorders | Female | Total Calories (kcal per capita)                                             |          | X       |         | X        |         |         |
| Endocrine, metabolic, blood, and immune disorders | Female | Socio-demographic Index                                                      |          |         | X       |          |         | X       |
| Endocrine, metabolic, blood, and immune disorders | Female | Education (years per capita)                                                 |          |         | X       |          |         | X       |
| Endocrine, metabolic, blood, and immune disorders | Female | LDI (I\$ per capita)                                                         |          |         | X       |          |         | X       |
| Endocrine, metabolic, blood, and immune disorders | Female | Animal Fats (kcal per capita)                                                |          | X       |         | X        |         |         |
| Endocrine, metabolic, blood, and immune disorders | Female | Alcohol (liters per capita)                                                  |          | X       |         | X        |         |         |
| Endocrine, metabolic, blood, and immune disorders | Female | Mean BMI                                                                     | X        |         |         | X        |         |         |
| Endocrine, metabolic, blood, and immune disorders | Female | Cholesterol (total, mean per capita)                                         |          | X       |         | X        |         |         |
| Musculoskeletal disorders                         | Male   | Alcohol (liters per capita)                                                  |          | X       |         | X        |         |         |
| Musculoskeletal disorders                         | Male   | Cumulative Cigarettes (10 Years)                                             |          | X       |         | X        |         |         |
| Musculoskeletal disorders                         | Male   | Cumulative Cigarettes (5 Years)                                              |          | X       |         | X        |         |         |
| Musculoskeletal disorders                         | Male   | Education (years per capita)                                                 |          | X       |         | X        |         |         |
| Musculoskeletal disorders                         | Male   | LDI (I\$ per capita)                                                         |          | X       |         | X        |         |         |
| Musculoskeletal disorders                         | Male   | Mean BMI                                                                     | X        |         |         | X        |         |         |
| Musculoskeletal disorders                         | Male   | Cholesterol (total, mean per capita)                                         |          | X       |         | X        |         |         |
| Musculoskeletal disorders                         | Male   | Smoking Prevalence                                                           |          | X       |         | X        |         |         |
| Musculoskeletal disorders                         | Male   | Socio-demographic Index                                                      |          |         | X       |          |         | X       |
| Musculoskeletal disorders                         | Female | Alcohol (liters per capita)                                                  |          | X       |         | X        |         |         |
| Musculoskeletal disorders                         | Female | Cumulative Cigarettes (10 Years)                                             |          | X       |         | X        |         |         |
| Musculoskeletal disorders                         | Female | Cumulative Cigarettes (5 Years)                                              |          | X       |         | X        |         |         |
| Musculoskeletal disorders                         | Female | Education (years per capita)                                                 |          | X       |         | X        |         |         |
| Musculoskeletal disorders                         | Female | LDI (I\$ per capita)                                                         |          | X       |         | X        |         |         |
| Musculoskeletal disorders                         | Female | Mean BMI                                                                     | X        |         |         | X        |         |         |
| Musculoskeletal disorders                         | Female | Cholesterol (total, mean per capita)                                         |          | X       |         | X        |         |         |
| Musculoskeletal disorders                         | Female | Smoking Prevalence                                                           |          | X       |         | X        |         |         |
| Musculoskeletal disorders                         | Female | Socio-demographic Index                                                      |          |         | X       |          |         | X       |
| Rheumatoid arthritis                              | Male   | Alcohol (liters per capita)                                                  | X        |         |         | X        |         |         |
| Rheumatoid arthritis                              | Male   | Cumulative Cigarettes (10 Years)                                             | X        |         |         | X        |         |         |
| Rheumatoid arthritis                              | Male   | Cumulative Cigarettes (5 Years)                                              | X        |         |         | X        |         |         |
| Rheumatoid arthritis                              | Male   | Education (years per capita)                                                 |          |         | X       |          |         | X       |
| Rheumatoid arthritis                              | Male   | LDI (I\$ per capita)                                                         |          |         | X       |          |         | X       |
| Rheumatoid arthritis                              | Male   | Mean BMI                                                                     |          |         | X       |          |         | X       |
| Rheumatoid arthritis                              | Male   | Cholesterol (total, mean per capita)                                         |          | X       |         | X        |         |         |
| Rheumatoid arthritis                              | Male   | Smoking Prevalence                                                           | X        |         |         | X        |         |         |
| Rheumatoid arthritis                              | Male   | Socio-demographic Index                                                      |          |         | X       |          |         | X       |
| Rheumatoid arthritis                              | Female | Alcohol (liters per capita)                                                  | X        |         |         | X        |         |         |
| Rheumatoid arthritis                              | Female | Cumulative Cigarettes (10 Years)                                             | X        |         |         | X        |         |         |
| Rheumatoid arthritis                              | Female | Cumulative Cigarettes (5 Years)                                              | X        |         |         | X        |         |         |

| Cause                           | Sex    | Covariate                                          | GBD 2015 |         |         | GBD 2016 |         |         |
|---------------------------------|--------|----------------------------------------------------|----------|---------|---------|----------|---------|---------|
|                                 |        |                                                    | Level 1  | Level 2 | Level 3 | Level 1  | Level 2 | Level 3 |
| Rheumatoid arthritis            | Female | Education (years per capita)                       |          |         | X       |          |         | X       |
| Rheumatoid arthritis            | Female | LDI (I\$ per capita)                               |          |         | X       |          |         | X       |
| Rheumatoid arthritis            | Female | Mean BMI                                           |          |         | X       |          |         | X       |
| Rheumatoid arthritis            | Female | Cholesterol (total, mean per capita)               |          | X       |         |          | X       |         |
| Rheumatoid arthritis            | Female | Smoking Prevalence                                 | X        |         |         | X        |         |         |
| Rheumatoid arthritis            | Female | Socio-demographic Index                            |          |         | X       |          |         | X       |
| Other musculoskeletal disorders | Male   | Cumulative Cigarettes (10 Years)                   |          | X       |         |          | X       |         |
| Other musculoskeletal disorders | Male   | Cumulative Cigarettes (5 Years)                    |          | X       |         |          | X       |         |
| Other musculoskeletal disorders | Male   | Education (years per capita)                       |          | X       |         |          | X       |         |
| Other musculoskeletal disorders | Male   | LDI (I\$ per capita)                               |          | X       |         |          | X       |         |
| Other musculoskeletal disorders | Male   | Socio-demographic Index                            |          |         | X       |          |         | X       |
| Other musculoskeletal disorders | Male   | Smoking Prevalence                                 |          | X       |         |          | X       |         |
| Other musculoskeletal disorders | Male   | Alcohol (liters per capita)                        |          | X       |         |          | X       |         |
| Other musculoskeletal disorders | Male   | Mean BMI                                           | X        |         |         | X        |         |         |
| Other musculoskeletal disorders | Male   | Cholesterol (total, mean per capita)               |          | X       |         |          | X       |         |
| Other musculoskeletal disorders | Female | Cumulative Cigarettes (10 Years)                   |          | X       |         |          | X       |         |
| Other musculoskeletal disorders | Female | Cumulative Cigarettes (5 Years)                    |          | X       |         |          | X       |         |
| Other musculoskeletal disorders | Female | Education (years per capita)                       |          | X       |         |          | X       |         |
| Other musculoskeletal disorders | Female | LDI (I\$ per capita)                               |          | X       |         |          | X       |         |
| Other musculoskeletal disorders | Female | Socio-demographic Index                            |          |         | X       |          |         | X       |
| Other musculoskeletal disorders | Female | Smoking Prevalence                                 |          | X       |         |          | X       |         |
| Other musculoskeletal disorders | Female | Alcohol (liters per capita)                        |          | X       |         |          | X       |         |
| Other musculoskeletal disorders | Female | Mean BMI                                           | X        |         |         | X        |         |         |
| Other musculoskeletal disorders | Female | Cholesterol (total, mean per capita)               |          | X       |         |          | X       |         |
| Congenital birth defects        | Male   | Legality of Abortion                               |          | X       |         |          | X       |         |
| Congenital birth defects        | Male   | Alcohol (liters per capita)                        | X        |         |         |          |         | X       |
| Congenital birth defects        | Male   | Education (years per capita)                       |          | X       |         |          | X       |         |
| Congenital birth defects        | Male   | Live Births 35+ (proportion)                       | X        |         |         | X        |         |         |
| Congenital birth defects        | Male   | Indoor Air Pollution (All Cooking Fuels)           |          |         | X       |          |         | X       |
| Congenital birth defects        | Male   | Smoking Prevalence (Reproductive Age Standardized) |          |         | X       |          | X       |         |
| Congenital birth defects        | Male   | Socio-demographic Index                            |          |         | X       |          |         | X       |
| Congenital birth defects        | Female | Legality of Abortion                               |          | X       |         |          | X       |         |
| Congenital birth defects        | Female | Alcohol (liters per capita)                        | X        |         |         |          |         | X       |
| Congenital birth defects        | Female | Education (years per capita)                       |          | X       |         |          | X       |         |
| Congenital birth defects        | Female | Live Births 35+ (proportion)                       | X        |         |         | X        |         |         |
| Congenital birth defects        | Female | Indoor Air Pollution (All Cooking Fuels)           |          |         | X       |          |         | X       |
| Congenital birth defects        | Female | Smoking Prevalence (Reproductive Age Standardized) |          |         | X       |          | X       |         |
| Congenital birth defects        | Female | Socio-demographic Index                            |          |         | X       |          |         | X       |
| Neural tube defects             | Male   | Diabetes Age-Standardized Prevalence (proportion)  | X        |         |         |          |         | X       |
| Neural tube defects             | Male   | Education (years per capita)                       |          |         | X       |          |         | X       |
| Neural tube defects             | Male   | Indoor Air Pollution (All Cooking Fuels)           | X        |         |         |          |         | X       |
| Neural tube defects             | Male   | Smoking Prevalence (Reproductive Age Standardized) | X        |         |         |          | X       |         |
| Neural tube defects             | Male   | Socio-demographic Index                            |          |         | X       | X        |         |         |
| Neural tube defects             | Female | Diabetes Age-Standardized Prevalence (proportion)  | X        |         |         |          |         | X       |
| Neural tube defects             | Female | Education (years per capita)                       |          |         | X       |          |         | X       |
| Neural tube defects             | Female | Indoor Air Pollution (All Cooking Fuels)           | X        |         |         |          |         | X       |
| Neural tube defects             | Female | Smoking Prevalence (Reproductive Age Standardized) | X        |         |         |          | X       |         |
| Neural tube defects             | Female | Socio-demographic Index                            |          |         | X       | X        |         |         |
| Congenital heart anomalies      | Male   | Legality of Abortion                               |          | X       |         |          | X       |         |
| Congenital heart anomalies      | Male   | Alcohol (liters per capita)                        | X        |         |         |          |         | X       |
| Congenital heart anomalies      | Male   | Diabetes Age-Standardized Prevalence (proportion)  |          | X       |         |          | X       |         |
| Congenital heart anomalies      | Male   | Education (years per capita)                       |          | X       |         |          | X       |         |
| Congenital heart anomalies      | Male   | Live Births 35+ (proportion)                       | X        |         |         |          |         | X       |
| Congenital heart anomalies      | Male   | Smoking Prevalence (Reproductive Age Standardized) |          |         | X       |          | X       |         |
| Congenital heart anomalies      | Male   | Socio-demographic Index                            |          |         | X       |          | X       |         |
| Congenital heart anomalies      | Female | Legality of Abortion                               |          | X       |         |          | X       |         |
| Congenital heart anomalies      | Female | Alcohol (liters per capita)                        | X        |         |         |          |         | X       |
| Congenital heart anomalies      | Female | Diabetes Age-Standardized Prevalence (proportion)  |          | X       |         |          | X       |         |
| Congenital heart anomalies      | Female | Education (years per capita)                       |          | X       |         |          | X       |         |
| Congenital heart anomalies      | Female | Live Births 35+ (proportion)                       | X        |         |         |          |         | X       |
| Congenital heart anomalies      | Female | Smoking Prevalence (Reproductive Age Standardized) |          |         | X       |          | X       |         |
| Congenital heart anomalies      | Female | Socio-demographic Index                            |          |         | X       |          | X       |         |
| Orofacial clefts                | Male   | Legality of Abortion                               | X        |         |         |          | X       |         |
| Orofacial clefts                | Male   | Alcohol (liters per capita)                        | X        |         |         |          |         | X       |
| Orofacial clefts                | Male   | Diabetes Age-Standardized Prevalence (proportion)  |          | X       |         |          | X       |         |
| Orofacial clefts                | Male   | Education (years per capita)                       |          | X       |         |          |         | X       |
| Orofacial clefts                | Male   | Indoor Air Pollution (All Cooking Fuels)           | X        |         |         |          |         | X       |
| Orofacial clefts                | Male   | Smoking Prevalence (Reproductive Age Standardized) | X        |         |         |          | X       |         |
| Orofacial clefts                | Male   | Socio-demographic Index                            |          |         | X       | X        |         |         |
| Orofacial clefts                | Female | Legality of Abortion                               | X        |         |         |          | X       |         |
| Orofacial clefts                | Female | Alcohol (liters per capita)                        | X        |         |         |          |         | X       |
| Orofacial clefts                | Female | Diabetes Age-Standardized Prevalence (proportion)  |          | X       |         |          | X       |         |
| Orofacial clefts                | Female | Education (years per capita)                       |          | X       |         |          |         | X       |
| Orofacial clefts                | Female | Indoor Air Pollution (All Cooking Fuels)           | X        |         |         |          | X       |         |
| Orofacial clefts                | Female | Indoor Air Pollution (All Cooking Fuels)           | X        |         |         |          |         | X       |
| Orofacial clefts                | Female | Smoking Prevalence (Reproductive Age Standardized) | X        |         |         |          | X       |         |
| Orofacial clefts                | Female | Socio-demographic Index                            |          |         | X       | X        |         |         |
| Down syndrome                   | Male   | Legality of Abortion                               | X        |         |         |          | X       |         |
| Down syndrome                   | Male   | Education (years per capita)                       |          |         | X       |          |         | X       |
| Down syndrome                   | Male   | LDI (I\$ per capita)                               |          |         | X       |          |         | X       |
| Down syndrome                   | Male   | Live Births 35+ (proportion)                       | X        |         |         |          | X       |         |
| Down syndrome                   | Male   | Live Births 40+ (proportion)                       | X        |         |         |          | X       |         |
| Down syndrome                   | Male   | Indoor Air Pollution (All Cooking Fuels)           |          |         | X       |          |         | X       |
| Down syndrome                   | Male   | Smoking Prevalence (Reproductive Age Standardized) |          |         | X       |          |         | X       |
| Down syndrome                   | Male   | Socio-demographic Index                            |          |         | X       |          | X       |         |



| Cause                           | Sex    | Covariate                                          | GBD 2015 |         |         | GBD 2016 |         |         |
|---------------------------------|--------|----------------------------------------------------|----------|---------|---------|----------|---------|---------|
|                                 |        |                                                    | Level 1  | Level 2 | Level 3 | Level 1  | Level 2 | Level 3 |
| Down syndrome                   | Female | Legality of Abortion                               | X        |         |         | X        |         |         |
| Down syndrome                   | Female | Education (years per capita)                       |          |         | X       |          |         | X       |
| Down syndrome                   | Female | LDI (US\$ per capita)                              |          | X       |         |          | X       |         |
| Down syndrome                   | Female | Live Births 35+ (proportion)                       | X        |         |         | X        |         |         |
| Down syndrome                   | Female | Live Births 40+ (proportion)                       | X        |         |         | X        |         |         |
| Down syndrome                   | Female | Indoor Air Pollution (All Cooking Fuels)           |          |         | X       |          |         | X       |
| Down syndrome                   | Female | Smoking Prevalence (Reproductive Age Standardized) |          |         | X       |          |         | X       |
| Down syndrome                   | Female | Socio-demographic Index                            |          |         | X       |          | X       |         |
| Other chromosomal abnormalities | Male   | Legality of Abortion                               | X        |         |         | X        |         |         |
| Other chromosomal abnormalities | Male   | Alcohol (liters per capita)                        |          |         | X       |          |         | X       |
| Other chromosomal abnormalities | Male   | Education (years per capita)                       |          |         | X       |          |         | X       |
| Other chromosomal abnormalities | Male   | LDI (US\$ per capita)                              |          | X       |         |          | X       |         |
| Other chromosomal abnormalities | Male   | Live Births 35+ (proportion)                       | X        |         |         | X        |         |         |
| Other chromosomal abnormalities | Male   | Live Births 40+ (proportion)                       | X        |         |         | X        |         |         |
| Other chromosomal abnormalities | Male   | Indoor Air Pollution (All Cooking Fuels)           |          |         | X       |          |         | X       |
| Other chromosomal abnormalities | Male   | Smoking Prevalence (Reproductive Age Standardized) |          |         | X       |          |         | X       |
| Other chromosomal abnormalities | Male   | Socio-demographic Index                            |          |         | X       |          |         | X       |
| Other chromosomal abnormalities | Female | Legality of Abortion                               | X        |         |         | X        |         |         |
| Other chromosomal abnormalities | Female | Alcohol (liters per capita)                        |          |         | X       |          |         | X       |
| Other chromosomal abnormalities | Female | Education (years per capita)                       |          |         | X       |          |         | X       |
| Other chromosomal abnormalities | Female | LDI (US\$ per capita)                              |          | X       |         |          | X       |         |
| Other chromosomal abnormalities | Female | Live Births 35+ (proportion)                       | X        |         |         | X        |         |         |
| Other chromosomal abnormalities | Female | Live Births 40+ (proportion)                       | X        |         |         | X        |         |         |
| Other chromosomal abnormalities | Female | Indoor Air Pollution (All Cooking Fuels)           |          |         | X       |          |         | X       |
| Other chromosomal abnormalities | Female | Smoking Prevalence (Reproductive Age Standardized) |          |         | X       |          |         | X       |
| Other chromosomal abnormalities | Female | Socio-demographic Index                            |          |         | X       |          |         | X       |
| Other congenital birth defects  | Female | Smoking Prevalence (Reproductive Age Standardized) |          | X       |         |          | X       |         |
| Other congenital birth defects  | Female | Socio-demographic Index                            |          |         | X       |          |         | X       |
| Other congenital birth defects  | Female | Education (years per capita)                       |          | X       |         |          | X       |         |
| Other congenital birth defects  | Female | LDI (US\$ per capita)                              |          |         | X       |          |         | X       |
| Other congenital birth defects  | Female | Diabetes Age-Standardized Prevalence (proportion)  | X        |         |         |          |         | X       |
| Other congenital birth defects  | Female | Legality of Abortion                               |          | X       |         |          | X       |         |
| Other congenital birth defects  | Female | Alcohol (liters per capita)                        | X        |         |         |          |         | X       |
| Other congenital birth defects  | Female | Live Births 35+ (proportion)                       | X        |         |         | X        |         |         |
| Other congenital birth defects  | Female | Indoor Air Pollution (All Cooking Fuels)           |          | X       |         |          | X       |         |
| Other congenital birth defects  | Male   | Legality of Abortion                               |          | X       |         |          | X       |         |
| Other congenital birth defects  | Male   | Alcohol (liters per capita)                        | X        |         |         |          |         | X       |
| Other congenital birth defects  | Male   | Diabetes Age-Standardized Prevalence (proportion)  | X        |         |         |          |         | X       |
| Other congenital birth defects  | Male   | Education (years per capita)                       |          | X       |         |          | X       |         |
| Other congenital birth defects  | Male   | LDI (US\$ per capita)                              |          |         | X       |          |         | X       |
| Other congenital birth defects  | Male   | Live Births 35+ (proportion)                       | X        |         |         | X        |         |         |
| Other congenital birth defects  | Male   | Indoor Air Pollution (All Cooking Fuels)           |          | X       |         |          | X       |         |
| Other congenital birth defects  | Male   | Smoking Prevalence (Reproductive Age Standardized) |          | X       |         |          | X       |         |
| Other congenital birth defects  | Male   | Socio-demographic Index                            |          |         | X       |          |         | X       |
| Skin and subcutaneous diseases  | Male   | Alcohol (liters per capita)                        |          | X       |         |          | X       |         |
| Skin and subcutaneous diseases  | Male   | Cumulative Cigarettes (10 Years)                   |          | X       |         |          | X       |         |
| Skin and subcutaneous diseases  | Male   | Cumulative Cigarettes (5 Years)                    |          | X       |         |          | X       |         |
| Skin and subcutaneous diseases  | Male   | Education (years per capita)                       |          |         | X       |          |         | X       |
| Skin and subcutaneous diseases  | Male   | LDI (US\$ per capita)                              |          |         | X       |          |         | X       |
| Skin and subcutaneous diseases  | Male   | Smoking Prevalence                                 |          | X       |         |          | X       |         |
| Skin and subcutaneous diseases  | Male   | Improved Water Source (proportion with access)     | X        |         |         | X        |         |         |
| Skin and subcutaneous diseases  | Male   | SEV unsafe sanitation                              | X        |         |         | X        |         |         |
| Skin and subcutaneous diseases  | Male   | Socio-demographic Index                            |          |         | X       |          |         | X       |
| Skin and subcutaneous diseases  | Female | Alcohol (liters per capita)                        |          | X       |         |          | X       |         |
| Skin and subcutaneous diseases  | Female | Cumulative Cigarettes (10 Years)                   |          | X       |         |          | X       |         |
| Skin and subcutaneous diseases  | Female | Cumulative Cigarettes (5 Years)                    |          | X       |         |          | X       |         |
| Skin and subcutaneous diseases  | Female | Education (years per capita)                       |          |         | X       |          |         | X       |
| Skin and subcutaneous diseases  | Female | LDI (US\$ per capita)                              |          |         | X       |          |         | X       |
| Skin and subcutaneous diseases  | Female | Smoking Prevalence                                 |          | X       |         |          | X       |         |
| Skin and subcutaneous diseases  | Female | Improved Water Source (proportion with access)     | X        |         |         | X        |         |         |
| Skin and subcutaneous diseases  | Female | SEV unsafe sanitation                              | X        |         |         | X        |         |         |
| Skin and subcutaneous diseases  | Female | Socio-demographic Index                            |          |         | X       |          |         | X       |
| Cellulitis                      | Male   | Education (years per capita)                       |          |         | X       |          |         | X       |
| Cellulitis                      | Male   | LDI (US\$ per capita)                              |          |         | X       |          |         | X       |
| Cellulitis                      | Female | Education (years per capita)                       |          |         | X       |          |         | X       |
| Cellulitis                      | Female | LDI (US\$ per capita)                              |          |         | X       |          |         | X       |
| Pyoderma                        | Male   | Alcohol (liters per capita)                        |          | X       |         |          | X       |         |
| Pyoderma                        | Male   | Cumulative Cigarettes (10 Years)                   |          | X       |         |          | X       |         |
| Pyoderma                        | Male   | Cumulative Cigarettes (5 Years)                    |          | X       |         |          | X       |         |
| Pyoderma                        | Male   | Education (years per capita)                       |          |         | X       |          |         | X       |
| Pyoderma                        | Male   | LDI (US\$ per capita)                              |          |         | X       |          |         | X       |
| Pyoderma                        | Male   | Smoking Prevalence                                 |          | X       |         |          | X       |         |
| Pyoderma                        | Male   | Improved Water Source (proportion with access)     | X        |         |         | X        |         |         |
| Pyoderma                        | Male   | SEV unsafe sanitation                              | X        |         |         | X        |         |         |
| Pyoderma                        | Male   | Socio-demographic Index                            |          |         | X       |          |         | X       |
| Pyoderma                        | Female | Alcohol (liters per capita)                        |          | X       |         |          | X       |         |
| Pyoderma                        | Female | Cumulative Cigarettes (10 Years)                   |          | X       |         |          | X       |         |
| Pyoderma                        | Female | Cumulative Cigarettes (5 Years)                    |          | X       |         |          | X       |         |
| Pyoderma                        | Female | Education (years per capita)                       |          |         | X       |          |         | X       |
| Pyoderma                        | Female | LDI (US\$ per capita)                              |          |         | X       |          |         | X       |
| Pyoderma                        | Female | Smoking Prevalence                                 |          | X       |         |          | X       |         |
| Pyoderma                        | Female | Improved Water Source (proportion with access)     | X        |         |         | X        |         |         |
| Pyoderma                        | Female | SEV unsafe sanitation                              | X        |         |         | X        |         |         |
| Pyoderma                        | Female | Socio-demographic Index                            |          |         | X       |          |         | X       |
| Decubitus ulcer                 | Male   | Cumulative Cigarettes (10 Years)                   |          | X       |         |          | X       |         |

| Cause                                | Sex    | Covariate                                              | GBD 2015 |         |         | GBD 2016 |         |         |
|--------------------------------------|--------|--------------------------------------------------------|----------|---------|---------|----------|---------|---------|
|                                      |        |                                                        | Level 1  | Level 2 | Level 3 | Level 1  | Level 2 | Level 3 |
| Decubitus ulcer                      | Male   | Socio-demographic Index                                |          |         | X       |          |         | X       |
| Decubitus ulcer                      | Male   | Cumulative Cigarettes (5 Years)                        |          | X       |         |          | X       |         |
| Decubitus ulcer                      | Male   | Education (years per capita)                           |          |         | X       |          |         | X       |
| Decubitus ulcer                      | Male   | LDI (I\$ per capita)                                   |          |         | X       |          |         | X       |
| Decubitus ulcer                      | Male   | Health System Access 2 (unifless)                      |          | X       |         |          |         | X       |
| Decubitus ulcer                      | Male   | SEV unsafe sanitation                                  | X        |         |         |          |         | X       |
| Decubitus ulcer                      | Male   | Smoking Prevalence                                     |          | X       |         |          | X       |         |
| Decubitus ulcer                      | Male   | Alcohol (liters per capita)                            |          | X       |         |          | X       |         |
| Decubitus ulcer                      | Male   | Improved Water Source (proportion with access)         | X        |         |         | X        |         |         |
| Decubitus ulcer                      | Female | Cumulative Cigarettes (10 Years)                       |          | X       |         |          | X       |         |
| Decubitus ulcer                      | Female | Socio-demographic Index                                |          |         | X       |          |         | X       |
| Decubitus ulcer                      | Female | Cumulative Cigarettes (5 Years)                        |          | X       |         |          | X       |         |
| Decubitus ulcer                      | Female | Education (years per capita)                           |          |         | X       |          |         | X       |
| Decubitus ulcer                      | Female | LDI (I\$ per capita)                                   |          |         | X       |          |         | X       |
| Decubitus ulcer                      | Female | Health System Access 2 (unifless)                      |          | X       |         |          |         | X       |
| Decubitus ulcer                      | Female | SEV unsafe sanitation                                  | X        |         |         |          |         | X       |
| Decubitus ulcer                      | Female | Smoking Prevalence                                     |          | X       |         |          | X       |         |
| Decubitus ulcer                      | Female | Alcohol (liters per capita)                            |          | X       |         |          | X       |         |
| Decubitus ulcer                      | Female | Improved Water Source (proportion with access)         | X        |         |         | X        |         |         |
| Other skin and subcutaneous diseases | Male   | Alcohol (liters per capita)                            |          | X       |         |          | X       |         |
| Other skin and subcutaneous diseases | Male   | Cumulative Cigarettes (10 Years)                       |          | X       |         |          | X       |         |
| Other skin and subcutaneous diseases | Male   | Cumulative Cigarettes (5 Years)                        |          | X       |         |          | X       |         |
| Other skin and subcutaneous diseases | Male   | Education (years per capita)                           |          |         | X       |          |         | X       |
| Other skin and subcutaneous diseases | Male   | Health System Access 2 (unifless)                      |          | X       |         |          |         | X       |
| Other skin and subcutaneous diseases | Male   | LDI (I\$ per capita)                                   |          |         | X       |          |         | X       |
| Other skin and subcutaneous diseases | Male   | Underweight (proportion <2SD weight for age, <5 years) | X        |         |         | X        |         |         |
| Other skin and subcutaneous diseases | Male   | Smoking Prevalence                                     |          | X       |         |          | X       |         |
| Other skin and subcutaneous diseases | Male   | Improved Water Source (proportion with access)         | X        |         |         | X        |         |         |
| Other skin and subcutaneous diseases | Male   | SEV unsafe sanitation                                  | X        |         |         | X        |         |         |
| Other skin and subcutaneous diseases | Male   | Socio-demographic Index                                |          |         | X       |          |         | X       |
| Other skin and subcutaneous diseases | Female | Alcohol (liters per capita)                            |          | X       |         |          | X       |         |
| Other skin and subcutaneous diseases | Female | Cumulative Cigarettes (10 Years)                       |          | X       |         |          | X       |         |
| Other skin and subcutaneous diseases | Female | Cumulative Cigarettes (5 Years)                        |          | X       |         |          | X       |         |
| Other skin and subcutaneous diseases | Female | Education (years per capita)                           |          |         | X       |          |         | X       |
| Other skin and subcutaneous diseases | Female | Health System Access 2 (unifless)                      |          | X       |         |          |         | X       |
| Other skin and subcutaneous diseases | Female | LDI (I\$ per capita)                                   |          |         | X       |          |         | X       |
| Other skin and subcutaneous diseases | Female | Underweight (proportion <2SD weight for age, <5 years) | X        |         |         | X        |         |         |
| Other skin and subcutaneous diseases | Female | Smoking Prevalence                                     |          | X       |         |          | X       |         |
| Other skin and subcutaneous diseases | Female | Improved Water Source (proportion with access)         | X        |         |         | X        |         |         |
| Other skin and subcutaneous diseases | Female | SEV unsafe sanitation                                  | X        |         |         | X        |         |         |
| Other skin and subcutaneous diseases | Female | Socio-demographic Index                                |          |         | X       |          |         | X       |
| Sudden infant death syndrome         | Male   | Education (years per capita)                           |          |         | X       |          |         | X       |
| Sudden infant death syndrome         | Male   | In-Facility Delivery (proportion)                      | X        |         |         | X        |         |         |
| Sudden infant death syndrome         | Male   | LDI (I\$ per capita)                                   |          |         | X       |          |         | X       |
| Sudden infant death syndrome         | Male   | Underweight (proportion <2SD weight for age, <5 years) |          | X       |         |          | X       |         |
| Sudden infant death syndrome         | Male   | Indoor Air Pollution (All Cooking Fuels)               | X        |         |         | X        |         |         |
| Sudden infant death syndrome         | Male   | Skilled Birth Attendance (proportion)                  |          | X       |         |          | X       |         |
| Sudden infant death syndrome         | Male   | Smoking Prevalence (Reproductive Age Standardized)     | X        |         |         | X        |         |         |
| Sudden infant death syndrome         | Male   | Total Fertility Rate                                   |          |         | X       |          |         | X       |
| Sudden infant death syndrome         | Male   | Socio-demographic Index                                |          |         | X       |          |         | X       |
| Sudden infant death syndrome         | Female | Education (years per capita)                           |          |         | X       |          |         | X       |
| Sudden infant death syndrome         | Female | In-Facility Delivery (proportion)                      | X        |         |         | X        |         |         |
| Sudden infant death syndrome         | Female | LDI (I\$ per capita)                                   |          |         | X       |          |         | X       |
| Sudden infant death syndrome         | Female | Underweight (proportion <2SD weight for age, <5 years) |          | X       |         |          | X       |         |
| Sudden infant death syndrome         | Female | Indoor Air Pollution (All Cooking Fuels)               | X        |         |         | X        |         |         |
| Sudden infant death syndrome         | Female | Skilled Birth Attendance (proportion)                  |          | X       |         |          | X       |         |
| Sudden infant death syndrome         | Female | Smoking Prevalence (Reproductive Age Standardized)     | X        |         |         | X        |         |         |
| Sudden infant death syndrome         | Female | Total Fertility Rate                                   |          |         | X       |          |         | X       |
| Sudden infant death syndrome         | Female | Socio-demographic Index                                |          |         | X       |          |         | X       |
| Transport injuries                   | Male   | Alcohol (liters per capita)                            | X        |         |         | X        |         |         |
| Transport injuries                   | Male   | Education (years per capita)                           |          |         | X       |          |         | X       |
| Transport injuries                   | Male   | LDI (I\$ per capita)                                   |          | X       |         |          | X       |         |
| Transport injuries                   | Male   | Population Density (300-500 ppl/sqkm, proportion)      |          | X       |         |          | X       |         |
| Transport injuries                   | Male   | Population Density (500-1000 ppl/sqkm, proportion)     |          | X       |         |          | X       |         |
| Transport injuries                   | Male   | Rainfall Quintile 5 (proportion)                       |          |         | X       |          |         | X       |
| Transport injuries                   | Male   | Vehicles - 2+4 wheels (per capita)                     | X        |         |         | X        |         |         |
| Transport injuries                   | Male   | Vehicles - 2 wheels fraction (proportion)              | X        |         |         | X        |         |         |
| Transport injuries                   | Male   | Socio-demographic Index                                |          |         | X       |          |         | X       |
| Transport injuries                   | Female | Alcohol (liters per capita)                            | X        |         |         | X        |         |         |
| Transport injuries                   | Female | Education (years per capita)                           |          |         | X       |          |         | X       |
| Transport injuries                   | Female | LDI (I\$ per capita)                                   |          | X       |         |          | X       |         |
| Transport injuries                   | Female | Population Density (300-500 ppl/sqkm, proportion)      |          | X       |         |          | X       |         |
| Transport injuries                   | Female | Population Density (500-1000 ppl/sqkm, proportion)     |          | X       |         |          | X       |         |
| Transport injuries                   | Female | Rainfall Quintile 5 (proportion)                       |          |         | X       |          |         | X       |
| Transport injuries                   | Female | Vehicles - 2+4 wheels (per capita)                     | X        |         |         | X        |         |         |
| Transport injuries                   | Female | Vehicles - 2 wheels fraction (proportion)              | X        |         |         | X        |         |         |
| Transport injuries                   | Female | Socio-demographic Index                                |          |         | X       |          |         | X       |
| Road injuries                        | Male   | Alcohol (liters per capita)                            | X        |         |         | X        |         |         |
| Road injuries                        | Male   | Education (years per capita)                           |          |         | X       |          |         | X       |
| Road injuries                        | Male   | LDI (I\$ per capita)                                   |          | X       |         |          |         | X       |
| Road injuries                        | Male   | Population 15 to 30 (proportion)                       |          | X       |         |          | X       |         |
| Road injuries                        | Male   | Population Density (300-500 ppl/sqkm, proportion)      |          | X       |         |          | X       |         |
| Road injuries                        | Male   | Population Density (500-1000 ppl/sqkm, proportion)     |          | X       |         |          | X       |         |
| Road injuries                        | Male   | Vehicles - 2+4 wheels (per capita)                     | X        |         |         | X        |         |         |
| Road injuries                        | Male   | Vehicles - 2 wheels (per capita)                       | X        |         |         | X        |         |         |

| Cause                       | Sex    | Covariate                                          | GBD 2015 |         |         | GBD 2016 |         |         |
|-----------------------------|--------|----------------------------------------------------|----------|---------|---------|----------|---------|---------|
|                             |        |                                                    | Level 1  | Level 2 | Level 3 | Level 1  | Level 2 | Level 3 |
| Road injuries               | Male   | Vehicles - 4 wheels (per capita)                   | X        |         |         | X        |         |         |
| Road injuries               | Male   | Vehicles - 2 wheels fraction (proportion)          | X        |         |         | X        |         |         |
| Road injuries               | Male   | Log-transformed SEV scalar: Road Inj               | X        |         |         | X        |         |         |
| Road injuries               | Male   | Socio-demographic Index                            |          |         | X       |          |         | X       |
| Road injuries               | Female | Alcohol (liters per capita)                        | X        |         |         | X        |         |         |
| Road injuries               | Female | Education (years per capita)                       |          |         | X       |          |         | X       |
| Road injuries               | Female | LDI (I\$ per capita)                               |          | X       |         |          |         | X       |
| Road injuries               | Female | Population 15 to 30 (proportion)                   |          | X       |         |          | X       |         |
| Road injuries               | Female | Population Density (300-500 ppl/sqkm, proportion)  |          | X       |         |          | X       |         |
| Road injuries               | Female | Population Density (500-1000 ppl/sqkm, proportion) |          | X       |         |          | X       |         |
| Road injuries               | Female | Vehicles - 2+4 wheels (per capita)                 | X        |         |         | X        |         |         |
| Road injuries               | Female | Vehicles - 2 wheels (per capita)                   | X        |         |         | X        |         |         |
| Road injuries               | Female | Vehicles - 4 wheels (per capita)                   | X        |         |         | X        |         |         |
| Road injuries               | Female | Vehicles - 2 wheels fraction (proportion)          | X        |         |         | X        |         |         |
| Road injuries               | Female | Log-transformed SEV scalar: Road Inj               | X        |         |         | X        |         |         |
| Road injuries               | Female | Socio-demographic Index                            |          |         | X       |          |         | X       |
| Pedestrian road injuries    | Male   | Alcohol (liters per capita)                        | X        |         |         | X        |         |         |
| Pedestrian road injuries    | Male   | Education (years per capita)                       |          |         | X       |          |         | X       |
| Pedestrian road injuries    | Male   | LDI (I\$ per capita)                               |          | X       |         |          | X       |         |
| Pedestrian road injuries    | Male   | Population Density (300-500 ppl/sqkm, proportion)  |          | X       |         |          | X       |         |
| Pedestrian road injuries    | Male   | Population Density (500-1000 ppl/sqkm, proportion) |          | X       |         |          | X       |         |
| Pedestrian road injuries    | Male   | Rainfall Quintile 5 (proportion)                   |          |         | X       |          |         | X       |
| Pedestrian road injuries    | Male   | Vehicles - 2+4 wheels (per capita)                 | X        |         |         | X        |         |         |
| Pedestrian road injuries    | Male   | Vehicles - 2 wheels fraction (proportion)          | X        |         |         | X        |         |         |
| Pedestrian road injuries    | Male   | Log-transformed SEV scalar: Pedest                 | X        |         |         | X        |         |         |
| Pedestrian road injuries    | Male   | Socio-demographic Index                            |          |         | X       |          |         | X       |
| Pedestrian road injuries    | Female | Alcohol (liters per capita)                        | X        |         |         | X        |         |         |
| Pedestrian road injuries    | Female | Education (years per capita)                       |          |         | X       |          |         | X       |
| Pedestrian road injuries    | Female | LDI (I\$ per capita)                               |          | X       |         |          | X       |         |
| Pedestrian road injuries    | Female | Population Density (300-500 ppl/sqkm, proportion)  |          | X       |         |          | X       |         |
| Pedestrian road injuries    | Female | Population Density (500-1000 ppl/sqkm, proportion) |          | X       |         |          | X       |         |
| Pedestrian road injuries    | Female | Rainfall Quintile 5 (proportion)                   |          |         | X       |          |         | X       |
| Pedestrian road injuries    | Female | Vehicles - 2+4 wheels (per capita)                 | X        |         |         | X        |         |         |
| Pedestrian road injuries    | Female | Vehicles - 2 wheels fraction (proportion)          | X        |         |         | X        |         |         |
| Pedestrian road injuries    | Female | Log-transformed SEV scalar: Pedest                 | X        |         |         | X        |         |         |
| Pedestrian road injuries    | Female | Socio-demographic Index                            |          |         | X       |          |         | X       |
| Cyclist road injuries       | Male   | Alcohol (liters per capita)                        | X        |         |         | X        |         |         |
| Cyclist road injuries       | Male   | Education (years per capita)                       |          |         | X       |          |         | X       |
| Cyclist road injuries       | Male   | LDI (I\$ per capita)                               |          | X       |         |          | X       |         |
| Cyclist road injuries       | Male   | Population Density (300-500 ppl/sqkm, proportion)  |          | X       |         |          | X       |         |
| Cyclist road injuries       | Male   | Population Density (500-1000 ppl/sqkm, proportion) |          | X       |         |          | X       |         |
| Cyclist road injuries       | Male   | Vehicles - 2+4 wheels (per capita)                 | X        |         |         | X        |         |         |
| Cyclist road injuries       | Male   | Vehicles - 2 wheels fraction (proportion)          | X        |         |         | X        |         |         |
| Cyclist road injuries       | Male   | Log-transformed SEV scalar: Cyclist                | X        |         |         | X        |         |         |
| Cyclist road injuries       | Male   | Socio-demographic Index                            |          |         | X       |          |         | X       |
| Cyclist road injuries       | Female | Alcohol (liters per capita)                        | X        |         |         | X        |         |         |
| Cyclist road injuries       | Female | Education (years per capita)                       |          |         | X       |          |         | X       |
| Cyclist road injuries       | Female | LDI (I\$ per capita)                               |          | X       |         |          | X       |         |
| Cyclist road injuries       | Female | Population Density (300-500 ppl/sqkm, proportion)  |          | X       |         |          | X       |         |
| Cyclist road injuries       | Female | Population Density (500-1000 ppl/sqkm, proportion) |          | X       |         |          | X       |         |
| Cyclist road injuries       | Female | Vehicles - 2+4 wheels (per capita)                 | X        |         |         | X        |         |         |
| Cyclist road injuries       | Female | Vehicles - 2 wheels fraction (proportion)          | X        |         |         | X        |         |         |
| Cyclist road injuries       | Female | Log-transformed SEV scalar: Cyclist                | X        |         |         | X        |         |         |
| Cyclist road injuries       | Female | Socio-demographic Index                            |          |         | X       |          |         | X       |
| Motorcyclist road injuries  | Female | Alcohol (liters per capita)                        | X        |         |         | X        |         |         |
| Motorcyclist road injuries  | Female | Education (years per capita)                       |          |         | X       |          |         | X       |
| Motorcyclist road injuries  | Female | LDI (I\$ per capita)                               |          | X       |         |          | X       |         |
| Motorcyclist road injuries  | Female | Population Density (300-500 ppl/sqkm, proportion)  |          | X       |         |          | X       |         |
| Motorcyclist road injuries  | Female | Population Density (500-1000 ppl/sqkm, proportion) |          | X       |         |          | X       |         |
| Motorcyclist road injuries  | Female | Rainfall Quintile 5 (proportion)                   |          |         | X       |          |         | X       |
| Motorcyclist road injuries  | Female | Vehicles - 2 wheels (per capita)                   | X        |         |         | X        |         |         |
| Motorcyclist road injuries  | Female | Log-transformed SEV scalar: Mot Cyc                | X        |         |         | X        |         |         |
| Motorcyclist road injuries  | Female | Socio-demographic Index                            |          |         | X       |          |         | X       |
| Motorcyclist road injuries  | Male   | Alcohol (liters per capita)                        | X        |         |         | X        |         |         |
| Motorcyclist road injuries  | Male   | Education (years per capita)                       |          |         | X       |          |         | X       |
| Motorcyclist road injuries  | Male   | LDI (I\$ per capita)                               |          | X       |         |          | X       |         |
| Motorcyclist road injuries  | Male   | Population Density (300-500 ppl/sqkm, proportion)  |          | X       |         |          | X       |         |
| Motorcyclist road injuries  | Male   | Population Density (500-1000 ppl/sqkm, proportion) |          | X       |         |          | X       |         |
| Motorcyclist road injuries  | Male   | Rainfall Quintile 5 (proportion)                   |          |         | X       |          |         | X       |
| Motorcyclist road injuries  | Male   | Vehicles - 2 wheels (per capita)                   | X        |         |         | X        |         |         |
| Motorcyclist road injuries  | Male   | Log-transformed SEV scalar: Mot Cyc                | X        |         |         | X        |         |         |
| Motorcyclist road injuries  | Male   | Socio-demographic Index                            |          |         | X       |          |         | X       |
| Motor vehicle road injuries | Male   | Alcohol (liters per capita)                        | X        |         |         | X        |         |         |
| Motor vehicle road injuries | Male   | Education (years per capita)                       |          |         | X       |          |         | X       |
| Motor vehicle road injuries | Male   | LDI (I\$ per capita)                               |          | X       |         |          |         | X       |
| Motor vehicle road injuries | Male   | Population Density (300-500 ppl/sqkm, proportion)  |          | X       |         |          | X       |         |
| Motor vehicle road injuries | Male   | Population Density (500-1000 ppl/sqkm, proportion) |          | X       |         |          | X       |         |
| Motor vehicle road injuries | Male   | Rainfall Quintile 5 (proportion)                   |          |         | X       |          |         | X       |
| Motor vehicle road injuries | Male   | Vehicles - 4 wheels (per capita)                   | X        |         |         | X        |         |         |
| Motor vehicle road injuries | Male   | Log-transformed SEV scalar: Mot Veh                | X        |         |         | X        |         |         |
| Motor vehicle road injuries | Male   | Socio-demographic Index                            |          |         | X       |          |         | X       |
| Motor vehicle road injuries | Female | Alcohol (liters per capita)                        | X        |         |         | X        |         |         |
| Motor vehicle road injuries | Female | Education (years per capita)                       |          |         | X       |          |         | X       |
| Motor vehicle road injuries | Female | LDI (I\$ per capita)                               |          | X       |         |          |         | X       |
| Motor vehicle road injuries | Female | Population Density (300-500 ppl/sqkm, proportion)  |          | X       |         |          | X       |         |

| Cause                       | Sex    | Covariate                                              | GBD 2015 |         |         | GBD 2016 |         |         |
|-----------------------------|--------|--------------------------------------------------------|----------|---------|---------|----------|---------|---------|
|                             |        |                                                        | Level 1  | Level 2 | Level 3 | Level 1  | Level 2 | Level 3 |
| Motor vehicle road injuries | Female | Population Density (500-1000 ppl/sqkm, proportion)     |          | X       |         |          | X       |         |
| Motor vehicle road injuries | Female | Rainfall Quintile 5 (proportion)                       |          |         | X       |          |         | X       |
| Motor vehicle road injuries | Female | Vehicles - 4 wheels (per capita)                       | X        |         |         | X        |         |         |
| Motor vehicle road injuries | Female | Log-transformed SEV scalar: Mot Veh                    | X        |         |         | X        |         |         |
| Motor vehicle road injuries | Female | Socio-demographic Index                                |          |         | X       |          |         | X       |
| Other road injuries         | Male   | Alcohol (liters per capita)                            | X        |         |         | X        |         |         |
| Other road injuries         | Male   | LDI (IS per capita)                                    |          | X       |         |          | X       |         |
| Other road injuries         | Male   | Rainfall Quintile 5 (proportion)                       |          |         | X       |          |         | X       |
| Other road injuries         | Male   | Vehicles - 2+4 wheels (per capita)                     | X        |         |         | X        |         |         |
| Other road injuries         | Male   | Vehicles - 2 wheels fraction (proportion)              | X        |         |         | X        |         |         |
| Other road injuries         | Male   | Log-transformed SEV scalar: Oth Road                   | X        |         |         | X        |         |         |
| Other road injuries         | Male   | Socio-demographic Index                                |          |         | X       |          |         | X       |
| Other road injuries         | Female | Alcohol (liters per capita)                            | X        |         |         | X        |         |         |
| Other road injuries         | Female | LDI (IS per capita)                                    |          | X       |         |          | X       |         |
| Other road injuries         | Female | Rainfall Quintile 5 (proportion)                       |          |         | X       |          |         | X       |
| Other road injuries         | Female | Vehicles - 2+4 wheels (per capita)                     | X        |         |         | X        |         |         |
| Other road injuries         | Female | Vehicles - 2 wheels fraction (proportion)              | X        |         |         | X        |         |         |
| Other road injuries         | Female | Log-transformed SEV scalar: Oth Road                   | X        |         |         | X        |         |         |
| Other road injuries         | Female | Socio-demographic Index                                |          |         | X       |          |         | X       |
| Other transport injuries    | Male   | Alcohol (liters per capita)                            | X        |         |         | X        |         |         |
| Other transport injuries    | Male   | Education (years per capita)                           |          |         | X       |          |         | X       |
| Other transport injuries    | Male   | LDI (IS per capita)                                    |          |         | X       |          |         | X       |
| Other transport injuries    | Male   | Population Density (300-500 ppl/sqkm, proportion)      |          | X       |         |          | X       |         |
| Other transport injuries    | Male   | Population Density (500-1000 ppl/sqkm, proportion)     |          | X       |         |          | X       |         |
| Other transport injuries    | Male   | Rainfall Quintile 5 (proportion)                       |          |         | X       |          |         | X       |
| Other transport injuries    | Male   | Vehicles - 2+4 wheels (per capita)                     | X        |         |         | X        |         |         |
| Other transport injuries    | Male   | Vehicles - 2 wheels fraction (proportion)              | X        |         |         | X        |         |         |
| Other transport injuries    | Male   | Log-transformed SEV scalar: Oth Trans                  | X        |         |         | X        |         |         |
| Other transport injuries    | Male   | Socio-demographic Index                                |          |         | X       |          |         | X       |
| Other transport injuries    | Female | Alcohol (liters per capita)                            | X        |         |         | X        |         |         |
| Other transport injuries    | Female | Education (years per capita)                           |          |         | X       |          |         | X       |
| Other transport injuries    | Female | LDI (IS per capita)                                    |          |         | X       |          |         | X       |
| Other transport injuries    | Female | Population Density (300-500 ppl/sqkm, proportion)      |          | X       |         |          | X       |         |
| Other transport injuries    | Female | Population Density (500-1000 ppl/sqkm, proportion)     |          | X       |         |          | X       |         |
| Other transport injuries    | Female | Rainfall Quintile 5 (proportion)                       |          |         | X       |          |         | X       |
| Other transport injuries    | Female | Vehicles - 2+4 wheels (per capita)                     | X        |         |         | X        |         |         |
| Other transport injuries    | Female | Vehicles - 2 wheels fraction (proportion)              | X        |         |         | X        |         |         |
| Other transport injuries    | Female | Log-transformed SEV scalar: Oth Trans                  | X        |         |         | X        |         |         |
| Other transport injuries    | Female | Socio-demographic Index                                |          |         | X       |          |         | X       |
| Unintentional injuries      | Female | Alcohol (liters per capita)                            |          | X       |         |          | X       |         |
| Unintentional injuries      | Female | Cumulative Cigarettes (5 Years)                        | X        |         |         | X        |         |         |
| Unintentional injuries      | Female | Diabetes Fasting Plasma Glucose (mmol/L)               | X        |         |         | X        |         |         |
| Unintentional injuries      | Female | Education (years per capita)                           |          |         | X       |          |         | X       |
| Unintentional injuries      | Female | Health System Access 2 (unitless)                      | X        |         |         | X        |         |         |
| Unintentional injuries      | Female | LDI (IS per capita)                                    |          |         | X       |          |         | X       |
| Unintentional injuries      | Female | Underweight (proportion <2SD weight for age, <5 years) | X        |         |         | X        |         |         |
| Unintentional injuries      | Female | Indoor Air Pollution (All Cooking Fuels)               | X        |         |         | X        |         |         |
| Unintentional injuries      | Female | Population Density (500-1000 ppl/sqkm, proportion)     |          | X       |         |          | X       |         |
| Unintentional injuries      | Female | Population Density (over 1000 ppl/sqkm, proportion)    |          | X       |         |          | X       |         |
| Unintentional injuries      | Female | Smoking Prevalence                                     | X        |         |         | X        |         |         |
| Unintentional injuries      | Male   | Alcohol (liters per capita)                            |          | X       |         |          | X       |         |
| Unintentional injuries      | Male   | Cumulative Cigarettes (5 Years)                        | X        |         |         | X        |         |         |
| Unintentional injuries      | Male   | Diabetes Fasting Plasma Glucose (mmol/L)               | X        |         |         | X        |         |         |
| Unintentional injuries      | Male   | Education (years per capita)                           |          |         | X       |          |         | X       |
| Unintentional injuries      | Male   | Health System Access 2 (unitless)                      | X        |         |         | X        |         |         |
| Unintentional injuries      | Male   | LDI (IS per capita)                                    |          |         | X       |          |         | X       |
| Unintentional injuries      | Male   | Underweight (proportion <2SD weight for age, <5 years) | X        |         |         | X        |         |         |
| Unintentional injuries      | Male   | Indoor Air Pollution (All Cooking Fuels)               | X        |         |         | X        |         |         |
| Unintentional injuries      | Male   | Population Density (500-1000 ppl/sqkm, proportion)     |          | X       |         |          | X       |         |
| Unintentional injuries      | Male   | Population Density (over 1000 ppl/sqkm, proportion)    |          | X       |         |          | X       |         |
| Unintentional injuries      | Male   | Smoking Prevalence                                     | X        |         |         | X        |         |         |
| Falls                       | Male   | Alcohol (liters per capita)                            |          | X       |         |          | X       |         |
| Falls                       | Male   | LDI (IS per capita)                                    |          |         | X       |          |         | X       |
| Falls                       | Male   | In-Milk (kcal per capita)                              |          | X       |         |          | X       |         |
| Falls                       | Male   | Elevation Over 1500m (proportion)                      |          |         | X       |          |         | X       |
| Falls                       | Male   | Log-transformed SEV scalar: Falls                      | X        |         |         | X        |         |         |
| Falls                       | Male   | Socio-demographic Index                                |          |         | X       |          |         | X       |
| Falls                       | Female | Alcohol (liters per capita)                            | X        |         |         | X        |         |         |
| Falls                       | Female | LDI (IS per capita)                                    |          |         | X       |          |         | X       |
| Falls                       | Female | In-Milk (kcal per capita)                              |          | X       |         |          | X       |         |
| Falls                       | Female | Elevation Over 1500m (proportion)                      |          |         | X       |          |         | X       |
| Falls                       | Female | Log-transformed SEV scalar: Falls                      | X        |         |         | X        |         |         |
| Falls                       | Female | Socio-demographic Index                                |          |         | X       |          |         | X       |
| Drowning                    | Male   | Alcohol (liters per capita)                            | X        |         |         | X        |         |         |
| Drowning                    | Male   | Coastal Population within 10km (proportion)            | X        |         |         | X        |         |         |
| Drowning                    | Male   | Education (years per capita)                           |          |         | X       |          |         | X       |
| Drowning                    | Male   | Landlocked Nation (binary)                             | X        |         |         | X        |         |         |
| Drowning                    | Male   | LDI (IS per capita)                                    |          |         | X       |          |         | X       |
| Drowning                    | Male   | Elevation Under 100m (proportion)                      |          | X       |         |          | X       |         |
| Drowning                    | Male   | Rainfall Quintile 1 (proportion)                       | X        |         |         | X        |         |         |
| Drowning                    | Male   | Rainfall Quintile 5 (proportion)                       | X        |         |         | X        |         |         |
| Drowning                    | Male   | Log-transformed SEV scalar: Drown                      | X        |         |         | X        |         |         |
| Drowning                    | Male   | Socio-demographic Index                                |          |         | X       |          |         | X       |
| Drowning                    | Female | Alcohol (liters per capita)                            | X        |         |         | X        |         |         |
| Drowning                    | Female | Coastal Population within 10km (proportion)            | X        |         |         | X        |         |         |

| Cause                               | Sex    | Covariate                                           | GBD 2015 |         |         | GBD 2016 |         |         |
|-------------------------------------|--------|-----------------------------------------------------|----------|---------|---------|----------|---------|---------|
|                                     |        |                                                     | Level 1  | Level 2 | Level 3 | Level 1  | Level 2 | Level 3 |
| Drowning                            | Female | Education (years per capita)                        |          |         | X       |          |         | X       |
| Drowning                            | Female | Landlocked Nation (binary)                          | X        |         |         | X        |         |         |
| Drowning                            | Female | LDI (IS per capita)                                 |          |         | X       |          |         | X       |
| Drowning                            | Female | Elevation Under 100m (proportion)                   |          | X       |         |          | X       |         |
| Drowning                            | Female | Rainfall Quintile 1 (proportion)                    | X        |         |         | X        |         |         |
| Drowning                            | Female | Rainfall Quintile 5 (proportion)                    | X        |         |         | X        |         |         |
| Drowning                            | Female | Log-transformed SEV scalar: Drown                   | X        |         |         | X        |         |         |
| Drowning                            | Female | Socio-demographic Index                             |          |         | X       |          |         | X       |
| Fire, heat, and hot substances      | Male   | Alcohol (liters per capita)                         |          | X       |         |          | X       |         |
| Fire, heat, and hot substances      | Male   | Tobacco (cigarettes per capita)                     |          | X       |         |          | X       |         |
| Fire, heat, and hot substances      | Male   | Education (years per capita)                        |          |         | X       |          |         | X       |
| Fire, heat, and hot substances      | Male   | LDI (IS per capita)                                 |          |         | X       |          |         | X       |
| Fire, heat, and hot substances      | Male   | Indoor Air Pollution (Biomass Cooking)              |          | X       |         |          | X       |         |
| Fire, heat, and hot substances      | Male   | Population Density (over 1000 ppl/sqkm, proportion) |          | X       |         |          | X       |         |
| Fire, heat, and hot substances      | Male   | Log-transformed SEV scalar: Fire                    | X        |         |         | X        |         |         |
| Fire, heat, and hot substances      | Male   | Socio-demographic Index                             |          |         | X       |          |         | X       |
| Fire, heat, and hot substances      | Female | Alcohol (liters per capita)                         |          | X       |         |          | X       |         |
| Fire, heat, and hot substances      | Female | Tobacco (cigarettes per capita)                     |          | X       |         |          | X       |         |
| Fire, heat, and hot substances      | Female | Education (years per capita)                        |          |         | X       |          |         | X       |
| Fire, heat, and hot substances      | Female | LDI (IS per capita)                                 |          |         | X       |          |         | X       |
| Fire, heat, and hot substances      | Female | Indoor Air Pollution (Biomass Cooking)              |          | X       |         |          | X       |         |
| Fire, heat, and hot substances      | Female | Population Density (over 1000 ppl/sqkm, proportion) |          | X       |         |          | X       |         |
| Fire, heat, and hot substances      | Female | Log-transformed SEV scalar: Fire                    | X        |         |         | X        |         |         |
| Fire, heat, and hot substances      | Female | Socio-demographic Index                             |          |         | X       |          |         | X       |
| Poisonings                          | Female | Education (years per capita)                        |          |         | X       |          |         | X       |
| Poisonings                          | Female | LDI (IS per capita)                                 |          |         | X       |          |         | X       |
| Poisonings                          | Female | Opium Cultivation (binary)                          | X        |         |         | X        |         |         |
| Poisonings                          | Female | Population Density (over 1000 ppl/sqkm, proportion) |          | X       |         |          | X       |         |
| Poisonings                          | Female | Population Density (under 150 ppl/sqkm, proportion) |          | X       |         |          | X       |         |
| Poisonings                          | Female | Log-transformed SEV scalar: Poison                  | X        |         |         | X        |         |         |
| Poisonings                          | Female | Socio-demographic Index                             |          |         | X       |          |         | X       |
| Poisonings                          | Male   | Education (years per capita)                        |          |         | X       |          |         | X       |
| Poisonings                          | Male   | LDI (IS per capita)                                 |          |         | X       |          |         | X       |
| Poisonings                          | Male   | Opium Cultivation (binary)                          | X        |         |         | X        |         |         |
| Poisonings                          | Male   | Population Density (over 1000 ppl/sqkm, proportion) |          | X       |         |          | X       |         |
| Poisonings                          | Male   | Population Density (under 150 ppl/sqkm, proportion) |          | X       |         |          | X       |         |
| Poisonings                          | Male   | Log-transformed SEV scalar: Poison                  | X        |         |         | X        |         |         |
| Poisonings                          | Male   | Socio-demographic Index                             |          |         | X       |          |         | X       |
| Exposure to mechanical forces       | Male   | Alcohol (liters per capita)                         |          | X       |         |          | X       |         |
| Exposure to mechanical forces       | Male   | Education (years per capita)                        |          |         | X       |          |         | X       |
| Exposure to mechanical forces       | Male   | LDI (IS per capita)                                 |          |         | X       |          |         | X       |
| Exposure to mechanical forces       | Male   | Population Density (over 1000 ppl/sqkm, proportion) |          | X       |         |          | X       |         |
| Exposure to mechanical forces       | Male   | Population Density (under 150 ppl/sqkm, proportion) |          | X       |         |          | X       |         |
| Exposure to mechanical forces       | Male   | Socio-demographic Index                             |          |         | X       |          |         | X       |
| Exposure to mechanical forces       | Female | Alcohol (liters per capita)                         |          | X       |         |          | X       |         |
| Exposure to mechanical forces       | Female | Education (years per capita)                        |          |         | X       |          |         | X       |
| Exposure to mechanical forces       | Female | LDI (IS per capita)                                 |          |         | X       |          |         | X       |
| Exposure to mechanical forces       | Female | Population Density (over 1000 ppl/sqkm, proportion) |          | X       |         |          | X       |         |
| Exposure to mechanical forces       | Female | Population Density (under 150 ppl/sqkm, proportion) |          | X       |         |          | X       |         |
| Exposure to mechanical forces       | Female | Socio-demographic Index                             |          |         | X       |          |         | X       |
| Unintentional firearm injuries      | Male   | Alcohol (liters per capita)                         |          | X       |         |          | X       |         |
| Unintentional firearm injuries      | Male   | Education (years per capita)                        |          |         | X       |          |         | X       |
| Unintentional firearm injuries      | Male   | Health System Access (unitless)                     |          | X       |         |          | X       |         |
| Unintentional firearm injuries      | Male   | LDI (IS per capita)                                 |          |         | X       |          |         | X       |
| Unintentional firearm injuries      | Male   | Population Density (over 1000 ppl/sqkm, proportion) |          |         | X       |          |         | X       |
| Unintentional firearm injuries      | Male   | Population Density (under 150 ppl/sqkm, proportion) |          |         | X       |          |         | X       |
| Unintentional firearm injuries      | Male   | Log-transformed SEV scalar: Mech Gun                | X        |         |         | X        |         |         |
| Unintentional firearm injuries      | Male   | Socio-demographic Index                             |          |         | X       |          |         | X       |
| Unintentional firearm injuries      | Female | Alcohol (liters per capita)                         |          | X       |         |          | X       |         |
| Unintentional firearm injuries      | Female | Education (years per capita)                        |          |         | X       |          |         | X       |
| Unintentional firearm injuries      | Female | Health System Access (unitless)                     |          | X       |         |          | X       |         |
| Unintentional firearm injuries      | Female | LDI (IS per capita)                                 |          |         | X       |          |         | X       |
| Unintentional firearm injuries      | Female | Population Density (over 1000 ppl/sqkm, proportion) |          |         | X       |          |         | X       |
| Unintentional firearm injuries      | Female | Population Density (under 150 ppl/sqkm, proportion) |          |         | X       |          |         | X       |
| Unintentional firearm injuries      | Female | Log-transformed SEV scalar: Mech Gun                | X        |         |         | X        |         |         |
| Unintentional firearm injuries      | Female | Socio-demographic Index                             |          |         | X       |          |         | X       |
| Unintentional suffocation           | Male   | Alcohol (liters per capita)                         |          | X       |         |          | X       |         |
| Unintentional suffocation           | Male   | Education (years per capita)                        |          |         | X       |          |         | X       |
| Unintentional suffocation           | Male   | LDI (IS per capita)                                 |          |         | X       |          |         | X       |
| Unintentional suffocation           | Male   | Population Density (over 1000 ppl/sqkm, proportion) |          | X       |         |          | X       |         |
| Unintentional suffocation           | Male   | Population Density (under 150 ppl/sqkm, proportion) |          | X       |         |          | X       |         |
| Unintentional suffocation           | Male   | Log-transformed SEV scalar: Mech Suff               | X        |         |         | X        |         |         |
| Unintentional suffocation           | Male   | Socio-demographic Index                             |          |         | X       |          |         | X       |
| Unintentional suffocation           | Female | Alcohol (liters per capita)                         |          | X       |         |          | X       |         |
| Unintentional suffocation           | Female | Education (years per capita)                        |          |         | X       |          |         | X       |
| Unintentional suffocation           | Female | LDI (IS per capita)                                 |          |         | X       |          |         | X       |
| Unintentional suffocation           | Female | Population Density (over 1000 ppl/sqkm, proportion) |          | X       |         |          | X       |         |
| Unintentional suffocation           | Female | Population Density (under 150 ppl/sqkm, proportion) |          | X       |         |          | X       |         |
| Unintentional suffocation           | Female | Log-transformed SEV scalar: Mech Suff               | X        |         |         | X        |         |         |
| Unintentional suffocation           | Female | Socio-demographic Index                             |          |         | X       |          |         | X       |
| Other exposure to mechanical forces | Male   | Alcohol (liters per capita)                         |          | X       |         |          | X       |         |
| Other exposure to mechanical forces | Male   | Education (years per capita)                        |          |         | X       |          |         | X       |
| Other exposure to mechanical forces | Male   | Health System Access (unitless)                     |          | X       |         |          | X       |         |
| Other exposure to mechanical forces | Male   | LDI (IS per capita)                                 |          |         | X       |          |         | X       |
| Other exposure to mechanical forces | Male   | Population Density (over 1000 ppl/sqkm, proportion) |          | X       |         |          | X       |         |

| Cause                                           | Sex    | Covariate                                           | GBD 2015 |         |         | GBD 2016 |         |         |
|-------------------------------------------------|--------|-----------------------------------------------------|----------|---------|---------|----------|---------|---------|
|                                                 |        |                                                     | Level 1  | Level 2 | Level 3 | Level 1  | Level 2 | Level 3 |
| Other exposure to mechanical forces             | Male   | Population Density (under 150 ppl/sqkm, proportion) |          | X       |         |          | X       |         |
| Other exposure to mechanical forces             | Male   | Log-transformed SEV scalar: Oth Mech                | X        |         |         | X        |         |         |
| Other exposure to mechanical forces             | Male   | Socio-demographic Index                             |          |         | X       |          |         | X       |
| Other exposure to mechanical forces             | Female | Alcohol (liters per capita)                         |          | X       |         |          | X       |         |
| Other exposure to mechanical forces             | Female | Education (years per capita)                        |          |         | X       |          |         | X       |
| Other exposure to mechanical forces             | Female | Health System Access (unitless)                     |          | X       |         |          | X       |         |
| Other exposure to mechanical forces             | Female | LDI (I\$ per capita)                                |          |         | X       |          |         | X       |
| Other exposure to mechanical forces             | Female | Population Density (over 1000 ppl/sqkm, proportion) |          | X       |         |          | X       |         |
| Other exposure to mechanical forces             | Female | Population Density (under 150 ppl/sqkm, proportion) |          | X       |         |          | X       |         |
| Other exposure to mechanical forces             | Female | Log-transformed SEV scalar: Oth Mech                | X        |         |         | X        |         |         |
| Other exposure to mechanical forces             | Female | Socio-demographic Index                             |          |         | X       |          |         | X       |
| Adverse effects of medical treatment            | Male   | LDI (I\$ per capita)                                |          |         | X       |          |         | X       |
| Adverse effects of medical treatment            | Male   | Socio-demographic Index                             |          |         | X       |          |         | X       |
| Adverse effects of medical treatment            | Female | LDI (I\$ per capita)                                |          |         | X       |          |         | X       |
| Adverse effects of medical treatment            | Female | Socio-demographic Index                             |          |         | X       |          |         | X       |
| Animal contact                                  | Male   | Alcohol (liters per capita)                         | X        |         |         | X        |         |         |
| Animal contact                                  | Male   | Education (years per capita)                        |          |         | X       |          |         | X       |
| Animal contact                                  | Male   | LDI (I\$ per capita)                                |          |         | X       |          |         | X       |
| Animal contact                                  | Male   | Elevation Over 1500m (proportion)                   |          |         | X       |          |         | X       |
| Animal contact                                  | Male   | Population 15 to 30 (proportion)                    |          | X       |         |          | X       |         |
| Animal contact                                  | Male   | Population Density (over 1000 ppl/sqkm, proportion) |          |         | X       |          |         | X       |
| Animal contact                                  | Male   | Population Density (under 150 ppl/sqkm, proportion) |          |         | X       |          |         | X       |
| Animal contact                                  | Male   | Elevation Under 100m (proportion)                   |          |         | X       |          |         | X       |
| Animal contact                                  | Male   | Log-transformed SEV scalar: Animal                  | X        |         |         | X        |         |         |
| Animal contact                                  | Male   | Socio-demographic Index                             |          |         | X       |          |         | X       |
| Animal contact                                  | Female | Alcohol (liters per capita)                         | X        |         |         | X        |         |         |
| Animal contact                                  | Female | Education (years per capita)                        |          |         | X       |          |         | X       |
| Animal contact                                  | Female | LDI (I\$ per capita)                                |          |         | X       |          |         | X       |
| Animal contact                                  | Female | Elevation Over 1500m (proportion)                   |          |         | X       |          |         | X       |
| Animal contact                                  | Female | Population 15 to 30 (proportion)                    |          | X       |         |          | X       |         |
| Animal contact                                  | Female | Population Density (over 1000 ppl/sqkm, proportion) |          |         | X       |          |         | X       |
| Animal contact                                  | Female | Population Density (under 150 ppl/sqkm, proportion) |          |         | X       |          |         | X       |
| Animal contact                                  | Female | Elevation Under 100m (proportion)                   |          |         | X       |          |         | X       |
| Animal contact                                  | Female | Log-transformed SEV scalar: Animal                  | X        |         |         | X        |         |         |
| Animal contact                                  | Female | Socio-demographic Index                             |          |         | X       |          |         | X       |
| Venomous animal contact                         | Male   | Alcohol (liters per capita)                         | X        |         |         | X        |         |         |
| Venomous animal contact                         | Male   | Education (years per capita)                        |          |         | X       |          |         | X       |
| Venomous animal contact                         | Male   | LDI (I\$ per capita)                                |          |         | X       |          |         | X       |
| Venomous animal contact                         | Male   | Elevation Over 1500m (proportion)                   |          |         | X       |          |         | X       |
| Venomous animal contact                         | Male   | Population Density (over 1000 ppl/sqkm, proportion) |          |         | X       |          |         | X       |
| Venomous animal contact                         | Male   | Population Density (under 150 ppl/sqkm, proportion) |          |         | X       |          |         | X       |
| Venomous animal contact                         | Male   | Elevation Under 100m (proportion)                   |          |         | X       |          |         | X       |
| Venomous animal contact                         | Male   | Log-transformed SEV scalar: Venom                   | X        |         |         | X        |         |         |
| Venomous animal contact                         | Male   | Socio-demographic Index                             |          |         | X       |          |         | X       |
| Venomous animal contact                         | Female | Alcohol (liters per capita)                         | X        |         |         | X        |         |         |
| Venomous animal contact                         | Female | Education (years per capita)                        |          |         | X       |          |         | X       |
| Venomous animal contact                         | Female | LDI (I\$ per capita)                                |          |         | X       |          |         | X       |
| Venomous animal contact                         | Female | Elevation Over 1500m (proportion)                   |          |         | X       |          |         | X       |
| Venomous animal contact                         | Female | Population Density (over 1000 ppl/sqkm, proportion) |          |         | X       |          |         | X       |
| Venomous animal contact                         | Female | Population Density (under 150 ppl/sqkm, proportion) |          |         | X       |          |         | X       |
| Venomous animal contact                         | Female | Elevation Under 100m (proportion)                   |          |         | X       |          |         | X       |
| Venomous animal contact                         | Female | Log-transformed SEV scalar: Venom                   | X        |         |         | X        |         |         |
| Venomous animal contact                         | Female | Socio-demographic Index                             |          |         | X       |          |         | X       |
| Non-venomous animal contact                     | Male   | Alcohol (liters per capita)                         | X        |         |         | X        |         |         |
| Non-venomous animal contact                     | Male   | Education (years per capita)                        |          |         | X       |          |         | X       |
| Non-venomous animal contact                     | Male   | LDI (I\$ per capita)                                |          |         | X       |          |         | X       |
| Non-venomous animal contact                     | Male   | Elevation Over 1500m (proportion)                   |          |         | X       |          |         | X       |
| Non-venomous animal contact                     | Male   | Population Density (over 1000 ppl/sqkm, proportion) |          |         | X       |          |         | X       |
| Non-venomous animal contact                     | Male   | Population Density (under 150 ppl/sqkm, proportion) |          |         | X       |          |         | X       |
| Non-venomous animal contact                     | Male   | Elevation Under 100m (proportion)                   |          |         | X       |          |         | X       |
| Non-venomous animal contact                     | Male   | Log-transformed SEV scalar: Non Ven                 | X        |         |         | X        |         |         |
| Non-venomous animal contact                     | Male   | Socio-demographic Index                             |          |         | X       |          |         | X       |
| Non-venomous animal contact                     | Female | Alcohol (liters per capita)                         | X        |         |         | X        |         |         |
| Non-venomous animal contact                     | Female | Education (years per capita)                        |          |         | X       |          |         | X       |
| Non-venomous animal contact                     | Female | LDI (I\$ per capita)                                |          |         | X       |          |         | X       |
| Non-venomous animal contact                     | Female | Elevation Over 1500m (proportion)                   |          |         | X       |          |         | X       |
| Non-venomous animal contact                     | Female | Population Density (over 1000 ppl/sqkm, proportion) |          |         | X       |          |         | X       |
| Non-venomous animal contact                     | Female | Population Density (under 150 ppl/sqkm, proportion) |          |         | X       |          |         | X       |
| Non-venomous animal contact                     | Female | Elevation Under 100m (proportion)                   |          |         | X       |          |         | X       |
| Non-venomous animal contact                     | Female | Log-transformed SEV scalar: Non Ven                 | X        |         |         | X        |         |         |
| Non-venomous animal contact                     | Female | Socio-demographic Index                             |          |         | X       |          |         | X       |
| Foreign body                                    | Male   | Education (years per capita)                        | X        |         |         | X        |         |         |
| Foreign body                                    | Male   | LDI (I\$ per capita)                                | X        |         |         | X        |         |         |
| Foreign body                                    | Male   | Population Density (over 1000 ppl/sqkm, proportion) | X        |         |         | X        |         |         |
| Foreign body                                    | Male   | Population Over 65 (proportion)                     | X        |         |         | X        |         |         |
| Foreign body                                    | Male   | Socio-demographic Index                             |          |         | X       |          |         | X       |
| Foreign body                                    | Female | Education (years per capita)                        | X        |         |         | X        |         |         |
| Foreign body                                    | Female | LDI (I\$ per capita)                                | X        |         |         | X        |         |         |
| Foreign body                                    | Female | Population Density (over 1000 ppl/sqkm, proportion) | X        |         |         | X        |         |         |
| Foreign body                                    | Female | Population Over 65 (proportion)                     | X        |         |         | X        |         |         |
| Foreign body                                    | Female | Socio-demographic Index                             |          |         | X       |          |         | X       |
| Pulmonary aspiration and foreign body in airway | Male   | Alcohol (liters per capita)                         |          | X       |         |          | X       |         |
| Pulmonary aspiration and foreign body in airway | Male   | LDI (I\$ per capita)                                |          |         | X       |          |         | X       |
| Pulmonary aspiration and foreign body in airway | Male   | Mean BMI                                            |          | X       |         |          | X       |         |
| Pulmonary aspiration and foreign body in airway | Male   | Log-transformed SEV scalar: F Body Asp              | X        |         |         | X        |         |         |

| Cause                                           | Sex    | Covariate                                           | GBD 2015 |         |         | GBD 2016 |         |         |
|-------------------------------------------------|--------|-----------------------------------------------------|----------|---------|---------|----------|---------|---------|
|                                                 |        |                                                     | Level 1  | Level 2 | Level 3 | Level 1  | Level 2 | Level 3 |
| Pulmonary aspiration and foreign body in airway | Male   | Socio-demographic Index                             |          |         | X       |          |         | X       |
| Pulmonary aspiration and foreign body in airway | Female | Alcohol (liters per capita)                         |          | X       |         |          | X       |         |
| Pulmonary aspiration and foreign body in airway | Female | LDI (US\$ per capita)                               |          |         | X       |          |         | X       |
| Pulmonary aspiration and foreign body in airway | Female | Mean BMI                                            |          | X       |         |          | X       |         |
| Pulmonary aspiration and foreign body in airway | Female | Log-transformed SEV scalar: F Body Asp              | X        |         |         | X        |         |         |
| Pulmonary aspiration and foreign body in airway | Female | Socio-demographic Index                             |          |         | X       |          |         | X       |
| Foreign body in other body part                 | Male   | Alcohol (liters per capita)                         | X        |         |         | X        |         |         |
| Foreign body in other body part                 | Male   | Education (years per capita)                        |          |         | X       |          |         | X       |
| Foreign body in other body part                 | Male   | LDI (US\$ per capita)                               |          |         | X       |          |         | X       |
| Foreign body in other body part                 | Male   | Elevation Over 1500m (proportion)                   |          |         | X       |          |         | X       |
| Foreign body in other body part                 | Male   | Population Density (over 1000 ppl/sqkm, proportion) |          |         | X       |          |         | X       |
| Foreign body in other body part                 | Male   | Population Density (under 150 ppl/sqkm, proportion) |          |         | X       |          |         | X       |
| Foreign body in other body part                 | Male   | Elevation Under 100m (proportion)                   |          |         | X       |          |         | X       |
| Foreign body in other body part                 | Male   | Log-transformed SEV scalar: Oth F Body              | X        |         |         | X        |         |         |
| Foreign body in other body part                 | Male   | Socio-demographic Index                             |          |         | X       |          |         | X       |
| Foreign body in other body part                 | Female | Alcohol (liters per capita)                         | X        |         |         | X        |         |         |
| Foreign body in other body part                 | Female | Education (years per capita)                        |          |         | X       |          |         | X       |
| Foreign body in other body part                 | Female | LDI (US\$ per capita)                               |          |         | X       |          |         | X       |
| Foreign body in other body part                 | Female | Elevation Over 1500m (proportion)                   |          |         | X       |          |         | X       |
| Foreign body in other body part                 | Female | Population Density (over 1000 ppl/sqkm, proportion) |          |         | X       |          |         | X       |
| Foreign body in other body part                 | Female | Population Density (under 150 ppl/sqkm, proportion) |          |         | X       |          |         | X       |
| Foreign body in other body part                 | Female | Elevation Under 100m (proportion)                   |          |         | X       |          |         | X       |
| Foreign body in other body part                 | Female | Log-transformed SEV scalar: Oth F Body              | X        |         |         | X        |         |         |
| Foreign body in other body part                 | Female | Socio-demographic Index                             |          |         | X       |          |         | X       |
| Other unintentional injuries                    | Male   | Alcohol (liters per capita)                         | X        |         |         | X        |         |         |
| Other unintentional injuries                    | Male   | Education (years per capita)                        |          |         | X       |          |         | X       |
| Other unintentional injuries                    | Male   | LDI (US\$ per capita)                               |          |         | X       |          |         | X       |
| Other unintentional injuries                    | Male   | Elevation Over 1500m (proportion)                   |          |         | X       |          |         | X       |
| Other unintentional injuries                    | Male   | Population Density (over 1000 ppl/sqkm, proportion) |          |         | X       |          |         | X       |
| Other unintentional injuries                    | Male   | Population Density (under 150 ppl/sqkm, proportion) |          |         | X       |          |         | X       |
| Other unintentional injuries                    | Male   | Elevation Under 100m (proportion)                   |          |         | X       |          |         | X       |
| Other unintentional injuries                    | Male   | Vehicles - 2 wheels (per capita)                    | X        |         |         | X        |         |         |
| Other unintentional injuries                    | Male   | Vehicles - 4 wheels (per capita)                    | X        |         |         | X        |         |         |
| Other unintentional injuries                    | Male   | Log-transformed SEV scalar: Oth Unint               | X        |         |         | X        |         |         |
| Other unintentional injuries                    | Male   | Socio-demographic Index                             |          |         | X       |          |         | X       |
| Other unintentional injuries                    | Female | Alcohol (liters per capita)                         | X        |         |         | X        |         |         |
| Other unintentional injuries                    | Female | Education (years per capita)                        |          |         | X       |          |         | X       |
| Other unintentional injuries                    | Female | LDI (US\$ per capita)                               |          |         | X       |          |         | X       |
| Other unintentional injuries                    | Female | Elevation Over 1500m (proportion)                   |          |         | X       |          |         | X       |
| Other unintentional injuries                    | Female | Population Density (over 1000 ppl/sqkm, proportion) |          |         | X       |          |         | X       |
| Other unintentional injuries                    | Female | Population Density (under 150 ppl/sqkm, proportion) |          |         | X       |          |         | X       |
| Other unintentional injuries                    | Female | Elevation Under 100m (proportion)                   |          |         | X       |          |         | X       |
| Other unintentional injuries                    | Female | Vehicles - 2 wheels (per capita)                    | X        |         |         | X        |         |         |
| Other unintentional injuries                    | Female | Vehicles - 4 wheels (per capita)                    | X        |         |         | X        |         |         |
| Other unintentional injuries                    | Female | Log-transformed SEV scalar: Oth Unint               | X        |         |         | X        |         |         |
| Other unintentional injuries                    | Female | Socio-demographic Index                             |          |         | X       |          |         | X       |
| Self-harm and interpersonal violence            | Male   | Alcohol (liters per capita)                         | X        |         |         | X        |         |         |
| Self-harm and interpersonal violence            | Male   | Education (years per capita)                        |          |         | X       |          |         | X       |
| Self-harm and interpersonal violence            | Male   | LDI (US\$ per capita)                               |          |         | X       |          |         | X       |
| Self-harm and interpersonal violence            | Male   | Elevation Over 1500m (proportion)                   |          |         | X       |          |         | X       |
| Self-harm and interpersonal violence            | Male   | Population Density (over 1000 ppl/sqkm, proportion) |          |         | X       |          |         | X       |
| Self-harm and interpersonal violence            | Male   | Population Density (under 150 ppl/sqkm, proportion) |          |         | X       |          |         | X       |
| Self-harm and interpersonal violence            | Male   | Elevation Under 100m (proportion)                   |          |         | X       |          |         | X       |
| Self-harm and interpersonal violence            | Male   | Log-transformed SEV scalar: Oth Unint               | X        |         |         | X        |         |         |
| Self-harm and interpersonal violence            | Female | Alcohol (liters per capita)                         | X        |         |         | X        |         |         |
| Self-harm and interpersonal violence            | Female | Education (years per capita)                        |          |         | X       |          |         | X       |
| Self-harm and interpersonal violence            | Female | LDI (US\$ per capita)                               |          |         | X       |          |         | X       |
| Self-harm and interpersonal violence            | Female | Population Density (150-300 ppl/sqkm, proportion)   |          | X       |         |          | X       |         |
| Self-harm and interpersonal violence            | Female | Population Density (300-500 ppl/sqkm, proportion)   |          | X       |         |          | X       |         |
| Self-harm and interpersonal violence            | Female | Population Density (500-1000 ppl/sqkm, proportion)  |          | X       |         |          | X       |         |
| Self-harm and interpersonal violence            | Female | Population Density (over 1000 ppl/sqkm, proportion) |          | X       |         |          | X       |         |
| Self-harm and interpersonal violence            | Female | Population Density (under 150 ppl/sqkm, proportion) |          | X       |         |          | X       |         |
| Self-harm and interpersonal violence            | Female | Elevation Under 100m (proportion)                   |          | X       |         |          | X       |         |
| Self-harm and interpersonal violence            | Female | Log-transformed SEV scalar: Oth Unint               | X        |         |         | X        |         |         |
| Self-harm                                       | Male   | Alcohol (liters per capita)                         | X        |         |         | X        |         |         |
| Self-harm                                       | Male   | Education (years per capita)                        |          |         | X       |          |         | X       |
| Self-harm                                       | Male   | LDI (US\$ per capita)                               |          |         | X       |          |         | X       |
| Self-harm                                       | Male   | Population Density (150-300 ppl/sqkm, proportion)   |          | X       |         |          | X       |         |
| Self-harm                                       | Male   | Population Density (300-500 ppl/sqkm, proportion)   |          | X       |         |          | X       |         |
| Self-harm                                       | Male   | Population Density (500-1000 ppl/sqkm, proportion)  |          | X       |         |          | X       |         |
| Self-harm                                       | Male   | Population Density (over 1000 ppl/sqkm, proportion) |          | X       |         |          | X       |         |
| Self-harm                                       | Male   | Population Density (under 150 ppl/sqkm, proportion) |          | X       |         |          | X       |         |
| Self-harm                                       | Male   | Religion (binary, >50% Muslim)                      |          | X       |         |          | X       |         |
| Self-harm                                       | Male   | Socio-demographic Index                             |          |         | X       |          |         | X       |
| Self-harm                                       | Female | Alcohol (liters per capita)                         | X        |         |         | X        |         |         |
| Self-harm                                       | Female | Education (years per capita)                        |          |         | X       |          |         | X       |
| Self-harm                                       | Female | LDI (US\$ per capita)                               |          |         | X       |          |         | X       |
| Self-harm                                       | Female | Population Density (150-300 ppl/sqkm, proportion)   |          | X       |         |          | X       |         |
| Self-harm                                       | Female | Population Density (300-500 ppl/sqkm, proportion)   |          | X       |         |          | X       |         |
| Self-harm                                       | Female | Population Density (500-1000 ppl/sqkm, proportion)  |          | X       |         |          | X       |         |
| Self-harm                                       | Female | Population Density (over 1000 ppl/sqkm, proportion) |          | X       |         |          | X       |         |
| Self-harm                                       | Female | Population Density (under 150 ppl/sqkm, proportion) |          | X       |         |          | X       |         |
| Self-harm                                       | Female | Religion (binary, >50% Muslim)                      |          | X       |         |          | X       |         |
| Self-harm                                       | Female | Log-transformed SEV scalar: Self Harm               | X        |         |         | X        |         |         |
| Self-harm                                       | Female | Socio-demographic Index                             |          |         | X       |          |         | X       |
| Self-harm                                       | Female | Major depressive disorder                           | X        |         |         | X        |         |         |
| Interpersonal violence                          | Male   | Alcohol (liters per capita)                         | X        |         |         | X        |         |         |

| Cause                                | Sex    | Covariate                                                       | GBD 2015 |         |         | GBD 2016 |         |         |
|--------------------------------------|--------|-----------------------------------------------------------------|----------|---------|---------|----------|---------|---------|
|                                      |        |                                                                 | Level 1  | Level 2 | Level 3 | Level 1  | Level 2 | Level 3 |
| Interpersonal violence               | Male   | Education (years per capita)                                    |          |         | X       |          |         | X       |
| Interpersonal violence               | Male   | LDI (I\$ per capita)                                            |          |         | X       |          |         | X       |
| Interpersonal violence               | Male   | Opium Cultivation (binary)                                      |          | X       |         |          | X       |         |
| Interpersonal violence               | Male   | Population Density (over 1000 ppl/sqkm, proportion)             |          | X       |         |          | X       |         |
| Interpersonal violence               | Male   | Log-transformed SEV scalar: Violence                            | X        |         |         | X        |         |         |
| Interpersonal violence               | Male   | Socio-demographic Index                                         |          |         | X       |          |         | X       |
| Interpersonal violence               | Female | Alcohol (liters per capita)                                     | X        |         |         | X        |         |         |
| Interpersonal violence               | Female | Education (years per capita)                                    |          |         | X       |          |         | X       |
| Interpersonal violence               | Female | LDI (I\$ per capita)                                            |          |         | X       |          |         | X       |
| Interpersonal violence               | Female | Opium Cultivation (binary)                                      |          | X       |         |          | X       |         |
| Interpersonal violence               | Female | Population Density (over 1000 ppl/sqkm, proportion)             |          | X       |         |          | X       |         |
| Interpersonal violence               | Female | Log-transformed SEV scalar: Violence                            | X        |         |         | X        |         |         |
| Interpersonal violence               | Female | Socio-demographic Index                                         |          |         | X       |          |         | X       |
| Physical violence by firearm         | Male   | Alcohol (liters per capita)                                     | X        |         |         | X        |         |         |
| Physical violence by firearm         | Male   | Education (years per capita)                                    |          |         | X       |          |         | X       |
| Physical violence by firearm         | Male   | LDI (I\$ per capita)                                            |          |         | X       |          |         | X       |
| Physical violence by firearm         | Male   | Opium Cultivation (binary)                                      |          | X       |         |          | X       |         |
| Physical violence by firearm         | Male   | Population Density (over 1000 ppl/sqkm, proportion)             |          | X       |         |          | X       |         |
| Physical violence by firearm         | Male   | Log-transformed SEV scalar: Viol Gun                            | X        |         |         | X        |         |         |
| Physical violence by firearm         | Male   | Socio-demographic Index                                         |          |         | X       |          |         | X       |
| Physical violence by firearm         | Female | Alcohol (liters per capita)                                     | X        |         |         | X        |         |         |
| Physical violence by firearm         | Female | Education (years per capita)                                    |          |         | X       |          |         | X       |
| Physical violence by firearm         | Female | LDI (I\$ per capita)                                            |          |         | X       |          |         | X       |
| Physical violence by firearm         | Female | Opium Cultivation (binary)                                      |          | X       |         |          | X       |         |
| Physical violence by firearm         | Female | Population Density (over 1000 ppl/sqkm, proportion)             |          | X       |         |          | X       |         |
| Physical violence by firearm         | Female | Log-transformed SEV scalar: Viol Gun                            | X        |         |         | X        |         |         |
| Physical violence by firearm         | Female | Socio-demographic Index                                         |          |         | X       |          |         | X       |
| Physical violence by sharp object    | Male   | Alcohol (liters per capita)                                     | X        |         |         | X        |         |         |
| Physical violence by sharp object    | Male   | Education (years per capita)                                    |          |         | X       |          |         | X       |
| Physical violence by sharp object    | Male   | LDI (I\$ per capita)                                            |          |         | X       |          |         | X       |
| Physical violence by sharp object    | Male   | Opium Cultivation (binary)                                      |          | X       |         |          | X       |         |
| Physical violence by sharp object    | Male   | Population Density (over 1000 ppl/sqkm, proportion)             |          | X       |         |          | X       |         |
| Physical violence by sharp object    | Male   | Log-transformed SEV scalar: Viol Knife                          | X        |         |         | X        |         |         |
| Physical violence by sharp object    | Male   | Socio-demographic Index                                         |          |         | X       |          |         | X       |
| Physical violence by sharp object    | Female | Alcohol (liters per capita)                                     | X        |         |         | X        |         |         |
| Physical violence by sharp object    | Female | Education (years per capita)                                    |          |         | X       |          |         | X       |
| Physical violence by sharp object    | Female | LDI (I\$ per capita)                                            |          |         | X       |          |         | X       |
| Physical violence by sharp object    | Female | Opium Cultivation (binary)                                      |          | X       |         |          | X       |         |
| Physical violence by sharp object    | Female | Population Density (over 1000 ppl/sqkm, proportion)             |          | X       |         |          | X       |         |
| Physical violence by sharp object    | Female | Log-transformed SEV scalar: Viol Knife                          | X        |         |         | X        |         |         |
| Physical violence by sharp object    | Female | Socio-demographic Index                                         |          |         | X       |          |         | X       |
| Physical violence by other means     | Male   | Alcohol (liters per capita)                                     | X        |         |         | X        |         |         |
| Physical violence by other means     | Male   | Education (years per capita)                                    |          |         | X       |          |         | X       |
| Physical violence by other means     | Male   | LDI (I\$ per capita)                                            |          |         | X       |          |         | X       |
| Physical violence by other means     | Male   | Opium Cultivation (binary)                                      |          | X       |         |          | X       |         |
| Physical violence by other means     | Male   | Population Density (over 1000 ppl/sqkm, proportion)             |          | X       |         |          | X       |         |
| Physical violence by other means     | Male   | Log-transformed SEV scalar: Oth Viol                            | X        |         |         | X        |         |         |
| Physical violence by other means     | Male   | Socio-demographic Index                                         |          |         | X       |          |         | X       |
| Physical violence by other means     | Female | Alcohol (liters per capita)                                     | X        |         |         | X        |         |         |
| Physical violence by other means     | Female | Education (years per capita)                                    |          |         | X       |          |         | X       |
| Physical violence by other means     | Female | LDI (I\$ per capita)                                            |          |         | X       |          |         | X       |
| Physical violence by other means     | Female | Opium Cultivation (binary)                                      |          | X       |         |          | X       |         |
| Physical violence by other means     | Female | Population Density (over 1000 ppl/sqkm, proportion)             |          | X       |         |          | X       |         |
| Physical violence by other means     | Female | Log-transformed SEV scalar: Oth Viol                            | X        |         |         | X        |         |         |
| Physical violence by other means     | Female | Socio-demographic Index                                         |          |         | X       |          |         | X       |
| Environmental heat and cold exposure | Male   | Education (years per capita)                                    |          |         | X       |          |         | X       |
| Environmental heat and cold exposure | Male   | LDI (I\$ per capita)                                            |          |         | X       |          |         | X       |
| Environmental heat and cold exposure | Male   | Population-weighted mean temperature                            |          |         | X       |          |         | X       |
| Environmental heat and cold exposure | Male   | Elevation Over 1500m (proportion)                               |          |         | X       |          |         | X       |
| Environmental heat and cold exposure | Male   | Elevation 500 to 1500m (proportion)                             |          |         | X       |          |         | X       |
| Environmental heat and cold exposure | Male   | Population Density (150-300 ppl/sqkm, proportion)               |          |         | X       |          |         | X       |
| Environmental heat and cold exposure | Male   | Rainfall (Quintiles 4-5)                                        |          |         | X       |          |         | X       |
| Environmental heat and cold exposure | Male   | Sanitation (proportion with access)                             |          |         | X       |          |         | X       |
| Environmental heat and cold exposure | Male   | 90th percentile climatic temperature in the given country-year. |          |         | X       |          |         | X       |
| Environmental heat and cold exposure | Male   | Socio-demographic Index                                         |          |         | X       |          |         | X       |
| Environmental heat and cold exposure | Female | Education (years per capita)                                    |          |         | X       |          |         | X       |
| Environmental heat and cold exposure | Female | LDI (I\$ per capita)                                            |          |         | X       |          |         | X       |
| Environmental heat and cold exposure | Female | Population-weighted mean temperature                            |          |         | X       |          |         | X       |
| Environmental heat and cold exposure | Female | Elevation Over 1500m (proportion)                               |          |         | X       |          |         | X       |
| Environmental heat and cold exposure | Female | Elevation 500 to 1500m (proportion)                             |          |         | X       |          |         | X       |
| Environmental heat and cold exposure | Female | Population Density (150-300 ppl/sqkm, proportion)               |          |         | X       |          |         | X       |
| Environmental heat and cold exposure | Female | Rainfall (Quintiles 4-5)                                        |          |         | X       |          |         | X       |
| Environmental heat and cold exposure | Female | Sanitation (proportion with access)                             |          |         | X       |          |         | X       |
| Environmental heat and cold exposure | Female | 90th percentile climatic temperature in the given country-year. |          |         | X       |          |         | X       |
| Environmental heat and cold exposure | Female | Socio-demographic Index                                         |          |         | X       |          |         | X       |
| Acute lymphoid leukemia              | Male   | Cumulative Cigarettes (10 Years)                                | X        |         |         |          | X       |         |
| Acute lymphoid leukemia              | Male   | Socio-demographic Index                                         |          |         | X       |          |         | X       |
| Acute lymphoid leukemia              | Male   | Cumulative Cigarettes (5 Years)                                 | X        |         |         |          | X       |         |
| Acute lymphoid leukemia              | Male   | Education (years per capita)                                    |          |         | X       |          |         | X       |
| Acute lymphoid leukemia              | Male   | LDI (I\$ per capita)                                            |          |         | X       |          |         | X       |
| Acute lymphoid leukemia              | Male   | Health System Access 2 (unitless)                               |          | X       |         |          | X       |         |
| Acute lymphoid leukemia              | Male   | Log-transformed SEV scalar: Leukemia                            | X        |         |         | X        |         |         |
| Acute lymphoid leukemia              | Male   | Smoking Prevalence                                              |          | X       |         |          | X       |         |
| Acute lymphoid leukemia              | Male   | Alcohol (liters per capita)                                     |          | X       |         |          | X       |         |
| Acute lymphoid leukemia              | Female | Cumulative Cigarettes (10 Years)                                | X        |         |         |          | X       |         |



| Cause                     | Sex    | Covariate                            | GBD 2015 |         |         | GBD 2016 |         |         |
|---------------------------|--------|--------------------------------------|----------|---------|---------|----------|---------|---------|
|                           |        |                                      | Level 1  | Level 2 | Level 3 | Level 1  | Level 2 | Level 3 |
| Acute lymphoid leukemia   | Female | Socio-demographic Index              |          |         | X       |          |         | X       |
| Acute lymphoid leukemia   | Female | Cumulative Cigarettes (5 Years)      | X        |         |         |          | X       |         |
| Acute lymphoid leukemia   | Female | Education (years per capita)         |          |         | X       |          |         | X       |
| Acute lymphoid leukemia   | Female | LDI (I\$ per capita)                 |          |         | X       |          |         | X       |
| Acute lymphoid leukemia   | Female | Health System Access 2 (unitless)    | X        |         |         |          | X       |         |
| Acute lymphoid leukemia   | Female | Log-transformed SEV scalar: Leukemia | X        |         |         | X        |         |         |
| Acute lymphoid leukemia   | Female | Smoking Prevalence                   | X        |         |         |          | X       |         |
| Acute lymphoid leukemia   | Female | Alcohol (liters per capita)          |          | X       |         |          | X       |         |
| Chronic lymphoid leukemia | Female | Cumulative Cigarettes (10 Years)     | X        |         |         |          | X       |         |
| Chronic lymphoid leukemia | Female | Socio-demographic Index              |          |         | X       |          |         | X       |
| Chronic lymphoid leukemia | Female | Cumulative Cigarettes (5 Years)      | X        |         |         |          | X       |         |
| Chronic lymphoid leukemia | Female | Education (years per capita)         |          |         | X       |          |         | X       |
| Chronic lymphoid leukemia | Female | LDI (I\$ per capita)                 |          |         | X       |          |         | X       |
| Chronic lymphoid leukemia | Female | Health System Access 2 (unitless)    | X        |         |         |          | X       |         |
| Chronic lymphoid leukemia | Female | Log-transformed SEV scalar: Leukemia | X        |         |         | X        |         |         |
| Chronic lymphoid leukemia | Female | Smoking Prevalence                   | X        |         |         |          | X       |         |
| Chronic lymphoid leukemia | Female | Alcohol (liters per capita)          |          | X       |         |          | X       |         |
| Chronic lymphoid leukemia | Male   | Cumulative Cigarettes (10 Years)     | X        |         |         |          | X       |         |
| Chronic lymphoid leukemia | Male   | Socio-demographic Index              |          |         | X       |          |         | X       |
| Chronic lymphoid leukemia | Male   | Cumulative Cigarettes (5 Years)      | X        |         |         |          | X       |         |
| Chronic lymphoid leukemia | Male   | Education (years per capita)         |          |         | X       |          |         | X       |
| Chronic lymphoid leukemia | Male   | LDI (I\$ per capita)                 |          |         | X       |          |         | X       |
| Chronic lymphoid leukemia | Male   | Health System Access 2 (unitless)    | X        |         |         |          | X       |         |
| Chronic lymphoid leukemia | Male   | Log-transformed SEV scalar: Leukemia | X        |         |         | X        |         |         |
| Chronic lymphoid leukemia | Male   | Smoking Prevalence                   | X        |         |         |          | X       |         |
| Chronic lymphoid leukemia | Male   | Alcohol (liters per capita)          |          | X       |         |          | X       |         |
| Acute myeloid leukemia    | Male   | Cumulative Cigarettes (10 Years)     | X        |         |         |          | X       |         |
| Acute myeloid leukemia    | Male   | Socio-demographic Index              |          |         | X       |          |         | X       |
| Acute myeloid leukemia    | Male   | Cumulative Cigarettes (5 Years)      | X        |         |         |          | X       |         |
| Acute myeloid leukemia    | Male   | Tobacco (cigarettes per capita)      | X        |         |         |          | X       |         |
| Acute myeloid leukemia    | Male   | Education (years per capita)         |          |         | X       |          |         | X       |
| Acute myeloid leukemia    | Male   | LDI (I\$ per capita)                 |          |         | X       |          |         | X       |
| Acute myeloid leukemia    | Male   | Health System Access 2 (unitless)    | X        |         |         |          | X       |         |
| Acute myeloid leukemia    | Male   | Health System Access 2 (unitless)    | X        |         |         | X        |         |         |
| Acute myeloid leukemia    | Male   | Log-transformed SEV scalar: Leukemia | X        |         |         | X        |         |         |
| Acute myeloid leukemia    | Male   | Smoking Prevalence                   | X        |         |         |          | X       |         |
| Acute myeloid leukemia    | Male   | Alcohol (liters per capita)          |          | X       |         |          | X       |         |
| Acute myeloid leukemia    | Female | Cumulative Cigarettes (10 Years)     | X        |         |         |          | X       |         |
| Acute myeloid leukemia    | Female | Socio-demographic Index              |          |         | X       |          |         | X       |
| Acute myeloid leukemia    | Female | Cumulative Cigarettes (5 Years)      | X        |         |         |          | X       |         |
| Acute myeloid leukemia    | Female | Tobacco (cigarettes per capita)      | X        |         |         |          | X       |         |
| Acute myeloid leukemia    | Female | Education (years per capita)         |          |         | X       |          |         | X       |
| Acute myeloid leukemia    | Female | LDI (I\$ per capita)                 |          |         | X       |          |         | X       |
| Acute myeloid leukemia    | Female | Health System Access 2 (unitless)    | X        |         |         |          | X       |         |
| Acute myeloid leukemia    | Female | Log-transformed SEV scalar: Leukemia | X        |         |         | X        |         |         |
| Acute myeloid leukemia    | Female | Smoking Prevalence                   | X        |         |         |          | X       |         |
| Acute myeloid leukemia    | Female | Alcohol (liters per capita)          |          | X       |         |          | X       |         |
| Chronic myeloid leukemia  | Male   | Cumulative Cigarettes (10 Years)     | X        |         |         |          | X       |         |
| Chronic myeloid leukemia  | Male   | Socio-demographic Index              |          |         | X       |          |         | X       |
| Chronic myeloid leukemia  | Male   | Cumulative Cigarettes (5 Years)      | X        |         |         |          | X       |         |
| Chronic myeloid leukemia  | Male   | Education (years per capita)         |          |         | X       |          |         | X       |
| Chronic myeloid leukemia  | Male   | LDI (I\$ per capita)                 |          |         | X       |          |         | X       |
| Chronic myeloid leukemia  | Male   | Health System Access 2 (unitless)    | X        |         |         |          | X       |         |
| Chronic myeloid leukemia  | Male   | Smoking Prevalence                   | X        |         |         |          | X       |         |
| Chronic myeloid leukemia  | Male   | Alcohol (liters per capita)          |          | X       |         |          | X       |         |
| Chronic myeloid leukemia  | Female | Cumulative Cigarettes (10 Years)     | X        |         |         |          | X       |         |
| Chronic myeloid leukemia  | Female | Socio-demographic Index              |          |         | X       |          |         | X       |
| Chronic myeloid leukemia  | Female | Cumulative Cigarettes (5 Years)      | X        |         |         |          | X       |         |
| Chronic myeloid leukemia  | Female | Education (years per capita)         |          |         | X       |          |         | X       |
| Chronic myeloid leukemia  | Female | LDI (I\$ per capita)                 |          |         | X       |          |         | X       |
| Chronic myeloid leukemia  | Female | Health System Access 2 (unitless)    | X        |         |         |          | X       |         |
| Chronic myeloid leukemia  | Female | Smoking Prevalence                   | X        |         |         |          | X       |         |
| Chronic myeloid leukemia  | Female | Alcohol (liters per capita)          |          | X       |         |          | X       |         |

Note: Only causes modeled in CODEm are included in this table.

| Appendix Table 9. Modeling strategy for individual cause of death models in GBD 2016 |           |                                                                                                                                       |
|--------------------------------------------------------------------------------------|-----------|---------------------------------------------------------------------------------------------------------------------------------------|
| Cause name                                                                           | Level     | Model Type                                                                                                                            |
| Communicable, maternal, neonatal, and nutritional diseases                           | Aggregate |                                                                                                                                       |
| HIV/AIDS and tuberculosis                                                            | Aggregate |                                                                                                                                       |
| Tuberculosis                                                                         | 3         | CODEm                                                                                                                                 |
| Drug-sensitive tuberculosis                                                          | 4         | Spatio-temporal Gaussian process regression proportion                                                                                |
| Multidrug-resistant tuberculosis without extensive drug resistance                   | 4         | Spatio-temporal Gaussian process regression proportion                                                                                |
| Extensively drug-resistant tuberculosis                                              | 4         | Spatio-temporal Gaussian process regression proportion                                                                                |
| HIV/AIDS                                                                             | 3         | Spectrum                                                                                                                              |
| Drug-sensitive HIV/AIDS - Tuberculosis                                               | 4         | Data proportion                                                                                                                       |
| Multidrug-resistant HIV/AIDS - Tuberculosis without extensive drug resistance        | 4         | Data proportion                                                                                                                       |
| Extensively drug-resistant HIV/AIDS - Tuberculosis                                   | 4         | Data proportion                                                                                                                       |
| HIV/AIDS resulting in other diseases                                                 | 4         | Spectrum                                                                                                                              |
| Diarrhea, lower respiratory, and other common infectious diseases                    | Aggregate |                                                                                                                                       |
| Diarrheal diseases                                                                   | 3         | CODEm; Fatal discontinuity                                                                                                            |
| Intestinal infectious diseases                                                       | Aggregate |                                                                                                                                       |
| Typhoid fever                                                                        | 4         | CODEm (VR countries); natural history model (non-VR countries)                                                                        |
| Paratyphoid fever                                                                    | 4         | CODEm (VR countries); natural history model (non-VR countries)                                                                        |
| Other intestinal infectious diseases                                                 | 4         | Negative binomial regression                                                                                                          |
| Lower respiratory infections                                                         | 3         | CODEm                                                                                                                                 |
| Upper respiratory infections                                                         | 3         | Negative binomial regression                                                                                                          |
| Otitis media                                                                         | 3         | CODEm                                                                                                                                 |
| Meningitis                                                                           | 3         | CODEm                                                                                                                                 |
| Pneumococcal meningitis                                                              | 4         | DisMod MR-2.2 proportion model                                                                                                        |
| H influenzae type B meningitis                                                       | 4         | DisMod MR-2.2 proportion model                                                                                                        |
| Meningococcal meningitis                                                             | 4         | DisMod MR-2.2 proportion model; Fatal discontinuity                                                                                   |
| Other meningitis                                                                     | 4         | DisMod MR-2.2 proportion model                                                                                                        |
| Encephalitis                                                                         | 3         | CODEm                                                                                                                                 |
| Diphtheria                                                                           | 3         | Negative binomial regression                                                                                                          |
| Whooping cough                                                                       | 3         | CODEm (VR countries); natural history model (non-VR countries)                                                                        |
| Tetanus                                                                              | 3         | CODEm                                                                                                                                 |
| Measles                                                                              | 3         | Natural history model; Fatal discontinuity                                                                                            |
| Varicella and herpes zoster                                                          | 3         | Negative binomial regression                                                                                                          |
| Neglected tropical diseases and malaria                                              | Aggregate |                                                                                                                                       |
| Malaria                                                                              | 3         | CODEm (P. falciparum outside of Africa); natural history model (P. falciparum within Africa); negative binomial regression (P. vivax) |
| Chagas disease                                                                       | 3         | CODEm                                                                                                                                 |
| Leishmaniasis                                                                        | Aggregate |                                                                                                                                       |
| Visceral leishmaniasis                                                               | 4         | Natural history model                                                                                                                 |
| African trypanosomiasis                                                              | 3         | Natural history model                                                                                                                 |
| Schistosomiasis                                                                      | 3         | Negative binomial regression                                                                                                          |
| Cysticercosis                                                                        | 3         | Negative binomial regression                                                                                                          |
| Cystic echinococcosis                                                                | 3         | Negative binomial regression                                                                                                          |
| Dengue                                                                               | 3         | CODEm                                                                                                                                 |
| Yellow fever                                                                         | 3         | Natural history model; Fatal discontinuity                                                                                            |
| Rabies                                                                               | 3         | CODEm                                                                                                                                 |
| Intestinal nematode infections                                                       | Aggregate |                                                                                                                                       |
| Ascariasis                                                                           | 4         | Negative binomial regression                                                                                                          |
| Ebola                                                                                | 3         | Fatal discontinuity                                                                                                                   |
| Zika virus                                                                           | 3         | Natural history model                                                                                                                 |
| Other neglected tropical diseases                                                    | 3         | CODEm                                                                                                                                 |
| Maternal disorders                                                                   | 2         | CODEm                                                                                                                                 |
| Maternal hemorrhage                                                                  | 3         | DisMod MR-2.2 proportion model                                                                                                        |
| Maternal sepsis and other maternal infections                                        | 3         | DisMod MR-2.2 proportion model                                                                                                        |
| Maternal hypertensive disorders                                                      | 3         | DisMod MR-2.2 proportion model                                                                                                        |
| Maternal obstructed labor and uterine rupture                                        | 3         | DisMod MR-2.2 proportion model                                                                                                        |
| Maternal abortion, miscarriage, and ectopic pregnancy                                | 3         | DisMod MR-2.2 proportion model                                                                                                        |
| Indirect maternal deaths                                                             | 3         | DisMod MR-2.2 proportion model                                                                                                        |
| Late maternal deaths                                                                 | 3         | DisMod MR-2.2 proportion model                                                                                                        |
| Maternal deaths aggravated by HIV/AIDS                                               | 3         | Spectrum; DisMod MR-2.2 proportion                                                                                                    |
| Other maternal disorders                                                             | 3         | DisMod MR-2.2 proportion model                                                                                                        |
| Neonatal disorders                                                                   | 2         | CODEm                                                                                                                                 |
| Neonatal preterm birth complications                                                 | 3         | CODEm                                                                                                                                 |
| Neonatal encephalopathy due to birth asphyxia and trauma                             | 3         | CODEm                                                                                                                                 |
| Neonatal sepsis and other neonatal infections                                        | 3         | CODEm                                                                                                                                 |
| Hemolytic disease and other neonatal jaundice                                        | 3         | CODEm                                                                                                                                 |
| Other neonatal disorders                                                             | 3         | CODEm                                                                                                                                 |
| Nutritional deficiencies                                                             | 2         | CODEm                                                                                                                                 |
| Protein-energy malnutrition                                                          | 3         | CODEm; Fatal discontinuity                                                                                                            |

| Appendix Table 9. Modeling strategy for individual cause of death models in GBD 2016 |           |                                                                                    |
|--------------------------------------------------------------------------------------|-----------|------------------------------------------------------------------------------------|
| Cause name                                                                           | Level     | Model Type                                                                         |
| Iodine deficiency                                                                    | 3         | Negative binomial regression                                                       |
| Iron-deficiency anemia                                                               | 3         | CODEm                                                                              |
| Other nutritional deficiencies                                                       | 3         | CODEm                                                                              |
| Other communicable, maternal, neonatal, and nutritional diseases                     | Aggregate |                                                                                    |
| Sexually transmitted diseases excluding HIV                                          | 3         | CODEm; natural history model (congenital syphilis)                                 |
| Syphilis                                                                             | 4         | Data proportion (age/sex-specific VR); natural history model (congenital syphilis) |
| Chlamydial infection                                                                 | 4         | Data proportion (age/sex-specific VR)                                              |
| Gonococcal infection                                                                 | 4         | Data proportion (age/sex-specific VR)                                              |
| Other sexually transmitted diseases                                                  | 4         | Data proportion (age/sex-specific VR)                                              |
| Hepatitis                                                                            | 3         | CODEm                                                                              |
| Acute hepatitis A                                                                    | 4         | Natural history model                                                              |
| Hepatitis B                                                                          | 4         | Natural history model                                                              |
| Hepatitis C                                                                          | 4         | Natural history model                                                              |
| Acute hepatitis E                                                                    | 4         | Natural history model                                                              |
| Other infectious diseases                                                            | 3         | CODEm                                                                              |
| Non-communicable diseases                                                            | Aggregate |                                                                                    |
| Neoplasms                                                                            | Aggregate |                                                                                    |
| Lip and oral cavity cancer                                                           | 3         | CODEm                                                                              |
| Nasopharynx cancer                                                                   | 3         | CODEm                                                                              |
| Other pharynx cancer                                                                 | 3         | CODEm                                                                              |
| Esophageal cancer                                                                    | 3         | CODEm                                                                              |
| Stomach cancer                                                                       | 3         | CODEm                                                                              |
| Colon and rectum cancer                                                              | 3         | CODEm                                                                              |
| Liver cancer                                                                         | 3         | CODEm                                                                              |
| Liver cancer due to hepatitis B                                                      | 4         | DisMod MR-2.2 proportion model                                                     |
| Liver cancer due to hepatitis C                                                      | 4         | DisMod MR-2.2 proportion model                                                     |
| Liver cancer due to alcohol use                                                      | 4         | DisMod MR-2.2 proportion model                                                     |
| Liver cancer due to other causes                                                     | 4         | DisMod MR-2.2 proportion model                                                     |
| Gallbladder and biliary tract cancer                                                 | 3         | CODEm                                                                              |
| Pancreatic cancer                                                                    | 3         | CODEm                                                                              |
| Larynx cancer                                                                        | 3         | CODEm                                                                              |
| Tracheal, bronchus, and lung cancer                                                  | 3         | CODEm                                                                              |
| Malignant skin melanoma                                                              | 3         | CODEm                                                                              |
| Non-melanoma skin cancer                                                             | Aggregate |                                                                                    |
| Non-melanoma skin cancer (squamous-cell carcinoma)                                   | 4         | CODEm                                                                              |
| Breast cancer                                                                        | 3         | CODEm                                                                              |
| Cervical cancer                                                                      | 3         | CODEm                                                                              |
| Uterine cancer                                                                       | 3         | CODEm                                                                              |
| Ovarian cancer                                                                       | 3         | CODEm                                                                              |
| Prostate cancer                                                                      | 3         | CODEm                                                                              |
| Testicular cancer                                                                    | 3         | CODEm                                                                              |
| Kidney cancer                                                                        | 3         | CODEm                                                                              |
| Bladder cancer                                                                       | 3         | CODEm                                                                              |
| Brain and nervous system cancer                                                      | 3         | CODEm                                                                              |
| Thyroid cancer                                                                       | 3         | CODEm                                                                              |
| Mesothelioma                                                                         | 3         | CODEm                                                                              |
| Hodgkin lymphoma                                                                     | 3         | CODEm                                                                              |
| Non-Hodgkin lymphoma                                                                 | 3         | CODEm                                                                              |
| Multiple myeloma                                                                     | 3         | CODEm                                                                              |
| Leukemia                                                                             | 3         | CODEm                                                                              |
| Acute lymphoid leukemia                                                              | 4         | CODEm                                                                              |
| Chronic lymphoid leukemia                                                            | 4         | CODEm                                                                              |
| Acute myeloid leukemia                                                               | 4         | CODEm                                                                              |
| Chronic myeloid leukemia                                                             | 4         | CODEm                                                                              |
| Other leukemia                                                                       | 4         | CODEm                                                                              |
| Other neoplasms                                                                      | 3         | CODEm                                                                              |
| Cardiovascular diseases                                                              | 2         | CODEm                                                                              |
| Rheumatic heart disease                                                              | 3         | CODEm                                                                              |
| Ischemic heart disease                                                               | 3         | CODEm                                                                              |
| Cerebrovascular disease                                                              | 3         | CODEm                                                                              |
| Ischemic stroke                                                                      | 4         | CODEm                                                                              |
| Hemorrhagic stroke                                                                   | 4         | CODEm                                                                              |
| Hypertensive heart disease                                                           | 3         | CODEm                                                                              |
| Cardiomyopathy and myocarditis                                                       | 3         | CODEm                                                                              |
| Myocarditis                                                                          | 4         | CODEm                                                                              |
| Alcoholic cardiomyopathy                                                             | 4         | CODEm                                                                              |
| Other cardiomyopathy                                                                 | 4         | CODEm                                                                              |
| Atrial fibrillation and flutter                                                      | 3         | DisMod-MR 2.2 prevalence-based model                                               |
| Aortic aneurysm                                                                      | 3         | CODEm                                                                              |
| Peripheral artery disease                                                            | 3         | CODEm                                                                              |

| Appendix Table 9. Modeling strategy for individual cause of death models in GBD 2016 |           |                                               |
|--------------------------------------------------------------------------------------|-----------|-----------------------------------------------|
| Cause name                                                                           | Level     | Model Type                                    |
| Endocarditis                                                                         | 3         | CODEm                                         |
| Other cardiovascular and circulatory diseases                                        | 3         | CODEm                                         |
| Chronic respiratory diseases                                                         | 2         | CODEm                                         |
| Chronic obstructive pulmonary disease                                                | 3         | CODEm                                         |
| Pneumoconiosis                                                                       | 3         | CODEm                                         |
| Silicosis                                                                            | 4         | CODEm                                         |
| Asbestosis                                                                           | 4         | CODEm                                         |
| Coal workers pneumoconiosis                                                          | 4         | CODEm                                         |
| Other pneumoconiosis                                                                 | 4         | CODEm                                         |
| Asthma                                                                               | 3         | CODEm                                         |
| Interstitial lung disease and pulmonary sarcoidosis                                  | 3         | CODEm                                         |
| Other chronic respiratory diseases                                                   | 3         | CODEm                                         |
| Cirrhosis and other chronic liver diseases                                           | 2         | CODEm                                         |
| Cirrhosis and other chronic liver diseases due to hepatitis B                        | 3         | DisMod MR-2.2 proportion model                |
| Cirrhosis and other chronic liver diseases due to hepatitis C                        | 3         | DisMod MR-2.2 proportion model                |
| Cirrhosis and other chronic liver diseases due to alcohol use                        | 3         | DisMod MR-2.2 proportion model                |
| Cirrhosis and other chronic liver diseases due to other causes                       | 3         | DisMod MR-2.2 proportion model                |
| Digestive diseases                                                                   | 2         | CODEm                                         |
| Peptic ulcer disease                                                                 | 3         | CODEm                                         |
| Gastritis and duodenitis                                                             | 3         | CODEm                                         |
| Appendicitis                                                                         | 3         | CODEm                                         |
| Paralytic ileus and intestinal obstruction                                           | 3         | CODEm                                         |
| Inguinal, femoral, and abdominal hernia                                              | 3         | CODEm                                         |
| Inflammatory bowel disease                                                           | 3         | CODEm                                         |
| Vascular intestinal disorders                                                        | 3         | CODEm                                         |
| Gallbladder and biliary diseases                                                     | 3         | CODEm                                         |
| Pancreatitis                                                                         | 3         | CODEm                                         |
| Other digestive diseases                                                             | 3         | CODEm                                         |
| Neurological disorders                                                               | Aggregate |                                               |
| Alzheimer disease and other dementias                                                | 3         | DisMod-MR 2.2 prevalence-based model          |
| Parkinson disease                                                                    | 3         | DisMod-MR 2.2 prevalence-based model          |
| Epilepsy                                                                             | 3         | CODEm                                         |
| Multiple sclerosis                                                                   | 3         | CODEm                                         |
| Motor neuron disease                                                                 | 3         | CODEm                                         |
| Other neurological disorders                                                         | 3         | CODEm                                         |
| Mental and substance use disorders                                                   | Aggregate |                                               |
| Alcohol use disorders                                                                | 3         | CODEm                                         |
| Drug use disorders                                                                   | 3         | CODEm                                         |
| Opioid use disorders                                                                 | 4         | CODEm                                         |
| Cocaine use disorders                                                                | 4         | CODEm                                         |
| Amphetamine use disorders                                                            | 4         | CODEm                                         |
| Other drug use disorders                                                             | 4         | CODEm                                         |
| Eating disorders                                                                     | Aggregate |                                               |
| Anorexia nervosa                                                                     | 4         | CODEm                                         |
| Bulimia nervosa                                                                      | 4         | CODEm                                         |
| Diabetes, urogenital, blood, and endocrine diseases                                  | Aggregate |                                               |
| Diabetes mellitus                                                                    | 3         | CODEm                                         |
| Acute glomerulonephritis                                                             | 3         | CODEm                                         |
| Chronic kidney disease                                                               | 3         | CODEm                                         |
| Chronic kidney disease due to diabetes mellitus                                      | 4         | DisMod MR-2.2 proportion model                |
| Chronic kidney disease due to hypertension                                           | 4         | DisMod MR-2.2 proportion model                |
| Chronic kidney disease due to glomerulonephritis                                     | 4         | DisMod MR-2.2 proportion model                |
| Chronic kidney disease due to other causes                                           | 4         | DisMod MR-2.2 proportion model                |
| Urinary diseases and male infertility                                                | 3         | CODEm                                         |
| Interstitial nephritis and urinary tract infections                                  | 4         | CODEm                                         |
| Urolithiasis                                                                         | 4         | CODEm                                         |
| Other urinary diseases                                                               | 4         | CODEm                                         |
| Gynecological diseases                                                               | 3         | CODEm                                         |
| Uterine fibroids                                                                     | 4         | CODEm                                         |
| Polycystic ovarian syndrome                                                          | 4         | CODEm                                         |
| Endometriosis                                                                        | 4         | CODEm                                         |
| Genital prolapse                                                                     | 4         | CODEm                                         |
| Other gynecological diseases                                                         | 4         | CODEm                                         |
| Hemoglobinopathies and hemolytic anemias                                             | 3         | CODEm                                         |
| Thalassemias                                                                         | 4         | DisMod MR-2.2 cause-specific mortality model  |
| Sickle cell disorders                                                                | 4         | DisMod MR-2.2 cause-specific mortality model  |
| G6PD deficiency                                                                      | 4         | DisMod MR-2.2 cause-specific mortality model  |
| Other hemoglobinopathies and hemolytic anemias                                       | 4         | Data proportion (age-specific high-income VR) |
| Endocrine, metabolic, blood, and immune disorders                                    | 3         | CODEm                                         |
| Musculoskeletal disorders                                                            | 2         | CODEm                                         |
| Rheumatoid arthritis                                                                 | 3         | CODEm                                         |

| Appendix Table 9. Modeling strategy for individual cause of death models in GBD 2016 |           |                            |
|--------------------------------------------------------------------------------------|-----------|----------------------------|
| Cause name                                                                           | Level     | Model Type                 |
| Other musculoskeletal disorders                                                      | 3         | CODEm                      |
| Other non-communicable diseases                                                      | Aggregate |                            |
| Congenital birth defects                                                             | 3         | CODEm                      |
| Neural tube defects                                                                  | 4         | CODEm                      |
| Congenital heart anomalies                                                           | 4         | CODEm                      |
| Cleft lip and cleft palate                                                           | 4         | CODEm                      |
| Down syndrome                                                                        | 4         | CODEm                      |
| Other chromosomal abnormalities                                                      | 4         | CODEm                      |
| Congenital musculoskeletal and limb anomalies                                        | 4         | CODEm                      |
| Urogenital congenital anomalies                                                      | 4         | CODEm                      |
| Digestive congenital anomalies                                                       | 4         | CODEm                      |
| Other congenital birth defects                                                       | 4         | CODEm                      |
| Skin and subcutaneous diseases                                                       | 3         | CODEm                      |
| Cellulitis                                                                           | 4         | CODEm                      |
| Pyoderma                                                                             | 4         | CODEm                      |
| Decubitus ulcer                                                                      | 4         | CODEm                      |
| Other skin and subcutaneous diseases                                                 | 4         | CODEm                      |
| Sudden infant death syndrome                                                         | 3         | CODEm                      |
| Injuries                                                                             | Aggregate |                            |
| Transport injuries                                                                   | 2         | CODEm                      |
| Road injuries                                                                        | 3         | CODEm                      |
| Pedestrian road injuries                                                             | 4         | CODEm                      |
| Cyclist road injuries                                                                | 4         | CODEm                      |
| Motorcyclist road injuries                                                           | 4         | CODEm                      |
| Motor vehicle road injuries                                                          | 4         | CODEm; Fatal discontinuity |
| Other road injuries                                                                  | 4         | CODEm                      |
| Other transport injuries                                                             | 3         | CODEm; Fatal discontinuity |
| Unintentional injuries                                                               | Aggregate |                            |
| Falls                                                                                | 3         | CODEm                      |
| Drowning                                                                             | 3         | CODEm                      |
| Fire, heat, and hot substances                                                       | 3         | CODEm; Fatal discontinuity |
| Poisonings                                                                           | 3         | CODEm; Fatal discontinuity |
| Exposure to mechanical forces                                                        | Aggregate |                            |
| Unintentional firearm injuries                                                       | 4         | CODEm                      |
| Unintentional suffocation                                                            | 4         | CODEm                      |
| Other exposure to mechanical forces                                                  | 4         | CODEm; Fatal discontinuity |
| Adverse effects of medical treatment                                                 | 3         | CODEm                      |
| Animal contact                                                                       | 3         | CODEm                      |
| Venomous animal contact                                                              | 4         | CODEm                      |
| Non-venomous animal contact                                                          | 4         | CODEm                      |
| Foreign body                                                                         | Aggregate |                            |
| Pulmonary aspiration and foreign body in airway                                      | 4         | CODEm                      |
| Foreign body in other body part                                                      | 4         | CODEm                      |
| Environmental heat and cold exposure                                                 | 3         | CODEm; Fatal discontinuity |
| Other unintentional injuries                                                         | 3         | CODEm                      |
| Self-harm and interpersonal violence                                                 | Aggregate |                            |
| Self-harm                                                                            | 3         | CODEm                      |
| Self-harm by firearm                                                                 | 4         | CODEm                      |
| Self-harm by other specified means                                                   | 4         | CODEm                      |
| Interpersonal violence                                                               | 3         | CODEm                      |
| Physical violence by firearm                                                         | 4         | CODEm                      |
| Physical violence by sharp object                                                    | 4         | CODEm                      |
| Physical violence by other means                                                     | 4         | CODEm                      |
| Forces of nature, conflict and terrorism, and executions and police conflict         | Aggregate |                            |
| Exposure to forces of nature                                                         | 3         | Fatal discontinuity        |
| Conflict and terrorism                                                               | 3         | Fatal discontinuity        |
| Executions and police conflict                                                       | 3         | CODEm; Fatal discontinuity |

**Appendix Table 10: CoDCorrect cause hierarchy with levels**

| Cause name                                                         | CoDCorrect level |
|--------------------------------------------------------------------|------------------|
| All causes                                                         | 0                |
| Tuberculosis                                                       | 1                |
| Drug-sensitive tuberculosis                                        | 2                |
| Multidrug-resistant tuberculosis without extensive drug resistance | 2                |
| Extensively drug-resistant tuberculosis                            | 2                |
| Diarrhoeal diseases                                                | 1                |
| Typhoid fever                                                      | 1                |
| Paratyphoid fever                                                  | 1                |
| Other intestinal infectious diseases                               | 1                |
| Lower respiratory infections                                       | 1                |
| Upper respiratory infections                                       | 1                |
| Otitis media                                                       | 1                |
| Meningitis                                                         | 1                |
| Pneumococcal meningitis                                            | 2                |
| H influenzae type B meningitis                                     | 2                |
| Meningococcal infection                                            | 2                |
| Other meningitis                                                   | 2                |
| Encephalitis                                                       | 1                |
| Diphtheria                                                         | 1                |
| Whooping cough                                                     | 1                |
| Tetanus                                                            | 1                |
| Measles                                                            | 1                |
| Varicella and herpes zoster                                        | 1                |
| Malaria                                                            | 1                |
| Chagas disease                                                     | 1                |
| Visceral leishmaniasis                                             | 1                |
| African trypanosomiasis                                            | 1                |
| Schistosomiasis                                                    | 1                |
| Cysticercosis                                                      | 1                |
| Cystic echinococcosis                                              | 1                |
| Dengue                                                             | 1                |
| Yellow fever                                                       | 1                |
| Rabies                                                             | 1                |
| Intestinal nematode infections                                     | 1                |
| Ascariasis                                                         | 2                |
| Zika virus                                                         | 1                |
| Other neglected tropical diseases                                  | 1                |
| Maternal disorders                                                 | 1                |
| Maternal haemorrhage                                               | 2                |
| Maternal sepsis and other pregnancy related infections             | 2                |
| Maternal hypertensive disorders                                    | 2                |
| Maternal obstructed labour and uterine rupture                     | 2                |
| Maternal abortion, miscarriage, and ectopic pregnancy              | 2                |

**Appendix Table 10: CoDCorrect cause hierarchy with levels**

| Cause name                                               | CoDCorrect level |
|----------------------------------------------------------|------------------|
| Indirect maternal deaths                                 | 2                |
| Late maternal deaths                                     | 2                |
| Maternal deaths aggravated by HIV/AIDS                   | 2                |
| Other maternal disorders                                 | 2                |
| Neonatal disorders                                       | 1                |
| Neonatal preterm birth complications                     | 2                |
| Neonatal encephalopathy due to birth asphyxia and trauma | 2                |
| Neonatal sepsis and other neonatal infections            | 2                |
| Hemolytic disease and other neonatal jaundice            | 2                |
| Other neonatal disorders                                 | 2                |
| Nutritional deficiencies                                 | 1                |
| Protein-energy malnutrition                              | 2                |
| Iodine deficiency                                        | 2                |
| Iron-deficiency anaemia                                  | 2                |
| Other nutritional deficiencies                           | 2                |
| Sexually transmitted diseases excluding HIV              | 1                |
| Syphilis                                                 | 2                |
| Chlamydial infection                                     | 2                |
| Gonococcal infection                                     | 2                |
| Other sexually transmitted diseases                      | 2                |
| Hepatitis                                                | 1                |
| Acute hepatitis A                                        | 2                |
| Hepatitis B                                              | 2                |
| Hepatitis C                                              | 2                |
| Acute hepatitis E                                        | 2                |
| Other infectious diseases                                | 1                |
| Lip and oral cavity cancer                               | 1                |
| Nasopharynx cancer                                       | 1                |
| Other pharynx cancer                                     | 1                |
| Oesophageal cancer                                       | 1                |
| Stomach cancer                                           | 1                |
| Colon and rectum cancer                                  | 1                |
| Liver cancer                                             | 1                |
| Liver cancer due to hepatitis B                          | 2                |
| Liver cancer due to hepatitis C                          | 2                |
| Liver cancer due to alcohol use                          | 2                |
| Liver cancer due to other causes                         | 2                |
| Gallbladder and biliary tract cancer                     | 1                |
| Pancreatic cancer                                        | 1                |
| Larynx cancer                                            | 1                |
| Tracheal, bronchus, and lung cancer                      | 1                |
| Malignant skin melanoma                                  | 1                |

**Appendix Table 10: CoDCorrect cause hierarchy with levels**

| Cause name                                         | CoDCorrect level |
|----------------------------------------------------|------------------|
| Non-melanoma skin cancer                           | 1                |
| Non-melanoma skin cancer (squamous-cell carcinoma) | 2                |
| Breast cancer                                      | 1                |
| Cervical cancer                                    | 1                |
| Uterine cancer                                     | 1                |
| Ovarian cancer                                     | 1                |
| Prostate cancer                                    | 1                |
| Testicular cancer                                  | 1                |
| Kidney cancer                                      | 1                |
| Bladder cancer                                     | 1                |
| Brain and nervous system cancer                    | 1                |
| Thyroid cancer                                     | 1                |
| Mesothelioma                                       | 1                |
| Hodgkin lymphoma                                   | 1                |
| Non-Hodgkin's lymphoma                             | 1                |
| Multiple myeloma                                   | 1                |
| Leukaemia                                          | 1                |
| Acute lymphoid leukaemia                           | 2                |
| Chronic lymphoid leukaemia                         | 2                |
| Acute myeloid leukaemia                            | 2                |
| Chronic myeloid leukaemia                          | 2                |
| Other leukaemia                                    | 2                |
| Other neoplasms                                    | 1                |
| Cardiovascular diseases                            | 1                |
| Rheumatic heart disease                            | 2                |
| Ischaemic heart disease                            | 2                |
| Cerebrovascular disease                            | 2                |
| Ischaemic stroke                                   | 3                |
| Hemorrhagic stroke                                 | 3                |
| Hypertensive heart disease                         | 2                |
| Cardiomyopathy and myocarditis                     | 2                |
| Myocarditis                                        | 3                |
| Alcoholic cardiomyopathy                           | 3                |
| Other cardiomyopathy                               | 3                |
| Atrial fibrillation and flutter                    | 2                |
| Aortic aneurysm                                    | 2                |
| Peripheral vascular disease                        | 2                |
| Endocarditis                                       | 2                |
| Other cardiovascular and circulatory diseases      | 2                |
| Chronic respiratory diseases                       | 1                |
| Chronic obstructive pulmonary disease              | 2                |
| Pneumoconiosis                                     | 2                |
| Silicosis                                          | 3                |
| Asbestosis                                         | 3                |



**Appendix Table 10: CoDCorrect cause hierarchy with levels**

| Cause name                                                     | CoDCorrect level |
|----------------------------------------------------------------|------------------|
| Coal workers pneumoconiosis                                    | 3                |
| Other pneumoconiosis                                           | 3                |
| Asthma                                                         | 2                |
| Interstitial lung disease and pulmonary sarcoidosis            | 2                |
| Other chronic respiratory diseases                             | 2                |
| Cirrhosis and other chronic liver diseases                     | 1                |
| Cirrhosis and other chronic liver diseases due to hepatitis B  | 2                |
| Cirrhosis and other chronic liver diseases due to hepatitis C  | 2                |
| Cirrhosis and other chronic liver diseases due to alcohol use  | 2                |
| Cirrhosis and other chronic liver diseases due to other causes | 2                |
| Digestive diseases                                             | 1                |
| Peptic ulcer disease                                           | 2                |
| Gastritis and duodenitis                                       | 2                |
| Appendicitis                                                   | 2                |
| Paralytic ileus and intestinal obstruction                     | 2                |
| Inguinal, femoral, and abdominal hernia                        | 2                |
| Inflammatory bowel disease                                     | 2                |
| Vascular intestinal disorders                                  | 2                |
| Gallbladder and biliary diseases                               | 2                |
| Pancreatitis                                                   | 2                |
| Other digestive diseases                                       | 2                |
| Alzheimer's disease and other dementias                        | 1                |
| Parkinson's disease                                            | 1                |
| Epilepsy                                                       | 1                |
| Multiple sclerosis                                             | 1                |
| Motor neuron disease                                           | 1                |
| Other neurological disorders                                   | 1                |
| Alcohol use disorders                                          | 1                |
| Drug use disorders                                             | 1                |
| Opioid use disorders                                           | 2                |
| Cocaine use disorders                                          | 2                |
| Amphetamine use disorders                                      | 2                |
| Other drug use disorders                                       | 2                |
| Eating disorders                                               | 1                |
| Anorexia nervosa                                               | 2                |
| Bulimia nervosa                                                | 2                |
| Diabetes mellitus                                              | 1                |
| Acute glomerulonephritis                                       | 1                |
| Chronic kidney disease                                         | 1                |
| Chronic kidney disease due to diabetes mellitus                | 2                |
| Chronic kidney disease due to hypertension                     | 2                |

**Appendix Table 10: CoDCorrect cause hierarchy with levels**

| Cause name                                          | CoDCorrect level |
|-----------------------------------------------------|------------------|
| Chronic kidney disease due to glomerulonephritis    | 2                |
| Chronic kidney disease due to other causes          | 2                |
| Urinary diseases and male infertility               | 1                |
| Interstitial nephritis and urinary tract infections | 2                |
| Urolithiasis                                        | 2                |
| Other urinary diseases                              | 2                |
| Gynecological diseases                              | 1                |
| Uterine fibroids                                    | 2                |
| Polycystic ovarian syndrome                         | 2                |
| Endometriosis                                       | 2                |
| Genital prolapse                                    | 2                |
| Other gynecological diseases                        | 2                |
| Hemoglobinopathies and hemolytic anaemias           | 1                |
| Thalasseмии                                         | 2                |
| Sickle cell disorders                               | 2                |
| G6PD deficiency                                     | 2                |
| Other hemoglobinopathies and hemolytic anaemias     | 2                |
| Endocrine, metabolic, blood, and immune disorders   | 1                |
| Musculoskeletal disorders                           | 1                |
| Rheumatoid arthritis                                | 2                |
| Other musculoskeletal disorders                     | 2                |
| Congenital anomalies                                | 1                |
| Neural tube defects                                 | 2                |
| Congenital heart anomalies                          | 2                |
| Cleft lip and cleft palate                          | 2                |
| Down's syndrome                                     | 2                |
| Other chromosomal abnormalities                     | 2                |
| Congenital musculoskeletal and limb anomalies       | 2                |
| Urogenital congenital anomalies                     | 2                |
| Digestive congenital anomalies                      | 2                |
| Other congenital anomalies                          | 2                |
| Skin and subcutaneous diseases                      | 1                |
| Cellulitis                                          | 2                |
| Pyoderma                                            | 2                |
| Decubitus ulcer                                     | 2                |
| Other skin and subcutaneous diseases                | 2                |
| Sudden infant death syndrome                        | 1                |
| Transport injuries                                  | 1                |
| Road injuries                                       | 2                |
| Pedestrian road injuries                            | 3                |
| Cyclist road injuries                               | 3                |

**Appendix Table 10: CoDCorrect cause hierarchy with levels**

| Cause name                                      | CoDCorrect level |
|-------------------------------------------------|------------------|
| Motorcyclist road injuries                      | 3                |
| Motor vehicle road injuries                     | 3                |
| Other road injuries                             | 3                |
| Other transport injuries                        | 2                |
| Falls                                           | 1                |
| Drowning                                        | 1                |
| Fire, heat, and hot substances                  | 1                |
| Poisonings                                      | 1                |
| Unintentional firearm injuries                  | 1                |
| Unintentional suffocation                       | 1                |
| Other exposure to mechanical forces             | 1                |
| Adverse effects of medical treatment            | 1                |
| Animal contact                                  | 1                |
| Venomous animal contact                         | 2                |
| Non-venomous animal contact                     | 2                |
| Pulmonary aspiration and foreign body in airway | 1                |
| Foreign body in other body part                 | 1                |
| Environmental heat and cold exposure            | 1                |
| Other unintentional injuries                    | 1                |
| Self-harm                                       | 1                |
| Self-harm by firearm                            | 2                |
| Self-harm by other specified means              | 2                |
| Interpersonal violence                          | 1                |
| Assault by firearm                              | 2                |
| Assault by sharp object                         | 2                |
| Assault by other means                          | 2                |
| Executions and police conflict                  | 1                |

**Appendix Table 11: Percent change before and after CoDCorrect by cause for all ages, both sexes combined, 2016**

| Cause                                                                         | CoDCorrect level | Percent change           |
|-------------------------------------------------------------------------------|------------------|--------------------------|
| All causes                                                                    | 0                | 1.24<br>-0.59 to 3.44    |
| Communicable, maternal, neonatal, and nutritional disorders                   | 1                | 12.01<br>7.0 to 17.26    |
| HIV/AIDS and tuberculosis                                                     | 2                | 97.47<br>90.68 to 103.98 |
| Tuberculosis                                                                  | 3                | 6.59<br>3.09 to 10.26    |
| Diarrhoea, lower respiratory infections, and other common infectious diseases | 2                | 0.67<br>-4.43 to 5.69    |
| Diarrhoeal diseases                                                           | 3                | -0.47<br>-8.62 to 5.96   |
| Intestinal infectious diseases                                                | 3                | 2.45<br>-14.1 to 22.69   |
| Typhoid fever                                                                 | 4                | 4.33<br>-14.95 to 29.31  |
| Paratyphoid fever                                                             | 4                | -7.73<br>-14.56 to 1.66  |
| Other intestinal infectious diseases                                          | 4                | 8.49<br>-1.73 to 18.6    |
| Lower respiratory infections                                                  | 3                | 1.12<br>-1.84 to 4.69    |
| Upper respiratory infections                                                  | 3                | 5.74<br>0.79 to 11.28    |
| Otitis media                                                                  | 3                | 3.7<br>-1.94 to 9.49     |
| Meningitis                                                                    | 3                | 4.76<br>-2.07 to 11.37   |
| Pneumococcal meningitis                                                       | 4                | 5.33<br>-0.72 to 11.34   |
| H influenzae type B meningitis                                                | 4                | 3.12<br>-4.15 to 10.68   |
| Meningococcal infection                                                       | 4                | 3.47<br>-3.4 to 10.11    |
| Other meningitis                                                              | 4                | 4.47<br>-2.56 to 11.23   |
| Encephalitis                                                                  | 3                | 0.51<br>-3.85 to 5.62    |
| Diphtheria                                                                    | 3                | 3.57<br>-6.87 to 14.4    |
| Whooping cough                                                                | 3                | -1.17<br>-11.87 to 11.21 |
| Tetanus                                                                       | 3                | -3.43<br>-15.37 to 4.25  |
| Measles                                                                       | 3                | -5.12<br>-13.92 to 7.18  |
| Varicella and herpes zoster                                                   | 3                | 1.35<br>-3.25 to 7.28    |
| Neglected tropical diseases and malaria                                       | 2                | -0.48<br>-10.0 to 9.51   |
| Malaria                                                                       | 3                | -0.98<br>-11.49 to 10.06 |
| Chagas disease                                                                | 3                | -3.74<br>-5.03 to -2.44  |
| Leishmaniasis                                                                 | 3                | 2.24<br>-2.83 to 8.43    |
| Visceral leishmaniasis                                                        | 4                | 2.24<br>-2.83 to 8.43    |
| African trypanosomiasis                                                       | 3                | 2.26<br>-8.39 to 12.17   |

**Appendix Table 11: Percent change before and after CoDCorrect by cause for all ages, both sexes combined, 2016**

| Cause                                                            | CoDCorrect level | Percent change          |
|------------------------------------------------------------------|------------------|-------------------------|
| Schistosomiasis                                                  | 3                | 15.38<br>10.99 to 20.91 |
| Cysticercosis                                                    | 3                | 9.05<br>5.86 to 13.07   |
| Cystic echinococcosis                                            | 3                | 7.91<br>3.46 to 12.56   |
| Dengue                                                           | 3                | -1.4<br>-5.86 to 4.64   |
| Yellow fever                                                     | 3                | 9.26<br>2.12 to 19.52   |
| Rabies                                                           | 3                | 2.69<br>-3.02 to 9.28   |
| Intestinal nematode infections                                   | 3                | 0.21<br>-9.92 to 11.06  |
| Ascariasis                                                       | 4                | 0.28<br>-9.86 to 11.13  |
| Other neglected tropical diseases                                | 3                | 4.44<br>-3.47 to 13.69  |
| Maternal disorders                                               | 2                | 0.71<br>-4.52 to 6.1    |
| Maternal haemorrhage                                             | 3                | 2.85<br>-2.2 to 8.08    |
| Maternal sepsis and other pregnancy related infections           | 3                | 0.65<br>-4.94 to 6.38   |
| Maternal hypertensive disorders                                  | 3                | -2.07<br>-7.34 to 3.46  |
| Maternal obstructed labour and uterine rupture                   | 3                | 0.46<br>-5.98 to 6.91   |
| Maternal abortion, miscarriage, and ectopic pregnancy            | 3                | 2.1<br>-3.78 to 7.98    |
| Indirect maternal deaths                                         | 3                | -2.51<br>-8.21 to 3.33  |
| Late maternal deaths                                             | 3                | -0.29<br>-5.3 to 4.89   |
| Other maternal disorders                                         | 3                | 2.06<br>-2.74 to 7.14   |
| Neonatal disorders                                               | 2                | -0.93<br>-4.01 to 3.55  |
| Neonatal preterm birth complications                             | 3                | 2.85<br>-3.38 to 15.72  |
| Neonatal encephalopathy due to birth asphyxia and trauma         | 3                | 3.41<br>-4.18 to 16.19  |
| Neonatal sepsis and other neonatal infections                    | 3                | 0.26<br>-26.78 to 45.09 |
| Hemolytic disease and other neonatal jaundice                    | 3                | 2.77<br>-13.17 to 21.9  |
| Other neonatal disorders                                         | 3                | -0.55<br>-7.66 to 9.68  |
| Nutritional deficiencies                                         | 2                | 2.07<br>-3.89 to 8.51   |
| Protein-energy malnutrition                                      | 3                | 25.43<br>-1.87 to 47.63 |
| Iodine deficiency                                                | 3                | 17.9<br>-5.86 to 48.32  |
| Iron-deficiency anaemia                                          | 3                | -7.65<br>-35.12 to 44.0 |
| Other nutritional deficiencies                                   | 3                | 60.06<br>42.46 to 85.86 |
| Other communicable, maternal, neonatal, and nutritional diseases | 2                | 1.04<br>-3.8 to 7.19    |

**Appendix Table 11: Percent change before and after CoDCorrect by cause for all ages, both sexes combined, 2016**

| Cause                                       | CoDCorrect level | Percent change             |
|---------------------------------------------|------------------|----------------------------|
| Sexually transmitted diseases excluding HIV | 3                | 1.19<br>-5.21 to 9.34      |
| Syphilis                                    | 4                | 1.01<br>-5.63 to 9.59      |
| Chlamydial infection                        | 4                | 4.25<br>-0.9 to 8.55       |
| Gonococcal infection                        | 4                | 4.5<br>-0.61 to 8.46       |
| Other sexually transmitted diseases         | 4                | 5.01<br>-0.01 to 9.15      |
| Hepatitis                                   | 3                | 3.59<br>0.31 to 7.54       |
| Acute hepatitis A                           | 4                | 30.6<br>-10.34 to 154.39   |
| Hepatitis B                                 | 4                | -43.25<br>-56.36 to -25.25 |
| Hepatitis C                                 | 4                | 55.64<br>17.54 to 114.95   |
| Acute hepatitis E                           | 4                | 42.07<br>7.36 to 98.28     |
| Other infectious diseases                   | 3                | -3.01<br>-10.28 to 5.6     |
| Non-communicable diseases                   | 1                | -1.81<br>-3.24 to -0.17    |
| Neoplasms                                   | 2                | -1.19<br>-2.61 to 0.59     |
| Oesophageal cancer                          | 3                | -1.39<br>-2.6 to 0.19      |
| Stomach cancer                              | 3                | -1.88<br>-3.12 to -0.25    |
| Liver cancer                                | 3                | -1.2<br>-2.69 to 1.12      |
| Liver cancer due to hepatitis B             | 4                | -0.59<br>-2.21 to 2.08     |
| Liver cancer due to hepatitis C             | 4                | -2.59<br>-3.98 to -0.86    |
| Liver cancer due to alcohol use             | 4                | -1.87<br>-3.7 to 0.33      |
| Liver cancer due to other causes            | 4                | -0.65<br>-2.07 to 1.69     |
| Larynx cancer                               | 3                | -0.77<br>-2.33 to 1.03     |
| Tracheal, bronchus, and lung cancer         | 3                | -2.23<br>-3.42 to -0.62    |
| Breast cancer                               | 3                | -0.37<br>-2.34 to 1.76     |
| Cervical cancer                             | 3                | 3.5<br>0.72 to 6.15        |
| Uterine cancer                              | 3                | 0.05<br>-2.11 to 1.94      |
| Prostate cancer                             | 3                | -0.98<br>-2.71 to 0.95     |
| Colon and rectum cancer                     | 3                | -1.95<br>-3.4 to -0.16     |
| Lip and oral cavity cancer                  | 3                | -0.39<br>-2.3 to 1.54      |
| Nasopharynx cancer                          | 3                | 0.26<br>-1.36 to 3.21      |
| Other pharynx cancer                        | 3                | 0.94<br>-1.74 to 2.85      |

**Appendix Table 11: Percent change before and after CoDCorrect by cause for all ages, both sexes combined, 2016**

| Cause                                         | CoDCorrect level | Percent change             |
|-----------------------------------------------|------------------|----------------------------|
| Gallbladder and biliary tract cancer          | 3                | -2.65<br>-4.45 to -0.79    |
| Pancreatic cancer                             | 3                | -2.11<br>-3.57 to -0.34    |
| Malignant skin melanoma                       | 3                | -0.7<br>-2.07 to 0.99      |
| Non-melanoma skin cancer                      | 3                | -1.85<br>-3.14 to -0.14    |
| Ovarian cancer                                | 3                | -0.37<br>-2.32 to 1.5      |
| Testicular cancer                             | 3                | 4.01<br>1.79 to 7.54       |
| Kidney cancer                                 | 3                | -1.83<br>-3.18 to -0.23    |
| Bladder cancer                                | 3                | -2.19<br>-3.56 to -0.52    |
| Brain and nervous system cancer               | 3                | -0.24<br>-1.96 to 2.3      |
| Thyroid cancer                                | 3                | 0.67<br>-1.23 to 2.44      |
| Mesothelioma                                  | 3                | -1.14<br>-2.49 to 0.61     |
| Hodgkin lymphoma                              | 3                | 2.55<br>0.15 to 5.06       |
| Non-Hodgkin's lymphoma                        | 3                | -0.01<br>-1.7 to 1.88      |
| Multiple myeloma                              | 3                | -1.25<br>-2.68 to 0.36     |
| Leukaemia                                     | 3                | -0.42<br>-2.46 to 2.27     |
| Other neoplasms                               | 3                | 0.34<br>-1.28 to 2.57      |
| Cardiovascular diseases                       | 2                | -2.31<br>-3.69 to -0.84    |
| Rheumatic heart disease                       | 3                | 2.83<br>-0.49 to 6.36      |
| Ischaemic heart disease                       | 3                | 4.51<br>2.74 to 6.88       |
| Cerebrovascular disease                       | 3                | 5.02<br>3.24 to 7.57       |
| Ischaemic stroke                              | 4                | -20.37<br>-23.56 to -17.26 |
| Hemorrhagic stroke                            | 4                | -13.39<br>-16.26 to -10.52 |
| Hypertensive heart disease                    | 3                | 6.33<br>3.72 to 9.7        |
| Cardiomyopathy and myocarditis                | 3                | 3.31<br>0.94 to 6.75       |
| Atrial fibrillation and flutter               | 3                | 4.87<br>2.58 to 8.24       |
| Aortic aneurysm                               | 3                | 4.47<br>2.61 to 7.05       |
| Peripheral vascular disease                   | 3                | 3.3<br>1.18 to 6.27        |
| Endocarditis                                  | 3                | 3.44<br>1.36 to 6.49       |
| Other cardiovascular and circulatory diseases | 3                | 6.59<br>4.22 to 10.22      |
| Chronic respiratory diseases                  | 2                | -1.73<br>-4.26 to 0.08     |

**Appendix Table 11: Percent change before and after CoDCorrect by cause for all ages, both sexes combined, 2016**

| Cause                                                          | CoDCorrect level | Percent change          |
|----------------------------------------------------------------|------------------|-------------------------|
| Chronic obstructive pulmonary disease                          | 3                | 22.07<br>15.67 to 29.72 |
| Pneumoconiosis                                                 | 3                | 11.28<br>6.41 to 18.35  |
| Silicosis                                                      | 4                | 17.85<br>4.81 to 41.94  |
| Asbestosis                                                     | 4                | 5.95<br>-6.33 to 65.56  |
| Coal workers pneumoconiosis                                    | 4                | 44.05<br>18.88 to 98.65 |
| Other pneumoconiosis                                           | 4                | 61.3<br>39.68 to 129.68 |
| Asthma                                                         | 3                | 48.51<br>36.84 to 67.75 |
| Interstitial lung disease and pulmonary sarcoidosis            | 3                | 14.92<br>7.53 to 28.31  |
| Other chronic respiratory diseases                             | 3                | 16.22<br>9.43 to 26.46  |
| Cirrhosis and other chronic liver diseases                     | 2                | 1.21<br>-0.45 to 2.85   |
| Cirrhosis and other chronic liver diseases due to hepatitis B  | 3                | 1.98<br>-0.11 to 4.07   |
| Cirrhosis and other chronic liver diseases due to hepatitis C  | 3                | 0.46<br>-1.01 to 1.71   |
| Cirrhosis and other chronic liver diseases due to alcohol use  | 3                | 1.1<br>-0.38 to 2.76    |
| Cirrhosis and other chronic liver diseases due to other causes | 3                | 1.19<br>-0.7 to 3.11    |
| Digestive diseases                                             | 2                | 0.73<br>-1.24 to 3.0    |
| Peptic ulcer disease                                           | 3                | 25.36<br>18.49 to 38.15 |
| Gastritis and duodenitis                                       | 3                | 15.87<br>7.59 to 27.09  |
| Appendicitis                                                   | 3                | 37.57<br>28.76 to 56.88 |
| Paralytic ileus and intestinal obstruction                     | 3                | 25.12<br>17.0 to 40.05  |
| Inguinal, femoral, and abdominal hernia                        | 3                | 24.89<br>14.27 to 36.77 |
| Inflammatory bowel disease                                     | 3                | 14.61<br>9.28 to 27.84  |
| Vascular intestinal disorders                                  | 3                | 8.63<br>2.5 to 20.16    |
| Gallbladder and biliary diseases                               | 3                | 13.02<br>7.14 to 23.77  |
| Pancreatitis                                                   | 3                | 18.55<br>11.76 to 33.82 |
| Other digestive diseases                                       | 3                | 16.19<br>9.95 to 26.57  |
| Neurological disorders                                         | 2                | -5.31<br>-7.31 to -2.94 |
| Alzheimer's disease and other dementias                        | 3                | -6.09<br>-8.11 to -3.67 |
| Parkinson's disease                                            | 3                | -3.74<br>-5.42 to -1.96 |
| Epilepsy                                                       | 3                | 3.86<br>0.32 to 8.03    |
| Multiple sclerosis                                             | 3                | 0.15<br>-1.14 to 1.99   |



**Appendix Table 11: Percent change before and after CoDCorrect by cause for all ages, both sexes combined, 2016**

| Cause                                               | CoDCorrect level | Percent change             |
|-----------------------------------------------------|------------------|----------------------------|
| Motor neuron disease                                | 3                | -1.16<br>-2.46 to 0.54     |
| Other neurological disorders                        | 3                | -0.0<br>-1.94 to 2.58      |
| Mental and substance use disorders                  | 2                | 0.81<br>-0.75 to 2.48      |
| Alcohol use disorders                               | 3                | 1.01<br>-0.56 to 3.02      |
| Drug use disorders                                  | 3                | 0.58<br>-1.44 to 2.25      |
| Opioid use disorders                                | 4                | -2.19<br>-28.41 to 7.6     |
| Cocaine use disorders                               | 4                | 7.9<br>-5.37 to 40.64      |
| Amphetamine use disorders                           | 4                | 7.24<br>-3.35 to 41.02     |
| Other drug use disorders                            | 4                | 3.64<br>-5.18 to 26.94     |
| Eating disorders                                    | 3                | 1.48<br>-1.62 to 3.75      |
| Anorexia nervosa                                    | 4                | -0.41<br>-20.08 to 20.11   |
| Bulimia nervosa                                     | 4                | -6.92<br>-18.61 to 13.54   |
| Diabetes, urogenital, blood, and endocrine diseases | 2                | -0.54<br>-2.29 to 1.39     |
| Diabetes mellitus                                   | 3                | -0.16<br>-2.16 to 1.65     |
| Acute glomerulonephritis                            | 3                | -1.95<br>-3.62 to 0.98     |
| Chronic kidney disease                              | 3                | -1.27<br>-2.8 to 0.47      |
| Chronic kidney disease due to diabetes mellitus     | 4                | -1.18<br>-2.66 to 0.43     |
| Chronic kidney disease due to hypertension          | 4                | -2.48<br>-4.13 to -0.67    |
| Chronic kidney disease due to glomerulonephritis    | 4                | 0.3<br>-1.38 to 2.2        |
| Chronic kidney disease due to other causes          | 4                | -0.91<br>-2.77 to 0.96     |
| Urinary diseases and male infertility               | 3                | -0.43<br>-2.68 to 1.93     |
| Interstitial nephritis and urinary tract infections | 4                | 41.48<br>25.21 to 85.81    |
| Urolithiasis                                        | 4                | 57.21<br>32.84 to 102.15   |
| Other urinary diseases                              | 4                | 78.72<br>46.6 to 127.05    |
| Gynecological diseases                              | 3                | -1.0<br>-6.28 to 3.12      |
| Uterine fibroids                                    | 4                | 74.29<br>33.86 to 121.39   |
| Polycystic ovarian syndrome                         | 4                | 108.33<br>46.67 to 199.18  |
| Endometriosis                                       | 4                | 60.75<br>20.25 to 145.22   |
| Genital prolapse                                    | 4                | 218.03<br>108.66 to 360.78 |
| Other gynecological diseases                        | 4                | 167.04<br>124.37 to 239.18 |

**Appendix Table 11: Percent change before and after CoDCorrect by cause for all ages, both sexes combined, 2016**

| Cause                                             | CoDCorrect level | Percent change            |
|---------------------------------------------------|------------------|---------------------------|
| Hemoglobinopathies and hemolytic anaemias         | 3                | 2.58<br>-1.44 to 6.77     |
| Thalassemias                                      | 4                | 1.0<br>-7.84 to 9.94      |
| Sickle cell disorders                             | 4                | 2.73<br>-4.09 to 9.67     |
| G6PD deficiency                                   | 4                | 8.67<br>5.94 to 12.14     |
| Other hemoglobinopathies and hemolytic anaemias   | 4                | -0.67<br>-4.14 to 2.28    |
| Endocrine, metabolic, blood, and immune disorders | 3                | -0.9<br>-2.74 to 1.91     |
| Musculoskeletal disorders                         | 2                | -1.68<br>-3.33 to 0.42    |
| Rheumatoid arthritis                              | 3                | -3.15<br>-15.98 to 13.81  |
| Other musculoskeletal disorders                   | 3                | -9.36<br>-24.68 to 8.29   |
| Other non-communicable diseases                   | 2                | 1.24<br>-3.18 to 6.7      |
| Congenital anomalies                              | 3                | 1.09<br>-3.92 to 7.05     |
| Neural tube defects                               | 4                | -29.38<br>-63.33 to 10.79 |
| Congenital heart anomalies                        | 4                | -13.81<br>-32.54 to 9.43  |
| Orofacial clefts                                  | 4                | -20.37<br>-38.17 to 16.29 |
| Down's syndrome                                   | 4                | -5.98<br>-18.46 to 7.83   |
| Other chromosomal abnormalities                   | 4                | -13.55<br>-27.74 to 11.49 |
| Congenital musculoskeletal and limb anomalies     | 4                | -2.91<br>-19.98 to 25.91  |
| Urogenital congenital anomalies                   | 4                | -3.19<br>-16.71 to 15.47  |
| Digestive congenital anomalies                    | 4                | -8.84<br>-23.45 to 19.19  |
| Other congenital anomalies                        | 4                | -15.07<br>-30.39 to 12.31 |
| Skin and subcutaneous diseases                    | 3                | 0.72<br>-1.71 to 4.63     |
| Cellulitis                                        | 4                | 6.98<br>-33.07 to 47.14   |
| Pyoderma                                          | 4                | 28.28<br>-16.21 to 85.32  |
| Decubitus ulcer                                   | 4                | 11.14<br>-28.09 to 53.95  |
| Other skin and subcutaneous diseases              | 4                | 27.13<br>-12.03 to 85.97  |
| Sudden infant death syndrome                      | 3                | 5.99<br>-1.74 to 16.64    |
| Injuries                                          | 1                | 6.11<br>3.31 to 9.85      |
| Transport injuries                                | 2                | 3.48<br>1.42 to 6.65      |
| Road injuries                                     | 3                | -0.54<br>-4.87 to 13.92   |
| Pedestrian road injuries                          | 4                | 0.86<br>-4.09 to 8.01     |

**Appendix Table 11: Percent change before and after CoDCorrect by cause for all ages, both sexes combined, 2016**

| Cause                                           | CoDCorrect level | Percent change           |
|-------------------------------------------------|------------------|--------------------------|
| Cyclist road injuries                           | 4                | 3.39<br>-2.78 to 11.9    |
| Motorcyclist road injuries                      | 4                | 4.57<br>-2.59 to 11.76   |
| Motor vehicle road injuries                     | 4                | 1.06<br>-5.76 to 8.87    |
| Other road injuries                             | 4                | 5.49<br>-1.51 to 13.3    |
| Other transport injuries                        | 3                | 5.68<br>0.6 to 18.29     |
| Unintentional injuries                          | 2                | 1.51<br>-1.15 to 5.1     |
| Falls                                           | 3                | 0.35<br>-2.07 to 3.02    |
| Drowning                                        | 3                | 0.68<br>-4.3 to 6.11     |
| Fire, heat, and hot substances                  | 3                | 3.36<br>0.49 to 6.8      |
| Poisonings                                      | 3                | 3.34<br>0.18 to 7.87     |
| Exposure to mechanical forces                   | 3                | 3.77<br>1.0 to 8.28      |
| Unintentional firearm injuries                  | 4                | 7.99<br>4.28 to 12.65    |
| Unintentional suffocation                       | 4                | 2.23<br>-1.83 to 9.19    |
| Other exposure to mechanical forces             | 4                | 3.24<br>0.84 to 7.36     |
| Adverse effects of medical treatment            | 3                | 2.65<br>0.22 to 5.65     |
| Animal contact                                  | 3                | 2.22<br>-1.93 to 8.1     |
| Venomous animal contact                         | 4                | 23.23<br>-6.45 to 70.97  |
| Non-venomous animal contact                     | 4                | 9.28<br>-14.03 to 43.55  |
| Foreign body                                    | 3                | 1.13<br>-2.11 to 5.44    |
| Pulmonary aspiration and foreign body in airway | 4                | 0.88<br>-2.33 to 5.31    |
| Foreign body in other body part                 | 4                | 3.51<br>-0.08 to 6.77    |
| Other unintentional injuries                    | 3                | 3.67<br>1.32 to 7.84     |
| Self-harm and interpersonal violence            | 2                | 2.73<br>0.72 to 6.18     |
| Self-harm                                       | 3                | 1.79<br>-0.35 to 4.92    |
| Self-harm by firearm                            | 4                | 0.4<br>-15.74 to 14.52   |
| Self-harm by other specified means              | 4                | -7.87<br>-15.97 to 1.63  |
| Interpersonal violence                          | 3                | 4.76<br>1.81 to 10.25    |
| Assault by firearm                              | 4                | -1.59<br>-31.02 to 50.63 |
| Assault by sharp object                         | 4                | 4.13<br>-16.66 to 41.19  |
| Assault by other means                          | 4                | 5.24<br>-16.04 to 32.83  |

**Appendix Table 11: Percent change before and after CoDCorrect by cause for all ages, both sexes combined, 2016**

| Cause                                                                        | CoDCorrect level | Percent change               |
|------------------------------------------------------------------------------|------------------|------------------------------|
| Forces of nature, conflict and terrorism, and executions and police conflict | 2                | 3713.6<br>2297.34 to 7236.58 |
| Maternal deaths aggravated by HIV/AIDS                                       | 3                | -3.63<br>-10.49 to 3.56      |
| Environmental heat and cold exposure                                         | 3                | 1.4<br>-1.48 to 3.5          |
| Acute lymphoid leukaemia                                                     | 4                | 1.81<br>-5.35 to 11.97       |
| Chronic lymphoid leukaemia                                                   | 4                | 0.02<br>-5.76 to 4.86        |
| Acute myeloid leukaemia                                                      | 4                | 1.35<br>-3.24 to 7.78        |
| Chronic myeloid leukaemia                                                    | 4                | 6.01<br>-0.31 to 12.87       |
| Non-melanoma skin cancer (squamous-cell carcinoma)                           | 4                | -14.59<br>-17.41 to -12.46   |
| Executions and police conflict                                               | 3                | 2.99<br>-0.37 to 10.58       |
| Drug-sensitive tuberculosis                                                  | 4                | 6.62<br>3.1 to 10.32         |
| Zika virus                                                                   | 3                | -0.97<br>-7.02 to 7.51       |
| Alcoholic cardiomyopathy                                                     | 4                | -7.31<br>-38.3 to 9.27       |
| Myocarditis                                                                  | 4                | -11.19<br>-19.41 to 2.85     |
| Other leukaemia                                                              | 4                | 2.9<br>-3.46 to 13.65        |
| Other cardiomyopathy                                                         | 4                | -13.22<br>-22.36 to -1.66    |
| Multidrug-resistant tuberculosis without extensive drug resistance           | 4                | 5.64<br>1.91 to 8.93         |
| Extensively drug-resistant tuberculosis                                      | 4                | 2.02<br>-0.06 to 3.95        |

**Appendix Table 12: Socio-Demographic Index R-squared values with lags up to 10 years**

| Lag | Dependent Variable |            |              |              |
|-----|--------------------|------------|--------------|--------------|
|     | $\epsilon(0)$      | $\ln(5q0)$ | $\ln(35q15)$ | $\ln(20q50)$ |
| 0   | 0.734              | 0.487      | 0.655        | 0.725        |
| 1   | 0.738              | 0.484      | 0.657        | 0.729        |
| 2   | 0.739              | 0.473      | 0.654        | 0.733        |
| 3   | 0.735              | 0.445      | 0.646        | 0.739        |
| 4   | 0.729              | 0.42       | 0.636        | 0.743        |
| 5   | 0.713              | 0.381      | 0.626        | 0.741        |
| 6   | 0.704              | 0.35       | 0.61         | 0.736        |
| 7   | 0.712              | 0.356      | 0.614        | 0.746        |
| 8   | 0.704              | 0.345      | 0.607        | 0.741        |
| 9   | 0.702              | 0.336      | 0.601        | 0.738        |
| 10  | 0.701              | 0.333      | 0.598        | 0.737        |

**Appendix Table 13: Socio-Demographic Index groupings by location, based on 2016 values**

| Location                     | SDI Level |
|------------------------------|-----------|
| Aichi                        | High SDI  |
| Akita                        | High SDI  |
| Alabama                      | High SDI  |
| Alaska                       | High SDI  |
| Andorra                      | High SDI  |
| Aomori                       | High SDI  |
| Arizona                      | High SDI  |
| Arkansas                     | High SDI  |
| Australia                    | High SDI  |
| Austria                      | High SDI  |
| Barking and Dagenham         | High SDI  |
| Barnet                       | High SDI  |
| Barnsley                     | High SDI  |
| Bath and North East Somerset | High SDI  |
| Bedford                      | High SDI  |
| Belgium                      | High SDI  |
| Bexley                       | High SDI  |
| Birmingham                   | High SDI  |
| Blackburn with Darwen        | High SDI  |
| Blackpool                    | High SDI  |
| Bolton                       | High SDI  |
| Bournemouth                  | High SDI  |
| Bracknell Forest             | High SDI  |
| Bradford                     | High SDI  |
| Brent                        | High SDI  |
| Brighton and Hove            | High SDI  |
| Bristol, City of             | High SDI  |
| Bromley                      | High SDI  |
| Brunei                       | High SDI  |
| Buckinghamshire              | High SDI  |
| Bury                         | High SDI  |
| Calderdale                   | High SDI  |
| California                   | High SDI  |
| Cambridgeshire               | High SDI  |
| Camden                       | High SDI  |
| Canada                       | High SDI  |
| Central Bedfordshire         | High SDI  |
| Cheshire East                | High SDI  |
| Cheshire West and Chester    | High SDI  |
| Chiba                        | High SDI  |
| Colorado                     | High SDI  |
| Connecticut                  | High SDI  |
| Cornwall                     | High SDI  |
| County Durham                | High SDI  |
| Coventry                     | High SDI  |

**Appendix Table 13: Socio-Demographic Index groupings by location, based on 2016 values**

| <b>Location</b>          | <b>SDI Level</b> |
|--------------------------|------------------|
| Croatia                  | High SDI         |
| Croydon                  | High SDI         |
| Cumbria                  | High SDI         |
| Cyprus                   | High SDI         |
| Czech Republic           | High SDI         |
| Darlington               | High SDI         |
| Delaware                 | High SDI         |
| Denmark                  | High SDI         |
| Derby                    | High SDI         |
| Derbyshire               | High SDI         |
| Devon                    | High SDI         |
| District of Columbia     | High SDI         |
| Doncaster                | High SDI         |
| Dorset                   | High SDI         |
| Dudley                   | High SDI         |
| Ealing                   | High SDI         |
| East Riding of Yorkshire | High SDI         |
| East Sussex              | High SDI         |
| Ehime                    | High SDI         |
| Enfield                  | High SDI         |
| Essex                    | High SDI         |
| Estonia                  | High SDI         |
| Finland                  | High SDI         |
| Florida                  | High SDI         |
| France                   | High SDI         |
| Fukui                    | High SDI         |
| Fukuoka                  | High SDI         |
| Fukushima                | High SDI         |
| Gateshead                | High SDI         |
| Georgia                  | High SDI         |
| Germany                  | High SDI         |
| Gifu                     | High SDI         |
| Gloucestershire          | High SDI         |
| Greece                   | High SDI         |
| Greenwich                | High SDI         |
| Gunma                    | High SDI         |
| Hackney                  | High SDI         |
| Halton                   | High SDI         |
| Hammersmith and Fulham   | High SDI         |
| Hampshire                | High SDI         |
| Haringey                 | High SDI         |
| Harrow                   | High SDI         |
| Hartlepool               | High SDI         |
| Havering                 | High SDI         |
| Hawaii                   | High SDI         |

**Appendix Table 13: Socio-Demographic Index groupings by location, based on 2016 values**

| Location                    | SDI Level |
|-----------------------------|-----------|
| Herefordshire, County of    | High SDI  |
| Hertfordshire               | High SDI  |
| Hillingdon                  | High SDI  |
| Hiroshima                   | High SDI  |
| Hokkaidō                    | High SDI  |
| Hounslow                    | High SDI  |
| Hyōgo                       | High SDI  |
| Ibaraki                     | High SDI  |
| Iceland                     | High SDI  |
| Idaho                       | High SDI  |
| Illinois                    | High SDI  |
| Indiana                     | High SDI  |
| Iowa                        | High SDI  |
| Ireland                     | High SDI  |
| Ishikawa                    | High SDI  |
| Isle of Wight               | High SDI  |
| Islington                   | High SDI  |
| Italy                       | High SDI  |
| Iwate                       | High SDI  |
| Kagawa                      | High SDI  |
| Kagoshima                   | High SDI  |
| Kanagawa                    | High SDI  |
| Kansas                      | High SDI  |
| Kensington and Chelsea      | High SDI  |
| Kent                        | High SDI  |
| Kentucky                    | High SDI  |
| Kingston upon Hull, City of | High SDI  |
| Kingston upon Thames        | High SDI  |
| Kirklees                    | High SDI  |
| Knowsley                    | High SDI  |
| Kumamoto                    | High SDI  |
| Kyōto                       | High SDI  |
| Kōchi                       | High SDI  |
| Lambeth                     | High SDI  |
| Lancashire                  | High SDI  |
| Latvia                      | High SDI  |
| Leeds                       | High SDI  |
| Leicester                   | High SDI  |
| Leicestershire              | High SDI  |
| Lewisham                    | High SDI  |
| Lincolnshire                | High SDI  |
| Lithuania                   | High SDI  |
| Liverpool                   | High SDI  |
| Louisiana                   | High SDI  |
| Luton                       | High SDI  |



**Appendix Table 13: Socio-Demographic Index groupings by location, based on 2016 values**

| <b>Location</b>         | <b>SDI Level</b> |
|-------------------------|------------------|
| Luxembourg              | High SDI         |
| Maine                   | High SDI         |
| Malta                   | High SDI         |
| Manchester              | High SDI         |
| Maryland                | High SDI         |
| Massachusetts           | High SDI         |
| Medway                  | High SDI         |
| Merton                  | High SDI         |
| Michigan                | High SDI         |
| Middlesbrough           | High SDI         |
| Mie                     | High SDI         |
| Milton Keynes           | High SDI         |
| Minnesota               | High SDI         |
| Mississippi             | High SDI         |
| Missouri                | High SDI         |
| Miyagi                  | High SDI         |
| Miyazaki                | High SDI         |
| Montana                 | High SDI         |
| Nagano                  | High SDI         |
| Nagasaki                | High SDI         |
| Nara                    | High SDI         |
| Nebraska                | High SDI         |
| Netherlands             | High SDI         |
| Nevada                  | High SDI         |
| New Hampshire           | High SDI         |
| New Jersey              | High SDI         |
| New Mexico              | High SDI         |
| New York                | High SDI         |
| New Zealand             | High SDI         |
| Newcastle upon Tyne     | High SDI         |
| Newham                  | High SDI         |
| Niigata                 | High SDI         |
| Norfolk                 | High SDI         |
| North Carolina          | High SDI         |
| North Dakota            | High SDI         |
| North East Lincolnshire | High SDI         |
| North Lincolnshire      | High SDI         |
| North Somerset          | High SDI         |
| North Tyneside          | High SDI         |
| North Yorkshire         | High SDI         |
| Northamptonshire        | High SDI         |
| Northern Ireland        | High SDI         |
| Northumberland          | High SDI         |
| Norway                  | High SDI         |
| Nottingham              | High SDI         |

**Appendix Table 13: Socio-Demographic Index groupings by location, based on 2016 values**

| <b>Location</b>       | <b>SDI Level</b> |
|-----------------------|------------------|
| Nottinghamshire       | High SDI         |
| Ohio                  | High SDI         |
| Okayama               | High SDI         |
| Okinawa               | High SDI         |
| Oklahoma              | High SDI         |
| Oldham                | High SDI         |
| Oregon                | High SDI         |
| Oxfordshire           | High SDI         |
| Pennsylvania          | High SDI         |
| Peterborough          | High SDI         |
| Plymouth              | High SDI         |
| Poland                | High SDI         |
| Poole                 | High SDI         |
| Portsmouth            | High SDI         |
| Puerto Rico           | High SDI         |
| Reading               | High SDI         |
| Redbridge             | High SDI         |
| Redcar and Cleveland  | High SDI         |
| Rhode Island          | High SDI         |
| Richmond upon Thames  | High SDI         |
| Rochdale              | High SDI         |
| Rotherham             | High SDI         |
| Rutland               | High SDI         |
| Saga                  | High SDI         |
| Saitama               | High SDI         |
| Salford               | High SDI         |
| Sandwell              | High SDI         |
| Scotland              | High SDI         |
| Sefton                | High SDI         |
| Sheffield             | High SDI         |
| Shiga                 | High SDI         |
| Shimane               | High SDI         |
| Shizuoka              | High SDI         |
| Shropshire            | High SDI         |
| Singapore             | High SDI         |
| Slough                | High SDI         |
| Slovakia              | High SDI         |
| Slovenia              | High SDI         |
| Solihull              | High SDI         |
| Somerset              | High SDI         |
| South Carolina        | High SDI         |
| South Dakota          | High SDI         |
| South Gloucestershire | High SDI         |
| South Korea           | High SDI         |
| South Tyneside        | High SDI         |

**Appendix Table 13: Socio-Demographic Index groupings by location, based on 2016 values**

| <b>Location</b>            | <b>SDI Level</b> |
|----------------------------|------------------|
| Southampton                | High SDI         |
| Southend-on-Sea            | High SDI         |
| Southwark                  | High SDI         |
| St Helens                  | High SDI         |
| Staffordshire              | High SDI         |
| Stockholm                  | High SDI         |
| Stockport                  | High SDI         |
| Stockton-on-Tees           | High SDI         |
| Stoke-on-Trent             | High SDI         |
| Suffolk                    | High SDI         |
| Sunderland                 | High SDI         |
| Surrey                     | High SDI         |
| Sutton                     | High SDI         |
| Sweden except Stockholm    | High SDI         |
| Swindon                    | High SDI         |
| Switzerland                | High SDI         |
| Taiwan (province of China) | High SDI         |
| Tameside                   | High SDI         |
| Telford and Wrekin         | High SDI         |
| Tennessee                  | High SDI         |
| Texas                      | High SDI         |
| Thurrock                   | High SDI         |
| Tochigi                    | High SDI         |
| Tokushima                  | High SDI         |
| Torbay                     | High SDI         |
| Tottori                    | High SDI         |
| Tower Hamlets              | High SDI         |
| Toyama                     | High SDI         |
| Trafford                   | High SDI         |
| Tōkyō                      | High SDI         |
| Utah                       | High SDI         |
| Vermont                    | High SDI         |
| Virgin Islands             | High SDI         |
| Virginia                   | High SDI         |
| Wakayama                   | High SDI         |
| Wakefield                  | High SDI         |
| Wales                      | High SDI         |
| Walsall                    | High SDI         |
| Waltham Forest             | High SDI         |
| Wandsworth                 | High SDI         |
| Warrington                 | High SDI         |
| Warwickshire               | High SDI         |
| Washington                 | High SDI         |
| West Berkshire             | High SDI         |
| West Sussex                | High SDI         |

**Appendix Table 13: Socio-Demographic Index groupings by location, based on 2016 values**

| Location                                         | SDI Level       |
|--------------------------------------------------|-----------------|
| West Virginia                                    | High SDI        |
| Westminster                                      | High SDI        |
| Wigan                                            | High SDI        |
| Wiltshire                                        | High SDI        |
| Windsor and Maidenhead                           | High SDI        |
| Wirral                                           | High SDI        |
| Wisconsin                                        | High SDI        |
| Wokingham                                        | High SDI        |
| Wolverhampton                                    | High SDI        |
| Worcestershire                                   | High SDI        |
| Wyoming                                          | High SDI        |
| Yamagata                                         | High SDI        |
| Yamaguchi                                        | High SDI        |
| Yamanashi                                        | High SDI        |
| York                                             | High SDI        |
| Ôita                                             | High SDI        |
| Ôsaka                                            | High SDI        |
| 'Asir                                            | High-middle SDI |
| Antigua and Barbuda                              | High-middle SDI |
| Argentina                                        | High-middle SDI |
| Armenia                                          | High-middle SDI |
| Azerbaijan                                       | High-middle SDI |
| Bahah                                            | High-middle SDI |
| Barbados                                         | High-middle SDI |
| Beijing                                          | High-middle SDI |
| Belarus                                          | High-middle SDI |
| Bermuda                                          | High-middle SDI |
| Bulgaria                                         | High-middle SDI |
| Chile                                            | High-middle SDI |
| Cuba                                             | High-middle SDI |
| Delhi, Urban                                     | High-middle SDI |
| Distrito Federal                                 | High-middle SDI |
| Eastern Province                                 | High-middle SDI |
| Georgia                                          | High-middle SDI |
| Goa, Urban                                       | High-middle SDI |
| Greenland                                        | High-middle SDI |
| Guam                                             | High-middle SDI |
| Guangdong                                        | High-middle SDI |
| Ha'il                                            | High-middle SDI |
| Himachal Pradesh, Urban                          | High-middle SDI |
| Hong Kong Special Administrative Region of China | High-middle SDI |
| Hungary                                          | High-middle SDI |
| Iran                                             | High-middle SDI |
| Israel                                           | High-middle SDI |

**Appendix Table 13: Socio-Demographic Index groupings by location, based on 2016 values**

| Location                                     | SDI Level       |
|----------------------------------------------|-----------------|
| Jakarta                                      | High-middle SDI |
| Jawf                                         | High-middle SDI |
| Jiangsu                                      | High-middle SDI |
| Jizan                                        | High-middle SDI |
| East Kalimantan                              | High-middle SDI |
| North Kalimantan                             | High-middle SDI |
| Kazakhstan                                   | High-middle SDI |
| Riau Islands                                 | High-middle SDI |
| Kuwait                                       | High-middle SDI |
| Lebanon                                      | High-middle SDI |
| Libya                                        | High-middle SDI |
| Macao Special Administrative Region of China | High-middle SDI |
| Macedonia                                    | High-middle SDI |
| Madinah                                      | High-middle SDI |
| Makkah                                       | High-middle SDI |
| Malaysia                                     | High-middle SDI |
| Mauritius                                    | High-middle SDI |
| Montenegro                                   | High-middle SDI |
| Najran                                       | High-middle SDI |
| Northern Borders                             | High-middle SDI |
| Northern Mariana Islands                     | High-middle SDI |
| Panama                                       | High-middle SDI |
| Portugal                                     | High-middle SDI |
| Qassim                                       | High-middle SDI |
| Qatar                                        | High-middle SDI |
| Rio de Janeiro                               | High-middle SDI |
| Riyadh                                       | High-middle SDI |
| Romania                                      | High-middle SDI |
| Russia                                       | High-middle SDI |
| Serbia                                       | High-middle SDI |
| Shanghai                                     | High-middle SDI |
| Spain                                        | High-middle SDI |
| São Paulo                                    | High-middle SDI |
| Tabuk                                        | High-middle SDI |
| The Bahamas                                  | High-middle SDI |
| Tianjin                                      | High-middle SDI |
| Trinidad and Tobago                          | High-middle SDI |
| Turkey                                       | High-middle SDI |
| Turkmenistan                                 | High-middle SDI |
| Ukraine                                      | High-middle SDI |
| United Arab Emirates                         | High-middle SDI |
| Zhejiang                                     | High-middle SDI |
| Aceh                                         | Middle SDI      |
| Acre                                         | Middle SDI      |

**Appendix Table 13: Socio-Demographic Index groupings by location, based on 2016 values**

| Location                | SDI Level  |
|-------------------------|------------|
| Aguascalientes          | Middle SDI |
| Albania                 | Middle SDI |
| Algeria                 | Middle SDI |
| Amapá                   | Middle SDI |
| Amazonas                | Middle SDI |
| American Samoa          | Middle SDI |
| Andhra Pradesh, Urban   | Middle SDI |
| Anhui                   | Middle SDI |
| Assam, Urban            | Middle SDI |
| Bahia                   | Middle SDI |
| Bahrain                 | Middle SDI |
| Baja California         | Middle SDI |
| Baja California Sur     | Middle SDI |
| Bali                    | Middle SDI |
| Bangka–Belitung Islands | Middle SDI |
| Banten                  | Middle SDI |
| Bengkulu                | Middle SDI |
| Bosnia and Herzegovina  | Middle SDI |
| Botswana                | Middle SDI |
| Campeche                | Middle SDI |
| Chhattisgarh, Urban     | Middle SDI |
| Chiapas                 | Middle SDI |
| Chihuahua               | Middle SDI |
| Chongqing               | Middle SDI |
| Coahuila                | Middle SDI |
| Colima                  | Middle SDI |
| Colombia                | Middle SDI |
| Costa Rica              | Middle SDI |
| Delhi, Rural            | Middle SDI |
| Distrito Federal        | Middle SDI |
| Dominica                | Middle SDI |
| Dominican Republic      | Middle SDI |
| Durango                 | Middle SDI |
| Eastern Cape            | Middle SDI |
| Ecuador                 | Middle SDI |
| Egypt                   | Middle SDI |
| El Salvador             | Middle SDI |
| Equatorial Guinea       | Middle SDI |
| Espírito Santo          | Middle SDI |
| Fiji                    | Middle SDI |
| Free State              | Middle SDI |
| Fujian                  | Middle SDI |
| Gauteng                 | Middle SDI |
| Goa, Rural              | Middle SDI |
| Goiás                   | Middle SDI |

**Appendix Table 13: Socio-Demographic Index groupings by location, based on 2016 values**

| <b>Location</b>          | <b>SDI Level</b> |
|--------------------------|------------------|
| Grenada                  | Middle SDI       |
| Guanajuato               | Middle SDI       |
| Guangxi                  | Middle SDI       |
| Guerrero                 | Middle SDI       |
| Gujarat, Urban           | Middle SDI       |
| Guyana                   | Middle SDI       |
| Hainan                   | Middle SDI       |
| Haryana, Urban           | Middle SDI       |
| Hebei                    | Middle SDI       |
| Heilongjiang             | Middle SDI       |
| Henan                    | Middle SDI       |
| Hidalgo                  | Middle SDI       |
| Himachal Pradesh, Rural  | Middle SDI       |
| Hubei                    | Middle SDI       |
| Hunan                    | Middle SDI       |
| Inner Mongolia           | Middle SDI       |
| Jalisco                  | Middle SDI       |
| Jamaica                  | Middle SDI       |
| Jambi                    | Middle SDI       |
| Jammu and Kashmir, Urban | Middle SDI       |
| West Java                | Middle SDI       |
| East Java                | Middle SDI       |
| Jharkhand, Urban         | Middle SDI       |
| Jiangxi                  | Middle SDI       |
| Jilin                    | Middle SDI       |
| Jordan                   | Middle SDI       |
| South Kalimantan         | Middle SDI       |
| Central Kalimantan       | Middle SDI       |
| Karnataka, Urban         | Middle SDI       |
| Kerala, Rural            | Middle SDI       |
| Kerala, Urban            | Middle SDI       |
| KwaZulu-Natal            | Middle SDI       |
| Lampung                  | Middle SDI       |
| Liaoning                 | Middle SDI       |
| Limpopo                  | Middle SDI       |
| Madhya Pradesh, Urban    | Middle SDI       |
| Maharashtra, Urban       | Middle SDI       |
| Maldives                 | Middle SDI       |
| Manipur, Urban           | Middle SDI       |
| Mato Grosso              | Middle SDI       |
| Mato Grosso do Sul       | Middle SDI       |
| Meghalaya, Urban         | Middle SDI       |
| Michoacán de Ocampo      | Middle SDI       |
| Minas Gerais             | Middle SDI       |
| Mizoram, Urban           | Middle SDI       |

**Appendix Table 13: Socio-Demographic Index groupings by location, based on 2016 values**

| <b>Location</b>                  | <b>SDI Level</b> |
|----------------------------------|------------------|
| Moldova                          | Middle SDI       |
| Mongolia                         | Middle SDI       |
| Morelos                          | Middle SDI       |
| Mpumalanga                       | Middle SDI       |
| México                           | Middle SDI       |
| Nagaland, Urban                  | Middle SDI       |
| Nayarit                          | Middle SDI       |
| Ningxia                          | Middle SDI       |
| North-West                       | Middle SDI       |
| Northern Cape                    | Middle SDI       |
| Nuevo León                       | Middle SDI       |
| Oaxaca                           | Middle SDI       |
| Oman                             | Middle SDI       |
| West Papua                       | Middle SDI       |
| Paraguay                         | Middle SDI       |
| Paraná                           | Middle SDI       |
| Pernambuco                       | Middle SDI       |
| Peru                             | Middle SDI       |
| Philippines                      | Middle SDI       |
| Puebla                           | Middle SDI       |
| Punjab, Urban                    | Middle SDI       |
| Qinghai                          | Middle SDI       |
| Querétaro                        | Middle SDI       |
| Quintana Roo                     | Middle SDI       |
| Riau                             | Middle SDI       |
| Rio Grande do Norte              | Middle SDI       |
| Rio Grande do Sul                | Middle SDI       |
| Rondônia                         | Middle SDI       |
| Roraima                          | Middle SDI       |
| Saint Lucia                      | Middle SDI       |
| Saint Vincent and the Grenadines | Middle SDI       |
| San Luis Potosí                  | Middle SDI       |
| Santa Catarina                   | Middle SDI       |
| Sergipe                          | Middle SDI       |
| Seychelles                       | Middle SDI       |
| Shaanxi                          | Middle SDI       |
| Shandong                         | Middle SDI       |
| Shanxi                           | Middle SDI       |
| Sichuan                          | Middle SDI       |
| Sikkim, Urban                    | Middle SDI       |
| Sinaloa                          | Middle SDI       |
| Sonora                           | Middle SDI       |
| Sri Lanka                        | Middle SDI       |
| South Sulawesi                   | Middle SDI       |
| North Sulawesi                   | Middle SDI       |



**Appendix Table 13: Socio-Demographic Index groupings by location, based on 2016 values**

| Location                         | SDI Level      |
|----------------------------------|----------------|
| West Sumatra                     | Middle SDI     |
| South Sumatra                    | Middle SDI     |
| North Sumatra                    | Middle SDI     |
| Suriname                         | Middle SDI     |
| Tabasco                          | Middle SDI     |
| Tamaulipas                       | Middle SDI     |
| Tamil Nadu, Urban                | Middle SDI     |
| Telangana, Urban                 | Middle SDI     |
| Thailand                         | Middle SDI     |
| The Six Minor Territories, Urban | Middle SDI     |
| Tlaxcala                         | Middle SDI     |
| Tocantins                        | Middle SDI     |
| Tunisia                          | Middle SDI     |
| Uruguay                          | Middle SDI     |
| Uttarakhand, Urban               | Middle SDI     |
| Uzbekistan                       | Middle SDI     |
| Venezuela                        | Middle SDI     |
| Veracruz de Ignacio de la Llave  | Middle SDI     |
| Vietnam                          | Middle SDI     |
| West Bengal, Urban               | Middle SDI     |
| Western Cape                     | Middle SDI     |
| Xinjiang                         | Middle SDI     |
| Yogyakarta                       | Middle SDI     |
| Yucatán                          | Middle SDI     |
| Yunnan                           | Middle SDI     |
| Zacatecas                        | Middle SDI     |
| Alagoas                          | Low-middle SDI |
| Andhra Pradesh, Rural            | Low-middle SDI |
| Arunachal Pradesh, Rural         | Low-middle SDI |
| Arunachal Pradesh, Urban         | Low-middle SDI |
| Assam, Rural                     | Low-middle SDI |
| Bangladesh                       | Low-middle SDI |
| Baringo                          | Low-middle SDI |
| Belize                           | Low-middle SDI |
| Bhutan                           | Low-middle SDI |
| Bihar, Urban                     | Low-middle SDI |
| Bolivia                          | Low-middle SDI |
| Bomet                            | Low-middle SDI |
| Bungoma                          | Low-middle SDI |
| Busia                            | Low-middle SDI |
| Cambodia                         | Low-middle SDI |
| Cameroon                         | Low-middle SDI |
| Cape Verde                       | Low-middle SDI |
| Ceará                            | Low-middle SDI |
| Chhattisgarh, Rural              | Low-middle SDI |

**Appendix Table 13: Socio-Demographic Index groupings by location, based on 2016 values**

| Location                       | SDI Level      |
|--------------------------------|----------------|
| Congo (Brazzaville)            | Low-middle SDI |
| Elgeyo-Marakwet                | Low-middle SDI |
| Embu                           | Low-middle SDI |
| Federated States of Micronesia | Low-middle SDI |
| Gabon                          | Low-middle SDI |
| Gansu                          | Low-middle SDI |
| Garissa                        | Low-middle SDI |
| Ghana                          | Low-middle SDI |
| Gorontalo                      | Low-middle SDI |
| Guatemala                      | Low-middle SDI |
| Guizhou                        | Low-middle SDI |
| Gujarat, Rural                 | Low-middle SDI |
| Haryana, Rural                 | Low-middle SDI |
| HomaBay                        | Low-middle SDI |
| Honduras                       | Low-middle SDI |
| Iraq                           | Low-middle SDI |
| Isiolo                         | Low-middle SDI |
| Jammu and Kashmir, Rural       | Low-middle SDI |
| Central Java                   | Low-middle SDI |
| Jharkhand, Rural               | Low-middle SDI |
| Kajiado                        | Low-middle SDI |
| Kakamega                       | Low-middle SDI |
| West Kalimantan                | Low-middle SDI |
| Karnataka, Rural               | Low-middle SDI |
| Kericho                        | Low-middle SDI |
| Kiambu                         | Low-middle SDI |
| Kilifi                         | Low-middle SDI |
| Kirinyaga                      | Low-middle SDI |
| Kisii                          | Low-middle SDI |
| Kisumu                         | Low-middle SDI |
| Kitui                          | Low-middle SDI |
| Kwale                          | Low-middle SDI |
| Kyrgyzstan                     | Low-middle SDI |
| Laikipia                       | Low-middle SDI |
| Lamu                           | Low-middle SDI |
| Laos                           | Low-middle SDI |
| Lesotho                        | Low-middle SDI |
| Machakos                       | Low-middle SDI |
| Madhya Pradesh, Rural          | Low-middle SDI |
| Maharashtra, Rural             | Low-middle SDI |
| Makueni                        | Low-middle SDI |
| Maluku                         | Low-middle SDI |
| North Maluku                   | Low-middle SDI |
| Mandera                        | Low-middle SDI |
| Manipur, Rural                 | Low-middle SDI |

**Appendix Table 13: Socio-Demographic Index groupings by location, based on 2016 values**

| Location           | SDI Level      |
|--------------------|----------------|
| Maranhão           | Low-middle SDI |
| Marsabit           | Low-middle SDI |
| Marshall Islands   | Low-middle SDI |
| Mauritania         | Low-middle SDI |
| Meghalaya, Rural   | Low-middle SDI |
| Meru               | Low-middle SDI |
| Migori             | Low-middle SDI |
| Mizoram, Rural     | Low-middle SDI |
| Mombasa            | Low-middle SDI |
| Morocco            | Low-middle SDI |
| Murang'a           | Low-middle SDI |
| Myanmar            | Low-middle SDI |
| Nagaland, Rural    | Low-middle SDI |
| Nairobi            | Low-middle SDI |
| Nakuru             | Low-middle SDI |
| Namibia            | Low-middle SDI |
| Nandi              | Low-middle SDI |
| Narok              | Low-middle SDI |
| Nepal              | Low-middle SDI |
| Nicaragua          | Low-middle SDI |
| Nigeria            | Low-middle SDI |
| North Korea        | Low-middle SDI |
| West Nusa Tenggara | Low-middle SDI |
| East Nusa Tenggara | Low-middle SDI |
| Nyamira            | Low-middle SDI |
| Nyandarua          | Low-middle SDI |
| Nyeri              | Low-middle SDI |
| Odisha, Rural      | Low-middle SDI |
| Odisha, Urban      | Low-middle SDI |
| Pakistan           | Low-middle SDI |
| Papua              | Low-middle SDI |
| Paraíba            | Low-middle SDI |
| Pará               | Low-middle SDI |
| Piauí              | Low-middle SDI |
| Punjab, Rural      | Low-middle SDI |
| Rajasthan, Rural   | Low-middle SDI |
| Rajasthan, Urban   | Low-middle SDI |
| Samburu            | Low-middle SDI |
| Samoa              | Low-middle SDI |
| Siaya              | Low-middle SDI |
| Sikkim, Rural      | Low-middle SDI |
| Sudan              | Low-middle SDI |
| West Sulawesi      | Low-middle SDI |
| Central Sulawesi   | Low-middle SDI |
| Southeast Sulawesi | Low-middle SDI |

**Appendix Table 13: Socio-Demographic Index groupings by location, based on 2016 values**

| Location                         | SDI Level      |
|----------------------------------|----------------|
| Swaziland                        | Low-middle SDI |
| Syria                            | Low-middle SDI |
| Taita Taveta                     | Low-middle SDI |
| Tajikistan                       | Low-middle SDI |
| Tamil Nadu, Rural                | Low-middle SDI |
| TanaRiver                        | Low-middle SDI |
| Telangana, Rural                 | Low-middle SDI |
| TharakaNithi                     | Low-middle SDI |
| The Six Minor Territories, Rural | Low-middle SDI |
| Tibet                            | Low-middle SDI |
| Timor-Leste                      | Low-middle SDI |
| Tonga                            | Low-middle SDI |
| TransNzoia                       | Low-middle SDI |
| Tripura, Rural                   | Low-middle SDI |
| Tripura, Urban                   | Low-middle SDI |
| Turkana                          | Low-middle SDI |
| UasinGishu                       | Low-middle SDI |
| Uttar Pradesh, Rural             | Low-middle SDI |
| Uttar Pradesh, Urban             | Low-middle SDI |
| Uttarakhand, Rural               | Low-middle SDI |
| Vanuatu                          | Low-middle SDI |
| Vihiga                           | Low-middle SDI |
| Wajir                            | Low-middle SDI |
| West Bengal, Rural               | Low-middle SDI |
| WestPokot                        | Low-middle SDI |
| Zambia                           | Low-middle SDI |
| Zimbabwe                         | Low-middle SDI |
| Afghanistan                      | Low SDI        |
| Angola                           | Low SDI        |
| Benin                            | Low SDI        |
| Bihar, Rural                     | Low SDI        |
| Burkina Faso                     | Low SDI        |
| Burundi                          | Low SDI        |
| Central African Republic         | Low SDI        |
| Chad                             | Low SDI        |
| Comoros                          | Low SDI        |
| Cote d'Ivoire                    | Low SDI        |
| Democratic Republic of the Congo | Low SDI        |
| Djibouti                         | Low SDI        |
| Eritrea                          | Low SDI        |
| Ethiopia                         | Low SDI        |
| Guinea                           | Low SDI        |
| Guinea-Bissau                    | Low SDI        |
| Haiti                            | Low SDI        |
| Kiribati                         | Low SDI        |

**Appendix Table 13: Socio-Demographic Index groupings by location, based on 2016 values**

| <b>Location</b>       | <b>SDI Level</b> |
|-----------------------|------------------|
| Liberia               | Low SDI          |
| Madagascar            | Low SDI          |
| Malawi                | Low SDI          |
| Mali                  | Low SDI          |
| Mozambique            | Low SDI          |
| Niger                 | Low SDI          |
| Palestine             | Low SDI          |
| Papua New Guinea      | Low SDI          |
| Rwanda                | Low SDI          |
| Sao Tome and Principe | Low SDI          |
| Senegal               | Low SDI          |
| Sierra Leone          | Low SDI          |
| Solomon Islands       | Low SDI          |
| Somalia               | Low SDI          |
| South Sudan           | Low SDI          |
| Tanzania              | Low SDI          |
| The Gambia            | Low SDI          |
| Togo                  | Low SDI          |
| Uganda                | Low SDI          |
| Yemen                 | Low SDI          |

**Appendix Table 14: Socio-Demographic Index values for all estimated GBD 2016 locations, 1980–2016**

| Location                                         | 1980  | 1981  | 1982  | 1983  | 1984  | 1985  | 1986  | 1987  | 1988  | 1989  | 1990  | 1991  | 1992  | 1993  | 1994  | 1995  | 1996  | 1997  | 1998  | 1999  | 2000  | 2001  | 2002  | 2003  | 2004  | 2005  | 2006  | 2007  | 2008  | 2009  | 2010  | 2011  | 2012  | 2013  | 2014  | 2015  | 2016  |       |
|--------------------------------------------------|-------|-------|-------|-------|-------|-------|-------|-------|-------|-------|-------|-------|-------|-------|-------|-------|-------|-------|-------|-------|-------|-------|-------|-------|-------|-------|-------|-------|-------|-------|-------|-------|-------|-------|-------|-------|-------|-------|
| Global                                           | 0.526 | 0.531 | 0.535 | 0.54  | 0.544 | 0.549 | 0.554 | 0.559 | 0.564 | 0.569 | 0.575 | 0.58  | 0.586 | 0.591 | 0.596 | 0.6   | 0.605 | 0.609 | 0.614 | 0.618 | 0.622 | 0.626 | 0.63  | 0.634 | 0.639 | 0.643 | 0.648 | 0.652 | 0.657 | 0.662 | 0.666 | 0.671 | 0.676 | 0.681 | 0.686 | 0.691 | 0.696 |       |
| Southeast Asia, East Asia, and Oceania           | 0.438 | 0.445 | 0.453 | 0.461 | 0.47  | 0.478 | 0.486 | 0.495 | 0.504 | 0.512 | 0.521 | 0.53  | 0.539 | 0.548 | 0.556 | 0.565 | 0.573 | 0.581 | 0.587 | 0.594 | 0.6   | 0.606 | 0.612 | 0.619 | 0.626 | 0.633 | 0.641 | 0.65  | 0.658 | 0.666 | 0.675 | 0.683 | 0.691 | 0.699 | 0.706 | 0.712 | 0.719 |       |
| East Asia                                        | 0.436 | 0.443 | 0.45  | 0.458 | 0.467 | 0.477 | 0.486 | 0.496 | 0.506 | 0.515 | 0.524 | 0.533 | 0.543 | 0.552 | 0.562 | 0.571 | 0.58  | 0.588 | 0.594 | 0.601 | 0.608 | 0.614 | 0.621 | 0.629 | 0.636 | 0.644 | 0.653 | 0.661 | 0.67  | 0.678 | 0.686 | 0.694 | 0.701 | 0.709 | 0.715 | 0.722 | 0.729 |       |
| China                                            | 0.42  | 0.428 | 0.435 | 0.444 | 0.453 | 0.463 | 0.473 | 0.483 | 0.494 | 0.503 | 0.512 | 0.521 | 0.531 | 0.542 | 0.552 | 0.562 | 0.57  | 0.578 | 0.585 | 0.592 | 0.6   | 0.607 | 0.614 | 0.622 | 0.63  | 0.638 | 0.647 | 0.657 | 0.665 | 0.674 | 0.682 | 0.691 | 0.698 | 0.706 | 0.713 | 0.72  | 0.727 |       |
| North Korea                                      | 0.471 | 0.476 | 0.48  | 0.485 | 0.488 | 0.491 | 0.494 | 0.497 | 0.499 | 0.502 | 0.505 | 0.508 | 0.51  | 0.511 | 0.511 | 0.51  | 0.506 | 0.501 | 0.495 | 0.489 | 0.483 | 0.478 | 0.474 | 0.47  | 0.468 | 0.468 | 0.469 | 0.47  | 0.471 | 0.473 | 0.474 | 0.476 | 0.478 | 0.481 | 0.484 | 0.488 | 0.491 | 0.494 |
| Taiwan (province of China)                       | 0.636 | 0.645 | 0.657 | 0.669 | 0.681 | 0.695 | 0.706 | 0.71  | 0.719 | 0.727 | 0.734 | 0.743 | 0.751 | 0.759 | 0.766 | 0.775 | 0.785 | 0.798 | 0.8   | 0.808 | 0.813 | 0.82  | 0.824 | 0.829 | 0.833 | 0.837 | 0.842 | 0.845 | 0.849 | 0.853 | 0.858 | 0.864 | 0.868 | 0.874 | 0.878 | 0.881 | 0.885 |       |
| Hong Kong Special Administrative Region of China | 0.633 | 0.643 | 0.652 | 0.662 | 0.671 | 0.677 | 0.682 | 0.688 | 0.694 | 0.699 | 0.704 | 0.708 | 0.713 | 0.718 | 0.723 | 0.727 | 0.731 | 0.734 | 0.737 | 0.74  | 0.743 | 0.746 | 0.749 | 0.752 | 0.756 | 0.761 | 0.765 | 0.77  | 0.775 | 0.779 | 0.783 | 0.787 | 0.791 | 0.795 | 0.798 | 0.801 | 0.805 |       |
| Macao Special Administrative Region of China     | 0.638 | 0.646 | 0.654 | 0.66  | 0.667 | 0.672 | 0.678 | 0.684 | 0.689 | 0.695 | 0.7   | 0.705 | 0.711 | 0.716 | 0.721 | 0.725 | 0.728 | 0.731 | 0.732 | 0.734 | 0.735 | 0.738 | 0.742 | 0.747 | 0.754 | 0.761 | 0.768 | 0.776 | 0.784 | 0.789 | 0.793 | 0.796 | 0.799 | 0.802 | 0.806 | 0.809 | 0.811 |       |
| China (without Hong Kong and Macao)              | 0.413 | 0.42  | 0.428 | 0.436 | 0.446 | 0.456 | 0.467 | 0.477 | 0.487 | 0.497 | 0.506 | 0.515 | 0.525 | 0.536 | 0.546 | 0.556 | 0.565 | 0.574 | 0.581 | 0.588 | 0.596 | 0.603 | 0.611 | 0.619 | 0.627 | 0.635 | 0.645 | 0.654 | 0.663 | 0.672 | 0.68  | 0.689 | 0.697 | 0.704 | 0.712 | 0.718 | 0.725 |       |
| Anhui                                            | 0.353 | 0.36  | 0.367 | 0.375 | 0.385 | 0.396 | 0.406 | 0.417 | 0.427 | 0.437 | 0.446 | 0.455 | 0.464 | 0.474 | 0.483 | 0.493 | 0.502 | 0.51  | 0.518 | 0.525 | 0.532 | 0.538 | 0.545 | 0.552 | 0.559 | 0.567 | 0.576 | 0.585 | 0.594 | 0.603 | 0.611 | 0.619 | 0.626 | 0.633 | 0.639 | 0.645 | 0.651 |       |
| Beijing                                          | 0.606 | 0.612 | 0.618 | 0.624 | 0.631 | 0.638 | 0.645 | 0.653 | 0.659 | 0.665 | 0.671 | 0.676 | 0.682 | 0.689 | 0.695 | 0.702 | 0.709 | 0.715 | 0.721 | 0.726 | 0.732 | 0.738 | 0.744 | 0.75  | 0.757 | 0.764 | 0.772 | 0.78  | 0.787 | 0.795 | 0.802 | 0.809 | 0.816 | 0.823 | 0.829 | 0.835 | 0.842 |       |
| Chongqing                                        | 0.367 | 0.375 | 0.384 | 0.394 | 0.407 | 0.419 | 0.431 | 0.443 | 0.454 | 0.464 | 0.474 | 0.485 | 0.496 | 0.507 | 0.519 | 0.53  | 0.539 | 0.549 | 0.557 | 0.565 | 0.574 | 0.582 | 0.591 | 0.599 | 0.607 | 0.616 | 0.625 | 0.635 | 0.643 | 0.652 | 0.66  | 0.668 | 0.675 | 0.682 | 0.689 | 0.694 | 0.7   |       |
| Fujian                                           | 0.372 | 0.378 | 0.386 | 0.396 | 0.408 | 0.42  | 0.433 | 0.445 | 0.458 | 0.469 | 0.48  | 0.492 | 0.504 | 0.518 | 0.531 | 0.544 | 0.555 | 0.564 | 0.573 | 0.581 | 0.59  | 0.598 | 0.606 | 0.615 | 0.623 | 0.632 | 0.642 | 0.652 | 0.662 | 0.671 | 0.68  | 0.689 | 0.698 | 0.706 | 0.713 | 0.72  | 0.727 |       |
| Gansu                                            | 0.353 | 0.358 | 0.364 | 0.372 | 0.382 | 0.391 | 0.401 | 0.411 | 0.421 | 0.431 | 0.438 | 0.447 | 0.456 | 0.465 | 0.473 | 0.482 | 0.49  | 0.498 | 0.506 | 0.513 | 0.52  | 0.526 | 0.533 | 0.539 | 0.546 | 0.553 | 0.56  | 0.568 | 0.575 | 0.583 | 0.59  | 0.597 | 0.604 | 0.61  | 0.616 | 0.622 | 0.628 |       |
| Guangdong                                        | 0.444 | 0.451 | 0.458 | 0.467 | 0.476 | 0.487 | 0.497 | 0.507 | 0.518 | 0.527 | 0.536 | 0.546 | 0.557 | 0.567 | 0.578 | 0.588 | 0.598 | 0.607 | 0.615 | 0.623 | 0.632 | 0.64  | 0.648 | 0.658 | 0.667 | 0.678 | 0.688 | 0.7   | 0.71  | 0.72  | 0.729 | 0.737 | 0.745 | 0.753 | 0.761 | 0.768 | 0.775 |       |
| Guangxi                                          | 0.361 | 0.369 | 0.376 | 0.385 | 0.395 | 0.406 | 0.417 | 0.428 | 0.439 | 0.449 | 0.458 | 0.468 | 0.479 | 0.49  | 0.501 | 0.511 | 0.521 | 0.531 | 0.539 | 0.547 | 0.555 | 0.562 | 0.569 | 0.577 | 0.585 | 0.594 | 0.603 | 0.613 | 0.622 | 0.632 | 0.641 | 0.651 | 0.661 | 0.67  | 0.679 | 0.686 | 0.693 |       |
| Guizhou                                          | 0.279 | 0.287 | 0.295 | 0.303 | 0.314 | 0.325 | 0.336 | 0.347 | 0.358 | 0.368 | 0.376 | 0.385 | 0.394 | 0.403 | 0.413 | 0.422 | 0.431 | 0.439 | 0.446 | 0.454 | 0.462 | 0.469 | 0.477 | 0.485 | 0.494 | 0.503 | 0.512 | 0.522 | 0.531 | 0.54  | 0.55  | 0.559 | 0.567 | 0.575 | 0.581 | 0.587 | 0.594 |       |
| Hainan                                           | 0.438 | 0.443 | 0.448 | 0.454 | 0.462 | 0.47  | 0.478 | 0.486 | 0.495 | 0.502 | 0.511 | 0.52  | 0.529 | 0.539 | 0.549 | 0.558 | 0.566 | 0.575 | 0.582 | 0.59  | 0.597 | 0.604 | 0.611 | 0.618 | 0.625 | 0.632 | 0.64  | 0.648 | 0.656 | 0.665 | 0.672 | 0.68  | 0.686 | 0.693 | 0.699 | 0.705 | 0.711 |       |
| Hebei                                            | 0.42  | 0.427 | 0.435 | 0.443 | 0.452 | 0.462 | 0.472 | 0.482 | 0.492 | 0.501 | 0.509 | 0.517 | 0.527 | 0.537 | 0.547 | 0.556 | 0.565 | 0.573 | 0.581 | 0.588 | 0.596 | 0.603 | 0.611 | 0.619 | 0.627 | 0.635 | 0.644 | 0.654 | 0.662 | 0.671 | 0.679 | 0.687 | 0.695 | 0.702 | 0.709 | 0.716 | 0.722 |       |
| Heilongjiang                                     | 0.477 | 0.482 | 0.488 | 0.495 | 0.504 | 0.513 | 0.522 | 0.531 | 0.54  | 0.548 | 0.557 | 0.566 | 0.575 | 0.582 | 0.588 | 0.594 | 0.6   | 0.606 | 0.611 | 0.617 | 0.623 | 0.628 | 0.634 | 0.639 | 0.644 | 0.649 | 0.655 | 0.662 | 0.668 | 0.674 | 0.679 | 0.685 | 0.69  | 0.695 | 0.7   | 0.704 | 0.709 |       |
| Henan                                            | 0.368 | 0.375 | 0.384 | 0.394 | 0.405 | 0.417 | 0.429 | 0.441 | 0.453 | 0.463 | 0.471 | 0.481 | 0.491 | 0.502 | 0.513 | 0.525 | 0.535 | 0.545 | 0.556 | 0.562 | 0.57  | 0.578 | 0.587 | 0.595 | 0.604 | 0.613 | 0.623 | 0.633 | 0.643 | 0.652 | 0.661 | 0.67  | 0.678 | 0.685 | 0.693 | 0.699 | 0.706 |       |
| Hubei                                            | 0.407 | 0.415 | 0.423 | 0.432 | 0.442 | 0.452 | 0.463 | 0.474 | 0.484 | 0.494 | 0.504 | 0.514 | 0.524 | 0.535 | 0.545 | 0.553 | 0.561 | 0.569 | 0.576 | 0.583 | 0.59  | 0.597 | 0.604 | 0.611 | 0.618 | 0.626 | 0.635 | 0.643 | 0.651 | 0.659 | 0.667 | 0.674 | 0.681 | 0.688 | 0.694 | 0.7   | 0.706 |       |
| Hunan                                            | 0.383 | 0.391 | 0.399 | 0.409 | 0.42  | 0.431 | 0.442 | 0.454 | 0.465 | 0.476 | 0.485 | 0.495 | 0.505 | 0.516 | 0.526 | 0.536 | 0.546 | 0.555 | 0.562 | 0.569 | 0.576 | 0.582 | 0.59  | 0.597 | 0.605 | 0.613 | 0.621 | 0.63  | 0.639 | 0.647 | 0.655 | 0.663 | 0.67  | 0.678 | 0.684 | 0.691 | 0.697 |       |
| Inner Mongolia                                   | 0.407 | 0.413 | 0.422 | 0.431 | 0.444 | 0.456 | 0.468 | 0.48  | 0.492 | 0.502 | 0.512 | 0.522 | 0.534 | 0.545 | 0.556 | 0.566 | 0.575 | 0.584 | 0.593 | 0.602 | 0.61  | 0.618 | 0.627 | 0.634 | 0.641 | 0.648 | 0.656 | 0.664 | 0.672 | 0.68  | 0.688 | 0.696 | 0.703 | 0.71  | 0.716 | 0.722 | 0.728 |       |
| Jiangsu                                          | 0.443 | 0.451 | 0.459 | 0.468 | 0.479 | 0.489 | 0.5   | 0.51  | 0.521 | 0.53  | 0.539 | 0.548 | 0.557 | 0.565 | 0.573 | 0.582 | 0.591 | 0.599 | 0.607 | 0.614 | 0.621 | 0.629 | 0.637 | 0.646 | 0.655 | 0.664 | 0.674 | 0.684 | 0.693 | 0.702 | 0.711 | 0.72  | 0.728 | 0.736 | 0.743 | 0.75  | 0.757 |       |
| Jiangxi                                          | 0.347 | 0.354 | 0.362 | 0.371 | 0.382 | 0.394 | 0.405 | 0.416 | 0.428 | 0.439 | 0.449 | 0.458 | 0.469 | 0.48  | 0.49  | 0.5   | 0.509 | 0.518 | 0.526 | 0.534 | 0.542 | 0.549 | 0.557 | 0.565 | 0.573 | 0.581 | 0.59  | 0.599 | 0.607 | 0.615 | 0.622 | 0.629 | 0.636 | 0.643 | 0.649 | 0.655 | 0.662 |       |
| Jilin                                            | 0.451 | 0.457 | 0.464 | 0.471 | 0.48  | 0.49  | 0.5   | 0.509 | 0.519 | 0.528 | 0.537 | 0.547 | 0.557 | 0.564 | 0.571 | 0.579 | 0.586 | 0.594 | 0.6   | 0.607 | 0.613 | 0.62  | 0.626 | 0.633 | 0.639 | 0.646 | 0.653 | 0.661 | 0.668 | 0.676 | 0.683 | 0.689 | 0.696 | 0.702 | 0.708 | 0.713 | 0.719 |       |
| Liaoning                                         | 0.521 | 0.527 | 0.533 | 0.539 | 0.547 | 0.555 | 0.563 | 0.571 | 0.579 | 0.587 | 0.592 | 0.597 | 0.602 | 0.608 | 0.614 | 0.621 | 0.627 | 0.634 | 0.639 | 0.645 | 0.651 | 0.656 | 0.662 | 0.668 | 0.674 | 0.68  | 0.686 | 0.693 | 0.7   | 0.707 | 0.713 | 0.719 | 0.725 | 0.73  | 0.736 | 0.741 | 0.746 |       |
| Ningxia                                          | 0.37  | 0.375 | 0.382 | 0.39  | 0.398 | 0.408 | 0.418 | 0.429 | 0.44  | 0.45  | 0.46  | 0.469 | 0.479 | 0.489 | 0.498 | 0.507 | 0.515 | 0.523 | 0.531 | 0.538 | 0.545 | 0.552 | 0.559 | 0.566 | 0.574 | 0.583 | 0.592 | 0.601 | 0.61  | 0.617 | 0.624 | 0.632 | 0.639 | 0.645 | 0.652 | 0.658 | 0.664 |       |
| Qinghai                                          | 0.354 | 0.36  | 0.366 | 0.375 | 0.386 | 0.397 | 0.408 | 0.42  | 0.431 | 0.442 | 0.452 | 0.462 | 0.473 | 0.482 | 0.492 | 0.501 | 0.509 | 0.517 | 0.524 | 0.531 | 0.537 | 0.544 | 0.55  | 0.557 | 0.564 | 0.571 | 0.578 | 0.586 | 0.593 | 0.6   | 0.607 | 0.614 | 0.622 | 0.627 | 0.633 | 0.639 | 0.645 |       |
| Shaanxi                                          | 0.385 | 0.392 | 0.4   | 0.409 | 0.419 | 0.43  | 0.441 | 0.451 | 0.462 | 0.471 | 0.48  | 0.49  | 0.501 | 0.512 | 0.522 | 0.532 | 0.54  | 0.549 | 0.556 | 0.564 | 0.571 | 0.579 | 0.587 | 0.594 | 0.602 | 0.61  | 0.619 | 0.628 | 0.637 | 0.645 | 0.654 | 0.662 | 0.67  | 0.677 | 0.683 | 0.689 | 0.696 |       |
| Shandong                                         | 0.413 | 0.421 | 0.431 | 0.44  | 0.451 | 0.463 | 0.474 | 0.485 | 0.497 | 0.507 | 0.516 | 0.525 | 0.535 | 0.544 | 0.553 | 0.5   |       |       |       |       |       |       |       |       |       |       |       |       |       |       |       |       |       |       |       |       |       |       |

**Appendix Table 14: Socio-Demographic Index values for all estimated GBD 2016 locations, 1980–2016**

| Location            | 1980  | 1981  | 1982  | 1983  | 1984  | 1985  | 1986  | 1987  | 1988  | 1989  | 1990  | 1991  | 1992  | 1993  | 1994  | 1995  | 1996  | 1997  | 1998  | 1999  | 2000  | 2001  | 2002  | 2003  | 2004  | 2005  | 2006  | 2007  | 2008  | 2009  | 2010  | 2011  | 2012  | 2013  | 2014  | 2015  | 2016  |       |
|---------------------|-------|-------|-------|-------|-------|-------|-------|-------|-------|-------|-------|-------|-------|-------|-------|-------|-------|-------|-------|-------|-------|-------|-------|-------|-------|-------|-------|-------|-------|-------|-------|-------|-------|-------|-------|-------|-------|-------|
| Sumatera Barat      | 0.387 | 0.398 | 0.408 | 0.418 | 0.429 | 0.439 | 0.448 | 0.458 | 0.466 | 0.475 | 0.483 | 0.491 | 0.498 | 0.506 | 0.513 | 0.519 | 0.526 | 0.532 | 0.536 | 0.541 | 0.546 | 0.551 | 0.557 | 0.563 | 0.568 | 0.574 | 0.58  | 0.587 | 0.594 | 0.602 | 0.611 | 0.62  | 0.629 | 0.638 | 0.647 | 0.656 | 0.663 |       |
| Riau                | 0.438 | 0.451 | 0.465 | 0.479 | 0.494 | 0.507 | 0.521 | 0.533 | 0.545 | 0.556 | 0.567 | 0.577 | 0.586 | 0.595 | 0.602 | 0.609 | 0.616 | 0.622 | 0.628 | 0.632 | 0.639 | 0.645 | 0.651 | 0.656 | 0.662 | 0.668 | 0.675 | 0.682 | 0.688 | 0.695 | 0.702 | 0.711 | 0.72  | 0.728 | 0.737 | 0.744 |       |       |
| Jambi               | 0.355 | 0.366 | 0.376 | 0.387 | 0.398 | 0.408 | 0.418 | 0.428 | 0.438 | 0.447 | 0.456 | 0.465 | 0.474 | 0.483 | 0.492 | 0.501 | 0.51  | 0.519 | 0.526 | 0.532 | 0.537 | 0.542 | 0.549 | 0.555 | 0.562 | 0.568 | 0.575 | 0.583 | 0.592 | 0.6   | 0.61  | 0.62  | 0.63  | 0.64  | 0.649 | 0.659 | 0.667 |       |
| Sumatera Selatan    | 0.416 | 0.426 | 0.436 | 0.446 | 0.456 | 0.466 | 0.476 | 0.485 | 0.495 | 0.503 | 0.512 | 0.521 | 0.53  | 0.537 | 0.544 | 0.55  | 0.557 | 0.563 | 0.569 | 0.572 | 0.575 | 0.578 | 0.581 | 0.584 | 0.587 | 0.592 | 0.596 | 0.602 | 0.608 | 0.615 | 0.622 | 0.629 | 0.638 | 0.646 | 0.655 | 0.663 | 0.671 |       |
| Bengkulu            | 0.348 | 0.359 | 0.369 | 0.38  | 0.391 | 0.402 | 0.413 | 0.423 | 0.433 | 0.443 | 0.452 | 0.462 | 0.471 | 0.48  | 0.489 | 0.498 | 0.507 | 0.515 | 0.521 | 0.526 | 0.53  | 0.534 | 0.538 | 0.543 | 0.548 | 0.554 | 0.561 | 0.567 | 0.575 | 0.582 | 0.589 | 0.598 | 0.607 | 0.616 | 0.625 | 0.634 | 0.641 |       |
| Lampung             | 0.344 | 0.355 | 0.365 | 0.376 | 0.386 | 0.396 | 0.405 | 0.414 | 0.423 | 0.433 | 0.443 | 0.444 | 0.453 | 0.46  | 0.469 | 0.478 | 0.489 | 0.498 | 0.507 | 0.516 | 0.522 | 0.527 | 0.532 | 0.536 | 0.54  | 0.544 | 0.549 | 0.555 | 0.562 | 0.571 | 0.581 | 0.592 | 0.603 | 0.613 | 0.623 | 0.633 | 0.641 |       |
| Bangka Belitung     | 0.398 | 0.408 | 0.417 | 0.427 | 0.437 | 0.447 | 0.456 | 0.466 | 0.475 | 0.483 | 0.492 | 0.499 | 0.507 | 0.514 | 0.521 | 0.528 | 0.535 | 0.542 | 0.548 | 0.553 | 0.557 | 0.562 | 0.567 | 0.572 | 0.578 | 0.584 | 0.589 | 0.595 | 0.602 | 0.608 | 0.615 | 0.623 | 0.631 | 0.639 | 0.647 | 0.656 | 0.663 |       |
| Kepulauan Riau      | 0.439 | 0.453 | 0.467 | 0.482 | 0.498 | 0.513 | 0.528 | 0.542 | 0.555 | 0.568 | 0.581 | 0.593 | 0.606 | 0.617 | 0.626 | 0.635 | 0.644 | 0.653 | 0.659 | 0.665 | 0.669 | 0.672 | 0.675 | 0.678 | 0.681 | 0.684 | 0.688 | 0.692 | 0.698 | 0.704 | 0.711 | 0.718 | 0.726 | 0.734 | 0.742 | 0.751 | 0.758 |       |
| Kalimantan Utara    | 0.455 | 0.469 | 0.483 | 0.498 | 0.513 | 0.527 | 0.541 | 0.554 | 0.566 | 0.577 | 0.588 | 0.599 | 0.61  | 0.62  | 0.63  | 0.64  | 0.649 | 0.658 | 0.666 | 0.673 | 0.679 | 0.684 | 0.689 | 0.693 | 0.698 | 0.704 | 0.709 | 0.713 | 0.72  | 0.726 | 0.731 | 0.739 | 0.746 | 0.754 | 0.761 | 0.769 | 0.775 |       |
| Jakarta             | 0.554 | 0.566 | 0.576 | 0.587 | 0.599 | 0.609 | 0.619 | 0.629 | 0.638 | 0.646 | 0.654 | 0.663 | 0.67  | 0.68  | 0.689 | 0.697 | 0.706 | 0.714 | 0.72  | 0.725 | 0.73  | 0.735 | 0.74  | 0.745 | 0.75  | 0.754 | 0.759 | 0.764 | 0.769 | 0.775 | 0.782 | 0.789 | 0.795 | 0.803 | 0.81  | 0.818 | 0.824 |       |
| Jawa Barat          | 0.406 | 0.416 | 0.426 | 0.436 | 0.446 | 0.456 | 0.465 | 0.474 | 0.481 | 0.488 | 0.496 | 0.504 | 0.512 | 0.52  | 0.529 | 0.538 | 0.546 | 0.554 | 0.56  | 0.563 | 0.566 | 0.569 | 0.571 | 0.575 | 0.578 | 0.582 | 0.587 | 0.593 | 0.6   | 0.608 | 0.615 | 0.623 | 0.631 | 0.639 | 0.648 | 0.656 | 0.663 |       |
| Jawa Tengah         | 0.363 | 0.374 | 0.384 | 0.395 | 0.405 | 0.415 | 0.425 | 0.433 | 0.442 | 0.449 | 0.457 | 0.466 | 0.476 | 0.483 | 0.492 | 0.5   | 0.508 | 0.516 | 0.521 | 0.526 | 0.529 | 0.533 | 0.536 | 0.54  | 0.545 | 0.549 | 0.555 | 0.561 | 0.568 | 0.575 | 0.582 | 0.591 | 0.599 | 0.608 | 0.616 | 0.625 | 0.632 |       |
| Yogyakarta          | 0.393 | 0.405 | 0.417 | 0.429 | 0.44  | 0.451 | 0.462 | 0.472 | 0.481 | 0.49  | 0.499 | 0.508 | 0.517 | 0.53  | 0.543 | 0.554 | 0.563 | 0.572 | 0.576 | 0.58  | 0.584 | 0.587 | 0.591 | 0.595 | 0.599 | 0.603 | 0.607 | 0.612 | 0.618 | 0.624 | 0.631 | 0.639 | 0.647 | 0.655 | 0.663 | 0.672 | 0.679 |       |
| Jawa Timur          | 0.384 | 0.395 | 0.406 | 0.416 | 0.427 | 0.437 | 0.447 | 0.456 | 0.465 | 0.473 | 0.482 | 0.49  | 0.498 | 0.506 | 0.514 | 0.522 | 0.53  | 0.538 | 0.545 | 0.55  | 0.556 | 0.562 | 0.567 | 0.573 | 0.579 | 0.584 | 0.59  | 0.596 | 0.603 | 0.61  | 0.617 | 0.625 | 0.633 | 0.642 | 0.651 | 0.659 | 0.667 |       |
| Banten              | 0.398 | 0.408 | 0.418 | 0.428 | 0.439 | 0.449 | 0.459 | 0.469 | 0.478 | 0.486 | 0.495 | 0.504 | 0.513 | 0.521 | 0.529 | 0.536 | 0.544 | 0.553 | 0.561 | 0.568 | 0.573 | 0.577 | 0.581 | 0.586 | 0.59  | 0.593 | 0.598 | 0.602 | 0.607 | 0.612 | 0.618 | 0.626 | 0.635 | 0.644 | 0.652 | 0.661 | 0.669 |       |
| Bali                | 0.394 | 0.406 | 0.418 | 0.43  | 0.442 | 0.454 | 0.466 | 0.477 | 0.486 | 0.496 | 0.506 | 0.515 | 0.524 | 0.534 | 0.544 | 0.552 | 0.561 | 0.57  | 0.575 | 0.579 | 0.582 | 0.585 | 0.589 | 0.592 | 0.596 | 0.6   | 0.604 | 0.609 | 0.614 | 0.621 | 0.628 | 0.636 | 0.644 | 0.653 | 0.662 | 0.67  | 0.678 |       |
| Nusa Tenggara Barat | 0.285 | 0.297 | 0.307 | 0.318 | 0.328 | 0.338 | 0.346 | 0.354 | 0.361 | 0.367 | 0.374 | 0.383 | 0.392 | 0.403 | 0.413 | 0.424 | 0.434 | 0.444 | 0.452 | 0.458 | 0.466 | 0.475 | 0.483 | 0.49  | 0.498 | 0.505 | 0.511 | 0.518 | 0.524 | 0.532 | 0.539 | 0.547 | 0.554 | 0.562 | 0.569 | 0.577 | 0.584 |       |
| Nusa Tenggara Timur | 0.301 | 0.311 | 0.319 | 0.327 | 0.335 | 0.343 | 0.351 | 0.359 | 0.366 | 0.373 | 0.381 | 0.388 | 0.395 | 0.402 | 0.409 | 0.415 | 0.42  | 0.426 | 0.427 | 0.427 | 0.429 | 0.432 | 0.436 | 0.439 | 0.443 | 0.447 | 0.451 | 0.457 | 0.463 | 0.47  | 0.479 | 0.488 | 0.497 | 0.507 | 0.516 | 0.525 | 0.534 |       |
| Kalimantan Barat    | 0.319 | 0.33  | 0.341 | 0.353 | 0.365 | 0.377 | 0.388 | 0.398 | 0.408 | 0.419 | 0.429 | 0.439 | 0.45  | 0.461 | 0.472 | 0.483 | 0.494 | 0.505 | 0.517 | 0.525 | 0.535 | 0.543 | 0.553 | 0.558 | 0.564 | 0.569 | 0.575 | 0.581 | 0.589 | 0.596 | 0.604 | 0.612 | 0.62  | 0.629 | 0.637 | 0.646 | 0.654 |       |
| Kalimantan Tengah   | 0.41  | 0.42  | 0.429 | 0.439 | 0.449 | 0.459 | 0.469 | 0.479 | 0.488 | 0.497 | 0.506 | 0.515 | 0.523 | 0.534 | 0.545 | 0.554 | 0.564 | 0.573 | 0.579 | 0.583 | 0.585 | 0.586 | 0.587 | 0.588 | 0.59  | 0.591 | 0.594 | 0.598 | 0.603 | 0.61  | 0.617 | 0.625 | 0.633 | 0.642 | 0.65  | 0.659 | 0.667 |       |
| Kalimantan Selatan  | 0.399 | 0.41  | 0.421 | 0.432 | 0.442 | 0.453 | 0.463 | 0.472 | 0.48  | 0.487 | 0.494 | 0.502 | 0.51  | 0.519 | 0.527 | 0.534 | 0.542 | 0.549 | 0.554 | 0.558 | 0.561 | 0.564 | 0.567 | 0.57  | 0.574 | 0.577 | 0.58  | 0.584 | 0.589 | 0.594 | 0.601 | 0.609 | 0.617 | 0.625 | 0.633 | 0.642 | 0.649 |       |
| Kalimantan Timur    | 0.463 | 0.478 | 0.492 | 0.507 | 0.522 | 0.536 | 0.55  | 0.563 | 0.575 | 0.587 | 0.598 | 0.607 | 0.617 | 0.625 | 0.632 | 0.64  | 0.647 | 0.654 | 0.661 | 0.667 | 0.673 | 0.68  | 0.686 | 0.691 | 0.696 | 0.702 | 0.707 | 0.711 | 0.717 | 0.722 | 0.726 | 0.733 | 0.739 | 0.747 | 0.755 | 0.763 | 0.77  |       |
| Sulawesi Utara      | 0.44  | 0.45  | 0.46  | 0.469 | 0.478 | 0.487 | 0.495 | 0.503 | 0.51  | 0.517 | 0.524 | 0.532 | 0.539 | 0.548 | 0.556 | 0.564 | 0.573 | 0.581 | 0.588 | 0.591 | 0.593 | 0.595 | 0.596 | 0.597 | 0.599 | 0.601 | 0.603 | 0.607 | 0.612 | 0.619 | 0.626 | 0.634 | 0.642 | 0.651 | 0.659 | 0.668 | 0.675 |       |
| Sulawesi Tengah     | 0.363 | 0.373 | 0.383 | 0.392 | 0.402 | 0.411 | 0.42  | 0.429 | 0.437 | 0.444 | 0.452 | 0.46  | 0.468 | 0.476 | 0.485 | 0.493 | 0.502 | 0.509 | 0.516 | 0.523 | 0.527 | 0.533 | 0.538 | 0.542 | 0.547 | 0.551 | 0.555 | 0.559 | 0.565 | 0.572 | 0.579 | 0.588 | 0.597 | 0.606 | 0.616 | 0.625 | 0.633 |       |
| Sulawesi Selatan    | 0.354 | 0.366 | 0.377 | 0.388 | 0.399 | 0.409 | 0.42  | 0.429 | 0.438 | 0.447 | 0.456 | 0.465 | 0.474 | 0.482 | 0.489 | 0.496 | 0.504 | 0.51  | 0.516 | 0.522 | 0.525 | 0.53  | 0.535 | 0.54  | 0.546 | 0.55  | 0.554 | 0.56  | 0.566 | 0.574 | 0.583 | 0.593 | 0.603 | 0.613 | 0.623 | 0.632 | 0.64  |       |
| Sulawesi Tenggara   | 0.327 | 0.339 | 0.35  | 0.361 | 0.373 | 0.384 | 0.395 | 0.405 | 0.414 | 0.423 | 0.432 | 0.442 | 0.45  | 0.458 | 0.465 | 0.473 | 0.48  | 0.487 | 0.494 | 0.503 | 0.508 | 0.513 | 0.519 | 0.525 | 0.531 | 0.537 | 0.544 | 0.552 | 0.561 | 0.57  | 0.58  | 0.589 | 0.599 | 0.608 | 0.617 | 0.625 |       |       |
| Gorontalo           | 0.328 | 0.338 | 0.346 | 0.354 | 0.362 | 0.37  | 0.378 | 0.385 | 0.392 | 0.399 | 0.407 | 0.415 | 0.424 | 0.43  | 0.437 | 0.444 | 0.45  | 0.457 | 0.462 | 0.466 | 0.467 | 0.47  | 0.473 | 0.478 | 0.482 | 0.488 | 0.493 | 0.5   | 0.507 | 0.517 | 0.526 | 0.536 | 0.546 | 0.555 | 0.564 | 0.573 | 0.581 |       |
| Sulawesi Barat      | 0.318 | 0.329 | 0.338 | 0.348 | 0.358 | 0.368 | 0.378 | 0.387 | 0.396 | 0.405 | 0.414 | 0.422 | 0.43  | 0.436 | 0.442 | 0.447 | 0.453 | 0.458 | 0.462 | 0.466 | 0.469 | 0.473 | 0.477 | 0.481 | 0.485 | 0.489 | 0.493 | 0.498 | 0.507 | 0.516 | 0.525 | 0.534 | 0.543 | 0.552 | 0.561 | 0.57  | 0.579 | 0.587 |
| Maluku              | 0.446 | 0.453 | 0.46  | 0.468 | 0.476 | 0.483 | 0.491 | 0.499 | 0.506 | 0.512 | 0.519 | 0.526 | 0.533 | 0.539 | 0.545 | 0.551 | 0.557 | 0.562 | 0.566 | 0.567 | 0.569 | 0.573 | 0.576 | 0.579 | 0.582 | 0.585 | 0.589 | 0.594 | 0.599 | 0.604 | 0.609 | 0.614 | 0.619 | 0.624 | 0.629 | 0.634 | 0.639 | 0.644 |
| Maluku Utara        | 0.364 | 0.374 | 0.383 | 0.393 | 0.404 | 0.414 | 0.423 | 0.432 | 0.441 | 0.449 | 0.458 | 0.467 | 0.476 | 0.483 | 0.491 | 0.498 | 0.506 | 0.514 | 0.518 | 0.523 | 0.524 | 0.524 | 0.523 | 0.521 | 0.518 | 0.515 | 0.511 | 0.508 | 0.507 | 0.51  | 0.515 | 0.522 | 0.531 | 0.541 | 0.552 | 0.562 | 0.571 |       |
| Papua Barat         | 0.413 | 0.425 | 0.436 | 0.448 | 0.461 | 0.472 | 0.484 | 0.495 | 0.505 | 0.515 | 0.525 | 0.534 | 0.543 | 0.55  | 0.558 | 0.565 | 0.572 | 0.578 | 0.582 | 0.585 | 0.587 | 0.589 | 0.59  | 0.592 | 0.594 | 0.596 | 0.598 | 0.601 | 0.607 | 0.615 | 0.626 | 0.643 | 0.657 | 0.671 | 0.683 | 0.695 | 0.706 |       |
| Papua               | 0.442 | 0.45  | 0.457 | 0.465 | 0.474 | 0.481 | 0.488 | 0.494 | 0.5   | 0.505 | 0.51  | 0.516 | 0.522 | 0.529 | 0.534 | 0.    |       |       |       |       |       |       |       |       |       |       |       |       |       |       |       |       |       |       |       |       |       |       |

Appendix Table 14: Socio-Demographic Index values for all estimated GBD 2016 locations, 1980–2016

| Location                 | 1980  | 1981  | 1982  | 1983  | 1984  | 1985  | 1986  | 1987  | 1988  | 1989  | 1990  | 1991  | 1992  | 1993  | 1994  | 1995  | 1996  | 1997  | 1998  | 1999  | 2000  | 2001  | 2002  | 2003  | 2004  | 2005  | 2006  | 2007  | 2008  | 2009  | 2010  | 2011  | 2012  | 2013  | 2014  | 2015  | 2016  |       |
|--------------------------|-------|-------|-------|-------|-------|-------|-------|-------|-------|-------|-------|-------|-------|-------|-------|-------|-------|-------|-------|-------|-------|-------|-------|-------|-------|-------|-------|-------|-------|-------|-------|-------|-------|-------|-------|-------|-------|-------|
| Albania                  | 0.54  | 0.545 | 0.55  | 0.555 | 0.56  | 0.564 | 0.569 | 0.573 | 0.577 | 0.581 | 0.584 | 0.585 | 0.584 | 0.585 | 0.588 | 0.593 | 0.601 | 0.607 | 0.614 | 0.623 | 0.633 | 0.642 | 0.651 | 0.659 | 0.667 | 0.674 | 0.68  | 0.686 | 0.692 | 0.697 | 0.702 | 0.706 | 0.711 | 0.714 | 0.718 | 0.721 | 0.725 |       |
| Bosnia and Herzegovina   | 0.502 | 0.508 | 0.514 | 0.518 | 0.522 | 0.527 | 0.532 | 0.535 | 0.539 | 0.542 | 0.542 | 0.542 | 0.543 | 0.546 | 0.552 | 0.573 | 0.597 | 0.619 | 0.635 | 0.648 | 0.658 | 0.667 | 0.675 | 0.682 | 0.688 | 0.694 | 0.699 | 0.705 | 0.71  | 0.714 | 0.717 | 0.721 | 0.724 | 0.727 | 0.73  | 0.733 |       |       |
| Bulgaria                 | 0.705 | 0.71  | 0.715 | 0.72  | 0.724 | 0.728 | 0.733 | 0.738 | 0.744 | 0.752 | 0.76  | 0.767 | 0.771 | 0.771 | 0.771 | 0.777 | 0.771 | 0.77  | 0.771 | 0.771 | 0.773 | 0.776 | 0.779 | 0.784 | 0.789 | 0.794 | 0.8   | 0.807 | 0.813 | 0.818 | 0.824 | 0.828 | 0.832 | 0.836 | 0.839 | 0.843 | 0.846 |       |
| Croatia                  | 0.746 | 0.751 | 0.755 | 0.759 | 0.763 | 0.767 | 0.772 | 0.775 | 0.779 | 0.782 | 0.786 | 0.789 | 0.788 | 0.785 | 0.782 | 0.779 | 0.779 | 0.785 | 0.79  | 0.793 | 0.797 | 0.801 | 0.806 | 0.811 | 0.815 | 0.819 | 0.824 | 0.828 | 0.833 | 0.836 | 0.838 | 0.841 | 0.843 | 0.845 | 0.846 | 0.848 | 0.85  |       |
| Czech Republic           | 0.786 | 0.79  | 0.793 | 0.796 | 0.798 | 0.8   | 0.803 | 0.805 | 0.807 | 0.81  | 0.812 | 0.816 | 0.82  | 0.826 | 0.829 | 0.83  | 0.832 | 0.834 | 0.835 | 0.837 | 0.839 | 0.842 | 0.844 | 0.847 | 0.85  | 0.853 | 0.856 | 0.86  | 0.863 | 0.866 | 0.869 | 0.871 | 0.873 | 0.875 | 0.878 | 0.88  | 0.881 |       |
| Hungary                  | 0.711 | 0.719 | 0.727 | 0.732 | 0.733 | 0.735 | 0.739 | 0.744 | 0.748 | 0.751 | 0.753 | 0.756 | 0.761 | 0.766 | 0.77  | 0.777 | 0.78  | 0.783 | 0.786 | 0.79  | 0.794 | 0.798 | 0.803 | 0.807 | 0.812 | 0.816 | 0.821 | 0.825 | 0.828 | 0.831 | 0.834 | 0.836 | 0.838 | 0.841 | 0.843 | 0.845 | 0.846 | 0.849 |
| Macedonia                | 0.664 | 0.669 | 0.673 | 0.677 | 0.681 | 0.686 | 0.69  | 0.695 | 0.7   | 0.702 | 0.7   | 0.699 | 0.701 | 0.701 | 0.701 | 0.703 | 0.708 | 0.712 | 0.716 | 0.718 | 0.723 | 0.73  | 0.737 | 0.742 | 0.745 | 0.749 | 0.753 | 0.757 | 0.762 | 0.765 | 0.77  | 0.775 | 0.779 | 0.782 | 0.786 | 0.789 | 0.793 |       |
| Montenegro               | 0.725 | 0.728 | 0.732 | 0.734 | 0.737 | 0.739 | 0.742 | 0.744 | 0.746 | 0.748 | 0.75  | 0.751 | 0.75  | 0.747 | 0.743 | 0.74  | 0.74  | 0.741 | 0.743 | 0.745 | 0.748 | 0.753 | 0.759 | 0.764 | 0.769 | 0.773 | 0.777 | 0.781 | 0.786 | 0.79  | 0.795 | 0.8   | 0.803 | 0.806 | 0.809 | 0.812 | 0.815 |       |
| Poland                   | 0.702 | 0.702 | 0.699 | 0.699 | 0.703 | 0.708 | 0.714 | 0.719 | 0.724 | 0.73  | 0.735 | 0.739 | 0.745 | 0.751 | 0.759 | 0.767 | 0.773 | 0.778 | 0.783 | 0.789 | 0.795 | 0.8   | 0.805 | 0.81  | 0.815 | 0.82  | 0.824 | 0.83  | 0.835 | 0.84  | 0.845 | 0.85  | 0.855 | 0.86  | 0.864 | 0.868 | 0.872 |       |
| Romania                  | 0.661 | 0.672 | 0.684 | 0.688 | 0.687 | 0.688 | 0.689 | 0.695 | 0.703 | 0.715 | 0.731 | 0.738 | 0.738 | 0.739 | 0.74  | 0.742 | 0.744 | 0.747 | 0.749 | 0.751 | 0.755 | 0.759 | 0.764 | 0.769 | 0.774 | 0.78  | 0.786 | 0.794 | 0.802 | 0.808 | 0.813 | 0.818 | 0.822 | 0.827 | 0.83  | 0.833 | 0.838 |       |
| Serbia                   | 0.678 | 0.68  | 0.682 | 0.683 | 0.684 | 0.686 | 0.689 | 0.691 | 0.694 | 0.697 | 0.7   | 0.703 | 0.704 | 0.701 | 0.699 | 0.697 | 0.698 | 0.702 | 0.707 | 0.709 | 0.712 | 0.714 | 0.717 | 0.722 | 0.728 | 0.733 | 0.737 | 0.742 | 0.747 | 0.752 | 0.755 | 0.759 | 0.761 | 0.764 | 0.767 | 0.769 | 0.771 |       |
| Slovakia                 | 0.749 | 0.753 | 0.756 | 0.759 | 0.762 | 0.766 | 0.77  | 0.774 | 0.778 | 0.781 | 0.785 | 0.788 | 0.792 | 0.797 | 0.805 | 0.81  | 0.812 | 0.814 | 0.817 | 0.819 | 0.822 | 0.825 | 0.828 | 0.831 | 0.835 | 0.839 | 0.843 | 0.848 | 0.854 | 0.858 | 0.86  | 0.863 | 0.866 | 0.868 | 0.871 | 0.874 | 0.877 | 0.88  |
| Slovenia                 | 0.766 | 0.774 | 0.782 | 0.789 | 0.793 | 0.797 | 0.801 | 0.803 | 0.808 | 0.813 | 0.813 | 0.813 | 0.812 | 0.812 | 0.813 | 0.815 | 0.817 | 0.82  | 0.823 | 0.827 | 0.831 | 0.835 | 0.839 | 0.843 | 0.847 | 0.851 | 0.856 | 0.86  | 0.863 | 0.866 | 0.869 | 0.871 | 0.873 | 0.875 | 0.878 | 0.88  | 0.881 |       |
| Eastern Europe           | 0.737 | 0.738 | 0.738 | 0.739 | 0.742 | 0.743 | 0.744 | 0.747 | 0.753 | 0.76  | 0.767 | 0.775 | 0.782 | 0.782 | 0.78  | 0.777 | 0.774 | 0.771 | 0.768 | 0.766 | 0.766 | 0.768 | 0.77  | 0.774 | 0.78  | 0.786 | 0.792 | 0.8   | 0.806 | 0.81  | 0.813 | 0.817 | 0.819 | 0.821 | 0.823 | 0.826 | 0.829 |       |
| Belarus                  | 0.703 | 0.706 | 0.708 | 0.711 | 0.713 | 0.716 | 0.719 | 0.723 | 0.727 | 0.733 | 0.738 | 0.743 | 0.748 | 0.751 | 0.752 | 0.748 | 0.744 | 0.742 | 0.741 | 0.74  | 0.741 | 0.744 | 0.747 | 0.752 | 0.758 | 0.765 | 0.772 | 0.78  | 0.788 | 0.795 | 0.8   | 0.805 | 0.81  | 0.814 | 0.818 | 0.822 | 0.826 |       |
| Estonia                  | 0.775 | 0.776 | 0.776 | 0.776 | 0.779 | 0.78  | 0.779 | 0.778 | 0.781 | 0.788 | 0.799 | 0.807 | 0.813 | 0.814 | 0.813 | 0.812 | 0.812 | 0.813 | 0.816 | 0.818 | 0.822 | 0.832 | 0.837 | 0.843 | 0.847 | 0.851 | 0.854 | 0.859 | 0.861 | 0.866 | 0.872 | 0.877 | 0.88  | 0.883 | 0.885 | 0.887 |       |       |
| Latvia                   | 0.759 | 0.759 | 0.758 | 0.758 | 0.759 | 0.76  | 0.762 | 0.765 | 0.77  | 0.776 | 0.783 | 0.789 | 0.793 | 0.794 | 0.79  | 0.786 | 0.783 | 0.781 | 0.781 | 0.783 | 0.785 | 0.79  | 0.795 | 0.801 | 0.808 | 0.815 | 0.822 | 0.831 | 0.837 | 0.841 | 0.843 | 0.847 | 0.85  | 0.851 | 0.851 | 0.851 | 0.851 |       |
| Lithuania                | 0.768 | 0.771 | 0.772 | 0.772 | 0.774 | 0.776 | 0.777 | 0.781 | 0.787 | 0.79  | 0.792 | 0.795 | 0.8   | 0.805 | 0.805 | 0.804 | 0.801 | 0.801 | 0.801 | 0.803 | 0.805 | 0.809 | 0.814 | 0.819 | 0.825 | 0.832 | 0.838 | 0.845 | 0.851 | 0.853 | 0.856 | 0.858 | 0.862 | 0.865 | 0.869 | 0.872 | 0.876 |       |
| Moldova                  | 0.614 | 0.617 | 0.619 | 0.621 | 0.623 | 0.625 | 0.628 | 0.632 | 0.636 | 0.641 | 0.647 | 0.651 | 0.652 | 0.654 | 0.652 | 0.647 | 0.643 | 0.637 | 0.631 | 0.626 | 0.624 | 0.623 | 0.626 | 0.629 | 0.634 | 0.64  | 0.646 | 0.653 | 0.66  | 0.665 | 0.671 | 0.678 | 0.683 | 0.689 | 0.695 | 0.699 | 0.703 |       |
| Russia                   | 0.745 | 0.746 | 0.745 | 0.745 | 0.749 | 0.749 | 0.748 | 0.751 | 0.758 | 0.766 | 0.774 | 0.782 | 0.788 | 0.787 | 0.786 | 0.784 | 0.781 | 0.778 | 0.775 | 0.774 | 0.774 | 0.775 | 0.778 | 0.782 | 0.787 | 0.793 | 0.799 | 0.806 | 0.811 | 0.814 | 0.818 | 0.821 | 0.823 | 0.824 | 0.826 | 0.829 | 0.832 |       |
| Ukraine                  | 0.712 | 0.715 | 0.717 | 0.719 | 0.721 | 0.724 | 0.727 | 0.731 | 0.737 | 0.742 | 0.748 | 0.753 | 0.757 | 0.76  | 0.758 | 0.753 | 0.748 | 0.742 | 0.737 | 0.732 | 0.729 | 0.728 | 0.729 | 0.733 | 0.74  | 0.747 | 0.755 | 0.763 | 0.77  | 0.774 | 0.778 | 0.782 | 0.785 | 0.789 | 0.791 | 0.792 | 0.793 |       |
| High-income              | 0.773 | 0.778 | 0.782 | 0.787 | 0.791 | 0.795 | 0.799 | 0.803 | 0.806 | 0.809 | 0.813 | 0.817 | 0.822 | 0.826 | 0.83  | 0.837 | 0.84  | 0.843 | 0.845 | 0.848 | 0.854 | 0.856 | 0.859 | 0.86  | 0.861 | 0.863 | 0.866 | 0.868 | 0.871 | 0.873 | 0.875 | 0.877 | 0.879 | 0.881 | 0.882 |       |       |       |
| High-income Asia Pacific | 0.745 | 0.75  | 0.756 | 0.763 | 0.769 | 0.775 | 0.781 | 0.787 | 0.793 | 0.799 | 0.805 | 0.809 | 0.816 | 0.821 | 0.826 | 0.831 | 0.835 | 0.839 | 0.844 | 0.847 | 0.849 | 0.851 | 0.854 | 0.856 | 0.859 | 0.861 | 0.864 | 0.867 | 0.868 | 0.871 | 0.873 | 0.875 | 0.877 | 0.879 | 0.882 | 0.884 |       |       |
| Brunei                   | 0.674 | 0.681 | 0.687 | 0.694 | 0.7   | 0.706 | 0.713 | 0.721 | 0.729 | 0.737 | 0.744 | 0.751 | 0.756 | 0.761 | 0.766 | 0.772 | 0.777 | 0.783 | 0.789 | 0.796 | 0.803 | 0.809 | 0.815 | 0.821 | 0.827 | 0.833 | 0.839 | 0.844 | 0.849 | 0.853 | 0.856 | 0.858 | 0.861 | 0.863 | 0.866 | 0.869 | 0.871 |       |
| Japan                    | 0.776 | 0.779 | 0.781 | 0.784 | 0.788 | 0.793 | 0.798 | 0.803 | 0.81  | 0.817 | 0.822 | 0.828 | 0.833 | 0.837 | 0.84  | 0.844 | 0.847 | 0.85  | 0.852 | 0.854 | 0.856 | 0.858 | 0.859 | 0.861 | 0.863 | 0.865 | 0.867 | 0.869 | 0.871 | 0.872 | 0.873 | 0.875 | 0.877 | 0.878 | 0.88  | 0.882 | 0.884 |       |
| South Korea              | 0.618 | 0.631 | 0.649 | 0.669 | 0.684 | 0.693 | 0.704 | 0.714 | 0.723 | 0.732 | 0.738 | 0.744 | 0.753 | 0.764 | 0.772 | 0.781 | 0.791 | 0.8   | 0.805 | 0.81  | 0.816 | 0.821 | 0.826 | 0.831 | 0.835 | 0.84  | 0.845 | 0.849 | 0.853 | 0.857 | 0.861 | 0.864 | 0.868 | 0.871 | 0.874 | 0.878 | 0.881 |       |
| Singapore                | 0.678 | 0.686 | 0.695 | 0.704 | 0.711 | 0.717 | 0.718 | 0.711 | 0.719 | 0.734 | 0.741 | 0.748 | 0.754 | 0.76  | 0.768 | 0.776 | 0.784 | 0.795 | 0.802 | 0.805 | 0.812 | 0.818 | 0.823 | 0.828 | 0.834 | 0.84  | 0.846 | 0.852 | 0.858 | 0.863 | 0.867 | 0.869 | 0.873 | 0.876 | 0.879 | 0.883 | 0.886 |       |
| Hokkaidō                 | 0.771 | 0.775 | 0.778 | 0.78  | 0.784 | 0.79  | 0.794 | 0.799 | 0.804 | 0.809 | 0.813 | 0.818 | 0.822 | 0.826 | 0.83  | 0.833 | 0.836 | 0.839 | 0.841 | 0.843 | 0.845 | 0.847 | 0.848 | 0.85  | 0.852 | 0.853 | 0.855 | 0.857 | 0.859 | 0.86  | 0.861 | 0.862 | 0.864 | 0.866 | 0.867 | 0.869 | 0.87  |       |
| Aomori                   | 0.76  | 0.764 | 0.766 | 0.769 | 0.773 | 0.778 | 0.784 | 0.789 | 0.795 | 0.801 | 0.805 | 0.81  | 0.814 | 0.818 | 0.822 | 0.827 | 0.831 | 0.835 | 0.841 | 0.844 | 0.847 | 0.848 | 0.85  | 0.851 | 0.852 | 0.854 | 0.855 | 0.856 | 0.858 | 0.86  | 0.861 | 0.862 | 0.864 | 0.866 | 0.867 | 0.868 | 0.869 | 0.87  |
| Iwate                    | 0.752 | 0.756 | 0.758 | 0.761 | 0.766 | 0.771 | 0.776 | 0.78  | 0.786 | 0.792 | 0.797 | 0.802 | 0.807 | 0.811 | 0.816 | 0.821 | 0.826 | 0.83  | 0.833 | 0.835 | 0.838 | 0.84  | 0.842 | 0.844 | 0.846 | 0.848 | 0.849 | 0.851 | 0.853 | 0.854 | 0.856 | 0.857 | 0.858 | 0.86  | 0.862 | 0.864 | 0.865 |       |
| Miyagi                   | 0.763 | 0.767 | 0.77  | 0.773 | 0.778 | 0.783 | 0.789 | 0.794 | 0.8   | 0.807 | 0.813 | 0.818 | 0.824 | 0.828 | 0.832 | 0.836 | 0.839 | 0.842 | 0.844 | 0.846 | 0.848 | 0.85  | 0.851 | 0.853 | 0.855 | 0.857 | 0.859 | 0.861 | 0.862 | 0.863 | 0.865 | 0.866 | 0.868 | 0.869 | 0.871 | 0.873 | 0.874 |       |
| Akita                    | 0.759 | 0.763 | 0.766 | 0.769 | 0.773 | 0.778 | 0.782 | 0.787 | 0.792 | 0.798 | 0.802 | 0.806 | 0.811 | 0.815 | 0.819 | 0.823 | 0.828 | 0.832 | 0.834 | 0.836 | 0.    |       |       |       |       |       |       |       |       |       |       |       |       |       |       |       |       |       |



Appendix Table 14: Socio-Demographic Index values for all estimated GBD 2016 locations, 1980–2016

| Location       | 1980  | 1981  | 1982  | 1983  | 1984  | 1985  | 1986  | 1987  | 1988  | 1989  | 1990  | 1991  | 1992  | 1993  | 1994  | 1995  | 1996  | 1997  | 1998  | 1999  | 2000  | 2001  | 2002  | 2003  | 2004  | 2005  | 2006  | 2007  | 2008  | 2009  | 2010  | 2011  | 2012  | 2013  | 2014  | 2015  | 2016  |       |       |
|----------------|-------|-------|-------|-------|-------|-------|-------|-------|-------|-------|-------|-------|-------|-------|-------|-------|-------|-------|-------|-------|-------|-------|-------|-------|-------|-------|-------|-------|-------|-------|-------|-------|-------|-------|-------|-------|-------|-------|-------|
| Tottori        | 0.747 | 0.751 | 0.753 | 0.755 | 0.759 | 0.764 | 0.769 | 0.774 | 0.778 | 0.786 | 0.791 | 0.797 | 0.803 | 0.807 | 0.812 | 0.817 | 0.822 | 0.826 | 0.83  | 0.832 | 0.835 | 0.837 | 0.84  | 0.843 | 0.845 | 0.847 | 0.849 | 0.851 | 0.853 | 0.854 | 0.856 | 0.857 | 0.858 | 0.859 | 0.861 | 0.864 | 0.866 |       |       |
| Shimane        | 0.744 | 0.748 | 0.75  | 0.752 | 0.756 | 0.761 | 0.766 | 0.771 | 0.777 | 0.783 | 0.788 | 0.794 | 0.799 | 0.803 | 0.808 | 0.813 | 0.818 | 0.823 | 0.827 | 0.83  | 0.833 | 0.836 | 0.839 | 0.842 | 0.845 | 0.847 | 0.849 | 0.85  | 0.852 | 0.853 | 0.854 | 0.856 | 0.857 | 0.858 | 0.859 | 0.861 | 0.864 | 0.866 |       |
| Okayama        | 0.762 | 0.765 | 0.767 | 0.769 | 0.773 | 0.779 | 0.784 | 0.79  | 0.797 | 0.804 | 0.809 | 0.815 | 0.82  | 0.825 | 0.83  | 0.835 | 0.839 | 0.843 | 0.845 | 0.847 | 0.849 | 0.851 | 0.853 | 0.855 | 0.857 | 0.859 | 0.861 | 0.863 | 0.865 | 0.866 | 0.867 | 0.869 | 0.871 | 0.872 | 0.874 | 0.876 | 0.878 |       |       |
| Hiroshima      | 0.77  | 0.773 | 0.775 | 0.777 | 0.781 | 0.787 | 0.792 | 0.797 | 0.804 | 0.811 | 0.816 | 0.822 | 0.828 | 0.833 | 0.837 | 0.842 | 0.845 | 0.848 | 0.85  | 0.852 | 0.854 | 0.856 | 0.857 | 0.859 | 0.861 | 0.863 | 0.865 | 0.867 | 0.869 | 0.869 | 0.87  | 0.871 | 0.872 | 0.874 | 0.877 | 0.881 |       |       |       |
| Yamaguchi      | 0.767 | 0.771 | 0.773 | 0.775 | 0.779 | 0.784 | 0.789 | 0.795 | 0.801 | 0.808 | 0.813 | 0.818 | 0.824 | 0.828 | 0.832 | 0.837 | 0.84  | 0.843 | 0.846 | 0.848 | 0.85  | 0.851 | 0.853 | 0.855 | 0.857 | 0.859 | 0.861 | 0.863 | 0.865 | 0.866 | 0.867 | 0.868 | 0.868 | 0.87  | 0.872 | 0.874 | 0.875 | 0.878 |       |
| Tokushima      | 0.762 | 0.765 | 0.768 | 0.77  | 0.774 | 0.78  | 0.785 | 0.79  | 0.796 | 0.803 | 0.808 | 0.814 | 0.82  | 0.824 | 0.828 | 0.832 | 0.835 | 0.838 | 0.841 | 0.843 | 0.845 | 0.847 | 0.849 | 0.85  | 0.852 | 0.854 | 0.856 | 0.858 | 0.86  | 0.861 | 0.862 | 0.864 | 0.866 | 0.867 | 0.869 | 0.871 | 0.873 |       |       |
| Kagawa         | 0.764 | 0.768 | 0.77  | 0.772 | 0.776 | 0.781 | 0.786 | 0.791 | 0.798 | 0.805 | 0.811 | 0.817 | 0.822 | 0.827 | 0.831 | 0.835 | 0.839 | 0.842 | 0.844 | 0.846 | 0.848 | 0.85  | 0.852 | 0.854 | 0.855 | 0.857 | 0.859 | 0.861 | 0.863 | 0.864 | 0.865 | 0.866 | 0.867 | 0.869 | 0.872 | 0.875 |       |       |       |
| Ehime          | 0.757 | 0.761 | 0.764 | 0.767 | 0.771 | 0.776 | 0.781 | 0.786 | 0.792 | 0.799 | 0.804 | 0.809 | 0.815 | 0.819 | 0.823 | 0.828 | 0.832 | 0.835 | 0.837 | 0.839 | 0.841 | 0.843 | 0.845 | 0.847 | 0.849 | 0.851 | 0.852 | 0.855 | 0.856 | 0.857 | 0.859 | 0.861 | 0.862 | 0.864 | 0.866 | 0.867 | 0.869 |       |       |
| Kōchi          | 0.746 | 0.749 | 0.751 | 0.753 | 0.757 | 0.763 | 0.768 | 0.774 | 0.78  | 0.787 | 0.792 | 0.796 | 0.801 | 0.805 | 0.81  | 0.815 | 0.819 | 0.823 | 0.825 | 0.827 | 0.829 | 0.831 | 0.833 | 0.835 | 0.837 | 0.839 | 0.84  | 0.843 | 0.844 | 0.845 | 0.847 | 0.848 | 0.85  | 0.852 | 0.853 | 0.855 | 0.857 |       |       |
| Fukuoka        | 0.769 | 0.773 | 0.775 | 0.777 | 0.782 | 0.787 | 0.792 | 0.798 | 0.804 | 0.811 | 0.816 | 0.822 | 0.826 | 0.83  | 0.834 | 0.837 | 0.841 | 0.844 | 0.846 | 0.848 | 0.85  | 0.852 | 0.853 | 0.855 | 0.857 | 0.859 | 0.861 | 0.863 | 0.865 | 0.866 | 0.867 | 0.869 | 0.87  | 0.872 | 0.874 | 0.876 | 0.877 |       |       |
| Saga           | 0.751 | 0.755 | 0.757 | 0.76  | 0.764 | 0.769 | 0.775 | 0.78  | 0.786 | 0.793 | 0.798 | 0.803 | 0.808 | 0.812 | 0.816 | 0.821 | 0.825 | 0.828 | 0.831 | 0.834 | 0.836 | 0.839 | 0.843 | 0.846 | 0.849 | 0.85  | 0.852 | 0.853 | 0.854 | 0.855 | 0.856 | 0.857 | 0.859 | 0.861 | 0.863 | 0.866 | 0.869 |       |       |
| Nagasaki       | 0.749 | 0.753 | 0.755 | 0.757 | 0.761 | 0.767 | 0.772 | 0.777 | 0.783 | 0.79  | 0.794 | 0.799 | 0.804 | 0.808 | 0.813 | 0.818 | 0.822 | 0.826 | 0.829 | 0.832 | 0.834 | 0.837 | 0.839 | 0.841 | 0.843 | 0.845 | 0.847 | 0.848 | 0.849 | 0.849 | 0.85  | 0.851 | 0.852 | 0.854 | 0.857 | 0.859 |       |       |       |
| Kumamoto       | 0.75  | 0.754 | 0.757 | 0.759 | 0.763 | 0.768 | 0.773 | 0.778 | 0.784 | 0.791 | 0.796 | 0.801 | 0.806 | 0.81  | 0.814 | 0.819 | 0.823 | 0.827 | 0.83  | 0.832 | 0.835 | 0.837 | 0.839 | 0.841 | 0.843 | 0.845 | 0.846 | 0.846 | 0.847 | 0.848 | 0.849 | 0.85  | 0.851 | 0.852 | 0.854 | 0.857 | 0.86  |       |       |
| Ōita           | 0.761 | 0.765 | 0.768 | 0.771 | 0.775 | 0.78  | 0.785 | 0.789 | 0.795 | 0.802 | 0.807 | 0.812 | 0.817 | 0.821 | 0.825 | 0.83  | 0.834 | 0.838 | 0.841 | 0.843 | 0.845 | 0.847 | 0.849 | 0.85  | 0.852 | 0.854 | 0.856 | 0.858 | 0.86  | 0.861 | 0.862 | 0.863 | 0.865 | 0.867 | 0.87  | 0.872 |       |       |       |
| Miyazaki       | 0.749 | 0.752 | 0.755 | 0.757 | 0.762 | 0.767 | 0.773 | 0.778 | 0.784 | 0.79  | 0.795 | 0.799 | 0.804 | 0.808 | 0.812 | 0.816 | 0.821 | 0.825 | 0.828 | 0.831 | 0.833 | 0.836 | 0.839 | 0.841 | 0.844 | 0.845 | 0.845 | 0.846 | 0.846 | 0.847 | 0.847 | 0.848 | 0.849 | 0.85  | 0.853 | 0.855 | 0.858 |       |       |
| Kagoshima      | 0.744 | 0.748 | 0.751 | 0.754 | 0.759 | 0.765 | 0.77  | 0.775 | 0.782 | 0.788 | 0.793 | 0.799 | 0.804 | 0.808 | 0.813 | 0.818 | 0.822 | 0.826 | 0.828 | 0.83  | 0.832 | 0.834 | 0.837 | 0.84  | 0.842 | 0.844 | 0.846 | 0.846 | 0.847 | 0.848 | 0.849 | 0.85  | 0.851 | 0.852 | 0.853 | 0.855 | 0.858 | 0.861 |       |
| Okinawa        | 0.73  | 0.734 | 0.736 | 0.738 | 0.743 | 0.75  | 0.756 | 0.762 | 0.769 | 0.777 | 0.782 | 0.787 | 0.793 | 0.797 | 0.802 | 0.808 | 0.812 | 0.816 | 0.819 | 0.821 | 0.823 | 0.825 | 0.828 | 0.832 | 0.835 | 0.836 | 0.836 | 0.837 | 0.837 | 0.837 | 0.838 | 0.838 | 0.84  | 0.842 | 0.845 | 0.848 |       |       |       |
| Australasia    | 0.787 | 0.79  | 0.793 | 0.796 | 0.799 | 0.802 | 0.805 | 0.808 | 0.811 | 0.813 | 0.815 | 0.818 | 0.821 | 0.824 | 0.828 | 0.832 | 0.836 | 0.839 | 0.843 | 0.846 | 0.849 | 0.853 | 0.856 | 0.858 | 0.86  | 0.862 | 0.861 | 0.861 | 0.864 | 0.867 | 0.87  | 0.872 | 0.875 | 0.88  | 0.884 | 0.887 | 0.889 |       |       |
| Australia      | 0.787 | 0.789 | 0.792 | 0.796 | 0.799 | 0.802 | 0.806 | 0.81  | 0.813 | 0.815 | 0.818 | 0.82  | 0.823 | 0.826 | 0.83  | 0.834 | 0.838 | 0.842 | 0.845 | 0.849 | 0.853 | 0.856 | 0.858 | 0.862 | 0.865 | 0.865 | 0.865 | 0.865 | 0.865 | 0.865 | 0.866 | 0.867 | 0.868 | 0.872 | 0.875 | 0.876 | 0.879 | 0.883 | 0.889 |
| New Zealand    | 0.786 | 0.79  | 0.794 | 0.797 | 0.799 | 0.8   | 0.8   | 0.8   | 0.8   | 0.8   | 0.803 | 0.807 | 0.81  | 0.813 | 0.816 | 0.819 | 0.822 | 0.826 | 0.828 | 0.828 | 0.831 | 0.836 | 0.839 | 0.84  | 0.841 | 0.843 | 0.84  | 0.838 | 0.841 | 0.844 | 0.847 | 0.851 | 0.856 | 0.86  | 0.863 | 0.865 | 0.867 |       |       |
| Western Europe | 0.754 | 0.759 | 0.765 | 0.771 | 0.775 | 0.779 | 0.784 | 0.788 | 0.792 | 0.797 | 0.801 | 0.807 | 0.812 | 0.817 | 0.821 | 0.825 | 0.828 | 0.832 | 0.835 | 0.838 | 0.842 | 0.845 | 0.848 | 0.85  | 0.852 | 0.854 | 0.856 | 0.858 | 0.859 | 0.861 | 0.864 | 0.866 | 0.869 | 0.871 | 0.873 | 0.874 | 0.876 |       |       |
| Andorra        | 0.845 | 0.848 | 0.85  | 0.852 | 0.855 | 0.857 | 0.859 | 0.862 | 0.864 | 0.866 | 0.868 | 0.87  | 0.872 | 0.873 | 0.875 | 0.876 | 0.878 | 0.881 | 0.884 | 0.887 | 0.889 | 0.891 | 0.892 | 0.894 | 0.896 | 0.897 | 0.899 | 0.901 | 0.902 | 0.904 | 0.906 | 0.907 | 0.909 | 0.91  | 0.912 | 0.913 | 0.915 |       |       |
| Austria        | 0.801 | 0.803 | 0.807 | 0.812 | 0.816 | 0.818 | 0.82  | 0.822 | 0.824 | 0.827 | 0.83  | 0.832 | 0.836 | 0.838 | 0.841 | 0.844 | 0.846 | 0.849 | 0.851 | 0.854 | 0.857 | 0.86  | 0.862 | 0.864 | 0.867 | 0.869 | 0.871 | 0.874 | 0.876 | 0.878 | 0.88  | 0.882 | 0.885 | 0.887 | 0.889 | 0.89  | 0.892 |       |       |
| Belgium        | 0.813 | 0.818 | 0.823 | 0.827 | 0.831 | 0.833 | 0.835 | 0.837 | 0.84  | 0.841 | 0.843 | 0.846 | 0.85  | 0.855 | 0.859 | 0.861 | 0.862 | 0.865 | 0.867 | 0.869 | 0.871 | 0.874 | 0.877 | 0.877 | 0.878 | 0.879 | 0.88  | 0.882 | 0.883 | 0.886 | 0.89  | 0.893 | 0.896 | 0.897 | 0.898 | 0.899 |       |       |       |
| Cyprus         | 0.692 | 0.696 | 0.699 | 0.704 | 0.712 | 0.72  | 0.726 | 0.73  | 0.734 | 0.739 | 0.745 | 0.748 | 0.754 | 0.765 | 0.774 | 0.783 | 0.79  | 0.798 | 0.806 | 0.812 | 0.819 | 0.826 | 0.831 | 0.835 | 0.839 | 0.843 | 0.847 | 0.852 | 0.856 | 0.86  | 0.863 | 0.868 | 0.869 | 0.87  | 0.871 | 0.872 |       |       |       |
| Denmark        | 0.866 | 0.867 | 0.869 | 0.871 | 0.873 | 0.876 | 0.879 | 0.88  | 0.88  | 0.88  | 0.888 | 0.89  | 0.893 | 0.895 | 0.897 | 0.9   | 0.903 | 0.906 | 0.908 | 0.909 | 0.91  | 0.912 | 0.913 | 0.915 | 0.917 | 0.919 | 0.921 | 0.922 | 0.924 | 0.928 | 0.929 | 0.932 | 0.934 | 0.935 | 0.936 |       |       |       |       |
| Finland        | 0.815 | 0.816 | 0.818 | 0.821 | 0.826 | 0.832 | 0.836 | 0.837 | 0.838 | 0.84  | 0.841 | 0.841 | 0.842 | 0.843 | 0.845 | 0.849 | 0.852 | 0.856 | 0.86  | 0.863 | 0.867 | 0.871 | 0.874 | 0.876 | 0.878 | 0.88  | 0.883 | 0.886 | 0.888 | 0.89  | 0.892 | 0.896 | 0.9   | 0.904 | 0.906 | 0.907 | 0.907 |       |       |
| France         | 0.743 | 0.749 | 0.758 | 0.765 | 0.769 | 0.773 | 0.777 | 0.783 | 0.788 | 0.793 | 0.799 | 0.805 | 0.812 | 0.817 | 0.821 | 0.823 | 0.826 | 0.829 | 0.832 | 0.833 | 0.836 | 0.84  | 0.843 | 0.846 | 0.848 | 0.849 | 0.85  | 0.853 | 0.855 | 0.856 | 0.858 | 0.861 | 0.863 | 0.865 | 0.867 | 0.868 | 0.869 |       |       |
| Germany        | 0.801 | 0.804 | 0.807 | 0.809 | 0.812 | 0.814 | 0.817 | 0.82  | 0.822 | 0.825 | 0.828 | 0.832 | 0.835 | 0.838 | 0.841 | 0.843 | 0.845 | 0.847 | 0.85  | 0.852 | 0.854 | 0.857 | 0.859 | 0.86  | 0.862 | 0.864 | 0.866 | 0.869 | 0.871 | 0.873 | 0.875 | 0.877 | 0.88  | 0.882 | 0.884 | 0.886 | 0.889 |       |       |
| Greece         | 0.699 | 0.708 | 0.714 | 0.722 | 0.731 | 0.739 | 0.745 | 0.751 | 0.756 | 0.761 | 0.765 | 0.77  | 0.775 | 0.779 | 0.783 | 0.787 | 0.792 | 0.796 | 0.801 | 0.806 | 0.81  | 0.815 | 0.82  | 0.825 | 0.829 | 0.834 | 0.838 | 0.843 | 0.847 | 0.85  | 0.852 | 0.853 | 0.853 | 0.852 | 0.852 | 0.852 | 0.853 |       |       |
| Iceland        | 0.808 | 0.817 | 0.823 | 0.83  | 0.841 | 0.848 | 0.847 | 0.842 | 0.842 | 0.844 | 0.847 | 0.852 | 0.852 | 0.855 | 0.856 | 0.862 | 0.865 | 0.869 | 0.873 | 0.875 | 0.879 | 0.883 | 0.888 | 0.889 | 0.892 | 0.894 | 0.895 | 0.894 | 0.894 | 0.901 | 0.906 | 0.909 | 0.914 | 0.918 | 0.92  | 0.921 |       |       |       |
| Ireland        | 0.684 | 0.694 | 0.705 | 0.717 | 0.727 | 0.733 | 0.74  | 0.75  | 0.759 | 0.764 | 0.768 | 0.775 | 0.784 | 0.792 | 0.806 | 0.811 | 0.818 | 0.826 | 0.832 | 0.836 | 0.8   |       |       |       |       |       |       |       |       |       |       |       |       |       |       |       |       |       |       |

Appendix Table 14: Socio-Demographic Index values for all estimated GBD 2016 locations, 1980–2016

| Location                  | 1980  | 1981  | 1982  | 1983  | 1984  | 1985  | 1986  | 1987  | 1988  | 1989  | 1990  | 1991  | 1992  | 1993  | 1994  | 1995  | 1996  | 1997  | 1998  | 1999  | 2000  | 2001  | 2002  | 2003  | 2004  | 2005  | 2006  | 2007  | 2008  | 2009  | 2010  | 2011  | 2012  | 2013  | 2014  | 2015  | 2016  |
|---------------------------|-------|-------|-------|-------|-------|-------|-------|-------|-------|-------|-------|-------|-------|-------|-------|-------|-------|-------|-------|-------|-------|-------|-------|-------|-------|-------|-------|-------|-------|-------|-------|-------|-------|-------|-------|-------|-------|
| Middlesbrough             | 0.668 | 0.674 | 0.68  | 0.686 | 0.69  | 0.695 | 0.699 | 0.705 | 0.713 | 0.72  | 0.727 | 0.735 | 0.741 | 0.748 | 0.755 | 0.761 | 0.767 | 0.772 | 0.778 | 0.785 | 0.791 | 0.794 | 0.795 | 0.795 | 0.8   | 0.804 | 0.808 | 0.813 | 0.816 | 0.817 | 0.818 | 0.819 | 0.821 | 0.824 | 0.826 | 0.827 | 0.829 |
| South Tyneside            | 0.657 | 0.662 | 0.666 | 0.669 | 0.672 | 0.675 | 0.68  | 0.686 | 0.694 | 0.701 | 0.707 | 0.713 | 0.719 | 0.725 | 0.731 | 0.736 | 0.741 | 0.746 | 0.753 | 0.761 | 0.768 | 0.775 | 0.78  | 0.784 | 0.789 | 0.793 | 0.796 | 0.799 | 0.802 | 0.803 | 0.805 | 0.807 | 0.81  | 0.814 | 0.816 | 0.818 | 0.82  |
| Sunderland                | 0.676 | 0.683 | 0.689 | 0.694 | 0.7   | 0.706 | 0.712 | 0.718 | 0.725 | 0.731 | 0.736 | 0.742 | 0.748 | 0.754 | 0.761 | 0.767 | 0.772 | 0.778 | 0.785 | 0.791 | 0.798 | 0.804 | 0.809 | 0.812 | 0.816 | 0.82  | 0.823 | 0.826 | 0.829 | 0.83  | 0.831 | 0.832 | 0.833 | 0.838 | 0.841 | 0.844 | 0.845 |
| Hartlepool                | 0.672 | 0.678 | 0.683 | 0.687 | 0.691 | 0.695 | 0.7   | 0.704 | 0.711 | 0.718 | 0.723 | 0.728 | 0.734 | 0.74  | 0.746 | 0.753 | 0.759 | 0.765 | 0.77  | 0.777 | 0.782 | 0.785 | 0.787 | 0.788 | 0.79  | 0.793 | 0.795 | 0.799 | 0.802 | 0.805 | 0.807 | 0.81  | 0.814 | 0.819 | 0.82  | 0.821 | 0.821 |
| Cheshire East             | 0.726 | 0.732 | 0.737 | 0.742 | 0.747 | 0.753 | 0.758 | 0.764 | 0.769 | 0.774 | 0.778 | 0.783 | 0.788 | 0.795 | 0.802 | 0.809 | 0.815 | 0.821 | 0.826 | 0.832 | 0.837 | 0.842 | 0.845 | 0.845 | 0.847 | 0.848 | 0.848 | 0.847 | 0.848 | 0.851 | 0.854 | 0.858 | 0.863 | 0.869 | 0.872 | 0.873 | 0.874 |
| Stockport                 | 0.702 | 0.708 | 0.714 | 0.719 | 0.724 | 0.73  | 0.734 | 0.74  | 0.747 | 0.753 | 0.757 | 0.763 | 0.77  | 0.778 | 0.784 | 0.789 | 0.794 | 0.8   | 0.806 | 0.813 | 0.82  | 0.825 | 0.828 | 0.829 | 0.831 | 0.833 | 0.835 | 0.836 | 0.837 | 0.838 | 0.839 | 0.841 | 0.844 | 0.849 | 0.853 | 0.855 | 0.857 |
| Trafford                  | 0.726 | 0.732 | 0.737 | 0.741 | 0.745 | 0.75  | 0.755 | 0.76  | 0.767 | 0.772 | 0.777 | 0.784 | 0.791 | 0.799 | 0.806 | 0.812 | 0.816 | 0.821 | 0.828 | 0.835 | 0.841 | 0.846 | 0.849 | 0.851 | 0.854 | 0.855 | 0.855 | 0.856 | 0.858 | 0.86  | 0.864 | 0.868 | 0.872 | 0.877 | 0.88  | 0.882 | 0.883 |
| Cheshire West and Chester | 0.714 | 0.72  | 0.726 | 0.731 | 0.736 | 0.741 | 0.747 | 0.751 | 0.756 | 0.761 | 0.766 | 0.773 | 0.78  | 0.787 | 0.792 | 0.795 | 0.796 | 0.799 | 0.803 | 0.812 | 0.822 | 0.831 | 0.837 | 0.839 | 0.841 | 0.843 | 0.845 | 0.846 | 0.847 | 0.849 | 0.852 | 0.857 | 0.862 | 0.866 | 0.868 | 0.869 | 0.869 |
| Sefton                    | 0.682 | 0.688 | 0.693 | 0.698 | 0.704 | 0.709 | 0.715 | 0.72  | 0.725 | 0.73  | 0.734 | 0.74  | 0.747 | 0.754 | 0.761 | 0.767 | 0.771 | 0.777 | 0.783 | 0.789 | 0.795 | 0.8   | 0.803 | 0.805 | 0.809 | 0.811 | 0.812 | 0.813 | 0.814 | 0.816 | 0.818 | 0.82  | 0.823 | 0.824 | 0.825 | 0.826 |       |
| Lancashire                | 0.694 | 0.7   | 0.705 | 0.711 | 0.716 | 0.721 | 0.727 | 0.732 | 0.738 | 0.744 | 0.749 | 0.755 | 0.761 | 0.768 | 0.775 | 0.781 | 0.786 | 0.792 | 0.798 | 0.804 | 0.81  | 0.815 | 0.817 | 0.819 | 0.822 | 0.824 | 0.826 | 0.827 | 0.829 | 0.83  | 0.832 | 0.834 | 0.838 | 0.842 | 0.845 | 0.847 | 0.848 |
| Cumbria                   | 0.702 | 0.707 | 0.713 | 0.718 | 0.723 | 0.73  | 0.736 | 0.741 | 0.747 | 0.751 | 0.754 | 0.757 | 0.763 | 0.77  | 0.777 | 0.783 | 0.789 | 0.794 | 0.8   | 0.804 | 0.809 | 0.812 | 0.814 | 0.815 | 0.818 | 0.82  | 0.821 | 0.821 | 0.823 | 0.825 | 0.828 | 0.832 | 0.837 | 0.842 | 0.845 | 0.846 | 0.848 |
| Bolton                    | 0.678 | 0.684 | 0.69  | 0.695 | 0.701 | 0.707 | 0.713 | 0.719 | 0.725 | 0.73  | 0.735 | 0.741 | 0.747 | 0.754 | 0.761 | 0.766 | 0.77  | 0.774 | 0.78  | 0.786 | 0.791 | 0.795 | 0.797 | 0.798 | 0.8   | 0.8   | 0.8   | 0.8   | 0.802 | 0.804 | 0.807 | 0.81  | 0.814 | 0.819 | 0.821 | 0.823 | 0.824 |
| Wirral                    | 0.677 | 0.682 | 0.687 | 0.692 | 0.696 | 0.7   | 0.705 | 0.71  | 0.716 | 0.722 | 0.727 | 0.733 | 0.739 | 0.746 | 0.753 | 0.76  | 0.765 | 0.771 | 0.777 | 0.783 | 0.787 | 0.79  | 0.791 | 0.792 | 0.795 | 0.797 | 0.798 | 0.798 | 0.799 | 0.8   | 0.803 | 0.808 | 0.812 | 0.817 | 0.819 | 0.82  | 0.82  |
| Bury                      | 0.683 | 0.688 | 0.693 | 0.697 | 0.7   | 0.704 | 0.709 | 0.714 | 0.72  | 0.727 | 0.733 | 0.739 | 0.747 | 0.754 | 0.761 | 0.766 | 0.77  | 0.774 | 0.78  | 0.787 | 0.793 | 0.797 | 0.799 | 0.8   | 0.803 | 0.806 | 0.807 | 0.806 | 0.806 | 0.805 | 0.808 | 0.812 | 0.818 | 0.824 | 0.828 | 0.83  | 0.831 |
| St Helens                 | 0.67  | 0.675 | 0.681 | 0.686 | 0.691 | 0.697 | 0.703 | 0.709 | 0.715 | 0.72  | 0.727 | 0.733 | 0.739 | 0.745 | 0.75  | 0.755 | 0.76  | 0.766 | 0.772 | 0.78  | 0.786 | 0.79  | 0.792 | 0.796 | 0.799 | 0.801 | 0.804 | 0.806 | 0.808 | 0.81  | 0.812 | 0.816 | 0.822 | 0.826 | 0.828 | 0.83  | 0.831 |
| Warrington                | 0.719 | 0.724 | 0.73  | 0.735 | 0.741 | 0.747 | 0.753 | 0.759 | 0.766 | 0.771 | 0.774 | 0.777 | 0.783 | 0.789 | 0.796 | 0.802 | 0.807 | 0.812 | 0.817 | 0.824 | 0.83  | 0.836 | 0.841 | 0.844 | 0.847 | 0.85  | 0.852 | 0.852 | 0.852 | 0.854 | 0.858 | 0.862 | 0.867 | 0.873 | 0.875 | 0.877 | 0.878 |
| Oldham                    | 0.669 | 0.674 | 0.679 | 0.684 | 0.689 | 0.694 | 0.699 | 0.704 | 0.71  | 0.715 | 0.72  | 0.725 | 0.731 | 0.738 | 0.743 | 0.747 | 0.751 | 0.754 | 0.758 | 0.763 | 0.769 | 0.773 | 0.775 | 0.776 | 0.778 | 0.78  | 0.782 | 0.784 | 0.787 | 0.789 | 0.792 | 0.796 | 0.8   | 0.804 | 0.806 | 0.807 | 0.808 |
| Rochdale                  | 0.668 | 0.673 | 0.679 | 0.684 | 0.688 | 0.694 | 0.7   | 0.705 | 0.712 | 0.716 | 0.72  | 0.725 | 0.731 | 0.737 | 0.744 | 0.75  | 0.755 | 0.76  | 0.767 | 0.773 | 0.779 | 0.783 | 0.784 | 0.785 | 0.787 | 0.788 | 0.788 | 0.788 | 0.789 | 0.791 | 0.795 | 0.8   | 0.805 | 0.81  | 0.813 | 0.814 | 0.814 |
| Wigan                     | 0.671 | 0.676 | 0.682 | 0.687 | 0.692 | 0.698 | 0.704 | 0.71  | 0.716 | 0.722 | 0.727 | 0.733 | 0.739 | 0.746 | 0.752 | 0.758 | 0.763 | 0.769 | 0.774 | 0.779 | 0.785 | 0.789 | 0.791 | 0.793 | 0.795 | 0.797 | 0.798 | 0.799 | 0.8   | 0.801 | 0.804 | 0.807 | 0.811 | 0.816 | 0.82  | 0.822 | 0.824 |
| Halton                    | 0.69  | 0.695 | 0.7   | 0.704 | 0.707 | 0.711 | 0.715 | 0.72  | 0.727 | 0.734 | 0.739 | 0.745 | 0.752 | 0.759 | 0.767 | 0.773 | 0.778 | 0.782 | 0.786 | 0.792 | 0.8   | 0.806 | 0.81  | 0.811 | 0.812 | 0.814 | 0.816 | 0.818 | 0.82  | 0.822 | 0.827 | 0.832 | 0.836 | 0.842 | 0.847 | 0.85  | 0.853 |
| Liverpool                 | 0.688 | 0.693 | 0.698 | 0.702 | 0.705 | 0.709 | 0.712 | 0.716 | 0.722 | 0.729 | 0.738 | 0.75  | 0.76  | 0.767 | 0.773 | 0.777 | 0.781 | 0.787 | 0.794 | 0.803 | 0.812 | 0.818 | 0.824 | 0.83  | 0.836 | 0.839 | 0.842 | 0.844 | 0.848 | 0.852 | 0.855 | 0.859 | 0.862 | 0.865 | 0.867 | 0.868 | 0.87  |
| Tameside                  | 0.672 | 0.678 | 0.683 | 0.688 | 0.692 | 0.697 | 0.702 | 0.707 | 0.713 | 0.719 | 0.724 | 0.73  | 0.737 | 0.744 | 0.751 | 0.756 | 0.761 | 0.766 | 0.771 | 0.778 | 0.786 | 0.792 | 0.795 | 0.797 | 0.8   | 0.802 | 0.801 | 0.801 | 0.8   | 0.8   | 0.802 | 0.805 | 0.809 | 0.813 | 0.816 | 0.818 | 0.82  |
| Salford                   | 0.691 | 0.696 | 0.701 | 0.706 | 0.71  | 0.714 | 0.719 | 0.723 | 0.728 | 0.732 | 0.737 | 0.744 | 0.752 | 0.761 | 0.769 | 0.775 | 0.78  | 0.784 | 0.791 | 0.799 | 0.807 | 0.814 | 0.818 | 0.821 | 0.825 | 0.828 | 0.831 | 0.832 | 0.834 | 0.835 | 0.839 | 0.843 | 0.848 | 0.853 | 0.856 | 0.859 | 0.861 |
| Blackburn with Darwen     | 0.669 | 0.675 | 0.68  | 0.685 | 0.689 | 0.694 | 0.698 | 0.702 | 0.709 | 0.715 | 0.72  | 0.726 | 0.733 | 0.739 | 0.745 | 0.75  | 0.755 | 0.76  | 0.765 | 0.77  | 0.775 | 0.779 | 0.781 | 0.782 | 0.784 | 0.786 | 0.786 | 0.787 | 0.791 | 0.794 | 0.798 | 0.802 | 0.807 | 0.812 | 0.816 | 0.818 | 0.82  |
| Knowsley                  | 0.665 | 0.672 | 0.678 | 0.683 | 0.689 | 0.694 | 0.7   | 0.704 | 0.71  | 0.715 | 0.72  | 0.727 | 0.733 | 0.739 | 0.744 | 0.75  | 0.755 | 0.762 | 0.768 | 0.774 | 0.781 | 0.787 | 0.791 | 0.792 | 0.795 | 0.799 | 0.803 | 0.807 | 0.811 | 0.813 | 0.816 | 0.819 | 0.822 | 0.828 | 0.832 | 0.834 | 0.837 |
| Blackpool                 | 0.667 | 0.673 | 0.679 | 0.685 | 0.688 | 0.69  | 0.691 | 0.693 | 0.699 | 0.704 | 0.711 | 0.722 | 0.732 | 0.74  | 0.746 | 0.751 | 0.754 | 0.759 | 0.766 | 0.773 | 0.778 | 0.782 | 0.786 | 0.788 | 0.788 | 0.788 | 0.788 | 0.788 | 0.787 | 0.788 | 0.792 | 0.796 | 0.799 | 0.801 | 0.803 | 0.806 | 0.809 |
| Manchester                | 0.715 | 0.721 | 0.726 | 0.731 | 0.734 | 0.739 | 0.744 | 0.749 | 0.755 | 0.761 | 0.768 | 0.775 | 0.781 | 0.789 | 0.796 | 0.801 | 0.806 | 0.812 | 0.819 | 0.829 | 0.839 | 0.847 | 0.853 | 0.857 | 0.862 | 0.866 | 0.869 | 0.872 | 0.875 | 0.878 | 0.882 | 0.884 | 0.888 | 0.892 | 0.895 | 0.897 | 0.899 |
| North Yorkshire           | 0.707 | 0.712 | 0.718 | 0.724 | 0.73  | 0.736 | 0.742 | 0.747 | 0.754 | 0.759 | 0.762 | 0.765 | 0.769 | 0.774 | 0.78  | 0.785 | 0.79  | 0.796 | 0.802 | 0.808 | 0.815 | 0.819 | 0.821 | 0.822 | 0.826 | 0.829 | 0.831 | 0.833 | 0.834 | 0.835 | 0.838 | 0.841 | 0.844 | 0.848 | 0.849 | 0.849 | 0.85  |
| East Riding of Yorkshire  | 0.696 | 0.702 | 0.708 | 0.714 | 0.72  | 0.726 | 0.732 | 0.738 | 0.746 | 0.752 | 0.758 | 0.765 | 0.771 | 0.777 | 0.782 | 0.788 | 0.793 | 0.799 | 0.804 | 0.809 | 0.81  | 0.811 | 0.811 | 0.811 | 0.812 | 0.813 | 0.813 | 0.813 | 0.813 | 0.813 | 0.813 | 0.813 | 0.813 | 0.813 | 0.813 | 0.813 | 0.813 |
| York                      | 0.729 | 0.735 | 0.74  | 0.745 | 0.749 | 0.753 | 0.756 | 0.76  | 0.766 | 0.773 | 0.781 | 0.79  | 0.799 | 0.804 | 0.81  | 0.815 | 0.819 | 0.824 | 0.831 | 0.836 | 0.842 | 0.848 | 0.854 | 0.86  | 0.865 | 0.87  | 0.873 | 0.877 | 0.88  | 0.881 | 0.883 | 0.885 | 0.886 | 0.888 | 0.89  | 0.892 | 0.894 |
| North East Lincolnshire   | 0.693 | 0.698 | 0.703 | 0.706 | 0.709 | 0.714 | 0.721 | 0.728 | 0.736 | 0.74  | 0.743 | 0.748 | 0.755 | 0.762 | 0.769 | 0.773 | 0.776 | 0.779 | 0.784 | 0.789 | 0.795 | 0.801 | 0.802 | 0.803 | 0.805 | 0.808 | 0.813 | 0.817 | 0.822 | 0.825 | 0.828 | 0.831 | 0.833 | 0.834 | 0.834 | 0.834 | 0.834 |
| Calderdale                | 0.688 | 0.694 | 0.699 | 0.704 | 0.709 | 0.716 | 0.722 | 0.729 | 0.736 | 0.741 | 0.746 | 0.75  | 0.755 | 0.761 | 0.767 | 0.773 | 0.777 | 0.783 |       |       |       |       |       |       |       |       |       |       |       |       |       |       |       |       |       |       |       |

Appendix Table 14: Socio-Demographic Index values for all estimated GBD 2016 locations, 1980–2016

| Location               | 1980  | 1981  | 1982  | 1983  | 1984  | 1985  | 1986  | 1987  | 1988  | 1989  | 1990  | 1991  | 1992  | 1993  | 1994  | 1995  | 1996  | 1997  | 1998  | 1999  | 2000  | 2001  | 2002  | 2003  | 2004  | 2005  | 2006  | 2007  | 2008  | 2009  | 2010  | 2011  | 2012  | 2013  | 2014  | 2015  | 2016  |       |       |
|------------------------|-------|-------|-------|-------|-------|-------|-------|-------|-------|-------|-------|-------|-------|-------|-------|-------|-------|-------|-------|-------|-------|-------|-------|-------|-------|-------|-------|-------|-------|-------|-------|-------|-------|-------|-------|-------|-------|-------|-------|
| Dudley                 | 0.677 | 0.682 | 0.688 | 0.693 | 0.698 | 0.703 | 0.708 | 0.714 | 0.721 | 0.726 | 0.731 | 0.736 | 0.741 | 0.747 | 0.753 | 0.757 | 0.762 | 0.767 | 0.772 | 0.778 | 0.784 | 0.789 | 0.792 | 0.794 | 0.797 | 0.8   | 0.802 | 0.804 | 0.806 | 0.806 | 0.807 | 0.808 | 0.81  | 0.814 | 0.816 | 0.817 | 0.818 |       |       |
| Coventry               | 0.697 | 0.702 | 0.707 | 0.711 | 0.715 | 0.719 | 0.724 | 0.729 | 0.735 | 0.742 | 0.75  | 0.757 | 0.764 | 0.771 | 0.777 | 0.782 | 0.787 | 0.792 | 0.797 | 0.803 | 0.812 | 0.819 | 0.823 | 0.826 | 0.83  | 0.833 | 0.835 | 0.836 | 0.837 | 0.838 | 0.84  | 0.843 | 0.848 | 0.855 | 0.86  | 0.863 | 0.866 |       |       |
| Telford and Wrekin     | 0.698 | 0.704 | 0.71  | 0.716 | 0.721 | 0.726 | 0.731 | 0.736 | 0.742 | 0.747 | 0.752 | 0.757 | 0.763 | 0.769 | 0.775 | 0.78  | 0.785 | 0.792 | 0.798 | 0.804 | 0.81  | 0.815 | 0.817 | 0.818 | 0.818 | 0.818 | 0.818 | 0.818 | 0.821 | 0.822 | 0.824 | 0.828 | 0.833 | 0.838 | 0.842 | 0.845 | 0.846 |       |       |
| Stoke-on-Trent         | 0.67  | 0.676 | 0.681 | 0.686 | 0.691 | 0.697 | 0.701 | 0.705 | 0.71  | 0.716 | 0.724 | 0.733 | 0.742 | 0.749 | 0.756 | 0.761 | 0.766 | 0.772 | 0.777 | 0.783 | 0.788 | 0.79  | 0.789 | 0.788 | 0.789 | 0.791 | 0.791 | 0.79  | 0.793 | 0.796 | 0.8   | 0.804 | 0.809 | 0.815 | 0.819 | 0.823 | 0.827 |       |       |
| Walsall                | 0.667 | 0.672 | 0.677 | 0.682 | 0.686 | 0.691 | 0.697 | 0.702 | 0.709 | 0.714 | 0.718 | 0.722 | 0.728 | 0.735 | 0.741 | 0.744 | 0.746 | 0.747 | 0.752 | 0.759 | 0.766 | 0.771 | 0.773 | 0.773 | 0.776 | 0.781 | 0.784 | 0.786 | 0.788 | 0.789 | 0.792 | 0.796 | 0.8   | 0.804 | 0.809 | 0.815 | 0.819 | 0.823 |       |
| Wolverhampton          | 0.678 | 0.684 | 0.689 | 0.693 | 0.698 | 0.703 | 0.707 | 0.712 | 0.717 | 0.723 | 0.728 | 0.734 | 0.741 | 0.747 | 0.753 | 0.757 | 0.761 | 0.766 | 0.772 | 0.778 | 0.783 | 0.788 | 0.795 | 0.799 | 0.8   | 0.803 | 0.806 | 0.807 | 0.808 | 0.809 | 0.81  | 0.813 | 0.816 | 0.82  | 0.825 | 0.827 | 0.829 | 0.83  |       |
| Birmingham             | 0.68  | 0.686 | 0.691 | 0.696 | 0.7   | 0.705 | 0.71  | 0.714 | 0.72  | 0.727 | 0.733 | 0.742 | 0.75  | 0.757 | 0.763 | 0.767 | 0.771 | 0.775 | 0.781 | 0.788 | 0.795 | 0.801 | 0.805 | 0.808 | 0.812 | 0.817 | 0.819 | 0.822 | 0.826 | 0.829 | 0.832 | 0.833 | 0.836 | 0.84  | 0.843 | 0.845 | 0.847 |       |       |
| Sandwell               | 0.666 | 0.671 | 0.677 | 0.682 | 0.686 | 0.691 | 0.696 | 0.701 | 0.708 | 0.714 | 0.719 | 0.725 | 0.732 | 0.739 | 0.745 | 0.749 | 0.753 | 0.758 | 0.763 | 0.768 | 0.773 | 0.778 | 0.781 | 0.782 | 0.785 | 0.787 | 0.788 | 0.789 | 0.79  | 0.791 | 0.794 | 0.797 | 0.803 | 0.808 | 0.812 | 0.813 | 0.815 |       |       |
| Bedford                | 0.711 | 0.717 | 0.723 | 0.728 | 0.733 | 0.739 | 0.745 | 0.75  | 0.757 | 0.764 | 0.771 | 0.776 | 0.781 | 0.784 | 0.788 | 0.791 | 0.795 | 0.801 | 0.807 | 0.814 | 0.822 | 0.828 | 0.831 | 0.833 | 0.836 | 0.839 | 0.841 | 0.842 | 0.843 | 0.844 | 0.845 | 0.846 | 0.848 | 0.85  | 0.851 | 0.851 |       |       |       |
| Central Bedfordshire   | 0.709 | 0.715 | 0.72  | 0.725 | 0.73  | 0.735 | 0.741 | 0.747 | 0.754 | 0.759 | 0.765 | 0.77  | 0.775 | 0.781 | 0.788 | 0.794 | 0.8   | 0.806 | 0.811 | 0.815 | 0.818 | 0.82  | 0.822 | 0.823 | 0.827 | 0.829 | 0.83  | 0.831 | 0.831 | 0.831 | 0.832 | 0.834 | 0.838 | 0.844 | 0.848 | 0.85  | 0.853 |       |       |
| Suffolk                | 0.703 | 0.709 | 0.715 | 0.72  | 0.725 | 0.731 | 0.736 | 0.74  | 0.746 | 0.752 | 0.757 | 0.763 | 0.768 | 0.773 | 0.78  | 0.786 | 0.791 | 0.797 | 0.802 | 0.807 | 0.811 | 0.814 | 0.814 | 0.814 | 0.814 | 0.817 | 0.82  | 0.822 | 0.823 | 0.824 | 0.825 | 0.827 | 0.83  | 0.833 | 0.837 | 0.838 | 0.839 | 0.84  |       |
| Hertfordshire          | 0.731 | 0.737 | 0.743 | 0.748 | 0.753 | 0.757 | 0.76  | 0.764 | 0.769 | 0.775 | 0.781 | 0.788 | 0.795 | 0.801 | 0.806 | 0.812 | 0.816 | 0.822 | 0.828 | 0.836 | 0.843 | 0.848 | 0.851 | 0.853 | 0.855 | 0.858 | 0.858 | 0.859 | 0.861 | 0.862 | 0.864 | 0.866 | 0.869 | 0.874 | 0.876 | 0.878 | 0.879 |       |       |
| Essex                  | 0.701 | 0.706 | 0.712 | 0.717 | 0.722 | 0.726 | 0.73  | 0.734 | 0.739 | 0.745 | 0.75  | 0.757 | 0.763 | 0.768 | 0.774 | 0.779 | 0.784 | 0.79  | 0.796 | 0.802 | 0.808 | 0.812 | 0.814 | 0.816 | 0.819 | 0.823 | 0.825 | 0.828 | 0.83  | 0.83  | 0.831 | 0.833 | 0.836 | 0.84  | 0.842 | 0.844 | 0.845 |       |       |
| Cambridgeshire         | 0.728 | 0.734 | 0.74  | 0.745 | 0.749 | 0.755 | 0.76  | 0.765 | 0.771 | 0.777 | 0.783 | 0.789 | 0.796 | 0.801 | 0.807 | 0.814 | 0.82  | 0.827 | 0.833 | 0.838 | 0.844 | 0.849 | 0.854 | 0.856 | 0.86  | 0.862 | 0.862 | 0.862 | 0.863 | 0.867 | 0.87  | 0.874 | 0.878 | 0.88  | 0.881 | 0.882 |       |       |       |
| Thurrock               | 0.702 | 0.708 | 0.711 | 0.715 | 0.717 | 0.72  | 0.723 | 0.726 | 0.733 | 0.741 | 0.75  | 0.759 | 0.765 | 0.77  | 0.775 | 0.78  | 0.783 | 0.787 | 0.793 | 0.799 | 0.806 | 0.811 | 0.812 | 0.812 | 0.813 | 0.813 | 0.813 | 0.814 | 0.816 | 0.819 | 0.821 | 0.822 | 0.823 | 0.825 | 0.826 | 0.825 | 0.824 |       |       |
| Norfolk                | 0.702 | 0.708 | 0.714 | 0.719 | 0.723 | 0.728 | 0.733 | 0.737 | 0.743 | 0.749 | 0.754 | 0.759 | 0.764 | 0.77  | 0.775 | 0.781 | 0.786 | 0.792 | 0.798 | 0.804 | 0.81  | 0.814 | 0.817 | 0.818 | 0.821 | 0.824 | 0.826 | 0.828 | 0.83  | 0.831 | 0.832 | 0.833 | 0.836 | 0.841 | 0.844 | 0.846 | 0.848 |       |       |
| Southend-on-Sea        | 0.683 | 0.688 | 0.693 | 0.696 | 0.699 | 0.703 | 0.709 | 0.716 | 0.724 | 0.731 | 0.736 | 0.742 | 0.749 | 0.757 | 0.765 | 0.772 | 0.778 | 0.785 | 0.79  | 0.794 | 0.796 | 0.797 | 0.798 | 0.799 | 0.802 | 0.804 | 0.804 | 0.806 | 0.809 | 0.813 | 0.817 | 0.819 | 0.822 | 0.825 | 0.827 | 0.827 | 0.828 |       |       |
| Peterborough           | 0.713 | 0.719 | 0.724 | 0.728 | 0.732 | 0.737 | 0.742 | 0.747 | 0.753 | 0.759 | 0.763 | 0.767 | 0.773 | 0.778 | 0.785 | 0.79  | 0.794 | 0.798 | 0.803 | 0.809 | 0.815 | 0.819 | 0.818 | 0.816 | 0.816 | 0.816 | 0.816 | 0.816 | 0.816 | 0.816 | 0.818 | 0.823 | 0.828 | 0.831 | 0.835 | 0.837 | 0.838 | 0.839 |       |
| Luton                  | 0.692 | 0.698 | 0.703 | 0.707 | 0.71  | 0.713 | 0.715 | 0.717 | 0.725 | 0.733 | 0.743 | 0.752 | 0.759 | 0.765 | 0.771 | 0.775 | 0.779 | 0.783 | 0.787 | 0.793 | 0.798 | 0.803 | 0.809 | 0.815 | 0.818 | 0.816 | 0.816 | 0.816 | 0.816 | 0.816 | 0.818 | 0.823 | 0.829 | 0.834 | 0.837 | 0.84  | 0.843 | 0.844 | 0.845 |
| Richmond upon Thames   | 0.76  | 0.766 | 0.771 | 0.775 | 0.779 | 0.783 | 0.787 | 0.791 | 0.798 | 0.805 | 0.813 | 0.82  | 0.827 | 0.833 | 0.839 | 0.845 | 0.85  | 0.855 | 0.861 | 0.868 | 0.873 | 0.878 | 0.882 | 0.885 | 0.887 | 0.888 | 0.887 | 0.887 | 0.888 | 0.888 | 0.889 | 0.891 | 0.895 | 0.9   | 0.905 | 0.908 | 0.91  |       |       |
| Kensington and Chelsea | 0.798 | 0.804 | 0.809 | 0.815 | 0.82  | 0.826 | 0.832 | 0.837 | 0.84  | 0.848 | 0.855 | 0.861 | 0.866 | 0.871 | 0.875 | 0.88  | 0.884 | 0.889 | 0.894 | 0.9   | 0.906 | 0.91  | 0.914 | 0.917 | 0.921 | 0.924 | 0.927 | 0.929 | 0.932 | 0.934 | 0.936 | 0.938 | 0.94  | 0.941 | 0.942 | 0.943 | 0.945 |       |       |
| Barnet                 | 0.729 | 0.735 | 0.742 | 0.748 | 0.753 | 0.759 | 0.764 | 0.769 | 0.775 | 0.782 | 0.787 | 0.792 | 0.797 | 0.803 | 0.81  | 0.816 | 0.823 | 0.829 | 0.835 | 0.841 | 0.846 | 0.851 | 0.853 | 0.854 | 0.855 | 0.855 | 0.854 | 0.853 | 0.855 | 0.857 | 0.86  | 0.865 | 0.87  | 0.875 | 0.878 | 0.879 | 0.88  |       |       |
| Westminster            | 0.808 | 0.812 | 0.817 | 0.821 | 0.825 | 0.829 | 0.831 | 0.832 | 0.837 | 0.844 | 0.853 | 0.86  | 0.865 | 0.869 | 0.873 | 0.877 | 0.882 | 0.886 | 0.891 | 0.896 | 0.901 | 0.906 | 0.91  | 0.914 | 0.918 | 0.921 | 0.924 | 0.927 | 0.929 | 0.931 | 0.933 | 0.935 | 0.936 | 0.938 | 0.939 | 0.941 | 0.943 |       |       |
| Bromley                | 0.73  | 0.736 | 0.741 | 0.746 | 0.749 | 0.753 | 0.757 | 0.761 | 0.767 | 0.774 | 0.779 | 0.784 | 0.789 | 0.793 | 0.799 | 0.804 | 0.809 | 0.815 | 0.821 | 0.829 | 0.835 | 0.839 | 0.842 | 0.844 | 0.846 | 0.847 | 0.848 | 0.85  | 0.851 | 0.851 | 0.851 | 0.851 | 0.853 | 0.857 | 0.86  | 0.862 | 0.863 |       |       |
| Bexley                 | 0.701 | 0.707 | 0.713 | 0.718 | 0.722 | 0.726 | 0.73  | 0.733 | 0.739 | 0.744 | 0.749 | 0.756 | 0.762 | 0.768 | 0.774 | 0.778 | 0.781 | 0.784 | 0.789 | 0.795 | 0.801 | 0.806 | 0.809 | 0.811 | 0.812 | 0.814 | 0.815 | 0.815 | 0.817 | 0.819 | 0.821 | 0.823 | 0.824 | 0.828 | 0.833 | 0.836 | 0.838 | 0.84  |       |
| Redbridge              | 0.702 | 0.708 | 0.713 | 0.718 | 0.723 | 0.728 | 0.733 | 0.737 | 0.743 | 0.749 | 0.756 | 0.761 | 0.767 | 0.772 | 0.777 | 0.782 | 0.787 | 0.792 | 0.797 | 0.804 | 0.81  | 0.815 | 0.818 | 0.821 | 0.824 | 0.826 | 0.828 | 0.83  | 0.831 | 0.831 | 0.831 | 0.834 | 0.837 | 0.84  | 0.841 | 0.843 |       |       |       |
| Merton                 | 0.726 | 0.732 | 0.737 | 0.74  | 0.743 | 0.747 | 0.752 | 0.757 | 0.765 | 0.773 | 0.782 | 0.792 | 0.8   | 0.807 | 0.813 | 0.818 | 0.823 | 0.828 | 0.836 | 0.845 | 0.852 | 0.857 | 0.859 | 0.861 | 0.863 | 0.865 | 0.866 | 0.867 | 0.869 | 0.87  | 0.87  | 0.871 | 0.874 | 0.879 | 0.881 | 0.882 | 0.884 |       |       |
| Brent                  | 0.724 | 0.73  | 0.736 | 0.741 | 0.746 | 0.752 | 0.759 | 0.765 | 0.773 | 0.779 | 0.784 | 0.788 | 0.792 | 0.797 | 0.802 | 0.807 | 0.811 | 0.815 | 0.82  | 0.826 | 0.834 | 0.841 | 0.845 | 0.846 | 0.847 | 0.846 | 0.843 | 0.836 | 0.832 | 0.832 | 0.834 | 0.838 | 0.84  | 0.85  | 0.858 | 0.864 | 0.866 | 0.865 | 0.865 |
| Hillingdon             | 0.756 | 0.762 | 0.767 | 0.772 | 0.776 | 0.78  | 0.784 | 0.788 | 0.793 | 0.801 | 0.807 | 0.814 | 0.821 | 0.827 | 0.834 | 0.841 | 0.844 | 0.848 | 0.853 | 0.859 | 0.864 | 0.866 | 0.868 | 0.869 | 0.871 | 0.871 | 0.87  | 0.87  | 0.872 | 0.874 | 0.876 | 0.878 | 0.882 | 0.888 | 0.892 | 0.895 | 0.897 |       |       |
| Havering               | 0.703 | 0.709 | 0.715 | 0.72  | 0.724 | 0.728 | 0.732 | 0.735 | 0.74  | 0.745 | 0.75  | 0.756 | 0.762 | 0.768 | 0.774 | 0.778 | 0.783 | 0.787 | 0.792 | 0.798 | 0.803 | 0.808 | 0.81  | 0.812 | 0.815 | 0.818 | 0.82  | 0.822 | 0.825 | 0.827 | 0.828 | 0.829 | 0.83  | 0.833 | 0.835 | 0.836 | 0.837 |       |       |
| Kingston upon Thames   | 0.746 | 0.752 | 0.758 | 0.762 | 0.766 | 0.77  | 0.774 | 0.779 | 0.784 | 0.789 | 0.796 | 0.804 | 0.811 | 0.818 | 0.823 | 0.828 | 0.832 | 0.837 | 0.842 | 0.85  | 0.858 | 0.864 | 0.869 | 0.874 | 0.878 | 0.881 | 0.884 | 0.886 | 0.888 | 0.891 | 0.892 | 0.892 | 0.895 | 0.898 | 0.9   | 0.901 | 0.902 |       |       |
| Sutton                 | 0.714 | 0.72  | 0.726 | 0.73  | 0.734 | 0.737 | 0.739 | 0.743 | 0.749 | 0.    |       |       |       |       |       |       |       |       |       |       |       |       |       |       |       |       |       |       |       |       |       |       |       |       |       |       |       |       |       |

**Appendix Table 14: Socio-Demographic Index values for all estimated GBD 2016 locations, 1980–2016**

| Location                     | 1980  | 1981  | 1982  | 1983  | 1984  | 1985  | 1986  | 1987  | 1988  | 1989  | 1990  | 1991  | 1992  | 1993  | 1994  | 1995  | 1996  | 1997  | 1998  | 1999  | 2000  | 2001  | 2002  | 2003  | 2004  | 2005  | 2006  | 2007  | 2008  | 2009  | 2010  | 2011  | 2012  | 2013  | 2014  | 2015  | 2016  |       |       |
|------------------------------|-------|-------|-------|-------|-------|-------|-------|-------|-------|-------|-------|-------|-------|-------|-------|-------|-------|-------|-------|-------|-------|-------|-------|-------|-------|-------|-------|-------|-------|-------|-------|-------|-------|-------|-------|-------|-------|-------|-------|
| Bracknell Forest             | 0.733 | 0.74  | 0.746 | 0.753 | 0.76  | 0.766 | 0.771 | 0.777 | 0.784 | 0.791 | 0.796 | 0.799 | 0.804 | 0.808 | 0.812 | 0.82  | 0.824 | 0.828 | 0.833 | 0.838 | 0.842 | 0.849 | 0.855 | 0.858 | 0.86  | 0.863 | 0.866 | 0.868 | 0.87  | 0.871 | 0.872 | 0.873 | 0.874 | 0.878 | 0.882 | 0.885 | 0.887 | 0.888 |       |
| West Sussex                  | 0.72  | 0.726 | 0.731 | 0.737 | 0.741 | 0.746 | 0.75  | 0.753 | 0.759 | 0.764 | 0.769 | 0.774 | 0.78  | 0.786 | 0.792 | 0.797 | 0.803 | 0.808 | 0.813 | 0.819 | 0.824 | 0.827 | 0.828 | 0.829 | 0.831 | 0.832 | 0.834 | 0.835 | 0.836 | 0.838 | 0.841 | 0.844 | 0.847 | 0.852 | 0.854 | 0.855 | 0.856 |       |       |
| Oxfordshire                  | 0.745 | 0.751 | 0.757 | 0.762 | 0.767 | 0.773 | 0.778 | 0.782 | 0.786 | 0.79  | 0.794 | 0.799 | 0.805 | 0.81  | 0.816 | 0.822 | 0.827 | 0.832 | 0.838 | 0.845 | 0.851 | 0.856 | 0.858 | 0.86  | 0.863 | 0.865 | 0.866 | 0.866 | 0.867 | 0.868 | 0.87  | 0.874 | 0.879 | 0.884 | 0.887 | 0.889 | 0.89  |       |       |
| Reading                      | 0.753 | 0.759 | 0.764 | 0.769 | 0.772 | 0.775 | 0.779 | 0.783 | 0.79  | 0.798 | 0.806 | 0.815 | 0.822 | 0.827 | 0.832 | 0.837 | 0.842 | 0.847 | 0.853 | 0.861 | 0.869 | 0.876 | 0.88  | 0.882 | 0.885 | 0.886 | 0.884 | 0.883 | 0.884 | 0.886 | 0.89  | 0.893 | 0.897 | 0.901 | 0.904 | 0.905 | 0.906 |       |       |
| Kent                         | 0.71  | 0.716 | 0.721 | 0.726 | 0.729 | 0.733 | 0.736 | 0.74  | 0.745 | 0.75  | 0.755 | 0.76  | 0.765 | 0.771 | 0.776 | 0.781 | 0.786 | 0.791 | 0.797 | 0.803 | 0.808 | 0.814 | 0.815 | 0.816 | 0.818 | 0.821 | 0.822 | 0.823 | 0.824 | 0.826 | 0.827 | 0.829 | 0.832 | 0.835 | 0.839 | 0.84  | 0.844 | 0.845 |       |
| Brighton and Hove            | 0.73  | 0.735 | 0.74  | 0.743 | 0.745 | 0.748 | 0.751 | 0.755 | 0.763 | 0.771 | 0.781 | 0.79  | 0.797 | 0.803 | 0.808 | 0.813 | 0.819 | 0.824 | 0.829 | 0.834 | 0.839 | 0.845 | 0.851 | 0.857 | 0.862 | 0.867 | 0.872 | 0.874 | 0.877 | 0.88  | 0.884 | 0.887 | 0.889 | 0.891 | 0.894 | 0.896 | 0.899 |       |       |
| Medway                       | 0.686 | 0.691 | 0.697 | 0.701 | 0.706 | 0.71  | 0.715 | 0.72  | 0.727 | 0.733 | 0.738 | 0.744 | 0.749 | 0.753 | 0.758 | 0.763 | 0.769 | 0.774 | 0.78  | 0.785 | 0.791 | 0.796 | 0.799 | 0.801 | 0.804 | 0.807 | 0.81  | 0.811 | 0.813 | 0.813 | 0.815 | 0.816 | 0.82  | 0.824 | 0.827 | 0.829 | 0.831 |       |       |
| East Sussex                  | 0.696 | 0.702 | 0.708 | 0.713 | 0.718 | 0.723 | 0.728 | 0.732 | 0.737 | 0.742 | 0.746 | 0.75  | 0.755 | 0.759 | 0.765 | 0.77  | 0.776 | 0.781 | 0.786 | 0.791 | 0.796 | 0.799 | 0.8   | 0.801 | 0.803 | 0.806 | 0.807 | 0.808 | 0.809 | 0.81  | 0.813 | 0.817 | 0.821 | 0.826 | 0.83  | 0.832 | 0.834 |       |       |
| Portsmouth                   | 0.728 | 0.734 | 0.74  | 0.744 | 0.746 | 0.748 | 0.751 | 0.754 | 0.76  | 0.768 | 0.776 | 0.784 | 0.791 | 0.797 | 0.802 | 0.806 | 0.81  | 0.815 | 0.821 | 0.828 | 0.836 | 0.843 | 0.849 | 0.853 | 0.858 | 0.861 | 0.864 | 0.867 | 0.869 | 0.87  | 0.87  | 0.868 | 0.869 | 0.871 | 0.873 | 0.876 | 0.878 |       |       |
| Isle of Wight                | 0.695 | 0.7   | 0.706 | 0.71  | 0.714 | 0.719 | 0.724 | 0.73  | 0.737 | 0.741 | 0.744 | 0.746 | 0.748 | 0.751 | 0.756 | 0.762 | 0.768 | 0.774 | 0.78  | 0.787 | 0.795 | 0.804 | 0.809 | 0.811 | 0.812 | 0.813 | 0.814 | 0.816 | 0.818 | 0.819 | 0.821 | 0.823 | 0.826 | 0.829 | 0.831 | 0.833 | 0.835 |       |       |
| Milton Keynes                | 0.757 | 0.761 | 0.766 | 0.762 | 0.763 | 0.768 | 0.775 | 0.783 | 0.79  | 0.795 | 0.796 | 0.799 | 0.804 | 0.811 | 0.818 | 0.825 | 0.83  | 0.835 | 0.839 | 0.843 | 0.847 | 0.85  | 0.85  | 0.85  | 0.853 | 0.855 | 0.856 | 0.855 | 0.855 | 0.856 | 0.856 | 0.856 | 0.856 | 0.856 | 0.856 | 0.856 | 0.856 | 0.856 |       |
| Southampton                  | 0.728 | 0.734 | 0.739 | 0.743 | 0.746 | 0.748 | 0.749 | 0.75  | 0.754 | 0.761 | 0.771 | 0.782 | 0.79  | 0.798 | 0.804 | 0.81  | 0.814 | 0.819 | 0.825 | 0.832 | 0.84  | 0.845 | 0.849 | 0.854 | 0.858 | 0.863 | 0.866 | 0.868 | 0.869 | 0.868 | 0.867 | 0.866 | 0.867 | 0.871 | 0.874 | 0.876 | 0.878 |       |       |
| Slough                       | 0.749 | 0.753 | 0.756 | 0.757 | 0.759 | 0.762 | 0.766 | 0.771 | 0.779 | 0.787 | 0.795 | 0.805 | 0.812 | 0.818 | 0.824 | 0.83  | 0.836 | 0.84  | 0.844 | 0.847 | 0.852 | 0.855 | 0.854 | 0.851 | 0.848 | 0.846 | 0.843 | 0.845 | 0.85  | 0.855 | 0.861 | 0.866 | 0.871 | 0.874 | 0.875 | 0.874 | 0.873 |       |       |
| South Gloucestershire        | 0.731 | 0.737 | 0.742 | 0.747 | 0.751 | 0.756 | 0.762 | 0.767 | 0.774 | 0.779 | 0.783 | 0.787 | 0.791 | 0.795 | 0.799 | 0.803 | 0.809 | 0.816 | 0.824 | 0.832 | 0.839 | 0.844 | 0.846 | 0.848 | 0.851 | 0.855 | 0.858 | 0.861 | 0.865 | 0.866 | 0.867 | 0.868 | 0.871 | 0.875 | 0.878 | 0.88  | 0.882 |       |       |
| Dorset                       | 0.704 | 0.71  | 0.715 | 0.721 | 0.726 | 0.731 | 0.737 | 0.742 | 0.747 | 0.752 | 0.754 | 0.757 | 0.762 | 0.768 | 0.775 | 0.781 | 0.788 | 0.794 | 0.801 | 0.807 | 0.811 | 0.813 | 0.814 | 0.813 | 0.815 | 0.816 | 0.815 | 0.814 | 0.814 | 0.814 | 0.816 | 0.821 | 0.827 | 0.833 | 0.837 | 0.839 | 0.841 | 0.842 |       |
| Wiltshire                    | 0.713 | 0.719 | 0.725 | 0.731 | 0.736 | 0.741 | 0.746 | 0.75  | 0.756 | 0.761 | 0.766 | 0.77  | 0.775 | 0.781 | 0.787 | 0.793 | 0.798 | 0.804 | 0.81  | 0.815 | 0.821 | 0.825 | 0.826 | 0.827 | 0.829 | 0.829 | 0.828 | 0.826 | 0.825 | 0.826 | 0.826 | 0.825 | 0.826 | 0.826 | 0.825 | 0.824 | 0.844 | 0.846 | 0.847 |
| North Somerset               | 0.695 | 0.701 | 0.708 | 0.714 | 0.721 | 0.727 | 0.734 | 0.74  | 0.746 | 0.751 | 0.753 | 0.756 | 0.761 | 0.766 | 0.771 | 0.776 | 0.781 | 0.787 | 0.793 | 0.799 | 0.805 | 0.809 | 0.811 | 0.813 | 0.817 | 0.821 | 0.823 | 0.825 | 0.827 | 0.826 | 0.827 | 0.829 | 0.833 | 0.838 | 0.841 | 0.843 | 0.844 |       |       |
| Devon                        | 0.701 | 0.707 | 0.712 | 0.717 | 0.721 | 0.726 | 0.731 | 0.736 | 0.742 | 0.748 | 0.753 | 0.757 | 0.762 | 0.767 | 0.772 | 0.777 | 0.782 | 0.788 | 0.794 | 0.802 | 0.809 | 0.815 | 0.818 | 0.821 | 0.825 | 0.829 | 0.831 | 0.833 | 0.834 | 0.835 | 0.836 | 0.837 | 0.84  | 0.845 | 0.849 | 0.851 | 0.853 |       |       |
| Poole                        | 0.708 | 0.714 | 0.719 | 0.724 | 0.729 | 0.735 | 0.741 | 0.748 | 0.752 | 0.756 | 0.761 | 0.766 | 0.771 | 0.776 | 0.782 | 0.787 | 0.792 | 0.797 | 0.802 | 0.808 | 0.814 | 0.82  | 0.826 | 0.83  | 0.833 | 0.834 | 0.835 | 0.835 | 0.836 | 0.836 | 0.836 | 0.836 | 0.836 | 0.836 | 0.836 | 0.836 | 0.836 | 0.836 |       |
| Bath and North East Somerset | 0.722 | 0.727 | 0.732 | 0.737 | 0.74  | 0.745 | 0.75  | 0.756 | 0.762 | 0.768 | 0.772 | 0.777 | 0.782 | 0.787 | 0.793 | 0.798 | 0.803 | 0.808 | 0.816 | 0.824 | 0.83  | 0.837 | 0.843 | 0.849 | 0.855 | 0.86  | 0.863 | 0.867 | 0.87  | 0.871 | 0.871 | 0.872 | 0.874 | 0.878 | 0.882 | 0.884 | 0.886 |       |       |
| Gloucestershire              | 0.716 | 0.722 | 0.728 | 0.733 | 0.738 | 0.744 | 0.749 | 0.754 | 0.76  | 0.765 | 0.77  | 0.775 | 0.779 | 0.785 | 0.79  | 0.796 | 0.801 | 0.806 | 0.812 | 0.819 | 0.826 | 0.832 | 0.835 | 0.838 | 0.842 | 0.844 | 0.844 | 0.844 | 0.844 | 0.845 | 0.846 | 0.849 | 0.851 | 0.855 | 0.859 | 0.861 | 0.862 | 0.863 |       |
| Somerset                     | 0.701 | 0.708 | 0.714 | 0.719 | 0.725 | 0.73  | 0.734 | 0.738 | 0.743 | 0.748 | 0.752 | 0.756 | 0.762 | 0.767 | 0.774 | 0.78  | 0.786 | 0.791 | 0.795 | 0.801 | 0.807 | 0.811 | 0.812 | 0.813 | 0.816 | 0.818 | 0.819 | 0.82  | 0.821 | 0.823 | 0.827 | 0.83  | 0.834 | 0.835 | 0.835 | 0.836 |       |       |       |
| Swindon                      | 0.736 | 0.742 | 0.748 | 0.753 | 0.757 | 0.761 | 0.766 | 0.77  | 0.777 | 0.784 | 0.79  | 0.796 | 0.801 | 0.806 | 0.81  | 0.815 | 0.819 | 0.824 | 0.831 | 0.838 | 0.844 | 0.849 | 0.851 | 0.851 | 0.851 | 0.852 | 0.851 | 0.853 | 0.855 | 0.856 | 0.858 | 0.859 | 0.861 | 0.865 | 0.866 | 0.866 | 0.867 |       |       |
| Torbay                       | 0.684 | 0.69  | 0.696 | 0.701 | 0.706 | 0.711 | 0.715 | 0.721 | 0.728 | 0.734 | 0.738 | 0.743 | 0.749 | 0.755 | 0.761 | 0.767 | 0.772 | 0.777 | 0.782 | 0.787 | 0.793 | 0.799 | 0.805 | 0.811 | 0.813 | 0.817 | 0.821 | 0.823 | 0.825 | 0.827 | 0.826 | 0.827 | 0.829 | 0.833 | 0.838 | 0.841 | 0.843 | 0.844 |       |
| Bristol, City of             | 0.738 | 0.744 | 0.749 | 0.753 | 0.756 | 0.759 | 0.763 | 0.766 | 0.772 | 0.779 | 0.787 | 0.796 | 0.804 | 0.811 | 0.817 | 0.822 | 0.827 | 0.832 | 0.838 | 0.847 | 0.854 | 0.859 | 0.863 | 0.865 | 0.869 | 0.872 | 0.875 | 0.878 | 0.881 | 0.882 | 0.881 | 0.88  | 0.882 | 0.887 | 0.891 | 0.895 | 0.898 |       |       |
| Bournemouth                  | 0.705 | 0.71  | 0.715 | 0.72  | 0.726 | 0.732 | 0.737 | 0.742 | 0.747 | 0.752 | 0.759 | 0.767 | 0.775 | 0.78  | 0.786 | 0.791 | 0.797 | 0.802 | 0.808 | 0.814 | 0.82  | 0.826 | 0.831 | 0.837 | 0.841 | 0.847 | 0.846 | 0.846 | 0.847 | 0.846 | 0.846 | 0.846 | 0.846 | 0.846 | 0.846 | 0.846 | 0.846 | 0.846 |       |
| Cornwall                     | 0.685 | 0.691 | 0.697 | 0.702 | 0.708 | 0.713 | 0.718 | 0.723 | 0.729 | 0.735 | 0.739 | 0.743 | 0.748 | 0.754 | 0.76  | 0.766 | 0.771 | 0.776 | 0.782 | 0.789 | 0.796 | 0.801 | 0.805 | 0.808 | 0.812 | 0.815 | 0.818 | 0.819 | 0.821 | 0.822 | 0.823 | 0.826 | 0.83  | 0.832 | 0.833 | 0.835 |       |       |       |
| Plymouth                     | 0.699 | 0.705 | 0.711 | 0.718 | 0.723 | 0.729 | 0.736 | 0.741 | 0.747 | 0.752 | 0.757 | 0.762 | 0.769 | 0.776 | 0.783 | 0.789 | 0.793 | 0.798 | 0.804 | 0.81  | 0.815 | 0.819 | 0.822 | 0.823 | 0.827 | 0.83  | 0.833 | 0.836 | 0.839 | 0.84  | 0.841 | 0.843 | 0.847 | 0.85  | 0.851 | 0.853 |       |       |       |
| North East England           | 0.681 | 0.687 | 0.692 | 0.698 | 0.702 | 0.708 | 0.714 | 0.72  | 0.727 | 0.732 | 0.737 | 0.743 | 0.749 | 0.755 | 0.762 | 0.768 | 0.773 | 0.779 | 0.785 | 0.792 | 0.798 | 0.804 | 0.81  | 0.815 | 0.819 | 0.822 | 0.824 | 0.826 | 0.828 | 0.83  | 0.834 | 0.838 | 0.841 | 0.843 | 0.845 | 0.847 | 0.848 |       |       |
| North West England           | 0.693 | 0.699 | 0.704 | 0.709 | 0.714 | 0.719 | 0.724 | 0.729 | 0.735 | 0.741 | 0.746 | 0.752 | 0.759 | 0.766 | 0.773 | 0.778 | 0.783 | 0.788 | 0.794 | 0.801 | 0.807 | 0.813 | 0.816 | 0.818 | 0.821 | 0.823 | 0.825 | 0.826 | 0.828 | 0.83  | 0.833 | 0.836 | 0.84  | 0.845 | 0.848 | 0.85  | 0.851 |       |       |
| Yorkshire and the Humber     | 0.69  | 0.695 | 0.701 | 0.706 | 0.711 | 0.716 | 0.721 | 0.726 | 0.733 | 0.738 | 0.743 | 0.749 | 0.755 | 0.761 | 0.767 | 0.773 | 0.777 | 0.783 | 0.789 | 0.795 | 0.802 | 0.808 | 0.811 | 0.813 | 0.816 | 0.82  | 0.822 | 0.825 | 0.828 | 0.83  | 0.832 | 0.834 | 0.837 | 0.841 | 0.843 | 0.845 | 0.846 |       |       |
| East Midlands                | 0.691 | 0.697 | 0.703 | 0.709 | 0.714 | 0.719 | 0.725 | 0.7   |       |       |       |       |       |       |       |       |       |       |       |       |       |       |       |       |       |       |       |       |       |       |       |       |       |       |       |       |       |       |       |



Appendix Table 14: Socio-Demographic Index values for all estimated GBD 2016 locations, 1980–2016

| Location              | 1980  | 1981  | 1982  | 1983  | 1984  | 1985  | 1986  | 1987  | 1988  | 1989  | 1990  | 1991  | 1992  | 1993  | 1994  | 1995  | 1996  | 1997  | 1998  | 1999  | 2000  | 2001  | 2002  | 2003  | 2004  | 2005  | 2006  | 2007  | 2008  | 2009  | 2010  | 2011  | 2012  | 2013  | 2014  | 2015  | 2016  |       |
|-----------------------|-------|-------|-------|-------|-------|-------|-------|-------|-------|-------|-------|-------|-------|-------|-------|-------|-------|-------|-------|-------|-------|-------|-------|-------|-------|-------|-------|-------|-------|-------|-------|-------|-------|-------|-------|-------|-------|-------|
| Puerto Rico           | 0.699 | 0.71  | 0.719 | 0.727 | 0.733 | 0.739 | 0.743 | 0.748 | 0.753 | 0.76  | 0.767 | 0.774 | 0.781 | 0.788 | 0.793 | 0.799 | 0.805 | 0.81  | 0.817 | 0.822 | 0.828 | 0.834 | 0.84  | 0.845 | 0.85  | 0.854 | 0.858 | 0.86  | 0.863 | 0.864 | 0.866 | 0.867 | 0.868 | 0.87  | 0.871 | 0.873 | 0.875 |       |
| Virgin Islands, U.S.  | 0.723 | 0.732 | 0.738 | 0.743 | 0.749 | 0.755 | 0.76  | 0.764 | 0.767 | 0.771 | 0.777 | 0.782 | 0.789 | 0.796 | 0.802 | 0.808 | 0.814 | 0.82  | 0.825 | 0.829 | 0.833 | 0.836 | 0.839 | 0.842 | 0.845 | 0.85  | 0.855 | 0.861 | 0.864 | 0.868 | 0.871 | 0.874 | 0.875 | 0.876 | 0.877 | 0.878 | 0.877 | 0.877 |
| Andean Latin America  | 0.45  | 0.457 | 0.465 | 0.473 | 0.481 | 0.488 | 0.496 | 0.504 | 0.511 | 0.518 | 0.524 | 0.53  | 0.536 | 0.541 | 0.548 | 0.555 | 0.561 | 0.568 | 0.575 | 0.582 | 0.588 | 0.594 | 0.6   | 0.605 | 0.61  | 0.615 | 0.62  | 0.625 | 0.63  | 0.635 | 0.64  | 0.644 | 0.649 | 0.653 | 0.657 | 0.662 | 0.666 | 0.666 |
| Bolivia               | 0.354 | 0.361 | 0.368 | 0.376 | 0.383 | 0.39  | 0.397 | 0.405 | 0.412 | 0.418 | 0.425 | 0.432 | 0.439 | 0.446 | 0.453 | 0.461 | 0.469 | 0.477 | 0.485 | 0.494 | 0.502 | 0.51  | 0.518 | 0.525 | 0.531 | 0.539 | 0.546 | 0.553 | 0.56  | 0.567 | 0.573 | 0.58  | 0.586 | 0.593 | 0.599 | 0.605 | 0.61  |       |
| Ecuador               | 0.45  | 0.458 | 0.467 | 0.475 | 0.484 | 0.493 | 0.501 | 0.509 | 0.516 | 0.523 | 0.53  | 0.537 | 0.543 | 0.55  | 0.556 | 0.563 | 0.569 | 0.576 | 0.583 | 0.588 | 0.593 | 0.598 | 0.603 | 0.608 | 0.613 | 0.619 | 0.624 | 0.629 | 0.635 | 0.64  | 0.645 | 0.65  | 0.655 | 0.66  | 0.665 | 0.67  | 0.674 |       |
| Peru                  | 0.478 | 0.485 | 0.493 | 0.5   | 0.507 | 0.514 | 0.521 | 0.529 | 0.537 | 0.543 | 0.548 | 0.553 | 0.558 | 0.563 | 0.569 | 0.576 | 0.582 | 0.589 | 0.593 | 0.597 | 0.603 | 0.61  | 0.615 | 0.621 | 0.626 | 0.63  | 0.634 | 0.639 | 0.644 | 0.648 | 0.652 | 0.656 | 0.66  | 0.663 | 0.666 | 0.67  | 0.674 |       |
| Central Latin America | 0.466 | 0.476 | 0.485 | 0.493 | 0.502 | 0.51  | 0.518 | 0.525 | 0.531 | 0.537 | 0.544 | 0.551 | 0.56  | 0.568 | 0.575 | 0.581 | 0.588 | 0.595 | 0.602 | 0.609 | 0.615 | 0.622 | 0.627 | 0.633 | 0.639 | 0.645 | 0.652 | 0.659 | 0.665 | 0.671 | 0.676 | 0.682 | 0.689 | 0.695 | 0.701 | 0.707 | 0.711 |       |
| Colombia              | 0.485 | 0.493 | 0.5   | 0.506 | 0.513 | 0.519 | 0.526 | 0.532 | 0.538 | 0.544 | 0.55  | 0.556 | 0.562 | 0.568 | 0.574 | 0.581 | 0.588 | 0.595 | 0.601 | 0.606 | 0.611 | 0.616 | 0.62  | 0.624 | 0.629 | 0.634 | 0.639 | 0.645 | 0.652 | 0.658 | 0.664 | 0.672 | 0.679 | 0.686 | 0.694 | 0.701 | 0.707 |       |
| Costa Rica            | 0.527 | 0.532 | 0.535 | 0.537 | 0.539 | 0.541 | 0.546 | 0.552 | 0.557 | 0.563 | 0.57  | 0.577 | 0.584 | 0.591 | 0.598 | 0.603 | 0.608 | 0.614 | 0.62  | 0.627 | 0.634 | 0.64  | 0.646 | 0.651 | 0.657 | 0.662 | 0.668 | 0.674 | 0.679 | 0.685 | 0.691 | 0.697 | 0.704 | 0.71  | 0.716 | 0.722 | 0.726 |       |
| El Salvador           | 0.383 | 0.392 | 0.401 | 0.408 | 0.414 | 0.419 | 0.424 | 0.429 | 0.434 | 0.439 | 0.444 | 0.451 | 0.458 | 0.465 | 0.472 | 0.48  | 0.488 | 0.496 | 0.504 | 0.513 | 0.521 | 0.529 | 0.537 | 0.545 | 0.552 | 0.56  | 0.568 | 0.576 | 0.584 | 0.592 | 0.6   | 0.609 | 0.617 | 0.625 | 0.632 | 0.639 | 0.645 |       |
| Guatemala             | 0.325 | 0.33  | 0.335 | 0.338 | 0.342 | 0.345 | 0.348 | 0.351 | 0.355 | 0.36  | 0.365 | 0.37  | 0.376 | 0.383 | 0.389 | 0.396 | 0.404 | 0.412 | 0.42  | 0.429 | 0.438 | 0.446 | 0.455 | 0.463 | 0.472 | 0.48  | 0.489 | 0.498 | 0.506 | 0.514 | 0.522 | 0.53  | 0.537 | 0.543 | 0.55  | 0.556 | 0.561 |       |
| Honduras              | 0.295 | 0.304 | 0.313 | 0.321 | 0.329 | 0.337 | 0.345 | 0.353 | 0.362 | 0.37  | 0.381 | 0.39  | 0.4   | 0.409 | 0.418 | 0.427 | 0.435 | 0.443 | 0.451 | 0.459 | 0.466 | 0.474 | 0.481 | 0.488 | 0.495 | 0.502 | 0.508 | 0.515 | 0.522 | 0.527 | 0.533 | 0.539 | 0.545 | 0.551 | 0.556 | 0.562 | 0.567 |       |
| Mexico                | 0.458 | 0.47  | 0.481 | 0.491 | 0.501 | 0.511 | 0.521 | 0.53  | 0.538 | 0.547 | 0.555 | 0.564 | 0.573 | 0.582 | 0.591 | 0.598 | 0.606 | 0.614 | 0.622 | 0.629 | 0.637 | 0.644 | 0.651 | 0.657 | 0.664 | 0.671 | 0.678 | 0.684 | 0.691 | 0.695 | 0.701 | 0.706 | 0.712 | 0.718 | 0.723 | 0.729 | 0.734 |       |
| Nicaragua             | 0.409 | 0.412 | 0.415 | 0.418 | 0.421 | 0.424 | 0.427 | 0.43  | 0.431 | 0.433 | 0.434 | 0.436 | 0.438 | 0.44  | 0.443 | 0.447 | 0.453 | 0.459 | 0.466 | 0.473 | 0.481 | 0.488 | 0.496 | 0.502 | 0.509 | 0.516 | 0.523 | 0.53  | 0.537 | 0.543 | 0.549 | 0.555 | 0.562 | 0.569 | 0.576 | 0.583 | 0.588 |       |
| Panama                | 0.542 | 0.552 | 0.56  | 0.568 | 0.574 | 0.581 | 0.588 | 0.594 | 0.597 | 0.6   | 0.603 | 0.607 | 0.611 | 0.615 | 0.62  | 0.624 | 0.628 | 0.633 | 0.64  | 0.647 | 0.653 | 0.66  | 0.666 | 0.67  | 0.674 | 0.679 | 0.683 | 0.688 | 0.693 | 0.698 | 0.704 | 0.71  | 0.718 | 0.726 | 0.735 | 0.744 | 0.752 |       |
| Venezuela             | 0.533 | 0.54  | 0.547 | 0.557 | 0.568 | 0.577 | 0.583 | 0.588 | 0.594 | 0.592 | 0.59  | 0.602 | 0.619 | 0.628 | 0.639 | 0.652 | 0.663 | 0.676 | 0.687 | 0.695 | 0.703 | 0.709 | 0.713 | 0.715 | 0.718 | 0.722 | 0.728 | 0.735 | 0.74  | 0.745 | 0.751 | 0.758 | 0.764 | 0.769 | 0.773 | 0.776 |       |       |
| Aguascalientes        | 0.49  | 0.502 | 0.512 | 0.521 | 0.53  | 0.538 | 0.548 | 0.558 | 0.567 | 0.576 | 0.586 | 0.597 | 0.608 | 0.617 | 0.624 | 0.631 | 0.639 | 0.648 | 0.656 | 0.663 | 0.67  | 0.675 | 0.681 | 0.687 | 0.693 | 0.699 | 0.705 | 0.711 | 0.715 | 0.719 | 0.723 | 0.728 | 0.733 | 0.739 | 0.744 | 0.749 | 0.754 |       |
| Baja California       | 0.523 | 0.536 | 0.548 | 0.56  | 0.572 | 0.585 | 0.597 | 0.608 | 0.617 | 0.624 | 0.629 | 0.635 | 0.642 | 0.65  | 0.658 | 0.666 | 0.672 | 0.676 | 0.68  | 0.687 | 0.695 | 0.703 | 0.709 | 0.713 | 0.715 | 0.718 | 0.722 | 0.728 | 0.735 | 0.74  | 0.745 | 0.751 | 0.758 | 0.764 | 0.769 | 0.773 | 0.776 |       |
| Baja California Sur   | 0.535 | 0.547 | 0.559 | 0.571 | 0.584 | 0.596 | 0.605 | 0.615 | 0.627 | 0.635 | 0.644 | 0.654 | 0.663 | 0.669 | 0.676 | 0.689 | 0.696 | 0.701 | 0.708 | 0.717 | 0.727 | 0.737 | 0.747 | 0.757 | 0.767 | 0.777 | 0.787 | 0.796 | 0.805 | 0.814 | 0.823 | 0.832 | 0.841 | 0.85  | 0.859 | 0.868 |       |       |
| Campeche              | 0.437 | 0.449 | 0.459 | 0.468 | 0.477 | 0.485 | 0.494 | 0.503 | 0.511 | 0.52  | 0.53  | 0.541 | 0.551 | 0.56  | 0.567 | 0.574 | 0.582 | 0.593 | 0.603 | 0.614 | 0.625 | 0.635 | 0.643 | 0.651 | 0.658 | 0.665 | 0.671 | 0.677 | 0.682 | 0.685 | 0.688 | 0.693 | 0.7   | 0.707 | 0.713 | 0.72  | 0.726 |       |
| Coahuila              | 0.499 | 0.512 | 0.523 | 0.533 | 0.543 | 0.552 | 0.562 | 0.572 | 0.582 | 0.593 | 0.605 | 0.617 | 0.63  | 0.64  | 0.649 | 0.656 | 0.663 | 0.671 | 0.679 | 0.685 | 0.691 | 0.697 | 0.702 | 0.708 | 0.714 | 0.72  | 0.726 | 0.733 | 0.739 | 0.743 | 0.747 | 0.752 | 0.754 | 0.758 | 0.762 | 0.766 | 0.77  |       |
| Colima                | 0.472 | 0.485 | 0.496 | 0.506 | 0.517 | 0.528 | 0.54  | 0.553 | 0.565 | 0.579 | 0.591 | 0.604 | 0.616 | 0.625 | 0.632 | 0.638 | 0.645 | 0.652 | 0.659 | 0.666 | 0.672 | 0.678 | 0.683 | 0.689 | 0.695 | 0.7   | 0.706 | 0.712 | 0.716 | 0.719 | 0.723 | 0.727 | 0.732 | 0.737 | 0.742 | 0.748 | 0.753 |       |
| Chiapas               | 0.3   | 0.313 | 0.323 | 0.332 | 0.338 | 0.342 | 0.345 | 0.345 | 0.342 | 0.339 | 0.342 | 0.355 | 0.375 | 0.393 | 0.41  | 0.427 | 0.444 | 0.459 | 0.472 | 0.483 | 0.491 | 0.499 | 0.508 | 0.517 | 0.527 | 0.536 | 0.546 | 0.555 | 0.563 | 0.57  | 0.577 | 0.585 | 0.593 | 0.6   | 0.608 | 0.616 | 0.622 |       |
| Chihuahua             | 0.49  | 0.503 | 0.513 | 0.523 | 0.531 | 0.54  | 0.549 | 0.559 | 0.568 | 0.578 | 0.587 | 0.597 | 0.607 | 0.614 | 0.62  | 0.623 | 0.628 | 0.634 | 0.639 | 0.645 | 0.651 | 0.658 | 0.666 | 0.673 | 0.682 | 0.689 | 0.697 | 0.705 | 0.713 | 0.719 | 0.726 | 0.734 | 0.743 | 0.75  | 0.758 | 0.764 | 0.769 |       |
| Distrito Federal      | 0.592 | 0.605 | 0.615 | 0.624 | 0.631 | 0.635 | 0.638 | 0.642 | 0.649 | 0.66  | 0.671 | 0.68  | 0.686 | 0.692 | 0.702 | 0.713 | 0.723 | 0.729 | 0.733 | 0.738 | 0.743 | 0.749 | 0.755 | 0.761 | 0.766 | 0.771 | 0.776 | 0.779 | 0.782 | 0.783 | 0.785 | 0.79  | 0.796 | 0.802 | 0.808 | 0.814 | 0.819 |       |
| Durango               | 0.459 | 0.47  | 0.48  | 0.488 | 0.495 | 0.502 | 0.509 | 0.516 | 0.522 | 0.536 | 0.544 | 0.553 | 0.563 | 0.568 | 0.576 | 0.586 | 0.593 | 0.605 | 0.615 | 0.624 | 0.632 | 0.641 | 0.65  | 0.657 | 0.666 | 0.672 | 0.678 | 0.681 | 0.684 | 0.688 | 0.691 | 0.696 | 0.7   | 0.705 | 0.709 | 0.714 |       |       |
| Guajuato              | 0.384 | 0.396 | 0.407 | 0.417 | 0.427 | 0.437 | 0.448 | 0.461 | 0.472 | 0.485 | 0.497 | 0.511 | 0.524 | 0.534 | 0.543 | 0.551 | 0.562 | 0.573 | 0.583 | 0.593 | 0.603 | 0.611 | 0.619 | 0.627 | 0.634 | 0.642 | 0.65  | 0.658 | 0.666 | 0.671 | 0.677 | 0.683 | 0.688 | 0.694 | 0.7   | 0.706 | 0.711 |       |
| Guerrero              | 0.355 | 0.367 | 0.378 | 0.387 | 0.395 | 0.404 | 0.413 | 0.423 | 0.431 | 0.437 | 0.441 | 0.444 | 0.445 | 0.442 | 0.438 | 0.439 | 0.445 | 0.454 | 0.464 | 0.473 | 0.483 | 0.494 | 0.505 | 0.517 | 0.529 | 0.54  | 0.551 | 0.562 | 0.57  | 0.577 | 0.585 | 0.595 | 0.606 | 0.617 | 0.626 | 0.634 | 0.639 |       |
| Hidalgo               | 0.383 | 0.395 | 0.406 | 0.416 | 0.426 | 0.437 | 0.449 | 0.46  | 0.47  | 0.48  | 0.49  | 0.501 | 0.513 | 0.521 | 0.527 | 0.533 | 0.541 | 0.55  | 0.56  | 0.569 | 0.577 | 0.584 | 0.593 | 0.6   | 0.609 | 0.616 | 0.624 | 0.633 | 0.64  | 0.646 | 0.651 | 0.656 | 0.662 | 0.668 | 0.674 | 0.68  | 0.685 |       |
| Jalisco               | 0.463 | 0.475 | 0.486 | 0.496 | 0.505 | 0.514 | 0.524 | 0.535 | 0.544 | 0.554 | 0.565 | 0.577 | 0.589 | 0.599 | 0.607 | 0.615 | 0.624 | 0.633 | 0.642 | 0.65  | 0.658 | 0.664 | 0.671 | 0.677 | 0.684 | 0.69  | 0.697 | 0.703 | 0.709 | 0.712 | 0.716 | 0.719 | 0.723 | 0.727 | 0.732 | 0.736 | 0.741 |       |
| México                | 0.447 | 0.463 | 0.481 | 0.502 | 0.528 | 0.554 | 0.571 | 0.582 | 0.592 | 0.595 | 0.597 | 0.598 | 0.6   | 0.616 | 0.637 | 0.646 | 0.651 | 0.655 | 0.66  | 0.666 | 0.673 | 0.679 | 0.684 | 0.688 | 0.692 | 0.697 | 0.701 | 0.703 | 0.706 | 0.711 | 0.717 | 0.723 | 0.728 | 0.733 | 0.739 | 0.745 | 0.75  |       |
| Michoacán de Ocampo   | 0.368 | 0.38  | 0.391 | 0.401 | 0.41  | 0.42  | 0.431 | 0.443 | 0.453 | 0.464 | 0.476 | 0.488 | 0.5   | 0.51  | 0.517 | 0.525 | 0.535 | 0.547 | 0.558 | 0.568 | 0     |       |       |       |       |       |       |       |       |       |       |       |       |       |       |       |       |       |

**Appendix Table 14: Socio-Demographic Index values for all estimated GBD 2016 locations, 1980–2016**

| Location                     | 1980  | 1981  | 1982  | 1983  | 1984  | 1985  | 1986  | 1987  | 1988  | 1989  | 1990  | 1991  | 1992  | 1993  | 1994  | 1995  | 1996  | 1997  | 1998  | 1999  | 2000  | 2001  | 2002  | 2003  | 2004  | 2005  | 2006  | 2007  | 2008  | 2009  | 2010  | 2011  | 2012  | 2013  | 2014  | 2015  | 2016  |       |
|------------------------------|-------|-------|-------|-------|-------|-------|-------|-------|-------|-------|-------|-------|-------|-------|-------|-------|-------|-------|-------|-------|-------|-------|-------|-------|-------|-------|-------|-------|-------|-------|-------|-------|-------|-------|-------|-------|-------|-------|
| Distrito Federal             | 0.597 | 0.607 | 0.617 | 0.625 | 0.634 | 0.643 | 0.652 | 0.659 | 0.666 | 0.673 | 0.68  | 0.686 | 0.692 | 0.698 | 0.704 | 0.71  | 0.717 | 0.723 | 0.729 | 0.735 | 0.741 | 0.747 | 0.753 | 0.758 | 0.764 | 0.769 | 0.775 | 0.781 | 0.787 | 0.793 | 0.8   | 0.806 | 0.812 | 0.818 | 0.824 | 0.829 | 0.832 |       |
| Espirito Santo               | 0.459 | 0.47  | 0.481 | 0.49  | 0.499 | 0.509 | 0.518 | 0.527 | 0.536 | 0.545 | 0.553 | 0.561 | 0.568 | 0.577 | 0.584 | 0.592 | 0.6   | 0.607 | 0.614 | 0.621 | 0.628 | 0.635 | 0.642 | 0.648 | 0.654 | 0.66  | 0.665 | 0.671 | 0.677 | 0.682 | 0.688 | 0.694 | 0.699 | 0.705 | 0.711 | 0.717 | 0.721 |       |
| Goias                        | 0.396 | 0.411 | 0.425 | 0.437 | 0.45  | 0.462 | 0.473 | 0.483 | 0.493 | 0.502 | 0.511 | 0.52  | 0.528 | 0.537 | 0.546 | 0.555 | 0.565 | 0.574 | 0.582 | 0.59  | 0.597 | 0.604 | 0.612 | 0.617 | 0.623 | 0.628 | 0.635 | 0.641 | 0.647 | 0.653 | 0.659 | 0.665 | 0.67  | 0.676 | 0.682 | 0.689 | 0.693 |       |
| Maranhão                     | 0.309 | 0.314 | 0.319 | 0.324 | 0.329 | 0.333 | 0.341 | 0.352 | 0.361 | 0.371 | 0.38  | 0.387 | 0.393 | 0.403 | 0.413 | 0.424 | 0.435 | 0.446 | 0.457 | 0.468 | 0.479 | 0.488 | 0.496 | 0.503 | 0.511 | 0.517 | 0.525 | 0.533 | 0.541 | 0.549 | 0.557 | 0.566 | 0.574 | 0.581 | 0.588 | 0.595 | 0.6   |       |
| Minas Gerais                 | 0.45  | 0.462 | 0.473 | 0.483 | 0.493 | 0.503 | 0.512 | 0.518 | 0.525 | 0.532 | 0.539 | 0.546 | 0.552 | 0.559 | 0.566 | 0.574 | 0.582 | 0.589 | 0.596 | 0.603 | 0.609 | 0.615 | 0.621 | 0.627 | 0.632 | 0.638 | 0.643 | 0.65  | 0.656 | 0.661 | 0.668 | 0.674 | 0.68  | 0.686 | 0.692 | 0.697 | 0.702 |       |
| Mato Grosso do Sul           | 0.401 | 0.418 | 0.432 | 0.445 | 0.457 | 0.471 | 0.481 | 0.489 | 0.498 | 0.506 | 0.514 | 0.522 | 0.53  | 0.539 | 0.548 | 0.558 | 0.567 | 0.576 | 0.584 | 0.591 | 0.598 | 0.604 | 0.61  | 0.615 | 0.62  | 0.626 | 0.632 | 0.638 | 0.644 | 0.649 | 0.654 | 0.659 | 0.664 | 0.669 | 0.675 | 0.681 | 0.686 |       |
| Mato Grosso                  | 0.419 | 0.433 | 0.445 | 0.456 | 0.467 | 0.48  | 0.49  | 0.498 | 0.507 | 0.516 | 0.524 | 0.532 | 0.54  | 0.549 | 0.559 | 0.569 | 0.578 | 0.587 | 0.595 | 0.602 | 0.609 | 0.615 | 0.621 | 0.626 | 0.631 | 0.636 | 0.642 | 0.647 | 0.653 | 0.658 | 0.664 | 0.67  | 0.675 | 0.68  | 0.687 | 0.693 | 0.699 |       |
| Pará                         | 0.364 | 0.375 | 0.385 | 0.393 | 0.402 | 0.411 | 0.42  | 0.428 | 0.436 | 0.444 | 0.451 | 0.458 | 0.465 | 0.473 | 0.483 | 0.493 | 0.503 | 0.511 | 0.519 | 0.526 | 0.532 | 0.537 | 0.541 | 0.545 | 0.549 | 0.554 | 0.56  | 0.566 | 0.574 | 0.581 | 0.589 | 0.597 | 0.605 | 0.612 | 0.619 | 0.625 | 0.63  |       |
| Paraíba                      | 0.325 | 0.337 | 0.347 | 0.356 | 0.365 | 0.372 | 0.384 | 0.399 | 0.412 | 0.424 | 0.436 | 0.444 | 0.451 | 0.459 | 0.467 | 0.476 | 0.486 | 0.495 | 0.504 | 0.512 | 0.519 | 0.527 | 0.533 | 0.54  | 0.546 | 0.553 | 0.559 | 0.567 | 0.574 | 0.581 | 0.589 | 0.596 | 0.603 | 0.61  | 0.616 | 0.622 | 0.627 |       |
| Paraná                       | 0.443 | 0.458 | 0.471 | 0.483 | 0.494 | 0.507 | 0.517 | 0.524 | 0.533 | 0.541 | 0.548 | 0.556 | 0.564 | 0.572 | 0.58  | 0.589 | 0.597 | 0.606 | 0.614 | 0.622 | 0.629 | 0.636 | 0.643 | 0.649 | 0.654 | 0.66  | 0.665 | 0.671 | 0.677 | 0.682 | 0.688 | 0.694 | 0.7   | 0.706 | 0.712 | 0.718 | 0.722 |       |
| Pernambuco                   | 0.364 | 0.377 | 0.387 | 0.396 | 0.405 | 0.414 | 0.425 | 0.437 | 0.448 | 0.458 | 0.468 | 0.477 | 0.485 | 0.492 | 0.5   | 0.508 | 0.516 | 0.523 | 0.53  | 0.536 | 0.543 | 0.549 | 0.555 | 0.561 | 0.567 | 0.573 | 0.579 | 0.585 | 0.592 | 0.598 | 0.605 | 0.611 | 0.617 | 0.623 | 0.63  | 0.636 | 0.64  |       |
| Piauí                        | 0.321 | 0.329 | 0.337 | 0.344 | 0.351 | 0.358 | 0.367 | 0.378 | 0.388 | 0.398 | 0.408 | 0.415 | 0.421 | 0.428 | 0.436 | 0.445 | 0.455 | 0.464 | 0.473 | 0.482 | 0.49  | 0.498 | 0.505 | 0.512 | 0.519 | 0.526 | 0.533 | 0.54  | 0.548 | 0.555 | 0.563 | 0.571 | 0.578 | 0.585 | 0.591 | 0.598 | 0.604 |       |
| Rio de Janeiro               | 0.531 | 0.545 | 0.557 | 0.567 | 0.577 | 0.587 | 0.595 | 0.602 | 0.608 | 0.615 | 0.62  | 0.626 | 0.631 | 0.637 | 0.642 | 0.648 | 0.653 | 0.659 | 0.665 | 0.67  | 0.676 | 0.682 | 0.688 | 0.692 | 0.696 | 0.701 | 0.705 | 0.71  | 0.714 | 0.718 | 0.723 | 0.727 | 0.732 | 0.736 | 0.74  | 0.745 | 0.749 |       |
| Rio Grande do Norte          | 0.357 | 0.369 | 0.38  | 0.39  | 0.4   | 0.409 | 0.42  | 0.431 | 0.442 | 0.452 | 0.461 | 0.469 | 0.477 | 0.485 | 0.494 | 0.504 | 0.515 | 0.524 | 0.531 | 0.539 | 0.546 | 0.554 | 0.562 | 0.568 | 0.575 | 0.582 | 0.589 | 0.596 | 0.603 | 0.61  | 0.618 | 0.625 | 0.632 | 0.639 | 0.645 | 0.651 | 0.656 |       |
| Rondônia                     | 0.358 | 0.373 | 0.386 | 0.398 | 0.41  | 0.422 | 0.434 | 0.446 | 0.457 | 0.467 | 0.477 | 0.486 | 0.494 | 0.502 | 0.511 | 0.519 | 0.528 | 0.536 | 0.545 | 0.552 | 0.56  | 0.568 | 0.575 | 0.582 | 0.589 | 0.597 | 0.604 | 0.612 | 0.619 | 0.626 | 0.633 | 0.64  | 0.646 | 0.653 | 0.66  | 0.666 | 0.671 |       |
| Roraima                      | 0.401 | 0.411 | 0.421 | 0.43  | 0.44  | 0.45  | 0.461 | 0.472 | 0.483 | 0.493 | 0.503 | 0.512 | 0.52  | 0.527 | 0.535 | 0.542 | 0.548 | 0.552 | 0.558 | 0.569 | 0.58  | 0.589 | 0.595 | 0.604 | 0.612 | 0.62  | 0.628 | 0.636 | 0.644 | 0.651 | 0.657 | 0.661 | 0.666 | 0.672 | 0.678 | 0.683 |       |       |
| Rio Grande do Sul            | 0.506 | 0.516 | 0.525 | 0.533 | 0.541 | 0.549 | 0.557 | 0.565 | 0.572 | 0.579 | 0.585 | 0.592 | 0.598 | 0.604 | 0.61  | 0.617 | 0.622 | 0.628 | 0.635 | 0.641 | 0.647 | 0.654 | 0.66  | 0.665 | 0.671 | 0.676 | 0.682 | 0.688 | 0.693 | 0.698 | 0.703 | 0.708 | 0.712 | 0.717 | 0.722 | 0.727 | 0.732 | 0.737 |
| Santa Catarina               | 0.477 | 0.489 | 0.499 | 0.508 | 0.517 | 0.526 | 0.536 | 0.544 | 0.553 | 0.561 | 0.569 | 0.577 | 0.584 | 0.592 | 0.6   | 0.609 | 0.617 | 0.624 | 0.632 | 0.639 | 0.647 | 0.654 | 0.66  | 0.665 | 0.671 | 0.676 | 0.681 | 0.687 | 0.693 | 0.698 | 0.704 | 0.711 | 0.716 | 0.722 | 0.729 | 0.735 | 0.74  |       |
| Sergipe                      | 0.336 | 0.35  | 0.361 | 0.372 | 0.382 | 0.391 | 0.403 | 0.417 | 0.43  | 0.443 | 0.453 | 0.463 | 0.472 | 0.481 | 0.49  | 0.501 | 0.511 | 0.52  | 0.529 | 0.537 | 0.546 | 0.554 | 0.562 | 0.569 | 0.576 | 0.582 | 0.589 | 0.596 | 0.603 | 0.611 | 0.619 | 0.627 | 0.634 | 0.641 | 0.648 | 0.654 | 0.659 |       |
| São Paulo                    | 0.53  | 0.542 | 0.552 | 0.561 | 0.571 | 0.581 | 0.589 | 0.596 | 0.602 | 0.609 | 0.615 | 0.621 | 0.628 | 0.634 | 0.64  | 0.647 | 0.653 | 0.659 | 0.666 | 0.672 | 0.679 | 0.686 | 0.692 | 0.697 | 0.702 | 0.706 | 0.711 | 0.716 | 0.721 | 0.726 | 0.73  | 0.736 | 0.74  | 0.745 | 0.75  | 0.756 | 0.76  |       |
| Tocantins                    | 0.38  | 0.389 | 0.398 | 0.406 | 0.415 | 0.424 | 0.434 | 0.443 | 0.452 | 0.461 | 0.469 | 0.477 | 0.486 | 0.494 | 0.502 | 0.511 | 0.521 | 0.53  | 0.539 | 0.547 | 0.556 | 0.563 | 0.571 | 0.578 | 0.584 | 0.591 | 0.597 | 0.604 | 0.612 | 0.619 | 0.626 | 0.634 | 0.642 | 0.649 | 0.656 | 0.663 | 0.668 |       |
| North Africa and Middle East | 0.382 | 0.392 | 0.401 | 0.41  | 0.418 | 0.427 | 0.436 | 0.446 | 0.455 | 0.465 | 0.475 | 0.485 | 0.495 | 0.505 | 0.513 | 0.522 | 0.531 | 0.539 | 0.548 | 0.556 | 0.564 | 0.571 | 0.578 | 0.586 | 0.593 | 0.601 | 0.608 | 0.615 | 0.622 | 0.628 | 0.634 | 0.64  | 0.647 | 0.654 | 0.661 | 0.669 | 0.674 |       |
| North Africa and Middle East | 0.382 | 0.392 | 0.401 | 0.41  | 0.418 | 0.427 | 0.436 | 0.446 | 0.455 | 0.465 | 0.475 | 0.485 | 0.495 | 0.505 | 0.513 | 0.522 | 0.531 | 0.539 | 0.548 | 0.556 | 0.564 | 0.571 | 0.578 | 0.586 | 0.593 | 0.601 | 0.608 | 0.615 | 0.622 | 0.628 | 0.634 | 0.64  | 0.647 | 0.654 | 0.661 | 0.669 | 0.674 |       |
| Algeria                      | 0.356 | 0.367 | 0.379 | 0.39  | 0.401 | 0.412 | 0.423 | 0.433 | 0.443 | 0.453 | 0.463 | 0.472 | 0.479 | 0.485 | 0.49  | 0.495 | 0.5   | 0.505 | 0.51  | 0.516 | 0.523 | 0.53  | 0.538 | 0.549 | 0.559 | 0.57  | 0.581 | 0.591 | 0.602 | 0.612 | 0.622 | 0.632 | 0.642 | 0.651 | 0.66  | 0.669 | 0.676 |       |
| Bahrain                      | 0.498 | 0.513 | 0.526 | 0.536 | 0.54  | 0.542 | 0.55  | 0.559 | 0.565 | 0.571 | 0.586 | 0.599 | 0.605 | 0.613 | 0.623 | 0.633 | 0.641 | 0.644 | 0.646 | 0.65  | 0.663 | 0.681 | 0.694 | 0.701 | 0.703 | 0.707 | 0.711 | 0.716 | 0.719 | 0.72  | 0.719 | 0.718 | 0.721 | 0.726 | 0.732 | 0.738 |       |       |
| Egypt                        | 0.347 | 0.358 | 0.369 | 0.38  | 0.391 | 0.402 | 0.413 | 0.425 | 0.435 | 0.446 | 0.458 | 0.469 | 0.48  | 0.49  | 0.499 | 0.509 | 0.518 | 0.527 | 0.535 | 0.543 | 0.551 | 0.558 | 0.566 | 0.573 | 0.579 | 0.585 | 0.591 | 0.596 | 0.601 | 0.607 | 0.612 | 0.617 | 0.623 | 0.629 | 0.637 | 0.645 | 0.653 |       |
| Iran                         | 0.379 | 0.387 | 0.395 | 0.404 | 0.412 | 0.422 | 0.434 | 0.449 | 0.466 | 0.487 | 0.51  | 0.536 | 0.562 | 0.585 | 0.607 | 0.625 | 0.642 | 0.656 | 0.667 | 0.676 | 0.683 | 0.689 | 0.695 | 0.701 | 0.707 | 0.713 | 0.719 | 0.725 | 0.731 | 0.736 | 0.742 | 0.748 | 0.752 | 0.757 | 0.762 | 0.766 | 0.769 |       |
| Iraq                         | 0.289 | 0.299 | 0.31  | 0.32  | 0.331 | 0.341 | 0.351 | 0.361 | 0.372 | 0.381 | 0.391 | 0.398 | 0.405 | 0.412 | 0.418 | 0.423 | 0.429 | 0.437 | 0.447 | 0.459 | 0.472 | 0.485 | 0.495 | 0.498 | 0.498 | 0.492 | 0.485 | 0.475 | 0.461 | 0.447 | 0.434 | 0.429 | 0.432 | 0.44  | 0.45  | 0.463 | 0.474 |       |
| Jordan                       | 0.264 | 0.294 | 0.322 | 0.346 | 0.369 | 0.389 | 0.409 | 0.428 | 0.448 | 0.468 | 0.483 | 0.497 | 0.511 | 0.524 | 0.538 | 0.548 | 0.558 | 0.568 | 0.577 | 0.586 | 0.595 | 0.603 | 0.61  | 0.615 | 0.621 | 0.626 | 0.632 | 0.637 | 0.643 | 0.649 | 0.656 | 0.663 | 0.669 | 0.674 | 0.683 | 0.689 | 0.694 |       |
| Kuwait                       | 0.46  | 0.476 | 0.494 | 0.515 | 0.54  | 0.566 | 0.59  | 0.611 | 0.628 | 0.642 | 0.652 | 0.657 | 0.66  | 0.659 | 0.653 | 0.649 | 0.655 | 0.671 | 0.689 | 0.702 | 0.711 | 0.717 | 0.721 | 0.726 | 0.732 | 0.738 | 0.747 | 0.758 | 0.77  | 0.781 | 0.791 | 0.8   | 0.808 | 0.816 | 0.823 | 0.829 | 0.832 |       |
| Lebanon                      | 0.51  | 0.525 | 0.536 | 0.547 | 0.561 | 0.575 | 0.588 | 0.602 | 0.613 | 0.621 | 0.627 | 0.636 | 0.645 | 0.653 | 0.661 | 0.669 | 0.678 | 0.687 | 0.697 | 0.706 | 0.715 | 0.723 | 0.73  | 0.738 | 0.744 | 0.751 | 0.757 | 0.763 | 0.77  | 0.777 | 0.785 | 0.792 | 0.797 | 0.801 | 0.804 | 0.807 | 0.81  |       |
| Libya                        | 0.565 | 0.57  | 0.575 | 0.579 | 0.583 | 0.588 | 0.591 | 0.595 | 0.598 | 0.601 | 0.605 | 0.611 | 0.617 | 0.623 | 0.63  | 0.636 | 0.643 | 0.65  |       |       |       |       |       |       |       |       |       |       |       |       |       |       |       |       |       |       |       |       |

Appendix Table 14: Socio-Demographic Index values for all estimated GBD 2016 locations, 1980–2016

| Location          | 1980  | 1981  | 1982  | 1983  | 1984  | 1985  | 1986  | 1987  | 1988  | 1989  | 1990  | 1991  | 1992  | 1993  | 1994  | 1995  | 1996  | 1997  | 1998  | 1999  | 2000  | 2001  | 2002  | 2003  | 2004  | 2005  | 2006  | 2007  | 2008  | 2009  | 2010  | 2011  | 2012  | 2013  | 2014  | 2015  | 2016  |       |
|-------------------|-------|-------|-------|-------|-------|-------|-------|-------|-------|-------|-------|-------|-------|-------|-------|-------|-------|-------|-------|-------|-------|-------|-------|-------|-------|-------|-------|-------|-------|-------|-------|-------|-------|-------|-------|-------|-------|-------|
| South Asia        | 0.288 | 0.293 | 0.298 | 0.303 | 0.309 | 0.314 | 0.32  | 0.327 | 0.334 | 0.341 | 0.349 | 0.356 | 0.364 | 0.371 | 0.378 | 0.386 | 0.394 | 0.402 | 0.409 | 0.417 | 0.425 | 0.432 | 0.44  | 0.447 | 0.455 | 0.464 | 0.473 | 0.482 | 0.491 | 0.5   | 0.51  | 0.519 | 0.529 | 0.539 | 0.549 | 0.56  | 0.569 |       |
| Southern Asia     | 0.288 | 0.293 | 0.298 | 0.303 | 0.309 | 0.314 | 0.32  | 0.327 | 0.334 | 0.341 | 0.349 | 0.356 | 0.364 | 0.371 | 0.378 | 0.386 | 0.394 | 0.402 | 0.409 | 0.417 | 0.425 | 0.432 | 0.44  | 0.447 | 0.455 | 0.464 | 0.473 | 0.482 | 0.491 | 0.5   | 0.51  | 0.519 | 0.529 | 0.539 | 0.549 | 0.56  | 0.569 |       |
| Bangladesh        | 0.254 | 0.258 | 0.263 | 0.269 | 0.275 | 0.281 | 0.287 | 0.294 | 0.3   | 0.307 | 0.315 | 0.323 | 0.331 | 0.339 | 0.347 | 0.355 | 0.363 | 0.371 | 0.378 | 0.386 | 0.394 | 0.402 | 0.41  | 0.418 | 0.426 | 0.434 | 0.442 | 0.45  | 0.459 | 0.467 | 0.476 | 0.485 | 0.494 | 0.503 | 0.511 |       |       |       |
| Bhutan            | 0.237 | 0.242 | 0.247 | 0.253 | 0.259 | 0.265 | 0.272 | 0.279 | 0.286 | 0.293 | 0.301 | 0.31  | 0.318 | 0.327 | 0.337 | 0.348 | 0.359 | 0.37  | 0.382 | 0.394 | 0.406 | 0.418 | 0.431 | 0.444 | 0.457 | 0.47  | 0.482 | 0.494 | 0.506 | 0.518 | 0.53  | 0.541 | 0.552 | 0.563 | 0.572 | 0.581 | 0.588 |       |
| India             | 0.298 | 0.303 | 0.308 | 0.313 | 0.318 | 0.324 | 0.329 | 0.336 | 0.342 | 0.35  | 0.357 | 0.364 | 0.371 | 0.378 | 0.385 | 0.393 | 0.401 | 0.408 | 0.416 | 0.424 | 0.432 | 0.44  | 0.447 | 0.455 | 0.464 | 0.473 | 0.482 | 0.492 | 0.502 | 0.512 | 0.522 | 0.533 | 0.543 | 0.553 | 0.563 | 0.575 | 0.584 |       |
| Nepal             | 0.194 | 0.198 | 0.202 | 0.206 | 0.21  | 0.214 | 0.219 | 0.224 | 0.23  | 0.236 | 0.242 | 0.25  | 0.258 | 0.266 | 0.276 | 0.285 | 0.293 | 0.302 | 0.31  | 0.319 | 0.328 | 0.337 | 0.346 | 0.354 | 0.362 | 0.37  | 0.377 | 0.384 | 0.391 | 0.398 | 0.404 | 0.411 | 0.417 | 0.424 | 0.433 | 0.443 | 0.452 |       |
| Pakistan          | 0.216 | 0.218 | 0.22  | 0.223 | 0.227 | 0.234 | 0.243 | 0.255 | 0.268 | 0.282 | 0.297 | 0.309 | 0.32  | 0.33  | 0.339 | 0.349 | 0.36  | 0.371 | 0.383 | 0.392 | 0.4   | 0.408 | 0.416 | 0.424 | 0.431 | 0.438 | 0.443 | 0.448 | 0.453 | 0.458 | 0.464 | 0.471 | 0.478 | 0.488 | 0.499 | 0.51  | 0.519 |       |
| Andhra Pradesh    | 0.276 | 0.281 | 0.285 | 0.29  | 0.294 | 0.299 | 0.303 | 0.309 | 0.315 | 0.322 | 0.329 | 0.337 | 0.345 | 0.354 | 0.363 | 0.373 | 0.383 | 0.393 | 0.403 | 0.414 | 0.424 | 0.434 | 0.444 | 0.453 | 0.463 | 0.472 | 0.481 | 0.493 | 0.503 | 0.514 | 0.525 | 0.536 | 0.546 | 0.556 | 0.566 | 0.577 | 0.585 |       |
| Arunachal Pradesh | 0.263 | 0.269 | 0.274 | 0.28  | 0.286 | 0.292 | 0.3   | 0.307 | 0.315 | 0.322 | 0.33  | 0.338 | 0.346 | 0.354 | 0.362 | 0.371 | 0.38  | 0.389 | 0.397 | 0.405 | 0.413 | 0.422 | 0.43  | 0.438 | 0.447 | 0.457 | 0.466 | 0.477 | 0.487 | 0.5   | 0.513 | 0.526 | 0.539 | 0.552 | 0.565 | 0.578 | 0.589 |       |
| Assam             | 0.292 | 0.298 | 0.304 | 0.311 | 0.318 | 0.325 | 0.332 | 0.339 | 0.346 | 0.353 | 0.361 | 0.367 | 0.373 | 0.378 | 0.383 | 0.389 | 0.394 | 0.4   | 0.405 | 0.413 | 0.421 | 0.429 | 0.437 | 0.446 | 0.454 | 0.462 | 0.471 | 0.479 | 0.487 | 0.496 | 0.504 | 0.514 | 0.523 | 0.532 | 0.542 | 0.552 | 0.562 |       |
| Bihar             | 0.25  | 0.255 | 0.26  | 0.264 | 0.27  | 0.275 | 0.281 | 0.287 | 0.294 | 0.3   | 0.306 | 0.312 | 0.317 | 0.318 | 0.319 | 0.318 | 0.318 | 0.319 | 0.317 | 0.317 | 0.317 | 0.318 | 0.321 | 0.325 | 0.329 | 0.334 | 0.338 | 0.346 | 0.354 | 0.363 | 0.371 | 0.38  | 0.39  | 0.4   | 0.411 | 0.421 | 0.431 | 0.44  |
| Chhattisgarh      | 0.256 | 0.26  | 0.264 | 0.269 | 0.273 | 0.277 | 0.282 | 0.287 | 0.292 | 0.298 | 0.304 | 0.31  | 0.316 | 0.323 | 0.329 | 0.336 | 0.344 | 0.352 | 0.36  | 0.369 | 0.376 | 0.382 | 0.389 | 0.395 | 0.405 | 0.414 | 0.425 | 0.436 | 0.449 | 0.461 | 0.473 | 0.485 | 0.497 | 0.509 | 0.521 | 0.534 | 0.547 | 0.558 |
| Delhi             | 0.471 | 0.478 | 0.484 | 0.49  | 0.495 | 0.5   | 0.505 | 0.51  | 0.515 | 0.52  | 0.524 | 0.529 | 0.533 | 0.538 | 0.544 | 0.55  | 0.557 | 0.565 | 0.573 | 0.582 | 0.592 | 0.602 | 0.612 | 0.623 | 0.633 | 0.643 | 0.653 | 0.664 | 0.674 | 0.684 | 0.694 | 0.705 | 0.715 | 0.724 | 0.734 | 0.744 | 0.752 |       |
| Goa               | 0.394 | 0.401 | 0.409 | 0.416 | 0.424 | 0.432 | 0.44  | 0.448 | 0.456 | 0.465 | 0.473 | 0.481 | 0.49  | 0.5   | 0.511 | 0.523 | 0.535 | 0.547 | 0.561 | 0.573 | 0.586 | 0.597 | 0.608 | 0.616 | 0.623 | 0.631 | 0.638 | 0.645 | 0.654 | 0.664 | 0.673 | 0.681 | 0.689 | 0.697 | 0.718 | 0.729 | 0.738 |       |
| Gujarat           | 0.319 | 0.326 | 0.331 | 0.338 | 0.345 | 0.352 | 0.359 | 0.365 | 0.373 | 0.38  | 0.389 | 0.395 | 0.403 | 0.411 | 0.42  | 0.429 | 0.439 | 0.448 | 0.457 | 0.465 | 0.473 | 0.48  | 0.487 | 0.495 | 0.503 | 0.512 | 0.522 | 0.532 | 0.542 | 0.551 | 0.561 | 0.571 | 0.58  | 0.589 | 0.598 | 0.607 | 0.615 |       |
| Haryana           | 0.317 | 0.324 | 0.331 | 0.338 | 0.345 | 0.353 | 0.361 | 0.368 | 0.377 | 0.386 | 0.395 | 0.405 | 0.413 | 0.422 | 0.431 | 0.439 | 0.449 | 0.458 | 0.467 | 0.475 | 0.484 | 0.494 | 0.503 | 0.513 | 0.524 | 0.534 | 0.545 | 0.557 | 0.569 | 0.58  | 0.591 | 0.602 | 0.613 | 0.624 | 0.635 | 0.646 | 0.655 |       |
| Himachal Pradesh  | 0.289 | 0.296 | 0.303 | 0.311 | 0.318 | 0.326 | 0.334 | 0.343 | 0.353 | 0.363 | 0.374 | 0.385 | 0.396 | 0.407 | 0.419 | 0.433 | 0.443 | 0.456 | 0.469 | 0.483 | 0.496 | 0.508 | 0.52  | 0.531 | 0.541 | 0.553 | 0.564 | 0.575 | 0.587 | 0.598 | 0.61  | 0.622 | 0.633 | 0.644 | 0.654 | 0.662 | 0.669 |       |
| Jammu and Kashmir | 0.276 | 0.282 | 0.288 | 0.295 | 0.301 | 0.308 | 0.316 | 0.322 | 0.329 | 0.336 | 0.343 | 0.349 | 0.353 | 0.361 | 0.369 | 0.377 | 0.384 | 0.395 | 0.405 | 0.417 | 0.429 | 0.441 | 0.452 | 0.464 | 0.475 | 0.486 | 0.497 | 0.507 | 0.518 | 0.528 | 0.539 | 0.549 | 0.559 | 0.569 | 0.579 | 0.589 | 0.598 |       |
| Jharkhand         | 0.259 | 0.262 | 0.266 | 0.269 | 0.273 | 0.277 | 0.281 | 0.285 | 0.29  | 0.295 | 0.3   | 0.306 | 0.311 | 0.316 | 0.322 | 0.329 | 0.334 | 0.342 | 0.35  | 0.358 | 0.365 | 0.373 | 0.381 | 0.389 | 0.397 | 0.406 | 0.415 | 0.424 | 0.433 | 0.442 | 0.453 | 0.464 | 0.475 | 0.487 | 0.499 | 0.512 | 0.523 |       |
| Karnataka         | 0.296 | 0.301 | 0.306 | 0.312 | 0.318 | 0.324 | 0.33  | 0.337 | 0.344 | 0.352 | 0.36  | 0.368 | 0.376 | 0.385 | 0.395 | 0.405 | 0.415 | 0.425 | 0.436 | 0.447 | 0.457 | 0.465 | 0.474 | 0.481 | 0.49  | 0.499 | 0.509 | 0.521 | 0.532 | 0.543 | 0.554 | 0.565 | 0.576 | 0.586 | 0.596 | 0.606 | 0.614 |       |
| Kerala            | 0.369 | 0.374 | 0.379 | 0.385 | 0.391 | 0.396 | 0.403 | 0.409 | 0.415 | 0.422 | 0.429 | 0.436 | 0.444 | 0.454 | 0.464 | 0.476 | 0.488 | 0.5   | 0.512 | 0.524 | 0.535 | 0.545 | 0.553 | 0.562 | 0.57  | 0.58  | 0.589 | 0.599 | 0.608 | 0.619 | 0.628 | 0.638 | 0.648 | 0.657 | 0.667 | 0.676 | 0.683 |       |
| Madhya Pradesh    | 0.271 | 0.275 | 0.28  | 0.286 | 0.291 | 0.297 | 0.303 | 0.309 | 0.317 | 0.324 | 0.332 | 0.339 | 0.345 | 0.35  | 0.355 | 0.36  | 0.365 | 0.37  | 0.375 | 0.38  | 0.385 | 0.391 | 0.397 | 0.404 | 0.411 | 0.418 | 0.425 | 0.433 | 0.441 | 0.45  | 0.459 | 0.47  | 0.481 | 0.494 | 0.507 | 0.52  | 0.532 |       |
| Maharashtra       | 0.339 | 0.346 | 0.353 | 0.36  | 0.368 | 0.375 | 0.383 | 0.391 | 0.399 | 0.408 | 0.418 | 0.426 | 0.435 | 0.444 | 0.454 | 0.464 | 0.475 | 0.485 | 0.494 | 0.503 | 0.512 | 0.519 | 0.526 | 0.534 | 0.543 | 0.553 | 0.564 | 0.576 | 0.588 | 0.599 | 0.61  | 0.62  | 0.63  | 0.639 | 0.648 | 0.658 | 0.666 |       |
| Manipur           | 0.28  | 0.288 | 0.295 | 0.302 | 0.31  | 0.318 | 0.326 | 0.336 | 0.346 | 0.355 | 0.364 | 0.372 | 0.38  | 0.386 | 0.391 | 0.395 | 0.4   | 0.406 | 0.413 | 0.423 | 0.433 | 0.444 | 0.455 | 0.467 | 0.48  | 0.494 | 0.507 | 0.518 | 0.529 | 0.54  | 0.549 | 0.56  | 0.571 | 0.581 | 0.591 | 0.601 | 0.61  |       |
| Meghalaya         | 0.287 | 0.291 | 0.296 | 0.3   | 0.305 | 0.31  | 0.316 | 0.323 | 0.328 | 0.335 | 0.342 | 0.348 | 0.353 | 0.358 | 0.36  | 0.363 | 0.367 | 0.372 | 0.379 | 0.389 | 0.402 | 0.417 | 0.431 | 0.443 | 0.455 | 0.467 | 0.477 | 0.488 | 0.498 | 0.508 | 0.519 | 0.53  | 0.541 | 0.552 | 0.563 | 0.575 | 0.585 |       |
| Mizoram           | 0.334 | 0.34  | 0.346 | 0.352 | 0.359 | 0.369 | 0.378 | 0.39  | 0.399 | 0.407 | 0.414 | 0.422 | 0.43  | 0.44  | 0.446 | 0.453 | 0.459 | 0.465 | 0.473 | 0.482 | 0.492 | 0.502 | 0.511 | 0.52  | 0.528 | 0.537 | 0.545 | 0.553 | 0.562 | 0.572 | 0.581 | 0.591 | 0.601 | 0.611 | 0.621 | 0.63  |       |       |
| Nagaland          | 0.343 | 0.348 | 0.354 | 0.36  | 0.366 | 0.371 | 0.377 | 0.383 | 0.389 | 0.395 | 0.401 | 0.406 | 0.409 | 0.413 | 0.416 | 0.419 | 0.422 | 0.428 | 0.434 | 0.442 | 0.456 | 0.473 | 0.49  | 0.505 | 0.519 | 0.533 | 0.545 | 0.559 | 0.572 | 0.585 | 0.597 | 0.61  | 0.622 | 0.634 | 0.645 | 0.654 | 0.661 |       |
| Odisha            | 0.251 | 0.255 | 0.259 | 0.264 | 0.269 | 0.274 | 0.28  | 0.285 | 0.292 | 0.299 | 0.305 | 0.312 | 0.318 | 0.324 | 0.33  | 0.338 | 0.344 | 0.351 | 0.359 | 0.368 | 0.376 | 0.385 | 0.393 | 0.402 | 0.413 | 0.422 | 0.433 | 0.445 | 0.457 | 0.468 | 0.48  | 0.491 | 0.503 | 0.514 | 0.526 | 0.537 | 0.547 |       |
| Punjab            | 0.329 | 0.337 | 0.344 | 0.352 | 0.359 | 0.367 | 0.375 | 0.383 | 0.392 | 0.401 | 0.409 | 0.418 | 0.427 | 0.436 | 0.445 | 0.455 | 0.465 | 0.474 | 0.484 | 0.493 | 0.503 | 0.511 | 0.519 | 0.527 | 0.535 | 0.545 | 0.555 | 0.566 | 0.576 | 0.587 | 0.598 | 0.608 | 0.618 | 0.627 | 0.636 | 0.643 | 0.65  |       |
| Rajasthan         | 0.254 | 0.259 | 0.263 | 0.27  | 0.275 | 0.28  | 0.286 | 0.292 | 0.299 | 0.306 | 0.315 | 0.322 | 0.329 | 0.335 | 0.341 | 0.348 | 0.355 | 0.362 | 0.368 | 0.375 | 0.382 | 0.39  | 0.397 | 0.405 | 0.414 | 0.422 | 0.43  | 0.44  | 0.449 | 0.457 | 0.468 | 0.479 | 0.49  | 0.5   | 0.511 | 0.521 | 0.53  |       |
| Sikkim            | 0.268 | 0.273 | 0.279 | 0.284 | 0.29  | 0.297 | 0.304 | 0.313 | 0.321 | 0.329 | 0.337 | 0.346 | 0.352 | 0.361 | 0.369 | 0.378 | 0.388 | 0.398 | 0.408 | 0.418 | 0.43  | 0.441 | 0.453 | 0.466 | 0.478 | 0.49  | 0.501 | 0.511 | 0.52  | 0.536 | 0.551 | 0.565 | 0.579 | 0.593 | 0.607 | 0.62  | 0.632 |       |
| Tamil Nadu        | 0.309 | 0.315 | 0.319 | 0.325 | 0.33  | 0.337 | 0.343 | 0.351 | 0.359 | 0.367 | 0.376 | 0.385 | 0.395 | 0.405 | 0.417 | 0.428 | 0.44  | 0.452 | 0.464 | 0.476 | 0.487 | 0.496 | 0.505 | 0.513 | 0.521 | 0.531 |       |       |       |       |       |       |       |       |       |       |       |       |



Appendix Table 14: Socio-Demographic Index values for all estimated GBD 2016 locations, 1980–2016

| Location                 | 1980  | 1981  | 1982  | 1983  | 1984  | 1985  | 1986  | 1987  | 1988  | 1989  | 1990  | 1991  | 1992  | 1993  | 1994  | 1995  | 1996  | 1997  | 1998  | 1999  | 2000  | 2001  | 2002  | 2003  | 2004  | 2005  | 2006  | 2007  | 2008  | 2009  | 2010  | 2011  | 2012  | 2013  | 2014  | 2015  | 2016  |
|--------------------------|-------|-------|-------|-------|-------|-------|-------|-------|-------|-------|-------|-------|-------|-------|-------|-------|-------|-------|-------|-------|-------|-------|-------|-------|-------|-------|-------|-------|-------|-------|-------|-------|-------|-------|-------|-------|-------|
| Himachal Pradesh, Rural  | 0.275 | 0.282 | 0.289 | 0.297 | 0.304 | 0.312 | 0.32  | 0.329 | 0.339 | 0.349 | 0.36  | 0.37  | 0.381 | 0.393 | 0.404 | 0.416 | 0.429 | 0.442 | 0.455 | 0.469 | 0.482 | 0.495 | 0.506 | 0.517 | 0.528 | 0.539 | 0.551 | 0.563 | 0.574 | 0.585 | 0.598 | 0.61  | 0.621 | 0.632 | 0.643 | 0.652 | 0.659 |
| Jammu and Kashmir, Urban | 0.366 | 0.374 | 0.383 | 0.392 | 0.401 | 0.411 | 0.42  | 0.428 | 0.437 | 0.444 | 0.451 | 0.457 | 0.462 | 0.47  | 0.478 | 0.486 | 0.494 | 0.506 | 0.515 | 0.528 | 0.54  | 0.551 | 0.562 | 0.572 | 0.581 | 0.59  | 0.599 | 0.607 | 0.615 | 0.623 | 0.631 | 0.636 | 0.643 | 0.65  | 0.657 | 0.664 | 0.671 |
| Jammu and Kashmir, Rural | 0.247 | 0.252 | 0.258 | 0.263 | 0.269 | 0.275 | 0.282 | 0.287 | 0.294 | 0.301 | 0.307 | 0.312 | 0.317 | 0.324 | 0.332 | 0.339 | 0.346 | 0.357 | 0.366 | 0.378 | 0.389 | 0.4   | 0.412 | 0.423 | 0.435 | 0.446 | 0.458 | 0.468 | 0.479 | 0.49  | 0.5   | 0.511 | 0.522 | 0.532 | 0.543 | 0.553 | 0.562 |
| Jharkhand, Urban         | 0.453 | 0.457 | 0.462 | 0.466 | 0.469 | 0.472 | 0.476 | 0.479 | 0.483 | 0.487 | 0.492 | 0.497 | 0.502 | 0.508 | 0.514 | 0.521 | 0.527 | 0.536 | 0.545 | 0.554 | 0.561 | 0.569 | 0.577 | 0.584 | 0.591 | 0.599 | 0.607 | 0.615 | 0.622 | 0.63  | 0.638 | 0.646 | 0.653 | 0.659 | 0.666 | 0.673 | 0.679 |
| Jharkhand, Rural         | 0.233 | 0.236 | 0.239 | 0.242 | 0.245 | 0.248 | 0.251 | 0.255 | 0.259 | 0.264 | 0.269 | 0.274 | 0.279 | 0.285 | 0.292 | 0.299 | 0.305 | 0.313 | 0.321 | 0.33  | 0.338 | 0.346 | 0.354 | 0.362 | 0.37  | 0.379 | 0.387 | 0.397 | 0.405 | 0.415 | 0.425 | 0.436 | 0.448 | 0.459 | 0.472 | 0.485 | 0.496 |
| Karnataka, Urban         | 0.391 | 0.398 | 0.404 | 0.412 | 0.42  | 0.428 | 0.434 | 0.441 | 0.449 | 0.456 | 0.463 | 0.471 | 0.478 | 0.486 | 0.495 | 0.505 | 0.515 | 0.525 | 0.536 | 0.546 | 0.557 | 0.565 | 0.574 | 0.582 | 0.589 | 0.597 | 0.605 | 0.613 | 0.621 | 0.629 | 0.638 | 0.646 | 0.655 | 0.664 | 0.672 | 0.681 | 0.688 |
| Karnataka, Rural         | 0.251 | 0.256 | 0.26  | 0.264 | 0.269 | 0.274 | 0.28  | 0.286 | 0.292 | 0.299 | 0.306 | 0.314 | 0.322 | 0.33  | 0.339 | 0.348 | 0.357 | 0.367 | 0.377 | 0.387 | 0.397 | 0.406 | 0.415 | 0.423 | 0.432 | 0.442 | 0.453 | 0.464 | 0.475 | 0.485 | 0.496 | 0.507 | 0.518 | 0.529 | 0.54  | 0.552 | 0.561 |
| Kerala, Urban            | 0.408 | 0.412 | 0.417 | 0.422 | 0.428 | 0.432 | 0.438 | 0.443 | 0.448 | 0.454 | 0.46  | 0.466 | 0.474 | 0.483 | 0.494 | 0.506 | 0.518 | 0.53  | 0.542 | 0.554 | 0.565 | 0.574 | 0.582 | 0.589 | 0.597 | 0.605 | 0.613 | 0.621 | 0.629 | 0.638 | 0.646 | 0.655 | 0.664 | 0.673 | 0.683 | 0.692 | 0.699 |
| Kerala, Rural            | 0.358 | 0.363 | 0.368 | 0.374 | 0.38  | 0.385 | 0.391 | 0.397 | 0.404 | 0.411 | 0.418 | 0.425 | 0.433 | 0.442 | 0.452 | 0.464 | 0.476 | 0.488 | 0.5   | 0.513 | 0.524 | 0.534 | 0.543 | 0.551 | 0.559 | 0.568 | 0.577 | 0.586 | 0.595 | 0.605 | 0.613 | 0.623 | 0.632 | 0.642 | 0.653 | 0.662 | 0.669 |
| Madhya Pradesh, Urban    | 0.403 | 0.409 | 0.415 | 0.422 | 0.428 | 0.435 | 0.441 | 0.448 | 0.455 | 0.461 | 0.469 | 0.476 | 0.483 | 0.49  | 0.497 | 0.504 | 0.511 | 0.517 | 0.522 | 0.527 | 0.531 | 0.535 | 0.538 | 0.541 | 0.545 | 0.55  | 0.557 | 0.564 | 0.572 | 0.581 | 0.591 | 0.6   | 0.609 | 0.618 | 0.626 | 0.635 | 0.643 |
| Madhya Pradesh, Rural    | 0.229 | 0.232 | 0.236 | 0.24  | 0.245 | 0.249 | 0.254 | 0.26  | 0.266 | 0.272 | 0.28  | 0.286 | 0.292 | 0.296 | 0.3   | 0.305 | 0.309 | 0.314 | 0.318 | 0.322 | 0.325 | 0.331 | 0.336 | 0.342 | 0.349 | 0.355 | 0.362 | 0.37  | 0.378 | 0.388 | 0.399 | 0.411 | 0.423 | 0.436 | 0.451 | 0.465 | 0.478 |
| Maharashtra, Urban       | 0.421 | 0.428 | 0.436 | 0.444 | 0.451 | 0.458 | 0.465 | 0.472 | 0.478 | 0.486 | 0.493 | 0.499 | 0.506 | 0.514 | 0.522 | 0.531 | 0.54  | 0.55  | 0.558 | 0.568 | 0.578 | 0.584 | 0.591 | 0.598 | 0.606 | 0.616 | 0.627 | 0.638 | 0.648 | 0.658 | 0.668 | 0.678 | 0.695 | 0.703 | 0.712 | 0.719 |       |
| Maharashtra, Rural       | 0.288 | 0.295 | 0.301 | 0.308 | 0.314 | 0.322 | 0.329 | 0.337 | 0.345 | 0.354 | 0.364 | 0.373 | 0.382 | 0.391 | 0.4   | 0.41  | 0.421 | 0.43  | 0.439 | 0.449 | 0.457 | 0.464 | 0.472 | 0.48  | 0.488 | 0.498 | 0.51  | 0.522 | 0.533 | 0.544 | 0.556 | 0.567 | 0.577 | 0.586 | 0.596 | 0.607 | 0.615 |
| Manipur, Urban           | 0.346 | 0.353 | 0.361 | 0.369 | 0.378 | 0.385 | 0.393 | 0.402 | 0.411 | 0.419 | 0.427 | 0.434 | 0.441 | 0.447 | 0.453 | 0.458 | 0.465 | 0.472 | 0.479 | 0.489 | 0.498 | 0.509 | 0.519 | 0.53  | 0.541 | 0.554 | 0.564 | 0.574 | 0.582 | 0.592 | 0.6   | 0.609 | 0.618 | 0.627 | 0.636 | 0.643 | 0.65  |
| Manipur, Rural           | 0.265 | 0.272 | 0.278 | 0.285 | 0.292 | 0.299 | 0.306 | 0.315 | 0.324 | 0.332 | 0.341 | 0.349 | 0.356 | 0.362 | 0.367 | 0.371 | 0.375 | 0.381 | 0.387 | 0.397 | 0.408 | 0.419 | 0.43  | 0.442 | 0.455 | 0.469 | 0.482 | 0.494 | 0.504 | 0.515 | 0.525 | 0.535 | 0.545 | 0.555 | 0.565 | 0.575 | 0.585 |
| Meghalaya, Urban         | 0.456 | 0.459 | 0.46  | 0.462 | 0.463 | 0.465 | 0.466 | 0.468 | 0.469 | 0.471 | 0.473 | 0.474 | 0.476 | 0.478 | 0.484 | 0.49  | 0.498 | 0.506 | 0.516 | 0.529 | 0.545 | 0.559 | 0.572 | 0.584 | 0.595 | 0.605 | 0.613 | 0.621 | 0.63  | 0.638 | 0.648 | 0.657 | 0.667 | 0.677 | 0.687 | 0.696 |       |
| Meghalaya, Rural         | 0.25  | 0.254 | 0.258 | 0.263 | 0.268 | 0.273 | 0.279 | 0.286 | 0.292 | 0.299 | 0.307 | 0.313 | 0.319 | 0.323 | 0.325 | 0.328 | 0.331 | 0.336 | 0.342 | 0.352 | 0.365 | 0.379 | 0.393 | 0.406 | 0.417 | 0.429 | 0.44  | 0.451 | 0.461 | 0.472 | 0.483 | 0.495 | 0.505 | 0.516 | 0.528 | 0.54  | 0.55  |
| Mizoram, Urban           | 0.383 | 0.389 | 0.395 | 0.401 | 0.408 | 0.417 | 0.426 | 0.437 | 0.446 | 0.453 | 0.459 | 0.466 | 0.472 | 0.479 | 0.485 | 0.492 | 0.5   | 0.508 | 0.514 | 0.522 | 0.531 | 0.54  | 0.548 | 0.555 | 0.562 | 0.568 | 0.575 | 0.581 | 0.587 | 0.593 | 0.601 | 0.608 | 0.616 | 0.625 | 0.633 | 0.643 | 0.651 |
| Mizoram, Rural           | 0.292 | 0.298 | 0.303 | 0.309 | 0.315 | 0.325 | 0.334 | 0.346 | 0.355 | 0.363 | 0.37  | 0.378 | 0.385 | 0.392 | 0.395 | 0.398 | 0.404 | 0.408 | 0.413 | 0.42  | 0.43  | 0.44  | 0.451 | 0.461 | 0.472 | 0.482 | 0.491 | 0.502 | 0.512 | 0.523 | 0.535 | 0.546 | 0.557 | 0.568 | 0.58  | 0.591 | 0.6   |
| Nagaland, Urban          | 0.446 | 0.451 | 0.458 | 0.466 | 0.473 | 0.48  | 0.486 | 0.494 | 0.501 | 0.507 | 0.513 | 0.517 | 0.521 | 0.525 | 0.527 | 0.53  | 0.532 | 0.536 | 0.54  | 0.544 | 0.553 | 0.564 | 0.576 | 0.586 | 0.595 | 0.604 | 0.612 | 0.622 | 0.632 | 0.641 | 0.65  | 0.66  | 0.67  | 0.68  | 0.691 | 0.702 | 0.711 |
| Nagaland, Rural          | 0.328 | 0.333 | 0.338 | 0.343 | 0.348 | 0.353 | 0.357 | 0.363 | 0.368 | 0.374 | 0.379 | 0.383 | 0.387 | 0.39  | 0.393 | 0.395 | 0.399 | 0.405 | 0.412 | 0.42  | 0.435 | 0.452 | 0.469 | 0.484 | 0.498 | 0.512 | 0.524 | 0.537 | 0.55  | 0.563 | 0.575 | 0.588 | 0.6   | 0.611 | 0.622 | 0.629 | 0.637 |
| Odisha, Urban            | 0.37  | 0.376 | 0.382 | 0.389 | 0.396 | 0.403 | 0.411 | 0.417 | 0.424 | 0.432 | 0.438 | 0.444 | 0.45  | 0.455 | 0.461 | 0.469 | 0.474 | 0.481 | 0.488 | 0.496 | 0.504 | 0.512 | 0.519 | 0.527 | 0.536 | 0.544 | 0.552 | 0.561 | 0.569 | 0.575 | 0.583 | 0.591 | 0.599 | 0.608 | 0.617 | 0.627 | 0.635 |
| Odisha, Rural            | 0.233 | 0.237 | 0.24  | 0.245 | 0.248 | 0.253 | 0.259 | 0.263 | 0.269 | 0.276 | 0.281 | 0.287 | 0.293 | 0.299 | 0.305 | 0.312 | 0.318 | 0.325 | 0.333 | 0.341 | 0.35  | 0.358 | 0.366 | 0.376 | 0.387 | 0.397 | 0.408 | 0.42  | 0.432 | 0.443 | 0.455 | 0.467 | 0.479 | 0.49  | 0.502 | 0.514 | 0.524 |
| Punjab, Urban            | 0.441 | 0.449 | 0.456 | 0.463 | 0.47  | 0.477 | 0.484 | 0.491 | 0.498 | 0.506 | 0.513 | 0.519 | 0.526 | 0.533 | 0.541 | 0.548 | 0.556 | 0.564 | 0.571 | 0.578 | 0.585 | 0.592 | 0.598 | 0.605 | 0.611 | 0.619 | 0.627 | 0.636 | 0.645 | 0.654 | 0.662 | 0.671 | 0.679 | 0.688 | 0.696 | 0.703 | 0.709 |
| Punjab, Rural            | 0.286 | 0.293 | 0.3   | 0.307 | 0.314 | 0.322 | 0.33  | 0.338 | 0.346 | 0.355 | 0.364 | 0.373 | 0.381 | 0.39  | 0.399 | 0.408 | 0.418 | 0.427 | 0.437 | 0.447 | 0.457 | 0.466 | 0.474 | 0.483 | 0.492 | 0.502 | 0.513 | 0.524 | 0.535 | 0.546 | 0.556 | 0.566 | 0.577 | 0.587 | 0.596 | 0.604 | 0.611 |
| Rajasthan, Urban         | 0.374 | 0.379 | 0.384 | 0.39  | 0.396 | 0.402 | 0.407 | 0.412 | 0.419 | 0.425 | 0.433 | 0.44  | 0.446 | 0.452 | 0.459 | 0.465 | 0.473 | 0.481 | 0.489 | 0.499 | 0.507 | 0.516 | 0.523 | 0.531 | 0.539 | 0.546 | 0.554 | 0.561 | 0.569 | 0.578 | 0.586 | 0.594 | 0.602 | 0.61  | 0.618 | 0.626 | 0.632 |
| Rajasthan, Rural         | 0.218 | 0.222 | 0.226 | 0.232 | 0.236 | 0.241 | 0.246 | 0.251 | 0.258 | 0.265 | 0.273 | 0.28  | 0.286 | 0.292 | 0.299 | 0.305 | 0.312 | 0.318 | 0.324 | 0.331 | 0.337 | 0.345 | 0.352 | 0.36  | 0.368 | 0.376 | 0.385 | 0.395 | 0.404 | 0.412 | 0.423 | 0.434 | 0.445 | 0.456 | 0.467 | 0.478 | 0.487 |
| Sikkim, Urban            | 0.371 | 0.377 | 0.386 | 0.394 | 0.404 | 0.414 | 0.426 | 0.437 | 0.448 | 0.459 | 0.469 | 0.477 | 0.483 | 0.491 | 0.498 | 0.504 | 0.511 | 0.518 | 0.525 | 0.533 | 0.542 | 0.551 | 0.56  | 0.57  | 0.579 | 0.588 | 0.595 | 0.601 | 0.605 | 0.618 | 0.628 | 0.639 | 0.649 | 0.66  | 0.672 | 0.685 | 0.695 |
| Sikkim, Rural            | 0.257 | 0.261 | 0.266 | 0.271 | 0.276 | 0.283 | 0.29  | 0.297 | 0.305 | 0.313 | 0.321 | 0.329 | 0.335 | 0.343 | 0.352 | 0.36  | 0.37  | 0.38  | 0.39  | 0.4   | 0.411 | 0.422 | 0.434 | 0.445 | 0.457 | 0.469 | 0.479 | 0.489 | 0.496 | 0.513 | 0.527 | 0.545 | 0.565 | 0.584 | 0.598 | 0.61  |       |
| Tamil Nadu, Urban        | 0.391 | 0.398 | 0.403 | 0.408 | 0.413 | 0.419 | 0.425 | 0.432 | 0.439 | 0.446 | 0.453 | 0.459 | 0.467 | 0.476 | 0.486 | 0.495 | 0.505 | 0.515 | 0.526 | 0.537 | 0.547 | 0.557 | 0.565 | 0.573 | 0.581 | 0.59  | 0.599 | 0.609 | 0.617 | 0.627 | 0.636 | 0.646 | 0.656 | 0.667 | 0.678 | 0.686 | 0.693 |
| Tamil Nadu, Rural        | 0.264 | 0.27  | 0.274 | 0.279 | 0.285 | 0.292 | 0.299 | 0.307 | 0.315 | 0.324 | 0.333 | 0.341 | 0.35  | 0.359 | 0.369 | 0.379 | 0.389 | 0.399 | 0.411 | 0.422 | 0.433 | 0.443 | 0.453 | 0.462 | 0.472 | 0.483 | 0.494 | 0.506 | 0.516 | 0.528 | 0.539 | 0.551 | 0.562 | 0.574 | 0.586 | 0.595 | 0.603 |
| Telangana, Urban         | 0.37  | 0.376 | 0.382 | 0.389 | 0.396 | 0.402 | 0.409 | 0.416 | 0.424 | 0.432 | 0.44  | 0.449 | 0.457 | 0.4   |       |       |       |       |       |       |       |       |       |       |       |       |       |       |       |       |       |       |       |       |       |       |       |

Appendix Table 14: Socio-Demographic Index values for all estimated GBD 2016 locations, 1980–2016

| Location      | 1980  | 1981  | 1982  | 1983  | 1984  | 1985  | 1986  | 1987  | 1988  | 1989  | 1990  | 1991  | 1992  | 1993  | 1994  | 1995  | 1996  | 1997  | 1998  | 1999  | 2000  | 2001  | 2002  | 2003  | 2004  | 2005  | 2006  | 2007  | 2008  | 2009  | 2010  | 2011  | 2012  | 2013  | 2014  | 2015  | 2016  |
|---------------|-------|-------|-------|-------|-------|-------|-------|-------|-------|-------|-------|-------|-------|-------|-------|-------|-------|-------|-------|-------|-------|-------|-------|-------|-------|-------|-------|-------|-------|-------|-------|-------|-------|-------|-------|-------|-------|
| Kenya         | 0.22  | 0.232 | 0.245 | 0.257 | 0.269 | 0.28  | 0.291 | 0.302 | 0.313 | 0.323 | 0.335 | 0.346 | 0.357 | 0.367 | 0.376 | 0.384 | 0.393 | 0.4   | 0.405 | 0.41  | 0.415 | 0.42  | 0.425 | 0.429 | 0.434 | 0.44  | 0.446 | 0.452 | 0.459 | 0.465 | 0.473 | 0.48  | 0.489 | 0.498 | 0.506 | 0.514 | 0.52  |
| Madagascar    | 0.195 | 0.201 | 0.207 | 0.213 | 0.219 | 0.226 | 0.232 | 0.238 | 0.244 | 0.249 | 0.255 | 0.26  | 0.264 | 0.267 | 0.269 | 0.272 | 0.275 | 0.278 | 0.282 | 0.286 | 0.289 | 0.294 | 0.297 | 0.302 | 0.306 | 0.311 | 0.315 | 0.319 | 0.323 | 0.327 | 0.331 | 0.338 | 0.344 | 0.35  | 0.355 | 0.361 | 0.365 |
| Malawi        | 0.143 | 0.149 | 0.155 | 0.161 | 0.167 | 0.175 | 0.182 | 0.188 | 0.194 | 0.199 | 0.205 | 0.21  | 0.215 | 0.219 | 0.223 | 0.227 | 0.232 | 0.238 | 0.243 | 0.249 | 0.254 | 0.258 | 0.263 | 0.268 | 0.273 | 0.279 | 0.284 | 0.29  | 0.296 | 0.302 | 0.308 | 0.314 | 0.32  | 0.326 | 0.334 | 0.342 | 0.348 |
| Mozambique    | 0.131 | 0.133 | 0.135 | 0.136 | 0.137 | 0.138 | 0.138 | 0.139 | 0.14  | 0.142 | 0.145 | 0.149 | 0.151 | 0.153 | 0.157 | 0.158 | 0.165 | 0.172 | 0.18  | 0.186 | 0.193 | 0.2   | 0.207 | 0.214 | 0.22  | 0.226 | 0.231 | 0.236 | 0.242 | 0.247 | 0.253 | 0.26  | 0.268 | 0.277 | 0.287 | 0.297 | 0.306 |
| Rwanda        | 0.065 | 0.067 | 0.068 | 0.069 | 0.07  | 0.071 | 0.089 | 0.12  | 0.144 | 0.164 | 0.181 | 0.197 | 0.208 | 0.217 | 0.22  | 0.223 | 0.226 | 0.23  | 0.234 | 0.237 | 0.24  | 0.244 | 0.25  | 0.256 | 0.263 | 0.272 | 0.282 | 0.293 | 0.305 | 0.318 | 0.33  | 0.342 | 0.354 | 0.365 | 0.374 | 0.383 | 0.39  |
| Somalia       | 0.161 | 0.162 | 0.164 | 0.166 | 0.168 | 0.171 | 0.173 | 0.176 | 0.18  | 0.183 | 0.187 | 0.19  | 0.192 | 0.194 | 0.195 | 0.196 | 0.197 | 0.198 | 0.199 | 0.2   | 0.201 | 0.203 | 0.205 | 0.208 | 0.212 | 0.216 | 0.22  | 0.225 | 0.23  | 0.235 | 0.24  | 0.245 | 0.251 | 0.256 | 0.26  | 0.265 | 0.268 |
| Tanzania      | 0.176 | 0.183 | 0.19  | 0.197 | 0.205 | 0.213 | 0.22  | 0.226 | 0.233 | 0.239 | 0.245 | 0.251 | 0.256 | 0.259 | 0.263 | 0.271 | 0.279 | 0.288 | 0.295 | 0.302 | 0.308 | 0.314 | 0.32  | 0.326 | 0.332 | 0.339 | 0.345 | 0.352 | 0.359 | 0.367 | 0.375 | 0.384 | 0.392 | 0.402 | 0.411 | 0.421 | 0.428 |
| Uganda        | 0.101 | 0.11  | 0.117 | 0.125 | 0.134 | 0.142 | 0.149 | 0.156 | 0.163 | 0.17  | 0.177 | 0.184 | 0.19  | 0.196 | 0.203 | 0.209 | 0.215 | 0.22  | 0.226 | 0.232 | 0.238 | 0.244 | 0.251 | 0.257 | 0.265 | 0.272 | 0.28  | 0.289 | 0.298 | 0.308 | 0.317 | 0.328 | 0.338 | 0.348 | 0.359 | 0.37  | 0.377 |
| Zambia        | 0.193 | 0.205 | 0.216 | 0.228 | 0.239 | 0.251 | 0.261 | 0.271 | 0.281 | 0.291 | 0.299 | 0.307 | 0.315 | 0.321 | 0.326 | 0.331 | 0.336 | 0.34  | 0.343 | 0.346 | 0.35  | 0.354 | 0.357 | 0.362 | 0.366 | 0.371 | 0.377 | 0.385 | 0.393 | 0.401 | 0.41  | 0.419 | 0.428 | 0.437 | 0.446 | 0.454 | 0.46  |
| South Sudan   | 0.053 | 0.054 | 0.054 | 0.055 | 0.056 | 0.056 | 0.057 | 0.062 | 0.07  | 0.077 | 0.082 | 0.088 | 0.092 | 0.095 | 0.098 | 0.102 | 0.105 | 0.108 | 0.111 | 0.114 | 0.117 | 0.12  | 0.123 | 0.127 | 0.13  | 0.134 | 0.138 | 0.143 | 0.148 | 0.152 | 0.158 | 0.164 | 0.17  | 0.176 | 0.182 | 0.188 | 0.192 |
| Central       | 0.292 | 0.305 | 0.318 | 0.33  | 0.343 | 0.356 | 0.368 | 0.379 | 0.39  | 0.401 | 0.413 | 0.425 | 0.435 | 0.444 | 0.453 | 0.462 | 0.47  | 0.478 | 0.482 | 0.487 | 0.492 | 0.497 | 0.501 | 0.505 | 0.51  | 0.515 | 0.521 | 0.527 | 0.533 | 0.54  | 0.546 | 0.553 | 0.56  | 0.566 | 0.573 | 0.58  | 0.585 |
| Coast         | 0.146 | 0.16  | 0.172 | 0.185 | 0.196 | 0.205 | 0.214 | 0.222 | 0.231 | 0.241 | 0.252 | 0.264 | 0.275 | 0.286 | 0.296 | 0.305 | 0.313 | 0.321 | 0.327 | 0.332 | 0.337 | 0.343 | 0.348 | 0.354 | 0.361 | 0.368 | 0.376 | 0.385 | 0.394 | 0.403 | 0.413 | 0.423 | 0.434 | 0.444 | 0.455 | 0.465 | 0.473 |
| Eastern       | 0.196 | 0.209 | 0.221 | 0.233 | 0.245 | 0.256 | 0.266 | 0.277 | 0.287 | 0.298 | 0.31  | 0.322 | 0.333 | 0.344 | 0.353 | 0.362 | 0.371 | 0.379 | 0.385 | 0.391 | 0.396 | 0.401 | 0.407 | 0.412 | 0.418 | 0.424 | 0.431 | 0.438 | 0.445 | 0.452 | 0.46  | 0.467 | 0.475 | 0.483 | 0.49  | 0.498 | 0.503 |
| Nairobi       | 0.42  | 0.431 | 0.442 | 0.453 | 0.464 | 0.475 | 0.486 | 0.496 | 0.506 | 0.516 | 0.526 | 0.536 | 0.545 | 0.553 | 0.56  | 0.567 | 0.574 | 0.58  | 0.585 | 0.589 | 0.593 | 0.598 | 0.602 | 0.607 | 0.611 | 0.617 | 0.623 | 0.63  | 0.637 | 0.644 | 0.652 | 0.66  | 0.669 | 0.677 | 0.685 | 0.694 | 0.701 |
| North Eastern | 0.049 | 0.05  | 0.051 | 0.052 | 0.053 | 0.053 | 0.054 | 0.055 | 0.056 | 0.057 | 0.058 | 0.059 | 0.061 | 0.062 | 0.067 | 0.075 | 0.08  | 0.081 | 0.076 | 0.068 | 0.069 | 0.07  | 0.071 | 0.072 | 0.073 | 0.074 | 0.075 | 0.077 | 0.078 | 0.079 | 0.08  | 0.081 | 0.083 | 0.084 | 0.092 | 0.112 | 0.124 |
| Nyanza        | 0.204 | 0.216 | 0.229 | 0.241 | 0.253 | 0.264 | 0.274 | 0.285 | 0.295 | 0.306 | 0.318 | 0.331 | 0.343 | 0.353 | 0.364 | 0.373 | 0.383 | 0.391 | 0.398 | 0.404 | 0.411 | 0.417 | 0.423 | 0.429 | 0.436 | 0.443 | 0.45  | 0.458 | 0.466 | 0.475 | 0.483 | 0.491 | 0.5   | 0.508 | 0.516 | 0.524 | 0.53  |
| Rift Valley   | 0.173 | 0.188 | 0.202 | 0.216 | 0.228 | 0.239 | 0.249 | 0.259 | 0.269 | 0.28  | 0.292 | 0.305 | 0.316 | 0.327 | 0.337 | 0.347 | 0.356 | 0.363 | 0.37  | 0.375 | 0.381 | 0.386 | 0.392 | 0.397 | 0.403 | 0.41  | 0.417 | 0.424 | 0.432 | 0.44  | 0.448 | 0.457 | 0.465 | 0.474 | 0.482 | 0.491 | 0.497 |
| Western       | 0.228 | 0.24  | 0.251 | 0.263 | 0.274 | 0.284 | 0.294 | 0.303 | 0.312 | 0.322 | 0.332 | 0.343 | 0.353 | 0.362 | 0.37  | 0.378 | 0.385 | 0.391 | 0.396 | 0.4   | 0.404 | 0.408 | 0.412 | 0.416 | 0.421 | 0.426 | 0.431 | 0.437 | 0.443 | 0.45  | 0.456 | 0.463 | 0.47  | 0.477 | 0.484 | 0.491 | 0.496 |
| Kiambu        | 0.313 | 0.327 | 0.341 | 0.355 | 0.368 | 0.382 | 0.394 | 0.406 | 0.41  | 0.452 | 0.462 | 0.47  | 0.478 | 0.486 | 0.493 | 0.498 | 0.503 | 0.507 | 0.511 | 0.515 | 0.518 | 0.519 | 0.523 | 0.527 | 0.531 | 0.536 | 0.541 | 0.547 | 0.553 | 0.559 | 0.566 | 0.574 | 0.581 | 0.588 | 0.596 | 0.601 |       |
| Kirinyaga     | 0.28  | 0.292 | 0.303 | 0.314 | 0.326 | 0.337 | 0.348 | 0.358 | 0.369 | 0.379 | 0.389 | 0.399 | 0.408 | 0.417 | 0.427 | 0.437 | 0.446 | 0.454 | 0.461 | 0.467 | 0.473 | 0.479 | 0.484 | 0.49  | 0.495 | 0.501 | 0.508 | 0.514 | 0.521 | 0.527 | 0.533 | 0.54  | 0.546 | 0.552 | 0.558 | 0.564 | 0.569 |
| Murang'a      | 0.278 | 0.29  | 0.303 | 0.315 | 0.328 | 0.34  | 0.352 | 0.363 | 0.374 | 0.384 | 0.395 | 0.406 | 0.415 | 0.424 | 0.432 | 0.44  | 0.447 | 0.454 | 0.461 | 0.466 | 0.472 | 0.477 | 0.482 | 0.487 | 0.492 | 0.497 | 0.503 | 0.509 | 0.515 | 0.52  | 0.526 | 0.531 | 0.537 | 0.542 | 0.547 | 0.552 | 0.556 |
| Nyandarua     | 0.263 | 0.275 | 0.287 | 0.3   | 0.312 | 0.325 | 0.337 | 0.348 | 0.36  | 0.371 | 0.383 | 0.395 | 0.405 | 0.415 | 0.423 | 0.431 | 0.439 | 0.446 | 0.452 | 0.457 | 0.462 | 0.466 | 0.47  | 0.474 | 0.479 | 0.484 | 0.489 | 0.496 | 0.503 | 0.51  | 0.518 | 0.526 | 0.534 | 0.542 | 0.55  | 0.558 | 0.564 |
| Nyeri         | 0.292 | 0.305 | 0.318 | 0.332 | 0.345 | 0.358 | 0.37  | 0.382 | 0.394 | 0.407 | 0.419 | 0.432 | 0.443 | 0.453 | 0.462 | 0.47  | 0.477 | 0.483 | 0.488 | 0.492 | 0.496 | 0.5   | 0.503 | 0.507 | 0.512 | 0.517 | 0.524 | 0.531 | 0.538 | 0.546 | 0.553 | 0.56  | 0.566 | 0.572 | 0.577 | 0.583 | 0.587 |
| Kilifi        | 0.085 | 0.086 | 0.087 | 0.088 | 0.089 | 0.09  | 0.098 | 0.111 | 0.122 | 0.134 | 0.15  | 0.166 | 0.182 | 0.197 | 0.212 | 0.226 | 0.238 | 0.249 | 0.258 | 0.266 | 0.273 | 0.28  | 0.286 | 0.291 | 0.295 | 0.301 | 0.306 | 0.313 | 0.321 | 0.33  | 0.341 | 0.352 | 0.364 | 0.375 | 0.387 | 0.398 | 0.406 |
| Kwale         | 0.13  | 0.141 | 0.151 | 0.161 | 0.17  | 0.177 | 0.185 | 0.192 | 0.2   | 0.209 | 0.221 | 0.234 | 0.246 | 0.255 | 0.261 | 0.266 | 0.271 | 0.275 | 0.278 | 0.28  | 0.281 | 0.283 | 0.285 | 0.289 | 0.294 | 0.3   | 0.306 | 0.314 | 0.324 | 0.334 | 0.346 | 0.357 | 0.369 | 0.381 | 0.393 | 0.404 | 0.412 |
| Lamu          | 0.168 | 0.181 | 0.193 | 0.205 | 0.215 | 0.224 | 0.233 | 0.241 | 0.249 | 0.255 | 0.262 | 0.269 | 0.276 | 0.283 | 0.292 | 0.3   | 0.309 | 0.317 | 0.325 | 0.332 | 0.338 | 0.344 | 0.349 | 0.355 | 0.36  | 0.365 | 0.371 | 0.376 | 0.381 | 0.388 | 0.397 | 0.406 | 0.415 | 0.425 | 0.434 | 0.444 | 0.45  |
| Mombasa       | 0.246 | 0.259 | 0.271 | 0.283 | 0.294 | 0.305 | 0.316 | 0.326 | 0.337 | 0.347 | 0.36  | 0.372 | 0.384 | 0.394 | 0.404 | 0.413 | 0.421 | 0.429 | 0.435 | 0.44  | 0.444 | 0.448 | 0.452 | 0.457 | 0.463 | 0.47  | 0.477 | 0.484 | 0.491 | 0.499 | 0.508 | 0.518 | 0.529 | 0.539 | 0.549 | 0.56  | 0.568 |
| TaitaTaveta   | 0.156 | 0.172 | 0.186 | 0.2   | 0.212 | 0.223 | 0.233 | 0.242 | 0.252 | 0.263 | 0.276 | 0.29  | 0.303 | 0.315 | 0.327 | 0.339 | 0.349 | 0.359 | 0.367 | 0.374 | 0.38  | 0.386 | 0.392 | 0.399 | 0.408 | 0.417 | 0.426 | 0.435 | 0.444 | 0.453 | 0.464 | 0.474 | 0.484 | 0.494 | 0.504 | 0.513 | 0.52  |
| TanaRiver     | 0.064 | 0.065 | 0.066 | 0.077 | 0.084 | 0.088 | 0.09  | 0.092 | 0.097 | 0.107 | 0.12  | 0.132 | 0.145 | 0.157 | 0.167 | 0.176 | 0.183 | 0.188 | 0.189 | 0.187 | 0.185 | 0.182 | 0.179 | 0.175 | 0.172 | 0.169 | 0.168 | 0.171 | 0.178 | 0.191 | 0.204 | 0.219 | 0.234 | 0.248 | 0.261 | 0.271 |       |
| Embu          | 0.237 | 0.25  | 0.262 | 0.274 | 0.287 | 0.298 | 0.31  | 0.32  | 0.331 | 0.342 | 0.353 | 0.365 | 0.375 | 0.386 | 0.396 | 0.407 | 0.417 | 0.426 | 0.434 | 0.441 | 0.449 | 0.456 | 0.463 | 0.469 | 0.474 | 0.48  | 0.486 | 0.493 | 0.499 | 0.506 | 0.514 | 0.521 | 0.529 | 0.536 | 0.543 | 0.55  | 0.555 |
| Isiolo        | 0.205 | 0.212 | 0.219 | 0.226 | 0.233 | 0.24  | 0.246 | 0.252 | 0.258 | 0.264 | 0.27  | 0.277 | 0.284 | 0.289 | 0.295 | 0.3   | 0.306 | 0.311 | 0.315 | 0.32  | 0.325 | 0.33  | 0.334 | 0.336 | 0.336 | 0.335 | 0.334 | 0.334 | 0.336 | 0.339 | 0.343 | 0.348 | 0.354 | 0.36  | 0.366 | 0.372 | 0.377 |
| Kitui         | 0.145 | 0.158 | 0.171 | 0.183 | 0.195 | 0.207 | 0.217 | 0.227 | 0.237 | 0.246 | 0.255 | 0.265 | 0.274 | 0.283 | 0.293 | 0.302 | 0.311 | 0.319 | 0.327 | 0.333 | 0.339 | 0.345 | 0.351 |       |       |       |       |       |       |       |       |       |       |       |       |       |       |

Appendix Table 14: Socio-Demographic Index values for all estimated GBD 2016 locations, 1980–2016

| Location                    | 1980  | 1981  | 1982  | 1983  | 1984  | 1985  | 1986  | 1987  | 1988  | 1989  | 1990  | 1991  | 1992  | 1993  | 1994  | 1995  | 1996  | 1997  | 1998  | 1999  | 2000  | 2001  | 2002  | 2003  | 2004  | 2005  | 2006  | 2007  | 2008  | 2009  | 2010  | 2011  | 2012  | 2013  | 2014  | 2015  | 2016  |       |
|-----------------------------|-------|-------|-------|-------|-------|-------|-------|-------|-------|-------|-------|-------|-------|-------|-------|-------|-------|-------|-------|-------|-------|-------|-------|-------|-------|-------|-------|-------|-------|-------|-------|-------|-------|-------|-------|-------|-------|-------|
| TransNzoia                  | 0.103 | 0.137 | 0.161 | 0.18  | 0.197 | 0.21  | 0.222 | 0.234 | 0.246 | 0.26  | 0.278 | 0.296 | 0.313 | 0.328 | 0.341 | 0.353 | 0.364 | 0.374 | 0.382 | 0.39  | 0.398 | 0.405 | 0.412 | 0.418 | 0.422 | 0.427 | 0.432 | 0.438 | 0.445 | 0.453 | 0.462 | 0.471 | 0.48  | 0.489 | 0.498 | 0.506 | 0.513 |       |
| Turkana                     | 0.185 | 0.19  | 0.195 | 0.2   | 0.205 | 0.209 | 0.213 | 0.217 | 0.22  | 0.223 | 0.227 | 0.231 | 0.235 | 0.238 | 0.241 | 0.244 | 0.247 | 0.249 | 0.251 | 0.25  | 0.249 | 0.248 | 0.248 | 0.248 | 0.249 | 0.251 | 0.253 | 0.256 | 0.26  | 0.265 | 0.268 | 0.271 | 0.273 | 0.276 | 0.279 | 0.283 | 0.287 | 0.289 |
| UasinGishu                  | 0.183 | 0.202 | 0.22  | 0.237 | 0.252 | 0.266 | 0.279 | 0.291 | 0.303 | 0.316 | 0.329 | 0.342 | 0.355 | 0.366 | 0.376 | 0.386 | 0.395 | 0.404 | 0.413 | 0.422 | 0.432 | 0.443 | 0.453 | 0.462 | 0.47  | 0.478 | 0.486 | 0.495 | 0.504 | 0.513 | 0.522 | 0.53  | 0.539 | 0.548 | 0.556 | 0.564 | 0.57  |       |
| WestPokot                   | 0.153 | 0.16  | 0.168 | 0.176 | 0.183 | 0.19  | 0.196 | 0.203 | 0.211 | 0.219 | 0.23  | 0.24  | 0.25  | 0.258 | 0.264 | 0.27  | 0.275 | 0.279 | 0.28  | 0.281 | 0.283 | 0.284 | 0.286 | 0.289 | 0.292 | 0.296 | 0.301 | 0.308 | 0.314 | 0.321 | 0.328 | 0.335 | 0.343 | 0.351 | 0.359 | 0.367 | 0.373 |       |
| Bungoma                     | 0.199 | 0.214 | 0.228 | 0.242 | 0.254 | 0.266 | 0.277 | 0.287 | 0.296 | 0.305 | 0.316 | 0.327 | 0.336 | 0.345 | 0.354 | 0.362 | 0.37  | 0.378 | 0.385 | 0.392 | 0.399 | 0.406 | 0.413 | 0.42  | 0.426 | 0.432 | 0.438 | 0.444 | 0.45  | 0.456 | 0.462 | 0.466 | 0.477 | 0.484 | 0.492 | 0.499 | 0.505 |       |
| Busia                       | 0.235 | 0.246 | 0.256 | 0.266 | 0.276 | 0.285 | 0.294 | 0.303 | 0.312 | 0.321 | 0.331 | 0.341 | 0.35  | 0.359 | 0.365 | 0.371 | 0.377 | 0.382 | 0.385 | 0.387 | 0.39  | 0.393 | 0.396 | 0.399 | 0.402 | 0.406 | 0.41  | 0.415 | 0.421 | 0.427 | 0.433 | 0.44  | 0.447 | 0.454 | 0.461 | 0.468 | 0.473 |       |
| Kakamega                    | 0.23  | 0.241 | 0.252 | 0.263 | 0.273 | 0.283 | 0.292 | 0.302 | 0.311 | 0.321 | 0.332 | 0.344 | 0.355 | 0.365 | 0.374 | 0.383 | 0.39  | 0.397 | 0.402 | 0.405 | 0.408 | 0.411 | 0.414 | 0.417 | 0.421 | 0.426 | 0.431 | 0.438 | 0.444 | 0.45  | 0.457 | 0.463 | 0.47  | 0.477 | 0.484 | 0.491 | 0.496 |       |
| Vihiga                      | 0.258 | 0.27  | 0.281 | 0.293 | 0.304 | 0.315 | 0.325 | 0.334 | 0.344 | 0.352 | 0.361 | 0.37  | 0.378 | 0.385 | 0.391 | 0.397 | 0.401 | 0.405 | 0.408 | 0.409 | 0.41  | 0.412 | 0.415 | 0.418 | 0.422 | 0.428 | 0.436 | 0.446 | 0.456 | 0.467 | 0.476 | 0.485 | 0.493 | 0.5   | 0.507 | 0.513 | 0.517 |       |
| Southern Sub-Saharan Africa | 0.505 | 0.511 | 0.516 | 0.521 | 0.527 | 0.531 | 0.536 | 0.541 | 0.546 | 0.552 | 0.558 | 0.564 | 0.57  | 0.577 | 0.583 | 0.589 | 0.595 | 0.601 | 0.606 | 0.611 | 0.615 | 0.62  | 0.625 | 0.63  | 0.635 | 0.64  | 0.646 | 0.651 | 0.656 | 0.661 | 0.666 | 0.672 | 0.677 | 0.681 | 0.685 | 0.689 | 0.691 |       |
| Botswana                    | 0.404 | 0.414 | 0.423 | 0.432 | 0.441 | 0.451 | 0.461 | 0.471 | 0.484 | 0.497 | 0.508 | 0.518 | 0.527 | 0.536 | 0.544 | 0.552 | 0.56  | 0.569 | 0.578 | 0.587 | 0.595 | 0.602 | 0.609 | 0.616 | 0.623 | 0.631 | 0.638 | 0.645 | 0.65  | 0.656 | 0.662 | 0.669 | 0.675 | 0.682 | 0.689 | 0.695 | 0.701 |       |
| Lesotho                     | 0.323 | 0.328 | 0.333 | 0.337 | 0.341 | 0.345 | 0.349 | 0.353 | 0.358 | 0.364 | 0.37  | 0.376 | 0.383 | 0.39  | 0.397 | 0.403 | 0.41  | 0.417 | 0.423 | 0.429 | 0.435 | 0.442 | 0.448 | 0.455 | 0.462 | 0.469 | 0.475 | 0.482 | 0.489 | 0.496 | 0.504 | 0.513 | 0.521 | 0.529 | 0.538 | 0.545 | 0.552 |       |
| Namibia                     | 0.374 | 0.38  | 0.385 | 0.39  | 0.395 | 0.399 | 0.404 | 0.41  | 0.416 | 0.422 | 0.427 | 0.433 | 0.441 | 0.45  | 0.459 | 0.469 | 0.478 | 0.488 | 0.497 | 0.505 | 0.514 | 0.522 | 0.531 | 0.539 | 0.547 | 0.555 | 0.563 | 0.569 | 0.575 | 0.58  | 0.586 | 0.591 | 0.597 | 0.604 | 0.611 | 0.618 | 0.624 |       |
| South Africa                | 0.542 | 0.548 | 0.554 | 0.559 | 0.564 | 0.569 | 0.574 | 0.579 | 0.584 | 0.59  | 0.596 | 0.601 | 0.606 | 0.613 | 0.619 | 0.624 | 0.63  | 0.636 | 0.64  | 0.645 | 0.649 | 0.653 | 0.658 | 0.663 | 0.669 | 0.675 | 0.682 | 0.688 | 0.695 | 0.701 | 0.707 | 0.714 | 0.719 | 0.724 | 0.727 | 0.73  | 0.734 |       |
| Swaziland                   | 0.384 | 0.391 | 0.398 | 0.404 | 0.41  | 0.415 | 0.421 | 0.429 | 0.437 | 0.446 | 0.454 | 0.462 | 0.47  | 0.477 | 0.484 | 0.491 | 0.498 | 0.504 | 0.509 | 0.514 | 0.518 | 0.522 | 0.525 | 0.528 | 0.531 | 0.534 | 0.537 | 0.538 | 0.538 | 0.539 | 0.544 | 0.553 | 0.562 | 0.571 | 0.578 | 0.584 | 0.589 |       |
| Zimbabwe                    | 0.357 | 0.364 | 0.37  | 0.377 | 0.384 | 0.39  | 0.397 | 0.403 | 0.412 | 0.422 | 0.432 | 0.443 | 0.452 | 0.461 | 0.47  | 0.477 | 0.486 | 0.493 | 0.498 | 0.502 | 0.505 | 0.507 | 0.508 | 0.506 | 0.503 | 0.498 | 0.492 | 0.485 | 0.477 | 0.472 | 0.469 | 0.47  | 0.474 | 0.479 | 0.485 | 0.491 | 0.497 |       |
| Eastern Cape                | 0.495 | 0.501 | 0.506 | 0.511 | 0.516 | 0.521 | 0.524 | 0.528 | 0.533 | 0.538 | 0.543 | 0.547 | 0.551 | 0.557 | 0.562 | 0.567 | 0.573 | 0.578 | 0.583 | 0.587 | 0.591 | 0.596 | 0.601 | 0.606 | 0.612 | 0.618 | 0.626 | 0.633 | 0.64  | 0.647 | 0.653 | 0.66  | 0.665 | 0.67  | 0.673 | 0.676 | 0.679 |       |
| Free State                  | 0.546 | 0.551 | 0.556 | 0.56  | 0.564 | 0.568 | 0.572 | 0.576 | 0.581 | 0.586 | 0.591 | 0.597 | 0.602 | 0.609 | 0.617 | 0.624 | 0.631 | 0.637 | 0.641 | 0.645 | 0.649 | 0.652 | 0.656 | 0.661 | 0.666 | 0.672 | 0.678 | 0.684 | 0.69  | 0.696 | 0.702 | 0.708 | 0.714 | 0.718 | 0.721 | 0.724 | 0.727 |       |
| Gauteng                     | 0.656 | 0.66  | 0.664 | 0.667 | 0.671 | 0.674 | 0.677 | 0.681 | 0.684 | 0.688 | 0.692 | 0.695 | 0.698 | 0.702 | 0.705 | 0.707 | 0.709 | 0.712 | 0.715 | 0.718 | 0.721 | 0.724 | 0.728 | 0.731 | 0.735 | 0.74  | 0.744 | 0.749 | 0.754 | 0.759 | 0.763 | 0.768 | 0.773 | 0.775 | 0.778 | 0.78  | 0.782 |       |
| KwaZulu-Natal               | 0.521 | 0.527 | 0.532 | 0.537 | 0.542 | 0.546 | 0.551 | 0.555 | 0.56  | 0.566 | 0.571 | 0.576 | 0.581 | 0.588 | 0.594 | 0.599 | 0.605 | 0.61  | 0.615 | 0.619 | 0.624 | 0.629 | 0.634 | 0.639 | 0.645 | 0.651 | 0.658 | 0.665 | 0.672 | 0.679 | 0.685 | 0.692 | 0.698 | 0.702 | 0.706 | 0.71  | 0.713 |       |
| Limpopo                     | 0.447 | 0.454 | 0.461 | 0.467 | 0.473 | 0.479 | 0.484 | 0.49  | 0.497 | 0.504 | 0.511 | 0.518 | 0.524 | 0.532 | 0.54  | 0.547 | 0.554 | 0.562 | 0.568 | 0.572 | 0.577 | 0.582 | 0.588 | 0.594 | 0.602 | 0.61  | 0.618 | 0.627 | 0.636 | 0.643 | 0.651 | 0.659 | 0.665 | 0.671 | 0.675 | 0.679 | 0.682 |       |
| Mpumalanga                  | 0.495 | 0.502 | 0.508 | 0.514 | 0.52  | 0.525 | 0.531 | 0.537 | 0.543 | 0.55  | 0.557 | 0.563 | 0.57  | 0.577 | 0.584 | 0.589 | 0.595 | 0.601 | 0.606 | 0.61  | 0.615 | 0.62  | 0.625 | 0.631 | 0.637 | 0.644 | 0.652 | 0.659 | 0.667 | 0.674 | 0.681 | 0.688 | 0.695 | 0.7   | 0.703 | 0.707 | 0.71  |       |
| North-West                  | 0.523 | 0.529 | 0.534 | 0.539 | 0.545 | 0.55  | 0.555 | 0.56  | 0.565 | 0.571 | 0.576 | 0.58  | 0.585 | 0.59  | 0.594 | 0.597 | 0.6   | 0.604 | 0.608 | 0.613 | 0.618 | 0.623 | 0.628 | 0.633 | 0.639 | 0.645 | 0.651 | 0.658 | 0.664 | 0.671 | 0.677 | 0.683 | 0.689 | 0.693 | 0.696 | 0.699 | 0.702 |       |
| Northern Cape               | 0.545 | 0.55  | 0.555 | 0.559 | 0.564 | 0.568 | 0.572 | 0.576 | 0.58  | 0.585 | 0.59  | 0.594 | 0.598 | 0.603 | 0.607 | 0.61  | 0.614 | 0.619 | 0.623 | 0.626 | 0.63  | 0.633 | 0.637 | 0.641 | 0.646 | 0.652 | 0.658 | 0.664 | 0.67  | 0.675 | 0.681 | 0.688 | 0.693 | 0.697 | 0.7   | 0.704 | 0.707 |       |
| Western Cape                | 0.653 | 0.657 | 0.66  | 0.662 | 0.665 | 0.668 | 0.67  | 0.672 | 0.675 | 0.678 | 0.681 | 0.684 | 0.687 | 0.691 | 0.695 | 0.698 | 0.703 | 0.708 | 0.711 | 0.713 | 0.715 | 0.717 | 0.72  | 0.722 | 0.725 | 0.728 | 0.732 | 0.736 | 0.74  | 0.744 | 0.748 | 0.752 | 0.756 | 0.758 | 0.76  | 0.762 | 0.764 |       |
| Western Sub-Saharan Africa  | 0.254 | 0.259 | 0.263 | 0.268 | 0.272 | 0.276 | 0.279 | 0.281 | 0.282 | 0.285 | 0.287 | 0.29  | 0.293 | 0.297 | 0.301 | 0.305 | 0.31  | 0.314 | 0.318 | 0.322 | 0.326 | 0.33  | 0.335 | 0.339 | 0.345 | 0.351 | 0.357 | 0.364 | 0.37  | 0.376 | 0.383 | 0.391 | 0.399 | 0.407 | 0.415 | 0.423 | 0.428 |       |
| Benin                       | 0.171 | 0.175 | 0.178 | 0.182 | 0.187 | 0.192 | 0.197 | 0.202 | 0.207 | 0.212 | 0.217 | 0.222 | 0.227 | 0.233 | 0.237 | 0.242 | 0.247 | 0.252 | 0.257 | 0.262 | 0.267 | 0.273 | 0.278 | 0.283 | 0.288 | 0.293 | 0.298 | 0.304 | 0.31  | 0.315 | 0.32  | 0.326 | 0.33  | 0.335 | 0.34  | 0.346 | 0.351 |       |
| Burkina Faso                | 0.103 | 0.106 | 0.108 | 0.109 | 0.111 | 0.113 | 0.115 | 0.117 | 0.12  | 0.123 | 0.125 | 0.13  | 0.136 | 0.141 | 0.146 | 0.15  | 0.155 | 0.16  | 0.165 | 0.169 | 0.173 | 0.178 | 0.182 | 0.186 | 0.191 | 0.195 | 0.2   | 0.206 | 0.212 | 0.217 | 0.225 | 0.234 | 0.244 | 0.253 | 0.262 | 0.269 | 0.274 |       |
| Cameroon                    | 0.283 | 0.289 | 0.296 | 0.302 | 0.309 | 0.316 | 0.322 | 0.327 | 0.332 | 0.337 | 0.341 | 0.345 | 0.349 | 0.353 | 0.356 | 0.36  | 0.364 | 0.369 | 0.374 | 0.379 | 0.383 | 0.388 | 0.392 | 0.396 | 0.4   | 0.403 | 0.406 | 0.409 | 0.412 | 0.415 | 0.419 | 0.423 | 0.428 | 0.433 | 0.439 | 0.445 | 0.451 |       |
| Cape Verde                  | 0.241 | 0.248 | 0.256 | 0.263 | 0.271 | 0.279 | 0.287 | 0.294 | 0.302 | 0.31  | 0.317 | 0.325 | 0.332 | 0.34  | 0.349 | 0.358 | 0.367 | 0.377 | 0.387 | 0.399 | 0.41  | 0.421 | 0.431 | 0.442 | 0.452 | 0.462 | 0.473 | 0.484 | 0.495 | 0.505 | 0.514 | 0.524 | 0.534 | 0.542 | 0.551 | 0.559 | 0.566 |       |
| Chad                        | 0.158 | 0.159 | 0.159 | 0.161 | 0.163 | 0.166 | 0.169 | 0.172 | 0.175 | 0.179 | 0.183 | 0.187 | 0.191 | 0.194 | 0.197 | 0.2   | 0.203 | 0.206 | 0.209 | 0.212 | 0.214 | 0.217 | 0.219 | 0.222 | 0.228 | 0.235 | 0.241 | 0.247 | 0.252 | 0.257 | 0.262 | 0.268 | 0.274 | 0.28  | 0.285 | 0.29  | 0.295 |       |
| Cote d'Ivoire               | 0.225 | 0.226 | 0.227 | 0.228 | 0.23  | 0.234 | 0.241 | 0.249 | 0.258 | 0.267 | 0.277 | 0.287 | 0.297 | 0.306 | 0.313 | 0.32  | 0.327 | 0.332 | 0.337 | 0.341 | 0.345 | 0.348 | 0.351 | 0.353 | 0.355 | 0.358 | 0.36  | 0.363 | 0.366 | 0.369 | 0.373 | 0.377 | 0.382 | 0.388 | 0.394 | 0.401 | 0.407 |       |
| The Gambia                  | 0.205 | 0.21  | 0.215 | 0.221 | 0.226 | 0.232 | 0.237 | 0.242 | 0.247 | 0.251 | 0.254 | 0.255 | 0.255 | 0.254 | 0.254 | 0.255 | 0.259 |       |       |       |       |       |       |       |       |       |       |       |       |       |       |       |       |       |       |       |       |       |

**Appendix Table 15: GBD 2016 location hierarchy with levels**

| Location                                         | Level |
|--------------------------------------------------|-------|
| Global                                           | 0     |
| Southeast Asia, East Asia, and Oceania           | 1     |
| East Asia                                        | 2     |
| China                                            | 3     |
| Anhui                                            | 4     |
| Beijing                                          | 4     |
| Chongqing                                        | 4     |
| Fujian                                           | 4     |
| Gansu                                            | 4     |
| Guangdong                                        | 4     |
| Guangxi                                          | 4     |
| Guizhou                                          | 4     |
| Hainan                                           | 4     |
| Hebei                                            | 4     |
| Heilongjiang                                     | 4     |
| Henan                                            | 4     |
| Hong Kong Special Administrative Region of China | 4     |
| Hubei                                            | 4     |
| Hunan                                            | 4     |
| Inner Mongolia                                   | 4     |
| Jiangsu                                          | 4     |
| Jiangxi                                          | 4     |
| Jilin                                            | 4     |
| Liaoning                                         | 4     |
| Macao Special Administrative Region of China     | 4     |
| Ningxia                                          | 4     |
| Qinghai                                          | 4     |
| Shaanxi                                          | 4     |
| Shandong                                         | 4     |
| Shanghai                                         | 4     |
| Shanxi                                           | 4     |
| Sichuan                                          | 4     |
| Tianjin                                          | 4     |
| Tibet                                            | 4     |
| Xinjiang                                         | 4     |
| Yunnan                                           | 4     |
| Zhejiang                                         | 4     |
| North Korea                                      | 3     |
| Taiwan (Province of China)                       | 3     |
| Southeast Asia                                   | 2     |
| Cambodia                                         | 3     |
| Indonesia                                        | 3     |
| Aceh                                             | 4     |
| Bali                                             | 4     |
| Bangka Belitung                                  | 4     |
| Banten                                           | 4     |

**Appendix Table 15: GBD 2016 location hierarchy with levels**

| Location                       | Level |
|--------------------------------|-------|
| Bengkulu                       | 4     |
| Gorontalo                      | 4     |
| Jakarta                        | 4     |
| Jambi                          | 4     |
| Central Java                   | 4     |
| West Java                      | 4     |
| East Java                      | 4     |
| West Kalimantan                | 4     |
| South Kalimantan               | 4     |
| Central Kalimantan             | 4     |
| East Kalimantan                | 4     |
| North Kalimantan               | 4     |
| Riau Islands                   | 4     |
| Lampung                        | 4     |
| Maluku                         | 4     |
| North Maluku                   | 4     |
| Nusa Tenggara Barat            | 4     |
| East Nusa Tenggara             | 4     |
| Papua                          | 4     |
| West Papua                     | 4     |
| Riau                           | 4     |
| West Sulawesi                  | 4     |
| South Sumatera                 | 4     |
| Central Sulawesi               | 4     |
| Southeast Sulawesi             | 4     |
| North Sulawesi                 | 4     |
| West Sumatera                  | 4     |
| South Sumatera                 | 4     |
| North Sumatera                 | 4     |
| Yogyakarta                     | 4     |
| Laos                           | 3     |
| Malaysia                       | 3     |
| Maldives                       | 3     |
| Mauritius                      | 3     |
| Myanmar                        | 3     |
| Philippines                    | 3     |
| Sri Lanka                      | 3     |
| Seychelles                     | 3     |
| Thailand                       | 3     |
| Timor-Leste                    | 3     |
| Vietnam                        | 3     |
| Oceania                        | 2     |
| American Samoa                 | 3     |
| Federated States of Micronesia | 3     |
| Fiji                           | 3     |
| Guam                           | 3     |

**Appendix Table 15: GBD 2016 location hierarchy with levels**

| Location                                         | Level |
|--------------------------------------------------|-------|
| Kiribati                                         | 3     |
| Marshall Islands                                 | 3     |
| Northern Mariana Islands                         | 3     |
| Papua New Guinea                                 | 3     |
| Samoa                                            | 3     |
| Solomon Islands                                  | 3     |
| Tonga                                            | 3     |
| Vanuatu                                          | 3     |
| Central Europe, Eastern Europe, and Central Asia | 1     |
| Central Asia                                     | 2     |
| Armenia                                          | 3     |
| Azerbaijan                                       | 3     |
| Georgia                                          | 4     |
| Georgia                                          | 3     |
| Kazakhstan                                       | 3     |
| Kyrgyzstan                                       | 3     |
| Mongolia                                         | 3     |
| Tajikistan                                       | 3     |
| Turkmenistan                                     | 3     |
| Uzbekistan                                       | 3     |
| Central Europe                                   | 2     |
| Albania                                          | 3     |
| Bosnia and Herzegovina                           | 3     |
| Bulgaria                                         | 3     |
| Croatia                                          | 3     |
| Czech Republic                                   | 3     |
| Hungary                                          | 3     |
| Macedonia                                        | 3     |
| Montenegro                                       | 3     |
| Poland                                           | 3     |
| Romania                                          | 3     |
| Serbia                                           | 3     |
| Slovakia                                         | 3     |
| Slovenia                                         | 3     |
| Eastern Europe                                   | 2     |
| Belarus                                          | 3     |
| Estonia                                          | 3     |
| Latvia                                           | 3     |
| Lithuania                                        | 3     |
| Moldova                                          | 3     |
| Russia                                           | 3     |
| Ukraine                                          | 3     |
| High-income                                      | 1     |
| High-income Asia Pacific                         | 2     |
| Brunei                                           | 3     |
| Japan                                            | 3     |

**Appendix Table 15: GBD 2016 location hierarchy with levels**

| Location  | Level |
|-----------|-------|
| Aichi     | 4     |
| Akita     | 4     |
| Aomori    | 4     |
| Chiba     | 4     |
| Ehime     | 4     |
| Fukui     | 4     |
| Fukuoka   | 4     |
| Fukushima | 4     |
| Gifu      | 4     |
| Gunma     | 4     |
| Hiroshima | 4     |
| Hokkaidō  | 4     |
| Hyōgo     | 4     |
| Ibaraki   | 4     |
| Ishikawa  | 4     |
| Iwate     | 4     |
| Kagawa    | 4     |
| Kagoshima | 4     |
| Kanagawa  | 4     |
| Kōchi     | 4     |
| Kumamoto  | 4     |
| Kyōto     | 4     |
| Mie       | 4     |
| Miyagi    | 4     |
| Miyazaki  | 4     |
| Nagano    | 4     |
| Nagasaki  | 4     |
| Nara      | 4     |
| Niigata   | 4     |
| Ōita      | 4     |
| Okayama   | 4     |
| Okinawa   | 4     |
| Ōsaka     | 4     |
| Saga      | 4     |
| Saitama   | 4     |
| Shiga     | 4     |
| Shimane   | 4     |
| Shizuoka  | 4     |
| Tochigi   | 4     |
| Tokushima | 4     |
| Tōkyō     | 4     |
| Tottori   | 4     |
| Toyama    | 4     |
| Wakayama  | 4     |
| Yamagata  | 4     |
| Yamaguchi | 4     |

**Appendix Table 15: GBD 2016 location hierarchy with levels**

| Location                | Level |
|-------------------------|-------|
| Yamanashi               | 4     |
| South Korea             | 3     |
| Singapore               | 3     |
| Australasia             | 2     |
| Australia               | 3     |
| New Zealand             | 3     |
| Western Europe          | 2     |
| Andorra                 | 3     |
| Austria                 | 3     |
| Belgium                 | 3     |
| Cyprus                  | 3     |
| Denmark                 | 3     |
| Finland                 | 3     |
| France                  | 3     |
| Germany                 | 3     |
| Greece                  | 3     |
| Iceland                 | 3     |
| Ireland                 | 3     |
| Israel                  | 3     |
| Italy                   | 3     |
| Luxembourg              | 3     |
| Malta                   | 3     |
| Netherlands             | 3     |
| Norway                  | 3     |
| Portugal                | 3     |
| Spain                   | 3     |
| Sweden                  | 3     |
| Stockholm               | 4     |
| Sweden except Stockholm | 4     |
| Switzerland             | 3     |
| United Kingdom          | 3     |
| England                 | 4     |
| East Midlands           | 5     |
| Derby                   | 6     |
| Derbyshire              | 6     |
| Leicester               | 6     |
| Leicestershire          | 6     |
| Lincolnshire            | 6     |
| Northamptonshire        | 6     |
| Nottingham              | 6     |
| Nottinghamshire         | 6     |
| Rutland                 | 6     |
| East of England         | 5     |
| Bedford                 | 6     |
| Cambridgeshire          | 6     |
| Central Bedfordshire    | 6     |



**Appendix Table 15: GBD 2016 location hierarchy with levels**

| Location               | Level |
|------------------------|-------|
| Essex                  | 6     |
| Hertfordshire          | 6     |
| Luton                  | 6     |
| Norfolk                | 6     |
| Peterborough           | 6     |
| Southend-on-Sea        | 6     |
| Suffolk                | 6     |
| Thurrock               | 6     |
| Greater London         | 5     |
| Barking and Dagenham   | 6     |
| Barnet                 | 6     |
| Bexley                 | 6     |
| Brent                  | 6     |
| Bromley                | 6     |
| Camden                 | 6     |
| Croydon                | 6     |
| Ealing                 | 6     |
| Enfield                | 6     |
| Greenwich              | 6     |
| Hackney                | 6     |
| Hammersmith and Fulham | 6     |
| Haringey               | 6     |
| Harrow                 | 6     |
| Havering               | 6     |
| Hillingdon             | 6     |
| Hounslow               | 6     |
| Islington              | 6     |
| Kensington and Chelsea | 6     |
| Kingston upon Thames   | 6     |
| Lambeth                | 6     |
| Lewisham               | 6     |
| Merton                 | 6     |
| Newham                 | 6     |
| Redbridge              | 6     |
| Richmond upon Thames   | 6     |
| Southwark              | 6     |
| Sutton                 | 6     |
| Tower Hamlets          | 6     |
| Waltham Forest         | 6     |
| Wandsworth             | 6     |
| Westminster            | 6     |
| North East England     | 5     |
| County Durham          | 6     |
| Darlington             | 6     |
| Gateshead              | 6     |
| Hartlepool             | 6     |

**Appendix Table 15: GBD 2016 location hierarchy with levels**

| Location                  | Level |
|---------------------------|-------|
| Middlesbrough             | 6     |
| Newcastle upon Tyne       | 6     |
| North Tyneside            | 6     |
| Northumberland            | 6     |
| Redcar and Cleveland      | 6     |
| South Tyneside            | 6     |
| Stockton-on-Tees          | 6     |
| Sunderland                | 6     |
| North West England        | 5     |
| Blackburn with Darwen     | 6     |
| Blackpool                 | 6     |
| Bolton                    | 6     |
| Bury                      | 6     |
| Cheshire East             | 6     |
| Cheshire West and Chester | 6     |
| Cumbria                   | 6     |
| Halton                    | 6     |
| Knowsley                  | 6     |
| Lancashire                | 6     |
| Liverpool                 | 6     |
| Manchester                | 6     |
| Oldham                    | 6     |
| Rochdale                  | 6     |
| Salford                   | 6     |
| Sefton                    | 6     |
| St Helens                 | 6     |
| Stockport                 | 6     |
| Tameside                  | 6     |
| Trafford                  | 6     |
| Warrington                | 6     |
| Wigan                     | 6     |
| Wirral                    | 6     |
| South East England        | 5     |
| Bracknell Forest          | 6     |
| Brighton and Hove         | 6     |
| Buckinghamshire           | 6     |
| East Sussex               | 6     |
| Hampshire                 | 6     |
| Isle of Wight             | 6     |
| Kent                      | 6     |
| Medway                    | 6     |
| Milton Keynes             | 6     |
| Oxfordshire               | 6     |
| Portsmouth                | 6     |
| Reading                   | 6     |
| Slough                    | 6     |

**Appendix Table 15: GBD 2016 location hierarchy with levels**

| Location                     | Level |
|------------------------------|-------|
| Southampton                  | 6     |
| Surrey                       | 6     |
| West Berkshire               | 6     |
| West Sussex                  | 6     |
| Windsor and Maidenhead       | 6     |
| Wokingham                    | 6     |
| South West England           | 5     |
| Bath and North East Somerset | 6     |
| Bournemouth                  | 6     |
| Bristol, City of             | 6     |
| Cornwall                     | 6     |
| Devon                        | 6     |
| Dorset                       | 6     |
| Gloucestershire              | 6     |
| North Somerset               | 6     |
| Plymouth                     | 6     |
| Poole                        | 6     |
| Somerset                     | 6     |
| South Gloucestershire        | 6     |
| Swindon                      | 6     |
| Torbay                       | 6     |
| Wiltshire                    | 6     |
| West Midlands                | 5     |
| Birmingham                   | 6     |
| Coventry                     | 6     |
| Dudley                       | 6     |
| Herefordshire, County of     | 6     |
| Sandwell                     | 6     |
| Shropshire                   | 6     |
| Solihull                     | 6     |
| Staffordshire                | 6     |
| Stoke-on-Trent               | 6     |
| Telford and Wrekin           | 6     |
| Walsall                      | 6     |
| Warwickshire                 | 6     |
| Wolverhampton                | 6     |
| Worcestershire               | 6     |
| Yorkshire and the Humber     | 5     |
| Barnsley                     | 6     |
| Bradford                     | 6     |
| Calderdale                   | 6     |
| Doncaster                    | 6     |
| East Riding of Yorkshire     | 6     |
| Kingston upon Hull, City of  | 6     |
| Kirklees                     | 6     |
| Leeds                        | 6     |

**Appendix Table 15: GBD 2016 location hierarchy with levels**

| Location                  | Level |
|---------------------------|-------|
| North East Lincolnshire   | 6     |
| North Lincolnshire        | 6     |
| North Yorkshire           | 6     |
| Rotherham                 | 6     |
| Sheffield                 | 6     |
| Wakefield                 | 6     |
| York                      | 6     |
| Northern Ireland          | 4     |
| Scotland                  | 4     |
| Wales                     | 4     |
| Southern Latin America    | 2     |
| Argentina                 | 3     |
| Chile                     | 3     |
| Uruguay                   | 3     |
| High-income North America | 2     |
| Canada                    | 3     |
| Greenland                 | 3     |
| USA                       | 3     |
| Alabama                   | 4     |
| Alaska                    | 4     |
| Arizona                   | 4     |
| Arkansas                  | 4     |
| California                | 4     |
| Colorado                  | 4     |
| Connecticut               | 4     |
| Delaware                  | 4     |
| District of Columbia      | 4     |
| Florida                   | 4     |
| Georgia                   | 3     |
| Georgia                   | 4     |
| Hawaii                    | 4     |
| Idaho                     | 4     |
| Illinois                  | 4     |
| Indiana                   | 4     |
| Iowa                      | 4     |
| Kansas                    | 4     |
| Kentucky                  | 4     |
| Louisiana                 | 4     |
| Maine                     | 4     |
| Maryland                  | 4     |
| Massachusetts             | 4     |
| Michigan                  | 4     |
| Minnesota                 | 4     |
| Mississippi               | 4     |
| Missouri                  | 4     |
| Montana                   | 4     |

**Appendix Table 15: GBD 2016 location hierarchy with levels**

| Location                         | Level |
|----------------------------------|-------|
| Nebraska                         | 4     |
| Nevada                           | 4     |
| New Hampshire                    | 4     |
| New Jersey                       | 4     |
| New Mexico                       | 4     |
| New York                         | 4     |
| North Carolina                   | 4     |
| North Dakota                     | 4     |
| Ohio                             | 4     |
| Oklahoma                         | 4     |
| Oregon                           | 4     |
| Pennsylvania                     | 4     |
| Rhode Island                     | 4     |
| South Carolina                   | 4     |
| South Dakota                     | 4     |
| Tennessee                        | 4     |
| Texas                            | 4     |
| Utah                             | 4     |
| Vermont                          | 4     |
| Virginia                         | 4     |
| Washington                       | 4     |
| West Virginia                    | 4     |
| Wisconsin                        | 4     |
| Wyoming                          | 4     |
| Latin America and Caribbean      | 1     |
| Caribbean                        | 2     |
| Antigua and Barbuda              | 3     |
| The Bahamas                      | 3     |
| Barbados                         | 3     |
| Belize                           | 3     |
| Bermuda                          | 3     |
| Cuba                             | 3     |
| Dominica                         | 3     |
| Dominican Republic               | 3     |
| Grenada                          | 3     |
| Guyana                           | 3     |
| Haiti                            | 3     |
| Jamaica                          | 3     |
| Puerto Rico                      | 3     |
| Saint Lucia                      | 3     |
| Saint Vincent and the Grenadines | 3     |
| Suriname                         | 3     |
| Trinidad and Tobago              | 3     |
| Virgin Islands, U.S.             | 3     |
| Andean Latin America             | 2     |
| Bolivia                          | 3     |

**Appendix Table 15: GBD 2016 location hierarchy with levels**

| Location                        | Level |
|---------------------------------|-------|
| Ecuador                         | 3     |
| Peru                            | 3     |
| Central Latin America           | 2     |
| Colombia                        | 3     |
| Costa Rica                      | 3     |
| El Salvador                     | 3     |
| Guatemala                       | 3     |
| Honduras                        | 3     |
| Mexico                          | 3     |
| Aguascalientes                  | 4     |
| Baja California                 | 4     |
| Baja California Sur             | 4     |
| Campeche                        | 4     |
| Chiapas                         | 4     |
| Chihuahua                       | 4     |
| Coahuila                        | 4     |
| Colima                          | 4     |
| Distrito Federal                | 4     |
| Distrito Federal                | 4     |
| Durango                         | 4     |
| Guanajuato                      | 4     |
| Guerrero                        | 4     |
| Hidalgo                         | 4     |
| Jalisco                         | 4     |
| México                          | 4     |
| Michoacán de Ocampo             | 4     |
| Morelos                         | 4     |
| Nayarit                         | 4     |
| Nuevo León                      | 4     |
| Oaxaca                          | 4     |
| Puebla                          | 4     |
| Querétaro                       | 4     |
| Quintana Roo                    | 4     |
| San Luis Potosí                 | 4     |
| Sinaloa                         | 4     |
| Sonora                          | 4     |
| Tabasco                         | 4     |
| Tamaulipas                      | 4     |
| Tlaxcala                        | 4     |
| Veracruz de Ignacio de la Llave | 4     |
| Yucatán                         | 4     |
| Zacatecas                       | 4     |
| Nicaragua                       | 3     |
| Panama                          | 3     |
| Venezuela                       | 3     |
| Tropical Latin America          | 2     |

**Appendix Table 15: GBD 2016 location hierarchy with levels**

| Location                     | Level |
|------------------------------|-------|
| Brazil                       | 3     |
| Acre                         | 4     |
| Alagoas                      | 4     |
| Amapá                        | 4     |
| Amazonas                     | 4     |
| Bahia                        | 4     |
| Ceará                        | 4     |
| Distrito Federal             | 4     |
| Distrito Federal             | 4     |
| Espírito Santo               | 4     |
| Goiás                        | 4     |
| Maranhão                     | 4     |
| Mato Grosso                  | 4     |
| Mato Grosso do Sul           | 4     |
| Minas Gerais                 | 4     |
| Pará                         | 4     |
| Paraíba                      | 4     |
| Paraná                       | 4     |
| Pernambuco                   | 4     |
| Piauí                        | 4     |
| Rio de Janeiro               | 4     |
| Rio Grande do Norte          | 4     |
| Rio Grande do Sul            | 4     |
| Rondônia                     | 4     |
| Roraima                      | 4     |
| Santa Catarina               | 4     |
| São Paulo                    | 4     |
| Sergipe                      | 4     |
| Tocantins                    | 4     |
| Paraguay                     | 3     |
| North Africa and Middle East | 1     |
| North Africa and Middle East | 2     |
| Afghanistan                  | 3     |
| Algeria                      | 3     |
| Bahrain                      | 3     |
| Egypt                        | 3     |
| Iran                         | 3     |
| Iraq                         | 3     |
| Jordan                       | 3     |
| Kuwait                       | 3     |
| Lebanon                      | 3     |
| Libya                        | 3     |
| Morocco                      | 3     |
| Palestine                    | 3     |
| Oman                         | 3     |
| Qatar                        | 3     |

**Appendix Table 15: GBD 2016 location hierarchy with levels**

| Location                 | Level |
|--------------------------|-------|
| Saudi Arabia             | 3     |
| 'Asir                    | 4     |
| Bahah                    | 4     |
| Eastern Province         | 4     |
| Ha'il                    | 4     |
| Jawf                     | 4     |
| Jizan                    | 4     |
| Madinah                  | 4     |
| Makkah                   | 4     |
| Najran                   | 4     |
| Northern Borders         | 4     |
| Qassim                   | 4     |
| Riyadh                   | 4     |
| Tabuk                    | 4     |
| Sudan                    | 3     |
| Syria                    | 3     |
| Tunisia                  | 3     |
| Turkey                   | 3     |
| United Arab Emirates     | 3     |
| Yemen                    | 3     |
| South Asia               | 1     |
| South Asia               | 2     |
| Bangladesh               | 3     |
| Bhutan                   | 3     |
| India                    | 3     |
| Andhra Pradesh           | 4     |
| Andhra Pradesh, Rural    | 5     |
| Andhra Pradesh, Urban    | 5     |
| Arunāchal Pradesh        | 4     |
| Arunāchal Pradesh, Rural | 5     |
| Arunāchal Pradesh, Urban | 5     |
| Assam                    | 4     |
| Assam, Rural             | 5     |
| Assam, Urban             | 5     |
| Bihār                    | 4     |
| Bihār, Rural             | 5     |
| Bihār, Urban             | 5     |
| Chhattīsgarh             | 4     |
| Chhattīsgarh, Rural      | 5     |
| Chhattīsgarh, Urban      | 5     |
| Delhi                    | 4     |
| Delhi, Rural             | 5     |
| Delhi, Urban             | 5     |
| Goa                      | 4     |
| Goa, Rural               | 5     |
| Goa, Urban               | 5     |



**Appendix Table 15: GBD 2016 location hierarchy with levels**

| Location                 | Level |
|--------------------------|-------|
| Gujarāt                  | 4     |
| Gujarāt, Rural           | 5     |
| Gujarāt, Urban           | 5     |
| Haryāna                  | 4     |
| Haryāna, Rural           | 5     |
| Haryāna, Urban           | 5     |
| Himachal Pradesh         | 4     |
| Himachal Pradesh, Rural  | 5     |
| Himachal Pradesh, Urban  | 5     |
| Jammu and Kashmīr        | 4     |
| Jammu and Kashmīr, Rural | 5     |
| Jammu and Kashmīr, Urban | 5     |
| Jharkhand                | 4     |
| Jharkhand, Rural         | 5     |
| Jharkhand, Urban         | 5     |
| Karnātaka                | 4     |
| Karnātaka, Rural         | 5     |
| Karnātaka, Urban         | 5     |
| Kerala                   | 4     |
| Kerala, Rural            | 5     |
| Kerala, Urban            | 5     |
| Madhya Pradesh           | 4     |
| Madhya Pradesh, Rural    | 5     |
| Madhya Pradesh, Urban    | 5     |
| Mahārāshtra              | 4     |
| Mahārāshtra, Rural       | 5     |
| Mahārāshtra, Urban       | 5     |
| Manipur                  | 4     |
| Manipur, Rural           | 5     |
| Manipur, Urban           | 5     |
| Meghālaya                | 4     |
| Meghālaya, Rural         | 5     |
| Meghālaya, Urban         | 5     |
| Mizoram                  | 4     |
| Mizoram, Rural           | 5     |
| Mizoram, Urban           | 5     |
| Nāgāland                 | 4     |
| Nāgāland, Rural          | 5     |
| Nāgāland, Urban          | 5     |
| Orissa                   | 4     |
| Orissa, Rural            | 5     |
| Orissa, Urban            | 5     |
| Punjab                   | 4     |
| Punjab, Rural            | 5     |
| Punjab, Urban            | 5     |
| Rājasthān                | 4     |

**Appendix Table 15: GBD 2016 location hierarchy with levels**

| Location                         | Level |
|----------------------------------|-------|
| Rājasthān, Rural                 | 5     |
| Rājasthān, Urban                 | 5     |
| Sikkim                           | 4     |
| Sikkim, Rural                    | 5     |
| Sikkim, Urban                    | 5     |
| Tamil Nādu                       | 4     |
| Tamil Nādu, Rural                | 5     |
| Tamil Nādu, Urban                | 5     |
| Telangana                        | 4     |
| Telangana, Rural                 | 5     |
| Telangana, Urban                 | 5     |
| Tripura                          | 4     |
| Tripura, Rural                   | 5     |
| Tripura, Urban                   | 5     |
| Uttar Pradesh                    | 4     |
| Uttar Pradesh, Rural             | 5     |
| Uttar Pradesh, Urban             | 5     |
| Uttarakhand                      | 4     |
| Uttarakhand, Rural               | 5     |
| Uttarakhand, Urban               | 5     |
| West Bengal                      | 4     |
| West Bengal, Rural               | 5     |
| West Bengal, Urban               | 5     |
| The Six Minor Territories        | 4     |
| The Six Minor Territories, Rural | 5     |
| The Six Minor Territories, Urban | 5     |
| Nepal                            | 3     |
| Pakistan                         | 3     |
| Sub-Saharan Africa               | 1     |
| Central Sub-Saharan Africa       | 2     |
| Angola                           | 3     |
| Central African Republic         | 3     |
| Congo (Brazzaville)              | 3     |
| Democratic Republic of the Congo | 3     |
| Equatorial Guinea                | 3     |
| Gabon                            | 3     |
| Eastern Sub-Saharan Africa       | 2     |
| Burundi                          | 3     |
| Comoros                          | 3     |
| Djibouti                         | 3     |
| Eritrea                          | 3     |
| Ethiopia                         | 3     |
| Kenya                            | 3     |
| Baringo                          | 4     |
| Bomet                            | 4     |
| Bungoma                          | 4     |

**Appendix Table 15: GBD 2016 location hierarchy with levels**

| Location        | Level |
|-----------------|-------|
| Busia           | 4     |
| Elgeyo-Marakwet | 4     |
| Embu            | 4     |
| Garissa         | 4     |
| HomaBay         | 4     |
| Isiolo          | 4     |
| Kajiado         | 4     |
| Kakamega        | 4     |
| Kericho         | 4     |
| Kiambu          | 4     |
| Kilifi          | 4     |
| Kirinyaga       | 4     |
| Kisii           | 4     |
| Kisumu          | 4     |
| Kitui           | 4     |
| Kwale           | 4     |
| Laikipia        | 4     |
| Lamu            | 4     |
| Machakos        | 4     |
| Makueni         | 4     |
| Mandera         | 4     |
| Marsabit        | 4     |
| Meru            | 4     |
| Migori          | 4     |
| Mombasa         | 4     |
| Murang'a        | 4     |
| Nairobi         | 4     |
| Nakuru          | 4     |
| Nandi           | 4     |
| Narok           | 4     |
| Nyamira         | 4     |
| Nyandarua       | 4     |
| Nyeri           | 4     |
| Samburu         | 4     |
| Siaya           | 4     |
| TaitaTaveta     | 4     |
| TanaRiver       | 4     |
| TharakaNithi    | 4     |
| TransNzoia      | 4     |
| Turkana         | 4     |
| UasinGishu      | 4     |
| Vihiga          | 4     |
| Wajir           | 4     |
| WestPokot       | 4     |
| Madagascar      | 3     |
| Malawi          | 3     |

**Appendix Table 15: GBD 2016 location hierarchy with levels**

| Location                    | Level |
|-----------------------------|-------|
| Mozambique                  | 3     |
| Rwanda                      | 3     |
| Somalia                     | 3     |
| South Sudan                 | 3     |
| Tanzania                    | 3     |
| Uganda                      | 3     |
| Zambia                      | 3     |
| Southern Sub-Saharan Africa | 2     |
| Botswana                    | 3     |
| Lesotho                     | 3     |
| Namibia                     | 3     |
| South Africa                | 3     |
| Eastern Cape                | 4     |
| Free State                  | 4     |
| Gauteng                     | 4     |
| KwaZulu-Natal               | 4     |
| Limpopo                     | 4     |
| Mpumalanga                  | 4     |
| North-West                  | 4     |
| Northern Cape               | 4     |
| Western Cape                | 4     |
| Swaziland                   | 3     |
| Zimbabwe                    | 3     |
| Western Sub-Saharan Africa  | 2     |
| Benin                       | 3     |
| Burkina Faso                | 3     |
| Cameroon                    | 3     |
| Cape Verde                  | 3     |
| Chad                        | 3     |
| Cote d'Ivoire               | 3     |
| The Gambia                  | 3     |
| Ghana                       | 3     |
| Guinea                      | 3     |
| Guinea-Bissau               | 3     |
| Liberia                     | 3     |
| Mali                        | 3     |
| Mauritania                  | 3     |
| Niger                       | 3     |
| Nigeria                     | 3     |
| Sao Tome and Principe       | 3     |
| Senegal                     | 3     |
| Sierra Leone                | 3     |
| Togo                        | 3     |

**Appendix Table 16. Causes included in the 2016 Global Burden of Disease Study**

| Cause level | Cause                                                                         | Cause of death | Cause of burden |
|-------------|-------------------------------------------------------------------------------|----------------|-----------------|
| 0           | All causes                                                                    | X              | X               |
| 1           | Communicable, maternal, neonatal, and nutritional disorders                   | X              | X               |
| 2           | HIV/AIDS and tuberculosis                                                     | X              | X               |
| 3           | Tuberculosis                                                                  | X              | X               |
| 4           | Drug-sensitive tuberculosis                                                   | X              | X               |
| 4           | Multidrug-resistant tuberculosis without extensive drug resistance            | X              | X               |
| 4           | Extensively drug-resistant tuberculosis                                       | X              | X               |
| 4           | Latent tuberculosis infection                                                 |                | X               |
| 3           | HIV/AIDS                                                                      | X              | X               |
| 4           | Drug-sensitive HIV/AIDS - Tuberculosis                                        | X              | X               |
| 4           | Multidrug-resistant HIV/AIDS - Tuberculosis without extensive drug resistance | X              | X               |
| 4           | Extensively drug-resistant HIV/AIDS - Tuberculosis                            | X              | X               |
| 4           | HIV/AIDS resulting in other diseases                                          | X              | X               |
| 2           | Diarrhoea, lower respiratory infections, and other common infectious diseases | X              | X               |
| 3           | Diarrhoeal diseases                                                           | X              | X               |
| 3           | Intestinal infectious diseases                                                | X              | X               |
| 4           | Typhoid fever                                                                 | X              | X               |
| 4           | Paratyphoid fever                                                             | X              | X               |
| 4           | Other intestinal infectious diseases                                          | X              | X               |
| 3           | Lower respiratory infections                                                  | X              | X               |
| 3           | Upper respiratory infections                                                  | X              | X               |
| 3           | Otitis media                                                                  | X              | X               |
| 3           | Meningitis                                                                    | X              | X               |
| 4           | Pneumococcal meningitis                                                       | X              | X               |
| 4           | H influenzae type B meningitis                                                | X              | X               |
| 4           | Meningococcal infection                                                       | X              | X               |

**Appendix Table 16. Causes included in the 2016 Global Burden of Disease Study**

| Cause level | Cause                                     | Cause of death | Cause of burden |
|-------------|-------------------------------------------|----------------|-----------------|
| 4           | Other meningitis                          | X              | X               |
| 3           | Encephalitis                              | X              | X               |
| 3           | Diphtheria                                | X              | X               |
| 3           | Whooping cough                            | X              | X               |
| 3           | Tetanus                                   | X              | X               |
| 3           | Measles                                   | X              | X               |
| 3           | Varicella and herpes zoster               | X              | X               |
| 2           | Neglected tropical diseases and malaria   | X              | X               |
| 3           | Malaria                                   | X              | X               |
| 3           | Chagas disease                            | X              | X               |
| 3           | Leishmaniasis                             | X              | X               |
| 4           | Visceral leishmaniasis                    | X              | X               |
| 4           | Cutaneous and mucocutaneous leishmaniasis |                | X               |
| 3           | African trypanosomiasis                   | X              | X               |
| 3           | Schistosomiasis                           | X              | X               |
| 3           | Cysticercosis                             | X              | X               |
| 3           | Cystic echinococcosis                     | X              | X               |
| 3           | Lymphatic filariasis                      |                | X               |
| 3           | Onchocerciasis                            |                | X               |
| 3           | Trachoma                                  |                | X               |
| 3           | Dengue                                    | X              | X               |
| 3           | Yellow fever                              | X              | X               |
| 3           | Rabies                                    | X              | X               |
| 3           | Intestinal nematode infections            | X              | X               |
| 4           | Ascariasis                                | X              | X               |
| 4           | Trichuriasis                              |                | X               |

**Appendix Table 16. Causes included in the 2016 Global Burden of Disease Study**

| Cause level | Cause                                                    | Cause of death | Cause of burden |
|-------------|----------------------------------------------------------|----------------|-----------------|
| 4           | Hookworm disease                                         |                | X               |
| 3           | Food-borne trematodiasis                                 |                | X               |
| 3           | Leprosy                                                  |                | X               |
| 3           | Ebola                                                    | X              | X               |
| 3           | Zika virus                                               | X              | X               |
| 3           | Guinea worm disease                                      |                | X               |
| 3           | Other neglected tropical diseases                        | X              | X               |
| 2           | Maternal disorders                                       | X              | X               |
| 3           | Maternal haemorrhage                                     | X              | X               |
| 3           | Maternal sepsis and other pregnancy related infections   | X              | X               |
| 3           | Maternal hypertensive disorders                          | X              | X               |
| 3           | Maternal obstructed labour and uterine rupture           | X              | X               |
| 3           | Maternal abortion, miscarriage, and ectopic pregnancy    | X              | X               |
| 3           | Indirect maternal deaths                                 | X              |                 |
| 3           | Late maternal deaths                                     | X              |                 |
| 3           | Maternal deaths aggravated by HIV/AIDS                   | X              |                 |
| 3           | Other maternal disorders                                 | X              | X               |
| 2           | Neonatal disorders                                       | X              | X               |
| 3           | Neonatal preterm birth complications                     | X              | X               |
| 3           | Neonatal encephalopathy due to birth asphyxia and trauma | X              | X               |
| 3           | Neonatal sepsis and other neonatal infections            | X              | X               |
| 3           | Hemolytic disease and other neonatal jaundice            | X              | X               |
| 3           | Other neonatal disorders                                 | X              | X               |
| 2           | Nutritional deficiencies                                 | X              | X               |
| 3           | Protein-energy malnutrition                              | X              | X               |
| 3           | Iodine deficiency                                        | X              | X               |

**Appendix Table 16. Causes included in the 2016 Global Burden of Disease Study**

| Cause level | Cause                                                            | Cause of death | Cause of burden |
|-------------|------------------------------------------------------------------|----------------|-----------------|
| 3           | Vitamin A deficiency                                             |                | X               |
| 3           | Iron-deficiency anaemia                                          | X              | X               |
| 3           | Other nutritional deficiencies                                   | X              | X               |
| 2           | Other communicable, maternal, neonatal, and nutritional diseases | X              | X               |
| 3           | Sexually transmitted diseases excluding HIV                      | X              | X               |
| 4           | Syphilis                                                         | X              | X               |
| 4           | Chlamydial infection                                             | X              | X               |
| 4           | Gonococcal infection                                             | X              | X               |
| 4           | Trichomoniasis                                                   |                | X               |
| 4           | Genital herpes                                                   |                | X               |
| 4           | Other sexually transmitted diseases                              | X              | X               |
| 3           | Hepatitis                                                        | X              | X               |
| 4           | Acute hepatitis A                                                | X              | X               |
| 4           | Hepatitis B                                                      | X              | X               |
| 4           | Hepatitis C                                                      | X              | X               |
| 4           | Acute hepatitis E                                                | X              | X               |
| 3           | Other infectious diseases                                        | X              | X               |
| 1           | Non-communicable diseases                                        | X              | X               |
| 2           | Neoplasms                                                        | X              | X               |
| 3           | Lip and oral cavity cancer                                       | X              | X               |
| 3           | Nasopharynx cancer                                               | X              | X               |
| 3           | Other pharynx cancer                                             | X              | X               |
| 3           | Oesophageal cancer                                               | X              | X               |
| 3           | Stomach cancer                                                   | X              | X               |
| 3           | Colon and rectum cancer                                          | X              | X               |
| 3           | Liver cancer                                                     | X              | X               |



**Appendix Table 16. Causes included in the 2016 Global Burden of Disease Study**

| Cause level | Cause                                              | Cause of death | Cause of burden |
|-------------|----------------------------------------------------|----------------|-----------------|
| 4           | Liver cancer due to hepatitis B                    | X              | X               |
| 4           | Liver cancer due to hepatitis C                    | X              | X               |
| 4           | Liver cancer due to alcohol use                    | X              | X               |
| 4           | Liver cancer due to other causes                   | X              | X               |
| 3           | Gallbladder and biliary tract cancer               | X              | X               |
| 3           | Pancreatic cancer                                  | X              | X               |
| 3           | Larynx cancer                                      | X              | X               |
| 3           | Tracheal, bronchus, and lung cancer                | X              | X               |
| 3           | Malignant skin melanoma                            | X              | X               |
| 3           | Non-melanoma skin cancer                           | X              | X               |
| 4           | Non-melanoma skin cancer (squamous-cell carcinoma) | X              | X               |
| 4           | Non-melanoma skin cancer (basal-cell carcinoma)    |                | X               |
| 3           | Breast cancer                                      | X              | X               |
| 3           | Cervical cancer                                    | X              | X               |
| 3           | Uterine cancer                                     | X              | X               |
| 3           | Ovarian cancer                                     | X              | X               |
| 3           | Prostate cancer                                    | X              | X               |
| 3           | Testicular cancer                                  | X              | X               |
| 3           | Kidney cancer                                      | X              | X               |
| 3           | Bladder cancer                                     | X              | X               |
| 3           | Brain and nervous system cancer                    | X              | X               |
| 3           | Thyroid cancer                                     | X              | X               |
| 3           | Mesothelioma                                       | X              | X               |
| 3           | Hodgkin lymphoma                                   | X              | X               |
| 3           | Non-Hodgkin's lymphoma                             | X              | X               |
| 3           | Multiple myeloma                                   | X              | X               |

**Appendix Table 16. Causes included in the 2016 Global Burden of Disease Study**

| Cause level | Cause                                         | Cause of death | Cause of burden |
|-------------|-----------------------------------------------|----------------|-----------------|
| 3           | Leukaemia                                     | X              | X               |
| 4           | Acute lymphoid leukaemia                      | X              | X               |
| 4           | Chronic lymphoid leukaemia                    | X              | X               |
| 4           | Acute myeloid leukaemia                       | X              | X               |
| 4           | Chronic myeloid leukaemia                     | X              | X               |
| 4           | Other leukaemia                               | X              | X               |
| 3           | Other neoplasms                               | X              | X               |
| 2           | Cardiovascular diseases                       | X              | X               |
| 3           | Rheumatic heart disease                       | X              | X               |
| 3           | Ischaemic heart disease                       | X              | X               |
| 3           | Cerebrovascular disease                       | X              | X               |
| 4           | Ischaemic stroke                              | X              | X               |
| 4           | Hemorrhagic stroke                            | X              | X               |
| 3           | Hypertensive heart disease                    | X              | X               |
| 3           | Cardiomyopathy and myocarditis                | X              | X               |
| 4           | Myocarditis                                   | X              | X               |
| 4           | Alcoholic cardiomyopathy                      | X              | X               |
| 4           | Other cardiomyopathy                          | X              | X               |
| 3           | Atrial fibrillation and flutter               | X              | X               |
| 3           | Aortic aneurysm                               | X              |                 |
| 3           | Peripheral vascular disease                   | X              | X               |
| 3           | Endocarditis                                  | X              | X               |
| 3           | Other cardiovascular and circulatory diseases | X              | X               |
| 2           | Chronic respiratory diseases                  | X              | X               |
| 3           | Chronic obstructive pulmonary disease         | X              | X               |
| 3           | Pneumoconiosis                                | X              | X               |

**Appendix Table 16. Causes included in the 2016 Global Burden of Disease Study**

| Cause level | Cause                                                          | Cause of death | Cause of burden |
|-------------|----------------------------------------------------------------|----------------|-----------------|
| 4           | Silicosis                                                      | X              | X               |
| 4           | Asbestosis                                                     | X              | X               |
| 4           | Coal workers pneumoconiosis                                    | X              | X               |
| 4           | Other pneumoconiosis                                           | X              | X               |
| 3           | Asthma                                                         | X              | X               |
| 3           | Interstitial lung disease and pulmonary sarcoidosis            | X              | X               |
| 3           | Other chronic respiratory diseases                             | X              | X               |
| 2           | Cirrhosis and other chronic liver diseases                     | X              | X               |
| 3           | Cirrhosis and other chronic liver diseases due to hepatitis B  | X              | X               |
| 3           | Cirrhosis and other chronic liver diseases due to hepatitis C  | X              | X               |
| 3           | Cirrhosis and other chronic liver diseases due to alcohol use  | X              | X               |
| 3           | Cirrhosis and other chronic liver diseases due to other causes | X              | X               |
| 2           | Digestive diseases                                             | X              | X               |
| 3           | Peptic ulcer disease                                           | X              | X               |
| 3           | Gastritis and duodenitis                                       | X              | X               |
| 3           | Appendicitis                                                   | X              | X               |
| 3           | Paralytic ileus and intestinal obstruction                     | X              | X               |
| 3           | Inguinal, femoral, and abdominal hernia                        | X              | X               |
| 3           | Inflammatory bowel disease                                     | X              | X               |
| 3           | Vascular intestinal disorders                                  | X              | X               |
| 3           | Gallbladder and biliary diseases                               | X              | X               |
| 3           | Pancreatitis                                                   | X              | X               |
| 3           | Other digestive diseases                                       | X              | X               |
| 2           | Neurological disorders                                         | X              | X               |
| 3           | Alzheimer's disease and other dementias                        | X              | X               |
| 3           | Parkinson's disease                                            | X              | X               |

**Appendix Table 16. Causes included in the 2016 Global Burden of Disease Study**

| Cause level | Cause                                                   | Cause of death | Cause of burden |
|-------------|---------------------------------------------------------|----------------|-----------------|
| 3           | Epilepsy                                                | X              | X               |
| 3           | Multiple sclerosis                                      | X              | X               |
| 3           | Motor neuron disease                                    | X              | X               |
| 3           | Migraine                                                |                | X               |
| 3           | Tension-type headache                                   |                | X               |
| 3           | Other neurological disorders                            | X              | X               |
| 2           | Mental and substance use disorders                      | X              | X               |
| 3           | Schizophrenia                                           |                | X               |
| 3           | Alcohol use disorders                                   | X              | X               |
| 3           | Drug use disorders                                      | X              | X               |
| 4           | Opioid use disorders                                    | X              | X               |
| 4           | Cocaine use disorders                                   | X              | X               |
| 4           | Amphetamine use disorders                               | X              | X               |
| 4           | Cannabis use disorders                                  |                | X               |
| 4           | Other drug use disorders                                | X              | X               |
| 3           | Depressive disorders                                    |                | X               |
| 4           | Major depressive disorder                               |                | X               |
| 4           | Dysthymia                                               |                | X               |
| 3           | Bipolar disorder                                        |                | X               |
| 3           | Anxiety disorders                                       |                | X               |
| 3           | Eating disorders                                        | X              | X               |
| 4           | Anorexia nervosa                                        | X              | X               |
| 4           | Bulimia nervosa                                         | X              | X               |
| 3           | Autistic spectrum disorders                             |                | X               |
| 4           | Autism                                                  |                | X               |
| 4           | Asperger syndrome and other autistic spectrum disorders |                | X               |

**Appendix Table 16. Causes included in the 2016 Global Burden of Disease Study**

| Cause level | Cause                                               | Cause of death | Cause of burden |
|-------------|-----------------------------------------------------|----------------|-----------------|
| 3           | Attention-deficit/hyperactivity disorder            |                | X               |
| 3           | Conduct disorder                                    |                | X               |
| 3           | Idiopathic developmental intellectual disability    |                | X               |
| 3           | Other mental and substance use disorders            |                | X               |
| 2           | Diabetes, urogenital, blood, and endocrine diseases | X              | X               |
| 3           | Diabetes mellitus                                   | X              | X               |
| 3           | Acute glomerulonephritis                            | X              | X               |
| 3           | Chronic kidney disease                              | X              | X               |
| 4           | Chronic kidney disease due to diabetes mellitus     | X              | X               |
| 4           | Chronic kidney disease due to hypertension          | X              | X               |
| 4           | Chronic kidney disease due to glomerulonephritis    | X              | X               |
| 4           | Chronic kidney disease due to other causes          | X              | X               |
| 3           | Urinary diseases and male infertility               | X              | X               |
| 4           | Interstitial nephritis and urinary tract infections | X              | X               |
| 4           | Urolithiasis                                        | X              | X               |
| 4           | Benign prostatic hyperplasia                        |                | X               |
| 4           | Male infertility                                    |                | X               |
| 4           | Other urinary diseases                              | X              | X               |
| 3           | Gynecological diseases                              | X              | X               |
| 4           | Uterine fibroids                                    | X              | X               |
| 4           | Polycystic ovarian syndrome                         | X              | X               |
| 4           | Female infertility                                  |                | X               |
| 4           | Endometriosis                                       | X              | X               |
| 4           | Genital prolapse                                    | X              | X               |
| 4           | Premenstrual syndrome                               |                | X               |
| 4           | Other gynecological diseases                        | X              | X               |

**Appendix Table 16. Causes included in the 2016 Global Burden of Disease Study**

| Cause level | Cause                                             | Cause of death | Cause of burden |
|-------------|---------------------------------------------------|----------------|-----------------|
| 3           | Hemoglobinopathies and hemolytic anaemias         | X              | X               |
| 4           | Thalassemias                                      | X              | X               |
| 4           | Thalassaemias trait                               |                | X               |
| 4           | Sickle cell disorders                             | X              | X               |
| 4           | Sickle cell trait                                 |                | X               |
| 4           | G6PD deficiency                                   | X              | X               |
| 4           | G6PD trait                                        |                | X               |
| 4           | Other hemoglobinopathies and hemolytic anaemias   | X              | X               |
| 3           | Endocrine, metabolic, blood, and immune disorders | X              | X               |
| 2           | Musculoskeletal disorders                         | X              | X               |
| 3           | Rheumatoid arthritis                              | X              | X               |
| 3           | Osteoarthritis                                    |                | X               |
| 3           | Low back and neck pain                            |                | X               |
| 4           | Low back pain                                     |                | X               |
| 4           | Neck pain                                         |                | X               |
| 3           | Gout                                              |                | X               |
| 3           | Other musculoskeletal disorders                   | X              | X               |
| 2           | Other non-communicable diseases                   | X              | X               |
| 3           | Congenital anomalies                              | X              | X               |
| 4           | Neural tube defects                               | X              | X               |
| 4           | Congenital heart anomalies                        | X              | X               |
| 4           | Orofacial clefts                                  | X              | X               |
| 4           | Down's syndrome                                   | X              | X               |
| 4           | Turner syndrome                                   |                | X               |
| 4           | Klinefelter syndrome                              |                | X               |
| 4           | Other chromosomal abnormalities                   | X              | X               |

**Appendix Table 16. Causes included in the 2016 Global Burden of Disease Study**

| Cause level | Cause                                         | Cause of death | Cause of burden |
|-------------|-----------------------------------------------|----------------|-----------------|
| 4           | Congenital musculoskeletal and limb anomalies | X              | X               |
| 4           | Urogenital congenital anomalies               | X              | X               |
| 4           | Digestive congenital anomalies                | X              | X               |
| 4           | Other congenital anomalies                    | X              | X               |
| 3           | Skin and subcutaneous diseases                | X              | X               |
| 4           | Eczema                                        |                | X               |
| 4           | Psoriasis                                     |                | X               |
| 4           | Cellulitis                                    | X              | X               |
| 4           | Pyoderma                                      | X              | X               |
| 4           | Scabies                                       |                | X               |
| 4           | Fungal skin diseases                          |                | X               |
| 4           | Viral skin diseases                           |                | X               |
| 4           | Acne vulgaris                                 |                | X               |
| 4           | Alopecia areata                               |                | X               |
| 4           | Pruritus                                      |                | X               |
| 4           | Urticaria                                     |                | X               |
| 4           | Decubitus ulcer                               | X              | X               |
| 4           | Other skin and subcutaneous diseases          | X              | X               |
| 3           | Sense organ diseases                          |                | X               |
| 4           | Glaucoma                                      |                | X               |
| 4           | Cataract                                      |                | X               |
| 4           | Macular degeneration                          |                | X               |
| 4           | Refraction and accommodation disorders        |                | X               |
| 4           | Age-related and other hearing loss            |                | X               |
| 4           | Other vision loss                             |                | X               |
| 4           | Other sense organ diseases                    |                | X               |

**Appendix Table 16. Causes included in the 2016 Global Burden of Disease Study**

| Cause level | Cause                                | Cause of death | Cause of burden |
|-------------|--------------------------------------|----------------|-----------------|
| 3           | Oral disorders                       |                | X               |
| 4           | Deciduous caries                     |                | X               |
| 4           | Permanent caries                     |                | X               |
| 4           | Periodontal disease                  |                | X               |
| 4           | Edentulism and severe tooth loss     |                | X               |
| 4           | Other oral disorders                 |                | X               |
| 3           | Sudden infant death syndrome         | X              |                 |
| 1           | Injuries                             | X              | X               |
| 2           | Transport injuries                   | X              | X               |
| 3           | Road injuries                        | X              | X               |
| 4           | Pedestrian road injuries             | X              | X               |
| 4           | Cyclist road injuries                | X              | X               |
| 4           | Motorcyclist road injuries           | X              | X               |
| 4           | Motor vehicle road injuries          | X              | X               |
| 4           | Other road injuries                  | X              | X               |
| 3           | Other transport injuries             | X              | X               |
| 2           | Unintentional injuries               | X              | X               |
| 3           | Falls                                | X              | X               |
| 3           | Drowning                             | X              | X               |
| 3           | Fire, heat, and hot substances       | X              | X               |
| 3           | Poisonings                           | X              | X               |
| 3           | Exposure to mechanical forces        | X              | X               |
| 4           | Unintentional firearm injuries       | X              | X               |
| 4           | Unintentional suffocation            | X              | X               |
| 4           | Other exposure to mechanical forces  | X              | X               |
| 3           | Adverse effects of medical treatment | X              | X               |



**Appendix Table 16. Causes included in the 2016 Global Burden of Disease Study**

| Cause level | Cause                                                                        | Cause of death | Cause of burden |
|-------------|------------------------------------------------------------------------------|----------------|-----------------|
| 3           | Animal contact                                                               | X              | X               |
| 4           | Venomous animal contact                                                      | X              | X               |
| 4           | Non-venomous animal contact                                                  | X              | X               |
| 3           | Foreign body                                                                 | X              | X               |
| 4           | Pulmonary aspiration and foreign body in airway                              | X              | X               |
| 4           | Foreign body in eyes                                                         |                | X               |
| 4           | Foreign body in other body part                                              | X              | X               |
| 3           | Environmental heat and cold exposure                                         | X              | X               |
| 3           | Other unintentional injuries                                                 | X              | X               |
| 2           | Self-harm and interpersonal violence                                         | X              | X               |
| 3           | Self-harm                                                                    | X              | X               |
| 4           | Self-harm by firearm                                                         | X              | X               |
| 4           | Self-harm by other specified means                                           | X              | X               |
| 3           | Interpersonal violence                                                       | X              | X               |
| 4           | Assault by firearm                                                           | X              | X               |
| 4           | Assault by sharp object                                                      | X              | X               |
| 4           | Sexual violence                                                              |                | X               |
| 4           | Assault by other means                                                       | X              | X               |
| 2           | Forces of nature, conflict and terrorism, and executions and police conflict | X              | X               |
| 3           | Exposure to forces of nature                                                 | X              | X               |
| 3           | Conflict and terrorism                                                       | X              | X               |
| 3           | Executions and police conflict                                               | X              | X               |

Appendix Table 17. Underlying indicators for percent well-certified calculation, based on the maximum percent well certified data source in each 5-year time interval for 195 countries, 1980-2016

| Location            | Time Window | Stars | Percent Well-Certified (PWC) (%) | Max PWC Data Year | Max PWC Data Source                                            | Completeness (%) | Percent Major Garbage (%) | Verbal Autopsy Adjustment (None for 3B) (%) |
|---------------------|-------------|-------|----------------------------------|-------------------|----------------------------------------------------------------|------------------|---------------------------|---------------------------------------------|
| Afghanistan         | 1980-1984   | 0     |                                  |                   |                                                                |                  |                           |                                             |
| Afghanistan         | 1985-1989   | 0     |                                  |                   |                                                                |                  |                           |                                             |
| Afghanistan         | 1990-1994   | 0     |                                  |                   |                                                                |                  |                           |                                             |
| Afghanistan         | 1995-1999   | 0     |                                  |                   |                                                                |                  |                           |                                             |
| Afghanistan         | 2000-2004   | 1     | 4.6                              | 2001              | Afghanistan - Budgets Nutrition and Health Survey 2002         |                  | 27.8                      | 6.4                                         |
| Afghanistan         | 2005-2009   | 2     | 33.5                             | 2008              | Afghanistan Special Demographic and Health Survey 2010         |                  | 47.7                      | 64.0                                        |
| Afghanistan         | 2010-2016   | 0     |                                  |                   |                                                                |                  |                           |                                             |
| Albania             | 1980-1984   | 0     |                                  |                   |                                                                |                  |                           |                                             |
| Albania             | 1985-1989   | 4     | 65.9                             | 1989              | Vital Registration                                             | 100.0            | 34.1                      |                                             |
| Albania             | 1990-1994   | 4     | 67.0                             | 1993              | Vital Registration                                             | 97.7             | 31.4                      |                                             |
| Albania             | 1995-1999   | 4     | 71.3                             | 1997              | Vital Registration                                             | 95.4             | 25.3                      |                                             |
| Albania             | 2000-2004   | 4     | 65.8                             | 2003              | Vital Registration                                             | 91.8             | 28.4                      |                                             |
| Albania             | 2005-2009   | 3     | 56.8                             | 2008              | Vital Registration                                             | 76.8             | 26.1                      |                                             |
| Albania             | 2010-2016   | 3     | 45.0                             | 2010              | Vital Registration                                             | 56.8             | 20.8                      |                                             |
| Algeria             | 1980-1984   | 0     |                                  |                   |                                                                |                  |                           |                                             |
| Algeria             | 1985-1989   | 0     |                                  |                   |                                                                |                  |                           |                                             |
| Algeria             | 1990-1994   | 0     |                                  |                   |                                                                |                  |                           |                                             |
| Algeria             | 1995-1999   | 0     |                                  |                   |                                                                |                  |                           |                                             |
| Algeria             | 2000-2004   | 0     |                                  |                   |                                                                |                  |                           |                                             |
| Algeria             | 2005-2009   | 2     | 16.8                             | 2006              | Vital Registration                                             | 29.9             | 43.8                      |                                             |
| Algeria             | 2010-2016   | 0     |                                  |                   |                                                                |                  |                           |                                             |
| American Samoa      | 1980-1984   | 0     |                                  |                   |                                                                |                  |                           |                                             |
| American Samoa      | 1985-1989   | 0     |                                  |                   |                                                                |                  |                           |                                             |
| American Samoa      | 1990-1994   | 0     |                                  |                   |                                                                |                  |                           |                                             |
| American Samoa      | 1995-1999   | 4     | 78.6                             | 1997              | Vital Registration                                             | 100.0            | 21.4                      |                                             |
| American Samoa      | 2000-2004   | 4     | 81.0                             | 2002              | Vital Registration                                             | 100.0            | 19.0                      |                                             |
| American Samoa      | 2005-2009   | 4     | 83.7                             | 2009              | Vital Registration                                             | 100.0            | 16.3                      |                                             |
| American Samoa      | 2010-2016   | 4     | 71.0                             | 2011              | Vital Registration                                             | 90.4             | 21.4                      |                                             |
| Andorra             | 1980-1984   | 0     |                                  |                   |                                                                |                  |                           |                                             |
| Andorra             | 1985-1989   | 0     |                                  |                   |                                                                |                  |                           |                                             |
| Andorra             | 1990-1994   | 0     |                                  |                   |                                                                |                  |                           |                                             |
| Andorra             | 1995-1999   | 0     |                                  |                   |                                                                |                  |                           |                                             |
| Andorra             | 2000-2004   | 0     |                                  |                   |                                                                |                  |                           |                                             |
| Andorra             | 2005-2009   | 0     |                                  |                   |                                                                |                  |                           |                                             |
| Andorra             | 2010-2016   | 0     |                                  |                   |                                                                |                  |                           |                                             |
| Angola              | 1980-1984   | 0     |                                  |                   |                                                                |                  |                           |                                             |
| Angola              | 1985-1989   | 0     |                                  |                   |                                                                |                  |                           |                                             |
| Angola              | 1990-1994   | 0     |                                  |                   |                                                                |                  |                           |                                             |
| Angola              | 1995-1999   | 0     |                                  |                   |                                                                |                  |                           |                                             |
| Angola              | 2000-2004   | 0     |                                  |                   |                                                                |                  |                           |                                             |
| Angola              | 2005-2009   | 0     |                                  |                   |                                                                |                  |                           |                                             |
| Angola              | 2010-2016   | 1     | 4.3                              | 2010              | Angola - Dande Health and Demographic Surveillance System      |                  | 32.2                      | 6.4                                         |
| Antigua and Barbuda | 1980-1984   | 3     | 51.8                             | 1983              | Vital Registration                                             | 77.7             | 33.3                      |                                             |
| Antigua and Barbuda | 1985-1989   | 4     | 71.4                             | 1989              | Vital Registration                                             | 100.0            | 28.6                      |                                             |
| Antigua and Barbuda | 1990-1994   | 4     | 72.3                             | 1991              | Vital Registration                                             | 100.0            | 27.7                      |                                             |
| Antigua and Barbuda | 1995-1999   | 4     | 80.0                             | 1999              | Vital Registration                                             | 100.0            | 20.0                      |                                             |
| Antigua and Barbuda | 2000-2004   | 4     | 79.8                             | 2004              | Vital Registration                                             | 100.0            | 20.2                      |                                             |
| Antigua and Barbuda | 2005-2009   | 4     | 79.2                             | 2008              | Vital Registration                                             | 100.0            | 20.8                      |                                             |
| Antigua and Barbuda | 2010-2016   | 4     | 73.6                             | 2014              | Vital Registration                                             | 100.0            | 26.4                      |                                             |
| Argentina           | 1980-1984   | 4     | 76.5                             | 1981              | Vital Registration                                             | 100.0            | 23.5                      |                                             |
| Argentina           | 1985-1989   | 4     | 69.8                             | 1987              | Vital Registration                                             | 100.0            | 30.2                      |                                             |
| Argentina           | 1990-1994   | 4     | 68.5                             | 1990              | Vital Registration                                             | 100.0            | 31.5                      |                                             |
| Argentina           | 1995-1999   | 4     | 67.6                             | 1998              | Vital Registration                                             | 100.0            | 32.4                      |                                             |
| Argentina           | 2000-2004   | 4     | 66.7                             | 2003              | Vital Registration                                             | 100.0            | 33.3                      |                                             |
| Argentina           | 2005-2009   | 4     | 65.6                             | 2007              | Vital Registration                                             | 100.0            | 34.4                      |                                             |
| Argentina           | 2010-2016   | 4     | 67.8                             | 2014              | Vital Registration                                             | 99.1             | 31.6                      |                                             |
| Armenia             | 1980-1984   | 4     | 69.9                             | 1982              | Vital Registration                                             | 81.6             | 14.3                      |                                             |
| Armenia             | 1985-1989   | 4     | 76.4                             | 1987              | Vital Registration                                             | 88.4             | 13.6                      |                                             |
| Armenia             | 1990-1994   | 4     | 82.1                             | 1993              | Vital Registration                                             | 99.1             | 17.2                      |                                             |
| Armenia             | 1995-1999   | 4     | 81.8                             | 1999              | Vital Registration                                             | 93.2             | 12.2                      |                                             |
| Armenia             | 2000-2004   | 5     | 87.4                             | 2002              | Vital Registration                                             | 100.0            | 12.6                      |                                             |
| Armenia             | 2005-2009   | 5     | 90.8                             | 2008              | Vital Registration                                             | 99.3             | 8.6                       |                                             |
| Armenia             | 2010-2016   | 5     | 91.9                             | 2015              | Vital Registration                                             | 100.0            | 8.1                       |                                             |
| Australia           | 1980-1984   | 5     | 93.1                             | 1982              | Vital Registration                                             | 100.0            | 6.9                       |                                             |
| Australia           | 1985-1989   | 5     | 93.1                             | 1987              | Vital Registration                                             | 99.6             | 6.6                       |                                             |
| Australia           | 1990-1994   | 5     | 92.4                             | 1992              | Vital Registration                                             | 100.0            | 7.6                       |                                             |
| Australia           | 1995-1999   | 5     | 92.4                             | 1996              | Vital Registration                                             | 100.0            | 7.6                       |                                             |
| Australia           | 2000-2004   | 5     | 91.3                             | 2000              | Vital Registration                                             | 100.0            | 8.7                       |                                             |
| Australia           | 2005-2009   | 5     | 90.5                             | 2008              | Vital Registration                                             | 100.0            | 9.5                       |                                             |
| Australia           | 2010-2016   | 5     | 90.3                             | 2011              | Vital Registration                                             | 100.0            | 9.7                       |                                             |
| Austria             | 1980-1984   | 5     | 89.5                             | 1981              | Vital Registration                                             | 100.0            | 10.5                      |                                             |
| Austria             | 1985-1989   | 5     | 90.6                             | 1986              | Vital Registration                                             | 100.0            | 9.4                       |                                             |
| Austria             | 1990-1994   | 5     | 89.3                             | 1990              | Vital Registration                                             | 99.4             | 10.2                      |                                             |
| Austria             | 1995-1999   | 5     | 88.6                             | 1996              | Vital Registration                                             | 100.0            | 11.4                      |                                             |
| Austria             | 2000-2004   | 5     | 91.9                             | 2003              | Vital Registration                                             | 100.0            | 8.1                       |                                             |
| Austria             | 2005-2009   | 5     | 90.8                             | 2005              | Vital Registration                                             | 100.0            | 9.2                       |                                             |
| Austria             | 2010-2016   | 5     | 89.2                             | 2013              | Vital Registration                                             | 100.0            | 10.8                      |                                             |
| Azerbaijan          | 1980-1984   | 4     | 71.7                             | 1981              | Vital Registration                                             | 83.8             | 14.4                      |                                             |
| Azerbaijan          | 1985-1989   | 4     | 74.0                             | 1988              | Vital Registration                                             | 85.8             | 13.8                      |                                             |
| Azerbaijan          | 1990-1994   | 4     | 79.7                             | 1993              | Vital Registration                                             | 91.0             | 12.4                      |                                             |
| Azerbaijan          | 1995-1999   | 4     | 74.3                             | 1995              | Vital Registration                                             | 87.8             | 15.4                      |                                             |
| Azerbaijan          | 2000-2004   | 4     | 73.2                             | 2002              | Vital Registration                                             | 80.7             | 9.2                       |                                             |
| Azerbaijan          | 2005-2009   | 3     | 42.9                             | 2007              | Vital Registration                                             | 75.1             | 42.9                      |                                             |
| Azerbaijan          | 2010-2016   | 0     |                                  |                   |                                                                |                  |                           |                                             |
| Bahrain             | 1980-1984   | 0     |                                  |                   |                                                                |                  |                           |                                             |
| Bahrain             | 1985-1989   | 4     | 76.5                             | 1986              | Vital Registration                                             | 100.0            | 23.5                      |                                             |
| Bahrain             | 1990-1994   | 0     |                                  |                   |                                                                |                  |                           |                                             |
| Bahrain             | 1995-1999   | 3     | 62.2                             | 1998              | Vital Registration                                             | 100.0            | 37.8                      |                                             |
| Bahrain             | 2000-2004   | 3     | 55.0                             | 2000              | Vital Registration                                             | 85.8             | 36.0                      |                                             |
| Bahrain             | 2005-2009   | 3     | 51.8                             | 2005              | Vital Registration                                             | 85.2             | 39.2                      |                                             |
| Bahrain             | 2010-2016   | 3     | 63.8                             | 2014              | Vital Registration                                             | 100.0            | 36.2                      |                                             |
| Bangladesh          | 1980-1984   | 1     | 2.8                              | 1982              | Bangladesh - Matlab Health and Demographic Surveillance System |                  | 56.2                      | 6.4                                         |
| Bangladesh          | 1985-1989   | 1     | 4.4                              | 1989              | Bangladesh - Matlab Health and Demographic Surveillance System |                  | 30.5                      | 6.4                                         |
| Bangladesh          | 1990-1994   | 2     | 23.6                             | 1991              | Causes of childhood deaths in Bangladesh: an update            |                  | 16.3                      | 28.2                                        |
| Bangladesh          | 1995-1999   | 1     | 4.1                              | 1998              | Bangladesh - Matlab Health and Demographic Surveillance System |                  | 35.6                      | 6.4                                         |
| Bangladesh          | 2000-2004   | 2     | 10.2                             | 2004              | Bangladesh Demographic and Health Survey 2004                  |                  | 40.9                      | 17.2                                        |
| Bangladesh          | 2005-2009   | 1     | 6.3                              | 2009              | Verbal Autopsy                                                 |                  | 25.0                      | 8.4                                         |
| Bangladesh          | 2010-2016   | 3     | 38.6                             | 2014              | Verbal Autopsy                                                 |                  | 29.3                      | 54.6                                        |
| Barbados            | 1980-1984   | 4     | 72.6                             | 1980              | Vital Registration                                             | 98.6             | 26.4                      |                                             |
| Barbados            | 1985-1989   | 4     | 73.6                             | 1987              | Vital Registration                                             | 100.0            | 26.4                      |                                             |
| Barbados            | 1990-1994   | 4     | 72.5                             | 1992              | Vital Registration                                             | 100.0            | 27.5                      |                                             |
| Barbados            | 1995-1999   | 4     | 70.7                             | 1995              | Vital Registration                                             | 100.0            | 29.3                      |                                             |
| Barbados            | 2000-2004   | 4     | 75.8                             | 2000              | Vital Registration                                             | 100.0            | 24.2                      |                                             |
| Barbados            | 2005-2009   | 4     | 82.1                             | 2007              | Vital Registration                                             | 100.0            | 17.9                      |                                             |
| Barbados            | 2010-2016   | 4     | 81.4                             | 2011              | Vital Registration                                             | 100.0            | 18.6                      |                                             |
| Belarus             | 1980-1984   | 4     | 81.4                             | 1981              | Vital Registration                                             | 97.5             | 16.4                      |                                             |
| Belarus             | 1985-1989   | 5     | 86.6                             | 1987              | Vital Registration                                             | 99.7             | 13.1                      |                                             |
| Belarus             | 1990-1994   | 4     | 77.1                             | 1990              | Vital Registration                                             | 99.2             | 22.3                      |                                             |
| Belarus             | 1995-1999   | 4     | 79.9                             | 1999              | Vital Registration                                             | 100.0            | 20.1                      |                                             |
| Belarus             | 2000-2004   | 4     | 83.0                             | 2002              | Vital Registration                                             | 100.0            | 17.0                      |                                             |
| Belarus             | 2005-2009   | 4     | 82.7                             | 2009              | Vital Registration                                             | 99.6             | 17.9                      |                                             |
| Belarus             | 2010-2016   | 4     | 82.6                             | 2010              | Vital Registration                                             | 100.0            | 17.4                      |                                             |
| Belgium             | 1980-1984   | 4     | 77.0                             | 1981              | Vital Registration                                             | 99.0             | 22.2                      |                                             |
| Belgium             | 1985-1989   | 4     | 77.2                             | 1987              | Vital Registration                                             | 99.6             | 22.4                      |                                             |
| Belgium             | 1990-1994   | 4     | 81.1                             | 1993              | Vital Registration                                             | 100.0            | 18.9                      |                                             |
| Belgium             | 1995-1999   | 4     | 84.1                             | 1998              | Vital Registration                                             | 100.0            | 15.9                      |                                             |
| Belgium             | 2000-2004   | 4     | 83.1                             | 2000              | Vital Registration                                             | 100.0            | 16.9                      |                                             |
| Belgium             | 2005-2009   | 4     | 83.0                             | 2008              | Vital Registration                                             | 100.0            | 17.0                      |                                             |
| Belgium             | 2010-2016   | 4     | 80.2                             | 2010              | Vital Registration                                             | 99.8             | 19.6                      |                                             |
| Belize              | 1980-1984   | 3     | 54.0                             | 1980              | Vital Registration                                             | 81.3             | 33.6                      |                                             |

Appendix Table 17. Underlying indicators for percent well-certified for data source with maximum percent well certified in each 5-year time interval for 195 countries, 1980-2016.

| Location               | Time Window | Stars | Percent Well-Certified (PWC) (%) | Max PWC Data Year | Max PWC Data Source                                                                                                                                                               | Completeness (%) | Percent Major Garbage (%) | Verbal Autopsy Adjustment (None for VR) (%) |
|------------------------|-------------|-------|----------------------------------|-------------------|-----------------------------------------------------------------------------------------------------------------------------------------------------------------------------------|------------------|---------------------------|---------------------------------------------|
| Belize                 | 1985-1989   | 3     | 56.9                             | 1987              | Vital Registration                                                                                                                                                                | 76.2             | 25.3                      |                                             |
| Belize                 | 1990-1994   | 3     | 46.8                             | 1993              | Vital Registration                                                                                                                                                                | 74.9             | 37.5                      |                                             |
| Belize                 | 1995-1999   | 4     | 76.9                             | 1998              | Vital Registration                                                                                                                                                                | 100.0            | 23.1                      |                                             |
| Belize                 | 2000-2004   | 4     | 71.6                             | 2000              | Vital Registration                                                                                                                                                                | 100.0            | 28.4                      |                                             |
| Belize                 | 2005-2009   | 4     | 80.7                             | 2009              | Vital Registration                                                                                                                                                                | 93.0             | 13.2                      |                                             |
| Belize                 | 2010-2016   | 4     | 84.7                             | 2011              | Vital Registration                                                                                                                                                                | 94.7             | 10.6                      |                                             |
| Benin                  | 1980-1984   | 0     |                                  |                   |                                                                                                                                                                                   |                  |                           |                                             |
| Benin                  | 1985-1989   | 1     | 0.6                              | 1989              | Incidence de décès de 0 à 1 an dans une cohorte de 802 enfants en milieu rural au sud du Bénin                                                                                    |                  | 72.0                      | 2.1                                         |
| Benin                  | 1990-1994   | 0     |                                  |                   |                                                                                                                                                                                   |                  |                           |                                             |
| Benin                  | 1995-1999   | 0     |                                  |                   |                                                                                                                                                                                   |                  |                           |                                             |
| Benin                  | 2000-2004   | 0     |                                  |                   |                                                                                                                                                                                   |                  |                           |                                             |
| Benin                  | 2005-2009   | 0     |                                  |                   |                                                                                                                                                                                   |                  |                           |                                             |
| Benin                  | 2010-2016   | 0     |                                  |                   |                                                                                                                                                                                   |                  |                           |                                             |
| Bermuda                | 1980-1984   | 5     | 89.0                             | 1984              | Vital Registration                                                                                                                                                                | 100.0            | 11.0                      |                                             |
| Bermuda                | 1985-1989   | 5     | 86.5                             | 1987              | Vital Registration                                                                                                                                                                | 94.6             | 8.5                       |                                             |
| Bermuda                | 1990-1994   | 4     | 84.7                             | 1991              | Vital Registration                                                                                                                                                                | 100.0            | 15.3                      |                                             |
| Bermuda                | 1995-1999   | 5     | 90.9                             | 1998              | Vital Registration                                                                                                                                                                | 100.0            | 9.1                       |                                             |
| Bermuda                | 2000-2004   | 5     | 89.4                             | 2000              | Vital Registration                                                                                                                                                                | 100.0            | 10.6                      |                                             |
| Bermuda                | 2005-2009   | 5     | 86.4                             | 2005              | Vital Registration                                                                                                                                                                | 100.0            | 13.6                      |                                             |
| Bermuda                | 2010-2016   | 5     | 90.5                             | 2014              | Vital Registration                                                                                                                                                                | 100.0            | 9.5                       |                                             |
| Bhutan                 | 1980-1984   | 0     |                                  |                   |                                                                                                                                                                                   |                  |                           |                                             |
| Bhutan                 | 1985-1989   | 0     |                                  |                   |                                                                                                                                                                                   |                  |                           |                                             |
| Bhutan                 | 1990-1994   | 0     |                                  |                   |                                                                                                                                                                                   |                  |                           |                                             |
| Bhutan                 | 1995-1999   | 0     |                                  |                   |                                                                                                                                                                                   |                  |                           |                                             |
| Bhutan                 | 2000-2004   | 0     |                                  |                   |                                                                                                                                                                                   |                  |                           |                                             |
| Bhutan                 | 2005-2009   | 0     |                                  |                   |                                                                                                                                                                                   |                  |                           |                                             |
| Bhutan                 | 2010-2016   | 0     |                                  |                   |                                                                                                                                                                                   |                  |                           |                                             |
| Bolivia                | 1980-1984   | 0     |                                  |                   |                                                                                                                                                                                   |                  |                           |                                             |
| Bolivia                | 1985-1989   | 0     |                                  |                   |                                                                                                                                                                                   |                  |                           |                                             |
| Bolivia                | 1990-1994   | 0     |                                  |                   |                                                                                                                                                                                   |                  |                           |                                             |
| Bolivia                | 1995-1999   | 0     |                                  |                   |                                                                                                                                                                                   |                  |                           |                                             |
| Bolivia                | 2000-2004   | 2     | 12.4                             | 2003              | Vital Registration                                                                                                                                                                | 37.8             | 67.3                      |                                             |
| Bolivia                | 2005-2009   | 0     |                                  |                   |                                                                                                                                                                                   |                  |                           |                                             |
| Bolivia                | 2010-2016   | 0     |                                  |                   |                                                                                                                                                                                   |                  |                           |                                             |
| Bosnia and Herzegovina | 1980-1984   | 0     |                                  |                   |                                                                                                                                                                                   |                  |                           |                                             |
| Bosnia and Herzegovina | 1985-1989   | 3     | 64.4                             | 1989              | Vital Registration                                                                                                                                                                | 94.8             | 32.0                      |                                             |
| Bosnia and Herzegovina | 1990-1994   | 3     | 64.5                             | 1991              | Vital Registration                                                                                                                                                                | 93.5             | 31.0                      |                                             |
| Bosnia and Herzegovina | 1995-1999   | 0     |                                  |                   |                                                                                                                                                                                   |                  |                           |                                             |
| Bosnia and Herzegovina | 2000-2004   | 0     |                                  |                   |                                                                                                                                                                                   |                  |                           |                                             |
| Bosnia and Herzegovina | 2005-2009   | 0     |                                  |                   |                                                                                                                                                                                   |                  |                           |                                             |
| Bosnia and Herzegovina | 2010-2016   | 4     | 68.8                             | 2014              | Vital Registration                                                                                                                                                                | 95.6             | 28.0                      |                                             |
| Botswana               | 1980-1984   | 0     |                                  |                   |                                                                                                                                                                                   |                  |                           |                                             |
| Botswana               | 1985-1989   | 0     |                                  |                   |                                                                                                                                                                                   |                  |                           |                                             |
| Botswana               | 1990-1994   | 0     |                                  |                   |                                                                                                                                                                                   |                  |                           |                                             |
| Botswana               | 1995-1999   | 0     |                                  |                   |                                                                                                                                                                                   |                  |                           |                                             |
| Botswana               | 2000-2004   | 0     |                                  |                   |                                                                                                                                                                                   |                  |                           |                                             |
| Botswana               | 2005-2009   | 0     |                                  |                   |                                                                                                                                                                                   |                  |                           |                                             |
| Botswana               | 2010-2016   | 0     |                                  |                   |                                                                                                                                                                                   |                  |                           |                                             |
| Brazil                 | 1980-1984   | 3     | 58.3                             | 1984              | Vital Registration                                                                                                                                                                | 90.9             | 35.9                      |                                             |
| Brazil                 | 1985-1989   | 3     | 62.4                             | 1988              | Vital Registration                                                                                                                                                                | 94.3             | 33.8                      |                                             |
| Brazil                 | 1990-1994   | 3     | 65.0                             | 1994              | Vital Registration                                                                                                                                                                | 95.7             | 32.1                      |                                             |
| Brazil                 | 1995-1999   | 4     | 69.8                             | 1999              | Vital Registration                                                                                                                                                                | 96.5             | 27.6                      |                                             |
| Brazil                 | 2000-2004   | 4     | 75.0                             | 2004              | Vital Registration                                                                                                                                                                | 98.8             | 24.1                      |                                             |
| Brazil                 | 2005-2009   | 4     | 80.4                             | 2009              | Vital Registration                                                                                                                                                                | 99.1             | 18.8                      |                                             |
| Brazil                 | 2010-2016   | 4     | 82.7                             | 2014              | Vital Registration                                                                                                                                                                | 100.0            | 17.3                      |                                             |
| Brunei                 | 1980-1984   | 0     |                                  |                   |                                                                                                                                                                                   |                  |                           |                                             |
| Brunei                 | 1985-1989   | 0     |                                  |                   |                                                                                                                                                                                   |                  |                           |                                             |
| Brunei                 | 1990-1994   | 0     |                                  |                   |                                                                                                                                                                                   |                  |                           |                                             |
| Brunei                 | 1995-1999   | 5     | 85.4                             | 1998              | Vital Registration                                                                                                                                                                | 99.6             | 14.2                      |                                             |
| Brunei                 | 2000-2004   | 4     | 82.9                             | 2002              | Vital Registration                                                                                                                                                                | 100.0            | 17.1                      |                                             |
| Brunei                 | 2005-2009   | 4     | 81.9                             | 2007              | Vital Registration                                                                                                                                                                | 100.0            | 18.1                      |                                             |
| Brunei                 | 2010-2016   | 4     | 81.8                             | 2013              | Vital Registration                                                                                                                                                                | 95.8             | 14.6                      |                                             |
| Bulgaria               | 1980-1984   | 4     | 80.4                             | 1980              | Vital Registration                                                                                                                                                                | 100.0            | 19.6                      |                                             |
| Bulgaria               | 1985-1989   | 4     | 80.7                             | 1985              | Vital Registration                                                                                                                                                                | 100.0            | 19.3                      |                                             |
| Bulgaria               | 1990-1994   | 4     | 79.7                             | 1993              | Vital Registration                                                                                                                                                                | 99.5             | 19.9                      |                                             |
| Bulgaria               | 1995-1999   | 4     | 76.0                             | 1995              | Vital Registration                                                                                                                                                                | 99.2             | 23.3                      |                                             |
| Bulgaria               | 2000-2004   | 4     | 71.8                             | 2002              | Vital Registration                                                                                                                                                                | 100.0            | 28.2                      |                                             |
| Bulgaria               | 2005-2009   | 4     | 73.5                             | 2005              | Vital Registration                                                                                                                                                                | 100.0            | 26.4                      |                                             |
| Bulgaria               | 2010-2016   | 4     | 70.3                             | 2012              | Vital Registration                                                                                                                                                                | 100.0            | 29.7                      |                                             |
| Burkina Faso           | 1980-1984   | 1     | 0.2                              | 1984              | The burden of malaria mortality among African children in the year 2000                                                                                                           |                  | 95.3                      | 4.1                                         |
| Burkina Faso           | 1985-1989   | 0     |                                  |                   |                                                                                                                                                                                   |                  |                           |                                             |
| Burkina Faso           | 1990-1994   | 0     |                                  |                   |                                                                                                                                                                                   |                  |                           |                                             |
| Burkina Faso           | 1995-1999   | 1     | 4.6                              | 1998              | Measuring the local burden of disease. A study of years of life lost in sub-Saharan Africa                                                                                        |                  | 28.0                      | 6.4                                         |
| Burkina Faso           | 2000-2004   | 1     | 5.6                              | 2000              | Burkina Faso - Nouma Health and Demographic Surveillance System                                                                                                                   |                  | 12.7                      | 6.4                                         |
| Burkina Faso           | 2005-2009   | 1     | 4.6                              | 2009              | An improved method for physician-certified verbal autopsy reduces the rate of discrepancy: experiences in the Nouma Health and Demographic Surveillance Site (NHDS), Burkina Faso |                  | 28.8                      | 6.4                                         |
| Burkina Faso           | 2010-2016   | 1     | 0.3                              | 2010              | Africa, Asia, Oceania - INDEPTH Network Cause-Specific Mortality - Release 2014                                                                                                   |                  | 95.4                      | 6.4                                         |
| Burundi                | 1980-1984   | 0     |                                  |                   |                                                                                                                                                                                   |                  |                           |                                             |
| Burundi                | 1985-1989   | 0     |                                  |                   |                                                                                                                                                                                   |                  |                           |                                             |
| Burundi                | 1990-1994   | 1     | 2.3                              | 1990              | Mortality and morbidity at young ages in a stable hyperendemic malaria region, community Nyanza-Lac, Imbo South, Burundi                                                          |                  | 23.1                      | 3.0                                         |
| Burundi                | 1995-1999   | 0     |                                  |                   |                                                                                                                                                                                   |                  |                           |                                             |
| Burundi                | 2000-2004   | 0     |                                  |                   |                                                                                                                                                                                   |                  |                           |                                             |
| Burundi                | 2005-2009   | 0     |                                  |                   |                                                                                                                                                                                   |                  |                           |                                             |
| Burundi                | 2010-2016   | 0     |                                  |                   |                                                                                                                                                                                   |                  |                           |                                             |
| Cambodia               | 1980-1984   | 0     |                                  |                   |                                                                                                                                                                                   |                  |                           |                                             |
| Cambodia               | 1985-1989   | 0     |                                  |                   |                                                                                                                                                                                   |                  |                           |                                             |
| Cambodia               | 1990-1994   | 0     |                                  |                   |                                                                                                                                                                                   |                  |                           |                                             |
| Cambodia               | 1995-1999   | 0     |                                  |                   |                                                                                                                                                                                   |                  |                           |                                             |
| Cambodia               | 2000-2004   | 1     | 1.6                              | 2001              | Community-based surveillance: a pilot study from rural Cambodia                                                                                                                   |                  | 74.8                      | 6.4                                         |
| Cambodia               | 2005-2009   | 1     | 3.5                              | 2009              | Mortality in Cambodia An 18-Month Prospective Community-based Surveillance of All-age Deaths Using Verbal Autopsies                                                               |                  | 46.1                      | 6.4                                         |
| Cambodia               | 2010-2016   | 0     |                                  |                   |                                                                                                                                                                                   |                  |                           |                                             |
| Cameroon               | 1980-1984   | 0     |                                  |                   |                                                                                                                                                                                   |                  |                           |                                             |
| Cameroon               | 1985-1989   | 0     |                                  |                   |                                                                                                                                                                                   |                  |                           |                                             |
| Cameroon               | 1990-1994   | 0     |                                  |                   |                                                                                                                                                                                   |                  |                           |                                             |
| Cameroon               | 1995-1999   | 0     |                                  |                   |                                                                                                                                                                                   |                  |                           |                                             |
| Cameroon               | 2000-2004   | 0     |                                  |                   |                                                                                                                                                                                   |                  |                           |                                             |
| Cameroon               | 2005-2009   | 0     |                                  |                   |                                                                                                                                                                                   |                  |                           |                                             |
| Cameroon               | 2010-2016   | 0     |                                  |                   |                                                                                                                                                                                   |                  |                           |                                             |
| Canada                 | 1980-1984   | 5     | 88.6                             | 1980              | Vital Registration                                                                                                                                                                | 100.0            | 11.4                      |                                             |
| Canada                 | 1985-1989   | 5     | 89.8                             | 1986              | Vital Registration                                                                                                                                                                | 100.0            | 10.2                      |                                             |
| Canada                 | 1990-1994   | 5     | 88.3                             | 1993              | Vital Registration                                                                                                                                                                | 100.0            | 11.7                      |                                             |
| Canada                 | 1995-1999   | 5     | 88.2                             | 1999              | Vital Registration                                                                                                                                                                | 100.0            | 11.8                      |                                             |
| Canada                 | 2000-2004   | 5     | 89.6                             | 2001              | Vital Registration                                                                                                                                                                | 100.0            | 10.4                      |                                             |
| Canada                 | 2005-2009   | 5     | 90.1                             | 2009              | Vital Registration                                                                                                                                                                | 100.0            | 9.9                       |                                             |
| Canada                 | 2010-2016   | 5     | 90.1                             | 2012              | Vital Registration                                                                                                                                                                | 100.0            | 9.9                       |                                             |
| Cape Verde             | 1980-1984   | 3     | 58.3                             | 1980              | Vital Registration                                                                                                                                                                | 100.0            | 41.7                      |                                             |
| Cape Verde             | 1985-1989   | 0     |                                  |                   |                                                                                                                                                                                   |                  |                           |                                             |
| Cape Verde             | 1990-1994   | 1     | 0.1                              | 1992              | Deaths among women of reproductive age in Cape Verde: causes and avoidability                                                                                                     |                  | 57.7                      | 0.3                                         |
| Cape Verde             | 1995-1999   | 0     |                                  |                   |                                                                                                                                                                                   |                  |                           |                                             |
| Cape Verde             | 2000-2004   | 0     |                                  |                   |                                                                                                                                                                                   |                  |                           |                                             |

Appendix Table 17. Underlying indicators for percent well-certified for data source with maximum percent well certified in each 5-year time interval for 195 countries, 1980-2016.

| Location                         | Time Window | Stars | Percent Well-Certified (PWC) (%) | Max PWC Data Year | Max PWC Data Source                                                                                                                                        | Completeness (%) | Percent Major Garbage (%) | Verbal Autopsy Adjustment (None for VR) (%) |
|----------------------------------|-------------|-------|----------------------------------|-------------------|------------------------------------------------------------------------------------------------------------------------------------------------------------|------------------|---------------------------|---------------------------------------------|
| Cape Verde                       | 2005-2009   | 0     |                                  |                   |                                                                                                                                                            |                  |                           |                                             |
| Cape Verde                       | 2010-2016   | 4     | 69.7                             | 2012              | Vital Registration                                                                                                                                         | 98.5             | 29.3                      |                                             |
| Central African Republic         | 1980-1984   | 0     |                                  |                   |                                                                                                                                                            |                  |                           |                                             |
| Central African Republic         | 1985-1989   | 0     |                                  |                   |                                                                                                                                                            |                  |                           |                                             |
| Central African Republic         | 1990-1994   | 0     |                                  |                   |                                                                                                                                                            |                  |                           |                                             |
| Central African Republic         | 1995-1999   | 0     |                                  |                   |                                                                                                                                                            |                  |                           |                                             |
| Central African Republic         | 2000-2004   | 0     |                                  |                   |                                                                                                                                                            |                  |                           |                                             |
| Central African Republic         | 2005-2009   | 0     |                                  |                   |                                                                                                                                                            |                  |                           |                                             |
| Central African Republic         | 2010-2016   | 0     |                                  |                   |                                                                                                                                                            |                  |                           |                                             |
| Chad                             | 1980-1984   | 0     |                                  |                   |                                                                                                                                                            |                  |                           |                                             |
| Chad                             | 1985-1989   | 0     |                                  |                   |                                                                                                                                                            |                  |                           |                                             |
| Chad                             | 1990-1994   | 0     |                                  |                   |                                                                                                                                                            |                  |                           |                                             |
| Chad                             | 1995-1999   | 0     |                                  |                   |                                                                                                                                                            |                  |                           |                                             |
| Chad                             | 2000-2004   | 0     |                                  |                   |                                                                                                                                                            |                  |                           |                                             |
| Chad                             | 2005-2009   | 0     |                                  |                   |                                                                                                                                                            |                  |                           |                                             |
| Chad                             | 2010-2016   | 0     |                                  |                   |                                                                                                                                                            |                  |                           |                                             |
| Chile                            | 1980-1984   | 4     | 75.5                             | 1983              | Vital Registration                                                                                                                                         | 100.0            | 24.5                      |                                             |
| Chile                            | 1985-1989   | 4     | 75.1                             | 1988              | Vital Registration                                                                                                                                         | 100.0            | 24.9                      |                                             |
| Chile                            | 1990-1994   | 4     | 76.6                             | 1994              | Vital Registration                                                                                                                                         | 97.6             | 21.5                      |                                             |
| Chile                            | 1995-1999   | 4     | 84.8                             | 1999              | Vital Registration                                                                                                                                         | 100.0            | 15.2                      |                                             |
| Chile                            | 2000-2004   | 5     | 90.9                             | 2004              | Vital Registration                                                                                                                                         | 100.0            | 9.1                       |                                             |
| Chile                            | 2005-2009   | 5     | 90.3                             | 2007              | Vital Registration                                                                                                                                         | 100.0            | 9.7                       |                                             |
| Chile                            | 2010-2016   | 5     | 90.0                             | 2012              | Vital Registration                                                                                                                                         | 100.0            | 10.0                      |                                             |
| China                            | 1980-1984   | 0     |                                  |                   |                                                                                                                                                            |                  |                           |                                             |
| China                            | 1985-1989   | 0     |                                  |                   |                                                                                                                                                            |                  |                           |                                             |
| China                            | 1990-1994   | 4     | 71.7                             | 1994              | Vital Registration - Sample                                                                                                                                | 82.8             | 13.4                      |                                             |
| China                            | 1995-1999   | 4     | 76.5                             | 1996              | Vital Registration - Sample                                                                                                                                | 82.8             | 14.8                      |                                             |
| China                            | 2000-2004   | 4     | 73.0                             | 2004              | Vital Registration                                                                                                                                         | 77.0             | 5.2                       |                                             |
| China                            | 2005-2009   | 4     | 72.6                             | 2005              | Vital Registration                                                                                                                                         | 76.5             | 5.1                       |                                             |
| China                            | 2010-2016   | 4     | 69.3                             | 2011              | Vital Registration - Sample                                                                                                                                | 73.5             | 5.8                       |                                             |
| Colombia                         | 1980-1984   | 4     | 71.7                             | 1983              | Vital Registration                                                                                                                                         | 91.2             | 21.5                      |                                             |
| Colombia                         | 1985-1989   | 4     | 73.3                             | 1985              | Vital Registration                                                                                                                                         | 92.8             | 21.0                      |                                             |
| Colombia                         | 1990-1994   | 4     | 75.3                             | 1993              | Vital Registration                                                                                                                                         | 89.7             | 16.1                      |                                             |
| Colombia                         | 1995-1999   | 4     | 84.5                             | 1999              | Vital Registration                                                                                                                                         | 94.7             | 10.8                      |                                             |
| Colombia                         | 2000-2004   | 5     | 86.0                             | 2003              | Vital Registration                                                                                                                                         | 95.8             | 10.2                      |                                             |
| Colombia                         | 2005-2009   | 5     | 86.3                             | 2008              | Vital Registration                                                                                                                                         | 96.6             | 10.7                      |                                             |
| Colombia                         | 2010-2016   | 5     | 87.8                             | 2013              | Vital Registration                                                                                                                                         | 97.8             | 10.2                      |                                             |
| Comoros                          | 1980-1984   | 0     |                                  |                   |                                                                                                                                                            |                  |                           |                                             |
| Comoros                          | 1985-1989   | 0     |                                  |                   |                                                                                                                                                            |                  |                           |                                             |
| Comoros                          | 1990-1994   | 0     |                                  |                   |                                                                                                                                                            |                  |                           |                                             |
| Comoros                          | 1995-1999   | 0     |                                  |                   |                                                                                                                                                            |                  |                           |                                             |
| Comoros                          | 2000-2004   | 0     |                                  |                   |                                                                                                                                                            |                  |                           |                                             |
| Comoros                          | 2005-2009   | 0     |                                  |                   |                                                                                                                                                            |                  |                           |                                             |
| Comoros                          | 2010-2016   | 0     |                                  |                   |                                                                                                                                                            |                  |                           |                                             |
| Congo (Brazzaville)              | 1980-1984   | 0     |                                  |                   |                                                                                                                                                            |                  |                           |                                             |
| Congo (Brazzaville)              | 1985-1989   | 0     |                                  |                   |                                                                                                                                                            |                  |                           |                                             |
| Congo (Brazzaville)              | 1990-1994   | 0     |                                  |                   |                                                                                                                                                            |                  |                           |                                             |
| Congo (Brazzaville)              | 1995-1999   | 0     |                                  |                   |                                                                                                                                                            |                  |                           |                                             |
| Congo (Brazzaville)              | 2000-2004   | 0     |                                  |                   |                                                                                                                                                            |                  |                           |                                             |
| Congo (Brazzaville)              | 2005-2009   | 0     |                                  |                   |                                                                                                                                                            |                  |                           |                                             |
| Congo (Brazzaville)              | 2010-2016   | 0     |                                  |                   |                                                                                                                                                            |                  |                           |                                             |
| Costa Rica                       | 1980-1984   | 4     | 79.8                             | 1984              | Vital Registration                                                                                                                                         | 97.7             | 18.3                      |                                             |
| Costa Rica                       | 1985-1989   | 4     | 81.8                             | 1985              | Vital Registration                                                                                                                                         | 100.0            | 18.2                      |                                             |
| Costa Rica                       | 1990-1994   | 4     | 80.2                             | 1994              | Vital Registration                                                                                                                                         | 100.0            | 19.8                      |                                             |
| Costa Rica                       | 1995-1999   | 5     | 91.2                             | 1999              | Vital Registration                                                                                                                                         | 100.0            | 8.8                       |                                             |
| Costa Rica                       | 2000-2004   | 5     | 91.8                             | 2003              | Vital Registration                                                                                                                                         | 99.4             | 7.6                       |                                             |
| Costa Rica                       | 2005-2009   | 5     | 90.8                             | 2006              | Vital Registration                                                                                                                                         | 100.0            | 10.2                      |                                             |
| Costa Rica                       | 2010-2016   | 5     | 90.8                             | 2014              | Vital Registration                                                                                                                                         | 100.0            | 9.2                       |                                             |
| Cote d'Ivoire                    | 1980-1984   | 0     |                                  |                   |                                                                                                                                                            |                  |                           |                                             |
| Cote d'Ivoire                    | 1985-1989   | 1     | 1.0                              | 1988              | Effet de l'observance des d'approvisionnement en eau et de la therapie par voie orale sur les diarrhees chez les enfants de moins de 5 de la Cote d'Ivoire |                  | 68.0                      | 3.3                                         |
| Cote d'Ivoire                    | 1990-1994   | 1     | 1.0                              | 1992              | Effet de l'observance des d'approvisionnement en eau et de la therapie par voie orale sur les diarrhees chez les enfants de moins de 5 de la Cote d'Ivoire |                  | 65.9                      | 3.0                                         |
| Cote d'Ivoire                    | 1995-1999   | 0     |                                  |                   |                                                                                                                                                            |                  |                           |                                             |
| Cote d'Ivoire                    | 2000-2004   | 0     |                                  |                   |                                                                                                                                                            |                  |                           |                                             |
| Cote d'Ivoire                    | 2005-2009   | 1     | 0.2                              | 2009              | Africa, Asia, Oceania - INDEPTH Network Cause-Specific Mortality - Release 2014                                                                            |                  | 97.1                      | 6.4                                         |
| Cote d'Ivoire                    | 2010-2016   | 1     | 0.2                              | 2011              | Africa, Asia, Oceania - INDEPTH Network Cause-Specific Mortality - Release 2014                                                                            |                  | 96.8                      | 6.4                                         |
| Croatia                          | 1980-1984   | 0     |                                  |                   |                                                                                                                                                            |                  |                           |                                             |
| Croatia                          | 1985-1989   | 4     | 82.7                             | 1989              | Vital Registration                                                                                                                                         | 98.2             | 15.7                      |                                             |
| Croatia                          | 1990-1994   | 4     | 83.7                             | 1990              | Vital Registration                                                                                                                                         | 98.4             | 14.9                      |                                             |
| Croatia                          | 1995-1999   | 4     | 80.7                             | 1999              | Vital Registration                                                                                                                                         | 97.7             | 17.5                      |                                             |
| Croatia                          | 2000-2004   | 4     | 84.1                             | 2003              | Vital Registration                                                                                                                                         | 100.0            | 15.9                      |                                             |
| Croatia                          | 2005-2009   | 5     | 86.5                             | 2009              | Vital Registration                                                                                                                                         | 98.0             | 11.7                      |                                             |
| Croatia                          | 2010-2016   | 5     | 87.9                             | 2010              | Vital Registration                                                                                                                                         | 97.2             | 9.5                       |                                             |
| Cuba                             | 1980-1984   | 4     | 84.6                             | 1981              | Vital Registration                                                                                                                                         | 100.0            | 15.4                      |                                             |
| Cuba                             | 1985-1989   | 4     | 84.6                             | 1985              | Vital Registration                                                                                                                                         | 99.7             | 15.2                      |                                             |
| Cuba                             | 1990-1994   | 4     | 83.2                             | 1990              | Vital Registration                                                                                                                                         | 98.0             | 15.0                      |                                             |
| Cuba                             | 1995-1999   | 5     | 88.3                             | 1999              | Vital Registration                                                                                                                                         | 100.0            | 11.7                      |                                             |
| Cuba                             | 2000-2004   | 5     | 90.1                             | 2004              | Vital Registration                                                                                                                                         | 100.0            | 9.9                       |                                             |
| Cuba                             | 2005-2009   | 5     | 91.0                             | 2009              | Vital Registration                                                                                                                                         | 100.0            | 9.0                       |                                             |
| Cuba                             | 2010-2016   | 5     | 91.5                             | 2012              | Vital Registration                                                                                                                                         | 100.0            | 8.5                       |                                             |
| Cyprus                           | 1980-1984   | 0     |                                  |                   |                                                                                                                                                            |                  |                           |                                             |
| Cyprus                           | 1985-1989   | 0     |                                  |                   |                                                                                                                                                            |                  |                           |                                             |
| Cyprus                           | 1990-1994   | 0     |                                  |                   |                                                                                                                                                            |                  |                           |                                             |
| Cyprus                           | 1995-1999   | 2     | 28.7                             | 1999              | Vital Registration                                                                                                                                         | 81.9             | 65.0                      |                                             |
| Cyprus                           | 2000-2004   | 3     | 58.3                             | 2004              | Vital Registration                                                                                                                                         | 83.8             | 30.5                      |                                             |
| Cyprus                           | 2005-2009   | 4     | 66.7                             | 2007              | Vital Registration                                                                                                                                         | 86.5             | 22.8                      |                                             |
| Cyprus                           | 2010-2016   | 4     | 66.5                             | 2014              | Vital Registration                                                                                                                                         | 81.0             | 17.9                      |                                             |
| Czech Republic                   | 1980-1984   | 0     |                                  |                   |                                                                                                                                                            |                  |                           |                                             |
| Czech Republic                   | 1985-1989   | 5     | 90.3                             | 1986              | Vital Registration                                                                                                                                         | 100.0            | 9.7                       |                                             |
| Czech Republic                   | 1990-1994   | 5     | 89.4                             | 1990              | Vital Registration                                                                                                                                         | 100.0            | 10.6                      |                                             |
| Czech Republic                   | 1995-1999   | 4     | 84.8                             | 1995              | Vital Registration                                                                                                                                         | 100.0            | 15.2                      |                                             |
| Czech Republic                   | 2000-2004   | 5     | 85.1                             | 2000              | Vital Registration                                                                                                                                         | 100.0            | 14.9                      |                                             |
| Czech Republic                   | 2005-2009   | 4     | 84.8                             | 2007              | Vital Registration                                                                                                                                         | 98.7             | 14.2                      |                                             |
| Czech Republic                   | 2010-2016   | 5     | 87.8                             | 2013              | Vital Registration                                                                                                                                         | 100.0            | 12.2                      |                                             |
| Democratic Republic of the Congo | 1980-1984   | 0     |                                  |                   |                                                                                                                                                            |                  |                           |                                             |
| Democratic Republic of the Congo | 1985-1989   | 1     | 2.3                              | 1986              | Etude de la mortalité globale et de la mortalité liée au paludisme dans le Kivu montagneux, Zaire                                                          |                  | 64.3                      | 6.4                                         |
| Democratic Republic of the Congo | 1990-1994   | 1     | 2.9                              | 1990              | Influence of nutritional status on child mortality in rural Zaire                                                                                          |                  | 14.2                      | 3.4                                         |
| Democratic Republic of the Congo | 1995-1999   | 0     |                                  |                   |                                                                                                                                                            |                  |                           |                                             |
| Democratic Republic of the Congo | 2000-2004   | 0     |                                  |                   |                                                                                                                                                            |                  |                           |                                             |
| Democratic Republic of the Congo | 2005-2009   | 0     |                                  |                   |                                                                                                                                                            |                  |                           |                                             |
| Democratic Republic of the Congo | 2010-2016   | 0     |                                  |                   |                                                                                                                                                            |                  |                           |                                             |
| Denmark                          | 1980-1984   | 4     | 80.6                             | 1980              | Vital Registration                                                                                                                                         | 100.0            | 19.4                      |                                             |
| Denmark                          | 1985-1989   | 4     | 78.8                             | 1985              | Vital Registration                                                                                                                                         | 100.0            | 21.2                      |                                             |
| Denmark                          | 1990-1994   | 4     | 84.0                             | 1994              | Vital Registration                                                                                                                                         | 100.0            | 16.0                      |                                             |
| Denmark                          | 1995-1999   | 5     | 86.7                             | 1999              | Vital Registration                                                                                                                                         | 100.0            | 13.2                      |                                             |
| Denmark                          | 2000-2004   | 5     | 85.3                             | 2001              | Vital Registration                                                                                                                                         | 100.0            | 14.7                      |                                             |
| Denmark                          | 2005-2009   | 4     | 84.1                             | 2006              | Vital Registration                                                                                                                                         | 100.0            | 15.9                      |                                             |
| Denmark                          | 2010-2016   | 4     | 84.6                             | 2012              | Vital Registration                                                                                                                                         | 100.0            | 15.4                      |                                             |
| Djibouti                         | 1980-1984   | 0     |                                  |                   |                                                                                                                                                            |                  |                           |                                             |
| Djibouti                         | 1985-1989   | 0     |                                  |                   |                                                                                                                                                            |                  |                           |                                             |
| Djibouti                         | 1990-1994   | 0     |                                  |                   |                                                                                                                                                            |                  |                           |                                             |
| Djibouti                         | 1995-1999   | 0     |                                  |                   |                                                                                                                                                            |                  |                           |                                             |
| Djibouti                         | 2000-2004   | 0     |                                  |                   |                                                                                                                                                            |                  |                           |                                             |
| Djibouti                         | 2005-2009   | 0     |                                  |                   |                                                                                                                                                            |                  |                           |                                             |
| Djibouti                         | 2010-2016   | 0     |                                  |                   |                                                                                                                                                            |                  |                           |                                             |

Appendix Table 17. Underlying indicators for percent well-certified for data source with maximum percent well certified in each 5-year time interval for 195 countries, 1980-2016.

| Location                       | Time Window | Stars | Percent Well-Certified (PWC) (%) | Max PWC Data Year | Max PWC Data Source                                                                                                                             | Completeness (%) | Percent Major Garbage (%) | Verbal Autopsy Adjustment (None for VR) (%) |
|--------------------------------|-------------|-------|----------------------------------|-------------------|-------------------------------------------------------------------------------------------------------------------------------------------------|------------------|---------------------------|---------------------------------------------|
| Dominica                       | 1980-1984   | 4     | 70.4                             | 1984              | Vital Registration                                                                                                                              | 100.0            | 29.6                      |                                             |
| Dominica                       | 1985-1989   | 3     | 61.5                             | 1988              | Vital Registration                                                                                                                              | 93.5             | 34.2                      |                                             |
| Dominica                       | 1990-1994   | 3     | 62.1                             | 1990              | Vital Registration                                                                                                                              | 100.0            | 37.9                      |                                             |
| Dominica                       | 1995-1999   | 3     | 62.9                             | 1999              | Vital Registration                                                                                                                              | 100.0            | 37.1                      |                                             |
| Dominica                       | 2000-2004   | 4     | 69.5                             | 2004              | Vital Registration                                                                                                                              | 100.0            | 30.5                      |                                             |
| Dominica                       | 2005-2009   | 5     | 85.3                             | 2006              | Vital Registration                                                                                                                              | 100.0            | 14.7                      |                                             |
| Dominica                       | 2010-2016   | 4     | 83.6                             | 2011              | Vital Registration                                                                                                                              | 100.0            | 16.4                      |                                             |
| Dominican Republic             | 1980-1984   | 3     | 56.3                             | 1984              | Vital Registration                                                                                                                              | 85.3             | 34.0                      |                                             |
| Dominican Republic             | 1985-1989   | 3     | 56.3                             | 1985              | Vital Registration                                                                                                                              | 83.5             | 32.5                      |                                             |
| Dominican Republic             | 1990-1994   | 3     | 45.8                             | 1990              | Vital Registration                                                                                                                              | 68.4             | 33.0                      |                                             |
| Dominican Republic             | 1995-1999   | 3     | 54.0                             | 1999              | Vital Registration                                                                                                                              | 74.1             | 27.1                      |                                             |
| Dominican Republic             | 2000-2004   | 3     | 58.9                             | 2004              | Vital Registration                                                                                                                              | 77.4             | 23.8                      |                                             |
| Dominican Republic             | 2005-2009   | 3     | 58.2                             | 2005              | Vital Registration                                                                                                                              | 73.9             | 21.2                      |                                             |
| Dominican Republic             | 2010-2016   | 4     | 67.2                             | 2012              | Vital Registration                                                                                                                              | 84.7             | 20.7                      |                                             |
| Ecuador                        | 1980-1984   | 4     | 71.6                             | 1981              | Vital Registration                                                                                                                              | 99.3             | 27.9                      |                                             |
| Ecuador                        | 1985-1989   | 4     | 68.1                             | 1988              | Vital Registration                                                                                                                              | 95.0             | 28.4                      |                                             |
| Ecuador                        | 1990-1994   | 4     | 67.7                             | 1991              | Vital Registration                                                                                                                              | 94.3             | 28.2                      |                                             |
| Ecuador                        | 1995-1999   | 3     | 63.7                             | 1996              | Vital Registration                                                                                                                              | 88.9             | 28.4                      |                                             |
| Ecuador                        | 2000-2004   | 3     | 61.6                             | 2000              | Vital Registration                                                                                                                              | 92.5             | 33.4                      |                                             |
| Ecuador                        | 2005-2009   | 4     | 66.4                             | 2009              | Vital Registration                                                                                                                              | 88.7             | 25.1                      |                                             |
| Ecuador                        | 2010-2016   | 4     | 68.2                             | 2014              | Vital Registration                                                                                                                              | 86.5             | 21.1                      |                                             |
| Egypt                          | 1980-1984   | 2     | 33.3                             | 1980              | Vital Registration                                                                                                                              | 71.0             | 53.1                      |                                             |
| Egypt                          | 1985-1989   | 3     | 46.9                             | 1987              | Vital Registration                                                                                                                              | 91.6             | 48.7                      |                                             |
| Egypt                          | 1990-1994   | 3     | 43.7                             | 1991              | Vital Registration                                                                                                                              | 87.1             | 49.8                      |                                             |
| Egypt                          | 1995-1999   | 0     |                                  |                   |                                                                                                                                                 |                  |                           |                                             |
| Egypt                          | 2000-2004   | 3     | 42.9                             | 2003              | Vital Registration                                                                                                                              | 98.8             | 56.6                      |                                             |
| Egypt                          | 2005-2009   | 3     | 46.6                             | 2005              | Vital Registration                                                                                                                              | 94.8             | 57.2                      |                                             |
| Egypt                          | 2010-2016   | 3     | 48.4                             | 2014              | Vital Registration                                                                                                                              | 100.0            | 51.6                      |                                             |
| El Salvador                    | 1980-1984   | 4     | 72.8                             | 1981              | Vital Registration                                                                                                                              | 100.0            | 27.2                      |                                             |
| El Salvador                    | 1985-1989   | 0     |                                  |                   |                                                                                                                                                 |                  |                           |                                             |
| El Salvador                    | 1990-1994   | 3     | 57.8                             | 1993              | Vital Registration                                                                                                                              | 87.5             | 34.0                      |                                             |
| El Salvador                    | 1995-1999   | 3     | 63.4                             | 1998              | Vital Registration                                                                                                                              | 93.6             | 32.2                      |                                             |
| El Salvador                    | 2000-2004   | 4     | 65.6                             | 2001              | Vital Registration                                                                                                                              | 92.6             | 29.2                      |                                             |
| El Salvador                    | 2005-2009   | 4     | 66.6                             | 2006              | Vital Registration                                                                                                                              | 93.2             | 28.6                      |                                             |
| El Salvador                    | 2010-2016   | 3     | 64.0                             | 2011              | Vital Registration                                                                                                                              | 93.3             | 31.5                      |                                             |
| Equatorial Guinea              | 1980-1984   | 0     |                                  |                   |                                                                                                                                                 |                  |                           |                                             |
| Equatorial Guinea              | 1985-1989   | 0     |                                  |                   |                                                                                                                                                 |                  |                           |                                             |
| Equatorial Guinea              | 1990-1994   | 0     |                                  |                   |                                                                                                                                                 |                  |                           |                                             |
| Equatorial Guinea              | 1995-1999   | 0     |                                  |                   |                                                                                                                                                 |                  |                           |                                             |
| Equatorial Guinea              | 2000-2004   | 0     |                                  |                   |                                                                                                                                                 |                  |                           |                                             |
| Equatorial Guinea              | 2005-2009   | 0     |                                  |                   |                                                                                                                                                 |                  |                           |                                             |
| Equatorial Guinea              | 2010-2016   | 0     |                                  |                   |                                                                                                                                                 |                  |                           |                                             |
| Eritrea                        | 1980-1984   | 0     |                                  |                   |                                                                                                                                                 |                  |                           |                                             |
| Eritrea                        | 1985-1989   | 0     |                                  |                   |                                                                                                                                                 |                  |                           |                                             |
| Eritrea                        | 1990-1994   | 0     |                                  |                   |                                                                                                                                                 |                  |                           |                                             |
| Eritrea                        | 1995-1999   | 0     |                                  |                   |                                                                                                                                                 |                  |                           |                                             |
| Eritrea                        | 2000-2004   | 0     |                                  |                   |                                                                                                                                                 |                  |                           |                                             |
| Eritrea                        | 2005-2009   | 0     |                                  |                   |                                                                                                                                                 |                  |                           |                                             |
| Eritrea                        | 2010-2016   | 0     |                                  |                   |                                                                                                                                                 |                  |                           |                                             |
| Estonia                        | 1980-1984   | 5     | 89.0                             | 1981              | Vital Registration                                                                                                                              | 99.0             | 10.1                      |                                             |
| Estonia                        | 1985-1989   | 5     | 90.9                             | 1986              | Vital Registration                                                                                                                              | 100.0            | 9.1                       |                                             |
| Estonia                        | 1990-1994   | 5     | 93.7                             | 1994              | Vital Registration                                                                                                                              | 100.0            | 6.3                       |                                             |
| Estonia                        | 1995-1999   | 5     | 93.0                             | 1996              | Vital Registration                                                                                                                              | 99.8             | 6.8                       |                                             |
| Estonia                        | 2000-2004   | 5     | 92.0                             | 2003              | Vital Registration                                                                                                                              | 100.0            | 8.0                       |                                             |
| Estonia                        | 2005-2009   | 5     | 93.8                             | 2009              | Vital Registration                                                                                                                              | 99.6             | 5.8                       |                                             |
| Estonia                        | 2010-2016   | 5     | 93.8                             | 2010              | Vital Registration                                                                                                                              | 100.0            | 6.2                       |                                             |
| Ethiopia                       | 1980-1984   | 0     |                                  |                   |                                                                                                                                                 |                  |                           |                                             |
| Ethiopia                       | 1985-1989   | 1     | 1.1                              | 1987              | The Benjam rural health project in Ethiopia: mortality patterns of the under five                                                               |                  | 62.5                      | 2.9                                         |
| Ethiopia                       | 1990-1994   | 1     | 2.3                              | 1992              | Patterns of childhood mortality in three districts of north Gondar Administrative Zone: A community based study using the verbal autopsy method |                  | 16.8                      | 2.8                                         |
| Ethiopia                       | 1995-1999   | 1     | 0.6                              | 1997              | The use of simplified verbal autopsy in identifying causes of adult death in a predominantly rural population in Ethiopia                       |                  | 52.2                      | 1.2                                         |
| Ethiopia                       | 2000-2004   | 1     | 4.8                              | 2001              | HIV/AIDS-Related Mortality in Addis Ababa City Administration                                                                                   |                  | 24.5                      | 6.4                                         |
| Ethiopia                       | 2005-2009   | 3     | 46.6                             | 2009              | Verbal Autopsy                                                                                                                                  |                  | 27.2                      | 64.0                                        |
| Ethiopia                       | 2010-2016   | 3     | 45.5                             | 2010              | Verbal Autopsy                                                                                                                                  |                  | 28.9                      | 64.0                                        |
| Federated States of Micronesia | 1980-1984   | 0     |                                  |                   |                                                                                                                                                 |                  |                           |                                             |
| Federated States of Micronesia | 1985-1989   | 0     |                                  |                   |                                                                                                                                                 |                  |                           |                                             |
| Federated States of Micronesia | 1990-1994   | 0     |                                  |                   |                                                                                                                                                 |                  |                           |                                             |
| Federated States of Micronesia | 1995-1999   | 0     |                                  |                   |                                                                                                                                                 |                  |                           |                                             |
| Federated States of Micronesia | 2000-2004   | 0     |                                  |                   |                                                                                                                                                 |                  |                           |                                             |
| Federated States of Micronesia | 2005-2009   | 0     |                                  |                   |                                                                                                                                                 |                  |                           |                                             |
| Federated States of Micronesia | 2010-2016   | 0     |                                  |                   |                                                                                                                                                 |                  |                           |                                             |
| Fiji                           | 1980-1984   | 0     |                                  |                   |                                                                                                                                                 |                  |                           |                                             |
| Fiji                           | 1985-1989   | 0     |                                  |                   |                                                                                                                                                 |                  |                           |                                             |
| Fiji                           | 1990-1994   | 0     |                                  |                   |                                                                                                                                                 |                  |                           |                                             |
| Fiji                           | 1995-1999   | 2     | 31.2                             | 1999              | Vital Registration                                                                                                                              | 58.0             | 42.7                      |                                             |
| Fiji                           | 2000-2004   | 3     | 56.6                             | 2003              | Vital Registration                                                                                                                              | 97.8             | 42.1                      |                                             |
| Fiji                           | 2005-2009   | 3     | 58.8                             | 2008              | Vital Registration                                                                                                                              | 91.7             | 35.9                      |                                             |
| Fiji                           | 2010-2016   | 3     | 63.4                             | 2011              | Vital Registration                                                                                                                              | 91.2             | 30.4                      |                                             |
| Finland                        | 1980-1984   | 4     | 81.1                             | 1980              | Vital Registration                                                                                                                              | 100.0            | 18.9                      |                                             |
| Finland                        | 1985-1989   | 5     | 90.5                             | 1987              | Vital Registration                                                                                                                              | 99.4             | 8.9                       |                                             |
| Finland                        | 1990-1994   | 5     | 91.6                             | 1993              | Vital Registration                                                                                                                              | 100.0            | 8.4                       |                                             |
| Finland                        | 1995-1999   | 5     | 95.7                             | 1999              | Vital Registration                                                                                                                              | 99.9             | 4.2                       |                                             |
| Finland                        | 2000-2004   | 5     | 95.7                             | 2000              | Vital Registration                                                                                                                              | 100.0            | 4.3                       |                                             |
| Finland                        | 2005-2009   | 5     | 94.5                             | 2009              | Vital Registration                                                                                                                              | 99.4             | 4.9                       |                                             |
| Finland                        | 2010-2016   | 5     | 96.6                             | 2013              | Vital Registration                                                                                                                              | 100.0            | 4.4                       |                                             |
| France                         | 1980-1984   | 4     | 76.2                             | 1984              | Vital Registration                                                                                                                              | 100.0            | 23.8                      |                                             |
| France                         | 1985-1989   | 4     | 78.0                             | 1988              | Vital Registration                                                                                                                              | 100.0            | 22.0                      |                                             |
| France                         | 1990-1994   | 4     | 78.1                             | 1993              | Vital Registration                                                                                                                              | 100.0            | 21.9                      |                                             |
| France                         | 1995-1999   | 4     | 78.7                             | 1998              | Vital Registration                                                                                                                              | 100.0            | 21.3                      |                                             |
| France                         | 2000-2004   | 4     | 79.1                             | 2000              | Vital Registration                                                                                                                              | 100.0            | 20.9                      |                                             |
| France                         | 2005-2009   | 4     | 79.4                             | 2005              | Vital Registration                                                                                                                              | 100.0            | 20.6                      |                                             |
| France                         | 2010-2016   | 4     | 77.9                             | 2011              | Vital Registration                                                                                                                              | 99.6             | 21.8                      |                                             |
| Gabon                          | 1980-1984   | 0     |                                  |                   |                                                                                                                                                 |                  |                           |                                             |
| Gabon                          | 1985-1989   | 0     |                                  |                   |                                                                                                                                                 |                  |                           |                                             |
| Gabon                          | 1990-1994   | 0     |                                  |                   |                                                                                                                                                 |                  |                           |                                             |
| Gabon                          | 1995-1999   | 0     |                                  |                   |                                                                                                                                                 |                  |                           |                                             |
| Gabon                          | 2000-2004   | 0     |                                  |                   |                                                                                                                                                 |                  |                           |                                             |
| Gabon                          | 2005-2009   | 0     |                                  |                   |                                                                                                                                                 |                  |                           |                                             |
| Gabon                          | 2010-2016   | 0     |                                  |                   |                                                                                                                                                 |                  |                           |                                             |
| Georgia                        | 1980-1984   | 5     | 85.9                             | 1981              | Vital Registration                                                                                                                              | 95.8             | 10.4                      |                                             |
| Georgia                        | 1985-1989   | 4     | 83.2                             | 1985              | Vital Registration                                                                                                                              | 93.7             | 11.2                      |                                             |
| Georgia                        | 1990-1994   | 4     | 78.0                             | 1990              | Vital Registration                                                                                                                              | 84.9             | 8.1                       |                                             |
| Georgia                        | 1995-1999   | 4     | 74.2                             | 1999              | Vital Registration                                                                                                                              | 85.8             | 13.5                      |                                             |
| Georgia                        | 2000-2004   | 4     | 77.6                             | 2000              | Vital Registration                                                                                                                              | 87.6             | 11.5                      |                                             |
| Georgia                        | 2005-2009   | 3     | 51.2                             | 2005              | Vital Registration                                                                                                                              | 90.5             | 36.4                      |                                             |
| Georgia                        | 2010-2016   | 3     | 58.7                             | 2014              | Vital Registration                                                                                                                              | 99.4             | 40.9                      |                                             |
| Germany                        | 1980-1984   | 4     | 77.5                             | 1983              | Vital Registration                                                                                                                              | 100.0            | 22.5                      |                                             |
| Germany                        | 1985-1989   | 4     | 78.2                             | 1989              | Vital Registration                                                                                                                              | 98.3             | 20.5                      |                                             |
| Germany                        | 1990-1994   | 4     | 83.1                             | 1994              | Vital Registration                                                                                                                              | 100.0            | 16.9                      |                                             |
| Germany                        | 1995-1999   | 4     | 83.9                             | 1998              | Vital Registration                                                                                                                              | 100.0            | 16.1                      |                                             |
| Germany                        | 2000-2004   | 4     | 83.2                             | 2004              | Vital Registration                                                                                                                              | 99.6             | 16.5                      |                                             |
| Germany                        | 2005-2009   | 4     | 83.6                             | 2005              | Vital Registration                                                                                                                              | 100.0            | 16.4                      |                                             |
| Germany                        | 2010-2016   | 4     | 84.0                             | 2013              | Vital Registration                                                                                                                              | 100.0            | 16.0                      |                                             |
| Ghana                          | 1980-1984   | 0     |                                  |                   |                                                                                                                                                 |                  |                           |                                             |
| Ghana                          | 1985-1989   | 1     | 0.1                              | 1989              | Maternal mortality among the Kassena-Nankana of northern Ghana                                                                                  |                  | 79.0                      | 0.5                                         |

| Appendix Table 17. Underlying indicators for percent well-certified for data source with maximum percent well certified in each 5-year time interval for 195 countries, 1980-2016. |             |       |                                  |                   |                                                                                                                                                                                          |                  |                           |                                             |  |
|------------------------------------------------------------------------------------------------------------------------------------------------------------------------------------|-------------|-------|----------------------------------|-------------------|------------------------------------------------------------------------------------------------------------------------------------------------------------------------------------------|------------------|---------------------------|---------------------------------------------|--|
| Location                                                                                                                                                                           | Time Window | Stars | Percent Well-Certified (PWC) (%) | Max PWC Data Year | Max PWC Data Source                                                                                                                                                                      | Completeness (%) | Percent Major Garbage (%) | Verbal Autopsy Adjustment (None for VR) (%) |  |
| Ghana                                                                                                                                                                              | 1990-1994   | 1     | 1.6                              | 1990              | Vitamin A supplementation in northern Ghana: effects on clinic attendances, hospital admissions, and child mortality                                                                     |                  | 27.9                      | 2.2                                         |  |
| Ghana                                                                                                                                                                              | 1995-1999   | 1     | 0.9                              | 1998              | Trend and causes of neonatal mortality in the Kasena-Nankana district of northern Ghana, 1995-2002                                                                                       |                  | 6.0                       | 0.9                                         |  |
| Ghana                                                                                                                                                                              | 2000-2004   | 1     | 8.6                              | 2000              | Vital Registration                                                                                                                                                                       | 12.7             | 32.1                      |                                             |  |
| Ghana                                                                                                                                                                              | 2005-2009   | 2     | 20.8                             | 2006              | Ghana Child Verbal Autopsy Study 2008                                                                                                                                                    |                  | 8.2                       | 22.7                                        |  |
| Ghana                                                                                                                                                                              | 2010-2016   | 1     | 0.5                              | 2011              | Africa, Asia, Oceania - INDEPTH Network Cause-Specific Mortality - Release 2014                                                                                                          |                  | 92.7                      | 6.4                                         |  |
| Greece                                                                                                                                                                             | 1980-1984   | 4     | 79.7                             | 1984              | Vital Registration                                                                                                                                                                       | 98.8             | 19.4                      |                                             |  |
| Greece                                                                                                                                                                             | 1985-1989   | 4     | 81.1                             | 1985              | Vital Registration                                                                                                                                                                       | 100.0            | 18.9                      |                                             |  |
| Greece                                                                                                                                                                             | 1990-1994   | 4     | 71.3                             | 1994              | Vital Registration                                                                                                                                                                       | 99.5             | 28.4                      |                                             |  |
| Greece                                                                                                                                                                             | 1995-1999   | 4     | 71.9                             | 1995              | Vital Registration                                                                                                                                                                       | 100.0            | 28.1                      |                                             |  |
| Greece                                                                                                                                                                             | 2000-2004   | 4     | 72.2                             | 2001              | Vital Registration                                                                                                                                                                       | 99.6             | 27.5                      |                                             |  |
| Greece                                                                                                                                                                             | 2005-2009   | 4     | 76.5                             | 2007              | Vital Registration                                                                                                                                                                       | 100.0            | 23.5                      |                                             |  |
| Greece                                                                                                                                                                             | 2010-2016   | 4     | 74.1                             | 2010              | Vital Registration                                                                                                                                                                       | 98.6             | 24.9                      |                                             |  |
| Greenland                                                                                                                                                                          | 1980-1984   | 0     |                                  |                   |                                                                                                                                                                                          |                  |                           |                                             |  |
| Greenland                                                                                                                                                                          | 1985-1989   | 0     |                                  |                   |                                                                                                                                                                                          |                  |                           |                                             |  |
| Greenland                                                                                                                                                                          | 1990-1994   | 0     |                                  |                   |                                                                                                                                                                                          |                  |                           |                                             |  |
| Greenland                                                                                                                                                                          | 1995-1999   | 5     | 90.2                             | 1999              | Vital Registration                                                                                                                                                                       | 100.0            | 9.8                       |                                             |  |
| Greenland                                                                                                                                                                          | 2000-2004   | 5     | 89.7                             | 2001              | Vital Registration                                                                                                                                                                       | 100.0            | 10.3                      |                                             |  |
| Greenland                                                                                                                                                                          | 2005-2009   | 5     | 89.7                             | 2005              | Vital Registration                                                                                                                                                                       | 100.0            | 10.2                      |                                             |  |
| Greenland                                                                                                                                                                          | 2010-2016   | 5     | 87.8                             | 2010              | Vital Registration                                                                                                                                                                       | 100.0            | 12.2                      |                                             |  |
| Grenada                                                                                                                                                                            | 1980-1984   | 4     | 69.9                             | 1984              | Vital Registration                                                                                                                                                                       | 100.0            | 30.1                      |                                             |  |
| Grenada                                                                                                                                                                            | 1985-1989   | 3     | 61.4                             | 1988              | Vital Registration                                                                                                                                                                       | 100.0            | 38.6                      |                                             |  |
| Grenada                                                                                                                                                                            | 1990-1994   | 3     | 62.0                             | 1994              | Vital Registration                                                                                                                                                                       | 100.0            | 38.0                      |                                             |  |
| Grenada                                                                                                                                                                            | 1995-1999   | 3     | 60.7                             | 1995              | Vital Registration                                                                                                                                                                       | 100.0            | 39.3                      |                                             |  |
| Grenada                                                                                                                                                                            | 2000-2004   | 4     | 77.3                             | 2002              | Vital Registration                                                                                                                                                                       | 100.0            | 22.7                      |                                             |  |
| Grenada                                                                                                                                                                            | 2005-2009   | 4     | 76.3                             | 2009              | Vital Registration                                                                                                                                                                       | 96.1             | 20.6                      |                                             |  |
| Grenada                                                                                                                                                                            | 2010-2016   | 4     | 83.8                             | 2012              | Vital Registration                                                                                                                                                                       | 99.5             | 15.8                      |                                             |  |
| Guam                                                                                                                                                                               | 1980-1984   | 0     |                                  |                   |                                                                                                                                                                                          |                  |                           |                                             |  |
| Guam                                                                                                                                                                               | 1985-1989   | 0     |                                  |                   |                                                                                                                                                                                          |                  |                           |                                             |  |
| Guam                                                                                                                                                                               | 1990-1994   | 5     | 89.0                             | 1994              | Vital Registration                                                                                                                                                                       | 96.0             | 7.2                       |                                             |  |
| Guam                                                                                                                                                                               | 1995-1999   | 5     | 85.9                             | 1999              | Vital Registration                                                                                                                                                                       | 91.0             | 7.7                       |                                             |  |
| Guam                                                                                                                                                                               | 2000-2004   | 4     | 77.1                             | 2000              | Vital Registration                                                                                                                                                                       | 85.4             | 9.8                       |                                             |  |
| Guam                                                                                                                                                                               | 2005-2009   | 4     | 71.8                             | 2007              | Vital Registration                                                                                                                                                                       | 77.3             | 7.0                       |                                             |  |
| Guam                                                                                                                                                                               | 2010-2016   | 4     | 66.1                             | 2010              | Vital Registration                                                                                                                                                                       | 73.7             | 10.3                      |                                             |  |
| Guatemala                                                                                                                                                                          | 1980-1984   | 4     | 79.2                             | 1980              | Vital Registration                                                                                                                                                                       | 98.9             | 19.9                      |                                             |  |
| Guatemala                                                                                                                                                                          | 1985-1989   | 4     | 70.5                             | 1987              | Vital Registration                                                                                                                                                                       | 97.4             | 27.7                      |                                             |  |
| Guatemala                                                                                                                                                                          | 1990-1994   | 4     | 71.5                             | 1990              | Vital Registration                                                                                                                                                                       | 100.0            | 28.5                      |                                             |  |
| Guatemala                                                                                                                                                                          | 1995-1999   | 4     | 70.8                             | 1998              | Vital Registration                                                                                                                                                                       | 100.0            | 29.2                      |                                             |  |
| Guatemala                                                                                                                                                                          | 2000-2004   | 4     | 67.9                             | 2001              | Vital Registration                                                                                                                                                                       | 96.5             | 29.4                      |                                             |  |
| Guatemala                                                                                                                                                                          | 2005-2009   | 4     | 70.7                             | 2009              | Vital Registration                                                                                                                                                                       | 93.9             | 24.7                      |                                             |  |
| Guatemala                                                                                                                                                                          | 2010-2016   | 4     | 73.4                             | 2014              | Vital Registration                                                                                                                                                                       | 91.6             | 21.5                      |                                             |  |
| Guinea                                                                                                                                                                             | 1980-1984   | 0     |                                  |                   |                                                                                                                                                                                          |                  |                           |                                             |  |
| Guinea                                                                                                                                                                             | 1985-1989   | 0     |                                  |                   |                                                                                                                                                                                          |                  |                           |                                             |  |
| Guinea                                                                                                                                                                             | 1990-1994   | 0     |                                  |                   |                                                                                                                                                                                          |                  |                           |                                             |  |
| Guinea                                                                                                                                                                             | 1995-1999   | 1     | 3.3                              | 1998              | Guinea - Maramba Mortality Study 1998-1999                                                                                                                                               |                  | 5.5                       | 3.5                                         |  |
| Guinea                                                                                                                                                                             | 2000-2004   | 0     |                                  |                   |                                                                                                                                                                                          |                  |                           |                                             |  |
| Guinea                                                                                                                                                                             | 2005-2009   | 0     |                                  |                   |                                                                                                                                                                                          |                  |                           |                                             |  |
| Guinea                                                                                                                                                                             | 2010-2016   | 0     |                                  |                   |                                                                                                                                                                                          |                  |                           |                                             |  |
| Guinea-Bissau                                                                                                                                                                      | 1980-1984   | 0     |                                  |                   |                                                                                                                                                                                          |                  |                           |                                             |  |
| Guinea-Bissau                                                                                                                                                                      | 1985-1989   | 0     |                                  |                   |                                                                                                                                                                                          |                  |                           |                                             |  |
| Guinea-Bissau                                                                                                                                                                      | 1990-1994   | 1     | 0.1                              | 1992              | Maternal mortality in Guinea-Bissau: the use of verbal autopsy in a multi-ethnic population                                                                                              |                  | 80.2                      | 0.4                                         |  |
| Guinea-Bissau                                                                                                                                                                      | 1995-1999   | 1     | 1.1                              | 1995              | BCG vaccination scar associated with better childhood survival in Guinea-Bissau                                                                                                          |                  | 45.6                      | 2.1                                         |  |
| Guinea-Bissau                                                                                                                                                                      | 2000-2004   | 0     |                                  |                   |                                                                                                                                                                                          |                  |                           |                                             |  |
| Guinea-Bissau                                                                                                                                                                      | 2005-2009   | 0     |                                  |                   |                                                                                                                                                                                          |                  |                           |                                             |  |
| Guinea-Bissau                                                                                                                                                                      | 2010-2016   | 0     |                                  |                   |                                                                                                                                                                                          |                  |                           |                                             |  |
| Guyana                                                                                                                                                                             | 1980-1984   | 3     | 51.5                             | 1984              | Vital Registration                                                                                                                                                                       | 80.5             | 36.1                      |                                             |  |
| Guyana                                                                                                                                                                             | 1985-1989   | 4     | 71.7                             | 1989              | Vital Registration                                                                                                                                                                       | 91.0             | 24.4                      |                                             |  |
| Guyana                                                                                                                                                                             | 1990-1994   | 3     | 64.0                             | 1990              | Vital Registration                                                                                                                                                                       | 86.8             | 26.3                      |                                             |  |
| Guyana                                                                                                                                                                             | 1995-1999   | 4     | 66.2                             | 1997              | Vital Registration                                                                                                                                                                       | 91.6             | 27.7                      |                                             |  |
| Guyana                                                                                                                                                                             | 2000-2004   | 4     | 79.0                             | 2000              | Vital Registration                                                                                                                                                                       | 90.9             | 13.1                      |                                             |  |
| Guyana                                                                                                                                                                             | 2005-2009   | 4     | 77.7                             | 2005              | Vital Registration                                                                                                                                                                       | 89.3             | 12.9                      |                                             |  |
| Guyana                                                                                                                                                                             | 2010-2016   | 4     | 73.5                             | 2010              | Vital Registration                                                                                                                                                                       | 89.2             | 17.6                      |                                             |  |
| Haiti                                                                                                                                                                              | 1980-1984   | 2     | 19.3                             | 1981              | Vital Registration                                                                                                                                                                       | 43.1             | 55.3                      |                                             |  |
| Haiti                                                                                                                                                                              | 1985-1989   | 1     | 1.4                              | 1989              | The utility of verbal autopsies for identifying HIV-1-related deaths in Haitian children                                                                                                 |                  | 21.7                      | 1.8                                         |  |
| Haiti                                                                                                                                                                              | 1990-1994   | 1     | 1.1                              | 1994              | Survey on Infant mortality in Mirebalais, Haiti                                                                                                                                          |                  | 36.5                      | 1.7                                         |  |
| Haiti                                                                                                                                                                              | 1995-1999   | 2     | 10.6                             | 1999              | Vital Registration                                                                                                                                                                       | 23.2             | 54.4                      |                                             |  |
| Haiti                                                                                                                                                                              | 2000-2004   | 1     | 4.6                              | 2002              | Vital Registration                                                                                                                                                                       | 7.7              | 41.2                      |                                             |  |
| Haiti                                                                                                                                                                              | 2005-2009   | 0     |                                  |                   |                                                                                                                                                                                          |                  |                           |                                             |  |
| Haiti                                                                                                                                                                              | 2010-2016   | 0     |                                  |                   |                                                                                                                                                                                          |                  |                           |                                             |  |
| Honduras                                                                                                                                                                           | 1980-1984   | 2     | 31.7                             | 1981              | Vital Registration                                                                                                                                                                       | 62.2             | 49.0                      |                                             |  |
| Honduras                                                                                                                                                                           | 1985-1989   | 3     | 36.9                             | 1988              | Vital Registration                                                                                                                                                                       | 56.8             | 35.1                      |                                             |  |
| Honduras                                                                                                                                                                           | 1990-1994   | 3     | 35.6                             | 1990              | Vital Registration                                                                                                                                                                       | 55.2             | 35.5                      |                                             |  |
| Honduras                                                                                                                                                                           | 1995-1999   | 1     | 0.4                              | 1997              | Honduras Maternal Mortality Ratio Update 2010                                                                                                                                            |                  | 92.4                      | 5.1                                         |  |
| Honduras                                                                                                                                                                           | 2000-2004   | 0     |                                  |                   |                                                                                                                                                                                          |                  |                           |                                             |  |
| Honduras                                                                                                                                                                           | 2005-2009   | 2     | 12.4                             | 2008              | Vital Registration                                                                                                                                                                       | 14.1             | 11.8                      |                                             |  |
| Honduras                                                                                                                                                                           | 2010-2016   | 2     | 13.9                             | 2013              | Vital Registration                                                                                                                                                                       | 15.3             | 9.4                       |                                             |  |
| Hungary                                                                                                                                                                            | 1980-1984   | 5     | 90.6                             | 1980              | Vital Registration                                                                                                                                                                       | 100.0            | 9.4                       |                                             |  |
| Hungary                                                                                                                                                                            | 1985-1989   | 5     | 89.3                             | 1989              | Vital Registration                                                                                                                                                                       | 100.0            | 10.7                      |                                             |  |
| Hungary                                                                                                                                                                            | 1990-1994   | 5     | 89.9                             | 1994              | Vital Registration                                                                                                                                                                       | 100.0            | 10.1                      |                                             |  |
| Hungary                                                                                                                                                                            | 1995-1999   | 5     | 90.8                             | 1998              | Vital Registration                                                                                                                                                                       | 100.0            | 9.2                       |                                             |  |
| Hungary                                                                                                                                                                            | 2000-2004   | 5     | 92.6                             | 2004              | Vital Registration                                                                                                                                                                       | 100.0            | 7.4                       |                                             |  |
| Hungary                                                                                                                                                                            | 2005-2009   | 5     | 93.3                             | 2009              | Vital Registration                                                                                                                                                                       | 100.0            | 6.7                       |                                             |  |
| Hungary                                                                                                                                                                            | 2010-2016   | 5     | 93.6                             | 2011              | Vital Registration                                                                                                                                                                       | 100.0            | 6.4                       |                                             |  |
| Iceland                                                                                                                                                                            | 1980-1984   | 5     | 91.3                             | 1982              | Vital Registration                                                                                                                                                                       | 99.6             | 8.4                       |                                             |  |
| Iceland                                                                                                                                                                            | 1985-1989   | 5     | 92.8                             | 1989              | Vital Registration                                                                                                                                                                       | 100.0            | 7.2                       |                                             |  |
| Iceland                                                                                                                                                                            | 1990-1994   | 5     | 94.0                             | 1991              | Vital Registration                                                                                                                                                                       | 100.0            | 6.0                       |                                             |  |
| Iceland                                                                                                                                                                            | 1995-1999   | 5     | 94.1                             | 1999              | Vital Registration                                                                                                                                                                       | 100.0            | 5.9                       |                                             |  |
| Iceland                                                                                                                                                                            | 2000-2004   | 5     | 93.5                             | 2004              | Vital Registration                                                                                                                                                                       | 100.0            | 6.5                       |                                             |  |
| Iceland                                                                                                                                                                            | 2005-2009   | 5     | 92.8                             | 2005              | Vital Registration                                                                                                                                                                       | 99.9             | 7.1                       |                                             |  |
| Iceland                                                                                                                                                                            | 2010-2016   | 5     | 91.4                             | 2010              | Vital Registration                                                                                                                                                                       | 100.0            | 8.6                       |                                             |  |
| India                                                                                                                                                                              | 1980-1984   | 1     | 3.6                              | 1980              | India Survey of Causes of Death 1980                                                                                                                                                     |                  | 44.1                      | 6.4                                         |  |
| India                                                                                                                                                                              | 1985-1989   | 1     | 3.5                              | 1985              | India Survey of Causes of Death 1985                                                                                                                                                     |                  | 44.6                      | 6.4                                         |  |
| India                                                                                                                                                                              | 1990-1994   | 1     | 3.7                              | 1994              | India Cause of Death Dataset Version 1.3 1980-1998                                                                                                                                       |                  | 42.5                      | 6.4                                         |  |
| India                                                                                                                                                                              | 1995-1999   | 1     | 4.9                              | 1999              | Vital Registration                                                                                                                                                                       | 8.0              | 38.3                      |                                             |  |
| India                                                                                                                                                                              | 2000-2004   | 1     | 5.2                              | 2001              | Vital Registration                                                                                                                                                                       | 8.3              | 37.1                      |                                             |  |
| India                                                                                                                                                                              | 2005-2009   | 3     | 52.8                             | 2005              | Verbal Autopsy                                                                                                                                                                           |                  | 17.6                      | 64.0                                        |  |
| India                                                                                                                                                                              | 2010-2016   | 3     | 49.1                             | 2012              | Verbal Autopsy                                                                                                                                                                           |                  | 23.3                      | 64.0                                        |  |
| Indonesia                                                                                                                                                                          | 1980-1984   | 1     | 0.1                              | 1981              | Reproductive Mortality in Two Developing Countries                                                                                                                                       |                  | 77.0                      | 0.5                                         |  |
| Indonesia                                                                                                                                                                          | 1985-1989   | 0     |                                  |                   |                                                                                                                                                                                          |                  |                           |                                             |  |
| Indonesia                                                                                                                                                                          | 1990-1994   | 1     | 1.3                              | 1991              | Care-seeking for fatal illnesses in young children in Indramayu, West Java, Indonesia                                                                                                    |                  | 23.4                      | 1.7                                         |  |
| Indonesia                                                                                                                                                                          | 1995-1999   | 1     | 0.4                              | 1997              | Age- and cause-specific childhood mortality in Lombok, Indonesia, as a factor for determining the appropriateness of introducing Haemophilus influenzae type b and pneumococcal vaccines |                  | 34.1                      | 0.6                                         |  |
| Indonesia                                                                                                                                                                          | 2000-2004   | 1     | 0.1                              | 2002              | Africa, Asia, Oceania - INDEPTH Network Cause-Specific Mortality - Release 2014                                                                                                          |                  | 97.8                      | 6.4                                         |  |
| Indonesia                                                                                                                                                                          | 2005-2009   | 3     | 42.8                             | 2007              | Indonesia Basic Health Research 2007-2008                                                                                                                                                |                  | 22.6                      | 55.3                                        |  |
| Indonesia                                                                                                                                                                          | 2010-2016   | 3     | 56.7                             | 2012              | Indonesia Sample Registration System - Deaths 2012                                                                                                                                       |                  | 11.4                      | 64.0                                        |  |
| Iran                                                                                                                                                                               | 1980-1984   | 2     | 13.3                             | 1982              | Vital Registration                                                                                                                                                                       | 23.8             | 44.1                      |                                             |  |

Appendix Table 17. Underlying indicators for percent well-certified for data source with maximum percent well certified in each 5-year time interval for 195 countries, 1980-2016.

| Location   | Time Window | Stars | Percent Well-Certified (PWC) (%) | Max PWC Data Year | Max PWC Data Source                                                                                                                                  | Completeness (%) | Percent Major Garbage (%) | Verbal Autopsy Adjustment (None for VR) (%) |
|------------|-------------|-------|----------------------------------|-------------------|------------------------------------------------------------------------------------------------------------------------------------------------------|------------------|---------------------------|---------------------------------------------|
| Iran       | 1985-1989   | 2     | 13.0                             | 1985              |                                                                                                                                                      | 25.7             | 49.4                      |                                             |
| Iran       | 1990-1994   | 0     |                                  |                   |                                                                                                                                                      |                  |                           |                                             |
| Iran       | 1995-1999   | 2     | 31.3                             | 1999              | Vital Registration                                                                                                                                   | 74.2             | 57.8                      |                                             |
| Iran       | 2000-2004   | 5     | 91.5                             | 2003              | Vital Registration                                                                                                                                   | 92.1             | 0.6                       |                                             |
| Iran       | 2005-2009   | 3     | 60.7                             | 2006              | Vital Registration                                                                                                                                   | 72.8             | 16.5                      |                                             |
| Iran       | 2010-2016   | 4     | 71.7                             | 2015              | Vital Registration                                                                                                                                   | 90.6             | 20.9                      |                                             |
| Iraq       | 1980-1984   | 0     |                                  |                   |                                                                                                                                                      |                  |                           |                                             |
| Iraq       | 1985-1989   | 0     |                                  |                   |                                                                                                                                                      |                  |                           |                                             |
| Iraq       | 1990-1994   | 0     |                                  |                   |                                                                                                                                                      |                  |                           |                                             |
| Iraq       | 1995-1999   | 0     |                                  |                   |                                                                                                                                                      |                  |                           |                                             |
| Iraq       | 2000-2004   | 0     |                                  |                   |                                                                                                                                                      |                  |                           |                                             |
| Iraq       | 2005-2009   | 2     | 32.2                             | 2008              | Vital Registration                                                                                                                                   | 55.0             | 41.6                      |                                             |
| Iraq       | 2010-2016   | 0     |                                  |                   |                                                                                                                                                      |                  |                           |                                             |
| Ireland    | 1980-1984   | 5     | 90.1                             | 1983              | Vital Registration                                                                                                                                   | 100.0            | 9.9                       |                                             |
| Ireland    | 1985-1989   | 5     | 91.1                             | 1989              | Vital Registration                                                                                                                                   | 100.0            | 8.9                       |                                             |
| Ireland    | 1990-1994   | 5     | 91.5                             | 1993              | Vital Registration                                                                                                                                   | 100.0            | 8.5                       |                                             |
| Ireland    | 1995-1999   | 5     | 90.7                             | 1995              | Vital Registration                                                                                                                                   | 100.0            | 9.3                       |                                             |
| Ireland    | 2000-2004   | 5     | 90.6                             | 2000              | Vital Registration                                                                                                                                   | 100.0            | 9.4                       |                                             |
| Ireland    | 2005-2009   | 5     | 92.5                             | 2007              | Vital Registration                                                                                                                                   | 100.0            | 7.5                       |                                             |
| Ireland    | 2010-2016   | 5     | 92.4                             | 2012              | Vital Registration                                                                                                                                   | 100.0            | 7.6                       |                                             |
| Israel     | 1980-1984   | 4     | 80.9                             | 1983              | Vital Registration                                                                                                                                   | 100.0            | 19.1                      |                                             |
| Israel     | 1985-1989   | 4     | 81.7                             | 1989              | Vital Registration                                                                                                                                   | 100.0            | 18.3                      |                                             |
| Israel     | 1990-1994   | 4     | 82.8                             | 1994              | Vital Registration                                                                                                                                   | 100.0            | 17.2                      |                                             |
| Israel     | 1995-1999   | 4     | 83.3                             | 1996              | Vital Registration                                                                                                                                   | 100.0            | 16.7                      |                                             |
| Israel     | 2000-2004   | 4     | 81.8                             | 2002              | Vital Registration                                                                                                                                   | 100.0            | 18.2                      |                                             |
| Israel     | 2005-2009   | 4     | 80.2                             | 2005              | Vital Registration                                                                                                                                   | 100.0            | 19.8                      |                                             |
| Israel     | 2010-2016   | 4     | 79.8                             | 2010              | Vital Registration                                                                                                                                   | 97.9             | 19.2                      |                                             |
| Italy      | 1980-1984   | 5     | 88.5                             | 1980              | Vital Registration                                                                                                                                   | 100.0            | 11.5                      |                                             |
| Italy      | 1985-1989   | 5     | 87.8                             | 1988              | Vital Registration                                                                                                                                   | 99.9             | 12.1                      |                                             |
| Italy      | 1990-1994   | 5     | 87.7                             | 1991              | Vital Registration                                                                                                                                   | 100.0            | 12.3                      |                                             |
| Italy      | 1995-1999   | 5     | 87.3                             | 1998              | Vital Registration                                                                                                                                   | 100.0            | 12.7                      |                                             |
| Italy      | 2000-2004   | 5     | 88.2                             | 2003              | Vital Registration                                                                                                                                   | 100.0            | 11.8                      |                                             |
| Italy      | 2005-2009   | 5     | 88.7                             | 2008              | Vital Registration                                                                                                                                   | 100.0            | 11.3                      |                                             |
| Italy      | 2010-2016   | 5     | 87.7                             | 2012              | Vital Registration                                                                                                                                   | 100.0            | 12.3                      |                                             |
| Jamaica    | 1980-1984   | 3     | 64.6                             | 1983              | Vital Registration                                                                                                                                   | 91.1             | 29.1                      |                                             |
| Jamaica    | 1985-1989   | 4     | 66.1                             | 1987              | Vital Registration                                                                                                                                   | 92.2             | 28.3                      |                                             |
| Jamaica    | 1990-1994   | 3     | 55.8                             | 1990              | Vital Registration                                                                                                                                   | 83.1             | 32.9                      |                                             |
| Jamaica    | 1995-1999   | 0     |                                  |                   |                                                                                                                                                      |                  |                           |                                             |
| Jamaica    | 2000-2004   | 4     | 68.4                             | 2000              | Vital Registration                                                                                                                                   | 89.1             | 23.3                      |                                             |
| Jamaica    | 2005-2009   | 4     | 77.2                             | 2009              | Vital Registration                                                                                                                                   | 88.4             | 12.7                      |                                             |
| Jamaica    | 2010-2016   | 4     | 75.7                             | 2011              | Vital Registration                                                                                                                                   | 84.9             | 10.8                      |                                             |
| Japan      | 1980-1984   | 4     | 82.5                             | 1980              | Vital Registration                                                                                                                                   | 100.0            | 17.5                      |                                             |
| Japan      | 1985-1989   | 4     | 80.8                             | 1985              | Vital Registration                                                                                                                                   | 99.8             | 19.0                      |                                             |
| Japan      | 1990-1994   | 4     | 80.5                             | 1994              | Vital Registration                                                                                                                                   | 98.6             | 18.4                      |                                             |
| Japan      | 1995-1999   | 5     | 87.6                             | 1995              | Vital Registration                                                                                                                                   | 100.0            | 12.4                      |                                             |
| Japan      | 2000-2004   | 4     | 84.9                             | 2000              | Vital Registration                                                                                                                                   | 98.5             | 13.8                      |                                             |
| Japan      | 2005-2009   | 4     | 84.3                             | 2005              | Vital Registration                                                                                                                                   | 100.0            | 15.7                      |                                             |
| Japan      | 2010-2016   | 4     | 81.2                             | 2010              | Vital Registration                                                                                                                                   | 100.0            | 18.8                      |                                             |
| Jordan     | 1980-1984   | 0     |                                  |                   |                                                                                                                                                      |                  |                           |                                             |
| Jordan     | 1985-1989   | 0     |                                  |                   |                                                                                                                                                      |                  |                           |                                             |
| Jordan     | 1990-1994   | 0     |                                  |                   |                                                                                                                                                      |                  |                           |                                             |
| Jordan     | 1995-1999   | 1     | 1.0                              | 1995              | Mortality and causes of death in Jordan 1995<br>96% assessment by verbal autopsy                                                                     |                  | 82.2                      | 5.4                                         |
| Jordan     | 2000-2004   | 4     | 68.2                             | 2004              | Vital Registration                                                                                                                                   | 86.2             | 20.8                      |                                             |
| Jordan     | 2005-2009   | 4     | 76.3                             | 2006              | Vital Registration                                                                                                                                   | 92.4             | 17.4                      |                                             |
| Jordan     | 2010-2016   | 3     | 64.2                             | 2012              | Vital Registration                                                                                                                                   | 79.6             | 19.4                      |                                             |
| Kazakhstan | 1980-1984   | 4     | 76.3                             | 1982              | Vital Registration                                                                                                                                   | 95.2             | 19.8                      |                                             |
| Kazakhstan | 1985-1989   | 4     | 81.5                             | 1988              | Vital Registration                                                                                                                                   | 99.2             | 17.8                      |                                             |
| Kazakhstan | 1990-1994   | 5     | 88.5                             | 1993              | Vital Registration                                                                                                                                   | 100.0            | 10.5                      |                                             |
| Kazakhstan | 1995-1999   | 5     | 89.0                             | 1995              | Vital Registration                                                                                                                                   | 100.0            | 11.0                      |                                             |
| Kazakhstan | 2000-2004   | 4     | 82.2                             | 2003              | Vital Registration                                                                                                                                   | 95.8             | 14.2                      |                                             |
| Kazakhstan | 2005-2009   | 4     | 77.8                             | 2008              | Vital Registration                                                                                                                                   | 97.3             | 20.0                      |                                             |
| Kazakhstan | 2010-2016   | 5     | 86.1                             | 2015              | Vital Registration                                                                                                                                   | 98.3             | 12.5                      |                                             |
| Kenya      | 1980-1984   | 0     |                                  |                   |                                                                                                                                                      |                  |                           |                                             |
| Kenya      | 1985-1989   | 1     | 2.8                              | 1986              | Mortality patterns in a rural Kenyan community                                                                                                       |                  | 12.0                      | 3.2                                         |
| Kenya      | 1990-1994   | 0     |                                  |                   |                                                                                                                                                      |                  |                           |                                             |
| Kenya      | 1995-1999   | 1     | 0.5                              | 1997              | The burden of malaria mortality among African children in the year 2000                                                                              |                  | 82.2                      | 2.7                                         |
| Kenya      | 2000-2004   | 1     | 5.1                              | 2003              | Kenya - Nairobi Urban Health and Demographic Surveillance System                                                                                     |                  | 19.1                      | 6.4                                         |
| Kenya      | 2005-2009   | 1     | 5.4                              | 2006              | Kenya - Nairobi Urban Health and Demographic Surveillance System                                                                                     |                  | 15.6                      | 6.4                                         |
| Kenya      | 2010-2016   | 1     | 0.8                              | 2011              | Africa, Asia, Oceania - INDEPTH Network Cause-Specific Mortality - Release 2014                                                                      |                  | 87.7                      | 6.4                                         |
| Kiribati   | 1980-1984   | 0     |                                  |                   |                                                                                                                                                      |                  |                           |                                             |
| Kiribati   | 1985-1989   | 0     |                                  |                   |                                                                                                                                                      |                  |                           |                                             |
| Kiribati   | 1990-1994   | 3     | 43.7                             | 1993              | Vital Registration                                                                                                                                   | 66.2             | 34.1                      |                                             |
| Kiribati   | 1995-1999   | 4     | 69.1                             | 1995              | Vital Registration                                                                                                                                   | 100.0            | 30.9                      |                                             |
| Kiribati   | 2000-2004   | 2     | 34.4                             | 2000              | Vital Registration                                                                                                                                   | 61.4             | 43.9                      |                                             |
| Kiribati   | 2005-2009   | 0     |                                  |                   |                                                                                                                                                      |                  |                           |                                             |
| Kiribati   | 2010-2016   | 0     |                                  |                   |                                                                                                                                                      |                  |                           |                                             |
| Kuwait     | 1980-1984   | 4     | 81.5                             | 1980              | Vital Registration                                                                                                                                   | 99.8             | 18.3                      |                                             |
| Kuwait     | 1985-1989   | 4     | 82.0                             | 1985              | Vital Registration                                                                                                                                   | 100.0            | 18.0                      |                                             |
| Kuwait     | 1990-1994   | 4     | 75.6                             | 1994              | Vital Registration                                                                                                                                   | 96.1             | 21.3                      |                                             |
| Kuwait     | 1995-1999   | 4     | 78.1                             | 1998              | Vital Registration                                                                                                                                   | 100.0            | 21.9                      |                                             |
| Kuwait     | 2000-2004   | 4     | 83.4                             | 2004              | Vital Registration                                                                                                                                   | 100.0            | 16.6                      |                                             |
| Kuwait     | 2005-2009   | 4     | 85.0                             | 2009              | Vital Registration                                                                                                                                   | 100.0            | 15.0                      |                                             |
| Kuwait     | 2010-2016   | 4     | 83.5                             | 2012              | Vital Registration                                                                                                                                   | 100.0            | 16.5                      |                                             |
| Kyrgyzstan | 1980-1984   | 4     | 71.0                             | 1981              | Vital Registration                                                                                                                                   | 87.5             | 18.9                      |                                             |
| Kyrgyzstan | 1985-1989   | 4     | 76.4                             | 1988              | Vital Registration                                                                                                                                   | 89.4             | 14.6                      |                                             |
| Kyrgyzstan | 1990-1994   | 4     | 71.0                             | 1994              | Vital Registration                                                                                                                                   | 93.6             | 24.2                      |                                             |
| Kyrgyzstan | 1995-1999   | 4     | 73.0                             | 1998              | Vital Registration                                                                                                                                   | 92.2             | 20.8                      |                                             |
| Kyrgyzstan | 2000-2004   | 5     | 85.9                             | 2002              | Vital Registration                                                                                                                                   | 93.4             | 8.1                       |                                             |
| Kyrgyzstan | 2005-2009   | 5     | 87.7                             | 2006              | Vital Registration                                                                                                                                   | 94.0             | 6.7                       |                                             |
| Kyrgyzstan | 2010-2016   | 5     | 90.9                             | 2014              | Vital Registration                                                                                                                                   | 97.4             | 6.7                       |                                             |
| Laos       | 1980-1984   | 0     |                                  |                   |                                                                                                                                                      |                  |                           |                                             |
| Laos       | 1985-1989   | 1     | 1.3                              | 1989              | The Lao People's Democratic Republic: maternal mortality and female mortality: determining causes of deaths                                          |                  | 68.7                      | 4.1                                         |
| Laos       | 1990-1994   | 0     |                                  |                   |                                                                                                                                                      |                  |                           |                                             |
| Laos       | 1995-1999   | 0     |                                  |                   |                                                                                                                                                      |                  |                           |                                             |
| Laos       | 2000-2004   | 0     |                                  |                   |                                                                                                                                                      |                  |                           |                                             |
| Laos       | 2005-2009   | 0     |                                  |                   |                                                                                                                                                      |                  |                           |                                             |
| Laos       | 2010-2016   | 0     |                                  |                   |                                                                                                                                                      |                  |                           |                                             |
| Latvia     | 1980-1984   | 5     | 90.6                             | 1984              | Vital Registration                                                                                                                                   | 99.7             | 9.1                       |                                             |
| Latvia     | 1985-1989   | 5     | 91.4                             | 1985              | Vital Registration                                                                                                                                   | 100.0            | 8.6                       |                                             |
| Latvia     | 1990-1994   | 5     | 87.9                             | 1990              | Vital Registration                                                                                                                                   | 100.0            | 12.1                      |                                             |
| Latvia     | 1995-1999   | 5     | 92.9                             | 1999              | Vital Registration                                                                                                                                   | 100.0            | 8.0                       |                                             |
| Latvia     | 2000-2004   | 5     | 91.1                             | 2000              | Vital Registration                                                                                                                                   | 100.0            | 8.9                       |                                             |
| Latvia     | 2005-2009   | 5     | 89.2                             | 2007              | Vital Registration                                                                                                                                   | 100.0            | 10.8                      |                                             |
| Latvia     | 2010-2016   | 5     | 93.8                             | 2013              | Vital Registration                                                                                                                                   | 100.0            | 6.2                       |                                             |
| Lebanon    | 1980-1984   | 0     |                                  |                   |                                                                                                                                                      |                  |                           |                                             |
| Lebanon    | 1985-1989   | 1     | 2.2                              | 1988              | Non-communicable disease mortality rates using the verbal autopsy in a cohort of middle aged and older populations in Beirut during wartime, 1983-93 |                  | 31.5                      | 3.2                                         |
| Lebanon    | 1990-1994   | 0     |                                  |                   |                                                                                                                                                      |                  |                           |                                             |
| Lebanon    | 1995-1999   | 0     |                                  |                   |                                                                                                                                                      |                  |                           |                                             |
| Lebanon    | 2000-2004   | 1     | 0.0                              | 2000              | Facility-based audit of maternal mortality in Lebanon: A feasibility study                                                                           |                  | 94.6                      | 0.4                                         |
| Lebanon    | 2005-2009   | 0     |                                  |                   |                                                                                                                                                      |                  |                           |                                             |
| Lebanon    | 2010-2016   | 0     |                                  |                   |                                                                                                                                                      |                  |                           |                                             |
| Lesotho    | 1980-1984   | 0     |                                  |                   |                                                                                                                                                      |                  |                           |                                             |
| Lesotho    | 1985-1989   | 0     |                                  |                   |                                                                                                                                                      |                  |                           |                                             |

Appendix Table 17. Underlying indicators for percent well-certified for data source with maximum percent well certified in each 5-year time interval for 195 countries, 1980-2016.

| Location         | Time Window | Stars | Percent Well-Certified (PWC) (%) | Max PWC Data Year | Max PWC Data Source                                                                                           | Completeness (%) | Percent Major Garbage (%) | Verbal Autopsy Adjustment (None for VR) (%) |
|------------------|-------------|-------|----------------------------------|-------------------|---------------------------------------------------------------------------------------------------------------|------------------|---------------------------|---------------------------------------------|
| Lesotho          | 1990-1994   | 0     |                                  |                   |                                                                                                               |                  |                           |                                             |
| Lesotho          | 1995-1999   | 0     |                                  |                   |                                                                                                               |                  |                           |                                             |
| Lesotho          | 2000-2004   | 0     |                                  |                   |                                                                                                               |                  |                           |                                             |
| Lesotho          | 2005-2009   | 0     |                                  |                   |                                                                                                               |                  |                           |                                             |
| Lesotho          | 2010-2016   | 0     |                                  |                   |                                                                                                               |                  |                           |                                             |
| Liberia          | 1980-1984   | 1     | 2.2                              | 1984              | Infant and child mortality in two counties of Liberia: results of a survey in 1984 and trends since 1984      |                  | 47.8                      | 4.3                                         |
| Liberia          | 1985-1989   | 1     | 2.3                              | 1987              | Infant and child mortality in two counties of Liberia: results of a survey in 1988 and trends since 1984      |                  | 45.1                      | 4.2                                         |
| Liberia          | 1990-1994   | 1     | 3.6                              | 1990              | Application of the verbal autopsy during a clinical trial                                                     |                  | 29.2                      | 5.1                                         |
| Liberia          | 1995-1999   | 0     |                                  |                   |                                                                                                               |                  |                           |                                             |
| Liberia          | 2000-2004   | 0     |                                  |                   |                                                                                                               |                  |                           |                                             |
| Liberia          | 2005-2009   | 0     |                                  |                   |                                                                                                               |                  |                           |                                             |
| Liberia          | 2010-2016   | 0     |                                  |                   |                                                                                                               |                  |                           |                                             |
| Libya            | 1980-1984   | 0     |                                  |                   |                                                                                                               |                  |                           |                                             |
| Libya            | 1985-1989   | 0     |                                  |                   |                                                                                                               |                  |                           |                                             |
| Libya            | 1990-1994   | 0     |                                  |                   |                                                                                                               |                  |                           |                                             |
| Libya            | 1995-1999   | 0     |                                  |                   |                                                                                                               |                  |                           |                                             |
| Libya            | 2000-2004   | 0     |                                  |                   |                                                                                                               |                  |                           |                                             |
| Libya            | 2005-2009   | 1     | 3.6                              | 2008              | Vital Registration                                                                                            | 82.5             | 95.7                      |                                             |
| Libya            | 2010-2016   | 0     |                                  |                   |                                                                                                               |                  |                           |                                             |
| Lithuania        | 1980-1984   | 5     | 87.6                             | 1981              | Vital Registration                                                                                            | 99.2             | 11.7                      |                                             |
| Lithuania        | 1985-1989   | 5     | 92.2                             | 1988              | Vital Registration                                                                                            | 100.0            | 7.8                       |                                             |
| Lithuania        | 1990-1994   | 5     | 91.7                             | 1990              | Vital Registration                                                                                            | 100.0            | 8.3                       |                                             |
| Lithuania        | 1995-1999   | 5     | 94.7                             | 1997              | Vital Registration                                                                                            | 100.0            | 5.3                       |                                             |
| Lithuania        | 2000-2004   | 5     | 92.6                             | 2004              | Vital Registration                                                                                            | 100.0            | 7.4                       |                                             |
| Lithuania        | 2005-2009   | 5     | 93.1                             | 2009              | Vital Registration                                                                                            | 100.0            | 6.9                       |                                             |
| Lithuania        | 2010-2016   | 5     | 94.4                             | 2013              | Vital Registration                                                                                            | 100.0            | 5.6                       |                                             |
| Luxembourg       | 1980-1984   | 5     | 86.4                             | 1984              | Vital Registration                                                                                            | 100.0            | 13.6                      |                                             |
| Luxembourg       | 1985-1989   | 5     | 108.5                            | 1985              | Vital Registration                                                                                            | 100.0            | 13.3                      |                                             |
| Luxembourg       | 1990-1994   | 5     | 85.3                             | 1992              | Vital Registration                                                                                            | 100.0            | 14.7                      |                                             |
| Luxembourg       | 1995-1999   | 4     | 84.9                             | 1995              | Vital Registration                                                                                            | 99.3             | 14.6                      |                                             |
| Luxembourg       | 2000-2004   | 4     | 82.2                             | 2000              | Vital Registration                                                                                            | 100.0            | 17.8                      |                                             |
| Luxembourg       | 2005-2009   | 4     | 78.2                             | 2005              | Vital Registration                                                                                            | 100.0            | 21.8                      |                                             |
| Luxembourg       | 2010-2016   | 4     | 82.0                             | 2013              | Vital Registration                                                                                            | 99.2             | 17.3                      |                                             |
| Macedonia        | 1980-1984   | 0     |                                  |                   |                                                                                                               |                  |                           |                                             |
| Macedonia        | 1985-1989   | 0     |                                  |                   |                                                                                                               |                  |                           |                                             |
| Macedonia        | 1990-1994   | 4     | 80.1                             | 1994              | Vital Registration                                                                                            | 97.1             | 17.6                      |                                             |
| Macedonia        | 1995-1999   | 4     | 81.5                             | 1997              | Vital Registration                                                                                            | 98.2             | 17.6                      |                                             |
| Macedonia        | 2000-2004   | 4     | 81.6                             | 2003              | Vital Registration                                                                                            | 96.3             | 15.3                      |                                             |
| Macedonia        | 2005-2009   | 4     | 78.9                             | 2007              | Vital Registration                                                                                            | 98.2             | 19.7                      |                                             |
| Macedonia        | 2010-2016   | 4     | 74.6                             | 2012              | Vital Registration                                                                                            | 94.6             | 21.1                      |                                             |
| Madagascar       | 1980-1984   | 1     | 2.7                              | 1984              | Vital Registration                                                                                            | 4.9              | 45.0                      |                                             |
| Madagascar       | 1985-1989   | 1     | 3.3                              | 1986              | Vital Registration                                                                                            | 6.0              | 44.8                      |                                             |
| Madagascar       | 1990-1994   | 1     | 2.3                              | 1990              | Vital Registration                                                                                            | 4.1              | 45.0                      |                                             |
| Madagascar       | 1995-1999   | 1     | 2.2                              | 1995              | Vital Registration                                                                                            | 4.2              | 47.9                      |                                             |
| Madagascar       | 2000-2004   | 0     |                                  |                   |                                                                                                               |                  |                           |                                             |
| Madagascar       | 2005-2009   | 0     |                                  |                   |                                                                                                               |                  |                           |                                             |
| Madagascar       | 2010-2016   | 0     |                                  |                   |                                                                                                               |                  |                           |                                             |
| Malawi           | 1980-1984   | 0     |                                  |                   |                                                                                                               |                  |                           |                                             |
| Malawi           | 1985-1989   | 1     | 2.8                              | 1988              | Infant and second-year mortality in rural Malawi: causes and descriptive epidemiology                         |                  | 34.8                      | 4.3                                         |
| Malawi           | 1990-1994   | 0     |                                  |                   |                                                                                                               |                  |                           |                                             |
| Malawi           | 1995-1999   | 1     | 0.6                              | 1999              | Estimation of AIDS adult mortality by verbal autopsy in rural Malawi                                          |                  | 28.0                      | 0.8                                         |
| Malawi           | 2000-2004   | 1     | 2.2                              | 2004              | Declining child mortality in northern Malawi despite high rates of infection with HIV                         |                  | 31.6                      | 3.2                                         |
| Malawi           | 2005-2009   | 1     | 3.8                              | 2008              | Rates and causes of death in Chiradzulu District, Malawi, 2008: a key informant study                         |                  | 40.0                      | 6.4                                         |
| Malawi           | 2010-2016   | 1     | 0.4                              | 2011              | Africa, Asia, Oceania - INDEPTH Network Cause-Specific Mortality - Release 2014                               |                  | 94.3                      | 6.4                                         |
| Malaysia         | 1980-1984   | 2     | 19.3                             | 1982              | Vital Registration                                                                                            | 31.6             | 39.1                      |                                             |
| Malaysia         | 1985-1989   | 0     |                                  |                   |                                                                                                               |                  |                           |                                             |
| Malaysia         | 1990-1994   | 0     |                                  |                   |                                                                                                               |                  |                           |                                             |
| Malaysia         | 1995-1999   | 2     | 32.0                             | 1997              | Vital Registration                                                                                            | 46.4             | 31.0                      |                                             |
| Malaysia         | 2000-2004   | 3     | 36.5                             | 2004              | Vital Registration                                                                                            | 57.6             | 36.7                      |                                             |
| Malaysia         | 2005-2009   | 3     | 40.8                             | 2008              | Vital Registration                                                                                            | 61.1             | 33.3                      |                                             |
| Malaysia         | 2010-2016   | 0     |                                  |                   |                                                                                                               |                  |                           |                                             |
| Maldives         | 1980-1984   | 0     |                                  |                   |                                                                                                               |                  |                           |                                             |
| Maldives         | 1985-1989   | 0     |                                  |                   |                                                                                                               |                  |                           |                                             |
| Maldives         | 1990-1994   | 0     |                                  |                   |                                                                                                               |                  |                           |                                             |
| Maldives         | 1995-1999   | 0     |                                  |                   |                                                                                                               |                  |                           |                                             |
| Maldives         | 2000-2004   | 3     | 44.1                             | 2002              | Vital Registration                                                                                            | 100.0            | 55.9                      |                                             |
| Maldives         | 2005-2009   | 3     | 48.4                             | 2008              | Vital Registration                                                                                            | 100.0            | 51.6                      |                                             |
| Maldives         | 2010-2016   | 3     | 60.2                             | 2011              | Vital Registration                                                                                            | 100.0            | 39.8                      |                                             |
| Mali             | 1980-1984   | 1     | 4.3                              | 1981              | Vital Registration                                                                                            | 8.3              | 48.6                      |                                             |
| Mali             | 1985-1989   | 0     |                                  |                   |                                                                                                               |                  |                           |                                             |
| Mali             | 1990-1994   | 1     | 0.1                              | 1990              | Assessment of maternal mortality and late maternal mortality among a cohort of pregnant women in Bamako, Mali |                  | 81.3                      | 0.4                                         |
| Mali             | 1995-1999   | 0     |                                  |                   |                                                                                                               |                  |                           |                                             |
| Mali             | 2000-2004   | 0     |                                  |                   |                                                                                                               |                  |                           |                                             |
| Mali             | 2005-2009   | 0     |                                  |                   |                                                                                                               |                  |                           |                                             |
| Mali             | 2010-2016   | 0     |                                  |                   |                                                                                                               |                  |                           |                                             |
| Maha             | 1980-1984   | 4     | 81.0                             | 1982              | Vital Registration                                                                                            | 99.9             | 18.9                      |                                             |
| Maha             | 1985-1989   | 4     | 84.5                             | 1989              | Vital Registration                                                                                            | 96.6             | 12.6                      |                                             |
| Maha             | 1990-1994   | 5     | 88.4                             | 1992              | Vital Registration                                                                                            | 100.0            | 11.6                      |                                             |
| Maha             | 1995-1999   | 5     | 90.0                             | 1997              | Vital Registration                                                                                            | 100.0            | 10.0                      |                                             |
| Maha             | 2000-2004   | 5     | 89.0                             | 2002              | Vital Registration                                                                                            | 99.5             | 10.5                      |                                             |
| Maha             | 2005-2009   | 5     | 93.0                             | 2009              | Vital Registration                                                                                            | 100.0            | 7.0                       |                                             |
| Maha             | 2010-2016   | 5     | 90.9                             | 2014              | Vital Registration                                                                                            | 98.5             | 7.6                       |                                             |
| Marshall Islands | 1980-1984   | 0     |                                  |                   |                                                                                                               |                  |                           |                                             |
| Marshall Islands | 1985-1989   | 0     |                                  |                   |                                                                                                               |                  |                           |                                             |
| Marshall Islands | 1990-1994   | 0     |                                  |                   |                                                                                                               |                  |                           |                                             |
| Marshall Islands | 1995-1999   | 0     |                                  |                   |                                                                                                               |                  |                           |                                             |
| Marshall Islands | 2000-2004   | 0     |                                  |                   |                                                                                                               |                  |                           |                                             |
| Marshall Islands | 2005-2009   | 0     |                                  |                   |                                                                                                               |                  |                           |                                             |
| Marshall Islands | 2010-2016   | 0     |                                  |                   |                                                                                                               |                  |                           |                                             |
| Mauritania       | 1980-1984   | 0     |                                  |                   |                                                                                                               |                  |                           |                                             |
| Mauritania       | 1985-1989   | 0     |                                  |                   |                                                                                                               |                  |                           |                                             |
| Mauritania       | 1990-1994   | 0     |                                  |                   |                                                                                                               |                  |                           |                                             |
| Mauritania       | 1995-1999   | 0     |                                  |                   |                                                                                                               |                  |                           |                                             |
| Mauritania       | 2000-2004   | 0     |                                  |                   |                                                                                                               |                  |                           |                                             |
| Mauritania       | 2005-2009   | 0     |                                  |                   |                                                                                                               |                  |                           |                                             |
| Mauritania       | 2010-2016   | 0     |                                  |                   |                                                                                                               |                  |                           |                                             |
| Mauritius        | 1980-1984   | 4     | 73.8                             | 1984              | Vital Registration                                                                                            | 100.0            | 26.2                      |                                             |
| Mauritius        | 1985-1989   | 4     | 78.5                             | 1988              | Vital Registration                                                                                            | 100.0            | 21.5                      |                                             |
| Mauritius        | 1990-1994   | 4     | 78.7                             | 1991              | Vital Registration                                                                                            | 100.0            | 21.3                      |                                             |
| Mauritius        | 1995-1999   | 4     | 78.2                             | 1999              | Vital Registration                                                                                            | 100.0            | 21.8                      |                                             |
| Mauritius        | 2000-2004   | 4     | 83.0                             | 2003              | Vital Registration                                                                                            | 100.0            | 17.0                      |                                             |
| Mauritius        | 2005-2009   | 4     | 84.7                             | 2009              | Vital Registration                                                                                            | 100.0            | 15.2                      |                                             |
| Mauritius        | 2010-2016   | 5     | 85.3                             | 2014              | Vital Registration                                                                                            | 97.5             | 12.6                      |                                             |
| Mexico           | 1980-1984   | 4     | 65.2                             | 1983              | Vital Registration                                                                                            | 83.5             | 21.9                      |                                             |
| Mexico           | 1985-1989   | 4     | 71.9                             | 1989              | Vital Registration                                                                                            | 87.4             | 17.7                      |                                             |
| Mexico           | 1990-1994   | 4     | 72.7                             | 1990              | Vital Registration                                                                                            | 87.8             | 17.2                      |                                             |
| Mexico           | 1995-1999   | 4     | 76.7                             | 1999              | Vital Registration                                                                                            | 88.0             | 12.9                      |                                             |
| Mexico           | 2000-2004   | 4     | 79.4                             | 2004              | Vital Registration                                                                                            | 90.0             | 11.8                      |                                             |
| Mexico           | 2005-2009   | 4     | 81.7                             | 2009              | Vital Registration                                                                                            | 93.0             | 12.2                      |                                             |
| Mexico           | 2010-2016   | 5     | 88.1                             | 2012              | Vital Registration                                                                                            | 100.0            | 11.9                      |                                             |
| Moldova          | 1980-1984   | 4     | 83.9                             | 1981              | Vital Registration                                                                                            | 96.3             | 12.9                      |                                             |
| Moldova          | 1985-1989   | 5     | 87.1                             | 1985              | Vital Registration                                                                                            | 97.7             | 10.8                      |                                             |



Appendix Table 17. Underlying indicators for percent well-certified for data source with maximum percent well certified in each 5-year time interval for 195 countries, 1980-2016.

| Location                 | Time Window | Stars | Percent Well-Certified (PWC) (%) | Max PWC Data Year | Max PWC Data Source                                                                                                                                                         | Completeness (%) | Percent Major Garbage (%) | Verbal Autopsy Adjustment (None for VR) (%) |
|--------------------------|-------------|-------|----------------------------------|-------------------|-----------------------------------------------------------------------------------------------------------------------------------------------------------------------------|------------------|---------------------------|---------------------------------------------|
| Moldova                  | 1990-1994   | 4     | 77.2                             | 1991              | Vital Registration                                                                                                                                                          | 94.3             | 18.1                      |                                             |
| Moldova                  | 1995-1999   | 4     | 84.8                             | 1996              | Vital Registration                                                                                                                                                          | 94.9             | 10.7                      |                                             |
| Moldova                  | 2000-2004   | 5     | 90.0                             | 2003              | Vital Registration                                                                                                                                                          | 92.5             | 3.4                       |                                             |
| Moldova                  | 2005-2009   | 5     | 89.6                             | 2005              | Vital Registration                                                                                                                                                          | 92.5             | 3.1                       |                                             |
| Moldova                  | 2010-2016   | 5     | 90.3                             | 2014              | Vital Registration                                                                                                                                                          | 93.1             | 3.0                       |                                             |
| Mongolia                 | 1980-1984   | 0     |                                  |                   |                                                                                                                                                                             |                  |                           |                                             |
| Mongolia                 | 1985-1989   | 0     |                                  |                   |                                                                                                                                                                             |                  |                           |                                             |
| Mongolia                 | 1990-1994   | 3     | 62.9                             | 1994              | Vital Registration                                                                                                                                                          | 79.2             | 20.6                      |                                             |
| Mongolia                 | 1995-1999   | 0     |                                  |                   |                                                                                                                                                                             |                  |                           |                                             |
| Mongolia                 | 2000-2004   | 1     | 3.3                              | 2004              | Vital Registration                                                                                                                                                          | 79.9             | 95.8                      |                                             |
| Mongolia                 | 2005-2009   | 1     | 4.6                              | 2008              | Vital Registration                                                                                                                                                          | 78.8             | 94.1                      |                                             |
| Mongolia                 | 2010-2016   | 4     | 81.4                             | 2010              | Vital Registration                                                                                                                                                          | 86.9             | 6.2                       |                                             |
| Montenegro               | 1980-1984   | 0     |                                  |                   |                                                                                                                                                                             |                  |                           |                                             |
| Montenegro               | 1985-1989   | 0     |                                  |                   |                                                                                                                                                                             |                  |                           |                                             |
| Montenegro               | 1990-1994   | 0     |                                  |                   |                                                                                                                                                                             |                  |                           |                                             |
| Montenegro               | 1995-1999   | 0     |                                  |                   |                                                                                                                                                                             |                  |                           |                                             |
| Montenegro               | 2000-2004   | 4     | 70.6                             | 2004              | Vital Registration                                                                                                                                                          | 100.0            | 29.4                      |                                             |
| Montenegro               | 2005-2009   | 4     | 72.9                             | 2006              | Vital Registration                                                                                                                                                          | 100.0            | 27.1                      |                                             |
| Montenegro               | 2010-2016   | 0     |                                  |                   |                                                                                                                                                                             |                  |                           |                                             |
| Morocco                  | 1980-1984   | 0     |                                  |                   |                                                                                                                                                                             |                  |                           |                                             |
| Morocco                  | 1985-1989   | 2     | 17.0                             | 1988              | Morocco National Survey on Causes and Circumstances of Infant and Child Deaths 1985-1989                                                                                    |                  | 25.7                      | 22.8                                        |
| Morocco                  | 1990-1994   | 0     |                                  |                   |                                                                                                                                                                             |                  |                           |                                             |
| Morocco                  | 1995-1999   | 0     |                                  |                   |                                                                                                                                                                             |                  |                           |                                             |
| Morocco                  | 2000-2004   | 0     |                                  |                   |                                                                                                                                                                             |                  |                           |                                             |
| Morocco                  | 2005-2009   | 3     | 37.9                             | 2005              | Vital Registration                                                                                                                                                          | 83.4             | 54.6                      |                                             |
| Morocco                  | 2010-2016   | 2     | 14.3                             | 2010              | Vital Registration                                                                                                                                                          | 30.8             | 53.6                      |                                             |
| Mozambique               | 1980-1984   | 0     |                                  |                   |                                                                                                                                                                             |                  |                           |                                             |
| Mozambique               | 1985-1989   | 0     |                                  |                   |                                                                                                                                                                             |                  |                           |                                             |
| Mozambique               | 1990-1994   | 0     |                                  |                   |                                                                                                                                                                             |                  |                           |                                             |
| Mozambique               | 1995-1999   | 1     | 0.1                              | 1996              | Quality of registration of maternal deaths in Mozambique: a community-based study in rural and urban areas                                                                  |                  | 81.3                      | 0.4                                         |
| Mozambique               | 2000-2004   | 1     | 7.0                              | 2001              | Vital Registration                                                                                                                                                          | 8.8              | 20.8                      |                                             |
| Mozambique               | 2005-2009   | 3     | 56.6                             | 2007              | Mozambique National Survey on the Causes of Death 2007-2008                                                                                                                 |                  | 11.6                      | 64.0                                        |
| Mozambique               | 2010-2016   | 0     |                                  |                   |                                                                                                                                                                             |                  |                           |                                             |
| Myanmar                  | 1980-1984   | 0     |                                  |                   |                                                                                                                                                                             |                  |                           |                                             |
| Myanmar                  | 1985-1989   | 0     |                                  |                   |                                                                                                                                                                             |                  |                           |                                             |
| Myanmar                  | 1990-1994   | 0     |                                  |                   |                                                                                                                                                                             |                  |                           |                                             |
| Myanmar                  | 1995-1999   | 0     |                                  |                   |                                                                                                                                                                             |                  |                           |                                             |
| Myanmar                  | 2000-2004   | 0     |                                  |                   |                                                                                                                                                                             |                  |                           |                                             |
| Myanmar                  | 2005-2009   | 1     | 2.8                              | 2007              | Case of Death Verification Study in Myanmar                                                                                                                                 |                  | 54.8                      | 6.3                                         |
| Myanmar                  | 2010-2016   | 0     |                                  |                   |                                                                                                                                                                             |                  |                           |                                             |
| Namibia                  | 1980-1984   | 0     |                                  |                   |                                                                                                                                                                             |                  |                           |                                             |
| Namibia                  | 1985-1989   | 0     |                                  |                   |                                                                                                                                                                             |                  |                           |                                             |
| Namibia                  | 1990-1994   | 0     |                                  |                   |                                                                                                                                                                             |                  |                           |                                             |
| Namibia                  | 1995-1999   | 0     |                                  |                   |                                                                                                                                                                             |                  |                           |                                             |
| Namibia                  | 2000-2004   | 0     |                                  |                   |                                                                                                                                                                             |                  |                           |                                             |
| Namibia                  | 2005-2009   | 0     |                                  |                   |                                                                                                                                                                             |                  |                           |                                             |
| Namibia                  | 2010-2016   | 0     |                                  |                   |                                                                                                                                                                             |                  |                           |                                             |
| Nepal                    | 1980-1984   | 1     | 2.9                              | 1984              | Impact of a pilot acute respiratory infection (ARI) control programme in a rural community of the hill region of Nepal                                                      |                  | 17.2                      | 3.5                                         |
| Nepal                    | 1985-1989   | 1     | 2.7                              | 1987              | Reduction in total under-five mortality in western Nepal through community-based antimicrobial treatment of pneumonia                                                       |                  | 19.2                      | 3.3                                         |
| Nepal                    | 1990-1994   | 0     |                                  |                   |                                                                                                                                                                             |                  |                           |                                             |
| Nepal                    | 1995-1999   | 1     | 0.6                              | 1999              | Evaluation of neonatal verbal autopsy using physician review versus algorithm-based cause-of-death assignment in rural Nepal                                                |                  | 43.7                      | 1.0                                         |
| Nepal                    | 2000-2004   | 1     | 0.6                              | 2003              | Effect of daily zinc supplementation on child mortality in southern Nepal: a community-based, cluster randomised, placebo-controlled trial                                  |                  | 31.8                      | 0.9                                         |
| Nepal                    | 2005-2009   | 1     | 8.9                              | 2006              | Nepal Demographic and Health Survey 2006                                                                                                                                    |                  | 40.3                      | 14.9                                        |
| Nepal                    | 2010-2016   | 0     |                                  |                   |                                                                                                                                                                             |                  |                           |                                             |
| Netherlands              | 1980-1984   | 5     | 88.2                             | 1981              | Vital Registration                                                                                                                                                          | 99.9             | 11.7                      |                                             |
| Netherlands              | 1985-1989   | 5     | 85.8                             | 1987              | Vital Registration                                                                                                                                                          | 98.6             | 13.0                      |                                             |
| Netherlands              | 1990-1994   | 4     | 84.9                             | 1990              | Vital Registration                                                                                                                                                          | 100.0            | 15.1                      |                                             |
| Netherlands              | 1995-1999   | 4     | 84.0                             | 1996              | Vital Registration                                                                                                                                                          | 100.0            | 16.0                      |                                             |
| Netherlands              | 2000-2004   | 4     | 82.3                             | 2003              | Vital Registration                                                                                                                                                          | 100.0            | 17.7                      |                                             |
| Netherlands              | 2005-2009   | 4     | 83.3                             | 2006              | Vital Registration                                                                                                                                                          | 100.0            | 16.7                      |                                             |
| Netherlands              | 2010-2016   | 4     | 83.3                             | 2012              | Vital Registration                                                                                                                                                          | 100.0            | 16.7                      |                                             |
| New Zealand              | 1980-1984   | 5     | 95.2                             | 1980              | Vital Registration                                                                                                                                                          | 100.0            | 4.8                       |                                             |
| New Zealand              | 1985-1989   | 5     | 95.0                             | 1985              | Vital Registration                                                                                                                                                          | 100.0            | 5.0                       |                                             |
| New Zealand              | 1990-1994   | 5     | 94.7                             | 1992              | Vital Registration                                                                                                                                                          | 100.0            | 5.3                       |                                             |
| New Zealand              | 1995-1999   | 5     | 96.7                             | 1999              | Vital Registration                                                                                                                                                          | 100.0            | 3.3                       |                                             |
| New Zealand              | 2000-2004   | 5     | 96.4                             | 2004              | Vital Registration                                                                                                                                                          | 100.0            | 3.6                       |                                             |
| New Zealand              | 2005-2009   | 5     | 96.3                             | 2006              | Vital Registration                                                                                                                                                          | 100.0            | 3.7                       |                                             |
| New Zealand              | 2010-2016   | 5     | 95.7                             | 2012              | Vital Registration                                                                                                                                                          | 100.0            | 4.3                       |                                             |
| Nicaragua                | 1980-1984   | 0     |                                  |                   |                                                                                                                                                                             |                  |                           |                                             |
| Nicaragua                | 1985-1989   | 3     | 55.8                             | 1988              | Vital Registration                                                                                                                                                          | 71.2             | 21.7                      |                                             |
| Nicaragua                | 1990-1994   | 3     | 59.4                             | 1990              | Vital Registration                                                                                                                                                          | 74.9             | 20.7                      |                                             |
| Nicaragua                | 1995-1999   | 4     | 66.1                             | 1998              | Vital Registration                                                                                                                                                          | 77.9             | 15.1                      |                                             |
| Nicaragua                | 2000-2004   | 4     | 71.7                             | 2004              | Vital Registration                                                                                                                                                          | 80.9             | 11.3                      |                                             |
| Nicaragua                | 2005-2009   | 4     | 78.7                             | 2008              | Vital Registration                                                                                                                                                          | 90.2             | 12.7                      |                                             |
| Nicaragua                | 2010-2016   | 4     | 84.9                             | 2013              | Vital Registration                                                                                                                                                          | 93.4             | 9.1                       |                                             |
| Niger                    | 1980-1984   | 0     |                                  |                   |                                                                                                                                                                             |                  |                           |                                             |
| Niger                    | 1985-1989   | 0     |                                  |                   |                                                                                                                                                                             |                  |                           |                                             |
| Niger                    | 1990-1994   | 0     |                                  |                   |                                                                                                                                                                             |                  |                           |                                             |
| Niger                    | 1995-1999   | 0     |                                  |                   |                                                                                                                                                                             |                  |                           |                                             |
| Niger                    | 2000-2004   | 0     |                                  |                   |                                                                                                                                                                             |                  |                           |                                             |
| Niger                    | 2005-2009   | 3     | 35.9                             | 2008              | Direct estimates of national neonatal and child cause-specific mortality proportions in Niger by expert algorithm and physician-coded analysis of verbal autopsy interviews |                  | 8.9                       | 39.4                                        |
| Niger                    | 2010-2016   | 0     |                                  |                   |                                                                                                                                                                             |                  |                           |                                             |
| Nigeria                  | 1980-1984   | 0     |                                  |                   |                                                                                                                                                                             |                  |                           |                                             |
| Nigeria                  | 1985-1989   | 0     |                                  |                   |                                                                                                                                                                             |                  |                           |                                             |
| Nigeria                  | 1990-1994   | 1     | 4.0                              | 1991              | Community-based surveillance of paediatric deaths in Cross River State, Nigeria                                                                                             |                  | 9.7                       | 4.4                                         |
| Nigeria                  | 1995-1999   | 0     |                                  |                   |                                                                                                                                                                             |                  |                           |                                             |
| Nigeria                  | 2000-2004   | 0     |                                  |                   |                                                                                                                                                                             |                  |                           |                                             |
| Nigeria                  | 2005-2009   | 1     | 0.1                              | 2007              | Vital Registration                                                                                                                                                          | 1.5              | 91.6                      |                                             |
| Nigeria                  | 2010-2016   | 1     | 3.8                              | 2012              | Health & demographic surveillance system profile: the Nafiche Health and Demographic Surveillance System, Northern Nigeria (Nafiche HDSS)                                   |                  | 15.0                      | 4.4                                         |
| North Korea              | 1980-1984   | 0     |                                  |                   |                                                                                                                                                                             |                  |                           |                                             |
| North Korea              | 1985-1989   | 0     |                                  |                   |                                                                                                                                                                             |                  |                           |                                             |
| North Korea              | 1990-1994   | 0     |                                  |                   |                                                                                                                                                                             |                  |                           |                                             |
| North Korea              | 1995-1999   | 0     |                                  |                   |                                                                                                                                                                             |                  |                           |                                             |
| North Korea              | 2000-2004   | 0     |                                  |                   |                                                                                                                                                                             |                  |                           |                                             |
| North Korea              | 2005-2009   | 0     |                                  |                   |                                                                                                                                                                             |                  |                           |                                             |
| North Korea              | 2010-2016   | 0     |                                  |                   |                                                                                                                                                                             |                  |                           |                                             |
| Northern Mariana Islands | 1980-1984   | 0     |                                  |                   |                                                                                                                                                                             |                  |                           |                                             |
| Northern Mariana Islands | 1985-1989   | 0     |                                  |                   |                                                                                                                                                                             |                  |                           |                                             |
| Northern Mariana Islands | 1990-1994   | 0     |                                  |                   |                                                                                                                                                                             |                  |                           |                                             |
| Northern Mariana Islands | 1995-1999   | 4     | 75.3                             | 1998              | Vital Registration                                                                                                                                                          | 100.0            | 24.7                      |                                             |
| Northern Mariana Islands | 2000-2004   | 4     | 75.3                             | 2001              | Vital Registration                                                                                                                                                          | 87.0             | 13.5                      |                                             |
| Northern Mariana Islands | 2005-2009   | 4     | 72.3                             | 2005              | Vital Registration                                                                                                                                                          | 96.1             | 24.7                      |                                             |
| Northern Mariana Islands | 2010-2016   | 3     | 55.2                             | 2010              | Vital Registration                                                                                                                                                          | 72.9             | 25.3                      |                                             |
| Norway                   | 1980-1984   | 4     | 78.6                             | 1981              | Vital Registration                                                                                                                                                          | 100.0            | 21.4                      |                                             |

Appendix Table 17. Underlying indicators for percent well-certified for data source with maximum percent well certified in each 5-year time interval for 195 countries, 1980-2016.

| Location         | Time Window | Stars | Percent Well-Certified (PWC) (%) | Max PWC Data Year | Max PWC Data Source                                                                                                                                                 | Completeness (%) | Percent Major Garbage (%) | Verbal Autopsy Adjustment (None for VR) (%) |
|------------------|-------------|-------|----------------------------------|-------------------|---------------------------------------------------------------------------------------------------------------------------------------------------------------------|------------------|---------------------------|---------------------------------------------|
| Norway           | 1985-1989   | 5     | 89.2                             | 1988              | Vital Registration                                                                                                                                                  | 100.0            | 10.8                      |                                             |
| Norway           | 1990-1994   | 5     | 88.4                             | 1990              | Vital Registration                                                                                                                                                  | 100.0            | 11.6                      |                                             |
| Norway           | 1995-1999   | 5     | 88.3                             | 1997              | Vital Registration                                                                                                                                                  | 100.0            | 11.7                      |                                             |
| Norway           | 2000-2004   | 5     | 86.4                             | 2000              | Vital Registration                                                                                                                                                  | 100.0            | 13.6                      |                                             |
| Norway           | 2005-2009   | 4     | 84.2                             | 2006              | Vital Registration                                                                                                                                                  | 100.0            | 15.8                      |                                             |
| Norway           | 2010-2016   | 4     | 83.0                             | 2011              | Vital Registration                                                                                                                                                  | 100.0            | 17.0                      |                                             |
| Oman             | 1980-1984   | 0     |                                  |                   |                                                                                                                                                                     |                  |                           |                                             |
| Oman             | 1985-1989   | 0     |                                  |                   |                                                                                                                                                                     |                  |                           |                                             |
| Oman             | 1990-1994   | 0     |                                  |                   |                                                                                                                                                                     |                  |                           |                                             |
| Oman             | 1995-1999   | 0     |                                  |                   |                                                                                                                                                                     |                  |                           |                                             |
| Oman             | 2000-2004   | 0     |                                  |                   |                                                                                                                                                                     |                  |                           |                                             |
| Oman             | 2005-2009   | 4     | 71.0                             | 2007              | Vital Registration                                                                                                                                                  | 85.0             | 16.5                      |                                             |
| Oman             | 2010-2016   | 2     | 33.0                             | 2010              | Vital Registration                                                                                                                                                  | 80.2             | 58.8                      |                                             |
| Pakistan         | 1980-1984   | 0     |                                  |                   |                                                                                                                                                                     |                  |                           |                                             |
| Pakistan         | 1985-1989   | 1     | 2.9                              | 1986              | Acute respiratory infections in children: a case management intervention in Abbottabad District, Pakistan                                                           |                  | 13.0                      | 3.3                                         |
| Pakistan         | 1990-1994   | 1     | 1.4                              | 1994              | Time to focus child survival programmes on the newborn: assessment of levels and causes of infant mortality in rural Pakistan                                       |                  | 19.9                      | 1.8                                         |
| Pakistan         | 1995-1999   | 0     |                                  |                   |                                                                                                                                                                     |                  |                           |                                             |
| Pakistan         | 2000-2004   | 1     | 0.8                              | 2003              | Impact of a community-based perinatal and newborn preventive care package on perinatal and neonatal mortality in a remote mountainous district in Northern Pakistan |                  | 0.0                       | 0.8                                         |
| Pakistan         | 2005-2009   | 2     | 11.5                             | 2006              | Pakistan Demographic and Health Survey 2006-2007                                                                                                                    |                  | 33.0                      | 17.2                                        |
| Pakistan         | 2010-2016   | 1     | 0.0                              | 2010              | To determine the probable causes of death in an urban shah community of Pakistan among adults 18 years and above by verbal autopsy                                  |                  | 99.0                      | 4.5                                         |
| Palestine        | 1980-1984   | 0     |                                  |                   |                                                                                                                                                                     |                  |                           |                                             |
| Palestine        | 1985-1989   | 0     |                                  |                   |                                                                                                                                                                     |                  |                           |                                             |
| Palestine        | 1990-1994   | 0     |                                  |                   |                                                                                                                                                                     |                  |                           |                                             |
| Palestine        | 1995-1999   | 2     | 29.0                             | 1999              | Vital Registration                                                                                                                                                  | 46.1             | 37.1                      |                                             |
| Palestine        | 2000-2004   | 2     | 29.1                             | 2004              | Vital Registration                                                                                                                                                  | 43.4             | 33.1                      |                                             |
| Palestine        | 2005-2009   | 2     | 28.2                             | 2009              | Vital Registration                                                                                                                                                  | 40.9             | 30.9                      |                                             |
| Palestine        | 2010-2016   | 2     | 29.7                             | 2011              | Vital Registration                                                                                                                                                  | 41.8             | 28.9                      |                                             |
| Panama           | 1980-1984   | 4     | 69.2                             | 1983              | Vital Registration                                                                                                                                                  | 93.7             | 26.2                      |                                             |
| Panama           | 1985-1989   | 4     | 71.6                             | 1987              | Vital Registration                                                                                                                                                  | 93.1             | 23.1                      |                                             |
| Panama           | 1990-1994   | 0     |                                  |                   |                                                                                                                                                                     |                  |                           |                                             |
| Panama           | 1995-1999   | 4     | 79.0                             | 1999              | Vital Registration                                                                                                                                                  | 94.6             | 16.5                      |                                             |
| Panama           | 2000-2004   | 4     | 82.2                             | 2003              | Vital Registration                                                                                                                                                  | 97.1             | 15.4                      |                                             |
| Panama           | 2005-2009   | 4     | 84.1                             | 2005              | Vital Registration                                                                                                                                                  | 98.5             | 14.6                      |                                             |
| Panama           | 2010-2016   | 4     | 84.1                             | 2014              | Vital Registration                                                                                                                                                  | 100.0            | 15.9                      |                                             |
| Papua New Guinea | 1980-1984   | 1     | 8.2                              | 1980              | Vital Registration                                                                                                                                                  | 9.9              | 17.6                      |                                             |
| Papua New Guinea | 1985-1989   | 1     | 3.4                              | 1985              | Mortality rates and the utilization of health services during terminal illness in the Asaro Valley, Eastern Highlands Province, Papua New Guinea                    |                  | 46.7                      | 6.4                                         |
| Papua New Guinea | 1990-1994   | 0     |                                  |                   |                                                                                                                                                                     |                  |                           |                                             |
| Papua New Guinea | 1995-1999   | 0     |                                  |                   |                                                                                                                                                                     |                  |                           |                                             |
| Papua New Guinea | 2000-2004   | 0     |                                  |                   |                                                                                                                                                                     |                  |                           |                                             |
| Papua New Guinea | 2005-2009   | 0     |                                  |                   |                                                                                                                                                                     |                  |                           |                                             |
| Papua New Guinea | 2010-2016   | 0     |                                  |                   |                                                                                                                                                                     |                  |                           |                                             |
| Paraguay         | 1980-1984   | 3     | 55.1                             | 1980              | Vital Registration                                                                                                                                                  | 85.4             | 35.5                      |                                             |
| Paraguay         | 1985-1989   | 3     | 51.4                             | 1989              | Vital Registration                                                                                                                                                  | 78.1             | 34.2                      |                                             |
| Paraguay         | 1990-1994   | 3     | 59.0                             | 1994              | Vital Registration                                                                                                                                                  | 79.9             | 26.1                      |                                             |
| Paraguay         | 1995-1999   | 3     | 62.6                             | 1996              | Vital Registration                                                                                                                                                  | 84.7             | 26.1                      |                                             |
| Paraguay         | 2000-2004   | 3     | 60.0                             | 2004              | Vital Registration                                                                                                                                                  | 83.1             | 27.8                      |                                             |
| Paraguay         | 2005-2009   | 3     | 62.6                             | 2009              | Vital Registration                                                                                                                                                  | 82.5             | 24.2                      |                                             |
| Paraguay         | 2010-2016   | 4     | 65.7                             | 2013              | Vital Registration                                                                                                                                                  | 83.1             | 20.9                      |                                             |
| Peru             | 1980-1984   | 3     | 58.9                             | 1980              | Vital Registration                                                                                                                                                  | 76.6             | 23.1                      |                                             |
| Peru             | 1985-1989   | 2     | 34.4                             | 1986              | Vital Registration                                                                                                                                                  | 69.1             | 50.2                      |                                             |
| Peru             | 1990-1994   | 3     | 36.5                             | 1992              | Vital Registration                                                                                                                                                  | 67.8             | 46.1                      |                                             |
| Peru             | 1995-1999   | 3     | 48.2                             | 1999              | Vital Registration                                                                                                                                                  | 75.7             | 36.4                      |                                             |
| Peru             | 2000-2004   | 3     | 60.3                             | 2004              | Vital Registration                                                                                                                                                  | 85.8             | 29.7                      |                                             |
| Peru             | 2005-2009   | 3     | 60.2                             | 2008              | Vital Registration                                                                                                                                                  | 80.2             | 25.0                      |                                             |
| Peru             | 2010-2016   | 3     | 60.4                             | 2010              | Vital Registration                                                                                                                                                  | 81.1             | 25.6                      |                                             |
| Philippines      | 1980-1984   | 4     | 71.7                             | 1980              | Vital Registration                                                                                                                                                  | 90.7             | 20.9                      |                                             |
| Philippines      | 1985-1989   | 4     | 73.8                             | 1985              | Vital Registration                                                                                                                                                  | 93.6             | 21.1                      |                                             |
| Philippines      | 1990-1994   | 4     | 65.8                             | 1990              | Vital Registration                                                                                                                                                  | 85.3             | 22.8                      |                                             |
| Philippines      | 1995-1999   | 4     | 65.9                             | 1998              | Vital Registration                                                                                                                                                  | 84.5             | 22.0                      |                                             |
| Philippines      | 2000-2004   | 4     | 72.6                             | 2002              | Vital Registration                                                                                                                                                  | 85.0             | 14.6                      |                                             |
| Philippines      | 2005-2009   | 4     | 72.4                             | 2009              | Vital Registration                                                                                                                                                  | 85.2             | 15.0                      |                                             |
| Philippines      | 2010-2016   | 4     | 71.8                             | 2011              | Vital Registration                                                                                                                                                  | 84.6             | 15.1                      |                                             |
| Poland           | 1980-1984   | 3     | 62.5                             | 1980              | Vital Registration                                                                                                                                                  | 100.0            | 37.5                      |                                             |
| Poland           | 1985-1989   | 3     | 60.3                             | 1986              | Vital Registration                                                                                                                                                  | 100.0            | 39.7                      |                                             |
| Poland           | 1990-1994   | 3     | 60.4                             | 1994              | Vital Registration                                                                                                                                                  | 99.8             | 39.5                      |                                             |
| Poland           | 1995-1999   | 4     | 71.6                             | 1999              | Vital Registration                                                                                                                                                  | 100.0            | 28.4                      |                                             |
| Poland           | 2000-2004   | 4     | 74.2                             | 2002              | Vital Registration                                                                                                                                                  | 100.0            | 25.8                      |                                             |
| Poland           | 2005-2009   | 4     | 73.6                             | 2005              | Vital Registration                                                                                                                                                  | 100.0            | 26.4                      |                                             |
| Poland           | 2010-2016   | 4     | 71.9                             | 2011              | Vital Registration                                                                                                                                                  | 98.8             | 27.2                      |                                             |
| Portugal         | 1980-1984   | 4     | 76.8                             | 1984              | Vital Registration                                                                                                                                                  | 100.0            | 23.2                      |                                             |
| Portugal         | 1985-1989   | 4     | 77.1                             | 1985              | Vital Registration                                                                                                                                                  | 100.0            | 22.9                      |                                             |
| Portugal         | 1990-1994   | 4     | 76.1                             | 1991              | Vital Registration                                                                                                                                                  | 100.0            | 23.0                      |                                             |
| Portugal         | 1995-1999   | 4     | 74.2                             | 1996              | Vital Registration                                                                                                                                                  | 99.7             | 25.6                      |                                             |
| Portugal         | 2000-2004   | 4     | 78.8                             | 2002              | Vital Registration                                                                                                                                                  | 99.5             | 20.8                      |                                             |
| Portugal         | 2005-2009   | 4     | 77.5                             | 2009              | Vital Registration                                                                                                                                                  | 99.5             | 22.2                      |                                             |
| Portugal         | 2010-2016   | 4     | 79.8                             | 2014              | Vital Registration                                                                                                                                                  | 97.5             | 18.1                      |                                             |
| Puerto Rico      | 1980-1984   | 4     | 77.1                             | 1981              | Vital Registration                                                                                                                                                  | 100.0            | 22.9                      |                                             |
| Puerto Rico      | 1985-1989   | 4     | 74.6                             | 1986              | Vital Registration                                                                                                                                                  | 100.0            | 25.4                      |                                             |
| Puerto Rico      | 1990-1994   | 4     | 79.9                             | 1994              | Vital Registration                                                                                                                                                  | 95.7             | 16.6                      |                                             |
| Puerto Rico      | 1995-1999   | 4     | 83.4                             | 1999              | Vital Registration                                                                                                                                                  | 100.0            | 16.6                      |                                             |
| Puerto Rico      | 2000-2004   | 4     | 84.0                             | 2004              | Vital Registration                                                                                                                                                  | 100.0            | 16.0                      |                                             |
| Puerto Rico      | 2005-2009   | 4     | 84.0                             | 2008              | Vital Registration                                                                                                                                                  | 100.0            | 16.0                      |                                             |
| Puerto Rico      | 2010-2016   | 4     | 84.7                             | 2012              | Vital Registration                                                                                                                                                  | 100.0            | 15.3                      |                                             |
| Qatar            | 1980-1984   | 1     | 8.4                              | 1984              | Vital Registration                                                                                                                                                  | 61.2             | 86.3                      |                                             |
| Qatar            | 1985-1989   | 1     | 10.0                             | 1985              | Vital Registration                                                                                                                                                  | 72.1             | 86.2                      |                                             |
| Qatar            | 1990-1994   | 0     |                                  |                   |                                                                                                                                                                     |                  |                           |                                             |
| Qatar            | 1995-1999   | 3     | 51.6                             | 1995              | Vital Registration                                                                                                                                                  | 73.8             | 30.1                      |                                             |
| Qatar            | 2000-2004   | 3     | 48.2                             | 2001              | Vital Registration                                                                                                                                                  | 74.4             | 35.2                      |                                             |
| Qatar            | 2005-2009   | 3     | 56.2                             | 2006              | Vital Registration                                                                                                                                                  | 82.6             | 32.0                      |                                             |
| Qatar            | 2010-2016   | 3     | 44.0                             | 2014              | Vital Registration                                                                                                                                                  | 72.7             | 39.4                      |                                             |
| Romania          | 1980-1984   | 4     | 77.4                             | 1980              | Vital Registration                                                                                                                                                  | 100.0            | 22.4                      |                                             |
| Romania          | 1985-1989   | 4     | 78.5                             | 1989              | Vital Registration                                                                                                                                                  | 100.0            | 21.5                      |                                             |
| Romania          | 1990-1994   | 4     | 83.3                             | 1994              | Vital Registration                                                                                                                                                  | 99.6             | 16.4                      |                                             |
| Romania          | 1995-1999   | 4     | 84.8                             | 1999              | Vital Registration                                                                                                                                                  | 100.0            | 15.2                      |                                             |
| Romania          | 2000-2004   | 5     | 85.5                             | 2004              | Vital Registration                                                                                                                                                  | 99.4             | 14.0                      |                                             |
| Romania          | 2005-2009   | 5     | 86.2                             | 2006              | Vital Registration                                                                                                                                                  | 100.0            | 13.8                      |                                             |
| Romania          | 2010-2016   | 5     | 85.5                             | 2010              | Vital Registration                                                                                                                                                  | 100.0            | 14.5                      |                                             |
| Russia           | 1980-1984   | 4     | 81.6                             | 1981              | Vital Registration                                                                                                                                                  | 99.4             | 18.0                      |                                             |
| Russia           | 1985-1989   | 5     | 88.4                             | 1989              | Vital Registration                                                                                                                                                  | 98.2             | 10.0                      |                                             |
| Russia           | 1990-1994   | 5     | 87.8                             | 1990              | Vital Registration                                                                                                                                                  | 99.3             | 11.6                      |                                             |
| Russia           | 1995-1999   | 4     | 84.6                             | 1999              | Vital Registration                                                                                                                                                  | 99.9             | 15.3                      |                                             |
| Russia           | 2000-2004   | 5     | 87.4                             | 2003              | Vital Registration                                                                                                                                                  | 100.0            | 12.4                      |                                             |
| Russia           | 2005-2009   | 5     | 88.9                             | 2009              | Vital Registration                                                                                                                                                  | 100.0            | 11.1                      |                                             |
| Russia           | 2010-2016   | 5     | 88.4                             | 2010              | Vital Registration                                                                                                                                                  | 100.0            | 11.6                      |                                             |
| Rwanda           | 1980-1984   | 0     |                                  |                   |                                                                                                                                                                     |                  |                           |                                             |
| Rwanda           | 1985-1989   | 0     |                                  |                   |                                                                                                                                                                     |                  |                           |                                             |
| Rwanda           | 1990-1994   | 0     |                                  |                   |                                                                                                                                                                     |                  |                           |                                             |
| Rwanda           | 1995-1999   | 0     |                                  |                   |                                                                                                                                                                     |                  |                           |                                             |
| Rwanda           | 2000-2004   | 0     |                                  |                   |                                                                                                                                                                     |                  |                           |                                             |
| Rwanda           | 2005-2009   | 1     | 2.5                              | 2007              | Rwanda Child Verbal Autopsy Study 2008                                                                                                                              |                  | 11.6                      | 2.8                                         |
| Rwanda           | 2010-2016   | 0     |                                  |                   |                                                                                                                                                                     |                  |                           |                                             |

Appendix Table 17. Underlying indicators for percent well-certified for data source with maximum percent well certified in each 5-year time interval for 195 countries, 1980-2016.

| Location                         | Time Window | Stars | Percent Well-Certified (PWC) (%) | Max PWC Data Year | Max PWC Data Source                                                                                                                               | Completeness (%) | Percent Major Garbage (%) | Verbal Autopsy Adjustment (None for VR) (%) |
|----------------------------------|-------------|-------|----------------------------------|-------------------|---------------------------------------------------------------------------------------------------------------------------------------------------|------------------|---------------------------|---------------------------------------------|
| Saint Lucia                      | 1980-1984   | 4     | 69.3                             | 1983              | Vital Registration                                                                                                                                | 100.0            | 30.7                      |                                             |
| Saint Lucia                      | 1985-1989   | 4     | 66.2                             | 1987              | Vital Registration                                                                                                                                | 100.0            | 33.8                      |                                             |
| Saint Lucia                      | 1990-1994   | 4     | 70.6                             | 1992              | Vital Registration                                                                                                                                | 100.0            | 29.4                      |                                             |
| Saint Lucia                      | 1995-1999   | 4     | 72.5                             | 1997              | Vital Registration                                                                                                                                | 100.0            | 27.5                      |                                             |
| Saint Lucia                      | 2000-2004   | 4     | 79.2                             | 2004              | Vital Registration                                                                                                                                | 100.0            | 20.8                      |                                             |
| Saint Lucia                      | 2005-2009   | 4     | 78.4                             | 2009              | Vital Registration                                                                                                                                | 91.4             | 16.0                      |                                             |
| Saint Lucia                      | 2010-2016   | 5     | 85.2                             | 2014              | Vital Registration                                                                                                                                | 100.0            | 14.8                      |                                             |
| Saint Vincent and the Grenadines | 1980-1984   | 4     | 71.6                             | 1983              | Vital Registration                                                                                                                                | 100.0            | 28.4                      |                                             |
| Saint Vincent and the Grenadines | 1985-1989   | 3     | 61.1                             | 1986              | Vital Registration                                                                                                                                | 89.6             | 31.8                      |                                             |
| Saint Vincent and the Grenadines | 1990-1994   | 3     | 58.6                             | 1990              | Vital Registration                                                                                                                                | 92.7             | 36.8                      |                                             |
| Saint Vincent and the Grenadines | 1995-1999   | 4     | 79.0                             | 1998              | Vital Registration                                                                                                                                | 100.0            | 21.0                      |                                             |
| Saint Vincent and the Grenadines | 2000-2004   | 4     | 81.0                             | 2004              | Vital Registration                                                                                                                                | 95.6             | 15.3                      |                                             |
| Saint Vincent and the Grenadines | 2005-2009   | 4     | 83.0                             | 2005              | Vital Registration                                                                                                                                | 99.7             | 16.7                      |                                             |
| Saint Vincent and the Grenadines | 2010-2016   | 5     | 87.5                             | 2014              | Vital Registration                                                                                                                                | 100.0            | 12.5                      |                                             |
| Samoa                            | 1980-1984   | 0     |                                  |                   |                                                                                                                                                   |                  |                           |                                             |
| Samoa                            | 1985-1989   | 0     |                                  |                   |                                                                                                                                                   |                  |                           |                                             |
| Samoa                            | 1990-1994   | 0     |                                  |                   |                                                                                                                                                   |                  |                           |                                             |
| Samoa                            | 1995-1999   | 0     |                                  |                   |                                                                                                                                                   |                  |                           |                                             |
| Samoa                            | 2000-2004   | 0     |                                  |                   |                                                                                                                                                   |                  |                           |                                             |
| Samoa                            | 2005-2009   | 0     |                                  |                   |                                                                                                                                                   |                  |                           |                                             |
| Samoa                            | 2010-2016   | 0     |                                  |                   |                                                                                                                                                   |                  |                           |                                             |
| Sao Tome and Principe            | 1980-1984   | 0     |                                  |                   |                                                                                                                                                   |                  |                           |                                             |
| Sao Tome and Principe            | 1985-1989   | 4     | 69.0                             | 1985              | Vital Registration                                                                                                                                | 100.0            | 31.0                      |                                             |
| Sao Tome and Principe            | 1990-1994   | 0     |                                  |                   |                                                                                                                                                   |                  |                           |                                             |
| Sao Tome and Principe            | 1995-1999   | 0     |                                  |                   |                                                                                                                                                   |                  |                           |                                             |
| Sao Tome and Principe            | 2000-2004   | 0     |                                  |                   |                                                                                                                                                   |                  |                           |                                             |
| Sao Tome and Principe            | 2005-2009   | 0     |                                  |                   |                                                                                                                                                   |                  |                           |                                             |
| Sao Tome and Principe            | 2010-2016   | 0     |                                  |                   |                                                                                                                                                   |                  |                           |                                             |
| Saudi Arabia                     | 1980-1984   | 0     |                                  |                   |                                                                                                                                                   |                  |                           |                                             |
| Saudi Arabia                     | 1985-1989   | 0     |                                  |                   |                                                                                                                                                   |                  |                           |                                             |
| Saudi Arabia                     | 1990-1994   | 0     |                                  |                   |                                                                                                                                                   |                  |                           |                                             |
| Saudi Arabia                     | 1995-1999   | 2     | 26.3                             | 1999              | Vital Registration                                                                                                                                | 47.7             | 44.9                      |                                             |
| Saudi Arabia                     | 2000-2004   | 2     | 31.7                             | 2004              | Vital Registration                                                                                                                                | 62.9             | 49.6                      |                                             |
| Saudi Arabia                     | 2005-2009   | 2     | 34.6                             | 2008              | Vital Registration                                                                                                                                | 73.7             | 53.1                      |                                             |
| Saudi Arabia                     | 2010-2016   | 2     | 34.5                             | 2010              | Vital Registration                                                                                                                                | 75.5             | 54.3                      |                                             |
| Senegal                          | 1980-1984   | 1     | 2.0                              | 1984              | Senegal - Risk of Death Associated with Different Nutritional States in Children of Preschool age: Study Conducted in Niakhar (Senegal) 1983-1986 |                  | 28.7                      | 2.7                                         |
| Senegal                          | 1985-1989   | 1     | 2.4                              | 1986              | International differences in clinical patterns of diarrhoeal deaths: a comparison of children from Brazil, Senegal, Bangladesh, and India         |                  | 30.0                      | 3.5                                         |
| Senegal                          | 1990-1994   | 1     | 2.6                              | 1993              | Childhood mortality and probable causes of death using verbal autopsy in Niakhar, Senegal, 1989-2000                                              |                  | 26.2                      | 3.5                                         |
| Senegal                          | 1995-1999   | 1     | 2.5                              | 1996              | Childhood mortality and probable causes of death using verbal autopsy in Niakhar, Senegal, 1989-2000                                              |                  | 25.1                      | 3.3                                         |
| Senegal                          | 2000-2004   | 0     |                                  |                   |                                                                                                                                                   |                  |                           |                                             |
| Senegal                          | 2005-2009   | 1     | 0.0                              | 2008              | Africa, Asia, Oceania - INDEPTH Network Cause-Specific Mortality - Release 2014                                                                   |                  | 99.6                      | 6.4                                         |
| Senegal                          | 2010-2016   | 0     | 0.0                              | 2010              | Africa, Asia, Oceania - INDEPTH Network Cause-Specific Mortality - Release 2014                                                                   |                  | 100.0                     | 6.4                                         |
| Serbia                           | 1980-1984   | 0     |                                  |                   |                                                                                                                                                   |                  |                           |                                             |
| Serbia                           | 1985-1989   | 0     |                                  |                   |                                                                                                                                                   |                  |                           |                                             |
| Serbia                           | 1990-1994   | 0     |                                  |                   |                                                                                                                                                   |                  |                           |                                             |
| Serbia                           | 1995-1999   | 4     | 71.1                             | 1998              | Vital Registration                                                                                                                                | 92.4             | 20.9                      |                                             |
| Serbia                           | 2000-2004   | 4     | 75.1                             | 2003              | Vital Registration                                                                                                                                | 94.2             | 20.4                      |                                             |
| Serbia                           | 2005-2009   | 4     | 79.7                             | 2005              | Vital Registration                                                                                                                                | 96.5             | 17.4                      |                                             |
| Serbia                           | 2010-2016   | 4     | 77.9                             | 2010              | Vital Registration                                                                                                                                | 93.5             | 16.7                      |                                             |
| Seychelles                       | 1980-1984   | 4     | 69.9                             | 1982              | Vital Registration                                                                                                                                | 98.8             | 29.3                      |                                             |
| Seychelles                       | 1985-1989   | 3     | 63.6                             | 1987              | Vital Registration                                                                                                                                | 91.0             | 30.1                      |                                             |
| Seychelles                       | 1990-1994   | 0     |                                  |                   |                                                                                                                                                   |                  |                           |                                             |
| Seychelles                       | 1995-1999   | 0     |                                  |                   |                                                                                                                                                   |                  |                           |                                             |
| Seychelles                       | 2000-2004   | 4     | 75.9                             | 2002              | Vital Registration                                                                                                                                | 99.9             | 24.0                      |                                             |
| Seychelles                       | 2005-2009   | 4     | 77.0                             | 2008              | Vital Registration                                                                                                                                | 100.0            | 23.0                      |                                             |
| Seychelles                       | 2010-2016   | 4     | 78.1                             | 2011              | Vital Registration                                                                                                                                | 100.0            | 21.9                      |                                             |
| Sierra Leone                     | 1980-1984   | 0     |                                  |                   |                                                                                                                                                   |                  |                           |                                             |
| Sierra Leone                     | 1985-1989   | 0     |                                  |                   |                                                                                                                                                   |                  |                           |                                             |
| Sierra Leone                     | 1990-1994   | 1     | 3.8                              | 1990              | Malaria in a rural area of Sierra Leone. I. Initial results                                                                                       |                  | 10.8                      | 4.2                                         |
| Sierra Leone                     | 1995-1999   | 0     |                                  |                   |                                                                                                                                                   |                  |                           |                                             |
| Sierra Leone                     | 2000-2004   | 0     |                                  |                   |                                                                                                                                                   |                  |                           |                                             |
| Sierra Leone                     | 2005-2009   | 0     |                                  |                   |                                                                                                                                                   |                  |                           |                                             |
| Sierra Leone                     | 2010-2016   | 0     |                                  |                   |                                                                                                                                                   |                  |                           |                                             |
| Singapore                        | 1980-1984   | 5     | 89.1                             | 1983              | Vital Registration                                                                                                                                | 100.0            | 10.9                      |                                             |
| Singapore                        | 1985-1989   | 5     | 89.6                             | 1985              | Vital Registration                                                                                                                                | 100.0            | 10.4                      |                                             |
| Singapore                        | 1990-1994   | 5     | 95.0                             | 1994              | Vital Registration                                                                                                                                | 100.0            | 5.0                       |                                             |
| Singapore                        | 1995-1999   | 5     | 95.3                             | 1999              | Vital Registration                                                                                                                                | 100.0            | 4.7                       |                                             |
| Singapore                        | 2000-2004   | 5     | 95.1                             | 2003              | Vital Registration                                                                                                                                | 100.0            | 4.9                       |                                             |
| Singapore                        | 2005-2009   | 5     | 92.5                             | 2008              | Vital Registration                                                                                                                                | 100.0            | 7.5                       |                                             |
| Singapore                        | 2010-2016   | 5     | 97.8                             | 2014              | Vital Registration                                                                                                                                | 99.9             | 2.2                       |                                             |
| Slovakia                         | 1980-1984   | 0     |                                  |                   |                                                                                                                                                   |                  |                           |                                             |
| Slovakia                         | 1985-1989   | 0     |                                  |                   |                                                                                                                                                   |                  |                           |                                             |
| Slovakia                         | 1990-1994   | 4     | 82.4                             | 1994              | Vital Registration                                                                                                                                | 99.3             | 17.1                      |                                             |
| Slovakia                         | 1995-1999   | 4     | 82.7                             | 1999              | Vital Registration                                                                                                                                | 100.0            | 17.3                      |                                             |
| Slovakia                         | 2000-2004   | 5     | 85.2                             | 2003              | Vital Registration                                                                                                                                | 100.0            | 14.8                      |                                             |
| Slovakia                         | 2005-2009   | 5     | 90.3                             | 2008              | Vital Registration                                                                                                                                | 99.9             | 9.6                       |                                             |
| Slovakia                         | 2010-2016   | 5     | 92.9                             | 2012              | Vital Registration                                                                                                                                | 100.0            | 7.1                       |                                             |
| Slovenia                         | 1980-1984   | 0     |                                  |                   |                                                                                                                                                   |                  |                           |                                             |
| Slovenia                         | 1985-1989   | 5     | 89.4                             | 1985              | Vital Registration                                                                                                                                | 97.7             | 8.5                       |                                             |
| Slovenia                         | 1990-1994   | 5     | 91.1                             | 1992              | Vital Registration                                                                                                                                | 98.6             | 7.6                       |                                             |
| Slovenia                         | 1995-1999   | 5     | 88.8                             | 1997              | Vital Registration                                                                                                                                | 96.7             | 8.3                       |                                             |
| Slovenia                         | 2000-2004   | 5     | 88.3                             | 2002              | Vital Registration                                                                                                                                | 100.0            | 11.7                      |                                             |
| Slovenia                         | 2005-2009   | 5     | 87.4                             | 2009              | Vital Registration                                                                                                                                | 99.0             | 11.8                      |                                             |
| Slovenia                         | 2010-2016   | 5     | 87.3                             | 2012              | Vital Registration                                                                                                                                | 99.3             | 12.1                      |                                             |
| Solomon Islands                  | 1980-1984   | 0     |                                  |                   |                                                                                                                                                   |                  |                           |                                             |
| Solomon Islands                  | 1985-1989   | 0     |                                  |                   |                                                                                                                                                   |                  |                           |                                             |
| Solomon Islands                  | 1990-1994   | 0     |                                  |                   |                                                                                                                                                   |                  |                           |                                             |
| Solomon Islands                  | 1995-1999   | 0     |                                  |                   |                                                                                                                                                   |                  |                           |                                             |
| Solomon Islands                  | 2000-2004   | 0     |                                  |                   |                                                                                                                                                   |                  |                           |                                             |
| Solomon Islands                  | 2005-2009   | 0     |                                  |                   |                                                                                                                                                   |                  |                           |                                             |
| Solomon Islands                  | 2010-2016   | 0     |                                  |                   |                                                                                                                                                   |                  |                           |                                             |
| Somalia                          | 1980-1984   | 0     |                                  |                   |                                                                                                                                                   |                  |                           |                                             |
| Somalia                          | 1985-1989   | 0     |                                  |                   |                                                                                                                                                   |                  |                           |                                             |
| Somalia                          | 1990-1994   | 0     |                                  |                   |                                                                                                                                                   |                  |                           |                                             |
| Somalia                          | 1995-1999   | 0     |                                  |                   |                                                                                                                                                   |                  |                           |                                             |
| Somalia                          | 2000-2004   | 0     |                                  |                   |                                                                                                                                                   |                  |                           |                                             |
| Somalia                          | 2005-2009   | 0     |                                  |                   |                                                                                                                                                   |                  |                           |                                             |
| Somalia                          | 2010-2016   | 0     |                                  |                   |                                                                                                                                                   |                  |                           |                                             |
| South Africa                     | 1980-1984   | 0     |                                  |                   |                                                                                                                                                   |                  |                           |                                             |
| South Africa                     | 1985-1989   | 0     |                                  |                   |                                                                                                                                                   |                  |                           |                                             |
| South Africa                     | 1990-1994   | 1     | 0.8                              | 1994              | Africa, Asia, Oceania - INDEPTH Network Cause-Specific Mortality - Release 2014                                                                   |                  | 86.9                      | 6.4                                         |
| South Africa                     | 1995-1999   | 3     | 45.2                             | 1999              | Vital Registration                                                                                                                                | 69.4             | 34.9                      |                                             |
| South Africa                     | 2000-2004   | 3     | 51.9                             | 2004              | Vital Registration                                                                                                                                | 76.3             | 32.0                      |                                             |
| South Africa                     | 2005-2009   | 3     | 52.6                             | 2008              | Vital Registration                                                                                                                                | 78.2             | 32.7                      |                                             |
| South Africa                     | 2010-2016   | 3     | 57.0                             | 2014              | Vital Registration                                                                                                                                | 83.5             | 31.8                      |                                             |
| South Korea                      | 1980-1984   | 0     |                                  |                   |                                                                                                                                                   |                  |                           |                                             |
| South Korea                      | 1985-1989   | 3     | 57.8                             | 1989              | Vital Registration                                                                                                                                | 81.0             | 28.7                      |                                             |
| South Korea                      | 1990-1994   | 4     | 74.6                             | 1994              | Vital Registration                                                                                                                                | 96.8             | 22.9                      |                                             |
| South Korea                      | 1995-1999   | 4     | 75.3                             | 1995              | Vital Registration                                                                                                                                | 99.7             | 24.5                      |                                             |
| South Korea                      | 2000-2004   | 4     | 84.6                             | 2002              | Vital Registration                                                                                                                                | 100.0            | 15.4                      |                                             |
| South Korea                      | 2005-2009   | 4     | 81.5                             | 2007              | Vital Registration                                                                                                                                | 99.2             | 17.9                      |                                             |
| South Korea                      | 2010-2016   | 4     | 80.9                             | 2012              | Vital Registration                                                                                                                                | 99.1             | 18.3                      |                                             |

Appendix Table 17. Underlying indicators for percent well-certified for data source with maximum percent well certified in each 5-year time interval for 195 countries, 1980-2016.

| Location                   | Time Window | Stars | Percent Well-Certified (PWC) (%) | Max PWC Data Year | Max PWC Data Source                                                                                                                                                                                                          | Completeness (%) | Percent Major Garbage (%) | Verbal Autopsy Adjustment (None for VR) (%) |
|----------------------------|-------------|-------|----------------------------------|-------------------|------------------------------------------------------------------------------------------------------------------------------------------------------------------------------------------------------------------------------|------------------|---------------------------|---------------------------------------------|
| South Sudan                | 1980-1984   | 0     |                                  |                   |                                                                                                                                                                                                                              |                  |                           |                                             |
| South Sudan                | 1985-1989   | 0     |                                  |                   |                                                                                                                                                                                                                              |                  |                           |                                             |
| South Sudan                | 1990-1994   | 0     |                                  |                   |                                                                                                                                                                                                                              |                  |                           |                                             |
| South Sudan                | 1995-1999   | 0     |                                  |                   |                                                                                                                                                                                                                              |                  |                           |                                             |
| South Sudan                | 2000-2004   | 0     |                                  |                   |                                                                                                                                                                                                                              |                  |                           |                                             |
| South Sudan                | 2005-2009   | 0     |                                  |                   |                                                                                                                                                                                                                              |                  |                           |                                             |
| South Sudan                | 2010-2016   | 0     |                                  |                   |                                                                                                                                                                                                                              |                  |                           |                                             |
| Spain                      | 1980-1984   | 4     | 76.7                             | 1984              | Vital Registration                                                                                                                                                                                                           | 98.8             | 22.4                      |                                             |
| Spain                      | 1985-1989   | 4     | 78.9                             | 1989              | Vital Registration                                                                                                                                                                                                           | 100.0            | 21.1                      |                                             |
| Spain                      | 1990-1994   | 4     | 80.1                             | 1993              | Vital Registration                                                                                                                                                                                                           | 99.9             | 19.8                      |                                             |
| Spain                      | 1995-1999   | 4     | 83.3                             | 1998              | Vital Registration                                                                                                                                                                                                           | 100.0            | 16.7                      |                                             |
| Spain                      | 2000-2004   | 4     | 83.2                             | 2002              | Vital Registration                                                                                                                                                                                                           | 100.0            | 16.8                      |                                             |
| Spain                      | 2005-2009   | 4     | 84.0                             | 2009              | Vital Registration                                                                                                                                                                                                           | 100.0            | 16.0                      |                                             |
| Spain                      | 2010-2016   | 5     | 85.4                             | 2014              | Vital Registration                                                                                                                                                                                                           | 99.9             | 14.5                      |                                             |
| Sri Lanka                  | 1980-1984   | 3     | 51.8                             | 1983              | Vital Registration                                                                                                                                                                                                           | 100.0            | 48.2                      |                                             |
| Sri Lanka                  | 1985-1989   | 3     | 50.9                             | 1986              | Vital Registration                                                                                                                                                                                                           | 100.0            | 49.1                      |                                             |
| Sri Lanka                  | 1990-1994   | 3     | 46.5                             | 1994              | Vital Registration                                                                                                                                                                                                           | 100.0            | 55.5                      |                                             |
| Sri Lanka                  | 1995-1999   | 3     | 55.5                             | 1999              | Vital Registration                                                                                                                                                                                                           | 100.0            | 44.5                      |                                             |
| Sri Lanka                  | 2000-2004   | 3     | 63.6                             | 2004              | Vital Registration                                                                                                                                                                                                           | 99.9             | 36.3                      |                                             |
| Sri Lanka                  | 2005-2009   | 4     | 67.4                             | 2007              | Vital Registration                                                                                                                                                                                                           | 100.0            | 32.6                      |                                             |
| Sri Lanka                  | 2010-2016   | 4     | 65.5                             | 2010              | Vital Registration                                                                                                                                                                                                           | 100.0            | 34.5                      |                                             |
| Sudan                      | 1980-1984   | 0     |                                  |                   |                                                                                                                                                                                                                              |                  |                           |                                             |
| Sudan                      | 1985-1989   | 0     |                                  |                   |                                                                                                                                                                                                                              |                  |                           |                                             |
| Sudan                      | 1990-1994   | 0     |                                  |                   |                                                                                                                                                                                                                              |                  |                           |                                             |
| Sudan                      | 1995-1999   | 0     |                                  |                   |                                                                                                                                                                                                                              |                  |                           |                                             |
| Sudan                      | 2000-2004   | 0     |                                  |                   |                                                                                                                                                                                                                              |                  |                           |                                             |
| Sudan                      | 2005-2009   | 0     |                                  |                   |                                                                                                                                                                                                                              |                  |                           |                                             |
| Sudan                      | 2010-2016   | 0     |                                  |                   |                                                                                                                                                                                                                              |                  |                           |                                             |
| Suriname                   | 1980-1984   | 3     | 59.7                             | 1984              | Vital Registration                                                                                                                                                                                                           | 89.1             | 33.0                      |                                             |
| Suriname                   | 1985-1989   | 3     | 62.1                             | 1989              | Vital Registration                                                                                                                                                                                                           | 91.6             | 32.2                      |                                             |
| Suriname                   | 1990-1994   | 3     | 58.6                             | 1991              | Vital Registration                                                                                                                                                                                                           | 84.8             | 31.0                      |                                             |
| Suriname                   | 1995-1999   | 3     | 58.5                             | 1999              | Vital Registration                                                                                                                                                                                                           | 81.4             | 28.1                      |                                             |
| Suriname                   | 2000-2004   | 4     | 66.0                             | 2002              | Vital Registration                                                                                                                                                                                                           | 82.9             | 20.4                      |                                             |
| Suriname                   | 2005-2009   | 3     | 64.9                             | 2008              | Vital Registration                                                                                                                                                                                                           | 80.6             | 19.4                      |                                             |
| Suriname                   | 2010-2016   | 4     | 65.1                             | 2010              | Vital Registration                                                                                                                                                                                                           | 79.4             | 18.1                      |                                             |
| Swaziland                  | 1980-1984   | 0     |                                  |                   |                                                                                                                                                                                                                              |                  |                           |                                             |
| Swaziland                  | 1985-1989   | 0     |                                  |                   |                                                                                                                                                                                                                              |                  |                           |                                             |
| Swaziland                  | 1990-1994   | 0     |                                  |                   |                                                                                                                                                                                                                              |                  |                           |                                             |
| Swaziland                  | 1995-1999   | 0     |                                  |                   |                                                                                                                                                                                                                              |                  |                           |                                             |
| Swaziland                  | 2000-2004   | 1     | 0.0                              | 2000              | Effect of HIV infection on pregnancy-related mortality in sub-Saharan Africa: secondary analyses of pooled community-based data from the network for Analyzing Longitudinal Population-based HIV/AIDS data on Africa (ALPHA) |                  | 94.9                      | 0.5                                         |
| Swaziland                  | 2005-2009   | 0     |                                  |                   |                                                                                                                                                                                                                              |                  |                           |                                             |
| Swaziland                  | 2010-2016   | 0     |                                  |                   |                                                                                                                                                                                                                              |                  |                           |                                             |
| Sweden                     | 1980-1984   | 5     | 87.6                             | 1980              | Vital Registration                                                                                                                                                                                                           | 99.3             | 11.8                      |                                             |
| Sweden                     | 1985-1989   | 5     | 88.4                             | 1988              | Vital Registration                                                                                                                                                                                                           | 100.0            | 11.6                      |                                             |
| Sweden                     | 1990-1994   | 5     | 88.0                             | 1990              | Vital Registration                                                                                                                                                                                                           | 100.0            | 12.0                      |                                             |
| Sweden                     | 1995-1999   | 5     | 87.0                             | 1997              | Vital Registration                                                                                                                                                                                                           | 100.0            | 13.0                      |                                             |
| Sweden                     | 2000-2004   | 5     | 85.9                             | 2001              | Vital Registration                                                                                                                                                                                                           | 99.8             | 13.9                      |                                             |
| Sweden                     | 2005-2009   | 5     | 85.4                             | 2006              | Vital Registration                                                                                                                                                                                                           | 99.2             | 14.0                      |                                             |
| Sweden                     | 2010-2016   | 4     | 84.8                             | 2014              | Vital Registration                                                                                                                                                                                                           | 99.8             | 15.1                      |                                             |
| Switzerland                | 1980-1984   | 4     | 69.3                             | 1981              | Vital Registration                                                                                                                                                                                                           | 100.0            | 30.7                      |                                             |
| Switzerland                | 1985-1989   | 4     | 69.2                             | 1986              | Vital Registration                                                                                                                                                                                                           | 100.0            | 30.8                      |                                             |
| Switzerland                | 1990-1994   | 4     | 68.3                             | 1990              | Vital Registration                                                                                                                                                                                                           | 100.0            | 31.7                      |                                             |
| Switzerland                | 1995-1999   | 4     | 84.6                             | 1998              | Vital Registration                                                                                                                                                                                                           | 100.0            | 15.4                      |                                             |
| Switzerland                | 2000-2004   | 4     | 84.4                             | 2003              | Vital Registration                                                                                                                                                                                                           | 100.0            | 15.6                      |                                             |
| Switzerland                | 2005-2009   | 5     | 86.6                             | 2008              | Vital Registration                                                                                                                                                                                                           | 99.8             | 13.3                      |                                             |
| Switzerland                | 2010-2016   | 5     | 86.1                             | 2010              | Vital Registration                                                                                                                                                                                                           | 100.0            | 13.9                      |                                             |
| Syria                      | 1980-1984   | 2     | 29.2                             | 1980              | Vital Registration                                                                                                                                                                                                           | 100.0            | 70.8                      |                                             |
| Syria                      | 1985-1989   | 2     | 15.8                             | 1985              | Vital Registration                                                                                                                                                                                                           | 79.2             | 80.0                      |                                             |
| Syria                      | 1990-1994   | 0     |                                  |                   |                                                                                                                                                                                                                              |                  |                           |                                             |
| Syria                      | 1995-1999   | 3     | 54.5                             | 1999              | Vital Registration                                                                                                                                                                                                           | 100.0            | 45.5                      |                                             |
| Syria                      | 2000-2004   | 3     | 59.2                             | 2004              | Vital Registration                                                                                                                                                                                                           | 86.9             | 31.9                      |                                             |
| Syria                      | 2005-2009   | 4     | 70.0                             | 2009              | Vital Registration                                                                                                                                                                                                           | 93.7             | 25.3                      |                                             |
| Syria                      | 2010-2016   | 3     | 59.6                             | 2010              | Vital Registration                                                                                                                                                                                                           | 99.8             | 40.2                      |                                             |
| Taiwan (province of China) | 1980-1984   | 0     |                                  |                   |                                                                                                                                                                                                                              |                  |                           |                                             |
| Taiwan (province of China) | 1985-1989   | 0     |                                  |                   |                                                                                                                                                                                                                              |                  |                           |                                             |
| Taiwan (province of China) | 1990-1994   | 3     | 37.2                             | 1994              | Vital Registration                                                                                                                                                                                                           | 95.6             | 61.0                      |                                             |
| Taiwan (province of China) | 1995-1999   | 3     | 37.3                             | 1995              | Vital Registration                                                                                                                                                                                                           | 96.8             | 61.5                      |                                             |
| Taiwan (province of China) | 2000-2004   | 3     | 39.4                             | 2004              | Vital Registration                                                                                                                                                                                                           | 98.6             | 60.1                      |                                             |
| Taiwan (province of China) | 2005-2009   | 4     | 83.9                             | 2007              | Vital Registration                                                                                                                                                                                                           | 99.1             | 15.3                      |                                             |
| Taiwan (province of China) | 2010-2016   | 4     | 84.5                             | 2014              | Vital Registration                                                                                                                                                                                                           | 99.6             | 15.1                      |                                             |
| Tajikistan                 | 1980-1984   | 4     | 67.1                             | 1981              | Vital Registration                                                                                                                                                                                                           | 80.5             | 16.7                      |                                             |
| Tajikistan                 | 1985-1989   | 3     | 61.0                             | 1988              | Vital Registration                                                                                                                                                                                                           | 80.2             | 23.9                      |                                             |
| Tajikistan                 | 1990-1994   | 4     | 68.8                             | 1993              | Vital Registration                                                                                                                                                                                                           | 100.0            | 31.2                      |                                             |
| Tajikistan                 | 1995-1999   | 3     | 53.7                             | 1995              | Vital Registration                                                                                                                                                                                                           | 76.6             | 29.9                      |                                             |
| Tajikistan                 | 2000-2004   | 3     | 46.4                             | 2002              | Vital Registration                                                                                                                                                                                                           | 67.8             | 31.4                      |                                             |
| Tajikistan                 | 2005-2009   | 3     | 47.7                             | 2005              | Vital Registration                                                                                                                                                                                                           | 72.1             | 33.9                      |                                             |
| Tajikistan                 | 2010-2016   | 0     |                                  |                   |                                                                                                                                                                                                                              |                  |                           |                                             |
| Tanzania                   | 1980-1984   | 0     |                                  |                   |                                                                                                                                                                                                                              |                  |                           |                                             |
| Tanzania                   | 1985-1989   | 1     | 3.1                              | 1986              | Risk factors for deaths in children under 5 years old in Bagamoyo district, Tanzania                                                                                                                                         |                  | 20.7                      | 3.9                                         |
| Tanzania                   | 1990-1994   | 1     | 1.9                              | 1993              | Community based studies on childhood mortality in a malaria holoendemic area on the Tanzanian coast                                                                                                                          |                  | 46.6                      | 3.5                                         |
| Tanzania                   | 1995-1999   | 1     | 1.8                              | 1995              | The Policy Implications of Tanzania's Mortality Burden                                                                                                                                                                       |                  | 71.1                      | 6.4                                         |
| Tanzania                   | 2000-2004   | 1     | 4.9                              | 2001              | Tanzania - Hakara Health and Demographic Surveillance System                                                                                                                                                                 |                  | 22.9                      | 6.4                                         |
| Tanzania                   | 2005-2009   | 1     | 2.6                              | 2005              | The contribution of reduction in malaria as a cause of rapid decline of under-five mortality: evidence from the Rufiji Health and Demographic Surveillance System (HDSS) in rural Tanzania                                   |                  | 6.7                       | 2.8                                         |
| Tanzania                   | 2010-2016   | 0     |                                  |                   |                                                                                                                                                                                                                              |                  |                           |                                             |
| Thailand                   | 1980-1984   | 2     | 28.4                             | 1980              | Vital Registration                                                                                                                                                                                                           | 75.5             | 62.4                      |                                             |
| Thailand                   | 1985-1989   | 2     | 27.1                             | 1987              | Vital Registration                                                                                                                                                                                                           | 76.0             | 64.4                      |                                             |
| Thailand                   | 1990-1994   | 2     | 33.9                             | 1994              | Vital Registration                                                                                                                                                                                                           | 83.5             | 59.3                      |                                             |
| Thailand                   | 1995-1999   | 3     | 47.7                             | 1997              | Thailand Burden of Disease and Injuries 1998-1999                                                                                                                                                                            |                  | 25.4                      | 64.0                                        |
| Thailand                   | 2000-2004   | 3     | 47.7                             | 2003              | Vital Registration                                                                                                                                                                                                           | 92.3             | 48.3                      |                                             |
| Thailand                   | 2005-2009   | 3     | 52.0                             | 2005              | Thailand Verbal Autopsy Study 2005                                                                                                                                                                                           |                  | 18.7                      | 64.0                                        |
| Thailand                   | 2010-2016   | 3     | 57.5                             | 2014              | Vital Registration                                                                                                                                                                                                           | 97.2             | 40.8                      |                                             |
| The Bahamas                | 1980-1984   | 4     | 74.6                             | 1980              | Vital Registration                                                                                                                                                                                                           | 100.0            | 25.4                      |                                             |
| The Bahamas                | 1985-1989   | 4     | 79.7                             | 1987              | Vital Registration                                                                                                                                                                                                           | 99.7             | 20.1                      |                                             |
| The Bahamas                | 1990-1994   | 3     | 63.8                             | 1994              | Vital Registration                                                                                                                                                                                                           | 96.0             | 33.5                      |                                             |
| The Bahamas                | 1995-1999   | 4     | 78.0                             | 1999              | Vital Registration                                                                                                                                                                                                           | 87.0             | 10.3                      |                                             |
| The Bahamas                | 2000-2004   | 4     | 80.2                             | 2001              | Vital Registration                                                                                                                                                                                                           | 91.8             | 12.6                      |                                             |
| The Bahamas                | 2005-2009   | 4     | 79.8                             | 2009              | Vital Registration                                                                                                                                                                                                           | 91.9             | 13.2                      |                                             |
| The Bahamas                | 2010-2016   | 4     | 77.6                             | 2011              | Vital Registration                                                                                                                                                                                                           | 89.7             | 13.4                      |                                             |
| The Gambia                 | 1980-1984   | 1     | 3.2                              | 1982              | Deaths in infancy and early childhood in a well-vaccinated, rural, West African population                                                                                                                                   |                  | 20.7                      | 4.1                                         |
| The Gambia                 | 1985-1989   | 1     | 2.6                              | 1989              | Changes in the pattern of infant and childhood mortality in upper river division, The Gambia, from 1989 to 1993                                                                                                              |                  | 29.4                      | 3.6                                         |
| The Gambia                 | 1990-1994   | 1     | 2.5                              | 1991              | Changes in the pattern of infant and childhood mortality in upper river division, The Gambia, from 1989 to 1993                                                                                                              |                  | 30.2                      | 3.6                                         |
| The Gambia                 | 1995-1999   | 1     | 1.1                              | 1999              | Reaching millennium development goal 4 - the Gambia                                                                                                                                                                          |                  | 65.1                      | 3.3                                         |
| The Gambia                 | 2000-2004   | 1     | 0.9                              | 2002              | Reaching millennium development goal 4 - the Gambia                                                                                                                                                                          |                  | 70.4                      | 3.1                                         |

Appendix Table 17. Underlying indicators for percent well-certified for data source with maximum percent well certified in each 5-year time interval for 195 countries, 1980-2016.

| Location             | Time Window | Stars | Percent Well-Certified (PWC) (%) | Max PWC Data Year | Max PWC Data Source                                                                                                                                                                                                          | Completeness (%) | Percent Major Garbage (%) | Verbal Autopsy Adjustment (None for VR) (%) |
|----------------------|-------------|-------|----------------------------------|-------------------|------------------------------------------------------------------------------------------------------------------------------------------------------------------------------------------------------------------------------|------------------|---------------------------|---------------------------------------------|
| The Gambia           | 2005-2009   | 1     | 1.3                              | 2006              | Preventive measures in infancy to reduce under-five mortality: a case-control study in The Gambia                                                                                                                            |                  | 56.0                      | 2.9                                         |
| The Gambia           | 2010-2016   | 0     |                                  |                   |                                                                                                                                                                                                                              |                  |                           |                                             |
| Timor-Leste          | 1980-1984   | 0     |                                  |                   |                                                                                                                                                                                                                              |                  |                           |                                             |
| Timor-Leste          | 1985-1989   | 0     |                                  |                   |                                                                                                                                                                                                                              |                  |                           |                                             |
| Timor-Leste          | 1990-1994   | 0     |                                  |                   |                                                                                                                                                                                                                              |                  |                           |                                             |
| Timor-Leste          | 1995-1999   | 0     |                                  |                   |                                                                                                                                                                                                                              |                  |                           |                                             |
| Timor-Leste          | 2000-2004   | 0     |                                  |                   |                                                                                                                                                                                                                              |                  |                           |                                             |
| Timor-Leste          | 2005-2009   | 0     |                                  |                   |                                                                                                                                                                                                                              |                  |                           |                                             |
| Timor-Leste          | 2010-2016   | 0     |                                  |                   |                                                                                                                                                                                                                              |                  |                           |                                             |
| Togo                 | 1980-1984   | 0     |                                  |                   |                                                                                                                                                                                                                              |                  |                           |                                             |
| Togo                 | 1985-1989   | 0     |                                  |                   |                                                                                                                                                                                                                              |                  |                           |                                             |
| Togo                 | 1990-1994   | 0     |                                  |                   |                                                                                                                                                                                                                              |                  |                           |                                             |
| Togo                 | 1995-1999   | 0     |                                  |                   |                                                                                                                                                                                                                              |                  |                           |                                             |
| Togo                 | 2000-2004   | 0     |                                  |                   |                                                                                                                                                                                                                              |                  |                           |                                             |
| Togo                 | 2005-2009   | 0     |                                  |                   |                                                                                                                                                                                                                              |                  |                           |                                             |
| Togo                 | 2010-2016   | 0     |                                  |                   |                                                                                                                                                                                                                              |                  |                           |                                             |
| Tonga                | 1980-1984   | 0     |                                  |                   |                                                                                                                                                                                                                              |                  |                           |                                             |
| Tonga                | 1985-1989   | 0     |                                  |                   |                                                                                                                                                                                                                              |                  |                           |                                             |
| Tonga                | 1990-1994   | 0     |                                  |                   |                                                                                                                                                                                                                              |                  |                           |                                             |
| Tonga                | 1995-1999   | 0     |                                  |                   |                                                                                                                                                                                                                              |                  |                           |                                             |
| Tonga                | 2000-2004   | 3     | 53.6                             | 2003              | Vital Registration                                                                                                                                                                                                           | 100.0            | 46.4                      |                                             |
| Tonga                | 2005-2009   | 0     |                                  |                   |                                                                                                                                                                                                                              |                  |                           |                                             |
| Tonga                | 2010-2016   | 0     |                                  |                   |                                                                                                                                                                                                                              |                  |                           |                                             |
| Trinidad and Tobago  | 1980-1984   | 4     | 79.2                             | 1982              | Vital Registration                                                                                                                                                                                                           | 96.9             | 18.3                      |                                             |
| Trinidad and Tobago  | 1985-1989   | 4     | 80.3                             | 1987              | Vital Registration                                                                                                                                                                                                           | 96.9             | 17.2                      |                                             |
| Trinidad and Tobago  | 1990-1994   | 4     | 81.4                             | 1994              | Vital Registration                                                                                                                                                                                                           | 100.0            | 18.6                      |                                             |
| Trinidad and Tobago  | 1995-1999   | 5     | 89.6                             | 1999              | Vital Registration                                                                                                                                                                                                           | 100.0            | 10.4                      |                                             |
| Trinidad and Tobago  | 2000-2004   | 5     | 90.5                             | 2003              | Vital Registration                                                                                                                                                                                                           | 100.0            | 9.5                       |                                             |
| Trinidad and Tobago  | 2005-2009   | 5     | 89.6                             | 2005              | Vital Registration                                                                                                                                                                                                           | 100.0            | 10.4                      |                                             |
| Trinidad and Tobago  | 2010-2016   | 5     | 89.0                             | 2010              | Vital Registration                                                                                                                                                                                                           | 100.0            | 11.0                      |                                             |
| Tunisia              | 1980-1984   | 0     |                                  |                   |                                                                                                                                                                                                                              |                  |                           |                                             |
| Tunisia              | 1985-1989   | 0     |                                  |                   |                                                                                                                                                                                                                              |                  |                           |                                             |
| Tunisia              | 1990-1994   | 0     |                                  |                   |                                                                                                                                                                                                                              |                  |                           |                                             |
| Tunisia              | 1995-1999   | 0     |                                  |                   |                                                                                                                                                                                                                              |                  |                           |                                             |
| Tunisia              | 2000-2004   | 0     |                                  |                   |                                                                                                                                                                                                                              |                  |                           |                                             |
| Tunisia              | 2005-2009   | 2     | 28.8                             | 2009              | Vital Registration                                                                                                                                                                                                           | 38.7             | 25.7                      |                                             |
| Tunisia              | 2010-2016   | 2     | 24.7                             | 2013              | Vital Registration                                                                                                                                                                                                           | 38.0             | 35.0                      |                                             |
| Turkey               | 1980-1984   | 2     | 16.9                             | 1984              | Vital Registration                                                                                                                                                                                                           | 38.0             | 55.6                      |                                             |
| Turkey               | 1985-1989   | 2     | 20.7                             | 1989              | Vital Registration                                                                                                                                                                                                           | 45.2             | 54.2                      |                                             |
| Turkey               | 1990-1994   | 2     | 22.1                             | 1993              | Vital Registration                                                                                                                                                                                                           | 48.1             | 54.1                      |                                             |
| Turkey               | 1995-1999   | 2     | 24.9                             | 1998              | Vital Registration                                                                                                                                                                                                           | 55.1             | 54.9                      |                                             |
| Turkey               | 2000-2004   | 3     | 37.4                             | 2002              | Turkey Verbal Autopsy Survey 2003                                                                                                                                                                                            |                  | 41.5                      | 64.0                                        |
| Turkey               | 2005-2009   | 4     | 72.8                             | 2009              | Vital Registration                                                                                                                                                                                                           | 90.9             | 19.9                      |                                             |
| Turkey               | 2010-2016   | 4     | 84.4                             | 2013              | Vital Registration                                                                                                                                                                                                           | 99.7             | 15.4                      |                                             |
| Turkmenistan         | 1980-1984   | 4     | 83.9                             | 1981              | Vital Registration                                                                                                                                                                                                           | 95.6             | 12.2                      |                                             |
| Turkmenistan         | 1985-1989   | 5     | 86.0                             | 1986              | Vital Registration                                                                                                                                                                                                           | 98.5             | 12.6                      |                                             |
| Turkmenistan         | 1990-1994   | 4     | 79.7                             | 1993              | Vital Registration                                                                                                                                                                                                           | 95.4             | 16.5                      |                                             |
| Turkmenistan         | 1995-1999   | 4     | 74.1                             | 1995              | Vital Registration                                                                                                                                                                                                           | 92.8             | 19.8                      |                                             |
| Turkmenistan         | 2000-2004   | 4     | 65.5                             | 2003              | Vital Registration                                                                                                                                                                                                           | 71.1             | 15.1                      |                                             |
| Turkmenistan         | 2005-2009   | 4     | 66.8                             | 2005              | Vital Registration                                                                                                                                                                                                           | 80.3             | 16.9                      |                                             |
| Turkmenistan         | 2010-2016   | 4     | 70.6                             | 2014              | Vital Registration                                                                                                                                                                                                           | 93.0             | 24.1                      |                                             |
| Uganda               | 1980-1984   | 0     |                                  |                   |                                                                                                                                                                                                                              |                  |                           |                                             |
| Uganda               | 1985-1989   | 0     |                                  |                   |                                                                                                                                                                                                                              |                  |                           |                                             |
| Uganda               | 1990-1994   | 0     |                                  |                   |                                                                                                                                                                                                                              |                  |                           |                                             |
| Uganda               | 1995-1999   | 0     |                                  |                   |                                                                                                                                                                                                                              |                  |                           |                                             |
| Uganda               | 2000-2004   | 1     | 0.0                              | 2000              | Effect of HIV infection on pregnancy-related mortality in sub-Saharan Africa: secondary analyses of pooled community-based data from the network for Analysing Longitudinal Population-based HIV/AIDS data on Africa (ALPHA) |                  | 95.7                      | 0.4                                         |
| Uganda               | 2005-2009   | 1     | 2.7                              | 2006              | Uganda Child Verbal Autopsy Study 2007                                                                                                                                                                                       |                  | 12.5                      | 3.1                                         |
| Uganda               | 2010-2016   | 0     |                                  |                   |                                                                                                                                                                                                                              |                  |                           |                                             |
| Ukraine              | 1980-1984   | 4     | 84.7                             | 1981              | Vital Registration                                                                                                                                                                                                           | 98.2             | 13.7                      |                                             |
| Ukraine              | 1985-1989   | 5     | 87.8                             | 1985              | Vital Registration                                                                                                                                                                                                           | 100.0            | 12.5                      |                                             |
| Ukraine              | 1990-1994   | 4     | 81.0                             | 1994              | Vital Registration                                                                                                                                                                                                           | 100.0            | 19.0                      |                                             |
| Ukraine              | 1995-1999   | 4     | 83.5                             | 1999              | Vital Registration                                                                                                                                                                                                           | 100.0            | 16.5                      |                                             |
| Ukraine              | 2000-2004   | 4     | 83.8                             | 2000              | Vital Registration                                                                                                                                                                                                           | 100.0            | 16.2                      |                                             |
| Ukraine              | 2005-2009   | 5     | 89.0                             | 2009              | Vital Registration                                                                                                                                                                                                           | 100.0            | 11.0                      |                                             |
| Ukraine              | 2010-2016   | 5     | 90.4                             | 2012              | Vital Registration                                                                                                                                                                                                           | 100.0            | 9.6                       |                                             |
| United Arab Emirates | 1980-1984   | 0     |                                  |                   |                                                                                                                                                                                                                              |                  |                           |                                             |
| United Arab Emirates | 1985-1989   | 0     |                                  |                   |                                                                                                                                                                                                                              |                  |                           |                                             |
| United Arab Emirates | 1990-1994   | 0     |                                  |                   |                                                                                                                                                                                                                              |                  |                           |                                             |
| United Arab Emirates | 1995-1999   | 0     |                                  |                   |                                                                                                                                                                                                                              |                  |                           |                                             |
| United Arab Emirates | 2000-2004   | 0     |                                  |                   |                                                                                                                                                                                                                              |                  |                           |                                             |
| United Arab Emirates | 2005-2009   | 3     | 36.5                             | 2007              | Vital Registration                                                                                                                                                                                                           | 71.9             | 49.3                      |                                             |
| United Arab Emirates | 2010-2016   | 0     |                                  |                   |                                                                                                                                                                                                                              |                  |                           |                                             |
| United Kingdom       | 1980-1984   | 5     | 93.1                             | 1983              | Vital Registration                                                                                                                                                                                                           | 99.5             | 6.4                       |                                             |
| United Kingdom       | 1985-1989   | 5     | 93.9                             | 1985              | Vital Registration                                                                                                                                                                                                           | 100.0            | 6.1                       |                                             |
| United Kingdom       | 1990-1994   | 5     | 93.9                             | 1991              | Vital Registration                                                                                                                                                                                                           | 99.9             | 6.1                       |                                             |
| United Kingdom       | 1995-1999   | 5     | 91.9                             | 1995              | Vital Registration                                                                                                                                                                                                           | 100.0            | 8.1                       |                                             |
| United Kingdom       | 2000-2004   | 5     | 91.4                             | 2002              | Vital Registration                                                                                                                                                                                                           | 100.0            | 8.6                       |                                             |
| United Kingdom       | 2005-2009   | 5     | 91.4                             | 2007              | Vital Registration                                                                                                                                                                                                           | 100.0            | 8.6                       |                                             |
| United Kingdom       | 2010-2016   | 5     | 91.3                             | 2010              | Vital Registration                                                                                                                                                                                                           | 99.9             | 8.6                       |                                             |
| United States        | 1980-1984   | 5     | 90.3                             | 1980              | Vital Registration                                                                                                                                                                                                           | 100.0            | 9.7                       |                                             |
| United States        | 1985-1989   | 5     | 89.0                             | 1989              | Vital Registration                                                                                                                                                                                                           | 100.0            | 11.0                      |                                             |
| United States        | 1990-1994   | 5     | 89.5                             | 1990              | Vital Registration                                                                                                                                                                                                           | 100.0            | 10.5                      |                                             |
| United States        | 1995-1999   | 5     | 88.8                             | 1995              | Vital Registration                                                                                                                                                                                                           | 100.0            | 11.2                      |                                             |
| United States        | 2000-2004   | 5     | 88.0                             | 2000              | Vital Registration                                                                                                                                                                                                           | 100.0            | 12.0                      |                                             |
| United States        | 2005-2009   | 5     | 87.3                             | 2005              | Vital Registration                                                                                                                                                                                                           | 100.0            | 12.7                      |                                             |
| United States        | 2010-2016   | 5     | 86.9                             | 2010              | Vital Registration                                                                                                                                                                                                           | 100.0            | 13.1                      |                                             |
| Uruguay              | 1980-1984   | 4     | 76.3                             | 1980              | Vital Registration                                                                                                                                                                                                           | 100.0            | 23.7                      |                                             |
| Uruguay              | 1985-1989   | 4     | 75.6                             | 1989              | Vital Registration                                                                                                                                                                                                           | 99.6             | 24.1                      |                                             |
| Uruguay              | 1990-1994   | 4     | 77.2                             | 1991              | Vital Registration                                                                                                                                                                                                           | 98.1             | 21.3                      |                                             |
| Uruguay              | 1995-1999   | 4     | 79.1                             | 1998              | Vital Registration                                                                                                                                                                                                           | 100.0            | 20.9                      |                                             |
| Uruguay              | 2000-2004   | 4     | 79.2                             | 2001              | Vital Registration                                                                                                                                                                                                           | 99.5             | 20.4                      |                                             |
| Uruguay              | 2005-2009   | 4     | 78.6                             | 2005              | Vital Registration                                                                                                                                                                                                           | 100.0            | 21.4                      |                                             |
| Uruguay              | 2010-2016   | 4     | 75.7                             | 2014              | Vital Registration                                                                                                                                                                                                           | 99.0             | 23.5                      |                                             |
| Uzbekistan           | 1980-1984   | 4     | 82.6                             | 1982              | Vital Registration                                                                                                                                                                                                           | 97.8             | 15.5                      |                                             |
| Uzbekistan           | 1985-1989   | 5     | 85.2                             | 1985              | Vital Registration                                                                                                                                                                                                           | 99.7             | 14.5                      |                                             |
| Uzbekistan           | 1990-1994   | 4     | 80.0                             | 1992              | Vital Registration                                                                                                                                                                                                           | 95.0             | 15.7                      |                                             |
| Uzbekistan           | 1995-1999   | 4     | 72.1                             | 1995              | Vital Registration                                                                                                                                                                                                           | 87.3             | 17.5                      |                                             |
| Uzbekistan           | 2000-2004   | 3     | 61.1                             | 2000              | Vital Registration                                                                                                                                                                                                           | 75.7             | 19.4                      |                                             |
| Uzbekistan           | 2005-2009   | 3     | 63.0                             | 2005              | Vital Registration                                                                                                                                                                                                           | 70.9             | 11.2                      |                                             |
| Uzbekistan           | 2010-2016   | 4     | 65.3                             | 2011              | Vital Registration                                                                                                                                                                                                           | 72.2             | 9.6                       |                                             |
| Vanuatu              | 1980-1984   | 0     |                                  |                   |                                                                                                                                                                                                                              |                  |                           |                                             |
| Vanuatu              | 1985-1989   | 0     |                                  |                   |                                                                                                                                                                                                                              |                  |                           |                                             |
| Vanuatu              | 1990-1994   | 0     |                                  |                   |                                                                                                                                                                                                                              |                  |                           |                                             |
| Vanuatu              | 1995-1999   | 0     |                                  |                   |                                                                                                                                                                                                                              |                  |                           |                                             |
| Vanuatu              | 2000-2004   | 0     |                                  |                   |                                                                                                                                                                                                                              |                  |                           |                                             |
| Vanuatu              | 2005-2009   | 0     |                                  |                   |                                                                                                                                                                                                                              |                  |                           |                                             |
| Vanuatu              | 2010-2016   | 0     |                                  |                   |                                                                                                                                                                                                                              |                  |                           |                                             |
| Venezuela            | 1980-1984   | 4     | 79.2                             | 1983              | Vital Registration                                                                                                                                                                                                           | 98.7             | 19.7                      |                                             |
| Venezuela            | 1985-1989   | 4     | 74.3                             | 1988              | Vital Registration                                                                                                                                                                                                           | 100.0            | 25.7                      |                                             |
| Venezuela            | 1990-1994   | 4     | 81.9                             | 1994              | Vital Registration                                                                                                                                                                                                           | 100.0            | 18.1                      |                                             |
| Venezuela            | 1995-1999   | 5     | 87.8                             | 1999              | Vital Registration                                                                                                                                                                                                           | 100.0            | 12.2                      |                                             |
| Venezuela            | 2000-2004   | 5     | 89.9                             | 2001              | Vital Registration                                                                                                                                                                                                           | 100.0            | 10.1                      |                                             |
| Venezuela            | 2005-2009   | 5     | 89.5                             | 2005              | Vital Registration                                                                                                                                                                                                           | 100.0            | 10.5                      |                                             |
| Venezuela            | 2010-2016   | 5     | 89.0                             | 2013              | Vital Registration                                                                                                                                                                                                           | 100.0            | 11.0                      |                                             |
| Vietnam              | 1980-1984   | 0     |                                  |                   |                                                                                                                                                                                                                              |                  |                           |                                             |
| Vietnam              | 1985-1989   | 1     | 0.5                              | 1987              | Are there social inequities in child morbidity and mortality in rural Vietnam                                                                                                                                                |                  | 52.4                      | 1.1                                         |

Appendix Table 17. Underlying indicators for percent well-certified for data source with maximum percent well certified in each 5-year time interval for 195 countries, 1980-2016.

| Location             | Time Window | Stars | Percent Well-Certified (PWC) (%) | Max PWC Data Year | Max PWC Data Source                                                                                                                                                                                                          | Completeness (%) | Percent Major Garbage (%) | Verbal Autopsy Adjustment (None for 3Rs) (%) |
|----------------------|-------------|-------|----------------------------------|-------------------|------------------------------------------------------------------------------------------------------------------------------------------------------------------------------------------------------------------------------|------------------|---------------------------|----------------------------------------------|
| Vietnam              | 1990-1994   | 1     | 0.1                              | 1994              | Maternal mortality in Vietnam in 1994-05                                                                                                                                                                                     |                  | 91.9                      | 1.0                                          |
| Vietnam              | 1995-1999   | 1     | 0.4                              | 1999              | Applying verbal autopsy to determine cause of death in rural Vietnam                                                                                                                                                         |                  | 93.1                      | 6.4                                          |
| Vietnam              | 2000-2004   | 0     |                                  |                   |                                                                                                                                                                                                                              |                  |                           |                                              |
| Vietnam              | 2005-2009   | 3     | 44.1                             | 2008              | Mortality measures from sample-based surveillance: evidence of the epidemiological transition in Viet Nam, Unpublished data                                                                                                  |                  | 31.1                      | 64.0                                         |
| Vietnam              | 2010-2016   | 1     | 3.4                              | 2010              | The causes of deaths in Chilhah between 2008-2010 based on verbal autopsy method                                                                                                                                             |                  | 47.3                      | 6.4                                          |
| Virgin Islands, U.S. | 1980-1984   | 4     | 73.2                             | 1980              | Vital Registration                                                                                                                                                                                                           | 95.1             | 23.1                      |                                              |
| Virgin Islands, U.S. | 1985-1989   | 0     |                                  |                   |                                                                                                                                                                                                                              |                  |                           |                                              |
| Virgin Islands, U.S. | 1990-1994   | 4     | 81.6                             | 1994              | Vital Registration                                                                                                                                                                                                           | 90.2             | 9.6                       |                                              |
| Virgin Islands, U.S. | 1995-1999   | 4     | 84.9                             | 1995              | Vital Registration                                                                                                                                                                                                           | 94.0             | 9.7                       |                                              |
| Virgin Islands, U.S. | 2000-2004   | 4     | 72.0                             | 2000              | Vital Registration                                                                                                                                                                                                           | 80.8             | 10.9                      |                                              |
| Virgin Islands, U.S. | 2005-2009   | 4     | 67.9                             | 2007              | Vital Registration                                                                                                                                                                                                           | 75.0             | 9.4                       |                                              |
| Virgin Islands, U.S. | 2010-2016   | 3     | 66.5                             | 2010              | Vital Registration                                                                                                                                                                                                           | 70.3             | 13.8                      |                                              |
| Yemen                | 1980-1984   | 0     |                                  |                   |                                                                                                                                                                                                                              |                  |                           |                                              |
| Yemen                | 1985-1989   | 0     |                                  |                   |                                                                                                                                                                                                                              |                  |                           |                                              |
| Yemen                | 1990-1994   | 0     |                                  |                   |                                                                                                                                                                                                                              |                  |                           |                                              |
| Yemen                | 1995-1999   | 0     |                                  |                   |                                                                                                                                                                                                                              |                  |                           |                                              |
| Yemen                | 2000-2004   | 0     |                                  |                   |                                                                                                                                                                                                                              |                  |                           |                                              |
| Yemen                | 2005-2009   | 0     |                                  |                   |                                                                                                                                                                                                                              |                  |                           |                                              |
| Yemen                | 2010-2016   | 0     |                                  |                   |                                                                                                                                                                                                                              |                  |                           |                                              |
| Zambia               | 1980-1984   | 0     |                                  |                   |                                                                                                                                                                                                                              |                  |                           |                                              |
| Zambia               | 1985-1989   | 0     |                                  |                   |                                                                                                                                                                                                                              |                  |                           |                                              |
| Zambia               | 1990-1994   | 0     |                                  |                   |                                                                                                                                                                                                                              |                  |                           |                                              |
| Zambia               | 1995-1999   | 0     |                                  |                   |                                                                                                                                                                                                                              |                  |                           |                                              |
| Zambia               | 2000-2004   | 0     |                                  |                   |                                                                                                                                                                                                                              |                  |                           |                                              |
| Zambia               | 2005-2009   | 1     | 5.4                              | 2009              | Zambia Sample Vital Registration with Verbal Autopsy (SAVVY) Data 2010                                                                                                                                                       |                  | 15.6                      | 6.4                                          |
| Zambia               | 2010-2016   | 1     | 5.5                              | 2010              | Zambia Sample Vital Registration with Verbal Autopsy (SAVVY) Data 2010                                                                                                                                                       |                  | 14.0                      | 6.4                                          |
| Zimbabwe             | 1980-1984   | 0     |                                  |                   |                                                                                                                                                                                                                              |                  |                           |                                              |
| Zimbabwe             | 1985-1989   | 0     |                                  |                   |                                                                                                                                                                                                                              |                  |                           |                                              |
| Zimbabwe             | 1990-1994   | 2     | 32.5                             | 1990              | Vital Registration                                                                                                                                                                                                           | 43.2             | 24.7                      |                                              |
| Zimbabwe             | 1995-1999   | 3     | 35.3                             | 1995              | Vital Registration                                                                                                                                                                                                           | 58.2             | 39.4                      |                                              |
| Zimbabwe             | 2000-2004   | 1     | 0.0                              | 2000              | Effect of HIV infection on pregnancy-related mortality in sub-Saharan Africa: secondary analyses of pooled community-based data from the network for Analyzing Longitudinal Population-based HIV/AIDS data on Africa (ALPHA) |                  | 96.6                      | 0.6                                          |
| Zimbabwe             | 2005-2009   | 2     | 23.8                             | 2007              | Vital Registration                                                                                                                                                                                                           | 29.6             | 19.7                      |                                              |
| Zimbabwe             | 2010-2016   | 0     |                                  |                   |                                                                                                                                                                                                                              |                  |                           |                                              |

**Appendix Table 18. Theoretical  
Minimum Risk Reference Life Table**

| <b>Age</b> | <b>Life Expectancy</b> |
|------------|------------------------|
| 0          | 86.6                   |
| 1          | 85.8                   |
| 5          | 81.8                   |
| 10         | 76.8                   |
| 15         | 71.9                   |
| 20         | 66.9                   |
| 25         | 62.0                   |
| 30         | 57.0                   |
| 35         | 52.1                   |
| 40         | 47.2                   |
| 45         | 42.4                   |
| 50         | 37.6                   |
| 55         | 32.9                   |
| 60         | 28.3                   |
| 65         | 23.8                   |
| 70         | 19.4                   |
| 75         | 15.3                   |
| 80         | 11.5                   |
| 85         | 8.2                    |
| 90         | 5.5                    |
| 95         | 3.7                    |
| 100        | 2.6                    |
| 105        | 1.6                    |
| 110        | 1.4                    |

| <b>Appendix Table 19. GBD world population age standard</b> |                              |                |
|-------------------------------------------------------------|------------------------------|----------------|
| <b>Age</b>                                                  | <b>Percent of Population</b> | <b>Rounded</b> |
| ENN                                                         | 0.035667                     | 0.04           |
| LNN                                                         | 0.106232                     | 0.11           |
| PNN                                                         | 1.687834                     | 1.69           |
| 0-1                                                         | 1.829733                     | 1.83           |
| 1-4                                                         | 7.182279                     | 7.18           |
| 5-9                                                         | 8.692810                     | 8.69           |
| 10-14                                                       | 8.395204                     | 8.40           |
| 15-19                                                       | 8.098376                     | 8.10           |
| 20-24                                                       | 7.814477                     | 7.81           |
| 25-29                                                       | 7.559828                     | 7.56           |
| 30-34                                                       | 7.248519                     | 7.25           |
| 35-39                                                       | 6.855877                     | 6.86           |
| 40-44                                                       | 6.384231                     | 6.38           |
| 45-49                                                       | 5.849079                     | 5.85           |
| 50-54                                                       | 5.270976                     | 5.27           |
| 55-59                                                       | 4.678016                     | 4.68           |
| 60-64                                                       | 4.057540                     | 4.06           |
| 65-69                                                       | 3.359068                     | 3.36           |
| 70-74                                                       | 2.629266                     | 2.63           |
| 75-79                                                       | 1.896681                     | 1.90           |
| 80-84                                                       | 1.213480                     | 1.21           |
| 85-89                                                       | 0.644468                     | 0.64           |
| 90-94                                                       | 0.257603                     | 0.26           |
| 95+                                                         | 0.082490                     | 0.08           |
